# Supplementary material for: Genome-wide genetic mutations accumulated in genome-edited pigs and their filial generation for xenotransplantation
Source: Research Square preprint supplement (doi:10.21203/rs.3.rs-3139100/v1), 2023-07-18
Supplement: Supplementary file 1 [file 3bdf762d75464187ddde9d60.xlsx]

## Sheet: Sheet1
	Supplemental Data 2 | Predicted off-target locations by Cas-OFFinder.
	##Generated by Cas-OFFinder 3.0.0
	#Id	Bulge Type	crRNA	DNA	Chromosome	Location	Direction	Mismatches	Bulge Size
	0	DNA	GAGAAAA-TAATGAATGTCAANNN	GAGAAAtTcAATGgATGTCAAAGG	1	23738152	-	3	1
	0	DNA	GAGAAAA-TAATGAATGTCAANNN	GAGAAAAAaAATGtAaGTCAAGGG	1	81612639	+	3	1
	0	DNA	GAGAAAA-TAATGAATGTCAANNN	ctGAAAAATAATGAATGTtAAGAG	1	99254651	+	3	1
	0	DNA	GAGAAAA-TAATGAATGTCAANNN	GAGAAAAATAATtAATGTaAAAAG	1	83948210	+	2	1
	0	DNA	GAGAAAA-TAATGAATGTCAANNN	GAGAAAAGTAAaGAATGTaAgAAG	1	55963715	+	3	1
	0	DNA	GAGAAAA-TAATGAATGTCAANNN	GAGcAAAAgAATGAATcTCAATAG	1	110445944	+	3	1
	0	DNA	GAGAAAA-TAATGAATGTCAANNN	aAGAAAAGaAATGAATGaCAAAAG	1	196732178	-	3	1
	0	DNA	GAGAAAA-TAATGAATGTCAANNN	GAGAAAAATAATtAATGaaAAAAG	1	212688909	+	3	1
	0	DNA	GAGAAAA-TAATGAATGTCAANNN	GAGAAAATTgATGAATaTaAAAAG	1	177629636	+	3	1
	0	DNA	GAGAAAA-TAATGAATGTCAANNN	tAtAAAAATAATGAATGaCAAGAG	1	220200645	-	3	1
	0	DNA	GAGAAAA-TAATGAATGTCAANNN	GgagAAAATAATGAATGTCAAAGG	1	261535932	-	3	1
	0	DNA	GAGAAAATAA-TGAATGTCAANNN	cAGAAAATAAATttATGTCAATGG	1	63124322	-	3	1
	0	DNA	GAGAAAATAA-TGAATGTCAANNN	GAGAAAtTcAATGgATGTCAAAGG	1	23738152	-	3	1
	0	DNA	GAGAAAATAA-TGAATGTCAANNN	GAGAAtATAAATGAATGTaAgTGG	1	51979905	+	3	1
	0	DNA	GAGAAAATAA-TGAATGTCAANNN	aAGAAAAaAATTGAATGTCAcTGG	1	4453074	+	3	1
	0	DNA	GAGAAAATAA-TGAATGTCAANNN	GAtAAAATAtTTGAATtTCAAAAG	1	30975036	+	3	1
	0	DNA	GAGAAAATAA-TGAATGTCAANNN	GAGAAAAaAAATGtAaGTCAAGGG	1	81612639	+	3	1
	0	DNA	GAGAAAATAA-TGAATGTCAANNN	GAGAAAATAAATGAATaagAATGG	1	59712516	+	3	1
	0	DNA	GAGAAAATAA-TGAATGTCAANNN	tAGAAAATAAATtAATtTCAAAAG	1	124920005	+	3	1
	0	DNA	GAGAAAATAA-TGAATGTCAANNN	GAGAAtATAAATGAATtTCAtAGG	1	157079216	+	3	1
	0	DNA	GAGAAAATAA-TGAATGTCAANNN	aAGAAAAgAAGTGAATGTtAAGAG	1	153218099	-	3	1
	0	DNA	GAGAAAATAA-TGAATGTCAANNN	GAGAAAATAATgaAATGTtAATAG	1	164459212	+	3	1
	0	DNA	GAGAAAATAA-TGAATGTCAANNN	aAGAAAAgAAATGAATGaCAAAAG	1	196732178	-	3	1
	0	DNA	GAGAAAATAA-TGAATGTCAANNN	tAaAAAATAAATGAATtTCAAGAG	1	203310824	-	3	1
	0	DNA	GAGAAAATAA-TGAATGTCAANNN	GAGAAAAaAtGaGAATGTCAACAG	1	208361619	-	3	1
	0	DNA	GAGAAAATAA-TGAATGTCAANNN	GAGAAAATAATTcAgTGTtAAGAG	1	182051452	+	3	1
	0	DNA	GAGAAAATAA-TGAATGTCAANNN	aAaAAAATAACTcAATGTCAAAAG	1	206775235	-	3	1
	0	DNA	GAGAAAATAA-TGAATGTCAANNN	GAGtAAATAAATGgATGaCAATAG	1	219317372	+	3	1
	0	DNA	GAGAAAATAA-TGAATGTCAANNN	GAGAAAATAAATGAcTGcCgATAG	1	244630546	-	3	1
	0	DNA	GAGAAAATAA-TGAATGTCAANNN	GAGtAAATAAAaGAATcTCAAAAG	1	226070533	+	3	1
	0	DNA	GAGAAAATAATGAA-TGTCAANNN	GAaAAAATAATcAACTGaCAAGAG	1	61612229	+	3	1
	0	DNA	GAGAAAATAATGAA-TGTCAANNN	atcAAAATAATGAAGTGTCAATGG	1	44691569	-	3	1
	0	DNA	GAGAAAATAATGAA-TGTCAANNN	aAGAAAATAATGtAATGTgAACAG	1	17931584	+	3	1
	0	DNA	GAGAAAATAATGAA-TGTCAANNN	GAGAAAATAATGcATatTCAATGG	1	102950236	-	3	1
	0	DNA	GAGAAAATAATGAA-TGTCAANNN	aAGAAAATAAaGAATTGTCAAAGG	1	102839547	+	2	1
	0	DNA	GAGAAAATAATGAA-TGTCAANNN	aAGAAAcTAATGAATTGTCAcAGG	1	112550067	-	3	1
	0	DNA	GAGAAAATAATGAA-TGTCAANNN	aAGAAAATAATGAgCTGgCAAAGG	1	18975630	-	3	1
	0	DNA	GAGAAAATAATGAA-TGTCAANNN	GAGAAAATAATGAAATGTtAATAG	1	164459212	+	1	1
	0	DNA	GAGAAAATAATGAA-TGTCAANNN	tAGAAAATccTGAATTGTCAAAAG	1	175378511	-	3	1
	0	DNA	GAGAAAATAATGAA-TGTCAANNN	GAGAAAAaAATGAAATGTtAcTGG	1	134098388	-	3	1
	0	DNA	GAGAAAATAATGAA-TGTCAANNN	GAGAAAATAATtcAGTGTtAAGAG	1	182051452	+	3	1
	0	DNA	GAGAAAATAATGAA-TGTCAANNN	tAGAAAATAATGAcTTGTCtAAGG	1	260881290	-	3	1
	0	DNA	GAGAAAATAATGAA-TGTCAANNN	GAGAAAAgAATGAAATGTgAATGG	1	271146928	-	2	1
	0	DNA	GAGAAAATAATGAA-TGTCAANNN	GcaAAAtTAATGAAATGTCAAAGG	1	272354921	+	3	1
	0	DNA	GAGAAAATAATGAATG-TCAANNN	GAaAAAATAATGAtTGCTCAgTGG	1	66518262	+	3	1
	0	DNA	GAGAAAATAATGAATG-TCAANNN	GAcAAAAaAAaGAATGATCAAAAG	1	81901482	+	3	1
	0	DNA	GAGAAAATAATGAATG-TCAANNN	GAtAAAATAATGAATGGcCcAGAG	1	60742393	-	3	1
	0	DNA	GAGAAAATAATGAATG-TCAANNN	GAaAAAATAATGAcTGATCcATGG	1	91074214	-	3	1
	0	DNA	GAGAAAATAATGAATG-TCAANNN	GAGAAAATAATGcATaTTCAATGG	1	102950236	-	2	1
	0	DNA	GAGAAAATAATGAATG-TCAANNN	aAGAAAATAAaGAATtGTCAAAGG	1	102839547	+	3	1
	0	DNA	GAGAAAATAATGAATG-TCAANNN	GAGAAAAgAATGAATaCTtAATGG	1	18750686	+	3	1
	0	DNA	GAGAAAATAATGAATG-TCAANNN	GAaAAAAaAAaGAATGATCAAAAG	1	120142362	-	3	1
	0	DNA	GAGAAAATAATGAATG-TCAANNN	GAGAAAgTtATGAATGATCAtCAG	1	99616039	-	3	1
	0	DNA	GAGAAAATAATGAATG-TCAANNN	GAtAAAATAATGAATGGcCtAAGG	1	22067966	+	3	1
	0	DNA	GAGAAAATAATGAATG-TCAANNN	GAGAAAATAATGAAatGTtAATAG	1	164459212	+	3	1
	0	DNA	GAGAAAATAATGAATG-TCAANNN	GAGAAAATAATacATGATtAACAG	1	170674502	+	3	1
	0	DNA	GAGAAAATAATGAATG-TCAANNN	ccGcAAATAATGAATGCTCAAGAG	1	186997854	+	3	1
	0	DNA	GAGAAAATAATGAATG-TCAANNN	GAGAAAATAATGAAaGAaaAAAAG	1	202523127	-	3	1
	0	DNA	GAGAAAATAATGAATG-TCAANNN	tAGAgAATcATGAATGCTCAAGGG	1	208631153	+	3	1
	0	DNA	GAGAAAATAATGAATGTCAA-NNN	aAGAAAATAATGAtTGTtAATTGG	1	22924117	+	3	1
	0	DNA	GAGAAAATAATGAATGTCAA-NNN	GAaAAAAaAATGAAgGTCAATCGG	1	45053817	+	3	1
	0	DNA	GAGAAAATAATGAATGTCAA-NNN	aAGAAAATAcTGAATGcCAATAAG	1	40551436	-	3	1
	0	DNA	GAGAAAATAATGAATGTCAA-NNN	GAGAAAATAATaAAaGTgAAACAG	1	41234899	-	3	1
	0	DNA	GAGAAAATAATGAATGTCAA-NNN	GAGAgAAgAATGAATGTCAgATGG	1	46847830	-	3	1
	0	DNA	GAGAAAATAATGAATGTCAA-NNN	GAGAAAATAATttAgGTCAAGAGG	1	64832051	+	3	1
	0	DNA	GAGAAAATAATGAATGTCAA-NNN	tAGAAAATAATtcATGTCAAACAG	1	64934821	-	3	1
	0	DNA	GAGAAAATAATGAATGTCAA-NNN	GAGAAAAaAATGAATtTaAATGGG	1	67495988	+	3	1
	0	DNA	GAGAAAATAATGAATGTCAA-NNN	GAGAAAtgAATGAATGaCAAGAGG	1	66603410	-	3	1
	0	DNA	GAGAAAATAATGAATGTCAA-NNN	GAGAAAATAAgcAATaTCAAAAAG	1	68764764	+	3	1
	0	DNA	GAGAAAATAATGAATGTCAA-NNN	GAGAAgAgAgTGAATGTCAAGGAG	1	68626303	+	3	1
	0	DNA	GAGAAAATAATGAATGTCAA-NNN	GAGAAAtaAATGAATGTaAATGAG	1	69820690	-	3	1
	0	DNA	GAGAAAATAATGAATGTCAA-NNN	GAGAAgATAATGcATGTgAAAAAG	1	85361266	+	3	1
	0	DNA	GAGAAAATAATGAATGTCAA-NNN	GAGAAAAaAATGgAaGTCAAGAAG	1	32143167	+	3	1
	0	DNA	GAGAAAATAATGAATGTCAA-NNN	tAGAAAATAATGAAaGcCAATCAG	1	90001304	+	3	1
	0	DNA	GAGAAAATAATGAATGTCAA-NNN	tAGAAAATAATcAATGTaAAGGGG	1	91446445	+	3	1
	0	DNA	GAGAAAATAATGAATGTCAA-NNN	GAGAAAATAtaGAATGTaAACCAG	1	101858470	-	3	1
	0	DNA	GAGAAAATAATGAATGTCAA-NNN	GAGAAAATAcTGAAaGTCAAGAAG	1	162620015	+	2	1
	0	DNA	GAGAAAATAATGAATGTCAA-NNN	GAGAActTAATGAATGTgAATCAG	1	151554104	+	3	1
	0	DNA	GAGAAAATAATGAATGTCAA-NNN	GAGAAAATAATGAAaGaaAAAAAG	1	202523127	-	3	1
	0	DNA	GAGAAAATAATGAATGTCAA-NNN	GAtAAAATAATagATGTCAATAGG	1	225051512	-	3	1
	0	DNA	GAGAAAATAATGAATGTCAA-NNN	GAGAAAAacATGAcTGTCAAAAAG	1	252308982	+	3	1
	0	DNA	GAGAAAATAATGAATGTCA-ANNN	GAGAAtATAATGgATaTCATATAG	1	33949347	+	3	1
	0	DNA	GAGAAAATAATGAATGTCA-ANNN	GAGAAAATAATaAAaGTgAAACAG	1	41234899	-	3	1
	0	DNA	GAGAAAATAATGAATGTCA-ANNN	GAGAgAAgAATGAATGTCAGATGG	1	46847830	-	2	1
	0	DNA	GAGAAAATAATGAATGTCA-ANNN	tAGAAAATAATtcATGTCAAACAG	1	64934821	-	3	1
	0	DNA	GAGAAAATAATGAATGTCA-ANNN	GAcAAAATAATcAgTGTCACAGAG	1	57004807	+	3	1
	0	DNA	GAGAAAATAATGAATGTCA-ANNN	GAGAAAATAAgcAATaTCAAAAAG	1	68764764	+	3	1
	0	DNA	GAGAAAATAATGAATGTCA-ANNN	GAGAAAAaAAaGAATaTCAGAGAG	1	84128870	-	3	1
	0	DNA	GAGAAAATAATGAATGTCA-ANNN	GAGAAgATAATGcATGTgAAAAAG	1	85361266	+	3	1
	0	DNA	GAGAAAATAATGAATGTCA-ANNN	tAGAAAATAATGccTGTCACAGAG	1	85887277	-	3	1
	0	DNA	GAGAAAATAATGAATGTCA-ANNN	GAGAAAtTAtTtAATGTCATAGAG	1	33591406	+	3	1
	0	DNA	GAGAAAATAATGAATGTCA-ANNN	GAtAAAATAATGAATGgCcCAGAG	1	60742393	-	3	1
	0	DNA	GAGAAAATAATGAATGTCA-ANNN	GAtAAAATAATGAATGgCcTAAGG	1	22067966	+	3	1
	0	DNA	GAGAAAATAATGAATGTCA-ANNN	GAGAAAATAcTGAAaGTCAAgAAG	1	162620015	+	3	1
	0	DNA	GAGAAAATAATGAATGTCA-ANNN	GAGAAAATAATGAAaGaaAAAAAG	1	202523127	-	3	1
	0	DNA	GAGAAAATAATGAATGTCA-ANNN	aAGAAAATAATaAATGTtAGAAAG	1	217055949	+	3	1
	0	DNA	GAGAAAATAATGAATGTCA-ANNN	aAGAAAATAATaAAaGTCAGAGGG	1	199513751	+	3	1
	0	DNA	GAGAAAATAATGAATGTCA-ANNN	aAGAAAATAAaGAATcTCACAAAG	1	183082538	-	3	1
	0	DNA	GAGAAAATAATGAATGTCA-ANNN	GAGAAcATAATaAATGcCATAGAG	1	231444187	+	3	1
	0	DNA	GAGAAAATAATGAATGTCA-ANNN	GAGAgAAcAgTGAATGTCAGAGAG	1	222984442	+	3	1
	0	DNA	GAGAAAATAATGAATGTCA-ANNN	GAGAAAAacATGAcTGTCAAAAAG	1	252308982	+	3	1
	0	DNA	GAGAAAATAATGAATGTC-AANNN	GAGAAAATAATaAAaGTgAAACAG	1	41234899	-	3	1
	0	DNA	GAGAAAATAATGAATGTC-AANNN	GAGcAAATAATaAATGTgTAATAG	1	63111746	-	3	1
	0	DNA	GAGAAAATAATGAATGTC-AANNN	GAGAgAAgAATGAATGTCAgATGG	1	46847830	-	3	1
	0	DNA	GAGAAAATAATGAATGTC-AANNN	tAGAAAATAATtcATGTCAAACAG	1	64934821	-	3	1
	0	DNA	GAGAAAATAATGAATGTC-AANNN	GAGAAAATAAgcAATaTCAAAAAG	1	68764764	+	3	1
	0	DNA	GAGAAAATAATGAATGTC-AANNN	GAGAAgATAATGcATGTgAAAAAG	1	85361266	+	3	1
	0	DNA	GAGAAAATAATGAATGTC-AANNN	GAtAAAATAATGAATGgCCcAGAG	1	60742393	-	3	1
	0	DNA	GAGAAAATAATGAATGTC-AANNN	GAGAAAATAATGcATaTtCAATGG	1	102950236	-	3	1
	0	DNA	GAGAAAATAATGAATGTC-AANNN	GAGAAAATAcTGAAaGTCAAgAAG	1	162620015	+	3	1
	0	DNA	GAGAAAATAATGAATGTC-AANNN	GAtAAAATAATGAATGgCCtAAGG	1	22067966	+	3	1
	0	DNA	GAGAAAATAATGAATGTC-AANNN	GctAAAATAATGAATcTCTAATGG	1	142816443	+	3	1
	0	DNA	GAGAAAATAATGAATGTC-AANNN	GAGAAAATAATGAAaGaaAAAAAG	1	202523127	-	3	1
	0	DNA	GAGAAAATAATGAATGTC-AANNN	GAGAAAtTttTGAATGTCTAAAAG	1	217572916	+	3	1
	0	DNA	GAGAAAATAATGAATGTC-AANNN	GAGAAAAacATGAcTGTCAAAAAG	1	252308982	+	3	1
	0	DNA	GAGAAAATAATGAATGTC-AANNN	GAGAAgATAATGcATGTaGAAGAG	1	258810125	+	3	1
	0	DNA	GAGAAAATAATGAATGT-CAANNN	GgcAAAATAATGAATaTACAAAAG	1	28638806	-	3	1
	0	DNA	GAGAAAATAATGAATGT-CAANNN	GAGAAAATAATaAAaGTGaAACAG	1	41234899	-	3	1
	0	DNA	GAGAAAATAATGAATGT-CAANNN	GAGcAAATAATaAATGTGtAATAG	1	63111746	-	3	1
	0	DNA	GAGAAAATAATGAATGT-CAANNN	GAGAAgATAATGcATGTGaAAAAG	1	85361266	+	3	1
	0	DNA	GAGAAAATAATGAATGT-CAANNN	GAtAAAATAATGAATGgCCcAGAG	1	60742393	-	3	1
	0	DNA	GAGAAAATAATGAATGT-CAANNN	GAGAAAATAATGcATaTTCAATGG	1	102950236	-	2	1
	0	DNA	GAGAAAATAATGAATGT-CAANNN	GAtAAAATAATGAATGgCCtAAGG	1	22067966	+	3	1
	0	DNA	GAGAAAATAATGAATGT-CAANNN	GAGAAAATAATGAAaGaAaAAAAG	1	202523127	-	3	1
	0	DNA	GAGAAAATAATGAATGT-CAANNN	GAGAAAATgATatATGTGCAATGG	1	156720901	+	3	1
	0	DNA	GAGAAAATAATGAATGT-CAANNN	GAGAAgATAATGcATGTAgAAGAG	1	258810125	+	3	1
	0	DNA	GAGAAAATAATGAATGT-CAANNN	GtGAAAATAcTGAATGTGCtACAG	1	273030694	-	3	1
	0	DNA	GAGAAAATAATGAAT-GTCAANNN	GAGAAAATAgTaAATAGTaAACAG	1	84851996	+	3	1
	0	DNA	GAGAAAATAATGAAT-GTCAANNN	GAtAAAATAATGAATGGcCcAGAG	1	60742393	-	3	1
	0	DNA	GAGAAAATAATGAAT-GTCAANNN	GAGAAAATAATGcATAtTCAATGG	1	102950236	-	2	1
	0	DNA	GAGAAAATAATGAAT-GTCAANNN	aAGAAAATAAaGAATTGTCAAAGG	1	102839547	+	2	1
	0	DNA	GAGAAAATAATGAAT-GTCAANNN	aAGAAAcTAATGAATTGTCAcAGG	1	112550067	-	3	1
	0	DNA	GAGAAAATAATGAAT-GTCAANNN	GtGAAAcTAATGAATAGTCAtAGG	1	123641157	+	3	1
	0	DNA	GAGAAAATAATGAAT-GTCAANNN	GAGAAAAgAATGAATAcTtAATGG	1	18750686	+	3	1
	0	DNA	GAGAAAATAATGAAT-GTCAANNN	GAtAAAATAATGAATGGcCtAAGG	1	22067966	+	3	1
	0	DNA	GAGAAAATAATGAAT-GTCAANNN	GAGAAAATAATGAAaTGTtAATAG	1	164459212	+	2	1
	0	DNA	GAGAAAATAATGAAT-GTCAANNN	tAGAAAATccTGAATTGTCAAAAG	1	175378511	-	3	1
	0	DNA	GAGAAAATAATGAAT-GTCAANNN	GAGAAAAatATtAATAGTCAAAAG	1	221775357	-	3	1
	0	DNA	GAGAAAATAATGAAT-GTCAANNN	tAGAAAATAATGAcTTGTCtAAGG	1	260881290	-	3	1
	0	DNA	GAGAAAATAATGAAT-GTCAANNN	GAGAAAAgAATGAAaTGTgAATGG	1	271146928	-	3	1
	0	DNA	GAGAAAATAATGA-ATGTCAANNN	cAaAAAATAATGATATaTCAAAGG	1	51532444	-	3	1
	0	DNA	GAGAAAATAATGA-ATGTCAANNN	aAGAAAATAATGtAATGTgAACAG	1	17931584	+	3	1
	0	DNA	GAGAAAATAATGA-ATGTCAANNN	aAGAAAATAAaGAAtTGTCAAAGG	1	102839547	+	3	1
	0	DNA	GAGAAAATAATGA-ATGTCAANNN	GAGAAAtTAATaACATGTCcAAGG	1	48858451	+	3	1
	0	DNA	GAGAAAATAATGA-ATGTCAANNN	aAGAAAATAATGAGcTGgCAAAGG	1	18975630	-	3	1
	0	DNA	GAGAAAATAATGA-ATGTCAANNN	GAGAAAATAATGAAATGTtAATAG	1	164459212	+	1	1
	0	DNA	GAGAAAATAATGA-ATGTCAANNN	GAGAAttTAATGAGATGTCAtAGG	1	111493523	+	3	1
	0	DNA	GAGAAAATAATGA-ATGTCAANNN	GAGAAAAaAATGAAATGTtAcTGG	1	134098388	-	3	1
	0	DNA	GAGAAAATAATGA-ATGTCAANNN	GtaAAAATAATGATATaTCAAGGG	1	171555010	-	3	1
	0	DNA	GAGAAAATAATGA-ATGTCAANNN	aAtAAAcTAATGACATGTCAAGGG	1	238804631	-	3	1
	0	DNA	GAGAAAATAATGA-ATGTCAANNN	GgGAAAATAggGAGATGTCAACAG	1	242891989	-	3	1
	0	DNA	GAGAAAATAATGA-ATGTCAANNN	cAaAcAATAATGACATGTCAAAAG	1	253006840	+	3	1
	0	DNA	GAGAAAATAATGA-ATGTCAANNN	GAGAAAAgAATGAAATGTgAATGG	1	271146928	-	2	1
	0	DNA	GAGAAAATAATGA-ATGTCAANNN	GcaAAAtTAATGAAATGTCAAAGG	1	272354921	+	3	1
	0	DNA	GAGAAAATAATGA-ATGTCAANNN	tAGAAAATAATGACtTGTCtAAGG	1	260881290	-	3	1
	0	DNA	GAGAAAATAATG-AATGTCAANNN	GAGAgAATAATGCAATGatAAGAG	1	35435710	+	3	1
	0	DNA	GAGAAAATAATG-AATGTCAANNN	GAGAcAccAATGTAATGTCAAGGG	1	65589583	+	3	1
	0	DNA	GAGAAAATAATG-AATGTCAANNN	aAGAAAATAATGTAATGTgAACAG	1	17931584	+	2	1
	0	DNA	GAGAAAATAATG-AATGTCAANNN	GAGAAAATAATaCAATcaCAAAAG	1	75806107	-	3	1
	0	DNA	GAGAAAATAATG-AATGTCAANNN	aAGgAAATAATGCAATGgCAAAAG	1	31653940	-	3	1
	0	DNA	GAGAAAATAATG-AATGTCAANNN	GAGAAAATAATGCAtatTCAATGG	1	102950236	-	3	1
	0	DNA	GAGAAAATAATG-AATGTCAANNN	aAGAAAATAAaGAAtTGTCAAAGG	1	102839547	+	3	1
	0	DNA	GAGAAAATAATG-AATGTCAANNN	aAGAtAATAATGTAATGTCAtGAG	1	126728389	-	3	1
	0	DNA	GAGAAAATAATG-AATGTCAANNN	GAtAAAAaAATGGAATtTCAATGG	1	136793148	+	3	1
	0	DNA	GAGAAAATAATG-AATGTCAANNN	GAGAAAATAATGAAATGTtAATAG	1	164459212	+	1	1
	0	DNA	GAGAAAATAATG-AATGTCAANNN	cAGAAAATAATGGAATGagAATAG	1	132305386	+	3	1
	0	DNA	GAGAAAATAATG-AATGTCAANNN	GAGAAAAaAATGAAATGTtAcTGG	1	134098388	-	3	1
	0	DNA	GAGAAAATAATG-AATGTCAANNN	GAGAAAATAATtCAgTGTtAAGAG	1	182051452	+	3	1
	0	DNA	GAGAAAATAATG-AATGTCAANNN	GAGAAAAgAATGAAATGTgAATGG	1	271146928	-	2	1
	0	DNA	GAGAAAATAATG-AATGTCAANNN	GcaAAAtTAATGAAATGTCAAAGG	1	272354921	+	3	1
	0	DNA	GAGAAAATAAT-GAATGTCAANNN	aAGAAAATAATGtAATGTgAACAG	1	17931584	+	3	1
	0	DNA	GAGAAAATAAT-GAATGTCAANNN	aAGAAAAaAATTGAATGTCAcTGG	1	4453074	+	3	1
	0	DNA	GAGAAAATAAT-GAATGTCAANNN	GAGAAAATAATAcAATcaCAAAAG	1	75806107	-	3	1
	0	DNA	GAGAAAATAAT-GAATGTCAANNN	GAtAAAATAtTTGAATtTCAAAAG	1	30975036	+	3	1
	0	DNA	GAGAAAATAAT-GAATGTCAANNN	GAtAAAAaAATGGAATtTCAATGG	1	136793148	+	3	1
	0	DNA	GAGAAAATAAT-GAATGTCAANNN	GAGAAAATAATGaAATGTtAATAG	1	164459212	+	2	1
	0	DNA	GAGAAAATAAT-GAATGTCAANNN	cAGAAAATAATGGAATGagAATAG	1	132305386	+	3	1
	0	DNA	GAGAAAATAAT-GAATGTCAANNN	GAGAAAAaAtgAGAATGTCAACAG	1	208361619	-	3	1
	0	DNA	GAGAAAATAAT-GAATGTCAANNN	GAGAAAATAATTcAgTGTtAAGAG	1	182051452	+	3	1
	0	DNA	GAGAAAATAAT-GAATGTCAANNN	GAGtAAATAAaAGAATcTCAAAAG	1	226070533	+	3	1
	0	DNA	GAGAAAATAAT-GAATGTCAANNN	GAGAAAAgAATGaAATGTgAATGG	1	271146928	-	3	1
	0	DNA	GAGAAAATA-ATGAATGTCAANNN	cAGAAAATAAATttATGTCAATGG	1	63124322	-	3	1
	0	DNA	GAGAAAATA-ATGAATGTCAANNN	GAGAAAtTcAATGgATGTCAAAGG	1	23738152	-	3	1
	0	DNA	GAGAAAATA-ATGAATGTCAANNN	GAGAAgATACATGAAaaTCAAAAG	1	13259750	+	3	1
	0	DNA	GAGAAAATA-ATGAATGTCAANNN	GAGAAtATAAATGAATGTaAgTGG	1	51979905	+	3	1
	0	DNA	GAGAAAATA-ATGAATGTCAANNN	GAtAAAATATtTGAATtTCAAAAG	1	30975036	+	3	1
	0	DNA	GAGAAAATA-ATGAATGTCAANNN	GAGAAAAaAAATGtAaGTCAAGGG	1	81612639	+	3	1
	0	DNA	GAGAAAATA-ATGAATGTCAANNN	GAGAAgATAGATGAgTGTCcAGGG	1	91142221	+	3	1
	0	DNA	GAGAAAATA-ATGAATGTCAANNN	GAGAAAATAAATGAATaagAATGG	1	59712516	+	3	1
	0	DNA	GAGAAAATA-ATGAATGTCAANNN	GAcAAAATAGAaGAAaGTCAAAAG	1	112554777	-	3	1
	0	DNA	GAGAAAATA-ATGAATGTCAANNN	tAGAAAATAAATtAATtTCAAAAG	1	124920005	+	3	1
	0	DNA	GAGAAAATA-ATGAATGTCAANNN	GAGAAtATAAATGAATtTCAtAGG	1	157079216	+	3	1
	0	DNA	GAGAAAATA-ATGAATGTCAANNN	GAGAAAATACATaAATGTatACAG	1	158021933	-	3	1
	0	DNA	GAGAAAATA-ATGAATGTCAANNN	GAaAAAATATATGAATGgCcAAAG	1	186277078	+	3	1
	0	DNA	GAGAAAATA-ATGAATGTCAANNN	aAGAAAAgAAATGAATGaCAAAAG	1	196732178	-	3	1
	0	DNA	GAGAAAATA-ATGAATGTCAANNN	GAttAAATACATGAATGaCAATGG	1	170324202	-	3	1
	0	DNA	GAGAAAATA-ATGAATGTCAANNN	tAaAAAATAAATGAATtTCAAGAG	1	203310824	-	3	1
	0	DNA	GAGAAAATA-ATGAATGTCAANNN	GAGAAAAaATgaGAATGTCAACAG	1	208361619	-	3	1
	0	DNA	GAGAAAATA-ATGAATGTCAANNN	GAGtAAAcAGATGAATGTCAtGGG	1	209979258	+	3	1
	0	DNA	GAGAAAATA-ATGAATGTCAANNN	GAaAAAtTACATGtATGTCAATAG	1	210604426	+	3	1
	0	DNA	GAGAAAATA-ATGAATGTCAANNN	GAGAAAATtGATGAATaTaAAAAG	1	177629636	+	3	1
	0	DNA	GAGAAAATA-ATGAATGTCAANNN	GAGtAAATAAATGgATGaCAATAG	1	219317372	+	3	1
	0	DNA	GAGAAAATA-ATGAATGTCAANNN	cAaAAAATATATGAATtTCAACGG	1	227365886	+	3	1
	0	DNA	GAGAAAATA-ATGAATGTCAANNN	GAaAAAATATATGAActTCAAAAG	1	240244309	-	3	1
	0	DNA	GAGAAAATA-ATGAATGTCAANNN	GAGAAAATAAATGAcTGcCgATAG	1	244630546	-	3	1
	0	DNA	GAGAAAATA-ATGAATGTCAANNN	GAGAAAAcAGATGgATGaCAAAGG	1	247335331	-	3	1
	0	DNA	GAGAAAATA-ATGAATGTCAANNN	GAGtAAATAAAaGAATcTCAAAAG	1	226070533	+	3	1
	0	DNA	GAGAAAATA-ATGAATGTCAANNN	aAGAAtATATATGAATGaCAATAG	1	265016794	-	3	1
	0	DNA	GAGAAAATA-ATGAATGTCAANNN	GAGAAtATATATGAgTGTgAATGG	1	253384519	-	3	1
	0	DNA	GAGAAAAT-AATGAATGTCAANNN	GAGAAAtTCAATGgATGTCAAAGG	1	23738152	-	2	1
	0	DNA	GAGAAAAT-AATGAATGTCAANNN	cAGAAAATAAATttATGTCAATGG	1	63124322	-	3	1
	0	DNA	GAGAAAAT-AATGAATGTCAANNN	GAGAAtATAAATGAATGTaAgTGG	1	51979905	+	3	1
	0	DNA	GAGAAAAT-AATGAATGTCAANNN	GAGAAAAaAAATGtAaGTCAAGGG	1	81612639	+	3	1
	0	DNA	GAGAAAAT-AATGAATGTCAANNN	GAGAAAATAAATGAATaagAATGG	1	59712516	+	3	1
	0	DNA	GAGAAAAT-AATGAATGTCAANNN	tAGAAAATAAATtAATtTCAAAAG	1	124920005	+	3	1
	0	DNA	GAGAAAAT-AATGAATGTCAANNN	GAGAAAAaTAATtAATGTaAAAAG	1	83948210	+	3	1
	0	DNA	GAGAAAAT-AATGAATGTCAANNN	GAGAAAATCAATcAATaTaAACAG	1	105885639	+	3	1
	0	DNA	GAGAAAAT-AATGAATGTCAANNN	GAGcAAAaGAATGAATcTCAATAG	1	110445944	+	3	1
	0	DNA	GAGAAAAT-AATGAATGTCAANNN	GAGAAtATAAATGAATtTCAtAGG	1	157079216	+	3	1
	0	DNA	GAGAAAAT-AATGAATGTCAANNN	cAGAAtATGAATGAATcTCAAAAG	1	127984907	-	3	1
	0	DNA	GAGAAAAT-AATGAATGTCAANNN	aAGAAAAgAAATGAATGaCAAAAG	1	196732178	-	3	1
	0	DNA	GAGAAAAT-AATGAATGTCAANNN	tAaAAAATAAATGAATtTCAAGAG	1	203310824	-	3	1
	0	DNA	GAGAAAAT-AATGAATGTCAANNN	GAGAAAATCAAaGAgTGTCtAGAG	1	180335465	+	3	1
	0	DNA	GAGAAAAT-AATGAATGTCAANNN	GAGAAAATTgATGAATaTaAAAAG	1	177629636	+	3	1
	0	DNA	GAGAAAAT-AATGAATGTCAANNN	GAGtAAATAAATGgATGaCAATAG	1	219317372	+	3	1
	0	DNA	GAGAAAAT-AATGAATGTCAANNN	GAGtAAATGAATGAATGaaAAAGG	1	229551873	+	3	1
	0	DNA	GAGAAAAT-AATGAATGTCAANNN	GAGAAAATAAATGAcTGcCgATAG	1	244630546	-	3	1
	0	DNA	GAGAAAAT-AATGAATGTCAANNN	GAGtAAATAAAaGAATcTCAAAAG	1	226070533	+	3	1
	0	DNA	GAGAAAAT-AATGAATGTCAANNN	tAtAAAATCAATGAATaTCAAAAG	1	252519301	+	3	1
	0	DNA	GAGAAA-ATAATGAATGTCAANNN	GAaAAATATAATGtATGgCAATGG	1	23092558	+	3	1
	0	DNA	GAGAAA-ATAATGAATGTCAANNN	GAGAAATtcAATGgATGTCAAAGG	1	23738152	-	3	1
	0	DNA	GAGAAA-ATAATGAATGTCAANNN	GAGAgACAaAATGAATtTCAAAAG	1	16208027	+	3	1
	0	DNA	GAGAAA-ATAATGAATGTCAANNN	GAGAAAAAaAATGtAaGTCAAGGG	1	81612639	+	3	1
	0	DNA	GAGAAA-ATAATGAATGTCAANNN	GAtAAACAcAATGAATGgCAAAAG	1	92215633	+	3	1
	0	DNA	GAGAAA-ATAATGAATGTCAANNN	ctGAAAAATAATGAATGTtAAGAG	1	99254651	+	3	1
	0	DNA	GAGAAA-ATAATGAATGTCAANNN	GAGAAATAcAATGAAatTCAATAG	1	38784476	-	3	1
	0	DNA	GAGAAA-ATAATGAATGTCAANNN	GAGAAtCATAgTGAATGTgAAAGG	1	38831103	-	3	1
	0	DNA	GAGAAA-ATAATGAATGTCAANNN	GAGAAAAATAATtAATGTaAAAAG	1	83948210	+	2	1
	0	DNA	GAGAAA-ATAATGAATGTCAANNN	GAGcAAAAgAATGAATcTCAATAG	1	110445944	+	3	1
	0	DNA	GAGAAA-ATAATGAATGTCAANNN	GAGAAAGAgAATGAtTGcCAAAAG	1	181303958	+	3	1
	0	DNA	GAGAAA-ATAATGAATGTCAANNN	GAGAAAAATAATtAATGaaAAAAG	1	212688909	+	3	1
	0	DNA	GAGAAA-ATAATGAATGTCAANNN	tAtAAAAATAATGAATGaCAAGAG	1	220200645	-	3	1
	0	DNA	GAGAAA-ATAATGAATGTCAANNN	GAGAAAGATtATGcATcTCAAAAG	1	245967883	-	3	1
	0	DNA	GAGAAA-ATAATGAATGTCAANNN	GAGAAATATgATGcATGcCAAAGG	1	225875977	+	3	1
	0	DNA	GAGAAA-ATAATGAATGTCAANNN	GgagAAAATAATGAATGTCAAAGG	1	261535932	-	3	1
	0	DNA	GAGAA-AATAATGAATGTCAANNN	aAGAATAATgATGAATGTaAATAG	1	34650810	-	3	1
	0	DNA	GAGAA-AATAATGAATGTCAANNN	GAcAAGAATAAcGAATtTCAACAG	1	66649932	+	3	1
	0	DNA	GAGAA-AATAATGAATGTCAANNN	GAGAAAAAaAATGtAaGTCAAGGG	1	81612639	+	3	1
	0	DNA	GAGAA-AATAATGAATGTCAANNN	GAGAgTAATAATGAAaGTCAgAGG	1	57704361	-	3	1
	0	DNA	GAGAA-AATAATGAATGTCAANNN	ctGAAAAATAATGAATGTtAAGAG	1	99254651	+	3	1
	0	DNA	GAGAA-AATAATGAATGTCAANNN	GAGAATcATAgTGAATGTgAAAGG	1	38831103	-	3	1
	0	DNA	GAGAA-AATAATGAATGTCAANNN	GAGAAAAATAATtAATGTaAAAAG	1	83948210	+	2	1
	0	DNA	GAGAA-AATAATGAATGTCAANNN	GAGcAAAAgAATGAATcTCAATAG	1	110445944	+	3	1
	0	DNA	GAGAA-AATAATGAATGTCAANNN	GtGAAGAATAATGAATcaCAAAGG	1	175525082	-	3	1
	0	DNA	GAGAA-AATAATGAATGTCAANNN	aAGAAGAAaAATaAATGTCAAGAG	1	149408410	+	3	1
	0	DNA	GAGAA-AATAATGAATGTCAANNN	GAtAAGAATAATGAtTGaCAAGAG	1	189920317	-	3	1
	0	DNA	GAGAA-AATAATGAATGTCAANNN	GAGAAAAATAATtAATGaaAAAAG	1	212688909	+	3	1
	0	DNA	GAGAA-AATAATGAATGTCAANNN	tAtAAAAATAATGAATGaCAAGAG	1	220200645	-	3	1
	0	DNA	GAGAA-AATAATGAATGTCAANNN	GgagAAAATAATGAATGTCAAAGG	1	261535932	-	3	1
	0	DNA	GAGA-AAATAATGAATGTCAANNN	GAGAGAcAaAATGAATtTCAAAAG	1	16208027	+	3	1
	0	DNA	GAGA-AAATAATGAATGTCAANNN	GAGAAAAAaAATGtAaGTCAAGGG	1	81612639	+	3	1
	0	DNA	GAGA-AAATAATGAATGTCAANNN	GAGAGtAATAATGAAaGTCAgAGG	1	57704361	-	3	1
	0	DNA	GAGA-AAATAATGAATGTCAANNN	ctGAAAAATAATGAATGTtAAGAG	1	99254651	+	3	1
	0	DNA	GAGA-AAATAATGAATGTCAANNN	GAGAAAAATAATtAATGTaAAAAG	1	83948210	+	2	1
	0	DNA	GAGA-AAATAATGAATGTCAANNN	GAGcAAAAgAATGAATcTCAATAG	1	110445944	+	3	1
	0	DNA	GAGA-AAATAATGAATGTCAANNN	GAaATAAAaAATGAATGgCAAAGG	1	172298553	+	3	1
	0	DNA	GAGA-AAATAATGAATGTCAANNN	GAGAAAAATAATtAATGaaAAAAG	1	212688909	+	3	1
	0	DNA	GAGA-AAATAATGAATGTCAANNN	GAaAGAAATAATGAATcTCtAAGG	1	217916266	+	3	1
	0	DNA	GAGA-AAATAATGAATGTCAANNN	tAtAAAAATAATGAATGaCAAGAG	1	220200645	-	3	1
	0	DNA	GAGA-AAATAATGAATGTCAANNN	GgagAAAATAATGAATGTCAAAGG	1	261535932	-	3	1
	0	DNA	GAG-AAAATAATGAATGTCAANNN	GAGAAAAAaAATGtAaGTCAAGGG	1	81612639	+	3	1
	0	DNA	GAG-AAAATAATGAATGTCAANNN	GAGTAAAATcATGAATaTaAACAG	1	88507261	+	3	1
	0	DNA	GAG-AAAATAATGAATGTCAANNN	ctGAAAAATAATGAATGTtAAGAG	1	99254651	+	3	1
	0	DNA	GAG-AAAATAATGAATGTCAANNN	GAGAAAAATAATtAATGTaAAAAG	1	83948210	+	2	1
	0	DNA	GAG-AAAATAATGAATGTCAANNN	GAGCAAAAgAATGAATcTCAATAG	1	110445944	+	2	1
	0	DNA	GAG-AAAATAATGAATGTCAANNN	GAGGAAAATAATGAATtTatAGAG	1	196268676	+	3	1
	0	DNA	GAG-AAAATAATGAATGTCAANNN	tAGGAAAAcAATaAATGTCAAAGG	1	170920096	+	3	1
	0	DNA	GAG-AAAATAATGAATGTCAANNN	GAGTAAAATAAaGctTGTCAAGAG	1	177014790	+	3	1
	0	DNA	GAG-AAAATAATGAATGTCAANNN	GAGAAAAATAATtAATGaaAAAAG	1	212688909	+	3	1
	0	DNA	GAG-AAAATAATGAATGTCAANNN	tAtAAAAATAATGAATGaCAAGAG	1	220200645	-	3	1
	0	DNA	GAG-AAAATAATGAATGTCAANNN	GAGTAAAATAATGAgTtcCAAGAG	1	222796887	-	3	1
	0	DNA	GAG-AAAATAATGAATGTCAANNN	GgaGAAAATAATGAATGTCAAAGG	1	261535932	-	2	1
	0	DNA	GA-GAAAATAATGAATGTCAANNN	aATGAAAATAATGgATGaCAAGGG	1	39873504	-	3	1
	0	DNA	GA-GAAAATAATGAATGTCAANNN	GATGAAAAcAATcAATaTCAATAG	1	80378010	+	3	1
	0	DNA	GA-GAAAATAATGAATGTCAANNN	GATGAAtATAATGAAaGTCtAAAG	1	3981427	+	3	1
	0	DNA	GA-GAAAATAATGAATGTCAANNN	GAAGtAcATAATGAATGTtAAAGG	1	32296350	+	3	1
	0	DNA	GA-GAAAATAATGAATGTCAANNN	GATGAAAAaAATGAATtTaAAGAG	1	85469461	+	3	1
	0	DNA	GA-GAAAATAATGAATGTCAANNN	GgAGAAcATAATtAATGTCAATGG	1	61425491	-	3	1
	0	DNA	GA-GAAAATAATGAATGTCAANNN	aAAGAAAATAcTGAATtTCAATAG	1	118714482	-	3	1
	0	DNA	GA-GAAAATAATGAATGTCAANNN	GAGaAAAATAATtAATGTaAAAAG	1	83948210	+	3	1
	0	DNA	GA-GAAAATAATGAATGTCAANNN	ttAGAAAATAATaAATGTCAAAAG	1	19738886	+	3	1
	0	DNA	GA-GAAAATAATGAATGTCAANNN	GAGcAAAAgAATGAATcTCAATAG	1	110445944	+	3	1
	0	DNA	GA-GAAAATAATGAATGTCAANNN	GAAGAAAATAATaAATGTaAgAAG	1	152365592	-	3	1
	0	DNA	GA-GAAAATAATGAATGTCAANNN	GAGGAAAATAATGAATtTatAGAG	1	196268676	+	3	1
	0	DNA	GA-GAAAATAATGAATGTCAANNN	tAGGAAAAcAATaAATGTCAAAGG	1	170920096	+	3	1
	0	DNA	GA-GAAAATAATGAATGTCAANNN	GAAGAAAATAATGgAgGTaAAAGG	1	193338224	+	3	1
	0	DNA	GA-GAAAATAATGAATGTCAANNN	tATaAAAATAATGAATGaCAAGAG	1	220200645	-	3	1
	0	DNA	GA-GAAAATAATGAATGTCAANNN	GATGAAAtTAATGAATtTCAcTGG	1	236711547	+	3	1
	0	DNA	GA-GAAAATAATGAATGTCAANNN	GATGAAgAaAATGAATtTCAAGAG	1	256976232	-	3	1
	0	DNA	GA-GAAAATAATGAATGTCAANNN	GgAGAAAATAATGAATGTCAAAGG	1	261535932	-	1	1
	0	DNA	G-AGAAAATAATGAATGTCAANNN	aGAGAAAAaAATGAtTGTCAATGG	1	39635075	-	3	1
	0	DNA	G-AGAAAATAATGAATGTCAANNN	GGAGAAAATAATttAgGTCAAGAG	1	64832050	+	3	1
	0	DNA	G-AGAAAATAATGAATGTCAANNN	GAAGtAcATAATGAATGTtAAAGG	1	32296350	+	3	1
	0	DNA	G-AGAAAATAATGAATGTCAANNN	GGAGtAAATAATGtATGTaAAAGG	1	72540213	+	3	1
	0	DNA	G-AGAAAATAATGAATGTCAANNN	GGAGAAcATAATtAATGTCAATGG	1	61425491	-	2	1
	0	DNA	G-AGAAAATAATGAATGTCAANNN	tTAGAAAATAATcAATGTaAAGGG	1	91446444	+	3	1
	0	DNA	G-AGAAAATAATGAATGTCAANNN	aAAGAAAATAcTGAATtTCAATAG	1	118714482	-	3	1
	0	DNA	G-AGAAAATAATGAATGTCAANNN	tTAGAAAATAATaAATGTCAAAAG	1	19738886	+	2	1
	0	DNA	G-AGAAAATAATGAATGTCAANNN	GAAGAAAATAATaAATGTaAgAAG	1	152365592	-	3	1
	0	DNA	G-AGAAAATAATGAATGTCAANNN	GTAGAAgATAAaGcATGTCAAAGG	1	194241899	-	3	1
	0	DNA	G-AGAAAATAATGAATGTCAANNN	GAAGAAAATAATGgAgGTaAAAGG	1	193338224	+	3	1
	0	DNA	G-AGAAAATAATGAATGTCAANNN	tGAaAAAATAATGAATGaCAAGAG	1	217969264	-	3	1
	0	DNA	G-AGAAAATAATGAATGTCAANNN	GGAaAAAATAATGAATaTCAtGAG	1	183172251	-	3	1
	0	DNA	G-AGAAAATAATGAATGTCAANNN	GGAGAAAATAATGAATGTCAAAGG	1	261535932	-	0	1
	0	DNA	G-AGAAAATAATGAATGTCAANNN	GTAGAtAATAATGAAgaTCAATAG	1	269333327	-	3	1
	0	X	GAGAAAATAATGAATGTCAANNN	GAGAAAAaAATGAtTGTCAATGG	1	39635076	-	2	0
	0	X	GAGAAAATAATGAATGTCAANNN	GAGAAAATAATttAgGTCAAGAG	1	64832051	+	3	0
	0	X	GAGAAAATAATGAATGTCAANNN	GAGAAAtgAATGAATGaCAAGAG	1	66603412	-	3	0
	0	X	GAGAAAATAATGAATGTCAANNN	GAGAAAAaAATGAATtTaAATGG	1	67495988	+	3	0
	0	X	GAGAAAATAATGAATGTCAANNN	GAcAAAATtATaAATGTCAAAGG	1	24595756	-	3	0
	0	X	GAGAAAATAATGAATGTCAANNN	GAGtAAATAATGtATGTaAAAGG	1	72540214	+	3	0
	0	X	GAGAAAATAATGAATGTCAANNN	tAGAAAATAATcAATGTaAAGGG	1	91446445	+	3	0
	0	X	GAGAAAATAATGAATGTCAANNN	GAGAAcATAATtAATGTCAATGG	1	61425492	-	2	0
	0	X	GAGAAAATAATGAATGTCAANNN	GAGAAAAgAATGAATtTCtAGAG	1	61478735	-	3	0
	0	X	GAGAAAATAATGAATGTCAANNN	aAGAAAATAcTGAATtTCAATAG	1	118714483	-	3	0
	0	X	GAGAAAATAATGAATGTCAANNN	GAGAAAATAtTGAATcTgAAAGG	1	124277639	+	3	0
	0	X	GAGAAAATAATGAATGTCAANNN	tAGAAAATAATaAATGTCAAAAG	1	19738887	+	2	0
	0	X	GAGAAAATAATGAATGTCAANNN	GAGAAAATAtTGtATGTCAtCAG	1	208085755	-	3	0
	0	X	GAGAAAATAATGAATGTCAANNN	GAaAAAATAATGAATGaCAAGAG	1	217969265	-	2	0
	0	X	GAGAAAATAATGAATGTCAANNN	GAaAAAATAATGAATaTCAtGAG	1	183172252	-	3	0
	0	X	GAGAAAATAATGAATGTCAANNN	GAtAAAATAATagATGTCAATAG	1	225051514	-	3	0
	0	X	GAGAAAATAATGAATGTCAANNN	GAGAAAATAATGAATGTCAAAGG	1	261535933	-	0	0
	0	RNA	GAGAAAATAATGAATGTCAANNN	#NAME?	1	35449264	+	3	1
	0	RNA	GAGAAAATAATGAATGTCAANNN	#NAME?	1	34565985	+	3	1
	0	RNA	GAGAAAATAATGAATGTCAANNN	#NAME?	1	39873506	-	3	1
	0	RNA	GAGAAAATAATGAATGTCAANNN	#NAME?	1	39635077	-	2	1
	0	RNA	GAGAAAATAATGAATGTCAANNN	#NAME?	1	64832052	+	3	1
	0	RNA	GAGAAAATAATGAATGTCAANNN	#NAME?	1	66603413	-	3	1
	0	RNA	GAGAAAATAATGAATGTCAANNN	#NAME?	1	67495989	+	3	1
	0	RNA	GAGAAAATAATGAATGTCAANNN	#NAME?	1	24595757	-	3	1
	0	RNA	GAGAAAATAATGAATGTCAANNN	#NAME?	1	25439948	+	3	1
	0	RNA	GAGAAAATAATGAATGTCAANNN	#NAME?	1	3957836	+	3	1
	0	RNA	GAGAAAATAATGAATGTCAANNN	#NAME?	1	30866259	+	3	1
	0	RNA	GAGAAAATAATGAATGTCAANNN	#NAME?	1	84811142	+	3	1
	0	RNA	GAGAAAATAATGAATGTCAANNN	#NAME?	1	32296352	+	3	1
	0	RNA	GAGAAAATAATGAATGTCAANNN	#NAME?	1	72540215	+	3	1
	0	RNA	GAGAAAATAATGAATGTCAANNN	#NAME?	1	60277832	+	3	1
	0	RNA	GAGAAAATAATGAATGTCAANNN	#NAME?	1	85527533	+	3	1
	0	RNA	GAGAAAATAATGAATGTCAANNN	#NAME?	1	59710412	+	3	1
	0	RNA	GAGAAAATAATGAATGTCAANNN	#NAME?	1	61425493	-	2	1
	0	RNA	GAGAAAATAATGAATGTCAANNN	#NAME?	1	91446446	+	2	1
	0	RNA	GAGAAAATAATGAATGTCAANNN	#NAME?	1	61478736	-	3	1
	0	RNA	GAGAAAATAATGAATGTCAANNN	#NAME?	1	107536368	+	3	1
	0	RNA	GAGAAAATAATGAATGTCAANNN	#NAME?	1	94269464	+	3	1
	0	RNA	GAGAAAATAATGAATGTCAANNN	#NAME?	1	49268081	+	3	1
	0	RNA	GAGAAAATAATGAATGTCAANNN	#NAME?	1	99254653	+	3	1
	0	RNA	GAGAAAATAATGAATGTCAANNN	#NAME?	1	8381694	-	3	1
	0	RNA	GAGAAAATAATGAATGTCAANNN	#NAME?	1	38900772	+	3	1
	0	RNA	GAGAAAATAATGAATGTCAANNN	#NAME?	1	50321909	-	3	1
	0	RNA	GAGAAAATAATGAATGTCAANNN	#NAME?	1	118714484	-	2	1
	0	RNA	GAGAAAATAATGAATGTCAANNN	#NAME?	1	134741579	+	3	1
	0	RNA	GAGAAAATAATGAATGTCAANNN	#NAME?	1	124277640	+	3	1
	0	RNA	GAGAAAATAATGAATGTCAANNN	#NAME?	1	20773321	+	3	1
	0	RNA	GAGAAAATAATGAATGTCAANNN	#NAME?	1	19738888	+	1	1
	0	RNA	GAGAAAATAATGAATGTCAANNN	#NAME?	1	142073771	+	3	1
	0	RNA	GAGAAAATAATGAATGTCAANNN	#NAME?	1	95136063	+	3	1
	0	RNA	GAGAAAATAATGAATGTCAANNN	#NAME?	1	109229860	+	3	1
	0	RNA	GAGAAAATAATGAATGTCAANNN	#NAME?	1	109132145	-	3	1
	0	RNA	GAGAAAATAATGAATGTCAANNN	#NAME?	1	152365594	-	3	1
	0	RNA	GAGAAAATAATGAATGTCAANNN	#NAME?	1	158403788	-	3	1
	0	RNA	GAGAAAATAATGAATGTCAANNN	#NAME?	1	174075784	+	3	1
	0	RNA	GAGAAAATAATGAATGTCAANNN	#NAME?	1	159136579	-	3	1
	0	RNA	GAGAAAATAATGAATGTCAANNN	#NAME?	1	117478891	-	3	1
	0	RNA	GAGAAAATAATGAATGTCAANNN	#NAME?	1	122527131	+	3	1
	0	RNA	GAGAAAATAATGAATGTCAANNN	#NAME?	1	155068412	-	3	1
	0	RNA	GAGAAAATAATGAATGTCAANNN	#NAME?	1	192055219	-	3	1
	0	RNA	GAGAAAATAATGAATGTCAANNN	#NAME?	1	148506403	-	3	1
	0	RNA	GAGAAAATAATGAATGTCAANNN	#NAME?	1	194241901	-	3	1
	0	RNA	GAGAAAATAATGAATGTCAANNN	#NAME?	1	170920098	+	3	1
	0	RNA	GAGAAAATAATGAATGTCAANNN	#NAME?	1	193338226	+	3	1
	0	RNA	GAGAAAATAATGAATGTCAANNN	#NAME?	1	150221027	-	3	1
	0	RNA	GAGAAAATAATGAATGTCAANNN	#NAME?	1	208085756	-	3	1
	0	RNA	GAGAAAATAATGAATGTCAANNN	#NAME?	1	210079067	-	3	1
	0	RNA	GAGAAAATAATGAATGTCAANNN	#NAME?	1	176113887	-	3	1
	0	RNA	GAGAAAATAATGAATGTCAANNN	#NAME?	1	211969199	+	3	1
	0	RNA	GAGAAAATAATGAATGTCAANNN	#NAME?	1	211148122	+	3	1
	0	RNA	GAGAAAATAATGAATGTCAANNN	#NAME?	1	217969266	-	2	1
	0	RNA	GAGAAAATAATGAATGTCAANNN	#NAME?	1	220200647	-	3	1
	0	RNA	GAGAAAATAATGAATGTCAANNN	#NAME?	1	199720011	+	3	1
	0	RNA	GAGAAAATAATGAATGTCAANNN	#NAME?	1	183172253	-	3	1
	0	RNA	GAGAAAATAATGAATGTCAANNN	#NAME?	1	199513752	+	3	1
	0	RNA	GAGAAAATAATGAATGTCAANNN	#NAME?	1	225051515	-	3	1
	0	RNA	GAGAAAATAATGAATGTCAANNN	#NAME?	1	242360965	-	3	1
	0	RNA	GAGAAAATAATGAATGTCAANNN	#NAME?	1	234264120	-	3	1
	0	RNA	GAGAAAATAATGAATGTCAANNN	#NAME?	1	246589613	-	3	1
	0	RNA	GAGAAAATAATGAATGTCAANNN	#NAME?	1	245460438	-	3	1
	0	RNA	GAGAAAATAATGAATGTCAANNN	#NAME?	1	252990678	-	3	1
	0	RNA	GAGAAAATAATGAATGTCAANNN	#NAME?	1	261535934	-	0	1
	0	RNA	GAGAAAATAATGAATGTCAANNN	#NAME?	1	261639990	-	3	1
	0	RNA	GAGAAAATAATGAATGTCAANNN	#NAME?	1	269333329	-	3	1
	0	RNA	GAGAAAATAATGAATGTCAANNN	GA-AtAATgATGAATGTaAATAG	1	34650812	-	3	1
	0	RNA	GAGAAAATAATGAATGTCAANNN	GA-AAAtTAcTGAATGcCAACAG	1	61871077	+	3	1
	0	RNA	GAGAAAATAATGAATGTCAANNN	GA-AAAATAAaGAATtTtAATAG	1	41024767	-	3	1
	0	RNA	GAGAAAATAATGAATGTCAANNN	GA-AAAAgAAgGAATcTCAACAG	1	520740	+	3	1
	0	RNA	GAGAAAATAATGAATGTCAANNN	tA-AAAtTAATtAATGTCAATGG	1	15685427	+	3	1
	0	RNA	GAGAAAATAATGAATGTCAANNN	GA-AAAtTAgTGAAaGTCAATGG	1	24111180	-	3	1
	0	RNA	GAGAAAATAATGAATGTCAANNN	GA-AAAATAATtgATGTaAACAG	1	23744131	-	3	1
	0	RNA	GAGAAAATAATGAATGTCAANNN	GA-AAAATAAaGtATcTCAAAAG	1	74144145	+	3	1
	0	RNA	GAGAAAATAATGAATGTCAANNN	GA-AAAATAAgGAATGTttATAG	1	73697665	-	3	1
	0	RNA	GAGAAAATAATGAATGTCAANNN	GA-gAAATAATGAtTaTCAAGGG	1	78618914	-	3	1
	0	RNA	GAGAAAATAATGAATGTCAANNN	tA-AAAATAATaAAaGTCAAAAG	1	75116003	-	3	1
	0	RNA	GAGAAAATAATGAATGTCAANNN	GA-AAAAaAtTGAATGTCAcTGG	1	4453076	+	3	1
	0	RNA	GAGAAAATAATGAATGTCAANNN	GA-AAAAaAATGtAaGTCAAGGG	1	81612641	+	3	1
	0	RNA	GAGAAAATAATGAATGTCAANNN	GA-AcAATAATGAAgGTaAAAGG	1	60238844	-	3	1
	0	RNA	GAGAAAATAATGAATGTCAANNN	aA-AAAAaAATGAATGTaAAAGG	1	60277832	+	3	1
	0	RNA	GAGAAAATAATGAATGTCAANNN	tA-AAAATAAgGAATGTCAgGAG	1	96556011	+	3	1
	0	RNA	GAGAAAATAATGAATGTCAANNN	GA-AAAATAATGAtTGcCAATGG	1	94038704	+	2	1
	0	RNA	GAGAAAATAATGAATGTCAANNN	GA-AAAATAATGAATagtAATAG	1	36826761	+	3	1
	0	RNA	GAGAAAATAATGAATGTCAANNN	GA-AAAATAATGAATGTtAAGAG	1	99254653	+	1	1
	0	RNA	GAGAAAATAATGAATGTCAANNN	GA-AAAATAgTGAATGTttATAG	1	123334614	-	3	1
	0	RNA	GAGAAAATAATGAATGTCAANNN	GA-AAAATAATGAtTtTtAAAGG	1	38667967	-	3	1
	0	RNA	GAGAAAATAATGAATGTCAANNN	tA-tAAATAATaAATGTCAAGAG	1	134438014	-	3	1
	0	RNA	GAGAAAATAATGAATGTCAANNN	GA-AAAATAATtAATGTaAAAAG	1	83948212	+	2	1
	0	RNA	GAGAAAATAATGAATGTCAANNN	GA-AAAAaAAaGAATGgCAATGG	1	10390512	-	3	1
	0	RNA	GAGAAAATAATGAATGTCAANNN	ag-AAAATAATaAATGTCAAAAG	1	19738888	+	3	1
	0	RNA	GAGAAAATAATGAATGTCAANNN	GA-AAAAgAATGAAaGTaAAAAG	1	135568223	+	3	1
	0	RNA	GAGAAAATAATGAATGTCAANNN	GA-AAAATAgTaAATcTCAACGG	1	136121924	-	3	1
	0	RNA	GAGAAAATAATGAATGTCAANNN	Gc-AAAAgAATGAATcTCAATAG	1	110445946	+	3	1
	0	RNA	GAGAAAATAATGAATGTCAANNN	GA-AAAATAATGAAaGTacAAAG	1	114412335	+	3	1
	0	RNA	GAGAAAATAATGAATGTCAANNN	GA-AAAAaAATGAAaGTCAcTGG	1	109888553	+	3	1
	0	RNA	GAGAAAATAATGAATGTCAANNN	cA-AAAATAtaGAATGTCAATAG	1	152646306	+	3	1
	0	RNA	GAGAAAATAATGAATGTCAANNN	GA-AAAAaAATGAATtTCAgTAG	1	158555470	-	3	1
	0	RNA	GAGAAAATAATGAATGTCAANNN	cA-AAtATAATGAATGTgAAAAG	1	122359712	+	3	1
	0	RNA	GAGAAAATAATGAATGTCAANNN	aA-AAAAaAATGAATGTgAAGAG	1	159136579	-	3	1
	0	RNA	GAGAAAATAATGAATGTCAANNN	GA-AgAATAATGAATcaCAAAGG	1	175525084	-	3	1
	0	RNA	GAGAAAATAATGAATGTCAANNN	aA-AAAATAcTGtATGTCAAGGG	1	155068412	-	3	1
	0	RNA	GAGAAAATAATGAATGTCAANNN	GA-AAAgaAATGAATGaCAAAAG	1	196732180	-	3	1
	0	RNA	GAGAAAATAATGAATGTCAANNN	GA-AgAATAAaGAATtTCAAAGG	1	196653168	-	3	1
	0	RNA	GAGAAAATAATGAATGTCAANNN	GA-AgAAaAATaAATGTCAAGAG	1	149408412	+	3	1
	0	RNA	GAGAAAATAATGAATGTCAANNN	Gg-AAAAcAATaAATGTCAAAGG	1	170920098	+	3	1
	0	RNA	GAGAAAATAATGAATGTCAANNN	Gg-AAAAaAATGAATGTgAAAGG	1	176113887	-	3	1
	0	RNA	GAGAAAATAATGAATGTCAANNN	GA-AAAATAATtAATGaaAAAAG	1	212688911	+	3	1
	0	RNA	GAGAAAATAATGAATGTCAANNN	aA-AAAATtATGAATGTgAAAAG	1	211148122	+	3	1
	0	RNA	GAGAAAATAATGAATGTCAANNN	GA-AAAAaAATtAATtTCAATAG	1	216588698	-	3	1
	0	RNA	GAGAAAATAATGAATGTCAANNN	aA-AAAATAATGAATGaCAAGAG	1	217969266	-	2	1
	0	RNA	GAGAAAATAATGAATGTCAANNN	tA-AAAATAATGAATGaCAAGAG	1	220200647	-	2	1
	0	RNA	GAGAAAATAATGAATGTCAANNN	Gg-AAAATgATtAATGTCAAGAG	1	199720011	+	3	1
	0	RNA	GAGAAAATAATGAATGTCAANNN	aA-AAAATAATGAATaTCAtGAG	1	183172253	-	3	1
	0	RNA	GAGAAAATAATGAATGTCAANNN	GA-cAAATAATaAATGcCAAAAG	1	183987822	-	3	1
	0	RNA	GAGAAAATAATGAATGTCAANNN	GA-AgAAcAATGAATtTCAAAAG	1	222563552	+	3	1
	0	RNA	GAGAAAATAATGAATGTCAANNN	GA-AAAATAAcaAATGcCAATAG	1	184637779	-	3	1
	0	RNA	GAGAAAATAATGAATGTCAANNN	tA-AAAATAATGAcTGTCAcCAG	1	229625188	+	3	1
	0	RNA	GAGAAAATAATGAATGTCAANNN	tA-AAAAgAATtAATGTCAAAGG	1	244810266	+	3	1
	0	RNA	GAGAAAATAATGAATGTCAANNN	aA-AAAAaAATGAATtTCAAAGG	1	242360965	-	3	1
	0	RNA	GAGAAAATAATGAATGTCAANNN	cA-AAAATAATGAATGTtAATGG	1	246589613	-	2	1
	0	RNA	GAGAAAATAATGAATGTCAANNN	GA-AAAAaAATcAATGTCtACAG	1	251757330	+	3	1
	0	RNA	GAGAAAATAATGAATGTCAANNN	GA-AAAATAtTaAATGTtAAAAG	1	249120246	+	3	1
	0	RNA	GAGAAAATAATGAATGTCAANNN	ag-AAAATAATGAATGTCAAAGG	1	261535934	-	2	1
	0	RNA	GAGAAAATAATGAATGTCAANNN	tA-AAAATAATaAATGTCAtAGG	1	264748859	+	3	1
	0	RNA	GAGAAAATAATGAATGTCAANNN	aA-AAAATAATGAATaTgAAAAG	1	261639990	-	3	1
	0	RNA	GAGAAAATAATGAATGTCAANNN	tA-AAAATAATGAATaTgAAGAG	1	253208529	-	3	1
	0	RNA	GAGAAAATAATGAATGTCAANNN	GAGgAAA-AATGAcTGTCAgCAG	1	28723759	+	3	1
	0	RNA	GAGAAAATAATGAATGTCAANNN	aAGAAAA-AATGAATtTtAATAG	1	35427262	+	3	1
	0	RNA	GAGAAAATAATGAATGTCAANNN	GAGAAAA-AAgGAATaTCtAGAG	1	17269413	-	3	1
	0	RNA	GAGAAAATAATGAATGTCAANNN	GtGAAgA-AATGAAaGTCAAGGG	1	12002214	-	3	1
	0	RNA	GAGAAAATAATGAATGTCAANNN	GAGAAAA-AAgGAATGTtAtTAG	1	40102125	-	3	1
	0	RNA	GAGAAAATAATGAATGTCAANNN	GgGAcAA-AATGAAaGTCAAGGG	1	56709229	+	3	1
	0	RNA	GAGAAAATAATGAATGTCAANNN	GAGAAAA-AAaGAATGTatACAG	1	42240471	+	3	1
	0	RNA	GAGAAAATAATGAATGTCAANNN	tAGAAAA-AtTGcATGTCAAAGG	1	65104598	-	3	1
	0	RNA	GAGAAAATAATGAATGTCAANNN	GgGAAtA-AATGAATGTCcAGAG	1	73269977	+	3	1
	0	RNA	GAGAAAATAATGAATGTCAANNN	GAGAAAt-AATGAtTaTCAAGGG	1	78618914	-	3	1
	0	RNA	GAGAAAATAATGAATGTCAANNN	GAGAcAA-AATGAATtTCAAAAG	1	16208029	+	2	1
	0	RNA	GAGAAAATAATGAATGTCAANNN	aAGtAAA-gATGAATGTCAAGGG	1	68654256	+	3	1
	0	RNA	GAGAAAATAATGAATGTCAANNN	GAGAAAA-cATGAATGcaAAAAG	1	66445056	+	3	1
	0	RNA	GAGAAAATAATGAATGTCAANNN	GAaAAAA-AtTGAATGTCAcTGG	1	4453076	+	3	1
	0	RNA	GAGAAAATAATGAATGTCAANNN	GAGAAAA-AATGAAgtTCtAAGG	1	26793855	+	3	1
	0	RNA	GAGAAAATAATGAATGTCAANNN	GAaAAAA-AATGtAaGTCAAGGG	1	81612641	+	3	1
	0	RNA	GAGAAAATAATGAATGTCAANNN	GAGAAAA-AAgGAATGTatATAG	1	90946811	-	3	1
	0	RNA	GAGAAAATAATGAATGTCAANNN	aAaAAAA-AATGAATGTaAAAGG	1	60277832	+	3	1
	0	RNA	GAGAAAATAATGAATGTCAANNN	GAGAAAA-AAgGAATGTatATAG	1	90926852	-	3	1
	0	RNA	GAGAAAATAATGAATGTCAANNN	GAGgAtA-AATGAATGTCAtAGG	1	88456837	+	3	1
	0	RNA	GAGAAAATAATGAATGTCAANNN	GAGAAAA-AATaAATGTCtcTAG	1	102165898	+	3	1
	0	RNA	GAGAAAATAATGAATGTCAANNN	GtGAAAA-AATcAATGcCAATAG	1	97629613	+	3	1
	0	RNA	GAGAAAATAATGAATGTCAANNN	GAGAAAA-AATaAggGTCAAAAG	1	112391920	-	3	1
	0	RNA	GAGAAAATAATGAATGTCAANNN	GAGAAAA-gcTGAATGTaAATGG	1	108064895	+	3	1
	0	RNA	GAGAAAATAATGAATGTCAANNN	aAGAAAA-AcaGAATGTCAAGGG	1	108205114	+	3	1
	0	RNA	GAGAAAATAATGAATGTCAANNN	aAGcAAA-AATGAATGTCAgTAG	1	48880853	+	3	1
	0	RNA	GAGAAAATAATGAATGTCAANNN	GAaAAAt-AATGAATGTtAAGAG	1	99254653	+	3	1
	0	RNA	GAGAAAATAATGAATGTCAANNN	GAGAAAA-AAaGAATcTaAAGGG	1	37107010	+	3	1
	0	RNA	GAGAAAATAATGAATGTCAANNN	tAGAAAA-AATGAATGgaAATGG	1	135161562	-	3	1
	0	RNA	GAGAAAATAATGAATGTCAANNN	GAaAAAA-AAaGAATGgCAATGG	1	10390512	-	3	1
	0	RNA	GAGAAAATAATGAATGTCAANNN	GAGgAAc-AATGAtTGTCAAGAG	1	140382225	-	3	1
	0	RNA	GAGAAAATAATGAATGTCAANNN	GAtAAAA-AATGAATcTaAATAG	1	130400701	-	3	1
	0	RNA	GAGAAAATAATGAATGTCAANNN	GAGAAAA-AATGAATtTgAgGAG	1	121581315	+	3	1
	0	RNA	GAGAAAATAATGAATGTCAANNN	cAGAgAA-AATGAcTGTCAATGG	1	115329956	-	3	1
	0	RNA	GAGAAAATAATGAATGTCAANNN	GtGAAAA-AATGAcTGTaAACAG	1	114355555	-	3	1
	0	RNA	GAGAAAATAATGAATGTCAANNN	GAaAAAA-AATGAAaGTCAcTGG	1	109888553	+	3	1
	0	RNA	GAGAAAATAATGAATGTCAANNN	GAaAAAA-AATGAATtTCAgTAG	1	158555470	-	3	1
	0	RNA	GAGAAAATAATGAATGTCAANNN	aAtAAAA-AATaAATGTCAAAAG	1	154004292	-	3	1
	0	RNA	GAGAAAATAATGAATGTCAANNN	aAaAAAA-AATGAATGTgAAGAG	1	159136579	-	3	1
	0	RNA	GAGAAAATAATGAATGTCAANNN	GAGAAAA-AcTtAATGTtAAGGG	1	117176922	+	3	1
	0	RNA	GAGAAAATAATGAATGTCAANNN	GAGAAcA-AATaAATGTaAATAG	1	191226581	-	3	1
	0	RNA	GAGAAAATAATGAATGTCAANNN	GAagAAA-AATaAATGTCAAGAG	1	149408412	+	3	1
	0	RNA	GAGAAAATAATGAATGTCAANNN	GAGAAgA-AATaAATGTaAAAAG	1	187850110	-	3	1
	0	RNA	GAGAAAATAATGAATGTCAANNN	GAaAAgA-AATGAATGaCAAAAG	1	196732180	-	3	1
	0	RNA	GAGAAAATAATGAATGTCAANNN	GAGAAAA-AATGtATtTaAATAG	1	171513288	+	3	1
	0	RNA	GAGAAAATAATGAATGTCAANNN	GAcAAAA-cATtAATGTCAACAG	1	180684980	+	3	1
	0	RNA	GAGAAAATAATGAATGTCAANNN	aAtAAAA-AATGAATGgCAAAGG	1	172298555	+	3	1
	0	RNA	GAGAAAATAATGAATGTCAANNN	GAGAcAA-AATGAATcTgAAAAG	1	189608682	+	3	1
	0	RNA	GAGAAAATAATGAATGTCAANNN	tAGAAAc-AATGAATGTCcAGAG	1	195410364	-	3	1
	0	RNA	GAGAAAATAATGAATGTCAANNN	GgaAAAA-AATGAATGTgAAAGG	1	176113887	-	3	1
	0	RNA	GAGAAAATAATGAATGTCAANNN	GAGAAAA-AAaGAATGTgAcGAG	1	211986660	-	3	1
	0	RNA	GAGAAAATAATGAATGTCAANNN	GAaAAAA-AATtAATtTCAATAG	1	216588698	-	3	1
	0	RNA	GAGAAAATAATGAATGTCAANNN	tAGAAcA-AATGAATcTCAAAAG	1	214891793	+	3	1
	0	RNA	GAGAAAATAATGAATGTCAANNN	GAGAAAA-AAaaAATGaCAAGAG	1	223655539	-	3	1
	0	RNA	GAGAAAATAATGAATGTCAANNN	tAGAAAc-AAaGAATGTCAAAGG	1	234894225	+	3	1
	0	RNA	GAGAAAATAATGAATGTCAANNN	GAGAAAA-tATGgATGcCAAAGG	1	231722407	+	3	1
	0	RNA	GAGAAAATAATGAATGTCAANNN	aAaAAAA-AATGAATtTCAAAGG	1	242360965	-	3	1
	0	RNA	GAGAAAATAATGAATGTCAANNN	GAGtgcA-AATGAATGTCAAGAG	1	244320052	+	3	1
	0	RNA	GAGAAAATAATGAATGTCAANNN	GAGAAAA-AAaGAATGTatATGG	1	239172541	-	3	1
	0	RNA	GAGAAAATAATGAATGTCAANNN	GAGAAAA-AATGAATGagAATAG	1	243805497	+	2	1
	0	RNA	GAGAAAATAATGAATGTCAANNN	GAaAAAA-AATcAATGTCtACAG	1	251757330	+	3	1
	0	RNA	GAGAAAATAATGAATGTCAANNN	GAGAAAA-AATtAATtTCAcAAG	1	244206745	-	3	1
	0	RNA	GAGAAAATAATGAATGTCAANNN	GAGAAAA-AATGgActTCAAGAG	1	251553752	+	3	1
	0	RNA	GAGAAAATAATGAATGTCAANNN	aAGAAAA-AAaGtATGTCAAAAG	1	253113792	+	3	1
	0	RNA	GAGAAAATAATGAATGTCAANNN	GAGAAAA-AAaGAATGTatACAG	1	259448220	-	3	1
	0	RNA	GAGAAAATAATGAATGTCAANNN	GAGAAAATAA-aAAccTCAAGAG	1	28762199	+	3	1
	0	RNA	GAGAAAATAATGAATGTCAANNN	GAacAAATAA-GAAgGTCAAAAG	1	61723218	-	3	1
	0	RNA	GAGAAAATAATGAATGTCAANNN	GAGAAcATAA-GAAaGTaAAGAG	1	45289812	-	3	1
	0	RNA	GAGAAAATAATGAATGTCAANNN	GAaAAAATtA-aAATGTCAACAG	1	62273725	+	3	1
	0	RNA	GAGAAAATAATGAATGTCAANNN	GAGAAAATAA-tAATtTgAAAAG	1	595017	+	3	1
	0	RNA	GAGAAAATAATGAATGTCAANNN	GtGAAAATAA-GAtTGTCgATGG	1	63222929	+	3	1
	0	RNA	GAGAAAATAATGAATGTCAANNN	GAGAAAATAA-GAATcaCAtTGG	1	63296512	+	3	1
	0	RNA	GAGAAAATAATGAATGTCAANNN	GAGAAAAgAA-tAATGTaAAAAG	1	63934334	+	3	1
	0	RNA	GAGAAAATAATGAATGTCAANNN	GAGAAAAaAA-GAATGTatACAG	1	42240471	+	3	1
	0	RNA	GAGAAAATAATGAATGTCAANNN	tAGAAAgTcA-GAATGTCAATAG	1	42240982	+	3	1
	0	RNA	GAGAAAATAATGAATGTCAANNN	aAGAAAAgAA-GAATGaCAAAGG	1	64666604	-	3	1
	0	RNA	GAGAAAATAATGAATGTCAANNN	aAGAAAATAA-tAAaGTCAATGG	1	69575709	+	3	1
	0	RNA	GAGAAAATAATGAATGTCAANNN	GAGAAAtTAA-aAATGTCtAAAG	1	2715084	-	3	1
	0	RNA	GAGAAAATAATGAATGTCAANNN	GAGAcAAcAA-tAATGTCAAAAG	1	69538790	-	3	1
	0	RNA	GAGAAAATAATGAATGTCAANNN	GAGAAAATAA-aAgTGTCAcTGG	1	5172126	-	3	1
	0	RNA	GAGAAAATAATGAATGTCAANNN	GtGAAAATAA-GAATGTgtACAG	1	75949428	+	3	1
	0	RNA	GAGAAAATAATGAATGTCAANNN	GgtAAAATAA-GAATGTCAcAAG	1	59732551	-	3	1
	0	RNA	GAGAAAATAATGAATGTCAANNN	GAGAAAATAA-aAATtTtAAAAG	1	86226768	-	3	1
	0	RNA	GAGAAAATAATGAATGTCAANNN	GAGAAAATAA-GAtTGTgAgGGG	1	95565876	-	3	1
	0	RNA	GAGAAAATAATGAATGTCAANNN	aAGAAAATAA-GAAaGTCAAGGG	1	59709513	-	2	1
	0	RNA	GAGAAAATAATGAATGTCAANNN	GAGAAtAcAA-GAATGTCcAGAG	1	102037050	-	3	1
	0	RNA	GAGAAAATAATGAATGTCAANNN	aAGAAAAacA-GAATGTCAAGGG	1	108205114	+	3	1
	0	RNA	GAGAAAATAATGAATGTCAANNN	GAGAAAAaAA-GAATcTaAAGGG	1	37107010	+	3	1
	0	RNA	GAGAAAATAATGAATGTCAANNN	GAGAAAAgAA-GAAaGTgAAGAG	1	8657097	-	3	1
	0	RNA	GAGAAAATAATGAATGTCAANNN	GAGAAAgTgA-GAATGTaAAAGG	1	128831685	-	3	1
	0	RNA	GAGAAAATAATGAATGTCAANNN	GAaAAAAaAA-GAATGgCAATGG	1	10390512	-	3	1
	0	RNA	GAGAAAATAATGAATGTCAANNN	GAtAAAATAA-GAgaGTCAAAGG	1	118782404	+	3	1
	0	RNA	GAGAAAATAATGAATGTCAANNN	GAGAAAAgAA-GAAacTCAAGGG	1	10928403	-	3	1
	0	RNA	GAGAAAATAATGAATGTCAANNN	GAGAAcATAA-GAATaTgAAAGG	1	140587157	+	3	1
	0	RNA	GAGAAAATAATGAATGTCAANNN	GAGtAAATAA-GAATGcCAtAAG	1	135635374	-	3	1
	0	RNA	GAGAAAATAATGAATGTCAANNN	tgGAAAATAA-GAATaTCAAGGG	1	21470563	-	3	1
	0	RNA	GAGAAAATAATGAATGTCAANNN	GAaAAAATAA-GAtaGTCAAAAG	1	136155110	-	3	1
	0	RNA	GAGAAAATAATGAATGTCAANNN	aAGAAAATAA-GAATtaCAAGAG	1	20925679	-	3	1
	0	RNA	GAGAAAATAATGAATGTCAANNN	GAGAAgATAA-GgtTGTCAATAG	1	141005085	-	3	1
	0	RNA	GAGAAAATAATGAATGTCAANNN	GAGAAAATAA-cAATaTaAATAG	1	105523740	-	3	1
	0	RNA	GAGAAAATAATGAATGTCAANNN	GAGAAAAgAA-GAATGgaAATAG	1	153240448	-	3	1
	0	RNA	GAGAAAATAATGAATGTCAANNN	GAGAAAATAA-aAATcaCAAGGG	1	163583307	+	3	1
	0	RNA	GAGAAAATAATGAATGTCAANNN	GAGAAAATAA-GAAaGaaAAGAG	1	173754461	+	3	1
	0	RNA	GAGAAAATAATGAATGTCAANNN	GAaAAAATAA-tAATGTgAAAAG	1	153279992	+	3	1
	0	RNA	GAGAAAATAATGAATGTCAANNN	GAGgAAATAA-tAATtTCAAAAG	1	117130525	-	3	1
	0	RNA	GAGAAAATAATGAATGTCAANNN	aAGAAAATgA-GAAaGTCAAAAG	1	159219427	-	3	1
	0	RNA	GAGAAAATAATGAATGTCAANNN	GAGAAAATAc-aAATGgCAAAAG	1	159741838	-	3	1
	0	RNA	GAGAAAATAATGAATGTCAANNN	GAGAAAATcA-atATGTCAACAG	1	179548873	-	3	1
	0	RNA	GAGAAAATAATGAATGTCAANNN	GAGAAAATgA-aAAcGTCAAGAG	1	139264176	+	3	1
	0	RNA	GAGAAAATAATGAATGTCAANNN	aAGAAAATAA-GAATtTtAAAAG	1	133586957	+	3	1
	0	RNA	GAGAAAATAATGAATGTCAANNN	GAaAAAATAA-tAAaGTCAAAGG	1	201742381	+	3	1
	0	RNA	GAGAAAATAATGAATGTCAANNN	GAcAAAgTAA-GAATtTCAACAG	1	190464587	+	3	1
	0	RNA	GAGAAAATAATGAATGTCAANNN	GAGAAAATAA-aAtTGTtAAGAG	1	188724222	-	3	1
	0	RNA	GAGAAAATAATGAATGTCAANNN	GAGAAAATAA-GAATaTgAAGAG	1	134190285	-	2	1
	0	RNA	GAGAAAATAATGAATGTCAANNN	GAGAAAATgA-tAtTGTCAAAGG	1	203249010	-	3	1
	0	RNA	GAGAAAATAATGAATGTCAANNN	aAGAAAATAA-GtATGTCAgAGG	1	203156057	-	3	1
	0	RNA	GAGAAAATAATGAATGTCAANNN	GAcAtAATAA-GAATGgCAAAAG	1	179916615	+	3	1
	0	RNA	GAGAAAATAATGAATGTCAANNN	GAGAAAATAA-atAgGTCAAGGG	1	197371644	+	3	1
	0	RNA	GAGAAAATAATGAATGTCAANNN	GAaAAAATgA-GAATGTCAACAG	1	208361621	-	2	1
	0	RNA	GAGAAAATAATGAATGTCAANNN	GAGAtAATAA-GAATaTgAATAG	1	205345317	-	3	1
	0	RNA	GAGAAAATAATGAATGTCAANNN	agGAAAATAA-GAATGTaAATGG	1	210986443	-	3	1
	0	RNA	GAGAAAATAATGAATGTCAANNN	tAGAAAATAA-GcATGTgAAAAG	1	171832187	-	3	1
	0	RNA	GAGAAAATAATGAATGTCAANNN	GAaAtAATAA-GAATGgCAAAAG	1	177000716	-	3	1
	0	RNA	GAGAAAATAATGAATGTCAANNN	GAGAAAAaAA-GAATGTgAcGAG	1	211986660	-	3	1
	0	RNA	GAGAAAATAATGAATGTCAANNN	tAGAAAATcA-GAATGcCAAGGG	1	199671172	-	3	1
	0	RNA	GAGAAAATAATGAATGTCAANNN	GAGAAAAaAA-aAATGaCAAGAG	1	223655539	-	3	1
	0	RNA	GAGAAAATAATGAATGTCAANNN	GAcAAAATAA-aAATGgCAAAGG	1	223689874	+	3	1
	0	RNA	GAGAAAATAATGAATGTCAANNN	GAGAAAATAt-GgATGcCAAAGG	1	231722407	+	3	1
	0	RNA	GAGAAAATAATGAATGTCAANNN	GAGAAAAgAA-GtATtTCAAAAG	1	234178067	+	3	1
	0	RNA	GAGAAAATAATGAATGTCAANNN	GAGAAAATAA-tAATtTgAAAAG	1	233902443	+	3	1
	0	RNA	GAGAAAATAATGAATGTCAANNN	tAGAAAcaAA-GAATGTCAAAGG	1	234894225	+	3	1
	0	RNA	GAGAAAATAATGAATGTCAANNN	GAGAAAAaAA-GAATGTatATGG	1	239172541	-	3	1
	0	RNA	GAGAAAATAATGAATGTCAANNN	aAGAAgATAA-GAATGTCAACAG	1	243066061	-	2	1
	0	RNA	GAGAAAATAATGAATGTCAANNN	GAGAAAATAA-ccATGTCAATGG	1	246981555	-	2	1
	0	RNA	GAGAAAATAATGAATGTCAANNN	GAGAAAcTAA-GAATtTaAACAG	1	253793653	-	3	1
	0	RNA	GAGAAAATAATGAATGTCAANNN	GtGAAAATAA-cAATGTCAgCAG	1	251594605	+	3	1
	0	RNA	GAGAAAATAATGAATGTCAANNN	aAGAAAAaAA-GtATGTCAAAAG	1	253113792	+	3	1
	0	RNA	GAGAAAATAATGAATGTCAANNN	GAGAAAAaAA-GAATGTatACAG	1	259448220	-	3	1
	0	RNA	GAGAAAATAATGAATGTCAANNN	GAGAAAATcAT-AATtTgAAAAG	1	50638638	-	3	1
	0	RNA	GAGAAAATAATGAATGTCAANNN	GAGAAAATAAa-AAccTCAAGAG	1	28762199	+	3	1
	0	RNA	GAGAAAATAATGAATGTCAANNN	aAGAAAAgAAT-AATtTCAAAAG	1	22460071	+	3	1
	0	RNA	GAGAAAATAATGAATGTCAANNN	tAtAAAATAAT-AATGcCAAAAG	1	34165146	+	3	1
	0	RNA	GAGAAAATAATGAATGTCAANNN	GAcAAtATAAT-AATaTCAAGAG	1	46302126	+	3	1
	0	RNA	GAGAAAATAATGAATGTCAANNN	GAGAAAATAAT-AATtTgAAAAG	1	595017	+	2	1
	0	RNA	GAGAAAATAATGAATGTCAANNN	GAaAAAATtAa-AATGTCAACAG	1	62273725	+	3	1
	0	RNA	GAGAAAATAATGAATGTCAANNN	GAGAAAAgAAT-AATGTaAAAAG	1	63934334	+	2	1
	0	RNA	GAGAAAATAATGAATGTCAANNN	aAGAtAATAAT-AATGTaAACAG	1	22984278	-	3	1
	0	RNA	GAGAAAATAATGAATGTCAANNN	GAGAAAATAAT-cATGaaAAAAG	1	12932523	+	3	1
	0	RNA	GAGAAAATAATGAATGTCAANNN	GAGAAAtTAAT-AATacCAAAGG	1	14283927	+	3	1
	0	RNA	GAGAAAATAATGAATGTCAANNN	GAGAAAAcAAT-AATtTgAAAAG	1	47113128	+	3	1
	0	RNA	GAGAAAATAATGAATGTCAANNN	GAGAAAATtAT-AATtTgAAAAG	1	24775487	+	3	1
	0	RNA	GAGAAAATAATGAATGTCAANNN	GAaAtAATAAT-AATGaCAAGGG	1	79110190	+	3	1
	0	RNA	GAGAAAATAATGAATGTCAANNN	aAGAAAATAAT-AAaGTCAATGG	1	69575709	+	2	1
	0	RNA	GAGAAAATAATGAATGTCAANNN	GAGAAAtTAAa-AATGTCtAAAG	1	2715084	-	3	1
	0	RNA	GAGAAAATAATGAATGTCAANNN	GAGAcAAcAAT-AATGTCAAAAG	1	69538790	-	2	1
	0	RNA	GAGAAAATAATGAATGTCAANNN	GAGAAAATAAT-AAaGaaAAAGG	1	74841518	-	3	1
	0	RNA	GAGAAAATAATGAATGTCAANNN	GAGAAAATAAa-AgTGTCAcTGG	1	5172126	-	3	1
	0	RNA	GAGAAAATAATGAATGTCAANNN	GAGAAAAccAT-AATGTaAAAAG	1	89834194	+	3	1
	0	RNA	GAGAAAATAATGAATGTCAANNN	GAGAAAATAtT-AATGatAAAAG	1	76297579	+	3	1
	0	RNA	GAGAAAATAATGAATGTCAANNN	GAGAAAATAAa-AATtTtAAAAG	1	86226768	-	3	1
	0	RNA	GAGAAAATAATGAATGTCAANNN	GAGAgAATAAT-AAaGTtAATGG	1	91263615	+	3	1
	0	RNA	GAGAAAATAATGAATGTCAANNN	GAGAgAAaAAT-cATGTCAAAAG	1	59941502	+	3	1
	0	RNA	GAGAAAATAATGAATGTCAANNN	aAGAAAATAAg-AAaGTCAAGGG	1	59709513	-	3	1
	0	RNA	GAGAAAATAATGAATGTCAANNN	GAGAAAAcAAT-AATtTgAAAAG	1	102364776	+	3	1
	0	RNA	GAGAAAATAATGAATGTCAANNN	GAGAAAATAAT-AATtcaAAAAG	1	60682383	-	3	1
	0	RNA	GAGAAAATAATGAATGTCAANNN	aAGAAAAgAAT-AATcTCAACAG	1	59501228	+	3	1
	0	RNA	GAGAAAATAATGAATGTCAANNN	GAGAAAATcAT-AATtTgAAAAG	1	61396353	+	3	1
	0	RNA	GAGAAAATAATGAATGTCAANNN	GAGAAAATcAT-AATtTgAAAAG	1	112435834	+	3	1
	0	RNA	GAGAAAATAATGAATGTCAANNN	GtcAAAATAAT-AATGTCAgTAG	1	112971612	-	3	1
	0	RNA	GAGAAAATAATGAATGTCAANNN	aAGAAAATAgT-AATGTaAAAAG	1	37864048	-	3	1
	0	RNA	GAGAAAATAATGAATGTCAANNN	GAGAAAATtAT-AATtTaAAAAG	1	77887300	-	3	1
	0	RNA	GAGAAAATAATGAATGTCAANNN	GAGAAAATcAT-AATtTgAAAAG	1	38219005	-	3	1
	0	RNA	GAGAAAATAATGAATGTCAANNN	GAcAAgATAAT-AAcGTCAAGAG	1	82577550	-	3	1
	0	RNA	GAGAAAATAATGAATGTCAANNN	GAGAAAATcAT-AATtTgAAAAG	1	38571612	+	3	1
	0	RNA	GAGAAAATAATGAATGTCAANNN	tAGAAAATAAT-AATGagAAAAG	1	124253645	-	3	1
	0	RNA	GAGAAAATAATGAATGTCAANNN	GAGAAAATgAT-AATtTgAAAAG	1	135259085	+	3	1
	0	RNA	GAGAAAATAATGAATGTCAANNN	aAGAAAAaAAT-AATGTCAcTGG	1	19836599	-	3	1
	0	RNA	GAGAAAATAATGAATGTCAANNN	tAaAAAATAAT-AATGaCAAAAG	1	125218951	+	3	1
	0	RNA	GAGAAAATAATGAATGTCAANNN	GAGAAAATgAT-AATtTgAAAAG	1	141240519	+	3	1
	0	RNA	GAGAAAATAATGAATGTCAANNN	GAGAAAtTAAT-AATtTCcAAAG	1	126818527	+	3	1
	0	RNA	GAGAAAATAATGAATGTCAANNN	GAGAAtATAAT-AggGTCAATAG	1	126601063	-	3	1
	0	RNA	GAGAAAATAATGAATGTCAANNN	GAGAAAATcAT-AATtTgAAAAG	1	121011969	-	3	1
	0	RNA	GAGAAAATAATGAATGTCAANNN	GAGAAAATcAT-AATtTgAAAAG	1	21172772	-	3	1
	0	RNA	GAGAAAATAATGAATGTCAANNN	GAGAAAATAAT-ggTGTCAgCAG	1	146489485	+	3	1
	0	RNA	GAGAAAATAATGAATGTCAANNN	cAcAAAATAAT-AATGgCAATAG	1	95124098	-	3	1
	0	RNA	GAGAAAATAATGAATGTCAANNN	aAtAAAATAAT-AATGTCcATGG	1	151256525	-	3	1
	0	RNA	GAGAAAATAATGAATGTCAANNN	GAGAAAATAAc-AATaTaAATAG	1	105523740	-	3	1
	0	RNA	GAGAAAATAATGAATGTCAANNN	GAGAAAAccAT-AATtTCAAAAG	1	105908271	-	3	1
	0	RNA	GAGAAAATAATGAATGTCAANNN	GAGAAAATcAT-AATtTgAAAAG	1	110889926	-	3	1
	0	RNA	GAGAAAATAATGAATGTCAANNN	GAGAAAATAAa-AATcaCAAGGG	1	163583307	+	3	1
	0	RNA	GAGAAAATAATGAATGTCAANNN	aAaAAAAaAAT-AATGTCAATAG	1	152193821	+	3	1
	0	RNA	GAGAAAATAATGAATGTCAANNN	GAaAAAATAAT-AATGTgAAAAG	1	153279992	+	2	1
	0	RNA	GAGAAAATAATGAATGTCAANNN	aAGAAAATAAT-AgTGcCAATAG	1	157953808	+	3	1
	0	RNA	GAGAAAATAATGAATGTCAANNN	cAGAAAAaAAT-AATcTCAAAAG	1	154211933	+	3	1
	0	RNA	GAGAAAATAATGAATGTCAANNN	tAaAAAATAAT-AATGTtAAAAG	1	117363990	-	3	1
	0	RNA	GAGAAAATAATGAATGTCAANNN	GAGgAAATAAT-AATtTCAAAAG	1	117130525	-	2	1
	0	RNA	GAGAAAATAATGAATGTCAANNN	GAGAAAATcAT-AATtTgAAAAG	1	143034379	-	3	1
	0	RNA	GAGAAAATAATGAATGTCAANNN	GAGAAAATAca-AATGgCAAAAG	1	159741838	-	3	1
	0	RNA	GAGAAAATAATGAATGTCAANNN	GAGAAAATcAa-tATGTCAACAG	1	179548873	-	3	1
	0	RNA	GAGAAAATAATGAATGTCAANNN	GAaAAcATAAT-AATaTCAATAG	1	154682096	+	3	1
	0	RNA	GAGAAAATAATGAATGTCAANNN	GAGAAAATgAa-AAcGTCAAGAG	1	139264176	+	3	1
	0	RNA	GAGAAAATAATGAATGTCAANNN	GAGAAAATcAT-AATtTaAATAG	1	187013610	+	3	1
	0	RNA	GAGAAAATAATGAATGTCAANNN	GAGAAAATAAg-AATaTgAAGAG	1	134190285	-	3	1
	0	RNA	GAGAAAATAATGAATGTCAANNN	GAaAAAATAAT-AAaGTCAAAGG	1	201742381	+	2	1
	0	RNA	GAGAAAATAATGAATGTCAANNN	GAGAAAATAAa-AtTGTtAAGAG	1	188724222	-	3	1
	0	RNA	GAGAAAATAATGAATGTCAANNN	GAGAAAATgAT-AtTGTCAAAGG	1	203249010	-	2	1
	0	RNA	GAGAAAATAATGAATGTCAANNN	GAGAAAATAAT-AATtctAAAAG	1	189342894	+	3	1
	0	RNA	GAGAAAATAATGAATGTCAANNN	GAGAAAATcAT-AATtTgAAGAG	1	189852684	+	3	1
	0	RNA	GAGAAAATAATGAATGTCAANNN	GAGAAtATAAT-AATtTgAAAAG	1	203015629	-	3	1
	0	RNA	GAGAAAATAATGAATGTCAANNN	GAcAAAAcAtT-AATGTCAACAG	1	180684980	+	3	1
	0	RNA	GAGAAAATAATGAATGTCAANNN	GAGAAAATAAa-tAgGTCAAGGG	1	197371644	+	3	1
	0	RNA	GAGAAAATAATGAATGTCAANNN	aAGAAAATAAT-AAaaTCAAGGG	1	161739096	-	3	1
	0	RNA	GAGAAAATAATGAATGTCAANNN	GAaAAAATgAg-AATGTCAACAG	1	208361621	-	3	1
	0	RNA	GAGAAAATAATGAATGTCAANNN	GAGAAAATAAT-AATtcCtAAGG	1	208051491	+	3	1
	0	RNA	GAGAAAATAATGAATGTCAANNN	GAGccAATAAT-AtTGTCAATAG	1	189116739	+	3	1
	0	RNA	GAGAAAATAATGAATGTCAANNN	GAGAAAATcAT-AATtTgAAAAG	1	173592216	+	3	1
	0	RNA	GAGAAAATAATGAATGTCAANNN	GAGAAAAccAT-AATGTgAAAAG	1	176426869	+	3	1
	0	RNA	GAGAAAATAATGAATGTCAANNN	cttAAAATAAT-AATGTCAAAAG	1	162345857	+	3	1
	0	RNA	GAGAAAATAATGAATGTCAANNN	aAGAAAATAAT-AcTtTCAAAGG	1	198197887	-	3	1
	0	RNA	GAGAAAATAATGAATGTCAANNN	GAGAAAATcAT-AATtTgAAAAG	1	212038743	-	3	1
	0	RNA	GAGAAAATAATGAATGTCAANNN	GAGAAAAccAT-AATGTgAAAAG	1	217082706	+	3	1
	0	RNA	GAGAAAATAATGAATGTCAANNN	GAGAAAATcAT-AATtTgAAAGG	1	177666797	+	3	1
	0	RNA	GAGAAAATAATGAATGTCAANNN	GAGAAAATcAT-AATtTgAAAAG	1	218483644	-	3	1
	0	RNA	GAGAAAATAATGAATGTCAANNN	GAGAAAActAT-AATGcCAAAAG	1	218932341	-	3	1
	0	RNA	GAGAAAATAATGAATGTCAANNN	GAGAAAAaAAa-AATGaCAAGAG	1	223655539	-	3	1
	0	RNA	GAGAAAATAATGAATGTCAANNN	GAcAAAATAAa-AATGgCAAAGG	1	223689874	+	3	1
	0	RNA	GAGAAAATAATGAATGTCAANNN	GAcAAAATAAT-AATtTaAAAAG	1	198761132	-	3	1
	0	RNA	GAGAAAATAATGAATGTCAANNN	GAGAAAATcAT-AATtTgAAAAG	1	228221919	-	3	1
	0	RNA	GAGAAAATAATGAATGTCAANNN	aAGAAAAgAAT-AAaGTCAATAG	1	223946829	+	3	1
	0	RNA	GAGAAAATAATGAATGTCAANNN	GAGAAAcTAAT-AATGTaAtAGG	1	230303780	+	3	1
	0	RNA	GAGAAAATAATGAATGTCAANNN	GAGAAAATAAT-AATtTgAAAAG	1	233902443	+	2	1
	0	RNA	GAGAAAATAATGAATGTCAANNN	GgGAAAATAAT-AAgGTCcAAGG	1	236068892	+	3	1
	0	RNA	GAGAAAATAATGAATGTCAANNN	GAGAAAATcAT-AATtTgAAAAG	1	225550684	+	3	1
	0	RNA	GAGAAAATAATGAATGTCAANNN	aAGAAgATAAg-AATGTCAACAG	1	243066061	-	3	1
	0	RNA	GAGAAAATAATGAATGTCAANNN	GAGAAAATcAT-AATGcaAAAAG	1	240060233	-	3	1
	0	RNA	GAGAAAATAATGAATGTCAANNN	tAGAAAATAAT-AAaGgCAAAAG	1	245920990	+	3	1
	0	RNA	GAGAAAATAATGAATGTCAANNN	GAGAAAATcAT-AATtTaAAAAG	1	200242863	+	3	1
	0	RNA	GAGAAAATAATGAATGTCAANNN	cAGAAAATgAT-AATtTCAAAAG	1	243459779	-	3	1
	0	RNA	GAGAAAATAATGAATGTCAANNN	aAaAAAATAAT-AATGTgAAGAG	1	246722767	-	3	1
	0	RNA	GAGAAAATAATGAATGTCAANNN	GAGAAAATAAc-cATGTCAATGG	1	246981555	-	2	1
	0	RNA	GAGAAAATAATGAATGTCAANNN	GAGAAAAccAT-AATGTgAAAAG	1	247505354	-	3	1
	0	RNA	GAGAAAATAATGAATGTCAANNN	cAGAAAAaAAT-AATtTCAAAAG	1	242816589	-	3	1
	0	RNA	GAGAAAATAATGAATGTCAANNN	GtGAAAATAAc-AATGTCAgCAG	1	251594605	+	3	1
	0	RNA	GAGAAAATAATGAATGTCAANNN	tAGAAAATAAT-AAaGcCAAAAG	1	261094019	+	3	1
	0	RNA	GAGAAAATAATGAATGTCAANNN	cAGAAAAgAAT-cATGTCAACAG	1	262742781	-	3	1
	0	RNA	GAGAAAATAATGAATGTCAANNN	GtaAAAATAAT-AATtTCAAAAG	1	268123883	-	3	1
	0	RNA	GAGAAAATAATGAATGTCAANNN	GAGAAAATAgT-AAaGaCAAGGG	1	259000682	+	3	1
	0	RNA	GAGAAAATAATGAATGTCAANNN	GAaAAAgTAATGAA-tTCAAAAG	1	35679601	-	3	1
	0	RNA	GAGAAAATAATGAATGTCAANNN	aAtAAAATAATGAA-GaCAAAGG	1	23767499	-	3	1
	0	RNA	GAGAAAATAATGAATGTCAANNN	GAGAAAATAtTGAA-GTCAtAGG	1	23780683	+	2	1
	0	RNA	GAGAAAATAATGAATGTCAANNN	GAGAgAAaAATGAA-GTCAgGAG	1	39897886	-	3	1
	0	RNA	GAGAAAATAATGAATGTCAANNN	GAGAtAATAcTGAA-GgCAAAAG	1	41260976	-	3	1
	0	RNA	GAGAAAATAATGAATGTCAANNN	GcGAAtATAtTGAA-GTCAACAG	1	41205275	+	3	1
	0	RNA	GAGAAAATAATGAATGTCAANNN	GAGAAAtTAATGAA-GgCtAGAG	1	15812237	-	3	1
	0	RNA	GAGAAAATAATGAATGTCAANNN	GAaAAAAaAATGAA-GTCAtCAG	1	24771914	+	3	1
	0	RNA	GAGAAAATAATGAATGTCAANNN	GAtAAgATAATGAA-GcCAAAGG	1	67131979	+	3	1
	0	RNA	GAGAAAATAATGAATGTCAANNN	aAGAAAATAATaAA-GTCAATGG	1	69575709	+	2	1
	0	RNA	GAGAAAATAATGAATGTCAANNN	GtGAAAATAAaGAA-GTaAATAG	1	80173715	-	3	1
	0	RNA	GAGAAAATAATGAATGTCAANNN	GAGAAAAaAATGAc-tTCAAAGG	1	57416345	-	3	1
	0	RNA	GAGAAAATAATGAATGTCAANNN	GAGAAAATAcTGcA-GTaAAAAG	1	70495725	+	3	1
	0	RNA	GAGAAAATAATGAATGTCAANNN	GAcAAgATAATGgA-GTCAAAAG	1	31863216	-	3	1
	0	RNA	GAGAAAATAATGAATGTCAANNN	GAGAAAATAATaAA-GaaAAAGG	1	74841518	-	3	1
	0	RNA	GAGAAAATAATGAATGTCAANNN	GAGAAAAaAATGAA-GcCAAAAG	1	71688208	+	2	1
	0	RNA	GAGAAAATAATGAATGTCAANNN	GAtAAAATAATcAA-tTCAAGGG	1	90351686	-	3	1
	0	RNA	GAGAAAATAATGAATGTCAANNN	GAGAgAATAATaAA-GTtAATGG	1	91263615	+	3	1
	0	RNA	GAGAAAATAATGAATGTCAANNN	GAGAAAAcAATGAA-aTCAAAAG	1	101411617	-	2	1
	0	RNA	GAGAAAATAATGAATGTCAANNN	GAGAAAAgAATGAA-GaaAAAAG	1	101625961	-	3	1
	0	RNA	GAGAAAATAATGAATGTCAANNN	aAGAAAATAAgaAA-GTCAAGGG	1	59709513	-	3	1
	0	RNA	GAGAAAATAATGAATGTCAANNN	GAGAgAATAAgGAA-GTCAtGAG	1	102239777	-	3	1
	0	RNA	GAGAAAATAATGAATGTCAANNN	GAGAAAATAAaGgA-GTCAtCAG	1	36949762	+	3	1
	0	RNA	GAGAAAATAATGAATGTCAANNN	GAaAAAATAATGAA-tTaAACAG	1	76696853	+	3	1
	0	RNA	GAGAAAATAATGAATGTCAANNN	GAGgAAATAATGtA-GTtAAAGG	1	54115205	-	3	1
	0	RNA	GAGAAAATAATGAATGTCAANNN	cAGAAAATAATGgA-GTCAcAAG	1	125295050	+	3	1
	0	RNA	GAGAAAATAATGAATGTCAANNN	GAGAAAATAATGAA-tTaAcAGG	1	130346656	-	3	1
	0	RNA	GAGAAAATAATGAATGTCAANNN	GAGAAAAccATGAA-GgCAATAG	1	119622062	-	3	1
	0	RNA	GAGAAAATAATGAATGTCAANNN	GAtAAAATcATGAA-cTCAAAGG	1	130675930	+	3	1
	0	RNA	GAGAAAATAATGAATGTCAANNN	GAGAAAATcATtAA-GgCAAAAG	1	137123131	+	3	1
	0	RNA	GAGAAAATAATGAATGTCAANNN	GAGAAAATAAcGAg-GTaAAAAG	1	146523673	+	3	1
	0	RNA	GAGAAAATAATGAATGTCAANNN	GAcAAAATAtTGcA-GTCAAAAG	1	22133253	+	3	1
	0	RNA	GAGAAAATAATGAATGTCAANNN	GAGAAAATAATGgt-GTCAgCAG	1	146489485	+	3	1
	0	RNA	GAGAAAATAATGAATGTCAANNN	GAGAAAATAAgGAA-aTgAAGAG	1	146590509	+	3	1
	0	RNA	GAGAAAATAATGAATGTCAANNN	GAGAAAAgAcTGAg-GTCAAGAG	1	121829515	-	3	1
	0	RNA	GAGAAAATAATGAATGTCAANNN	tAGAAAATgATGAA-GTCAgGGG	1	115675610	+	3	1
	0	RNA	GAGAAAATAATGAATGTCAANNN	GAGAAAATAATGAA-caCAAGAG	1	143258570	-	2	1
	0	RNA	GAGAAAATAATGAATGTCAANNN	GAGgAAAaAAaGAA-GTCAAAAG	1	158987130	-	3	1
	0	RNA	GAGAAAATAATGAATGTCAANNN	aAaAAAATAgTGAA-GTCAAAAG	1	169155899	-	3	1
	0	RNA	GAGAAAATAATGAATGTCAANNN	GAGAAcATAATGAA-aTCAAAAG	1	139275611	+	2	1
	0	RNA	GAGAAAATAATGAATGTCAANNN	GAGAAcAaAATGAA-GTCtAAAG	1	191367026	-	3	1
	0	RNA	GAGAAAATAATGAATGTCAANNN	GAtAAAATgATGAA-GTCAAGAG	1	186432556	-	2	1
	0	RNA	GAGAAAATAATGAATGTCAANNN	GAaAAAATAATaAA-GTCAAAGG	1	201742381	+	2	1
	0	RNA	GAGAAAATAATGAATGTCAANNN	GAGAtgATAATGAA-aTCAATGG	1	134373111	-	3	1
	0	RNA	GAGAAAATAATGAATGTCAANNN	GAGAAAgTgATGAA-GTCAATAG	1	171844850	+	2	1
	0	RNA	GAGAAAATAATGAATGTCAANNN	GAGAAAATAAatAg-GTCAAGGG	1	197371644	+	3	1
	0	RNA	GAGAAAATAATGAATGTCAANNN	aAGAAAATAATaAA-aTCAAGGG	1	161739096	-	3	1
	0	RNA	GAGAAAATAATGAATGTCAANNN	GAGAAAATAAgGAA-GggAAGAG	1	198086408	+	3	1
	0	RNA	GAGAAAATAATGAATGTCAANNN	cAGtAAAgAATGAA-GTCAATGG	1	156187905	+	3	1
	0	RNA	GAGAAAATAATGAATGTCAANNN	GAGAAAATAAaGcA-aTCAAGAG	1	211117820	-	3	1
	0	RNA	GAGAAAATAATGAATGTCAANNN	GAGgActTAATGAA-GTCAAAAG	1	199121645	+	3	1
	0	RNA	GAGAAAATAATGAATGTCAANNN	GgGAAAATAtTGAA-GaCAATAG	1	178239034	-	3	1
	0	RNA	GAGAAAATAATGAATGTCAANNN	GAGAAAATcATGAA-GgtAAAAG	1	199556570	+	3	1
	0	RNA	GAGAAAATAATGAATGTCAANNN	aAGAAAAgAATaAA-GTCAATAG	1	223946829	+	3	1
	0	RNA	GAGAAAATAATGAATGTCAANNN	GAGAAAAaAATGAA-aTCAgGAG	1	230487526	-	3	1
	0	RNA	GAGAAAATAATGAATGTCAANNN	aAGAAAgaAATGAA-GTCAAAAG	1	231288650	-	3	1
	0	RNA	GAGAAAATAATGAATGTCAANNN	GAGAAAAaAATGAA-GgaAAAAG	1	233900868	+	3	1
	0	RNA	GAGAAAATAATGAATGTCAANNN	GAGAAAATAtTGAA-agCAAAAG	1	240102011	-	3	1
	0	RNA	GAGAAAATAATGAATGTCAANNN	tAGcAAATAATcAA-GTCAAAAG	1	225694278	+	3	1
	0	RNA	GAGAAAATAATGAATGTCAANNN	cAGAAAATAATGAA-GTaAtAAG	1	244733076	-	3	1
	0	RNA	GAGAAAATAATGAATGTCAANNN	tAGAAAATAATaAA-GgCAAAAG	1	245920990	+	3	1
	0	RNA	GAGAAAATAATGAATGTCAANNN	GAGAAtATAAaGAA-GTaAATGG	1	200160034	-	3	1
	0	RNA	GAGAAAATAATGAATGTCAANNN	GAGAAAATAAccAt-GTCAATGG	1	246981555	-	3	1
	0	RNA	GAGAAAATAATGAATGTCAANNN	GAGAAAAaAAaGAA-GTaAATGG	1	249819248	-	3	1
	0	RNA	GAGAAAATAATGAATGTCAANNN	tAGAAAATAATGgA-GTCtAGGG	1	253671466	+	3	1
	0	RNA	GAGAAAATAATGAATGTCAANNN	GAGAAAAaAATGAA-GaCAAAGG	1	256631975	-	2	1
	0	RNA	GAGAAAATAATGAATGTCAANNN	tAGAAAATAATaAA-GcCAAAAG	1	261094019	+	3	1
	0	RNA	GAGAAAATAATGAATGTCAANNN	GAGAAAATAgTaAA-GaCAAGGG	1	259000682	+	3	1
	0	RNA	GAGAAAATAATGAATGTCAANNN	GAGAAAATAATttATG-aAATAG	1	50640924	+	3	1
	0	RNA	GAGAAAATAATGAATGTCAANNN	GAaAAAgTAATGAATt-CAAAAG	1	35679601	-	3	1
	0	RNA	GAGAAAATAATGAATGTCAANNN	GAGAtAATAcTGAAgG-CAAAAG	1	41260976	-	3	1
	0	RNA	GAGAAAATAATGAATGTCAANNN	cAGAAAAcAATGAATG-aAATGG	1	45500024	+	3	1
	0	RNA	GAGAAAATAATGAATGTCAANNN	aAGAAAATAATGAcTG-CAgTGG	1	41133912	+	3	1
	0	RNA	GAGAAAATAATGAATGTCAANNN	aAGAAAAcAATGAATG-CAACAG	1	40780480	-	2	1
	0	RNA	GAGAAAATAATGAATGTCAANNN	GAtcAAATAATaAATG-CAACAG	1	64403218	+	3	1
	0	RNA	GAGAAAATAATGAATGTCAANNN	GAtAAAAcAATGAATG-CAgTGG	1	13283741	+	3	1
	0	RNA	GAGAAAATAATGAATGTCAANNN	GAcAAAATAtTGAATG-tAAGAG	1	13303632	-	3	1
	0	RNA	GAGAAAATAATGAATGTCAANNN	GAGAAAtTAATGAAgG-CtAGAG	1	15812237	-	3	1
	0	RNA	GAGAAAATAATGAATGTCAANNN	GAGAtAATAATGAcTG-CcAGAG	1	68055714	-	3	1
	0	RNA	GAGAAAATAATGAATGTCAANNN	GAGAAAATAtTaAATG-tAAAGG	1	68075558	-	3	1
	0	RNA	GAGAAAATAATGAATGTCAANNN	GAGAAAAaAATGAAaG-aAAAAG	1	24116014	+	3	1
	0	RNA	GAGAAAATAATGAATGTCAANNN	GAGAAAAcAATatATG-CAAAAG	1	25166858	-	3	1
	0	RNA	GAGAAAATAATGAATGTCAANNN	cAGAAAtTAATGAAaG-CAAAAG	1	28883543	-	3	1
	0	RNA	GAGAAAATAATGAATGTCAANNN	GAGAAAAgAATGAAaG-aAAAAG	1	51837161	+	3	1
	0	RNA	GAGAAAATAATGAATGTCAANNN	GgtAAAATAATGAATa-CAAAGG	1	74164441	-	3	1
	0	RNA	GAGAAAATAATGAATGTCAANNN	GAGAAAATtAaGAATG-aAAGAG	1	29920012	-	3	1
	0	RNA	GAGAAAATAATGAATGTCAANNN	GAGAAAAaAATGAcTt-CAAAGG	1	57416345	-	3	1
	0	RNA	GAGAAAATAATGAATGTCAANNN	GAGAAAAaAATGAtTa-CAAAGG	1	25311797	-	3	1
	0	RNA	GAGAAAATAATGAATGTCAANNN	aAGAAAATAcTGAATG-CAtCAG	1	25317830	+	3	1
	0	RNA	GAGAAAATAATGAATGTCAANNN	GAtAAAATAAaGAATG-CcATAG	1	76072944	-	3	1
	0	RNA	GAGAAAATAATGAATGTCAANNN	GAGAAAAaAATGAAgc-CAAAAG	1	71688208	+	3	1
	0	RNA	GAGAAAATAATGAATGTCAANNN	GAtAAAATAATcAATt-CAAGGG	1	90351686	-	3	1
	0	RNA	GAGAAAATAATGAATGTCAANNN	GAGtAAATAATGtATG-tAAAAG	1	72540214	+	3	1
	0	RNA	GAGAAAATAATGAATGTCAANNN	GAGggAATAtTGAATG-CAAAAG	1	59436542	-	3	1
	0	RNA	GAGAAAATAATGAATGTCAANNN	GAGAAAAcAATGAAat-CAAAAG	1	101411617	-	3	1
	0	RNA	GAGAAAATAATGAATGTCAANNN	GAGAAAATAgaGAATG-gAACAG	1	59980714	-	3	1
	0	RNA	GAGAAAATAATGAATGTCAANNN	tAGAAAATAATcAATG-tAAAGG	1	91446445	+	3	1
	0	RNA	GAGAAAATAATGAATGTCAANNN	GAGAAgAaAATGAATG-gAAAAG	1	59191586	+	3	1
	0	RNA	GAGAAAATAATGAATGTCAANNN	GAGAAAATAATtgAaG-CAAAGG	1	48142735	-	3	1
	0	RNA	GAGAAAATAATGAATGTCAANNN	GAaAAAATAATGAATt-aAACAG	1	76696853	+	3	1
	0	RNA	GAGAAAATAATGAATGTCAANNN	GAGAAAATAATGAATt-aAcAGG	1	130346656	-	3	1
	0	RNA	GAGAAAATAATGAATGTCAANNN	GAGAAAAccATGAAgG-CAATAG	1	119622062	-	3	1
	0	RNA	GAGAAAATAATGAATGTCAANNN	GAGAAAtcAATGAATc-CAAAAG	1	120202245	-	3	1
	0	RNA	GAGAAAATAATGAATGTCAANNN	GAGgAAAgAATGAAaG-CAATAG	1	125732083	+	3	1
	0	RNA	GAGAAAATAATGAATGTCAANNN	GAacAAATAATGAATG-tAATGG	1	125041388	-	3	1
	0	RNA	GAGAAAATAATGAATGTCAANNN	GAGAAAATcATtAAgG-CAAAAG	1	137123131	+	3	1
	0	RNA	GAGAAAATAATGAATGTCAANNN	atGgAAATAATGAATG-CAAGAG	1	113835093	-	3	1
	0	RNA	GAGAAAATAATGAATGTCAANNN	tAcAAAATAAaGAATG-CAAAGG	1	22005597	+	3	1
	0	RNA	GAGAAAATAATGAATGTCAANNN	GAtAAcAcAATGAATG-CAAAGG	1	121415253	-	3	1
	0	RNA	GAGAAAATAATGAATGTCAANNN	aAGAAAATAATaAAaG-CAATAG	1	121199653	-	3	1
	0	RNA	GAGAAAATAATGAATGTCAANNN	GAGAAAATtATtAATG-tAATAG	1	152184571	+	3	1
	0	RNA	GAGAAAATAATGAATGTCAANNN	GgGgAAAgAATGAATG-CAATAG	1	158604703	+	3	1
	0	RNA	GAGAAAATAATGAATGTCAANNN	GAGAAAATAATGAAca-CAAGAG	1	143258570	-	2	1
	0	RNA	GAGAAAATAATGAATGTCAANNN	aAGAAAATAtaGAATG-CAAAAG	1	174342620	+	3	1
	0	RNA	GAGAAAATAATGAATGTCAANNN	aAGAAAATAATGAtaG-CAAGAG	1	168690436	+	3	1
	0	RNA	GAGAAAATAATGAATGTCAANNN	GAGAAAAgAAcaAATG-CAATGG	1	139082139	+	3	1
	0	RNA	GAGAAAATAATGAATGTCAANNN	GAGAAAAaAATGtAaG-CAAAGG	1	147432644	-	3	1
	0	RNA	GAGAAAATAATGAATGTCAANNN	GAGAAcATAATGAAat-CAAAAG	1	139275611	+	3	1
	0	RNA	GAGAAAATAATGAATGTCAANNN	GAGAAAAaAAgaAATG-CAATGG	1	191342926	-	3	1
	0	RNA	GAGAAAATAATGAATGTCAANNN	cAGAAAATAATGAATa-CgATAG	1	185504419	-	3	1
	0	RNA	GAGAAAATAATGAATGTCAANNN	GAGAgAAgAAaGAATG-CAATGG	1	192443675	+	3	1
	0	RNA	GAGAAAATAATGAATGTCAANNN	GAGAAAATAATGcATa-CAtCGG	1	148714772	+	3	1
	0	RNA	GAGAAAATAATGAATGTCAANNN	GAGAAAAaAAaGAATG-tAAAGG	1	203740527	-	3	1
	0	RNA	GAGAAAATAATGAATGTCAANNN	GAGgAAATAATGAAaG-CAgGGG	1	204243793	-	3	1
	0	RNA	GAGAAAATAATGAATGTCAANNN	aAGAAAATAATaAATG-gAAGAG	1	210801630	+	3	1
	0	RNA	GAGAAAATAATGAATGTCAANNN	GAGAAAtgAATGtATG-CAAGAG	1	208836541	+	3	1
	0	RNA	GAGAAAATAATGAATGTCAANNN	GAGAAAATAAgGAAgG-gAAGAG	1	198086408	+	3	1
	0	RNA	GAGAAAATAATGAATGTCAANNN	GAGAAcATAgTGAAaG-CAAGAG	1	173413200	-	3	1
	0	RNA	GAGAAAATAATGAATGTCAANNN	aAGAAAATtATGAATG-gAAAAG	1	173107419	+	3	1
	0	RNA	GAGAAAATAATGAATGTCAANNN	GAGAgAAgAAaGAATG-CAATAG	1	189605007	+	3	1
	0	RNA	GAGAAAATAATGAATGTCAANNN	GAGAAAATcATGAAgG-tAAAAG	1	199556570	+	3	1
	0	RNA	GAGAAAATAATGAATGTCAANNN	GAGAAAATAATGAtTG-CtgCAG	1	178034176	+	3	1
	0	RNA	GAGAAAATAATGAATGTCAANNN	GAGAAAtcAATGAATc-CAAGAG	1	220241248	+	3	1
	0	RNA	GAGAAAATAATGAATGTCAANNN	GAGAAAATAgTGAATa-CcAAGG	1	183573367	+	3	1
	0	RNA	GAGAAAATAATGAATGTCAANNN	GAGAcAAaAATGcATG-CAAAAG	1	226434330	+	3	1
	0	RNA	GAGAAAATAATGAATGTCAANNN	GAGAAcATAATaAATG-CcATAG	1	231444187	+	3	1
	0	RNA	GAGAAAATAATGAATGTCAANNN	GAGAAAATAtTaAAaG-CAACAG	1	232641956	-	3	1
	0	RNA	GAGAAAATAATGAATGTCAANNN	aAGAAAATtATGAATG-CAAAAG	1	227269610	+	2	1
	0	RNA	GAGAAAATAATGAATGTCAANNN	GAGAAAAaAATGAAgG-aAAAAG	1	233900868	+	3	1
	0	RNA	GAGAAAATAATGAATGTCAANNN	GAGAAAATtATGAcTG-aAACAG	1	235183710	-	3	1
	0	RNA	GAGAAAATAATGAATGTCAANNN	GAGAAAAcAATGtgTG-CAAAGG	1	240593843	+	3	1
	0	RNA	GAGAAAATAATGAATGTCAANNN	GAGAAAATAtTGAAaG-CAAAAG	1	240102011	-	2	1
	0	RNA	GAGAAAATAATGAATGTCAANNN	tAGAAAATAATaAAgG-CAAAAG	1	245920990	+	3	1
	0	RNA	GAGAAAATAATGAATGTCAANNN	cAGAAAAcAATGAAaG-CAAAGG	1	247015702	-	3	1
	0	RNA	GAGAAAATAATGAATGTCAANNN	GAGAAAATAAacAATG-CAtAAG	1	253586309	-	3	1
	0	RNA	GAGAAAATAATGAATGTCAANNN	GAGAAAATAATGAATG-tcAAAG	1	261535935	-	2	1
	0	RNA	GAGAAAATAATGAATGTCAANNN	GAGAAAAaAATGAAga-CAAAGG	1	256631975	-	3	1
	0	RNA	GAGAAAATAATGAATGTCAANNN	aAGAAAATAtTcAATG-CAAAGG	1	263277457	+	3	1
	0	RNA	GAGAAAATAATGAATGTCAANNN	GAcAAAAcAATGAATG-aAAGAG	1	268107943	-	3	1
	0	RNA	GAGAAAATAATGAATGTCAANNN	GAGAAAATAATttATGa-AATAG	1	50640924	+	3	1
	0	RNA	GAGAAAATAATGAATGTCAANNN	GAGAAgcTAATaAATGT-AACAG	1	39377406	-	3	1
	0	RNA	GAGAAAATAATGAATGTCAANNN	cAGAAAAcAATGAATGa-AATGG	1	45500024	+	3	1
	0	RNA	GAGAAAATAATGAATGTCAANNN	aAGAAAAcAATGAATGc-AACAG	1	40780480	-	3	1
	0	RNA	GAGAAAATAATGAATGTCAANNN	GAcAAAATAtTGAATGT-AAGAG	1	13303632	-	2	1
	0	RNA	GAGAAAATAATGAATGTCAANNN	GAGAgAATAATGAtgGT-AAAGG	1	15547969	-	3	1
	0	RNA	GAGAAAATAATGAATGTCAANNN	GAGAAAATAtTaAATGT-AAAGG	1	68075558	-	2	1
	0	RNA	GAGAAAATAATGAATGTCAANNN	aAGAgAAaAATGAATGT-AAAAG	1	1064832	+	3	1
	0	RNA	GAGAAAATAATGAATGTCAANNN	GAGAAAAaAATGAAaGa-AAAAG	1	24116014	+	3	1
	0	RNA	GAGAAAATAATGAATGTCAANNN	GAGAAtAaAATGAtTGT-AATGG	1	18077834	+	3	1
	0	RNA	GAGAAAATAATGAATGTCAANNN	GAGAAAATAATaAAaaT-AAAAG	1	79098195	-	3	1
	0	RNA	GAGAAAATAATGAATGTCAANNN	aAGAAgATAATGAATGT-tATAG	1	25602625	-	3	1
	0	RNA	GAGAAAATAATGAATGTCAANNN	GAGAAAATtAaGAATGa-AAGAG	1	29920012	-	3	1
	0	RNA	GAGAAAATAATGAATGTCAANNN	GAGAAgATAtTcAATGT-AACAG	1	4118480	+	3	1
	0	RNA	GAGAAAATAATGAATGTCAANNN	GAGAAAAgAATGAAaGa-AAAAG	1	51837161	+	3	1
	0	RNA	GAGAAAATAATGAATGTCAANNN	GAGAAtATAATtAcTGT-AAAAG	1	75773306	+	3	1
	0	RNA	GAGAAAATAATGAATGTCAANNN	GgGAAAATcATcAATGT-AACAG	1	26709662	-	3	1
	0	RNA	GAGAAAATAATGAATGTCAANNN	GAGtAAATAATGtATGT-AAAAG	1	72540214	+	2	1
	0	RNA	GAGAAAATAATGAATGTCAANNN	GAGtAAATAATGAgTtT-AAAAG	1	85441109	+	3	1
	0	RNA	GAGAAAATAATGAATGTCAANNN	GAGcAAATAATaAATGT-AtAGG	1	33021432	+	3	1
	0	RNA	GAGAAAATAATGAATGTCAANNN	cAaAAAAaAATGAATGT-AAAAG	1	60277831	+	3	1
	0	RNA	GAGAAAATAATGAATGTCAANNN	GAGAAgAaAATGAATGg-AAAAG	1	59191586	+	3	1
	0	RNA	GAGAAAATAATGAATGTCAANNN	GAGAAAATAgaGAATGg-AACAG	1	59980714	-	3	1
	0	RNA	GAGAAAATAATGAATGTCAANNN	aAGAAAATAAgaAATGT-AAAAG	1	85527532	+	3	1
	0	RNA	GAGAAAATAATGAATGTCAANNN	GAaAAAATAAaGAATaT-AAGGG	1	57944213	+	3	1
	0	RNA	GAGAAAATAATGAATGTCAANNN	GAGAAgATAAacAATGT-AATGG	1	107010658	+	3	1
	0	RNA	GAGAAAATAATGAATGTCAANNN	GAGAAAATAATGAATtT-tcAAG	1	102578044	-	3	1
	0	RNA	GAGAAAATAATGAATGTCAANNN	GAGAAAATAAatAtTGT-AAAGG	1	102592502	-	3	1
	0	RNA	GAGAAAATAATGAATGTCAANNN	aAcAAAATAATGAATaT-AAGGG	1	92453845	+	3	1
	0	RNA	GAGAAAATAATGAATGTCAANNN	tAGAAAATAATcAATGT-AAAGG	1	91446445	+	2	1
	0	RNA	GAGAAAATAATGAATGTCAANNN	GAGAAAAgAtaGAATGT-AATAG	1	92917449	-	3	1
	0	RNA	GAGAAAATAATGAATGTCAANNN	GAGAAAAcAAaaAATGT-AAAAG	1	60897887	-	3	1
	0	RNA	GAGAAAATAATGAATGTCAANNN	aAGAAAATAATaAATaT-AAGAG	1	48113331	+	3	1
	0	RNA	GAGAAAATAATGAATGTCAANNN	GAaAAAATAATGAATta-AACAG	1	76696853	+	3	1
	0	RNA	GAGAAAATAATGAATGTCAANNN	aAGAAAAaAATGAATtT-AAAGG	1	50321910	-	3	1
	0	RNA	GAGAAAATAATGAATGTCAANNN	GAGgAAgTAATGAAaGT-AACAG	1	54514702	+	3	1
	0	RNA	GAGAAAATAATGAATGTCAANNN	GAacAAATAATGAATGT-AATGG	1	125041388	-	2	1
	0	RNA	GAGAAAATAATGAATGTCAANNN	GAGAAAtTAAaGgATGT-AAGAG	1	129751825	+	3	1
	0	RNA	GAGAAAATAATGAATGTCAANNN	GAcAAAATgcTGAATGT-AATGG	1	134408525	-	3	1
	0	RNA	GAGAAAATAATGAATGTCAANNN	GAGAAAATAATGAATta-AcAGG	1	130346656	-	3	1
	0	RNA	GAGAAAATAATGAATGTCAANNN	GAaAAAATAATGAgTcT-AATGG	1	120008657	+	3	1
	0	RNA	GAGAAAATAATGAATGTCAANNN	GAGAAAATAtTGAATcT-gAAAG	1	124277639	+	3	1
	0	RNA	GAGAAAATAATGAATGTCAANNN	GAGAAAATtATtAATGT-AATAG	1	152184571	+	2	1
	0	RNA	GAGAAAATAATGAATGTCAANNN	GAGAgAAcAATaAATGT-AAAGG	1	111866593	-	3	1
	0	RNA	GAGAAAATAATGAATGTCAANNN	GAGAAAATAATGAAcac-AAGAG	1	143258570	-	3	1
	0	RNA	GAGAAAATAATGAATGTCAANNN	GAGAAtAcAATGAATcT-AAGAG	1	155277773	+	3	1
	0	RNA	GAGAAAATAATGAATGTCAANNN	GtGtAAATAgTGAATGT-AATAG	1	155018119	+	3	1
	0	RNA	GAGAAAATAATGAATGTCAANNN	GAGAAAATAATaAtTcT-AAAAG	1	189342894	+	3	1
	0	RNA	GAGAAAATAATGAATGTCAANNN	GAGAAAATgATaAATaT-AACAG	1	189860231	+	3	1
	0	RNA	GAGAAAATAATGAATGTCAANNN	GAGAAAAaAAaGAATGT-AAAGG	1	203740527	-	2	1
	0	RNA	GAGAAAATAATGAATGTCAANNN	GAtAAAATAATGcATtT-AAAGG	1	189602477	-	3	1
	0	RNA	GAGAAAATAATGAATGTCAANNN	GAGAAtATAATGAATGT-ctGAG	1	161430592	+	3	1
	0	RNA	GAGAAAATAATGAATGTCAANNN	aAGAAAATAATGgAgGT-AAAAG	1	193338225	+	3	1
	0	RNA	GAGAAAATAATGAATGTCAANNN	GAGAAAAaAATaAATGT-AtTGG	1	197364360	+	3	1
	0	RNA	GAGAAAATAATGAATGTCAANNN	aAGAAAATAATaAATGg-AAGAG	1	210801630	+	3	1
	0	RNA	GAGAAAATAATGAATGTCAANNN	GAGAgAATAATGttTGT-AAGAG	1	195403671	-	3	1
	0	RNA	GAGAAAATAATGAATGTCAANNN	tAGAAAATAAacAATGT-AATAG	1	150769662	-	3	1
	0	RNA	GAGAAAATAATGAATGTCAANNN	GAGAAAATAAgGAAgGg-AAGAG	1	198086408	+	3	1
	0	RNA	GAGAAAATAATGAATGTCAANNN	GAGAAAAcAATGAtTcT-AAAAG	1	197558924	+	3	1
	0	RNA	GAGAAAATAATGAATGTCAANNN	GAtAAAAaAATaAATGT-AATAG	1	212814558	+	3	1
	0	RNA	GAGAAAATAATGAATGTCAANNN	GAGAAAATAATGAtTtT-tATGG	1	182090758	-	3	1
	0	RNA	GAGAAAATAATGAATGTCAANNN	aAGAAAATtATGAATGg-AAAAG	1	173107419	+	3	1
	0	RNA	GAGAAAATAATGAATGTCAANNN	GAcAAcATAgTGAATGT-AACAG	1	217985341	+	3	1
	0	RNA	GAGAAAATAATGAATGTCAANNN	GAGAAAATgAaGAAaGT-AAGAG	1	216652461	-	3	1
	0	RNA	GAGAAAATAATGAATGTCAANNN	GAGAAAATcATGAAgGT-AAAAG	1	199556570	+	2	1
	0	RNA	GAGAAAATAATGAATGTCAANNN	GAGAAtATAAaGAAaGT-AATAG	1	227045065	+	3	1
	0	RNA	GAGAAAATAATGAATGTCAANNN	GAGAAAAaAATGAAgGa-AAAAG	1	233900868	+	3	1
	0	RNA	GAGAAAATAATGAATGTCAANNN	aAGAAAATAATGtATGT-AgAGG	1	233329488	-	3	1
	0	RNA	GAGAAAATAATGAATGTCAANNN	aAGAAAATtATGAATGc-AAAAG	1	227269610	+	3	1
	0	RNA	GAGAAAATAATGAATGTCAANNN	GAGAAAATtATGAcTGa-AACAG	1	235183710	-	3	1
	0	RNA	GAGAAAATAATGAATGTCAANNN	GAGAAAAaAATtAATaT-AACAG	1	237112973	-	3	1
	0	RNA	GAGAAAATAATGAATGTCAANNN	GAGgAtATAATGAATaT-AAAAG	1	243249211	+	3	1
	0	RNA	GAGAAAATAATGAATGTCAANNN	GAGAAAATAtTGAAaGc-AAAAG	1	240102011	-	3	1
	0	RNA	GAGAAAATAATGAATGTCAANNN	GAGAcAcTAATGcATGT-AAAAG	1	249232650	-	3	1
	0	RNA	GAGAAAATAATGAATGTCAANNN	GAGAAAATAATGAATGT-cAAAG	1	261535935	-	1	1
	0	RNA	GAGAAAATAATGAATGTCAANNN	GAGAAgATAATGcATGT-AgAAG	1	258810125	+	3	1
	0	RNA	GAGAAAATAATGAATGTCAANNN	GAGcAAATggTGAATGT-AACAG	1	259103422	-	3	1
	0	RNA	GAGAAAATAATGAATGTCAANNN	GAcAAAAcAATGAATGa-AAGAG	1	268107943	-	3	1
	0	RNA	GAGAAAATAATGAATGTCAANNN	GAcAAAATAATcAgTGTC-ACAG	1	57004807	+	3	1
	0	RNA	GAGAAAATAATGAATGTCAANNN	GAtAAAAcAAaGAATGTC-ACGG	1	40743013	-	3	1
	0	RNA	GAGAAAATAATGAATGTCAANNN	cAGAAAATAATGtATGgC-AGAG	1	42158799	-	3	1
	0	RNA	GAGAAAATAATGAATGTCAANNN	GAcAAAATAtTGAATGTa-AGAG	1	13303632	-	3	1
	0	RNA	GAGAAAATAATGAATGTCAANNN	GAGAAAcTAgTGtATGTC-AAAG	1	14511769	+	3	1
	0	RNA	GAGAAAATAATGAATGTCAANNN	GAGAtAATAATGAcTGcC-AGAG	1	68055714	-	3	1
	0	RNA	GAGAAAATAATGAATGTCAANNN	GAGAAAATAtTaAATGTa-AAGG	1	68075558	-	3	1
	0	RNA	GAGAAAATAATGAATGTCAANNN	GAcAAAATtATaAATGTC-AAAG	1	24595758	-	3	1
	0	RNA	GAGAAAATAATGAATGTCAANNN	GAGtAAATAAgGAATGTC-tTAG	1	78670237	+	3	1
	0	RNA	GAGAAAATAATGAATGTCAANNN	GAGAAgAgAgTGAATGTC-AAGG	1	68626303	+	3	1
	0	RNA	GAGAAAATAATGAATGTCAANNN	aAGAAgATAATGAATGTt-ATAG	1	25602625	-	3	1
	0	RNA	GAGAAAATAATGAATGTCAANNN	GgGAAAAgAATGAAaGTC-ACAG	1	29890798	-	3	1
	0	RNA	GAGAAAATAATGAATGTCAANNN	GAGAAAAaAAaGAATaTC-AGAG	1	84128874	-	3	1
	0	RNA	GAGAAAATAATGAATGTCAANNN	GAtAAAAcAAaGAATGTC-ACAG	1	81600211	+	3	1
	0	RNA	GAGAAAATAATGAATGTCAANNN	GAtAAAATAAaGAATGcC-ATAG	1	76072944	-	3	1
	0	RNA	GAGAAAATAATGAATGTCAANNN	GAGtAAATAATGtATGTa-AAAG	1	72540214	+	3	1
	0	RNA	GAGAAAATAATGAATGTCAANNN	tAGAAAATAATGccTGTC-ACAG	1	85887281	-	3	1
	0	RNA	GAGAAAATAATGAATGTCAANNN	GAGAAAtTAtTtAATGTC-ATAG	1	33591406	+	3	1
	0	RNA	GAGAAAATAATGAATGTCAANNN	GAGAAAAacATcAATGTC-AAGG	1	103229233	+	3	1
	0	RNA	GAGAAAATAATGAATGTCAANNN	GAGAAAATAATGAATtTt-cAAG	1	102578044	-	3	1
	0	RNA	GAGAAAATAATGAATGTCAANNN	GAtAAAATAATGAATGgC-cCAG	1	60742397	-	3	1
	0	RNA	GAGAAAATAATGAATGTCAANNN	tAGAAAATAATcAATGTa-AAGG	1	91446445	+	3	1
	0	RNA	GAGAAAATAATGAATGTCAANNN	aAGAAAAaAAaGAATGTC-AGAG	1	96556337	+	3	1
	0	RNA	GAGAAAATAATGAATGTCAANNN	GAGAAtAaAATGAAgGTC-ACAG	1	106840096	-	3	1
	0	RNA	GAGAAAATAATGAATGTCAANNN	GtGAAAcTgATGAATGTC-AAAG	1	82551516	-	3	1
	0	RNA	GAGAAAATAATGAATGTCAANNN	GAGAAAAaAAgGAAgGTC-AAGG	1	39123096	-	3	1
	0	RNA	GAGAAAATAATGAATGTCAANNN	GAaAAAATAATccATGTC-AAAG	1	38539348	-	3	1
	0	RNA	GAGAAAATAATGAATGTCAANNN	GAacAAATAATGAATGTa-ATGG	1	125041388	-	3	1
	0	RNA	GAGAAAATAATGAATGTCAANNN	GgGAAAATAATGgAaGTC-ATAG	1	119354316	+	3	1
	0	RNA	GAGAAAATAATGAATGTCAANNN	GgGAAAgTAATGAATaTC-ATGG	1	135081233	-	3	1
	0	RNA	GAGAAAATAATGAATGTCAANNN	GAGAAAATAtTGAATcTg-AAAG	1	124277639	+	3	1
	0	RNA	GAGAAAATAATGAATGTCAANNN	aAtAAAATAATaAATGTC-AAAG	1	130162964	+	3	1
	0	RNA	GAGAAAATAATGAATGTCAANNN	GAGAcAAaAATcAATGTC-AGAG	1	99426164	-	3	1
	0	RNA	GAGAAAATAATGAATGTCAANNN	GAGgAAATcATGAAaGTC-ATAG	1	154211440	-	3	1
	0	RNA	GAGAAAATAATGAATGTCAANNN	GAtAAAAcAAaGAATGTC-AAGG	1	117374668	+	3	1
	0	RNA	GAGAAAATAATGAATGTCAANNN	GAGAAAATtATtAATGTa-ATAG	1	152184571	+	3	1
	0	RNA	GAGAAAATAATGAATGTCAANNN	GAGAAcATAcTGAATGgC-ACAG	1	201744274	+	3	1
	0	RNA	GAGAAAATAATGAATGTCAANNN	aAtAAAATAATGcATGTC-AAAG	1	149129699	-	3	1
	0	RNA	GAGAAAATAATGAATGTCAANNN	GAGAAAAcAATGAAaGaC-AGAG	1	171695988	+	3	1
	0	RNA	GAGAAAATAATGAATGTCAANNN	GAGAAAAaAAaGAATGTa-AAGG	1	203740527	-	3	1
	0	RNA	GAGAAAATAATGAATGTCAANNN	GAGAAtATAATGAATGTC-tGAG	1	161430592	+	2	1
	0	RNA	GAGAAAATAATGAATGTCAANNN	GAcAAgATAtTGAATGTC-AGAG	1	150885018	-	3	1
	0	RNA	GAGAAAATAATGAATGTCAANNN	GAGAAAATAATGAtTtTt-ATGG	1	182090758	-	3	1
	0	RNA	GAGAAAATAATGAATGTCAANNN	GAtAAAAcAAaGAATGTC-AGAG	1	211358282	-	3	1
	0	RNA	GAGAAAATAATGAATGTCAANNN	GAaAAAcTAATGAgTGTC-AGAG	1	217355170	+	3	1
	0	RNA	GAGAAAATAATGAATGTCAANNN	GAcAAAATAcaGAATGTC-ATAG	1	207841760	-	3	1
	0	RNA	GAGAAAATAATGAATGTCAANNN	GAGctAAaAATGAATGTC-AAAG	1	178088756	+	3	1
	0	RNA	GAGAAAATAATGAATGTCAANNN	GAGAAAATcATGAAgGTa-AAAG	1	199556570	+	3	1
	0	RNA	GAGAAAATAATGAATGTCAANNN	aAGAAAATAATaAAaGTC-AGAG	1	199513751	+	3	1
	0	RNA	GAGAAAATAATGAATGTCAANNN	cAGAAAATAAccAATGTC-AGAG	1	226589094	-	3	1
	0	RNA	GAGAAAATAATGAATGTCAANNN	GAGAAAATAgTGAATacC-AAGG	1	183573367	+	3	1
	0	RNA	GAGAAAATAATGAATGTCAANNN	GAGAAcATAATaAATGcC-ATAG	1	231444187	+	3	1
	0	RNA	GAGAAAATAATGAATGTCAANNN	GAGAgAAcAgTGAATGTC-AGAG	1	222984442	+	3	1
	0	RNA	GAGAAAATAATGAATGTCAANNN	GAGAAAATAATGAATGTC-AAAG	1	261535935	-	0	1
	0	RNA	GAGAAAATAATGAATGTCAANNN	GAGAcAATAATaAATaTC-ATGG	1	263477061	+	3	1
	0	RNA	GAGAAAATAATGAATGTCAANNN	GAGAAAATAAaGcAT-TgAATGG	1	34341	+	3	1
	0	RNA	GAGAAAATAATGAATGTCAANNN	GAGAAAAccATGAAT-TgAAAAG	1	62733141	+	3	1
	0	RNA	GAGAAAATAATGAATGTCAANNN	GAGAAAATAtTGAAg-TCAtAGG	1	23780683	+	3	1
	0	RNA	GAGAAAATAATGAATGTCAANNN	GAGAAAATcATaAAT-TgAAAAG	1	62936917	+	3	1
	0	RNA	GAGAAAATAATGAATGTCAANNN	GAaAAAgTAATGAAT-TCAAAAG	1	35679601	-	2	1
	0	RNA	GAGAAAATAATGAATGTCAANNN	GAGtAAAgAATGAAT-TCAcCAG	1	62752395	-	3	1
	0	RNA	GAGAAAATAATGAATGTCAANNN	GAGAAAATAATaAtT-TgAAAAG	1	595017	+	3	1
	0	RNA	GAGAAAATAATGAATGTCAANNN	atGAAAATAATtAAT-TCAAAGG	1	45654770	-	3	1
	0	RNA	GAGAAAATAATGAATGTCAANNN	aAGAAAATAATaAAT-TCAgAGG	1	39824958	+	3	1
	0	RNA	GAGAAAATAATGAATGTCAANNN	aAGAAAAcAATGAAT-gCAACAG	1	40780480	-	3	1
	0	RNA	GAGAAAATAATGAATGTCAANNN	GAGtAAATAATGAAT-TaAcCAG	1	13877243	+	3	1
	0	RNA	GAGAAAATAATGAATGTCAANNN	GAGgAAAgAATGAAT-TaAAAAG	1	24361848	+	3	1
	0	RNA	GAGAAAATAATGAATGTCAANNN	GAtgAAATAATaAAT-TCAAAGG	1	78859119	+	3	1
	0	RNA	GAGAAAATAATGAATGTCAANNN	GAGtAAATtATaAAT-TCAAAAG	1	69064327	-	3	1
	0	RNA	GAGAAAATAATGAATGTCAANNN	aAGAAAATAATaAAg-TCAATGG	1	69575709	+	3	1
	0	RNA	GAGAAAATAATGAATGTCAANNN	GgtAAAATAATGAAT-aCAAAGG	1	74164441	-	3	1
	0	RNA	GAGAAAATAATGAATGTCAANNN	GAaAAAcTAATGAAT-TCAtTGG	1	79224494	-	3	1
	0	RNA	GAGAAAATAATGAATGTCAANNN	GAGAAAAaAATGAtT-aCAAAGG	1	25311797	-	3	1
	0	RNA	GAGAAAATAATGAATGTCAANNN	cAGAAAATgATaAAT-TCAATGG	1	70394470	+	3	1
	0	RNA	GAGAAAATAATGAATGTCAANNN	GAaAAAAaAATGtAT-TCAAAGG	1	30138163	+	3	1
	0	RNA	GAGAAAATAATGAATGTCAANNN	GAGAAAAaAATGAcT-TCAAAGG	1	57416345	-	2	1
	0	RNA	GAGAAAATAATGAATGTCAANNN	GAGAAAAaAtTGAAT-TaAAAGG	1	84799926	+	3	1
	0	RNA	GAGAAAATAATGAATGTCAANNN	cAGAAAtTAAaGAAT-TCAACAG	1	52613228	-	3	1
	0	RNA	GAGAAAATAATGAATGTCAANNN	GAGAAAAaAATGAAg-cCAAAAG	1	71688208	+	3	1
	0	RNA	GAGAAAATAATGAATGTCAANNN	GAtAAAATAATcAAT-TCAAGGG	1	90351686	-	2	1
	0	RNA	GAGAAAATAATGAATGTCAANNN	GAGtAAATAATGAgT-TtAAAAG	1	85441109	+	3	1
	0	RNA	GAGAAAATAATGAATGTCAANNN	GAGAAAAcAATGAAa-TCAAAAG	1	101411617	-	2	1
	0	RNA	GAGAAAATAATGAATGTCAANNN	aAGAAAATAAcaAAT-TCAATAG	1	86958955	+	3	1
	0	RNA	GAGAAAATAATGAATGTCAANNN	GAGAAAATAATGAAT-TttcAAG	1	102578044	-	3	1
	0	RNA	GAGAAAATAATGAATGTCAANNN	GAtAAAAgAATGAAT-TaAATGG	1	101670397	+	3	1
	0	RNA	GAGAAAATAATGAATGTCAANNN	GAGAAgATAgTGAAT-TgAATGG	1	112591938	-	3	1
	0	RNA	GAGAAAATAATGAATGTCAANNN	tAGAAAATAATtAAT-TCAcAAG	1	7938424	-	3	1
	0	RNA	GAGAAAATAATGAATGTCAANNN	GAtAAAgTAATGAcT-TCAACAG	1	37894375	-	3	1
	0	RNA	GAGAAAATAATGAATGTCAANNN	GAaAAAATAATGAAT-TaAACAG	1	76696853	+	2	1
	0	RNA	GAGAAAATAATGAATGTCAANNN	GAaAAAATAAaGtAT-TCAAAAG	1	78238266	-	3	1
	0	RNA	GAGAAAATAATGAATGTCAANNN	GAcAAAATAATtAAT-TCtACAG	1	123316597	+	3	1
	0	RNA	GAGAAAATAATGAATGTCAANNN	aAGAAAAaAATGAAT-TtAAAGG	1	50321910	-	3	1
	0	RNA	GAGAAAATAATGAATGTCAANNN	GAGAAAATcATGAcT-TaAAAAG	1	123275547	-	3	1
	0	RNA	GAGAAAATAATGAATGTCAANNN	GAGAAAAgAATaAAT-TaAAAAG	1	18436432	+	3	1
	0	RNA	GAGAAAATAATGAATGTCAANNN	GAtAAAtaAATGAAT-TCAACAG	1	140410042	-	3	1
	0	RNA	GAGAAAATAATGAATGTCAANNN	GAGAAAATcATGAcT-TgAAAAG	1	130024293	+	3	1
	0	RNA	GAGAAAATAATGAATGTCAANNN	GAtAAAtaAATGAAT-TCAACAG	1	140233711	+	3	1
	0	RNA	GAGAAAATAATGAATGTCAANNN	GAGAAAATAATGAAT-TaAcAGG	1	130346656	-	2	1
	0	RNA	GAGAAAATAATGAATGTCAANNN	GAGAAAtcAATGAAT-cCAAAAG	1	120202245	-	3	1
	0	RNA	GAGAAAATAATGAATGTCAANNN	GAtAAAATcATGAAc-TCAAAGG	1	130675930	+	3	1
	0	RNA	GAGAAAATAATGAATGTCAANNN	GAGAAAATtATGAtT-TaAAAAG	1	136453315	-	3	1
	0	RNA	GAGAAAATAATGAATGTCAANNN	GAaAAAATAATGAcT-TCtAAGG	1	120874135	-	3	1
	0	RNA	GAGAAAATAATGAATGTCAANNN	GAGAAAAcAATGAcT-TgAAAAG	1	131834237	+	3	1
	0	RNA	GAGAAAATAATGAATGTCAANNN	GAGAAAATAAgGAAa-TgAAGAG	1	146590509	+	3	1
	0	RNA	GAGAAAATAATGAATGTCAANNN	aAGAAAATAATGAAT-TggAAGG	1	153853688	+	3	1
	0	RNA	GAGAAAATAATGAATGTCAANNN	GgGAAAAgAATGAAT-TgAAGAG	1	163810644	-	3	1
	0	RNA	GAGAAAATAATGAATGTCAANNN	GAGAAAATAATGAAc-aCAAGAG	1	143258570	-	2	1
	0	RNA	GAGAAAATAATGAATGTCAANNN	tAaAAAATAATGAtT-TCAATAG	1	174664731	+	3	1
	0	RNA	GAGAAAATAATGAATGTCAANNN	GAGgAAATAATaAtT-TCAAAAG	1	117130525	-	3	1
	0	RNA	GAGAAAATAATGAATGTCAANNN	GAaAAAtgAATGAAT-TCAAAGG	1	190972427	-	3	1
	0	RNA	GAGAAAATAATGAATGTCAANNN	GAGAAAtgAAgGAAT-TCAAAAG	1	169083123	+	3	1
	0	RNA	GAGAAAATAATGAATGTCAANNN	GAGAAcATAATGAAa-TCAAAAG	1	139275611	+	2	1
	0	RNA	GAGAAAATAATGAATGTCAANNN	cAGAAAATAATGAAT-aCgATAG	1	185504419	-	3	1
	0	RNA	GAGAAAATAATGAATGTCAANNN	GAtAAAATgATGAAg-TCAAGAG	1	186432556	-	3	1
	0	RNA	GAGAAAATAATGAATGTCAANNN	GAGAAtATAATGAcT-TgAAAAG	1	185943124	-	3	1
	0	RNA	GAGAAAATAATGAATGTCAANNN	GAaAAAATAATaAAg-TCAAAGG	1	201742381	+	3	1
	0	RNA	GAGAAAATAATGAATGTCAANNN	GAGAAAATAATGcAT-aCAtCGG	1	148714772	+	3	1
	0	RNA	GAGAAAATAATGAATGTCAANNN	GAGAAAATcATGAtT-TgAAAAG	1	204023166	+	3	1
	0	RNA	GAGAAAATAATGAATGTCAANNN	GAGAtgATAATGAAa-TCAATGG	1	134373111	-	3	1
	0	RNA	GAGAAAATAATGAATGTCAANNN	GAtAAAATAATGcAT-TtAAAGG	1	189602477	-	3	1
	0	RNA	GAGAAAATAATGAATGTCAANNN	GAGAAAATAATGttT-TgAACAG	1	173149579	-	3	1
	0	RNA	GAGAAAATAATGAATGTCAANNN	GAGAAAgTgATGAAg-TCAATAG	1	171844850	+	3	1
	0	RNA	GAGAAAATAATGAATGTCAANNN	GgGAAAATAAaaAAT-TCAACAG	1	195365397	+	3	1
	0	RNA	GAGAAAATAATGAATGTCAANNN	aAGAAAATAATaAAa-TCAAGGG	1	161739096	-	3	1
	0	RNA	GAGAAAATAATGAATGTCAANNN	aAGAAAAagATGAAT-TCAACAG	1	209509506	-	3	1
	0	RNA	GAGAAAATAATGAATGTCAANNN	GAGAAAATcATGAcT-TgAAAAG	1	208048317	-	3	1
	0	RNA	GAGAAAATAATGAATGTCAANNN	GAGAAAATcATGAcT-TgAAAAG	1	209445813	-	3	1
	0	RNA	GAGAAAATAATGAATGTCAANNN	GAGAAAAcAgTcAAT-TCAAAAG	1	176552922	+	3	1
	0	RNA	GAGAAAATAATGAATGTCAANNN	GAGAAAATcATGAcT-TgAAAAG	1	213352941	-	3	1
	0	RNA	GAGAAAATAATGAATGTCAANNN	GAGAAAATAATGAtT-TttATGG	1	182090758	-	3	1
	0	RNA	GAGAAAATAATGAATGTCAANNN	GAGAAAATAAaGcAa-TCAAGAG	1	211117820	-	3	1
	0	RNA	GAGAAAATAATGAATGTCAANNN	GAGAAAATcATGAcT-TgAAAAG	1	195713531	+	3	1
	0	RNA	GAGAAAATAATGAATGTCAANNN	aAGAAAATAATtAAT-TaAAAAG	1	177135891	+	3	1
	0	RNA	GAGAAAATAATGAATGTCAANNN	GAGtAAATAAatAAT-TCAAAAG	1	211303269	-	3	1
	0	RNA	GAGAAAATAATGAATGTCAANNN	GAGAAAtcAATGAAT-cCAAGAG	1	220241248	+	3	1
	0	RNA	GAGAAAATAATGAATGTCAANNN	GAGAAAAaAATGAAa-TCAgGAG	1	230487526	-	3	1
	0	RNA	GAGAAAATAATGAATGTCAANNN	GAGAAAATAgTGAAT-aCcAAGG	1	183573367	+	3	1
	0	RNA	GAGAAAATAATGAATGTCAANNN	tgGAAAAgAATGAAT-TCAATAG	1	232612878	-	3	1
	0	RNA	GAGAAAATAATGAATGTCAANNN	aAGAAAATtATGAAT-gCAAAAG	1	227269610	+	3	1
	0	RNA	GAGAAAATAATGAATGTCAANNN	GAGAAAATAATaAtT-TgAAAAG	1	233902443	+	3	1
	0	RNA	GAGAAAATAATGAATGTCAANNN	tAGAAAATAAaGAAT-TgAAAAG	1	224521597	+	3	1
	0	RNA	GAGAAAATAATGAATGTCAANNN	GAGAAAATAtTGAAa-gCAAAAG	1	240102011	-	3	1
	0	RNA	GAGAAAATAATGAATGTCAANNN	GAGAtAtTAATGAgT-TCAAGGG	1	245805374	+	3	1
	0	RNA	GAGAAAATAATGAATGTCAANNN	GAtAAAgTAgTGAAT-TCAAAAG	1	248341858	-	3	1
	0	RNA	GAGAAAATAATGAATGTCAANNN	aAGAAAATAATGAtT-TaAAGAG	1	248480923	-	3	1
	0	RNA	GAGAAAATAATGAATGTCAANNN	GAGAAAAaAATGAAg-aCAAAGG	1	256631975	-	3	1
	0	RNA	GAGAAAATAATGAATGTCAANNN	GAGAAAATAATGAAT-gtcAAAG	1	261535935	-	3	1
	0	RNA	GAGAAAATAATGAATGTCAANNN	GAGAAAAcAATGAcT-TgAAAAG	1	256182954	+	3	1
	0	RNA	GAGAAAATAATGAATGTCAANNN	GAGAAAcTAgTG-ATGTgAACGG	1	56780610	-	3	1
	0	RNA	GAGAAAATAATGAATGTCAANNN	GAGAAAcTAgTGA-TGTgAACGG	1	56780610	-	3	1
	0	RNA	GAGAAAATAATGAATGTCAANNN	GAGctAATAATG-ATGTtAAAAG	1	45448345	-	3	1
	0	RNA	GAGAAAATAATGAATGTCAANNN	GAGctAATAATGA-TGTtAAAAG	1	45448345	-	3	1
	0	RNA	GAGAAAATAATGAATGTCAANNN	GAGAAAATAtTG-AaGTCAtAGG	1	23780683	+	3	1
	0	RNA	GAGAAAATAATGAATGTCAANNN	GAGAAAATAtTGA-aGTCAtAGG	1	23780683	+	3	1
	0	RNA	GAGAAAATAATGAATGTCAANNN	GAGAAAATAATa-ATtTgAAAAG	1	595017	+	3	1
	0	RNA	GAGAAAATAATGAATGTCAANNN	GAGAAAATAATaA-TtTgAAAAG	1	595017	+	3	1
	0	RNA	GAGAAAATAATGAATGTCAANNN	GtcAAAATAATG-ATGTtAACAG	1	12092520	+	3	1
	0	RNA	GAGAAAATAATGAATGTCAANNN	GtcAAAATAATGA-TGTtAACAG	1	12092520	+	3	1
	0	RNA	GAGAAAATAATGAATGTCAANNN	GgGAAAATAATG-ATGgCAtGAG	1	63925901	-	3	1
	0	RNA	GAGAAAATAATGAATGTCAANNN	GgGAAAATAATGA-TGgCAtGAG	1	63925901	-	3	1
	0	RNA	GAGAAAATAATGAATGTCAANNN	GAGAAAAgAATa-ATGTaAAAAG	1	63934334	+	3	1
	0	RNA	GAGAAAATAATGAATGTCAANNN	GAGAAAAgAATaA-TGTaAAAAG	1	63934334	+	3	1
	0	RNA	GAGAAAATAATGAATGTCAANNN	GAGAAAATAATc-ATGaaAAAAG	1	12932523	+	3	1
	0	RNA	GAGAAAATAATGAATGTCAANNN	GAGAAAATAATcA-TGaaAAAAG	1	12932523	+	3	1
	0	RNA	GAGAAAATAATGAATGTCAANNN	GAGAAAAgAATG-ATGTatACGG	1	14332005	+	3	1
	0	RNA	GAGAAAATAATGAATGTCAANNN	GAGAAAAgAATGA-TGTatACGG	1	14332005	+	3	1
	0	RNA	GAGAAAATAATGAATGTCAANNN	GAagAAATAATG-ATGaCAACAG	1	64094897	+	3	1
	0	RNA	GAGAAAATAATGAATGTCAANNN	GAagAAATAATGA-TGaCAACAG	1	64094897	+	3	1
	0	RNA	GAGAAAATAATGAATGTCAANNN	aAGAAAATAATa-AaGTCAATGG	1	69575709	+	3	1
	0	RNA	GAGAAAATAATGAATGTCAANNN	aAGAAAATAATaA-aGTCAATGG	1	69575709	+	3	1
	0	RNA	GAGAAAATAATGAATGTCAANNN	GAGAAAAaAATG-ATtaCAAAGG	1	25311797	-	3	1
	0	RNA	GAGAAAATAATGAATGTCAANNN	GAGAAAAaAATGA-TtaCAAAGG	1	25311797	-	3	1
	0	RNA	GAGAAAATAATGAATGTCAANNN	GAGAcAAcAATa-ATGTCAAAAG	1	69538790	-	3	1
	0	RNA	GAGAAAATAATGAATGTCAANNN	GAGAcAAcAATaA-TGTCAAAAG	1	69538790	-	3	1
	0	RNA	GAGAAAATAATGAATGTCAANNN	GAGAgAATAATG-ATGgtAAAGG	1	15547969	-	3	1
	0	RNA	GAGAAAATAATGAATGTCAANNN	GAGAgAATAATGA-TGgtAAAGG	1	15547969	-	3	1
	0	RNA	GAGAAAATAATGAATGTCAANNN	aAGAAAATtATG-tTGTCAATAG	1	3946793	-	3	1
	0	RNA	GAGAAAATAATGAATGTCAANNN	aAGAAAATtATGt-TGTCAATAG	1	3946793	-	3	1
	0	RNA	GAGAAAATAATGAATGTCAANNN	GAGAAAAaAATG-ActTCAAAGG	1	57416345	-	3	1
	0	RNA	GAGAAAATAATGAATGTCAANNN	GAGAAAAaAATGA-ctTCAAAGG	1	57416345	-	3	1
	0	RNA	GAGAAAATAATGAATGTCAANNN	GAGAAAAgAATG-tTGaCAATGG	1	18332373	+	3	1
	0	RNA	GAGAAAATAATGAATGTCAANNN	GAGAAAAgAATGt-TGaCAATGG	1	18332373	+	3	1
	0	RNA	GAGAAAATAATGAATGTCAANNN	GAatAAATAATG-tTGTCAATGG	1	58939642	+	3	1
	0	RNA	GAGAAAATAATGAATGTCAANNN	GAatAAATAATGt-TGTCAATGG	1	58939642	+	3	1
	0	RNA	GAGAAAATAATGAATGTCAANNN	GAGAAAAaAATG-AaGcCAAAAG	1	71688208	+	3	1
	0	RNA	GAGAAAATAATGAATGTCAANNN	GAGAAAAaAATGA-aGcCAAAAG	1	71688208	+	3	1
	0	RNA	GAGAAAATAATGAATGTCAANNN	GAGAgAAaAATc-ATGTCAAAAG	1	59941502	+	3	1
	0	RNA	GAGAAAATAATGAATGTCAANNN	GAGAgAAaAATcA-TGTCAAAAG	1	59941502	+	3	1
	0	RNA	GAGAAAATAATGAATGTCAANNN	GAGAAAAcAATG-AaaTCAAAAG	1	101411617	-	3	1
	0	RNA	GAGAAAATAATGAATGTCAANNN	GAGAAAAcAATGA-aaTCAAAAG	1	101411617	-	3	1
	0	RNA	GAGAAAATAATGAATGTCAANNN	aAGAAAAaAATG-ATGTCAtAAG	1	94073721	-	3	1
	0	RNA	GAGAAAATAATGAATGTCAANNN	aAGAAAAaAATGA-TGTCAtAAG	1	94073721	-	3	1
	0	RNA	GAGAAAATAATGAATGTCAANNN	GAGAAgATAATG-ATaTtAAGAG	1	49539967	-	3	1
	0	RNA	GAGAAAATAATGAATGTCAANNN	GAGAAgATAATGA-TaTtAAGAG	1	49539967	-	3	1
	0	RNA	GAGAAAATAATGAATGTCAANNN	GAGAAgATAAgG-tTGTCAATAG	1	141005085	-	3	1
	0	RNA	GAGAAAATAATGAATGTCAANNN	GAGAAgATAAgGt-TGTCAATAG	1	141005085	-	3	1
	0	RNA	GAGAAAATAATGAATGTCAANNN	GAGAAAATtATG-ATtTaAAAAG	1	136453315	-	3	1
	0	RNA	GAGAAAATAATGAATGTCAANNN	GAGAAAATtATGA-TtTaAAAAG	1	136453315	-	3	1
	0	RNA	GAGAAAATAATGAATGTCAANNN	GAaAAAATcATG-ATGTaAAGGG	1	22224189	+	3	1
	0	RNA	GAGAAAATAATGAATGTCAANNN	GAaAAAATcATGA-TGTaAAGGG	1	22224189	+	3	1
	0	RNA	GAGAAAATAATGAATGTCAANNN	GAGAAAATAAcG-AgGTaAAAAG	1	146523673	+	3	1
	0	RNA	GAGAAAATAATGAATGTCAANNN	GAGAAAATAAcGA-gGTaAAAAG	1	146523673	+	3	1
	0	RNA	GAGAAAATAATGAATGTCAANNN	GAGAAAATAATG-gTGTCAgCAG	1	146489485	+	2	1
	0	RNA	GAGAAAATAATGAATGTCAANNN	GAGAAAATAATGg-TGTCAgCAG	1	146489485	+	2	1
	0	RNA	GAGAAAATAATGAATGTCAANNN	GgaAAAAaAATG-ATGTCAACAG	1	151755701	+	3	1
	0	RNA	GAGAAAATAATGAATGTCAANNN	GgaAAAAaAATGA-TGTCAACAG	1	151755701	+	3	1
	0	RNA	GAGAAAATAATGAATGTCAANNN	GtGAAAATgATG-ATGTtAATGG	1	151378807	+	3	1
	0	RNA	GAGAAAATAATGAATGTCAANNN	GtGAAAATgATGA-TGTtAATGG	1	151378807	+	3	1
	0	RNA	GAGAAAATAATGAATGTCAANNN	GAaAAAATAATa-ATGTgAAAAG	1	153279992	+	3	1
	0	RNA	GAGAAAATAATGAATGTCAANNN	GAaAAAATAATaA-TGTgAAAAG	1	153279992	+	3	1
	0	RNA	GAGAAAATAATGAATGTCAANNN	GAGAAAATgcaG-ATGTCAAAGG	1	164092367	-	3	1
	0	RNA	GAGAAAATAATGAATGTCAANNN	GAGAAAATgcaGA-TGTCAAAGG	1	164092367	-	3	1
	0	RNA	GAGAAAATAATGAATGTCAANNN	GAGAAAAgAcTG-AgGTCAAGAG	1	121829515	-	3	1
	0	RNA	GAGAAAATAATGAATGTCAANNN	GAGAAAAgAcTGA-gGTCAAGAG	1	121829515	-	3	1
	0	RNA	GAGAAAATAATGAATGTCAANNN	GAGgAAATAATa-ATtTCAAAAG	1	117130525	-	3	1
	0	RNA	GAGAAAATAATGAATGTCAANNN	GAGgAAATAATaA-TtTCAAAAG	1	117130525	-	3	1
	0	RNA	GAGAAAATAATGAATGTCAANNN	tAaAAAATAATG-ATtTCAATAG	1	174664731	+	3	1
	0	RNA	GAGAAAATAATGAATGTCAANNN	tAaAAAATAATGA-TtTCAATAG	1	174664731	+	3	1
	0	RNA	GAGAAAATAATGAATGTCAANNN	GAGAAAATAATG-AacaCAAGAG	1	143258570	-	3	1
	0	RNA	GAGAAAATAATGAATGTCAANNN	GAGAAAATAATGA-acaCAAGAG	1	143258570	-	3	1
	0	RNA	GAGAAAATAATGAATGTCAANNN	GAGAAAATcAat-ATGTCAACAG	1	179548873	-	3	1
	0	RNA	GAGAAAATAATGAATGTCAANNN	GAGAAAATcAatA-TGTCAACAG	1	179548873	-	3	1
	0	RNA	GAGAAAATAATGAATGTCAANNN	aAGAAAATAATG-ATagCAAGAG	1	168690436	+	3	1
	0	RNA	GAGAAAATAATGAATGTCAANNN	aAGAAAATAATGA-TagCAAGAG	1	168690436	+	3	1
	0	RNA	GAGAAAATAATGAATGTCAANNN	GAGAcAATAATG-tTaTCAAAGG	1	133216940	+	3	1
	0	RNA	GAGAAAATAATGAATGTCAANNN	GAGAcAATAATGt-TaTCAAAGG	1	133216940	+	3	1
	0	RNA	GAGAAAATAATGAATGTCAANNN	aAaAAAATAATG-ATGTCAgGAG	1	144094187	-	3	1
	0	RNA	GAGAAAATAATGAATGTCAANNN	aAaAAAATAATGA-TGTCAgGAG	1	144094187	-	3	1
	0	RNA	GAGAAAATAATGAATGTCAANNN	GAGAAcATAATG-AaaTCAAAAG	1	139275611	+	3	1
	0	RNA	GAGAAAATAATGAATGTCAANNN	GAGAAcATAATGA-aaTCAAAAG	1	139275611	+	3	1
	0	RNA	GAGAAAATAATGAATGTCAANNN	GAtAAAATgATG-AaGTCAAGAG	1	186432556	-	3	1
	0	RNA	GAGAAAATAATGAATGTCAANNN	GAtAAAATgATGA-aGTCAAGAG	1	186432556	-	3	1
	0	RNA	GAGAAAATAATGAATGTCAANNN	GAaAAAATAATa-AaGTCAAAGG	1	201742381	+	3	1
	0	RNA	GAGAAAATAATGAATGTCAANNN	GAaAAAATAATaA-aGTCAAAGG	1	201742381	+	3	1
	0	RNA	GAGAAAATAATGAATGTCAANNN	GAGAAAATgATa-tTGTCAAAGG	1	203249010	-	3	1
	0	RNA	GAGAAAATAATGAATGTCAANNN	GAGAAAATgATat-TGTCAAAGG	1	203249010	-	3	1
	0	RNA	GAGAAAATAATGAATGTCAANNN	GAGAAAATcATG-ATtTgAAAAG	1	204023166	+	3	1
	0	RNA	GAGAAAATAATGAATGTCAANNN	GAGAAAATcATGA-TtTgAAAAG	1	204023166	+	3	1
	0	RNA	GAGAAAATAATGAATGTCAANNN	GAGAAAATAATG-tTtTgAACAG	1	173149579	-	3	1
	0	RNA	GAGAAAATAATGAATGTCAANNN	GAGAAAATAATGt-TtTgAACAG	1	173149579	-	3	1
	0	RNA	GAGAAAATAATGAATGTCAANNN	GAGAAAgTgATG-AaGTCAATAG	1	171844850	+	3	1
	0	RNA	GAGAAAATAATGAATGTCAANNN	GAGAAAgTgATGA-aGTCAATAG	1	171844850	+	3	1
	0	RNA	GAGAAAATAATGAATGTCAANNN	GAGAAAATAAat-AgGTCAAGGG	1	197371644	+	3	1
	0	RNA	GAGAAAATAATGAATGTCAANNN	GAGAAAATAAatA-gGTCAAGGG	1	197371644	+	3	1
	0	RNA	GAGAAAATAATGAATGTCAANNN	GAGAAAATcATG-ATcTgAAAAG	1	209487133	-	3	1
	0	RNA	GAGAAAATAATGAATGTCAANNN	GAGAAAATcATGA-TcTgAAAAG	1	209487133	-	3	1
	0	RNA	GAGAAAATAATGAATGTCAANNN	GtGAAAcTAcTG-ATGTCAAAAG	1	213561287	-	3	1
	0	RNA	GAGAAAATAATGAATGTCAANNN	GtGAAAcTAcTGA-TGTCAAAAG	1	213561287	-	3	1
	0	RNA	GAGAAAATAATGAATGTCAANNN	GAGAAAATAATG-ATtTttATGG	1	182090758	-	3	1
	0	RNA	GAGAAAATAATGAATGTCAANNN	GAGAAAATAATGA-TtTttATGG	1	182090758	-	3	1
	0	RNA	GAGAAAATAATGAATGTCAANNN	atGAAAATAATG-ATcTCAAAAG	1	217191306	+	3	1
	0	RNA	GAGAAAATAATGAATGTCAANNN	atGAAAATAATGA-TcTCAAAAG	1	217191306	+	3	1
	0	RNA	GAGAAAATAATGAATGTCAANNN	GAGAAAAgAATG-ATGTCttGGG	1	183207765	-	3	1
	0	RNA	GAGAAAATAATGAATGTCAANNN	GAGAAAAgAATGA-TGTCttGGG	1	183207765	-	3	1
	0	RNA	GAGAAAATAATGAATGTCAANNN	GAGAAAATAtgG-ATGcCAAAGG	1	231722407	+	3	1
	0	RNA	GAGAAAATAATGAATGTCAANNN	GAGAAAATAtgGA-TGcCAAAGG	1	231722407	+	3	1
	0	RNA	GAGAAAATAATGAATGTCAANNN	GAGAAAAaAATG-ATcTCAtGAG	1	184585012	-	3	1
	0	RNA	GAGAAAATAATGAATGTCAANNN	GAGAAAAaAATGA-TcTCAtGAG	1	184585012	-	3	1
	0	RNA	GAGAAAATAATGAATGTCAANNN	GAGAAAATAATa-ATtTgAAAAG	1	233902443	+	3	1
	0	RNA	GAGAAAATAATGAATGTCAANNN	GAGAAAATAATaA-TtTgAAAAG	1	233902443	+	3	1
	0	RNA	GAGAAAATAATGAATGTCAANNN	GAGAAAAcAATG-ATGaaAAAGG	1	245651373	+	3	1
	0	RNA	GAGAAAATAATGAATGTCAANNN	GAGAAAAcAATGA-TGaaAAAGG	1	245651373	+	3	1
	0	RNA	GAGAAAATAATGAATGTCAANNN	GAGAAAATAAcc-ATGTCAATGG	1	246981555	-	2	1
	0	RNA	GAGAAAATAATGAATGTCAANNN	GAGAAAATAAccA-TGTCAATGG	1	246981555	-	2	1
	0	RNA	GAGAAAATAATGAATGTCAANNN	aAGAAAATAATG-ATtTaAAGAG	1	248480923	-	3	1
	0	RNA	GAGAAAATAATGAATGTCAANNN	aAGAAAATAATGA-TtTaAAGAG	1	248480923	-	3	1
	0	RNA	GAGAAAATAATGAATGTCAANNN	tgGAAAATAATG-ATGTCAcTGG	1	257985160	-	3	1
	0	RNA	GAGAAAATAATGAATGTCAANNN	tgGAAAATAATGA-TGTCAcTGG	1	257985160	-	3	1
	0	RNA	GAGAAAATAATGAATGTCAANNN	GAGAAAAaAATG-AaGaCAAAGG	1	256631975	-	3	1
	0	RNA	GAGAAAATAATGAATGTCAANNN	GAGAAAAaAATGA-aGaCAAAGG	1	256631975	-	3	1
	0	RNA	GAGAAAATAATGAATGTCAANNN	GAGAAAATAATG-cTaaCAATGG	1	258995200	-	3	1
	0	RNA	GAGAAAATAATGAATGTCAANNN	GAGAAAATAATGc-TaaCAATGG	1	258995200	-	3	1
	0	RNA	GAGAAAATAATGAATGTCAANNN	cAGAAAAgAATc-ATGTCAACAG	1	262742781	-	3	1
	0	RNA	GAGAAAATAATGAATGTCAANNN	cAGAAAAgAATcA-TGTCAACAG	1	262742781	-	3	1
	0	RNA	GAGAAAATAATGAATGTCAANNN	aAGAAAAT-ATGAATcTCcAGGG	1	47191334	+	3	1
	0	RNA	GAGAAAATAATGAATGTCAANNN	aAGAAAATA-TGAATcTCcAGGG	1	47191334	+	3	1
	0	RNA	GAGAAAATAATGAATGTCAANNN	GAGAcAAa-ATGAATtTCAAAAG	1	16208029	+	3	1
	0	RNA	GAGAAAATAATGAATGTCAANNN	GAGAcAAaA-TGAATtTCAAAAG	1	16208029	+	3	1
	0	RNA	GAGAAAATAATGAATGTCAANNN	GAGAAAAc-ATGAATGcaAAAAG	1	66445056	+	3	1
	0	RNA	GAGAAAATAATGAATGTCAANNN	GAGAAAAcA-TGAATGcaAAAAG	1	66445056	+	3	1
	0	RNA	GAGAAAATAATGAATGTCAANNN	aAGtAAAg-ATGAATGTCAAGGG	1	68654256	+	3	1
	0	RNA	GAGAAAATAATGAATGTCAANNN	aAGtAAAgA-TGAATGTCAAGGG	1	68654256	+	3	1
	0	RNA	GAGAAAATAATGAATGTCAANNN	cAGAAAAT-tTGAATtTCAAGAG	1	4703701	+	3	1
	0	RNA	GAGAAAATAATGAATGTCAANNN	cAGAAAATt-TGAATtTCAAGAG	1	4703701	+	3	1
	0	RNA	GAGAAAATAATGAATGTCAANNN	tAGAAAAT-ATGAAaGaCAAGAG	1	32752915	-	3	1
	0	RNA	GAGAAAATAATGAATGTCAANNN	tAGAAAATA-TGAAaGaCAAGAG	1	32752915	-	3	1
	0	RNA	GAGAAAATAATGAATGTCAANNN	GAGAAAAT-ATtAATGatAAAAG	1	76297579	+	3	1
	0	RNA	GAGAAAATAATGAATGTCAANNN	GAGAAAATA-TtAATGatAAAAG	1	76297579	+	3	1
	0	RNA	GAGAAAATAATGAATGTCAANNN	aAGAAAAT-tTGAATGTCcAGAG	1	88385843	+	3	1
	0	RNA	GAGAAAATAATGAATGTCAANNN	aAGAAAATt-TGAATGTCcAGAG	1	88385843	+	3	1
	0	RNA	GAGAAAATAATGAATGTCAANNN	aAGAAAAT-AaGAAaGTCAAGGG	1	59709513	-	3	1
	0	RNA	GAGAAAATAATGAATGTCAANNN	aAGAAAATA-aGAAaGTCAAGGG	1	59709513	-	3	1
	0	RNA	GAGAAAATAATGAATGTCAANNN	GAGAcAAT-ATGAATGTtcAAAG	1	103829463	+	3	1
	0	RNA	GAGAAAATAATGAATGTCAANNN	GAGAcAATA-TGAATGTtcAAAG	1	103829463	+	3	1
	0	RNA	GAGAAAATAATGAATGTCAANNN	GAGAAAAg-cTGAATGTaAATGG	1	108064895	+	3	1
	0	RNA	GAGAAAATAATGAATGTCAANNN	GAGAAAAgc-TGAATGTaAATGG	1	108064895	+	3	1
	0	RNA	GAGAAAATAATGAATGTCAANNN	GAtAAAAT-ATGAgTGTgAAAAG	1	7668514	-	3	1
	0	RNA	GAGAAAATAATGAATGTCAANNN	GAtAAAATA-TGAgTGTgAAAAG	1	7668514	-	3	1
	0	RNA	GAGAAAATAATGAATGTCAANNN	tAGAAAAT-cTGAATGTCcAGGG	1	37054943	+	3	1
	0	RNA	GAGAAAATAATGAATGTCAANNN	tAGAAAATc-TGAATGTCcAGGG	1	37054943	+	3	1
	0	RNA	GAGAAAATAATGAATGTCAANNN	GtGAAAAT-ATaAATGTCtATAG	1	106354755	+	3	1
	0	RNA	GAGAAAATAATGAATGTCAANNN	GtGAAAATA-TaAATGTCtATAG	1	106354755	+	3	1
	0	RNA	GAGAAAATAATGAATGTCAANNN	GgGcAAAT-ATGAATGcCAACAG	1	163675408	+	3	1
	0	RNA	GAGAAAATAATGAATGTCAANNN	GgGcAAATA-TGAATGcCAACAG	1	163675408	+	3	1
	0	RNA	GAGAAAATAATGAATGTCAANNN	GAGAAAAT-AcaAATGgCAAAAG	1	159741838	-	3	1
	0	RNA	GAGAAAATAATGAATGTCAANNN	GAGAAAATA-caAATGgCAAAAG	1	159741838	-	3	1
	0	RNA	GAGAAAATAATGAATGTCAANNN	ctGAAAAT-ATcAATGTCAAGGG	1	128408910	-	3	1
	0	RNA	GAGAAAATAATGAATGTCAANNN	ctGAAAATA-TcAATGTCAAGGG	1	128408910	-	3	1
	0	RNA	GAGAAAATAATGAATGTCAANNN	GAcAAAAT-cTGAATGTaAAAAG	1	179435570	+	3	1
	0	RNA	GAGAAAATAATGAATGTCAANNN	GAcAAAATc-TGAATGTaAAAAG	1	179435570	+	3	1
	0	RNA	GAGAAAATAATGAATGTCAANNN	aAGAAtAT-ATGAATGTtAAAAG	1	179226827	+	3	1
	0	RNA	GAGAAAATAATGAATGTCAANNN	aAGAAtATA-TGAATGTtAAAAG	1	179226827	+	3	1
	0	RNA	GAGAAAATAATGAATGTCAANNN	GAGAAAAT-AaGAATaTgAAGAG	1	134190285	-	3	1
	0	RNA	GAGAAAATAATGAATGTCAANNN	GAGAAAATA-aGAATaTgAAGAG	1	134190285	-	3	1
	0	RNA	GAGAAAATAATGAATGTCAANNN	GAGAtAAT-ATGAATGaaAATGG	1	193397839	-	3	1
	0	RNA	GAGAAAATAATGAATGTCAANNN	GAGAtAATA-TGAATGaaAATGG	1	193397839	-	3	1
	0	RNA	GAGAAAATAATGAATGTCAANNN	GAcAAAAc-ATtAATGTCAACAG	1	180684980	+	3	1
	0	RNA	GAGAAAATAATGAATGTCAANNN	GAcAAAAcA-TtAATGTCAACAG	1	180684980	+	3	1
	0	RNA	GAGAAAATAATGAATGTCAANNN	GAGAtAAT-ATGctTGTCAATAG	1	150562147	+	3	1
	0	RNA	GAGAAAATAATGAATGTCAANNN	GAGAtAATA-TGctTGTCAATAG	1	150562147	+	3	1
	0	RNA	GAGAAAATAATGAATGTCAANNN	GAaAAAAT-gaGAATGTCAACAG	1	208361621	-	3	1
	0	RNA	GAGAAAATAATGAATGTCAANNN	GAaAAAATg-aGAATGTCAACAG	1	208361621	-	3	1
	0	RNA	GAGAAAATAATGAATGTCAANNN	GAGAAAAT-ATGgAgcTCAAAAG	1	195214526	+	3	1
	0	RNA	GAGAAAATAATGAATGTCAANNN	GAGAAAATA-TGgAgcTCAAAAG	1	195214526	+	3	1
	0	RNA	GAGAAAATAATGAATGTCAANNN	GAttAAAT-ATGAATGTgAACAG	1	156423359	-	3	1
	0	RNA	GAGAAAATAATGAATGTCAANNN	GAttAAATA-TGAATGTgAACAG	1	156423359	-	3	1
	0	RNA	GAGAAAATAATGAATGTCAANNN	tttAAAAT-ATGAATGTCAAGAG	1	166747849	-	3	1
	0	RNA	GAGAAAATAATGAATGTCAANNN	tttAAAATA-TGAATGTCAAGAG	1	166747849	-	3	1
	0	RNA	GAGAAAATAATGAATGTCAANNN	GAGAAAAT-ATaAATGTaAcTGG	1	177357734	-	3	1
	0	RNA	GAGAAAATAATGAATGTCAANNN	GAGAAAATA-TaAATGTaAcTGG	1	177357734	-	3	1
	0	RNA	GAGAAAATAATGAATGTCAANNN	GAGAAAAT-ATGgATGcCAAAGG	1	231722407	+	2	1
	0	RNA	GAGAAAATAATGAATGTCAANNN	GAGAAAATA-TGgATGcCAAAGG	1	231722407	+	2	1
	0	RNA	GAGAAAATAATGAATGTCAANNN	aAGAAgAT-AaGAATGTCAACAG	1	243066061	-	3	1
	0	RNA	GAGAAAATAATGAATGTCAANNN	aAGAAgATA-aGAATGTCAACAG	1	243066061	-	3	1
	0	RNA	GAGAAAATAATGAATGTCAANNN	GAGAAAAT-AaccATGTCAATGG	1	246981555	-	3	1
	0	RNA	GAGAAAATAATGAATGTCAANNN	GAGAAAATA-accATGTCAATGG	1	246981555	-	3	1
	0	RNA	GAGAAAATAATGAATGTCAANNN	GAGAtAAT-ATaAATGTaAAGAG	1	253533174	-	3	1
	0	RNA	GAGAAAATAATGAATGTCAANNN	GAGAtAATA-TaAATGTaAAGAG	1	253533174	-	3	1
	0	RNA	GAGAAAATAATGAATGTCAANNN	GAGAAAAT-ATGAcTGTCttAGG	1	254625350	+	3	1
	0	RNA	GAGAAAATAATGAATGTCAANNN	GAGAAAATA-TGAcTGTCttAGG	1	254625350	+	3	1
	0	RNA	GAGAAAATAATGAATGTCAANNN	GAGAAAAa-ATGAATGagAATAG	1	243805497	+	3	1
	0	RNA	GAGAAAATAATGAATGTCAANNN	GAGAAAAaA-TGAATGagAATAG	1	243805497	+	3	1
	0	RNA	GAGAAAATAATGAATGTCAANNN	GtGAAAAT-ATcAATGTgAATGG	1	261430639	+	3	1
	0	RNA	GAGAAAATAATGAATGTCAANNN	GtGAAAATA-TcAATGTgAATGG	1	261430639	+	3	1
	0	RNA	GAGAAAATAATGAATGTCAANNN	cAGAtAAT-ATGgATGTCAAAAG	1	263754449	-	3	1
	0	RNA	GAGAAAATAATGAATGTCAANNN	cAGAtAATA-TGgATGTCAAAAG	1	263754449	-	3	1
	0	RNA	GAGAAAATAATGAATGTCAANNN	aAG-AAATgATcAATGTCAAAGG	1	50813438	-	3	1
	0	RNA	GAGAAAATAATGAATGTCAANNN	aAGA-AATgATcAATGTCAAAGG	1	50813438	-	3	1
	0	RNA	GAGAAAATAATGAATGTCAANNN	aAGAA-ATgATcAATGTCAAAGG	1	50813438	-	3	1
	0	RNA	GAGAAAATAATGAATGTCAANNN	aAGAAA-TgATcAATGTCAAAGG	1	50813438	-	3	1
	0	RNA	GAGAAAATAATGAATGTCAANNN	GAG-AAATAATGAAgGaaAATAG	1	44842145	+	3	1
	0	RNA	GAGAAAATAATGAATGTCAANNN	GAGA-AATAATGAAgGaaAATAG	1	44842145	+	3	1
	0	RNA	GAGAAAATAATGAATGTCAANNN	GAGAA-ATAATGAAgGaaAATAG	1	44842145	+	3	1
	0	RNA	GAGAAAATAATGAATGTCAANNN	GAGAAA-TAATGAAgGaaAATAG	1	44842145	+	3	1
	0	RNA	GAGAAAATAATGAATGTCAANNN	GAG-AtcTAATGAATGTCcAAGG	1	40551535	+	3	1
	0	RNA	GAGAAAATAATGAATGTCAANNN	GAGA-tcTAATGAATGTCcAAGG	1	40551535	+	3	1
	0	RNA	GAGAAAATAATGAATGTCAANNN	GAGAt-cTAATGAATGTCcAAGG	1	40551535	+	3	1
	0	RNA	GAGAAAATAATGAATGTCAANNN	GAGAtc-TAATGAATGTCcAAGG	1	40551535	+	3	1
	0	RNA	GAGAAAATAATGAATGTCAANNN	GAG-AAATAATGgATGctAATGG	1	73226875	+	3	1
	0	RNA	GAGAAAATAATGAATGTCAANNN	GAGA-AATAATGgATGctAATGG	1	73226875	+	3	1
	0	RNA	GAGAAAATAATGAATGTCAANNN	GAGAA-ATAATGgATGctAATGG	1	73226875	+	3	1
	0	RNA	GAGAAAATAATGAATGTCAANNN	GAGAAA-TAATGgATGctAATGG	1	73226875	+	3	1
	0	RNA	GAGAAAATAATGAATGTCAANNN	GAG-AAATAATGAtTaTCAAGGG	1	78618914	-	2	1
	0	RNA	GAGAAAATAATGAATGTCAANNN	GAGA-AATAATGAtTaTCAAGGG	1	78618914	-	2	1
	0	RNA	GAGAAAATAATGAATGTCAANNN	GAGAA-ATAATGAtTaTCAAGGG	1	78618914	-	2	1
	0	RNA	GAGAAAATAATGAATGTCAANNN	GAGAAA-TAATGAtTaTCAAGGG	1	78618914	-	2	1
	0	RNA	GAGAAAATAATGAATGTCAANNN	GAG-AcAaAATGAATtTCAAAAG	1	16208029	+	3	1
	0	RNA	GAGAAAATAATGAATGTCAANNN	GAGA-cAaAATGAATtTCAAAAG	1	16208029	+	3	1
	0	RNA	GAGAAAATAATGAATGTCAANNN	GAGAc-AaAATGAATtTCAAAAG	1	16208029	+	3	1
	0	RNA	GAGAAAATAATGAATGTCAANNN	GAGAcA-aAATGAATtTCAAAAG	1	16208029	+	3	1
	0	RNA	GAGAAAATAATGAATGTCAANNN	GgG-AAATAATGAATGgaAATAG	1	69683974	+	3	1
	0	RNA	GAGAAAATAATGAATGTCAANNN	GgGA-AATAATGAATGgaAATAG	1	69683974	+	3	1
	0	RNA	GAGAAAATAATGAATGTCAANNN	GgGAA-ATAATGAATGgaAATAG	1	69683974	+	3	1
	0	RNA	GAGAAAATAATGAATGTCAANNN	GgGAAA-TAATGAATGgaAATAG	1	69683974	+	3	1
	0	RNA	GAGAAAATAATGAATGTCAANNN	GAG-tAATAATGAAaGTCAgAGG	1	57704363	-	3	1
	0	RNA	GAGAAAATAATGAATGTCAANNN	GAGt-AATAATGAAaGTCAgAGG	1	57704363	-	3	1
	0	RNA	GAGAAAATAATGAATGTCAANNN	GAGtA-ATAATGAAaGTCAgAGG	1	57704363	-	3	1
	0	RNA	GAGAAAATAATGAATGTCAANNN	GAGtAA-TAATGAAaGTCAgAGG	1	57704363	-	3	1
	0	RNA	GAGAAAATAATGAATGTCAANNN	GAG-AAATAcTGAATaTgAAAAG	1	61172866	-	3	1
	0	RNA	GAGAAAATAATGAATGTCAANNN	GAGA-AATAcTGAATaTgAAAAG	1	61172866	-	3	1
	0	RNA	GAGAAAATAATGAATGTCAANNN	GAGAA-ATAcTGAATaTgAAAAG	1	61172866	-	3	1
	0	RNA	GAGAAAATAATGAATGTCAANNN	GAGAAA-TAcTGAATaTgAAAAG	1	61172866	-	3	1
	0	RNA	GAGAAAATAATGAATGTCAANNN	cAG-AAATAATcAAaGTCAAAAG	1	103611354	+	3	1
	0	RNA	GAGAAAATAATGAATGTCAANNN	cAGA-AATAATcAAaGTCAAAAG	1	103611354	+	3	1
	0	RNA	GAGAAAATAATGAATGTCAANNN	cAGAA-ATAATcAAaGTCAAAAG	1	103611354	+	3	1
	0	RNA	GAGAAAATAATGAATGTCAANNN	cAGAAA-TAATcAAaGTCAAAAG	1	103611354	+	3	1
	0	RNA	GAGAAAATAATGAATGTCAANNN	GAa-AAATAATGAtTGcCAATGG	1	94038704	+	3	1
	0	RNA	GAGAAAATAATGAATGTCAANNN	GAaA-AATAATGAtTGcCAATGG	1	94038704	+	3	1
	0	RNA	GAGAAAATAATGAATGTCAANNN	GAaAA-ATAATGAtTGcCAATGG	1	94038704	+	3	1
	0	RNA	GAGAAAATAATGAATGTCAANNN	GAaAAA-TAATGAtTGcCAATGG	1	94038704	+	3	1
	0	RNA	GAGAAAATAATGAATGTCAANNN	GAG-AAATAATGAgTGTgtAAAG	1	94991667	-	3	1
	0	RNA	GAGAAAATAATGAATGTCAANNN	GAGA-AATAATGAgTGTgtAAAG	1	94991667	-	3	1
	0	RNA	GAGAAAATAATGAATGTCAANNN	GAGAA-ATAATGAgTGTgtAAAG	1	94991667	-	3	1
	0	RNA	GAGAAAATAATGAATGTCAANNN	GAGAAA-TAATGAgTGTgtAAAG	1	94991667	-	3	1
	0	RNA	GAGAAAATAATGAATGTCAANNN	GAa-AAATAATGAATGTtAAGAG	1	99254653	+	2	1
	0	RNA	GAGAAAATAATGAATGTCAANNN	GAaA-AATAATGAATGTtAAGAG	1	99254653	+	2	1
	0	RNA	GAGAAAATAATGAATGTCAANNN	GAaAA-ATAATGAATGTtAAGAG	1	99254653	+	2	1
	0	RNA	GAGAAAATAATGAATGTCAANNN	GAaAAA-TAATGAATGTtAAGAG	1	99254653	+	2	1
	0	RNA	GAGAAAATAATGAATGTCAANNN	cAG-AAATAcTGAATGgCAAGGG	1	8763038	-	3	1
	0	RNA	GAGAAAATAATGAATGTCAANNN	cAGA-AATAcTGAATGgCAAGGG	1	8763038	-	3	1
	0	RNA	GAGAAAATAATGAATGTCAANNN	cAGAA-ATAcTGAATGgCAAGGG	1	8763038	-	3	1
	0	RNA	GAGAAAATAATGAATGTCAANNN	cAGAAA-TAcTGAATGgCAAGGG	1	8763038	-	3	1
	0	RNA	GAGAAAATAATGAATGTCAANNN	tAt-AAATAATaAATGTCAAGAG	1	134438014	-	3	1
	0	RNA	GAGAAAATAATGAATGTCAANNN	tAtA-AATAATaAATGTCAAGAG	1	134438014	-	3	1
	0	RNA	GAGAAAATAATGAATGTCAANNN	tAtAA-ATAATaAATGTCAAGAG	1	134438014	-	3	1
	0	RNA	GAGAAAATAATGAATGTCAANNN	tAtAAA-TAATaAATGTCAAGAG	1	134438014	-	3	1
	0	RNA	GAGAAAATAATGAATGTCAANNN	GAa-AAATAATtAATGTaAAAAG	1	83948212	+	3	1
	0	RNA	GAGAAAATAATGAATGTCAANNN	GAaA-AATAATtAATGTaAAAAG	1	83948212	+	3	1
	0	RNA	GAGAAAATAATGAATGTCAANNN	GAaAA-ATAATtAATGTaAAAAG	1	83948212	+	3	1
	0	RNA	GAGAAAATAATGAATGTCAANNN	GAaAAA-TAATtAATGTaAAAAG	1	83948212	+	3	1
	0	RNA	GAGAAAATAATGAATGTCAANNN	GAG-gAAcAATGAtTGTCAAGAG	1	140382225	-	3	1
	0	RNA	GAGAAAATAATGAATGTCAANNN	GAGg-AAcAATGAtTGTCAAGAG	1	140382225	-	3	1
	0	RNA	GAGAAAATAATGAATGTCAANNN	GAGgA-AcAATGAtTGTCAAGAG	1	140382225	-	3	1
	0	RNA	GAGAAAATAATGAATGTCAANNN	GAGgAA-cAATGAtTGTCAAGAG	1	140382225	-	3	1
	0	RNA	GAGAAAATAATGAATGTCAANNN	cAG-AAATAATGAAaGTCAgAAG	1	143730373	-	3	1
	0	RNA	GAGAAAATAATGAATGTCAANNN	cAGA-AATAATGAAaGTCAgAAG	1	143730373	-	3	1
	0	RNA	GAGAAAATAATGAATGTCAANNN	cAGAA-ATAATGAAaGTCAgAAG	1	143730373	-	3	1
	0	RNA	GAGAAAATAATGAATGTCAANNN	cAGAAA-TAATGAAaGTCAgAAG	1	143730373	-	3	1
	0	RNA	GAGAAAATAATGAATGTCAANNN	tAG-AAAcAATGAATGTCcAGAG	1	195410364	-	3	1
	0	RNA	GAGAAAATAATGAATGTCAANNN	tAGA-AAcAATGAATGTCcAGAG	1	195410364	-	3	1
	0	RNA	GAGAAAATAATGAATGTCAANNN	tAGAA-AcAATGAATGTCcAGAG	1	195410364	-	3	1
	0	RNA	GAGAAAATAATGAATGTCAANNN	tAGAAA-cAATGAATGTCcAGAG	1	195410364	-	3	1
	0	RNA	GAGAAAATAATGAATGTCAANNN	aAG-AAATAATGAATcTCtAAGG	1	217916268	+	3	1
	0	RNA	GAGAAAATAATGAATGTCAANNN	aAGA-AATAATGAATcTCtAAGG	1	217916268	+	3	1
	0	RNA	GAGAAAATAATGAATGTCAANNN	aAGAA-ATAATGAATcTCtAAGG	1	217916268	+	3	1
	0	RNA	GAGAAAATAATGAATGTCAANNN	aAGAAA-TAATGAATcTCtAAGG	1	217916268	+	3	1
	0	RNA	GAGAAAATAATGAATGTCAANNN	cAG-AAATAATGAAgcTCAAAAG	1	199463516	-	3	1
	0	RNA	GAGAAAATAATGAATGTCAANNN	cAGA-AATAATGAAgcTCAAAAG	1	199463516	-	3	1
	0	RNA	GAGAAAATAATGAATGTCAANNN	cAGAA-ATAATGAAgcTCAAAAG	1	199463516	-	3	1
	0	RNA	GAGAAAATAATGAATGTCAANNN	cAGAAA-TAATGAAgcTCAAAAG	1	199463516	-	3	1
	0	RNA	GAGAAAATAATGAATGTCAANNN	aAa-AAATAATGAATGaCAAGAG	1	217969266	-	3	1
	0	RNA	GAGAAAATAATGAATGTCAANNN	aAaA-AATAATGAATGaCAAGAG	1	217969266	-	3	1
	0	RNA	GAGAAAATAATGAATGTCAANNN	aAaAA-ATAATGAATGaCAAGAG	1	217969266	-	3	1
	0	RNA	GAGAAAATAATGAATGTCAANNN	aAaAAA-TAATGAATGaCAAGAG	1	217969266	-	3	1
	0	RNA	GAGAAAATAATGAATGTCAANNN	tAa-AAATAATGAATGaCAAGAG	1	220200647	-	3	1
	0	RNA	GAGAAAATAATGAATGTCAANNN	tAaA-AATAATGAATGaCAAGAG	1	220200647	-	3	1
	0	RNA	GAGAAAATAATGAATGTCAANNN	tAaAA-ATAATGAATGaCAAGAG	1	220200647	-	3	1
	0	RNA	GAGAAAATAATGAATGTCAANNN	tAaAAA-TAATGAATGaCAAGAG	1	220200647	-	3	1
	0	RNA	GAGAAAATAATGAATGTCAANNN	GAc-AAATAATaAATGcCAAAAG	1	183987822	-	3	1
	0	RNA	GAGAAAATAATGAATGTCAANNN	GAcA-AATAATaAATGcCAAAAG	1	183987822	-	3	1
	0	RNA	GAGAAAATAATGAATGTCAANNN	GAcAA-ATAATaAATGcCAAAAG	1	183987822	-	3	1
	0	RNA	GAGAAAATAATGAATGTCAANNN	GAcAAA-TAATaAATGcCAAAAG	1	183987822	-	3	1
	0	RNA	GAGAAAATAATGAATGTCAANNN	aAG-AAATAATGgATGTtAAAAG	1	227908864	+	3	1
	0	RNA	GAGAAAATAATGAATGTCAANNN	aAGA-AATAATGgATGTtAAAAG	1	227908864	+	3	1
	0	RNA	GAGAAAATAATGAATGTCAANNN	aAGAA-ATAATGgATGTtAAAAG	1	227908864	+	3	1
	0	RNA	GAGAAAATAATGAATGTCAANNN	aAGAAA-TAATGgATGTtAAAAG	1	227908864	+	3	1
	0	RNA	GAGAAAATAATGAATGTCAANNN	tAG-AAAcAAaGAATGTCAAAGG	1	234894225	+	3	1
	0	RNA	GAGAAAATAATGAATGTCAANNN	tAGA-AAcAAaGAATGTCAAAGG	1	234894225	+	3	1
	0	RNA	GAGAAAATAATGAATGTCAANNN	tAGAA-AcAAaGAATGTCAAAGG	1	234894225	+	3	1
	0	RNA	GAGAAAATAATGAATGTCAANNN	tAGAAA-cAAaGAATGTCAAAGG	1	234894225	+	3	1
	0	RNA	GAGAAAATAATGAATGTCAANNN	GAG-AAAaAATGAATGagAATAG	1	243805497	+	3	1
	0	RNA	GAGAAAATAATGAATGTCAANNN	GAGA-AAaAATGAATGagAATAG	1	243805497	+	3	1
	0	RNA	GAGAAAATAATGAATGTCAANNN	GAGAA-AaAATGAATGagAATAG	1	243805497	+	3	1
	0	RNA	GAGAAAATAATGAATGTCAANNN	GAGAAA-aAATGAATGagAATAG	1	243805497	+	3	1
	0	RNA	GAGAAAATAATGAATGTCAANNN	cAa-AAATAATGAATGTtAATGG	1	246589613	-	3	1
	0	RNA	GAGAAAATAATGAATGTCAANNN	cAaA-AATAATGAATGTtAATGG	1	246589613	-	3	1
	0	RNA	GAGAAAATAATGAATGTCAANNN	cAaAA-ATAATGAATGTtAATGG	1	246589613	-	3	1
	0	RNA	GAGAAAATAATGAATGTCAANNN	cAaAAA-TAATGAATGTtAATGG	1	246589613	-	3	1
	0	RNA	GAGAAAATAATGAATGTCAANNN	aga-AAATAATGAATGTCAAAGG	1	261535934	-	3	1
	0	RNA	GAGAAAATAATGAATGTCAANNN	agaA-AATAATGAATGTCAAAGG	1	261535934	-	3	1
	0	RNA	GAGAAAATAATGAATGTCAANNN	agaAA-ATAATGAATGTCAAAGG	1	261535934	-	3	1
	0	RNA	GAGAAAATAATGAATGTCAANNN	agaAAA-TAATGAATGTCAAAGG	1	261535934	-	3	1
	0	RNA	GAGAAAATAATGAATGTCAANNN	GAG-AgATAAcGAATGgCAAAGG	1	270975969	+	3	1
	0	RNA	GAGAAAATAATGAATGTCAANNN	GAGA-gATAAcGAATGgCAAAGG	1	270975969	+	3	1
	0	RNA	GAGAAAATAATGAATGTCAANNN	GAGAg-ATAAcGAATGgCAAAGG	1	270975969	+	3	1
	0	RNA	GAGAAAATAATGAATGTCAANNN	GAGAgA-TAAcGAATGgCAAAGG	1	270975969	+	3	1
	0	RNA	GAGAAAATAATGAATGTCAANNN	t-GAAAATAATGgATGaCAAGGG	1	39873506	-	3	1
	0	RNA	GAGAAAATAATGAATGTCAANNN	G-GAAAATAATtAcTGTgAAAGG	1	39426964	-	3	1
	0	RNA	GAGAAAATAATGAATGTCAANNN	a-GAAAAaAATGAtTGTCAATGG	1	39635077	-	3	1
	0	RNA	GAGAAAATAATGAATGTCAANNN	G-GgAAATAATGAATGgaAATAG	1	69683974	+	3	1
	0	RNA	GAGAAAATAATGAATGTCAANNN	G-GtAAATAATGAATcTaAAAAG	1	75720399	+	3	1
	0	RNA	GAGAAAATAATGAATGTCAANNN	a-GAAcATAATtAATGTCAATGG	1	61425493	-	3	1
	0	RNA	GAGAAAATAATGAATGTCAANNN	a-GAAAATAATcAATGTaAAGGG	1	91446446	+	3	1
	0	RNA	GAGAAAATAATGAATGTCAANNN	G-GAAAATgATGAcTtTCAAAGG	1	102467162	-	3	1
	0	RNA	GAGAAAATAATGAATGTCAANNN	G-aAAAATAATGAtTGcCAATGG	1	94038704	+	3	1
	0	RNA	GAGAAAATAATGAATGTCAANNN	G-aAAAATAATGAATGTtAAGAG	1	99254653	+	2	1
	0	RNA	GAGAAAATAATGAATGTCAANNN	a-GAAAATAcTGAATtTCAATAG	1	118714484	-	3	1
	0	RNA	GAGAAAATAATGAATGTCAANNN	G-GAAAATAcTGcATGaCAAAAG	1	124107414	-	3	1
	0	RNA	GAGAAAATAATGAATGTCAANNN	G-aAAAATAATtAATGTaAAAAG	1	83948212	+	3	1
	0	RNA	GAGAAAATAATGAATGTCAANNN	G-GAAAATAATGgAaGTCAtAGG	1	119354317	+	3	1
	0	RNA	GAGAAAATAATGAATGTCAANNN	a-GAAAATAATaAATGTCAAAAG	1	19738888	+	2	1
	0	RNA	GAGAAAATAATGAATGTCAANNN	G-cAAAAgAATGAATcTCAATAG	1	110445946	+	3	1
	0	RNA	GAGAAAATAATGAATGTCAANNN	G-GAAAATttTGAATGTgAATGG	1	179795591	+	3	1
	0	RNA	GAGAAAATAATGAATGTCAANNN	G-GAAAATgATtAtTGTCAAGAG	1	144517336	+	3	1
	0	RNA	GAGAAAATAATGAATGTCAANNN	G-GAAAATAATGAATtTatAGAG	1	196268678	+	3	1
	0	RNA	GAGAAAATAATGAATGTCAANNN	G-GAAAAcAATaAATGTCAAAGG	1	170920098	+	2	1
	0	RNA	GAGAAAATAATGAATGTCAANNN	G-GtAAATAATGAAgGaCAAGGG	1	188843800	-	3	1
	0	RNA	GAGAAAATAATGAATGTCAANNN	G-GAAgATAAaGAATGTtAAAAG	1	204184988	+	3	1
	0	RNA	GAGAAAATAATGAATGTCAANNN	G-GAAAAaAATGAATGTgAAAGG	1	176113887	-	2	1
	0	RNA	GAGAAAATAATGAATGTCAANNN	G-GcAAcTAATGAATGgCAAGAG	1	182170488	+	3	1
	0	RNA	GAGAAAATAATGAATGTCAANNN	G-GAgAATAATcAgTGTCAATAG	1	220096960	+	3	1
	0	RNA	GAGAAAATAATGAATGTCAANNN	a-aAAAATAATGAATGaCAAGAG	1	217969266	-	3	1
	0	RNA	GAGAAAATAATGAATGTCAANNN	t-aAAAATAATGAATGaCAAGAG	1	220200647	-	3	1
	0	RNA	GAGAAAATAATGAATGTCAANNN	G-GAAAATgATtAATGTCAAGAG	1	199720011	+	2	1
	0	RNA	GAGAAAATAATGAATGTCAANNN	G-GAAAATAtaGAATtTCAAAAG	1	183466369	+	3	1
	0	RNA	GAGAAAATAATGAATGTCAANNN	c-aAAAATAATGAATGTtAATGG	1	246589613	-	3	1
	0	RNA	GAGAAAATAATGAATGTCAANNN	G-GAAAATAcTGAgTtTCAAAAG	1	245572549	+	3	1
	0	RNA	GAGAAAATAATGAATGTCAANNN	a-GAAAATAATGAATGTCAAAGG	1	261535934	-	1	1
	0	RNA	GAGAAAATAATGAATGTCAANNN	G-GAAAATAATGcATcaCAACAG	1	272480730	+	3	1
	0	DNA	GAGAAAA-TAATGAATGTCAANNN	GAGAAAACTcATcAATGTgAAAAG	2	12855638	+	3	1
	0	DNA	GAGAAAA-TAATGAATGTCAANNN	GAGAAAcCTtATGAATGTaAACAG	2	66767175	+	3	1
	0	DNA	GAGAAAA-TAATGAATGTCAANNN	aAGAAAAATAgTGAATGTCcATAG	2	1027006	-	3	1
	0	DNA	GAGAAAA-TAATGAATGTCAANNN	GAGAAAACgtATGAATGTaAAGAG	2	67333800	+	3	1
	0	DNA	GAGAAAA-TAATGAATGTCAANNN	GAaAAAAGTAATGgATGTCAgAAG	2	84453398	+	3	1
	0	DNA	GAGAAAA-TAATGAATGTCAANNN	GAcAAAATTAATaAATGTaAAAAG	2	113089179	+	3	1
	0	DNA	GAGAAAA-TAATGAATGTCAANNN	cAGAAtACTAAgGAATGTCAAAGG	2	131894172	-	3	1
	0	DNA	GAGAAAA-TAATGAATGTCAANNN	GAGAAAtTTAAcGAATGaCAATAG	2	125681644	+	3	1
	0	DNA	GAGAAAA-TAATGAATGTCAANNN	GAGAAAgATAgTGAATGTCAAGAG	2	146100686	+	2	1
	0	DNA	GAGAAAA-TAATGAATGTCAANNN	GAtAAAATTAATGAAgGaCAAAAG	2	146674463	+	3	1
	0	DNA	GAGAAAATAA-TGAATGTCAANNN	GAaAAAATAAATaAAaGTCAATGG	2	43337425	+	3	1
	0	DNA	GAGAAAATAA-TGAATGTCAANNN	aAtAAAATAAATGAgTGTCAACAG	2	20520557	+	3	1
	0	DNA	GAGAAAATAA-TGAATGTCAANNN	cAGAAAATAATTGtAcGTCAACAG	2	72326779	-	3	1
	0	DNA	GAGAAAATAA-TGAATGTCAANNN	GAaAAAATAAATaAATGTCtACAG	2	61381868	+	3	1
	0	DNA	GAGAAAATAA-TGAATGTCAANNN	tAGAAAAaAATTGAATGTgAATGG	2	75081214	+	3	1
	0	DNA	GAGAAAATAA-TGAATGTCAANNN	GAGAAAATAACTtAtTtTCAAGGG	2	22516368	-	3	1
	0	DNA	GAGAAAATAA-TGAATGTCAANNN	GAttAAATAACTaAATGTCAAAAG	2	33310242	-	3	1
	0	DNA	GAGAAAATAA-TGAATGTCAANNN	GAGAAAATAAATaAAaGaCAAAGG	2	82129197	-	3	1
	0	DNA	GAGAAAATAA-TGAATGTCAANNN	GAGAAAAgAATTGttTGTCAAGGG	2	119745725	+	3	1
	0	DNA	GAGAAAATAA-TGAATGTCAANNN	GAGAAAAgAtGTGAATGTtAACAG	2	126088292	+	3	1
	0	DNA	GAGAAAATAA-TGAATGTCAANNN	GAGAAAATAATTaAAaGcCAACAG	2	124252876	-	3	1
	0	DNA	GAGAAAATAA-TGAATGTCAANNN	aAGAAAAaAATTcAATGTCAAGGG	2	140591740	+	3	1
	0	DNA	GAGAAAATAA-TGAATGTCAANNN	GAGAAAgatAGTGAATGTCAAGAG	2	146100686	+	3	1
	0	DNA	GAGAAAATAA-TGAATGTCAANNN	GtGAAAATcAGTGAATGTaAATGG	2	145951978	+	3	1
	0	DNA	GAGAAAATAATGAA-TGTCAANNN	GAGAAAATAATaAAATaTtAAAAG	2	49546129	-	3	1
	0	DNA	GAGAAAATAATGAA-TGTCAANNN	aAcAAgATAATGAAATGTCAAGAG	2	81413335	+	3	1
	0	DNA	GAGAAAATAATGAA-TGTCAANNN	GAGAAtATAATGAATcGTCAgAAG	2	93058793	-	3	1
	0	DNA	GAGAAAATAATGAA-TGTCAANNN	GAGAAAATAATtAAAaGcCAACAG	2	124252876	-	3	1
	0	DNA	GAGAAAATAATGAATG-TCAANNN	GAGAgAgTAATGAATGTTtAAAAG	2	81852671	-	3	1
	0	DNA	GAGAAAATAATGAATG-TCAANNN	GAGAAAATAgaGAATGATaAATAG	2	65498062	+	3	1
	0	DNA	GAGAAAATAATGAATG-TCAANNN	GAGAAtATAATGAATcGTCAgAAG	2	93058793	-	3	1
	0	DNA	GAGAAAATAATGAATG-TCAANNN	GAGAAAAaAATtcATGATCAAGGG	2	110885491	-	3	1
	0	DNA	GAGAAAATAATGAATGTCAA-NNN	cAGAAAATAAgGAcTGTCAACAGG	2	19592058	-	3	1
	0	DNA	GAGAAAATAATGAATGTCAA-NNN	GAGAAAATAAacAcTGTCAAGAAG	2	57184787	+	3	1
	0	DNA	GAGAAAATAATGAATGTCAA-NNN	agGAAAATAATGAAgGTCAATGAG	2	65603355	-	3	1
	0	DNA	GAGAAAATAATGAATGTCAA-NNN	GAcAAAtTAAaGAATGTCAAGTGG	2	86963342	-	3	1
	0	DNA	GAGAAAATAATGAATGTCAA-NNN	GtGAAAATAgTGAATGTtAACCGG	2	115045127	-	3	1
	0	DNA	GAGAAAATAATGAATGTCAA-NNN	cAGAAAATAATGAATaTaAACTAG	2	134396480	+	3	1
	0	DNA	GAGAAAATAATGAATGTCAA-NNN	GgGAAAATAtTcAATGTCAACAGG	2	138346136	-	3	1
	0	DNA	GAGAAAATAATGAATGTCA-ANNN	GAGtAAAaAAgGAATGTCACAAAG	2	43784924	-	3	1
	0	DNA	GAGAAAATAATGAATGTCA-ANNN	GAcAAAATAATGAAgcTCAGAGGG	2	13264167	+	3	1
	0	DNA	GAGAAAATAATGAATGTCA-ANNN	GAGAAAATAATaAAgaTCAGAGAG	2	20872815	+	3	1
	0	DNA	GAGAAAATAATGAATGTCA-ANNN	GAaAAAATAtTGAATGcCACAAGG	2	56092212	-	3	1
	0	DNA	GAGAAAATAATGAATGTCA-ANNN	GAGAAAATgATGAAgcTCAGAAAG	2	48424952	-	3	1
	0	DNA	GAGAAAATAATGAATGTCA-ANNN	cAGAAAAaAATGAATGTgATAAAG	2	112077851	+	3	1
	0	DNA	GAGAAAATAATGAATGTCA-ANNN	cAGAAAATAATatATGTCAGATAG	2	123795449	+	3	1
	0	DNA	GAGAAAATAATGAATGTCA-ANNN	GAGAAAATAATaAAgaTCAGAGAG	2	125474817	-	3	1
	0	DNA	GAGAAAATAATGAATGTC-AANNN	GAGAgAgTAATGAATGTtTAAAAG	2	81852671	-	3	1
	0	DNA	GAGAAAATAATGAATGT-CAANNN	GAGAgAgTAATGAATGTTtAAAAG	2	81852671	-	3	1
	0	DNA	GAGAAAATAATGAATGT-CAANNN	aAGAAAAgAATGgATGTGCAATGG	2	95433635	+	3	1
	0	DNA	GAGAAAATAATGAATGT-CAANNN	GAtAAAAgAATGcATGTACAACAG	2	135505718	+	3	1
	0	DNA	GAGAAAATAATGAAT-GTCAANNN	GAGAAtATAATGAATCGTCAgAAG	2	93058793	-	2	1
	0	DNA	GAGAAAATAATGAAT-GTCAANNN	GAGgAAAaAATGAATAGaCAAAGG	2	106806669	+	3	1
	0	DNA	GAGAAAATAATGAAT-GTCAANNN	GAGAAAATAATtAAaAGcCAACAG	2	124252876	-	3	1
	0	DNA	GAGAAAATAATGA-ATGTCAANNN	GAGAAAATAATaAAATaTtAAAAG	2	49546129	-	3	1
	0	DNA	GAGAAAATAATGA-ATGTCAANNN	aAcAAgATAATGAAATGTCAAGAG	2	81413335	+	3	1
	0	DNA	GAGAAAATAATGA-ATGTCAANNN	cAGAAAATAATGATATcTaAAAAG	2	126805145	+	3	1
	0	DNA	GAGAAAATAATGA-ATGTCAANNN	GAGAAAATAATtAAAaGcCAACAG	2	124252876	-	3	1
	0	DNA	GAGAAAATAATGA-ATGTCAANNN	GAaAAAtTAATGAGAaGTCAATAG	2	134412140	+	3	1
	0	DNA	GAGAAAATAATGA-ATGTCAANNN	GAGAAAAaAAgGACATaTCAAAAG	2	140606594	-	3	1
	0	DNA	GAGAAAATAATG-AATGTCAANNN	tAGAAAATgtTGCAATGTCAACAG	2	66675732	+	3	1
	0	DNA	GAGAAAATAATG-AATGTCAANNN	GAGAAAATAtTaTAAgGTCAAGGG	2	30666523	-	3	1
	0	DNA	GAGAAAATAATG-AATGTCAANNN	GAcAAAAgAATaTAATGTCAATAG	2	54834600	+	3	1
	0	DNA	GAGAAAATAATG-AATGTCAANNN	GAGAAAATAATaAAATaTtAAAAG	2	49546129	-	3	1
	0	DNA	GAGAAAATAATG-AATGTCAANNN	aAcAAgATAATGAAATGTCAAGAG	2	81413335	+	3	1
	0	DNA	GAGAAAATAATG-AATGTCAANNN	GAGAgAAcAATGTAATGTaAATGG	2	94200118	+	3	1
	0	DNA	GAGAAAATAATG-AATGTCAANNN	aAGAAAATAATGTAATGaaAAAAG	2	124124210	-	3	1
	0	DNA	GAGAAAATAATG-AATGTCAANNN	GAGAAAATAATtAAAaGcCAACAG	2	124252876	-	3	1
	0	DNA	GAGAAAATAATG-AATGTCAANNN	aAGAAAAaAATtCAATGTCAAGGG	2	140591740	+	3	1
	0	DNA	GAGAAAATAAT-GAATGTCAANNN	cAGAAAATAATTGtAcGTCAACAG	2	72326779	-	3	1
	0	DNA	GAGAAAATAAT-GAATGTCAANNN	GAGAAAATAtTAtAAgGTCAAGGG	2	30666523	-	3	1
	0	DNA	GAGAAAATAAT-GAATGTCAANNN	GAcAAAAgAATAtAATGTCAATAG	2	54834600	+	3	1
	0	DNA	GAGAAAATAAT-GAATGTCAANNN	tAGAAAAaAATTGAATGTgAATGG	2	75081214	+	3	1
	0	DNA	GAGAAAATAAT-GAATGTCAANNN	GAGAAAATAATAaAATaTtAAAAG	2	49546129	-	3	1
	0	DNA	GAGAAAATAAT-GAATGTCAANNN	GAGAAAAaAATAGAATGTttAAAG	2	58083594	+	3	1
	0	DNA	GAGAAAATAAT-GAATGTCAANNN	GAGAAAAgAATTGttTGTCAAGGG	2	119745725	+	3	1
	0	DNA	GAGAAAATAAT-GAATGTCAANNN	GAGAAAATAATTaAAaGcCAACAG	2	124252876	-	3	1
	0	DNA	GAGAAAATAAT-GAATGTCAANNN	aAGAAAAaAATTcAATGTCAAGGG	2	140591740	+	3	1
	0	DNA	GAGAAAATA-ATGAATGTCAANNN	GAaAAAATAAATaAAaGTCAATGG	2	43337425	+	3	1
	0	DNA	GAGAAAATA-ATGAATGTCAANNN	GAGAAAcTcTATGAATGTaAACAG	2	66816789	+	3	1
	0	DNA	GAGAAAATA-ATGAATGTCAANNN	GAGAAAAcgTATGAATGTaAAGAG	2	67333800	+	3	1
	0	DNA	GAGAAAATA-ATGAATGTCAANNN	aAtAAAATAAATGAgTGTCAACAG	2	20520557	+	3	1
	0	DNA	GAGAAAATA-ATGAATGTCAANNN	GAaAAAATAAATaAATGTCtACAG	2	61381868	+	3	1
	0	DNA	GAGAAAATA-ATGAATGTCAANNN	GAGAAAATAAATaAAaGaCAAAGG	2	82129197	-	3	1
	0	DNA	GAGAAAATA-ATGAATGTCAANNN	GAGAAAATAGATtAAaGTgAAGGG	2	97866073	+	3	1
	0	DNA	GAGAAAATA-ATGAATGTCAANNN	GAGAAAATATAgGAAaGTCAtTAG	2	107214646	-	3	1
	0	DNA	GAGAAAATA-ATGAATGTCAANNN	GAGAAAAgATATGAATGTacAAAG	2	114839332	-	3	1
	0	DNA	GAGAAAATA-ATGAATGTCAANNN	GAGAAAAaAGATGAATGagAATGG	2	125836311	+	3	1
	0	DNA	GAGAAAATA-ATGAATGTCAANNN	GAGAAAAgATgTGAATGTtAACAG	2	126088292	+	3	1
	0	DNA	GAGAAAATA-ATGAATGTCAANNN	aAGAAAATATATGAAacTCAACAG	2	124279377	-	3	1
	0	DNA	GAGAAAATA-ATGAATGTCAANNN	GAGAAAATAGAaGAATGcaAATAG	2	134023576	-	3	1
	0	DNA	GAGAAAAT-AATGAATGTCAANNN	GAaAAAATAAATaAAaGTCAATGG	2	43337425	+	3	1
	0	DNA	GAGAAAAT-AATGAATGTCAANNN	GAGAAAcTCtATGAATGTaAACAG	2	66816789	+	3	1
	0	DNA	GAGAAAAT-AATGAATGTCAANNN	GAGAAAAcGtATGAATGTaAAGAG	2	67333800	+	3	1
	0	DNA	GAGAAAAT-AATGAATGTCAANNN	aAtAAAATAAATGAgTGTCAACAG	2	20520557	+	3	1
	0	DNA	GAGAAAAT-AATGAATGTCAANNN	GAaAAAATAAATaAATGTCtACAG	2	61381868	+	3	1
	0	DNA	GAGAAAAT-AATGAATGTCAANNN	GAGAAAATAAATaAAaGaCAAAGG	2	82129197	-	3	1
	0	DNA	GAGAAAAT-AATGAATGTCAANNN	GAcAAAATTAATaAATGTaAAAAG	2	113089179	+	3	1
	0	DNA	GAGAAAAT-AATGAATGTCAANNN	GAGAAAtTTAAcGAATGaCAATAG	2	125681644	+	3	1
	0	DNA	GAGAAAAT-AATGAATGTCAANNN	GAGAAAgaTAgTGAATGTCAAGAG	2	146100686	+	3	1
	0	DNA	GAGAAAAT-AATGAATGTCAANNN	GAtAAAATTAATGAAgGaCAAAAG	2	146674463	+	3	1
	0	DNA	GAGAAAAT-AATGAATGTCAANNN	GtGAAAATCAgTGAATGTaAATGG	2	145951978	+	3	1
	0	DNA	GAGAAA-ATAATGAATGTCAANNN	aAGAAAAATAgTGAATGTCcATAG	2	1027006	-	3	1
	0	DNA	GAGAAA-ATAATGAATGTCAANNN	GAGAAACcTtATGAATGTaAACAG	2	66767175	+	3	1
	0	DNA	GAGAAA-ATAATGAATGTCAANNN	GAGAAAGAggATGAAcGTCAAAAG	2	70406018	-	3	1
	0	DNA	GAGAAA-ATAATGAATGTCAANNN	GgGtAATATAATGAATGTCtACAG	2	40106532	+	3	1
	0	DNA	GAGAAA-ATAATGAATGTCAANNN	GAGAAATtTAAcGAATGaCAATAG	2	125681644	+	3	1
	0	DNA	GAGAAA-ATAATGAATGTCAANNN	GAGAAAGATAgTGAATGTCAAGAG	2	146100686	+	1	1
	0	DNA	GAGAA-AATAATGAATGTCAANNN	aAGAAAAATAgTGAATGTCcATAG	2	1027006	-	3	1
	0	DNA	GAGAA-AATAATGAATGTCAANNN	cAGAATAcTAAgGAATGTCAAAGG	2	131894172	-	3	1
	0	DNA	GAGAA-AATAATGAATGTCAANNN	GAGAAAgATAgTGAATGTCAAGAG	2	146100686	+	2	1
	0	DNA	GAGA-AAATAATGAATGTCAANNN	aAGAAAAATAgTGAATGTCcATAG	2	1027006	-	3	1
	0	DNA	GAGA-AAATAATGAATGTCAANNN	GAGAGAAATAATaAATGatAAAGG	2	125723114	-	3	1
	0	DNA	GAGA-AAATAATGAATGTCAANNN	GAGAGAAATAATGAAgtTaAAAGG	2	137376366	-	3	1
	0	DNA	GAGA-AAATAATGAATGTCAANNN	GAGAAAgATAgTGAATGTCAAGAG	2	146100686	+	2	1
	0	DNA	GAGA-AAATAATGAATGTCAANNN	cAaAGAAATAATGAATtTCAACAG	2	147059928	+	3	1
	0	DNA	GAG-AAAATAATGAATGTCAANNN	aAGAAAAATAgTGAATGTCcATAG	2	1027006	-	3	1
	0	DNA	GAG-AAAATAATGAATGTCAANNN	GgGTAAtATAATGAATGTCtACAG	2	40106532	+	3	1
	0	DNA	GAG-AAAATAATGAATGTCAANNN	aAcCAAAATAATGtATGTCAAGAG	2	78474925	-	3	1
	0	DNA	GAG-AAAATAATGAATGTCAANNN	tAGTAAAATAATGAATcaCAATGG	2	123703561	-	3	1
	0	DNA	GAG-AAAATAATGAATGTCAANNN	GAGAAAgATAgTGAATGTCAAGAG	2	146100686	+	2	1
	0	DNA	GA-GAAAATAATGAATGTCAANNN	GACGAAgATAATGAAgcTCAAAGG	2	12626058	+	3	1
	0	DNA	GA-GAAAATAATGAATGTCAANNN	GATGAAgATAAgGAATtTCAATAG	2	29588522	-	3	1
	0	DNA	GA-GAAAATAATGAATGTCAANNN	GAAGAAAATAAcaAATGTCAcAAG	2	56113803	+	3	1
	0	DNA	GA-GAAAATAATGAATGTCAANNN	aACcAAAATAATGtATGTCAAGAG	2	78474925	-	3	1
	0	DNA	GA-GAAAATAATGAATGTCAANNN	tATGAAcATAATGAATGaCAAAGG	2	31177826	+	3	1
	0	DNA	GA-GAAAATAATGAATGTCAANNN	GAAGAAtATAtTcAATGTCAAGGG	2	63393805	+	3	1
	0	DNA	GA-GAAAATAATGAATGTCAANNN	GAAGAAtATAtTcAATGTCAAGGG	2	64145706	-	3	1
	0	DNA	GA-GAAAATAATGAATGTCAANNN	cATGAAAATAATGAATcTCAgAAG	2	128081517	+	3	1
	0	DNA	GA-GAAAATAATGAATGTCAANNN	GAGaAAgATAgTGAATGTCAAGAG	2	146100686	+	3	1
	0	DNA	G-AGAAAATAATGAATGTCAANNN	tCAGAAAATAAgGAcTGTCAACAG	2	19592059	-	3	1
	0	DNA	G-AGAAAATAATGAATGTCAANNN	GAAGAAtATAtTcAATGTCAAGGG	2	63393805	+	3	1
	0	DNA	G-AGAAAATAATGAATGTCAANNN	GAAGAAtATAtTcAATGTCAAGGG	2	64145706	-	3	1
	0	DNA	G-AGAAAATAATGAATGTCAANNN	GAAGAAAATAAcaAATGTCAcAAG	2	56113803	+	3	1
	0	DNA	G-AGAAAATAATGAATGTCAANNN	GGAGAAAATAATaAAaGTgAAAAG	2	100746826	-	3	1
	0	X	GAGAAAATAATGAATGTCAANNN	cAGAAAATAAgGAcTGTCAACAG	2	19592060	-	3	0
	0	X	GAGAAAATAATGAATGTCAANNN	GAtAAAATAATGAATtaCAAAAG	2	36468811	-	3	0
	0	X	GAGAAAATAATGAATGTCAANNN	GAGAAgATAATGAAacTCAATGG	2	51907255	-	3	0
	0	X	GAGAAAATAATGAATGTCAANNN	GAGgAAATAATGAAaGTCcAGAG	2	48872502	+	3	0
	0	X	GAGAAAATAATGAATGTCAANNN	GAGAAgATAcTGAgTGTCAACAG	2	76394845	-	3	0
	0	X	GAGAAAATAATGAATGTCAANNN	GAGAAAATAATaAAaGTgAAAAG	2	100746827	-	3	0
	0	X	GAGAAAATAATGAATGTCAANNN	GAaAAAATAATaAATGTaAACAG	2	96852068	+	3	0
	0	X	GAGAAAATAATGAATGTCAANNN	GAGAAAgTgATGAATGTaAATAG	2	120208787	+	3	0
	0	X	GAGAAAATAATGAATGTCAANNN	GAGAtAATcATGAATGTgAAAAG	2	126031271	-	3	0
	0	X	GAGAAAATAATGAATGTCAANNN	GgGAAAATAtTcAATGTCAACAG	2	138346138	-	3	0
	0	RNA	GAGAAAATAATGAATGTCAANNN	#NAME?	2	19592061	-	2	1
	0	RNA	GAGAAAATAATGAATGTCAANNN	#NAME?	2	36468812	-	3	1
	0	RNA	GAGAAAATAATGAATGTCAANNN	#NAME?	2	51907256	-	3	1
	0	RNA	GAGAAAATAATGAATGTCAANNN	#NAME?	2	62517649	-	3	1
	0	RNA	GAGAAAATAATGAATGTCAANNN	#NAME?	2	31177828	+	3	1
	0	RNA	GAGAAAATAATGAATGTCAANNN	#NAME?	2	63393807	+	3	1
	0	RNA	GAGAAAATAATGAATGTCAANNN	#NAME?	2	64145708	-	3	1
	0	RNA	GAGAAAATAATGAATGTCAANNN	#NAME?	2	48872503	+	3	1
	0	RNA	GAGAAAATAATGAATGTCAANNN	#NAME?	2	76394846	-	3	1
	0	RNA	GAGAAAATAATGAATGTCAANNN	#NAME?	2	55158728	-	3	1
	0	RNA	GAGAAAATAATGAATGTCAANNN	#NAME?	2	33548902	+	3	1
	0	RNA	GAGAAAATAATGAATGTCAANNN	#NAME?	2	78474927	-	3	1
	0	RNA	GAGAAAATAATGAATGTCAANNN	#NAME?	2	56113805	+	3	1
	0	RNA	GAGAAAATAATGAATGTCAANNN	#NAME?	2	96852069	+	3	1
	0	RNA	GAGAAAATAATGAATGTCAANNN	#NAME?	2	100746828	-	3	1
	0	RNA	GAGAAAATAATGAATGTCAANNN	#NAME?	2	99326054	-	3	1
	0	RNA	GAGAAAATAATGAATGTCAANNN	#NAME?	2	34585676	+	3	1
	0	RNA	GAGAAAATAATGAATGTCAANNN	#NAME?	2	110260843	+	3	1
	0	RNA	GAGAAAATAATGAATGTCAANNN	#NAME?	2	118062920	+	3	1
	0	RNA	GAGAAAATAATGAATGTCAANNN	#NAME?	2	118935619	+	3	1
	0	RNA	GAGAAAATAATGAATGTCAANNN	#NAME?	2	126031272	-	3	1
	0	RNA	GAGAAAATAATGAATGTCAANNN	#NAME?	2	120208788	+	3	1
	0	RNA	GAGAAAATAATGAATGTCAANNN	#NAME?	2	126146937	+	3	1
	0	RNA	GAGAAAATAATGAATGTCAANNN	#NAME?	2	128081519	+	3	1
	0	RNA	GAGAAAATAATGAATGTCAANNN	#NAME?	2	133211632	+	3	1
	0	RNA	GAGAAAATAATGAATGTCAANNN	#NAME?	2	138346139	-	3	1
	0	RNA	GAGAAAATAATGAATGTCAANNN	#NAME?	2	145118497	+	3	1
	0	RNA	GAGAAAATAATGAATGTCAANNN	#NAME?	2	147059930	+	3	1
	0	RNA	GAGAAAATAATGAATGTCAANNN	#NAME?	2	148747806	+	3	1
	0	RNA	GAGAAAATAATGAATGTCAANNN	GA-AAAATAgTGAATGTCcATAG	2	1027008	-	2	1
	0	RNA	GAGAAAATAATGAATGTCAANNN	GA-AAAAgAATGAgTGTCAtGGG	2	21482621	+	3	1
	0	RNA	GAGAAAATAATGAATGTCAANNN	Gt-AAtATAATGAATGTCtACAG	2	40106534	+	3	1
	0	RNA	GAGAAAATAATGAATGTCAANNN	GA-AAAAaAATcAATGTtAAAGG	2	63533451	+	3	1
	0	RNA	GAGAAAATAATGAATGTCAANNN	GA-AAAAaAtTGAATGTgAATGG	2	75081216	+	3	1
	0	RNA	GAGAAAATAATGAATGTCAANNN	GA-AAAATAAaGAcTGTgAAGAG	2	57216347	+	3	1
	0	RNA	GAGAAAATAATGAATGTCAANNN	cc-AAAATAATGtATGTCAAGAG	2	78474927	-	3	1
	0	RNA	GAGAAAATAATGAATGTCAANNN	GA-AAAATtAgGAATGTaAAAGG	2	91912622	+	3	1
	0	RNA	GAGAAAATAATGAATGTCAANNN	aA-AAAATAATaAATGTaAACAG	2	96852069	+	3	1
	0	RNA	GAGAAAATAATGAATGTCAANNN	GA-AAAAaAATGAATtTaAAAAG	2	100144995	-	3	1
	0	RNA	GAGAAAATAATGAATGTCAANNN	GA-AAAATtAaaAATGTCAATAG	2	98649329	+	3	1
	0	RNA	GAGAAAATAATGAATGTCAANNN	cA-AAAATAtTGAcTGTCAAGAG	2	109691714	+	3	1
	0	RNA	GAGAAAATAATGAATGTCAANNN	tA-AAAATAtTcAATGTCAACAG	2	111357450	-	3	1
	0	RNA	GAGAAAATAATGAATGTCAANNN	GA-AAAATAATaAATaTaAATGG	2	121799073	-	3	1
	0	RNA	GAGAAAATAATGAATGTCAANNN	Gt-AAAATAATGAATcaCAATGG	2	123703563	-	3	1
	0	RNA	GAGAAAATAATGAATGTCAANNN	aA-AAAATAATGAATtTtAAAGG	2	118935619	+	3	1
	0	RNA	GAGAAAATAATGAATGTCAANNN	GA-AtAcTAAgGAATGTCAAAGG	2	131894174	-	3	1
	0	RNA	GAGAAAATAATGAATGTCAANNN	Gg-AAAATAtTcAATGTCAACAG	2	138346139	-	3	1
	0	RNA	GAGAAAATAATGAATGTCAANNN	GA-AAAAaAtTcAATGTCAAGGG	2	140591742	+	3	1
	0	RNA	GAGAAAATAATGAATGTCAANNN	GA-AAgATAgTGAATGTCAAGAG	2	146100688	+	2	1
	0	RNA	GAGAAAATAATGAATGTCAANNN	Gt-AAAATAATGAATGggAAGAG	2	146846443	-	3	1
	0	RNA	GAGAAAATAATGAATGTCAANNN	aA-gAAATAATGAATtTCAACAG	2	147059930	+	3	1
	0	RNA	GAGAAAATAATGAATGTCAANNN	GAGAAAA-AAgGAAaGTCcATAG	2	43387129	-	3	1
	0	RNA	GAGAAAATAATGAATGTCAANNN	GAGtcAA-AATGAAaGTCAAAAG	2	60012077	+	3	1
	0	RNA	GAGAAAATAATGAATGTCAANNN	GAGAcAA-tATGAATGTCAcAGG	2	71099428	+	3	1
	0	RNA	GAGAAAATAATGAATGTCAANNN	GAGAAAA-gATGAATGTCAtTGG	2	46480125	-	2	1
	0	RNA	GAGAAAATAATGAATGTCAANNN	GAaAAAA-AtTGAATGTgAATGG	2	75081216	+	3	1
	0	RNA	GAGAAAATAATGAATGTCAANNN	GAGAAAA-AggaAATGTCAAAGG	2	62260503	+	3	1
	0	RNA	GAGAAAATAATGAATGTCAANNN	GAGAAAA-AATGAAgtTaAAAGG	2	4595936	+	3	1
	0	RNA	GAGAAAATAATGAATGTCAANNN	GAaAAAA-AATcAATGTtAAAGG	2	63533451	+	3	1
	0	RNA	GAGAAAATAATGAATGTCAANNN	GAGAAAA-AcTGAATGgaAAGGG	2	11255804	+	3	1
	0	RNA	GAGAAAATAATGAATGTCAANNN	GAGAgAA-AATGAATGTgAtAGG	2	11934779	+	3	1
	0	RNA	GAGAAAATAATGAATGTCAANNN	GAtAAAA-tATGAATGTaAAAAG	2	95919851	+	3	1
	0	RNA	GAGAAAATAATGAATGTCAANNN	GAaAAAA-AATGAATtTaAAAAG	2	100144995	-	3	1
	0	RNA	GAGAAAATAATGAATGTCAANNN	aAGAAAg-AATGAATGgCAAAAG	2	98232545	-	3	1
	0	RNA	GAGAAAATAATGAATGTCAANNN	GtcAAAA-AATGAATGTaAATAG	2	106162529	-	3	1
	0	RNA	GAGAAAATAATGAATGTCAANNN	GAGAAAA-AAgaAATcTCAACAG	2	105434987	-	3	1
	0	RNA	GAGAAAATAATGAATGTCAANNN	GAGAAtA-AATGAATaTaAAAGG	2	114547437	+	3	1
	0	RNA	GAGAAAATAATGAATGTCAANNN	GAGAAAA-gATGtATGTaAACAG	2	115596159	-	3	1
	0	RNA	GAGAAAATAATGAATGTCAANNN	GAGAAAA-AATGAAaGTaAgGAG	2	124729368	-	3	1
	0	RNA	GAGAAAATAATGAATGTCAANNN	GAGAAAA-AgTGAAaGTCAgGAG	2	127785738	+	3	1
	0	RNA	GAGAAAATAATGAATGTCAANNN	GActAgA-AATGAATGTCAATGG	2	119988792	-	3	1
	0	RNA	GAGAAAATAATGAATGTCAANNN	GAaAAAA-AtTcAATGTCAAGGG	2	140591742	+	3	1
	0	RNA	GAGAAAATAATGAATGTCAANNN	aAGAAAt-AATGAATtTCAACAG	2	147059930	+	3	1
	0	RNA	GAGAAAATAATGAATGTCAANNN	GAGAAcA-AtTGAATGTtAAAAG	2	147603251	+	3	1
	0	RNA	GAGAAAATAATGAATGTCAANNN	GtGAAAATAA-GAATtTtAAAAG	2	27307374	-	3	1
	0	RNA	GAGAAAATAATGAATGTCAANNN	cAGAAAATAA-GAATGTggAGGG	2	27414367	+	3	1
	0	RNA	GAGAAAATAATGAATGTCAANNN	cAGAAAATAA-GAATGTggAGGG	2	27435615	+	3	1
	0	RNA	GAGAAAATAATGAATGTCAANNN	GAGAAtATAA-GAAcaTCAAGGG	2	66728330	-	3	1
	0	RNA	GAGAAAATAATGAATGTCAANNN	GAGAgAATAA-GAccGTCAATGG	2	13388070	-	3	1
	0	RNA	GAGAAAATAATGAATGTCAANNN	GAGAAAATAA-GgAaaTCAAAAG	2	13364178	-	3	1
	0	RNA	GAGAAAATAATGAATGTCAANNN	GAGAAAATAA-GAATacCAtCAG	2	67851541	-	3	1
	0	RNA	GAGAAAATAATGAATGTCAANNN	GAGAAAATAA-GAATacCAtCAG	2	67949849	+	3	1
	0	RNA	GAGAAAATAATGAATGTCAANNN	GAGAAAATAA-tAATtTgAAAAG	2	37400829	+	3	1
	0	RNA	GAGAAAATAATGAATGTCAANNN	GAGAcAATAt-GAATGTCAcAGG	2	71099428	+	3	1
	0	RNA	GAGAAAATAATGAATGTCAANNN	GAGAAAcTAA-GAATcgCAAAAG	2	15248146	-	3	1
	0	RNA	GAGAAAATAATGAATGTCAANNN	GAGAAAAgAt-GAATGTCAtTGG	2	46480125	-	3	1
	0	RNA	GAGAAAATAATGAATGTCAANNN	GAGAAggTAA-GAATtTCAAGAG	2	32341956	-	3	1
	0	RNA	GAGAAAATAATGAATGTCAANNN	GAGAAAATAA-ttATcTCAAGGG	2	72673583	+	3	1
	0	RNA	GAGAAAATAATGAATGTCAANNN	aAcAAAATAA-GAATaTCAACAG	2	10084981	+	3	1
	0	RNA	GAGAAAATAATGAATGTCAANNN	GAGAggATAA-GAAgGTCAAGGG	2	26495898	+	3	1
	0	RNA	GAGAAAATAATGAATGTCAANNN	GAGAAAAgAA-cAATGTgAAGGG	2	18735407	+	3	1
	0	RNA	GAGAAAATAATGAATGTCAANNN	aAGAAAATAA-GAATacCAATAG	2	89923767	-	3	1
	0	RNA	GAGAAAATAATGAATGTCAANNN	GAtAAAATAt-GAATGTaAAAAG	2	95919851	+	3	1
	0	RNA	GAGAAAATAATGAATGTCAANNN	GAaAtAAgAA-GAATGTCAAAGG	2	97425001	-	3	1
	0	RNA	GAGAAAATAATGAATGTCAANNN	GAaAAAtTAA-aAATGTCAATAG	2	98649329	+	3	1
	0	RNA	GAGAAAATAATGAATGTCAANNN	tAGAAAATAA-aAATtTCAAAAG	2	99947664	+	3	1
	0	RNA	GAGAAAATAATGAATGTCAANNN	GAtAAAATAA-GtATGTtAACAG	2	109418830	-	3	1
	0	RNA	GAGAAAATAATGAATGTCAANNN	GAGAAAATAA-cAcTtTCAAAGG	2	108125122	-	3	1
	0	RNA	GAGAAAATAATGAATGTCAANNN	GAGAAAATgA-GAATGTaAAAAG	2	113498837	-	2	1
	0	RNA	GAGAAAATAATGAATGTCAANNN	GAGAAttTcA-GAATGTCAAGAG	2	115590402	+	3	1
	0	RNA	GAGAAAATAATGAATGTCAANNN	GAGAAAATAA-tAATtTtAAAAG	2	125407279	+	3	1
	0	RNA	GAGAAAATAATGAATGTCAANNN	tAGAAAATAA-GAAgGgCAAAAG	2	130337092	+	3	1
	0	RNA	GAGAAAATAATGAATGTCAANNN	aAGAAAgTAA-GAATtTCAACAG	2	133663586	-	3	1
	0	RNA	GAGAAAATAATGAATGTCAANNN	ttGAAAATAA-GAATGTCAtTAG	2	138299709	-	3	1
	0	RNA	GAGAAAATAATGAATGTCAANNN	GAGAAAATAA-GAgTGTaAgGAG	2	144823557	-	3	1
	0	RNA	GAGAAAATAATGAATGTCAANNN	GAGAAAAcAAT-AATtTgAAAAG	2	36026144	+	3	1
	0	RNA	GAGAAAATAATGAATGTCAANNN	tAGAAtATAAT-AATGTCtATAG	2	27934018	+	3	1
	0	RNA	GAGAAAATAATGAATGTCAANNN	GAGAAAATgAT-AATtTgAAAGG	2	724884	-	3	1
	0	RNA	GAGAAAATAATGAATGTCAANNN	GAGAAAATcAT-AATtTgAAAAG	2	68020737	-	3	1
	0	RNA	GAGAAAATAATGAATGTCAANNN	GAGAAAATAAT-AATtTgAAAAG	2	37400829	+	2	1
	0	RNA	GAGAAAATAATGAATGTCAANNN	GAGAAAATcAT-AATtTgAAAGG	2	53364942	-	3	1
	0	RNA	GAGAAAATAATGAATGTCAANNN	cAGAtAATAAT-AATGTCcAGGG	2	61487105	+	3	1
	0	RNA	GAGAAAATAATGAATGTCAANNN	GAGAAAATAAT-ttTGTgAAGAG	2	23057459	-	3	1
	0	RNA	GAGAAAATAATGAATGTCAANNN	GAGAAAAcAAT-AATtTgAAAAG	2	16315306	-	3	1
	0	RNA	GAGAAAATAATGAATGTCAANNN	GAGAAAATAAT-AATtTaAtGGG	2	16446652	+	3	1
	0	RNA	GAGAAAATAATGAATGTCAANNN	GAGAAAATcAT-AATcTgAAAAG	2	74133314	-	3	1
	0	RNA	GAGAAAATAATGAATGTCAANNN	GAGAAAATAAT-tATcTCAAGGG	2	72673583	+	2	1
	0	RNA	GAGAAAATAATGAATGTCAANNN	GAGAAAATcAT-AATtTgAAAAG	2	75669318	+	3	1
	0	RNA	GAGAAAATAATGAATGTCAANNN	aAGAAAATAAT-AAaGgCAAGAG	2	57071185	-	3	1
	0	RNA	GAGAAAATAATGAATGTCAANNN	aAGAAAATAAT-AATacCAACAG	2	33764685	+	3	1
	0	RNA	GAGAAAATAATGAATGTCAANNN	GAGAAAAaAAT-AATcTCAcCAG	2	42018963	-	3	1
	0	RNA	GAGAAAATAATGAATGTCAANNN	GAGAAAAgAAc-AATGTgAAGGG	2	18735407	+	3	1
	0	RNA	GAGAAAATAATGAATGTCAANNN	aAGAAAgTAAT-AATaTCAAAAG	2	85105088	-	3	1
	0	RNA	GAGAAAATAATGAATGTCAANNN	GtaAAAATAAT-AATGTaAATAG	2	87789948	+	3	1
	0	RNA	GAGAAAATAATGAATGTCAANNN	GAGtAAATAAT-AcTGgCAAAGG	2	92181548	+	3	1
	0	RNA	GAGAAAATAATGAATGTCAANNN	aAcAAAATAAT-AATGTaAATGG	2	93613571	-	3	1
	0	RNA	GAGAAAATAATGAATGTCAANNN	GAGAAAATAAT-AATGTggtTGG	2	94810126	-	3	1
	0	RNA	GAGAAAATAATGAATGTCAANNN	GAGAAAAcAAT-AATtTgAAAAG	2	98216472	-	3	1
	0	RNA	GAGAAAATAATGAATGTCAANNN	tAGAAAATAAa-AATtTCAAAAG	2	99947664	+	3	1
	0	RNA	GAGAAAATAATGAATGTCAANNN	GAaAAAtTAAa-AATGTCAATAG	2	98649329	+	3	1
	0	RNA	GAGAAAATAATGAATGTCAANNN	aAGAtAATAAT-AATGTCtAGGG	2	105821505	+	3	1
	0	RNA	GAGAAAATAATGAATGTCAANNN	GAGAAAATcAT-AATGTtAtTAG	2	107658105	-	3	1
	0	RNA	GAGAAAATAATGAATGTCAANNN	GAGAAAATAAc-AcTtTCAAAGG	2	108125122	-	3	1
	0	RNA	GAGAAAATAATGAATGTCAANNN	GAGAAAATcAT-AATtTgAAAAG	2	114242933	-	3	1
	0	RNA	GAGAAAATAATGAATGTCAANNN	GAGAAAATgAg-AATGTaAAAAG	2	113498837	-	3	1
	0	RNA	GAGAAAATAATGAATGTCAANNN	GAGAAAATcAT-AATtTgAAAAG	2	124746821	-	3	1
	0	RNA	GAGAAAATAATGAATGTCAANNN	GAGAAAATcAT-AATtTgAAAAG	2	106545546	+	3	1
	0	RNA	GAGAAAATAATGAATGTCAANNN	aAGAAAATAAT-AATacCAACAG	2	128886639	-	3	1
	0	RNA	GAGAAAATAATGAATGTCAANNN	GAatAAATAAT-AATGTCAtTGG	2	129097333	+	3	1
	0	RNA	GAGAAAATAATGAATGTCAANNN	GAGAAAATAAT-AATtTtAAAAG	2	125407279	+	2	1
	0	RNA	GAGAAAATAATGAATGTCAANNN	GAGAAAAccAT-AATGTgAAAAG	2	132876480	-	3	1
	0	RNA	GAGAAAATAATGAATGTCAANNN	GAGAAAATcAT-AATtTgAAAAG	2	139262005	+	3	1
	0	RNA	GAGAAAATAATGAATGTCAANNN	aAaAAAATAAT-AATaTCAAAAG	2	135337349	-	3	1
	0	RNA	GAGAAAATAATGAATGTCAANNN	GAGAAAAacAT-AATGTCAgTAG	2	133247503	-	3	1
	0	RNA	GAGAAAATAATGAATGTCAANNN	aAcAAAATAAT-AATGTCtAGAG	2	147219203	+	3	1
	0	RNA	GAGAAAATAATGAATGTCAANNN	GAGAAAATAAT-tAgGaCAACAG	2	144155480	-	3	1
	0	RNA	GAGAAAATAATGAATGTCAANNN	GgGAAgATAATGAA-GTCAACAG	2	20451020	-	2	1
	0	RNA	GAGAAAATAATGAATGTCAANNN	GAGAAAATAAgGAA-aTCAAAAG	2	13364178	-	2	1
	0	RNA	GAGAAAATAATGAATGTCAANNN	GAaAAAATAgaGAA-GTCAAGAG	2	68954810	+	3	1
	0	RNA	GAGAAAATAATGAATGTCAANNN	GAGAAAATAATtAt-cTCAAGGG	2	72673583	+	3	1
	0	RNA	GAGAAAATAATGAATGTCAANNN	GAaAtAATAATGAA-aTCAATAG	2	30567564	+	3	1
	0	RNA	GAGAAAATAATGAATGTCAANNN	GtGAAAATgATGcA-GTCAAGAG	2	3765959	+	3	1
	0	RNA	GAGAAAATAATGAATGTCAANNN	GAGAAgAaAATGAA-GTgAATGG	2	63195444	+	3	1
	0	RNA	GAGAAAATAATGAATGTCAANNN	aAGAAAAaAATGAA-GTgAACAG	2	63164061	+	3	1
	0	RNA	GAGAAAATAATGAATGTCAANNN	tAaAAAATAATGAA-GaCAAAAG	2	78032191	-	3	1
	0	RNA	GAGAAAATAATGAATGTCAANNN	aAGAAAATAATaAA-GgCAAGAG	2	57071185	-	3	1
	0	RNA	GAGAAAATAATGAATGTCAANNN	agGAAAATAATGAA-GcCAATAG	2	65524366	+	3	1
	0	RNA	GAGAAAATAATGAATGTCAANNN	GAGAAAATAAaGAA-GaaAAAAG	2	81943720	-	3	1
	0	RNA	GAGAAAATAATGAATGTCAANNN	atGAAAATAAgGAA-GTCAATGG	2	89860558	-	3	1
	0	RNA	GAGAAAATAATGAATGTCAANNN	GAGAAAATcAaGAA-GaCAACAG	2	88412951	-	3	1
	0	RNA	GAGAAAATAATGAATGTCAANNN	GAGAAAATgATGAA-tgCAAGGG	2	88499857	-	3	1
	0	RNA	GAGAAAATAATGAATGTCAANNN	GtGcAAATAATGAA-GTCtATAG	2	91812730	+	3	1
	0	RNA	GAGAAAATAATGAATGTCAANNN	GAGAAAATtATGAA-taCAAAAG	2	93883256	-	3	1
	0	RNA	GAGAAAATAATGAATGTCAANNN	GAtAAAATAATcAA-tTCAAAAG	2	94272015	+	3	1
	0	RNA	GAGAAAATAATGAATGTCAANNN	GAGAAAATAtTGAA-agCAAGGG	2	109870916	+	3	1
	0	RNA	GAGAAAATAATGAATGTCAANNN	cAGAAAATcATtAA-GTCAAGAG	2	109019647	+	3	1
	0	RNA	GAGAAAATAATGAATGTCAANNN	cAGAgAATAATGAA-aTCAAAAG	2	113055565	+	3	1
	0	RNA	GAGAAAATAATGAATGTCAANNN	GAGAAgATAATGAA-GTtAAAGG	2	118281136	-	2	1
	0	RNA	GAGAAAATAATGAATGTCAANNN	GAGAAAAcAAgGAA-GaCAAAGG	2	140937775	+	3	1
	0	RNA	GAGAAAATAATGAATGTCAANNN	GAGAAAATAATtAg-GaCAACAG	2	144155480	-	3	1
	0	RNA	GAGAAAATAATGAATGTCAANNN	GAGAAAATtATGAA-acCAAAAG	2	147152084	+	3	1
	0	RNA	GAGAAAATAATGAATGTCAANNN	aAGAAAATgATGAA-GaCAAAAG	2	148792403	-	3	1
	0	RNA	GAGAAAATAATGAATGTCAANNN	tAGAAAAgAATGAATG-aAAAAG	2	65775423	-	3	1
	0	RNA	GAGAAAATAATGAATGTCAANNN	aAGAAAATAATGAgTG-tAAAAG	2	51492209	-	3	1
	0	RNA	GAGAAAATAATGAATGTCAANNN	aAaAAAAaAATGAATG-CAAGGG	2	66038637	+	3	1
	0	RNA	GAGAAAATAATGAATGTCAANNN	GAGAAAATAAgGAAat-CAAAAG	2	13364178	-	3	1
	0	RNA	GAGAAAATAATGAATGTCAANNN	aAGAAgAcAATGAATG-CAAAAG	2	68380728	+	3	1
	0	RNA	GAGAAAATAATGAATGTCAANNN	cAGAAAATAATtAATc-CAATGG	2	14447677	+	3	1
	0	RNA	GAGAAAATAATGAATGTCAANNN	GAGAAAAaAATcAATG-aAAGAG	2	70529101	-	3	1
	0	RNA	GAGAAAATAATGAATGTCAANNN	aAGAAgATAATGAgTG-CAAGAG	2	22608920	+	3	1
	0	RNA	GAGAAAATAATGAATGTCAANNN	GAGAAAATcAgaAATG-CAACAG	2	31122662	-	3	1
	0	RNA	GAGAAAATAATGAATGTCAANNN	GAcAAAATAgTGAgTG-CAAAGG	2	73057442	-	3	1
	0	RNA	GAGAAAATAATGAATGTCAANNN	aAGAAAATAATaAAgG-CAAGAG	2	57071185	-	3	1
	0	RNA	GAGAAAATAATGAATGTCAANNN	aAGAAAATAATGAcTG-aAATGG	2	39045487	-	3	1
	0	RNA	GAGAAAATAATGAATGTCAANNN	GAGAAAATcAaGAtTG-CAAGAG	2	25939137	+	3	1
	0	RNA	GAGAAAATAATGAATGTCAANNN	GAGAAAATtATGAcTc-CAAAAG	2	26260130	+	3	1
	0	RNA	GAGAAAATAATGAATGTCAANNN	GAGAAAATcATGAcTG-gAAAAG	2	11609174	+	3	1
	0	RNA	GAGAAAATAATGAATGTCAANNN	tAGAAAATAcTcAATG-CAAGAG	2	77046931	+	3	1
	0	RNA	GAGAAAATAATGAATGTCAANNN	GAGAAAAgAATGAATG-aAtGAG	2	87495357	+	3	1
	0	RNA	GAGAAAATAATGAATGTCAANNN	GAGAAAATAtTaAAaG-CAACAG	2	91312354	-	3	1
	0	RNA	GAGAAAATAATGAATGTCAANNN	GAGAAAATgATGAATG-CAAGGG	2	88499857	-	1	1
	0	RNA	GAGAAAATAATGAATGTCAANNN	GAGAAAATcATGAATG-aAATGG	2	40458582	+	2	1
	0	RNA	GAGAAAATAATGAATGTCAANNN	GAGAAAATtATGAATa-CAAAAG	2	93883256	-	2	1
	0	RNA	GAGAAAATAATGAATGTCAANNN	GAtAAAATAATcAATt-CAAAAG	2	94272015	+	3	1
	0	RNA	GAGAAAATAATGAATGTCAANNN	GAGAAAATAtTGAAaG-CAAGGG	2	109870916	+	2	1
	0	RNA	GAGAAAATAATGAATGTCAANNN	GAGAAAATAATGAcTG-aAAAAG	2	111969928	-	2	1
	0	RNA	GAGAAAATAATGAATGTCAANNN	aAGAAAATAATaAATG-aAAAAG	2	110260842	+	3	1
	0	RNA	GAGAAAATAATGAATGTCAANNN	aAGAAAATAcTGAATG-CcACAG	2	112806062	+	3	1
	0	RNA	GAGAAAATAATGAATGTCAANNN	GAGAAtATAAaGAATG-aAATAG	2	117951665	-	3	1
	0	RNA	GAGAAAATAATGAATGTCAANNN	GAGAAAAcAgcGAATG-CAATGG	2	130851019	+	3	1
	0	RNA	GAGAAAATAATGAATGTCAANNN	GAGAAAATAATtAAaG-aAACAG	2	130167682	-	3	1
	0	RNA	GAGAAAATAATGAATGTCAANNN	GAGAAAATctTGAATG-aAATGG	2	42432519	+	3	1
	0	RNA	GAGAAAATAATGAATGTCAANNN	aAGAAAATAATcAATG-aAATAG	2	142583203	-	3	1
	0	RNA	GAGAAAATAATGAATGTCAANNN	aAGAAAATAAgGcATG-CAAAGG	2	144351454	-	3	1
	0	RNA	GAGAAAATAATGAATGTCAANNN	GAGAAAATtATGAAac-CAAAAG	2	147152084	+	3	1
	0	RNA	GAGAAAATAATGAATGTCAANNN	GAtAAAATAcTGAATc-CAAAGG	2	150683758	-	3	1
	0	RNA	GAGAAAATAATGAATGTCAANNN	tAGAAAAgAATGAATGa-AAAAG	2	65775423	-	3	1
	0	RNA	GAGAAAATAATGAATGTCAANNN	aAGAAAAcAATaAATGT-AACAG	2	43689446	+	3	1
	0	RNA	GAGAAAATAATGAATGTCAANNN	aAGAAAATAATGAgTGT-AAAAG	2	51492209	-	2	1
	0	RNA	GAGAAAATAATGAATGTCAANNN	aAcAAAcTAATGAATGT-AAGAG	2	20391151	-	3	1
	0	RNA	GAGAAAATAATGAATGTCAANNN	aAGAAAATAATGAAgGT-gAAAG	2	36569950	+	3	1
	0	RNA	GAGAAAATAATGAATGTCAANNN	GgGgAAAaAATGAATGT-AAAGG	2	21347541	+	3	1
	0	RNA	GAGAAAATAATGAATGTCAANNN	GAGAAAAaAATcAATGa-AAGAG	2	70529101	-	3	1
	0	RNA	GAGAAAATAATGAATGTCAANNN	GtGAAAAaAATGAAaGT-AAAAG	2	37238645	-	3	1
	0	RNA	GAGAAAATAATGAATGTCAANNN	aAGAAAATAATGAcTGa-AATGG	2	39045487	-	3	1
	0	RNA	GAGAAAATAATGAATGTCAANNN	aAGAAAATtATGAATGT-gAAAG	2	56710581	+	3	1
	0	RNA	GAGAAAATAATGAATGTCAANNN	GAGAAAATcATGAATGa-AATGG	2	40458582	+	2	1
	0	RNA	GAGAAAATAATGAATGTCAANNN	GgcAAAATAATGAATaT-AAAAG	2	25412325	+	3	1
	0	RNA	GAGAAAATAATGAATGTCAANNN	GAGAAAAcAATtAATGT-AgGAG	2	5460461	-	3	1
	0	RNA	GAGAAAATAATGAATGTCAANNN	tAcAAAATAATGtATGT-AAGAG	2	34990722	+	3	1
	0	RNA	GAGAAAATAATGAATGTCAANNN	GAGAAAATctTGAATGa-AATGG	2	42432519	+	3	1
	0	RNA	GAGAAAATAATGAATGTCAANNN	GAGAAAAgAATGAATGa-AtGAG	2	87495357	+	3	1
	0	RNA	GAGAAAATAATGAATGTCAANNN	tAGcAAAaAATGAATGT-AATAG	2	90664363	+	3	1
	0	RNA	GAGAAAATAATGAATGTCAANNN	GAGAAAATcATGAcTGg-AAAAG	2	11609174	+	3	1
	0	RNA	GAGAAAATAATGAATGTCAANNN	GAGAAAATtATGAATac-AAAAG	2	93883256	-	3	1
	0	RNA	GAGAAAATAATGAATGTCAANNN	GgGAAAATAAaGAATaT-AATAG	2	99004666	+	3	1
	0	RNA	GAGAAAATAATGAATGTCAANNN	GAGAAAATgATGAATGc-AAGGG	2	88499857	-	2	1
	0	RNA	GAGAAAATAATGAATGTCAANNN	GAGAAAAgAtTGAAaGT-AACAG	2	97377189	+	3	1
	0	RNA	GAGAAAATAATGAATGTCAANNN	GAGAAAATAtTGAAaGc-AAGGG	2	109870916	+	3	1
	0	RNA	GAGAAAATAATGAATGTCAANNN	GAGAAAATAATGAcTGa-AAAAG	2	111969928	-	2	1
	0	RNA	GAGAAAATAATGAATGTCAANNN	aAGAAAATAATaAATGa-AAAAG	2	110260842	+	3	1
	0	RNA	GAGAAAATAATGAATGTCAANNN	aAGAAAATAAaGAcTGT-AACAG	2	117327408	+	3	1
	0	RNA	GAGAAAATAATGAATGTCAANNN	GAGAAtATAAaGAATGa-AATAG	2	117951665	-	3	1
	0	RNA	GAGAAAATAATGAATGTCAANNN	GAGAAgATAATGAAgtT-AAAGG	2	118281136	-	3	1
	0	RNA	GAGAAAATAATGAATGTCAANNN	GAaAAAATAtTGAATcT-AATAG	2	127875523	-	3	1
	0	RNA	GAGAAAATAATGAATGTCAANNN	cAGAAcAgAATGAATGT-AAGGG	2	119189604	-	3	1
	0	RNA	GAGAAAATAATGAATGTCAANNN	GAGAAAAgAATaAATGT-gATAG	2	126962400	-	3	1
	0	RNA	GAGAAAATAATGAATGTCAANNN	GAGAAAATAATaAtTtT-AAAAG	2	125407279	+	3	1
	0	RNA	GAGAAAATAATGAATGTCAANNN	GAGAAAATAATtAAaGa-AACAG	2	130167682	-	3	1
	0	RNA	GAGAAAATAATGAATGTCAANNN	cAcAAAATAATGAgTGT-AAGGG	2	138655550	+	3	1
	0	RNA	GAGAAAATAATGAATGTCAANNN	aAGAAAATAATcAATGa-AATAG	2	142583203	-	3	1
	0	RNA	GAGAAAATAATGAATGTCAANNN	GAGgAAAaAATGAAaGT-AAAAG	2	150019189	+	3	1
	0	RNA	GAGAAAATAATGAATGTCAANNN	GAtAAAAcAAaGAATGTC-ACAG	2	66730223	-	3	1
	0	RNA	GAGAAAATAATGAATGTCAANNN	aAGAAAATAATGAgTGTa-AAAG	2	51492209	-	3	1
	0	RNA	GAGAAAATAATGAATGTCAANNN	GAcAAAATAATGAAgcTC-AGAG	2	13264167	+	3	1
	0	RNA	GAGAAAATAATGAATGTCAANNN	aAGAAAATAATGAAgGTg-AAAG	2	36569950	+	3	1
	0	RNA	GAGAAAATAATGAATGTCAANNN	GAGAAAATAATaAAgaTC-AGAG	2	20872815	+	3	1
	0	RNA	GAGAAAATAATGAATGTCAANNN	GAGAgAATAATGgATGgC-ATAG	2	21374447	+	3	1
	0	RNA	GAGAAAATAATGAATGTCAANNN	GAtAAAAcAAaGAATGTC-ACAG	2	31100914	+	3	1
	0	RNA	GAGAAAATAATGAATGTCAANNN	GAGAAAATcATGAATGaa-ATGG	2	40458582	+	3	1
	0	RNA	GAGAAAATAATGAATGTCAANNN	aAGAAAATtATGAATGTg-AAAG	2	56710581	+	3	1
	0	RNA	GAGAAAATAATGAATGTCAANNN	GAGAAAAaAATtAcTGTC-ACAG	2	78527508	-	3	1
	0	RNA	GAGAAAATAATGAATGTCAANNN	aAtAAAATAATGcATGTC-AGGG	2	5688779	-	3	1
	0	RNA	GAGAAAATAATGAATGTCAANNN	GAGAgAAaAATGAATGTC-tGAG	2	80798439	+	3	1
	0	RNA	GAGAAAATAATGAATGTCAANNN	GAGAAAATgATGAATGca-AGGG	2	88499857	-	3	1
	0	RNA	GAGAAAATAATGAATGTCAANNN	aAGAAAATAATGcATtTC-AAAG	2	93195642	+	3	1
	0	RNA	GAGAAAATAATGAATGTCAANNN	GAGAAAATtATGtATaTC-ACAG	2	89621427	-	3	1
	0	RNA	GAGAAAATAATGAATGTCAANNN	aAGAAAAaAAgGAATGTC-AAGG	2	93588793	-	3	1
	0	RNA	GAGAAAATAATGAATGTCAANNN	GAaAAAATgATGAcTGTC-ACAG	2	104766610	+	3	1
	0	RNA	GAGAAAATAATGAATGTCAANNN	GAGAcAAaAATaAATGTC-ATAG	2	110989879	-	3	1
	0	RNA	GAGAAAATAATGAATGTCAANNN	GAGAAAATAATGAcTGaa-AAAG	2	111969928	-	3	1
	0	RNA	GAGAAAATAATGAATGTCAANNN	GAaAgAATAATGAATtTC-ACAG	2	119664670	+	3	1
	0	RNA	GAGAAAATAATGAATGTCAANNN	aAGAAAATAcTGAATGcC-ACAG	2	112806062	+	3	1
	0	RNA	GAGAAAATAATGAATGTCAANNN	GAcAAAAcAAaGAATGTC-AAGG	2	120839926	+	3	1
	0	RNA	GAGAAAATAATGAATGTCAANNN	GAtAAAAcAAaGAATGTC-ATGG	2	122426557	-	3	1
	0	RNA	GAGAAAATAATGAATGTCAANNN	GAGAAAATtATGAtTaTC-AAGG	2	124649257	-	3	1
	0	RNA	GAGAAAATAATGAATGTCAANNN	GAGAAAAgAATaAATGTg-ATAG	2	126962400	-	3	1
	0	RNA	GAGAAAATAATGAATGTCAANNN	GtGAAAAcAATGAAaGTC-AAGG	2	123065482	+	3	1
	0	RNA	GAGAAAATAATGAATGTCAANNN	GAGAAAATAcTGAAaaTC-AAAG	2	128356412	-	3	1
	0	RNA	GAGAAAATAATGAATGTCAANNN	GAGAAAATAATaAAgaTC-AGAG	2	125474821	-	3	1
	0	RNA	GAGAAAATAATGAATGTCAANNN	aAGAAAATtATGAATGgC-AAAG	2	134942862	+	3	1
	0	RNA	GAGAAAATAATGAATGTCAANNN	aAGAAAATAATtAATGaC-ATAG	2	142932572	+	3	1
	0	RNA	GAGAAAATAATGAATGTCAANNN	aAGAAAAaAATGAATGaC-AAGG	2	146672261	+	3	1
	0	RNA	GAGAAAATAATGAATGTCAANNN	GAGAAAATAATaAgTGTC-tTAG	2	150714364	+	3	1
	0	RNA	GAGAAAATAATGAATGTCAANNN	GAGAAAATcATGAcT-TgAAAAG	2	5643048	+	3	1
	0	RNA	GAGAAAATAATGAATGTCAANNN	aAGgAgATAATGAAT-TCAACAG	2	36365650	+	3	1
	0	RNA	GAGAAAATAATGAATGTCAANNN	GAcAAAATgATGgAT-TCAAAAG	2	44004209	+	3	1
	0	RNA	GAGAAAATAATGAATGTCAANNN	GgGAAgATAATGAAg-TCAACAG	2	20451020	-	3	1
	0	RNA	GAGAAAATAATGAATGTCAANNN	GcaAAAATAATGAAT-TgAAAAG	2	20806401	+	3	1
	0	RNA	GAGAAAATAATGAATGTCAANNN	GAGAAAATAATaAtT-TgAAAAG	2	37400829	+	3	1
	0	RNA	GAGAAAATAATGAATGTCAANNN	GAGAAAATcATGAcT-TgAAAAG	2	37503451	+	3	1
	0	RNA	GAGAAAATAATGAATGTCAANNN	GAGAAAATAAgGAAa-TCAAAAG	2	13364178	-	2	1
	0	RNA	GAGAAAATAATGAATGTCAANNN	GAGAAAAaAATagAT-TCAAAAG	2	38701920	+	3	1
	0	RNA	GAGAAAATAATGAATGTCAANNN	GAGAAAATAATtAtc-TCAAGGG	2	72673583	+	3	1
	0	RNA	GAGAAAATAATGAATGTCAANNN	GAaAtAATAATGAAa-TCAATAG	2	30567564	+	3	1
	0	RNA	GAGAAAATAATGAATGTCAANNN	cAGAAAATAATtAAT-cCAATGG	2	14447677	+	3	1
	0	RNA	GAGAAAATAATGAATGTCAANNN	GAGAAAATcATGAAT-gaAATGG	2	40458582	+	3	1
	0	RNA	GAGAAAATAATGAATGTCAANNN	GAaAAAATtATGAtT-TCAATAG	2	54934039	-	3	1
	0	RNA	GAGAAAATAATGAATGTCAANNN	GAaAAAATgATGAAT-TaAAAAG	2	75478380	+	3	1
	0	RNA	GAGAAAATAATGAATGTCAANNN	GAGAAAATcATGAtT-TgAAAAG	2	55350812	+	3	1
	0	RNA	GAGAAAATAATGAATGTCAANNN	cAGAAAATAAatAAT-TCAACAG	2	55775520	+	3	1
	0	RNA	GAGAAAATAATGAATGTCAANNN	GgGAAAATgATGcAT-TCAAGGG	2	63081314	-	3	1
	0	RNA	GAGAAAATAATGAATGTCAANNN	GAGAAAAgAAaaAAT-TCAATAG	2	49480159	-	3	1
	0	RNA	GAGAAAATAATGAATGTCAANNN	GAGAAAATcATGAcT-TgAAAAG	2	57180856	-	3	1
	0	RNA	GAGAAAATAATGAATGTCAANNN	GAGAAAATtATGAcT-cCAAAAG	2	26260130	+	3	1
	0	RNA	GAGAAAATAATGAATGTCAANNN	aAaAAAAaAATGAAT-TCAAGAG	2	88113338	-	3	1
	0	RNA	GAGAAAATAATGAATGTCAANNN	cAGAAAtTAATGAAT-TCgATAG	2	35068438	-	3	1
	0	RNA	GAGAAAATAATGAATGTCAANNN	GAGAAAATgATGAAT-gCAAGGG	2	88499857	-	2	1
	0	RNA	GAGAAAATAATGAATGTCAANNN	GAGAAAATtATGAAT-aCAAAAG	2	93883256	-	2	1
	0	RNA	GAGAAAATAATGAATGTCAANNN	GAtAAAATAATcAAT-TCAAAAG	2	94272015	+	2	1
	0	RNA	GAGAAAATAATGAATGTCAANNN	GAGAAAAaAAcGtAT-TCAACAG	2	99921908	+	3	1
	0	RNA	GAGAAAATAATGAATGTCAANNN	GgGAAAATgATGAcT-TCAACGG	2	17869903	+	3	1
	0	RNA	GAGAAAATAATGAATGTCAANNN	GAGAAAATAtTGAAa-gCAAGGG	2	109870916	+	3	1
	0	RNA	GAGAAAATAATGAATGTCAANNN	GAGAAAATAATGAcT-gaAAAAG	2	111969928	-	3	1
	0	RNA	GAGAAAATAATGAATGTCAANNN	cAGAgAATAATGAAa-TCAAAAG	2	113055565	+	3	1
	0	RNA	GAGAAAATAATGAATGTCAANNN	GAGAAAATcATGAcT-TgAAAGG	2	111741710	-	3	1
	0	RNA	GAGAAAATAATGAATGTCAANNN	GAcAAAATAATGgAT-TaAAAAG	2	120750864	-	3	1
	0	RNA	GAGAAAATAATGAATGTCAANNN	aAGAAAtTAATcAAT-TCAATGG	2	123733343	-	3	1
	0	RNA	GAGAAAATAATGAATGTCAANNN	GAatAAATAATtAAT-TCAATGG	2	124878804	-	3	1
	0	RNA	GAGAAAATAATGAATGTCAANNN	GAGAAgATAATGAAg-TtAAAGG	2	118281136	-	3	1
	0	RNA	GAGAAAATAATGAATGTCAANNN	GAGAAAATAATaAtT-TtAAAAG	2	125407279	+	3	1
	0	RNA	GAGAAAATAATGAATGTCAANNN	GAtAAAAcAATGAtT-TCAATGG	2	129148529	+	3	1
	0	RNA	GAGAAAATAATGAATGTCAANNN	tAGAAAATAATtcAT-TCAACAG	2	131611883	-	3	1
	0	RNA	GAGAAAATAATGAATGTCAANNN	GAaAAAATAATGAgT-TgAAGGG	2	134841479	-	3	1
	0	RNA	GAGAAAATAATGAATGTCAANNN	GAGAAAATtATGAAa-cCAAAAG	2	147152084	+	3	1
	0	RNA	GAGAAAATAATGAATGTCAANNN	GAtAAAATAcTGAAT-cCAAAGG	2	150683758	-	3	1
	0	RNA	GAGAAAATAATGAATGTCAANNN	GAGAgAAaAATG-ATGTgAATAG	2	35741823	+	3	1
	0	RNA	GAGAAAATAATGAATGTCAANNN	GAGAgAAaAATGA-TGTgAATAG	2	35741823	+	3	1
	0	RNA	GAGAAAATAATGAATGTCAANNN	GAGAAAATAATG-tTaTaAATAG	2	12945377	+	3	1
	0	RNA	GAGAAAATAATGAATGTCAANNN	GAGAAAATAATGt-TaTaAATAG	2	12945377	+	3	1
	0	RNA	GAGAAAATAATGAATGTCAANNN	GAGAAAAaAATG-ATGaCcAGGG	2	68550803	-	3	1
	0	RNA	GAGAAAATAATGAATGTCAANNN	GAGAAAAaAATGA-TGaCcAGGG	2	68550803	-	3	1
	0	RNA	GAGAAAATAATGAATGTCAANNN	GgGAAgATAATG-AaGTCAACAG	2	20451020	-	3	1
	0	RNA	GAGAAAATAATGAATGTCAANNN	GgGAAgATAATGA-aGTCAACAG	2	20451020	-	3	1
	0	RNA	GAGAAAATAATGAATGTCAANNN	GAGAAAATAAgG-AaaTCAAAAG	2	13364178	-	3	1
	0	RNA	GAGAAAATAATGAATGTCAANNN	GAGAAAATAAgGA-aaTCAAAAG	2	13364178	-	3	1
	0	RNA	GAGAAAATAATGAATGTCAANNN	GAGAAAATAATa-ATtTgAAAAG	2	37400829	+	3	1
	0	RNA	GAGAAAATAATGAATGTCAANNN	GAGAAAATAATaA-TtTgAAAAG	2	37400829	+	3	1
	0	RNA	GAGAAAATAATGAATGTCAANNN	aAGAAAATAATG-ATcTCAcCAG	2	30003090	-	3	1
	0	RNA	GAGAAAATAATGAATGTCAANNN	aAGAAAATAATGA-TcTCAcCAG	2	30003090	-	3	1
	0	RNA	GAGAAAATAATGAATGTCAANNN	GAGAAAATAATt-ATcTCAAGGG	2	72673583	+	2	1
	0	RNA	GAGAAAATAATGAATGTCAANNN	GAGAAAATAATtA-TcTCAAGGG	2	72673583	+	2	1
	0	RNA	GAGAAAATAATGAATGTCAANNN	GAGAAAATAATt-tTGTgAAGAG	2	23057459	-	3	1
	0	RNA	GAGAAAATAATGAATGTCAANNN	GAGAAAATAATtt-TGTgAAGAG	2	23057459	-	3	1
	0	RNA	GAGAAAATAATGAATGTCAANNN	GAGAAAATgcTG-ATGTgAAAAG	2	8590529	-	3	1
	0	RNA	GAGAAAATAATGAATGTCAANNN	GAGAAAATgcTGA-TGTgAAAAG	2	8590529	-	3	1
	0	RNA	GAGAAAATAATGAATGTCAANNN	GAaAAAATtATG-ATtTCAATAG	2	54934039	-	3	1
	0	RNA	GAGAAAATAATGAATGTCAANNN	GAaAAAATtATGA-TtTCAATAG	2	54934039	-	3	1
	0	RNA	GAGAAAATAATGAATGTCAANNN	aAGAtAATtATG-ATGTCAAAGG	2	15892746	+	3	1
	0	RNA	GAGAAAATAATGAATGTCAANNN	aAGAtAATtATGA-TGTCAAAGG	2	15892746	+	3	1
	0	RNA	GAGAAAATAATGAATGTCAANNN	GAGAAAATcATG-ATtTgAAAAG	2	55350812	+	3	1
	0	RNA	GAGAAAATAATGAATGTCAANNN	GAGAAAATcATGA-TtTgAAAAG	2	55350812	+	3	1
	0	RNA	GAGAAAATAATGAATGTCAANNN	tgGAAAAcAATG-ATGTCAATAG	2	16269633	-	3	1
	0	RNA	GAGAAAATAATGAATGTCAANNN	tgGAAAAcAATGA-TGTCAATAG	2	16269633	-	3	1
	0	RNA	GAGAAAATAATGAATGTCAANNN	GAtAAtATAATG-ATGaCAACAG	2	23785686	-	3	1
	0	RNA	GAGAAAATAATGAATGTCAANNN	GAtAAtATAATGA-TGaCAACAG	2	23785686	-	3	1
	0	RNA	GAGAAAATAATGAATGTCAANNN	tAtAAAATAATG-ATGTaAAGAG	2	24029126	-	3	1
	0	RNA	GAGAAAATAATGAATGTCAANNN	tAtAAAATAATGA-TGTaAAGAG	2	24029126	-	3	1
	0	RNA	GAGAAAATAATGAATGTCAANNN	cAGAAAATAcTG-ATGTaAATAG	2	101355800	+	3	1
	0	RNA	GAGAAAATAATGAATGTCAANNN	cAGAAAATAcTGA-TGTaAATAG	2	101355800	+	3	1
	0	RNA	GAGAAAATAATGAATGTCAANNN	GAGAAgATAATG-AaGTtAAAGG	2	118281136	-	3	1
	0	RNA	GAGAAAATAATGAATGTCAANNN	GAGAAgATAATGA-aGTtAAAGG	2	118281136	-	3	1
	0	RNA	GAGAAAATAATGAATGTCAANNN	GAGAAAATAATa-ATtTtAAAAG	2	125407279	+	3	1
	0	RNA	GAGAAAATAATGAATGTCAANNN	GAGAAAATAATaA-TtTtAAAAG	2	125407279	+	3	1
	0	RNA	GAGAAAATAATGAATGTCAANNN	GAtAAAAcAATG-ATtTCAATGG	2	129148529	+	3	1
	0	RNA	GAGAAAATAATGAATGTCAANNN	GAtAAAAcAATGA-TtTCAATGG	2	129148529	+	3	1
	0	RNA	GAGAAAATAATGAATGTCAANNN	cAGAAAAcAATG-ATGTCtAGGG	2	131444694	-	3	1
	0	RNA	GAGAAAATAATGAATGTCAANNN	cAGAAAAcAATGA-TGTCtAGGG	2	131444694	-	3	1
	0	RNA	GAGAAAATAATGAATGTCAANNN	GAGAAAAgAATG-ATGgaAAAGG	2	142217337	-	3	1
	0	RNA	GAGAAAATAATGAATGTCAANNN	GAGAAAAgAATGA-TGgaAAAGG	2	142217337	-	3	1
	0	RNA	GAGAAAATAATGAATGTCAANNN	GAGAAAATAATt-AgGaCAACAG	2	144155480	-	3	1
	0	RNA	GAGAAAATAATGAATGTCAANNN	GAGAAAATAATtA-gGaCAACAG	2	144155480	-	3	1
	0	RNA	GAGAAAATAATGAATGTCAANNN	GAGAAAcT-ATGAATGTaAgCAG	2	66696138	-	3	1
	0	RNA	GAGAAAATAATGAATGTCAANNN	GAGAAAcTA-TGAATGTaAgCAG	2	66696138	-	3	1
	0	RNA	GAGAAAATAATGAATGTCAANNN	GAGAcAAT-ATGAATGTCAcAGG	2	71099428	+	2	1
	0	RNA	GAGAAAATAATGAATGTCAANNN	GAGAcAATA-TGAATGTCAcAGG	2	71099428	+	2	1
	0	RNA	GAGAAAATAATGAATGTCAANNN	GAGAAAtT-ATGAcTGTaAAAAG	2	21828703	+	3	1
	0	RNA	GAGAAAATAATGAATGTCAANNN	GAGAAAtTA-TGAcTGTaAAAAG	2	21828703	+	3	1
	0	RNA	GAGAAAATAATGAATGTCAANNN	GAaAAAAT-cTGAATGTCtATAG	2	15223309	+	3	1
	0	RNA	GAGAAAATAATGAATGTCAANNN	GAaAAAATc-TGAATGTCtATAG	2	15223309	+	3	1
	0	RNA	GAGAAAATAATGAATGTCAANNN	GAGAAAAg-ATGAATGTCAtTGG	2	46480125	-	2	1
	0	RNA	GAGAAAATAATGAATGTCAANNN	GAGAAAAgA-TGAATGTCAtTGG	2	46480125	-	2	1
	0	RNA	GAGAAAATAATGAATGTCAANNN	GAGAAAAT-ATGAAaGcaAAAGG	2	46653731	+	3	1
	0	RNA	GAGAAAATAATGAATGTCAANNN	GAGAAAATA-TGAAaGcaAAAGG	2	46653731	+	3	1
	0	RNA	GAGAAAATAATGAATGTCAANNN	cAaAAgAT-ATGAATGTCAATAG	2	41264609	-	3	1
	0	RNA	GAGAAAATAATGAATGTCAANNN	cAaAAgATA-TGAATGTCAATAG	2	41264609	-	3	1
	0	RNA	GAGAAAATAATGAATGTCAANNN	GAGAAAAT-ATcAATtcCAAAAG	2	89012371	+	3	1
	0	RNA	GAGAAAATAATGAATGTCAANNN	GAGAAAATA-TcAATtcCAAAAG	2	89012371	+	3	1
	0	RNA	GAGAAAATAATGAATGTCAANNN	GAtAAAAT-ATGAATGTaAAAAG	2	95919851	+	2	1
	0	RNA	GAGAAAATAATGAATGTCAANNN	GAtAAAATA-TGAATGTaAAAAG	2	95919851	+	2	1
	0	RNA	GAGAAAATAATGAATGTCAANNN	GAGAAAAT-ATaAATGcaAAAAG	2	91662431	+	3	1
	0	RNA	GAGAAAATAATGAATGTCAANNN	GAGAAAATA-TaAATGcaAAAAG	2	91662431	+	3	1
	0	RNA	GAGAAAATAATGAATGTCAANNN	GAcAcAAT-cTGAATGTCAAAGG	2	96129129	-	3	1
	0	RNA	GAGAAAATAATGAATGTCAANNN	GAcAcAATc-TGAATGTCAAAGG	2	96129129	-	3	1
	0	RNA	GAGAAAATAATGAATGTCAANNN	GAGAAcAT-ATGcATaTCAAAAG	2	102046838	-	3	1
	0	RNA	GAGAAAATAATGAATGTCAANNN	GAGAAcATA-TGcATaTCAAAAG	2	102046838	-	3	1
	0	RNA	GAGAAAATAATGAATGTCAANNN	GAGAAAAT-gaGAATGTaAAAAG	2	113498837	-	3	1
	0	RNA	GAGAAAATAATGAATGTCAANNN	GAGAAAATg-aGAATGTaAAAAG	2	113498837	-	3	1
	0	RNA	GAGAAAATAATGAATGTCAANNN	GAaAAAAT-ATaAAaGTCAAAAG	2	116243353	+	3	1
	0	RNA	GAGAAAATAATGAATGTCAANNN	GAaAAAATA-TaAAaGTCAAAAG	2	116243353	+	3	1
	0	RNA	GAGAAAATAATGAATGTCAANNN	GAcAAAAT-ATGAtTGTCAtTGG	2	113624286	+	3	1
	0	RNA	GAGAAAATAATGAATGTCAANNN	GAcAAAATA-TGAtTGTCAtTGG	2	113624286	+	3	1
	0	RNA	GAGAAAATAATGAATGTCAANNN	GAGAAAAg-ATGtATGTaAACAG	2	115596159	-	3	1
	0	RNA	GAGAAAATAATGAATGTCAANNN	GAGAAAAgA-TGtATGTaAACAG	2	115596159	-	3	1
	0	RNA	GAGAAAATAATGAATGTCAANNN	aAcAAAAT-ATGAATGTaAAAAG	2	138489422	+	3	1
	0	RNA	GAGAAAATAATGAATGTCAANNN	aAcAAAATA-TGAATGTaAAAAG	2	138489422	+	3	1
	0	RNA	GAGAAAATAATGAATGTCAANNN	GtGAAgAT-ATGAATaTCAAAAG	2	133799180	-	3	1
	0	RNA	GAGAAAATAATGAATGTCAANNN	GtGAAgATA-TGAATaTCAAAAG	2	133799180	-	3	1
	0	RNA	GAGAAAATAATGAATGTCAANNN	GAGAAAAT-ATcAAaGgCAAGAG	2	146717864	+	3	1
	0	RNA	GAGAAAATAATGAATGTCAANNN	GAGAAAATA-TcAAaGgCAAGAG	2	146717864	+	3	1
	0	RNA	GAGAAAATAATGAATGTCAANNN	GAa-AAATAgTGAATGTCcATAG	2	1027008	-	3	1
	0	RNA	GAGAAAATAATGAATGTCAANNN	GAaA-AATAgTGAATGTCcATAG	2	1027008	-	3	1
	0	RNA	GAGAAAATAATGAATGTCAANNN	GAaAA-ATAgTGAATGTCcATAG	2	1027008	-	3	1
	0	RNA	GAGAAAATAATGAATGTCAANNN	GAaAAA-TAgTGAATGTCcATAG	2	1027008	-	3	1
	0	RNA	GAGAAAATAATGAATGTCAANNN	tAG-AAATAATccATGTCAAAAG	2	45295082	-	3	1
	0	RNA	GAGAAAATAATGAATGTCAANNN	tAGA-AATAATccATGTCAAAAG	2	45295082	-	3	1
	0	RNA	GAGAAAATAATGAATGTCAANNN	tAGAA-ATAATccATGTCAAAAG	2	45295082	-	3	1
	0	RNA	GAGAAAATAATGAATGTCAANNN	tAGAAA-TAATccATGTCAAAAG	2	45295082	-	3	1
	0	RNA	GAGAAAATAATGAATGTCAANNN	GAG-AAATtATGAcTGTaAAAAG	2	21828703	+	3	1
	0	RNA	GAGAAAATAATGAATGTCAANNN	GAGA-AATtATGAcTGTaAAAAG	2	21828703	+	3	1
	0	RNA	GAGAAAATAATGAATGTCAANNN	GAGAA-ATtATGAcTGTaAAAAG	2	21828703	+	3	1
	0	RNA	GAGAAAATAATGAATGTCAANNN	GAGAAA-TtATGAcTGTaAAAAG	2	21828703	+	3	1
	0	RNA	GAGAAAATAATGAATGTCAANNN	tAG-AAATAATGgcTGTCAAAAG	2	38444306	+	3	1
	0	RNA	GAGAAAATAATGAATGTCAANNN	tAGA-AATAATGgcTGTCAAAAG	2	38444306	+	3	1
	0	RNA	GAGAAAATAATGAATGTCAANNN	tAGAA-ATAATGgcTGTCAAAAG	2	38444306	+	3	1
	0	RNA	GAGAAAATAATGAATGTCAANNN	tAGAAA-TAATGgcTGTCAAAAG	2	38444306	+	3	1
	0	RNA	GAGAAAATAATGAATGTCAANNN	GAG-AAAagATGAATGTCAtTGG	2	46480125	-	3	1
	0	RNA	GAGAAAATAATGAATGTCAANNN	GAGA-AAagATGAATGTCAtTGG	2	46480125	-	3	1
[truncated: 9,637 more rows]
