# Supplementary material for: Genome-wide genetic mutations accumulated in genome-edited pigs and their filial generation for xenotransplantation
Source: Research Square preprint supplement (doi:10.21203/rs.3.rs-3139100/v1), 2023-07-18
Supplement: Supplementary file 1 [file 5b6e904f5b86a0fa3684a4d8.pdf]

## Reporting Summary

Nature Portfolio wishes to improve the reproducibility of the work that we publish. This form provides structure for consistency and transparency in reporting. For further information on Nature Portfolio policies, see our [Editorial Policies](#) and the [Editorial Policy Checklist](#).

### Statistics

For all statistical analyses, confirm that the following items are present in the figure legend, table legend, main text, or Methods section.

n/a Confirmed

- ☐ ☒ The exact sample size ( $n$ ) for each experimental group/condition, given as a discrete number and unit of measurement
- ☐ ☒ A statement on whether measurements were taken from distinct samples or whether the same sample was measured repeatedly
- ☐ ☒ The statistical test(s) used AND whether they are one- or two-sided  
*Only common tests should be described solely by name; describe more complex techniques in the Methods section.*
- ☐ ☒ A description of all covariates tested
- ☐ ☒ A description of any assumptions or corrections, such as tests of normality and adjustment for multiple comparisons
- ☐ ☒ A full description of the statistical parameters including central tendency (e.g. means) or other basic estimates (e.g. regression coefficient) AND variation (e.g. standard deviation) or associated estimates of uncertainty (e.g. confidence intervals)
- ☐ ☒ For null hypothesis testing, the test statistic (e.g.  $F$ ,  $t$ ,  $r$ ) with confidence intervals, effect sizes, degrees of freedom and  $P$  value noted  
*Give  $P$  values as exact values whenever suitable.*
- ☐ ☒ For Bayesian analysis, information on the choice of priors and Markov chain Monte Carlo settings
- ☐ ☒ For hierarchical and complex designs, identification of the appropriate level for tests and full reporting of outcomes
- ☐ ☒ Estimates of effect sizes (e.g. Cohen's  $d$ , Pearson's  $r$ ), indicating how they were calculated

Our web collection on [statistics for biologists](#) contains articles on many of the points above.

### Software and code

Policy information about [availability of computer code](#)

Data collection

Sus scrofa genome was download from NCBI database ([http://ftp.ensembl.org/pub/release-103/fasta/sus\\_scrofa/dna/Sus\\_scrofa.Sscrofa11.1.dna.toplevel.fa](http://ftp.ensembl.org/pub/release-103/fasta/sus_scrofa/dna/Sus_scrofa.Sscrofa11.1.dna.toplevel.fa)); The public single nucleotide variants (SNV) of Sus scrofa was downloaded from dbSNP database ([https://ftp.ncbi.nih.gov/snp/pre\\_build152/organisms/archive/pig\\_9823/VCF/00-All.vcf.gz](https://ftp.ncbi.nih.gov/snp/pre_build152/organisms/archive/pig_9823/VCF/00-All.vcf.gz))

Data analysis

FastQC(v 0.11.5, <https://www.bioinformatics.babraham.ac.uk/projects/FastQC/>)  
 MultiQC(v1.10.1, <https://github.com/ewels/MultiQC/>)  
 BWA (v 0.7.15, <https://bio-BWA.sourceforge.net/>)  
 Qualimap (v 2.1.2, <http://qualimap.conesalab.org>)  
 R (v 4.2.1, <https://www.r-project.org/>)  
 plink( <https://www.cog-genomics.org/plink/>)  
 GATK (v 4.1.8.0, <https://gatk.broadinstitute.org/>)  
 Manta (v1.6.0 <https://github.com/Illumina/Manta/>)  
 Strelka(v 2.2.9.10, <https://github.com/Illumina/strelka/>)  
 VarScan(v 2.2.4.2, <https://varscan.sourceforge.net/>)  
 Delly (v 0.8.1, <https://github.com/Dellytools/Delly/>)  
 htlib (v 1.12, <https://github.com/samtools/htlib/>)  
 samtools (v 1.3, <https://github.com/samtools/>)  
 bcftools (v 1.14, <https://samtools.github.io/bcftools/bcftools.html>)  
 Platypus( - <https://github.com/andyrimmer/Platypus/>)  
 Freebayes (v 1.3.6, <https://github.com/freebayes/freebayes/>)

SURVIVOR (v 1.0.6, <https://github.com/fritzsedlazeck/SURVIVOR/>)  
 IGV (v 2.8.0, <https://software.broadinstitute.org/software/igv/>)  
 TrioDeNovo (v 0.06, <https://genome.sph.umich.edu/wiki/Triodenovo/>)  
 SnpEff (v 5.0e, <http://pcingola.github.io/SnpEff/>)  
 MSIsensor (v 0.6, <https://github.com/ding-lab/msisensor/>)  
 Python (v 3.9.7, <https://www.python.org/>)

For manuscripts utilizing custom algorithms or software that are central to the research but not yet described in published literature, software must be made available to editors and reviewers. We strongly encourage code deposition in a community repository (e.g. GitHub). See the Nature Portfolio [guidelines for submitting code & software](#) for further information.

## Data

Policy information about [availability of data](#)

All manuscripts must include a [data availability statement](#). This statement should provide the following information, where applicable:

- Accession codes, unique identifiers, or web links for publicly available datasets
- A description of any restrictions on data availability
- For clinical datasets or third party data, please ensure that the statement adheres to our [policy](#)

The sequencing data generated in this study was all deposited in NCBI BioProject (Accession code: PRJNA915800). All other data are available from the authors upon reasonable request.

## Research involving human participants, their data, or biological material

Policy information about studies with [human participants or human data](#). See also policy information about [sex, gender \(identity/presentation\), and sexual orientation](#) and [race, ethnicity and racism](#).

Reporting on sex and gender

None.

Reporting on race, ethnicity, or other socially relevant groupings

None.

Population characteristics

None.

Recruitment

None.

Ethics oversight

None.

Note that full information on the approval of the study protocol must also be provided in the manuscript.

## Field-specific reporting

Please select the one below that is the best fit for your research. If you are not sure, read the appropriate sections before making your selection.

☒ Life sciences ☐ Behavioural & social sciences ☐ Ecological, evolutionary & environmental sciences

For a reference copy of the document with all sections, see [nature.com/documents/nr-reporting-summary-flat.pdf](https://nature.com/documents/nr-reporting-summary-flat.pdf)

## Life sciences study design

All studies must disclose on these points even when the disclosure is negative.

Sample size

We studied 10 pigs with no sample-size calculation. The sample size was determined by ethics of animal use.

Data exclusions

No data were excluded.

Replication

All replication of experiments in our study stated in the manuscript.

Randomization

Randomization is not relevant to this study for we used GTKO pig and the wild-type pig.

Blinding

Not applicable.

## Reporting for specific materials, systems and methods

We require information from authors about some types of materials, experimental systems and methods used in many studies. Here, indicate whether each material, system or method listed is relevant to your study. If you are not sure if a list item applies to your research, read the appropriate section before selecting a response.

## Materials &amp; experimental systems

|                                     |                                                                 |
|-------------------------------------|-----------------------------------------------------------------|
| n/a                                 | Involvement in the study                                        |
| <input checked="" type="checkbox"/> | <input type="checkbox"/> Antibodies                             |
| <input checked="" type="checkbox"/> | <input type="checkbox"/> Eukaryotic cell lines                  |
| <input checked="" type="checkbox"/> | <input type="checkbox"/> Palaeontology and archaeology          |
| <input type="checkbox"/>            | <input checked="" type="checkbox"/> Animals and other organisms |
| <input checked="" type="checkbox"/> | <input type="checkbox"/> Clinical data                          |
| <input checked="" type="checkbox"/> | <input type="checkbox"/> Dual use research of concern           |
| <input checked="" type="checkbox"/> | <input type="checkbox"/> Plants                                 |

## Methods

|                                     |                                                 |
|-------------------------------------|-------------------------------------------------|
| n/a                                 | Involvement in the study                        |
| <input checked="" type="checkbox"/> | <input type="checkbox"/> ChIP-seq               |
| <input checked="" type="checkbox"/> | <input type="checkbox"/> Flow cytometry         |
| <input checked="" type="checkbox"/> | <input type="checkbox"/> MRI-based neuroimaging |

## Animals and other research organisms

Policy information about [studies involving animals](#); [ARRIVE guidelines](#) recommended for reporting animal research, and [Sex and Gender in Research](#)

|                         |                                                                                                                                            |
|-------------------------|--------------------------------------------------------------------------------------------------------------------------------------------|
| Laboratory animals      | Wu Zhi Shan Pigs, adult, both female and male.                                                                                             |
| Wild animals            | The study did not involve wild animals.                                                                                                    |
| Reporting on sex        | No sex based analysis.                                                                                                                     |
| Field-collected samples | None.                                                                                                                                      |
| Ethics oversight        | This study was approved by the Animal Experiments and Experimental Animal Welfare Committee of Capital Medical University (AEEI-2020-001). |

Note that full information on the approval of the study protocol must also be provided in the manuscript.
