# Supplementary material for: Genome-wide genetic mutations accumulated in genome-edited pigs and their filial generation for xenotransplantation
Source: Research Square preprint supplement (doi:10.21203/rs.3.rs-3139100/v1), 2023-07-18
Supplement: Supplementary file 2 [file 439b19ed2ca9991c0d51511e.xlsx]

## Sheet: Sheet1
	Supplemental Data 1 | Short mutations accumulated in CRISPR/Cas9 step and Nuclear/Transfer step of the pigs.
	chrom	locus	ref	alt	VAF	case	step	fix_type	annotation	annotation_Impact	gene_name	gene_id	type
	1	2165098	G	T	0.5	F0-657	edited_step	fix	downstream_gene_variant	MODIFIER	ENSSSCG00000004024	ENSSSCG00000004024	snv
	1	2739003	T	A	0.5	F0-657	edited_step	fix	intergenic_region	MODIFIER	TBXT-ENSSSCG00000036448	ENSSSCG00000036609-ENSSSCG00000036448	snv
	1	3193682	T	A	0.557692	F0-657	nuclear_transfor_step	fix	intron_variant	MODIFIER	PDE10A	ENSSSCG00000004027	snv
	1	3349539	C	G	0.519231	F0-657	edited_step	fix	intron_variant	MODIFIER	PDE10A	ENSSSCG00000004027	snv
	1	3470542	G	A	0.518182	F0-657	edited_step	fix	intergenic_region	MODIFIER	PDE10A-ENSSSCG00000044274	ENSSSCG00000004027-ENSSSCG00000044274	snv
	1	3563559	G	C	0.00869565	F0-657	isolation_step	fix	intergenic_region	MODIFIER	PDE10A-ENSSSCG00000044274	ENSSSCG00000004027-ENSSSCG00000044274	snv
	1	5185041	C	G	0.489209	F0-657	edited_step	fix	intron_variant	MODIFIER	PACRG	ENSSSCG00000038153	snv
	1	5861044	G	A	0.443478	F0-657	edited_step	fix	intron_variant	MODIFIER	PRKN	ENSSSCG00000004032	snv
	1	6164366	C	T	0.0365854	F0-657	edited_step	fix	intron_variant	MODIFIER	PRKN	ENSSSCG00000004032	snv
	1	11068269	T	C	0.227273	F0-657	edited_step	fix	intergenic_region	MODIFIER	ENSSSCG00000051255-ENSSSCG00000044169	ENSSSCG00000051255-ENSSSCG00000044169	snv
	1	11150514	A	G	0.38835	F0-657	edited_step	fix	intergenic_region	MODIFIER	ENSSSCG00000051255-ENSSSCG00000044169	ENSSSCG00000051255-ENSSSCG00000044169	snv
	1	12585869	T	G	0.356322	F0-657	edited_step	fix	intron_variant	MODIFIER	ENSSSCG00000046319	ENSSSCG00000046319	snv
	1	14582958	T	G	0.0102041	F0-657	edited_step	fix	intron_variant	MODIFIER	CCDC170	ENSSSCG00000004087	snv
	1	15414635	A	T	0.0416667	F0-657	edited_step	fix	intron_variant	MODIFIER	PLEKHG1	ENSSSCG00000032778	snv
	1	18787732	C	G	0.0491803	F0-657	edited_step	fix	intergenic_region	MODIFIER	ENSSSCG00000051595-RAB32	ENSSSCG00000051595-ENSSSCG00000004114	snv
	1	19978690	G	C	0.5	F0-657	edited_step	fix	intron_variant	MODIFIER	FBXO30	ENSSSCG00000004121	snv
	1	21676007	T	C	0.488372	F0-657	edited_step	fix	intron_variant	MODIFIER	PHACTR2	ENSSSCG00000004132	snv
	1	23098124	C	T	0.505882	F0-657	edited_step	fix	intergenic_region	MODIFIER	ENSSSCG00000046585-ENSSSCG00000049679	ENSSSCG00000046585-ENSSSCG00000049679	snv
	1	24892307	A	C	0.0121951	F0-657	edited_step	fix	intergenic_region	MODIFIER	ENSSSCG00000042331-U6	ENSSSCG00000042331-ENSSSCG00000036890	snv
	1	25918147	A	G	0.534247	F0-657	edited_step	fix	upstream_gene_variant	MODIFIER	NHSL1	ENSSSCG00000004149	snv
	1	26089499	T	C	0.0173913	F0-657	isolation_step	fix	upstream_gene_variant	MODIFIER	ENSSSCG00000046952	ENSSSCG00000046952	snv
	1	29728116	G	T	0.488889	F0-657	nuclear_transfor_step	fix	intron_variant	MODIFIER	SGK1	ENSSSCG00000021443	snv
	1	33254720	C	A	0.544776	F0-657	nuclear_transfor_step	fix	intron_variant	MODIFIER	L3MBTL3	ENSSSCG00000004203	snv
	1	34007012	T	C	0.554545	F0-657	nuclear_transfor_step	fix	intron_variant	MODIFIER	ENSSSCG00000004207	ENSSSCG00000004207	snv
	1	35728099	C	A	0.552083	F0-657	edited_step	fix	intron_variant	MODIFIER	ENSSSCG00000038602	ENSSSCG00000038602	snv
	1	37404314	C	T	0.563636	F0-657	nuclear_transfor_step	fix	intergenic_region	MODIFIER	HEY2-ENSSSCG00000050365	ENSSSCG00000004223-ENSSSCG00000050365	snv
	1	37984906	T	A	0.00925926	F0-657	isolation_step	fix	intergenic_region	MODIFIER	ENSSSCG00000051186-NKAIN2	ENSSSCG00000051186-ENSSSCG00000036607	snv
	1	38927092	T	G	0.486842	F0-657	edited_step	fix	intron_variant	MODIFIER	NKAIN2	ENSSSCG00000036607	snv
	1	38927122	T	G	0.445946	F0-657	edited_step	fix	intron_variant	MODIFIER	NKAIN2	ENSSSCG00000036607	snv
	1	39177073	G	C	0.232143	F0-657	edited_step	fix	upstream_gene_variant	MODIFIER	TRDN	ENSSSCG00000027613	snv
	1	39656514	T	C	0.030303	F0-657	isolation_step	fix	intergenic_region	MODIFIER	TRDN-ENSSSCG00000046850	ENSSSCG00000027613-ENSSSCG00000046850	snv
	1	41888256	A	G	0.458716	F0-657	nuclear_transfor_step	fix	intergenic_region	MODIFIER	ENSSSCG00000050869-ENSSSCG00000041950	ENSSSCG00000050869-ENSSSCG00000041950	snv
	1	43940597	T	G	0.537037	F0-657	nuclear_transfor_step	fix	downstream_gene_variant	MODIFIER	ENSSSCG00000042072	ENSSSCG00000042072	snv
	1	46219926	T	G	0.0428571	F0-657	edited_step	fix	intergenic_region	MODIFIER	ENSSSCG00000049526-ENSSSCG00000004269	ENSSSCG00000049526-ENSSSCG00000004269	snv
	1	46280497	T	G	0.0169492	F0-657	isolation_step	fix	intergenic_region	MODIFIER	ENSSSCG00000049526-ENSSSCG00000004269	ENSSSCG00000049526-ENSSSCG00000004269	snv
	1	46731480	A	T	0.36	F0-657	nuclear_transfor_step	fix	intergenic_region	MODIFIER	ENSSSCG00000050391-U6	ENSSSCG00000050391-ENSSSCG00000020480	snv
	1	47013194	C	T	0.397959	F0-657	edited_step	fix	intergenic_region	MODIFIER	ENSSSCG00000050391-U6	ENSSSCG00000050391-ENSSSCG00000020480	snv
	1	47203608	T	C	0.537037	F0-657	nuclear_transfor_step	fix	intergenic_region	MODIFIER	ENSSSCG00000050391-U6	ENSSSCG00000050391-ENSSSCG00000020480	snv
	1	47932420	T	A	0.542553	F0-657	edited_step	fix	intergenic_region	MODIFIER	U2-ENSSSCG00000050497	ENSSSCG00000043187-ENSSSCG00000050497	snv
	1	48188914	G	A	0.0166667	F0-657	isolation_step	fix	intergenic_region	MODIFIER	ENSSSCG00000050497-ENSSSCG00000047735	ENSSSCG00000050497-ENSSSCG00000047735	snv
	1	48412589	T	C	0.402174	F0-657	edited_step	fix	intergenic_region	MODIFIER	ENSSSCG00000050497-ENSSSCG00000047735	ENSSSCG00000050497-ENSSSCG00000047735	snv
	1	48442652	A	C	0.49	F0-657	edited_step	fix	intergenic_region	MODIFIER	ENSSSCG00000050497-ENSSSCG00000047735	ENSSSCG00000050497-ENSSSCG00000047735	snv
	1	48970624	G	C	0.434783	F0-657	edited_step	fix	intron_variant	MODIFIER	ADGRB3	ENSSSCG00000004270	snv
	1	48974070	C	T	0.555556	F0-657	edited_step	fix	intron_variant	MODIFIER	ADGRB3	ENSSSCG00000004270	snv
	1	49359122	A	C	0.00943396	F0-657	edited_step	fix	intron_variant	MODIFIER	ADGRB3	ENSSSCG00000004270	snv
	1	49440302	T	G	0.4	F0-657	nuclear_transfor_step	fix	intron_variant	MODIFIER	ADGRB3	ENSSSCG00000004270	snv
	1	49583827	T	C	0.574803	F0-657	nuclear_transfor_step	fix	intron_variant	MODIFIER	ADGRB3	ENSSSCG00000004270	snv
	1	50415682	T	C	0.46875	F0-657	nuclear_transfor_step	fix	intron_variant	MODIFIER	COL9A1	ENSSSCG00000004274	snv
	1	51584898	T	G	0.482143	F0-657	edited_step	fix	intergenic_region	MODIFIER	SNORA70-ENSSSCG00000046159	ENSSSCG00000020544-ENSSSCG00000046159	snv
	1	52244872	G	A	0.4875	F0-657	nuclear_transfor_step	fix	3_prime_UTR_variant	MODIFIER	RIMS1	ENSSSCG00000004280	snv
	1	59102552	T	C	0.510345	F0-657	nuclear_transfor_step	fix	intergenic_region	MODIFIER	ENSSSCG00000048181-U2	ENSSSCG00000048181-ENSSSCG00000042748	snv
	1	59373982	G	T	0.49505	F0-657	nuclear_transfor_step	fix	intergenic_region	MODIFIER	ENSSSCG00000048181-U2	ENSSSCG00000048181-ENSSSCG00000042748	snv
	1	59917029	T	C	0.522936	F0-657	nuclear_transfor_step	fix	intergenic_region	MODIFIER	ENSSSCG00000048181-U2	ENSSSCG00000048181-ENSSSCG00000042748	snv
	1	60582003	A	C	0.393162	F0-657	edited_step	fix	intergenic_region	MODIFIER	U2-EPHA7	ENSSSCG00000042748-ENSSSCG00000004336	snv
	1	61386790	C	A	0.539216	F0-657	edited_step	fix	intergenic_region	MODIFIER	ENSSSCG00000041435-ENSSSCG00000050706	ENSSSCG00000041435-ENSSSCG00000050706	snv
	1	61471245	T	G	0.385321	F0-657	edited_step	fix	intergenic_region	MODIFIER	ENSSSCG00000041435-ENSSSCG00000050706	ENSSSCG00000041435-ENSSSCG00000050706	snv
	1	62462023	A	G	0.436364	F0-657	edited_step	fix	intergenic_region	MODIFIER	ENSSSCG00000050706-ENSSSCG00000044734	ENSSSCG00000050706-ENSSSCG00000044734	snv
	1	65153502	A	G	0.00925926	F0-657	isolation_step	fix	intergenic_region	MODIFIER	U6-MIR2113	ENSSSCG00000034317-ENSSSCG00000019812	snv
	1	65368226	G	T	0.484848	F0-657	edited_step	fix	intergenic_region	MODIFIER	ENSSSCG00000044402-ENSSSCG00000047909	ENSSSCG00000044402-ENSSSCG00000047909	snv
	1	65471415	C	A	0.485075	F0-657	nuclear_transfor_step	fix	intergenic_region	MODIFIER	U6-ENSSSCG00000044799	ENSSSCG00000018969-ENSSSCG00000044799	snv
	1	65472864	A	T	0.472868	F0-657	nuclear_transfor_step	fix	intergenic_region	MODIFIER	U6-ENSSSCG00000044799	ENSSSCG00000018969-ENSSSCG00000044799	snv
	1	68367745	A	G	0.45045	F0-657	edited_step	fix	intron_variant	MODIFIER	GRIK2	ENSSSCG00000004361	snv
	1	68567060	G	T	0.474576	F0-657	edited_step	fix	intron_variant	MODIFIER	GRIK2	ENSSSCG00000004361	snv
	1	68655313	T	C	0.464	F0-657	nuclear_transfor_step	fix	intron_variant	MODIFIER	GRIK2	ENSSSCG00000004361	snv
	1	69441948	A	C	0.439655	F0-657	nuclear_transfor_step	fix	intergenic_region	MODIFIER	GRIK2-ENSSSCG00000046266	ENSSSCG00000004361-ENSSSCG00000046266	snv
	1	69853364	T	C	0.445783	F0-657	edited_step	fix	intergenic_region	MODIFIER	ENSSSCG00000046266-ENSSSCG00000047827	ENSSSCG00000046266-ENSSSCG00000047827	snv
	1	70586244	G	T	0.5	F0-657	nuclear_transfor_step	fix	intergenic_region	MODIFIER	ENSSSCG00000041890-HACE1	ENSSSCG00000041890-ENSSSCG00000004364	snv
	1	74109479	C	A	0.614286	F0-657	edited_step	fix	intron_variant	MODIFIER	ENSSSCG00000045749	ENSSSCG00000045749	snv
	1	80044950	T	C	0.00917431	F0-657	isolation_step	fix	intron_variant	MODIFIER	HS3ST5	ENSSSCG00000004433	snv
	1	80631427	C	A	0.410959	F0-657	edited_step	fix	intron_variant	MODIFIER	ENSSSCG00000044366	ENSSSCG00000044366	snv
	1	81303543	T	C	0.540541	F0-657	edited_step	fix	intergenic_region	MODIFIER	ENSSSCG00000050011-ENSSSCG00000042456	ENSSSCG00000050011-ENSSSCG00000042456	snv
	1	86901123	C	A	0.479675	F0-657	nuclear_transfor_step	fix	intergenic_region	MODIFIER	ENSSSCG00000050526-HMGN3	ENSSSCG00000050526-ENSSSCG00000004470	snv
	1	87439858	G	A	0.657895	F0-657	nuclear_transfor_step	fix	intergenic_region	MODIFIER	IRAK1BP1-ENSSSCG00000048044	ENSSSCG00000004472-ENSSSCG00000048044	snv
	1	89381617	G	T	0.44	F0-657	nuclear_transfor_step	fix	intergenic_region	MODIFIER	ENSSSCG00000046698-IMPG1	ENSSSCG00000046698-ENSSSCG00000004477	snv
	1	89745244	T	C	0.492308	F0-657	edited_step	fix	intergenic_region	MODIFIER	ENSSSCG00000046698-IMPG1	ENSSSCG00000046698-ENSSSCG00000004477	snv
	1	92790240	C	T	0.471074	F0-657	nuclear_transfor_step	fix	intergenic_region	MODIFIER	ENSSSCG00000049718-ENSSSCG00000033160	ENSSSCG00000049718-ENSSSCG00000033160	snv
	1	93209486	T	G	0.487179	F0-657	edited_step	fix	intergenic_region	MODIFIER	ENSSSCG00000051179-ENSSSCG00000008882	ENSSSCG00000051179-ENSSSCG00000008882	snv
	1	95119788	G	T	0.505376	F0-657	nuclear_transfor_step	fix	intergenic_region	MODIFIER	ENSSSCG00000051009-ENSSSCG00000004491	ENSSSCG00000051009-ENSSSCG00000004491	snv
	1	102295240	G	T	0.34375	F0-657	nuclear_transfor_step	fix	intron_variant	MODIFIER	DCC	ENSSSCG00000040836	snv
	1	105739820	C	A	0.583333	F0-657	edited_step	fix	intergenic_region	MODIFIER	ENSSSCG00000051116-TXNL1	ENSSSCG00000051116-ENSSSCG00000004537	snv
	1	106559050	C	G	0.512821	F0-657	edited_step	fix	intergenic_region	MODIFIER	ENSSSCG00000046392-ENSSSCG00000049680	ENSSSCG00000046392-ENSSSCG00000049680	snv
	1	107024545	C	A	0.536	F0-657	nuclear_transfor_step	fix	intron_variant	MODIFIER	SPG21	ENSSSCG00000004544	snv
	1	112719974	T	C	0.277778	F0-657	edited_step	fix	intron_variant	MODIFIER	MYO1E	ENSSSCG00000004587	snv
	1	112822952	G	A	0.469697	F0-657	edited_step	fix	intron_variant	MODIFIER	MYO1E	ENSSSCG00000004587	snv
	1	113944524	G	A	0.425743	F0-657	edited_step	fix	intron_variant	MODIFIER	ALDH1A2	ENSSSCG00000025578	snv
	1	116758173	C	A	0.494949	F0-657	edited_step	fix	intron_variant	MODIFIER	ENSSSCG00000049821	ENSSSCG00000049821	snv
	1	117680324	G	A	0.0113636	F0-657	edited_step	fix	intron_variant	MODIFIER	UNC13C	ENSSSCG00000004614	snv
	1	124196580	A	G	0.408696	F0-657	nuclear_transfor_step	fix	downstream_gene_variant	MODIFIER	ENSSSCG00000049742	ENSSSCG00000049742	snv
	1	124310137	A	G	0.00847458	F0-657	isolation_step	fix	upstream_gene_variant	MODIFIER	SEMA6D	ENSSSCG00000004663	snv
	1	125943770	G	A	0.466667	F0-657	nuclear_transfor_step	fix	intergenic_region	MODIFIER	ENSSSCG00000044345-ENSSSCG00000004666	ENSSSCG00000044345-ENSSSCG00000004666	snv
	1	130581877	C	T	0.430233	F0-657	edited_step	fix	downstream_gene_variant	MODIFIER	RAD51	ENSSSCG00000004766	snv
	1	134133792	C	A	0.0344828	F0-657	edited_step	fix	intron_variant	MODIFIER	MEIS2	ENSSSCG00000004795	snv
	1	134367352	G	A	0.534483	F0-657	nuclear_transfor_step	fix	intron_variant	MODIFIER	C15orf41	ENSSSCG00000026900	snv
	1	135635471	C	A	0.455357	F0-657	nuclear_transfor_step	fix	intron_variant	MODIFIER	DPH6	ENSSSCG00000035254	snv
	1	136872029	C	A	0.540816	F0-657	edited_step	fix	intron_variant	MODIFIER	FMN1	ENSSSCG00000044690	snv
	1	141370571	C	A	0.357143	F0-657	edited_step	fix	intergenic_region	MODIFIER	ENSSSCG00000032719-ENSSSCG00000043519	ENSSSCG00000032719-ENSSSCG00000043519	snv
	1	143229761	A	G	0.544444	F0-657	edited_step	fix	intron_variant	MODIFIER	OTUD7A	ENSSSCG00000004840	snv
	1	144170545	T	C	0.5625	F0-657	nuclear_transfor_step	fix	intron_variant	MODIFIER	APBA2	ENSSSCG00000004849	snv
	1	144283707	C	G	0.471154	F0-657	nuclear_transfor_step	fix	intron_variant	MODIFIER	APBA2	ENSSSCG00000004849	snv
	1	144683580	A	C	0.00892857	F0-657	edited_step	fix	intron_variant	MODIFIER	FAM189A1	ENSSSCG00000004850	snv
	1	145922159	T	C	0.446602	F0-657	edited_step	fix	downstream_gene_variant	MODIFIER	NFATC1	ENSSSCG00000004856	snv
	1	145925562	A	C	0.271845	F0-657	edited_step	fix	3_prime_UTR_variant	MODIFIER	NFATC1	ENSSSCG00000004856	snv
	1	147335016	C	A	0.53125	F0-657	edited_step	fix	intergenic_region	MODIFIER	ENSSSCG00000044951-GALR1	ENSSSCG00000044951-ENSSSCG00000036984	snv
	1	148131025	G	T	0.398058	F0-657	nuclear_transfor_step	fix	intergenic_region	MODIFIER	ZNF516-ENSSSCG00000045964	ENSSSCG00000004859-ENSSSCG00000045964	snv
	1	148360280	G	T	0.5	F0-657	nuclear_transfor_step	fix	intergenic_region	MODIFIER	ENSSSCG00000043269-ENSSSCG00000043898	ENSSSCG00000043269-ENSSSCG00000043898	snv
	1	150955135	G	T	0.427481	F0-657	nuclear_transfor_step	fix	intergenic_region	MODIFIER	U6-CBLN2	ENSSSCG00000031071-ENSSSCG00000020859	snv
	1	153863101	G	C	0.508475	F0-657	nuclear_transfor_step	fix	intron_variant	MODIFIER	ENSSSCG00000032084	ENSSSCG00000032084	snv
	1	155099289	A	T	0.495413	F0-657	nuclear_transfor_step	fix	intergenic_region	MODIFIER	DSEL-U6	ENSSSCG00000035941-ENSSSCG00000019193	snv
	1	156463649	T	C	0.490566	F0-657	edited_step	fix	intergenic_region	MODIFIER	CDH7-ENSSSCG00000049207	ENSSSCG00000004886-ENSSSCG00000049207	snv
	1	156755337	C	A	0.464646	F0-657	edited_step	fix	intergenic_region	MODIFIER	ENSSSCG00000045840-ENSSSCG00000041887	ENSSSCG00000045840-ENSSSCG00000041887	snv
	1	156981216	G	T	0.470588	F0-657	edited_step	fix	intergenic_region	MODIFIER	ENSSSCG00000045840-ENSSSCG00000041887	ENSSSCG00000045840-ENSSSCG00000041887	snv
	1	157470759	C	T	0.509615	F0-657	nuclear_transfor_step	fix	intergenic_region	MODIFIER	ENSSSCG00000041887-ENSSSCG00000047724	ENSSSCG00000041887-ENSSSCG00000047724	snv
	1	158112414	G	T	0.517241	F0-657	nuclear_transfor_step	fix	intron_variant	MODIFIER	SERPINB13	ENSSSCG00000034519	snv
	1	160584131	C	A	0.306452	F0-657	edited_step	fix	intergenic_region	MODIFIER	ENSSSCG00000045579-ENSSSCG00000036234	ENSSSCG00000045579-ENSSSCG00000036234	snv
	1	162175707	A	G	0.00729927	F0-657	isolation_step	fix	5_prime_UTR_variant	MODIFIER	ALPK2	ENSSSCG00000004918	snv
	1	162210526	G	T	0.474138	F0-657	nuclear_transfor_step	fix	intron_variant	MODIFIER	ALPK2	ENSSSCG00000004918	snv
	1	162858228	G	T	0.559441	F0-657	nuclear_transfor_step	fix	intergenic_region	MODIFIER	NEDD4L-ATP8B1	ENSSSCG00000004919-ENSSSCG00000004921	snv
	1	166561542	C	A	0.496296	F0-657	nuclear_transfor_step	fix	intron_variant	MODIFIER	CORO2B	ENSSSCG00000004962	snv
	1	167723714	G	T	0.545455	F0-657	nuclear_transfor_step	fix	intron_variant	MODIFIER	ENSSSCG00000037389	ENSSSCG00000037389	snv
	1	170717763	A	G	0.552381	F0-657	edited_step	fix	intergenic_region	MODIFIER	ENSSSCG00000044807-ENSSSCG00000044677	ENSSSCG00000044807-ENSSSCG00000044677	snv
	1	170717878	A	G	0.505882	F0-657	edited_step	fix	intergenic_region	MODIFIER	ENSSSCG00000044807-ENSSSCG00000044677	ENSSSCG00000044807-ENSSSCG00000044677	snv
	1	170958761	A	T	0.559524	F0-657	edited_step	fix	intergenic_region	MODIFIER	ENSSSCG00000044807-ENSSSCG00000044677	ENSSSCG00000044807-ENSSSCG00000044677	snv
	1	172254001	A	C	0.410959	F0-657	edited_step	fix	intergenic_region	MODIFIER	LRFN5-ENSSSCG00000041306	ENSSSCG00000004990-ENSSSCG00000041306	snv
	1	174422081	T	C	0.543307	F0-657	nuclear_transfor_step	fix	intergenic_region	MODIFIER	ENSSSCG00000047027-ENSSSCG00000043072	ENSSSCG00000047027-ENSSSCG00000043072	snv
	1	174828583	T	C	0.461538	F0-657	nuclear_transfor_step	fix	intergenic_region	MODIFIER	ENSSSCG00000043072-C14orf28	ENSSSCG00000043072-ENSSSCG00000030679	snv
	1	176342893	G	T	0.37963	F0-657	edited_step	fix	intergenic_region	MODIFIER	ENSSSCG00000043544-RPL10L	ENSSSCG00000043544-ENSSSCG00000005001	snv
	1	176924191	G	C	0.0347826	F0-657	edited_step	fix	intron_variant	MODIFIER	MDGA2	ENSSSCG00000005002	snv
	1	177704940	C	A	0.0169492	F0-657	edited_step	fix	intergenic_region	MODIFIER	MDGA2-ENSSSCG00000044998	ENSSSCG00000005002-ENSSSCG00000044998	snv
	1	179183991	A	C	0.48913	F0-657	edited_step	fix	intergenic_region	MODIFIER	U6-ENSSSCG00000046948	ENSSSCG00000033970-ENSSSCG00000046948	snv
	1	180543164	C	G	0.479592	F0-657	nuclear_transfor_step	fix	upstream_gene_variant	MODIFIER	NIN	ENSSSCG00000005022	snv
	1	184190141	G	C	0.547368	F0-657	edited_step	fix	upstream_gene_variant	MODIFIER	ENSSSCG00000042101	ENSSSCG00000042101	snv
	1	186915747	A	C	0.495652	F0-657	edited_step	fix	intron_variant	MODIFIER	SLC35F4	ENSSSCG00000005068	snv
	1	186984816	T	C	0.513514	F0-657	edited_step	fix	intergenic_region	MODIFIER	SLC35F4-ARMH4	ENSSSCG00000005068-ENSSSCG00000005071	snv
	1	190752732	T	G	0.00847458	F0-657	isolation_step	fix	intergenic_region	MODIFIER	SNAPC1-SYT16	ENSSSCG00000005097-ENSSSCG00000005098	snv
	1	191366904	A	G	0.513274	F0-657	edited_step	fix	intergenic_region	MODIFIER	MRPL46-ENSSSCG00000048650	ENSSSCG00000005105-ENSSSCG00000048650	snv
	1	192672414	A	C	0.00909091	F0-657	edited_step	fix	intergenic_region	MODIFIER	ENSSSCG00000041527-ENSSSCG00000043508	ENSSSCG00000041527-ENSSSCG00000043508	snv
	1	193002116	G	T	0.32	F0-657	edited_step	fix	intron_variant	MODIFIER	ENSSSCG00000036551	ENSSSCG00000036551	snv
	1	197021904	G	T	0.486842	F0-657	edited_step	fix	intergenic_region	MODIFIER	U6-TUSC1	ENSSSCG00000037763-ENSSSCG00000005128	snv
	1	197024104	A	C	0.44	F0-657	nuclear_transfor_step	fix	intergenic_region	MODIFIER	U6-TUSC1	ENSSSCG00000037763-ENSSSCG00000005128	snv
	1	197249358	G	T	0.428571	F0-657	edited_step	fix	intergenic_region	MODIFIER	U6-TUSC1	ENSSSCG00000037763-ENSSSCG00000005128	snv
	1	197553180	A	C	0.558621	F0-657	nuclear_transfor_step	fix	intergenic_region	MODIFIER	TUSC1-IZUMO3	ENSSSCG00000005128-ENSSSCG00000005129	snv
	1	198128887	G	T	0.572727	F0-657	nuclear_transfor_step	fix	intergenic_region	MODIFIER	TUSC1-IZUMO3	ENSSSCG00000005128-ENSSSCG00000005129	snv
	1	198666240	A	T	0.540541	F0-657	edited_step	fix	intergenic_region	MODIFIER	U6-U6	ENSSSCG00000038736-ENSSSCG00000033275	snv
	1	199067359	T	C	0.522124	F0-657	edited_step	fix	intron_variant	MODIFIER	ELAVL2	ENSSSCG00000005130	snv
	1	200495945	T	A	0.0571429	F0-657	edited_step	fix	intergenic_region	MODIFIER	DMRTA1-ENSSSCG00000050165	ENSSSCG00000005131-ENSSSCG00000050165	snv
	1	207762924	G	T	0.466667	F0-657	edited_step	fix	intron_variant	MODIFIER	FREM1	ENSSSCG00000039025	snv
	1	210319103	C	A	0.507692	F0-657	edited_step	fix	intron_variant	MODIFIER	ENSSSCG00000048974	ENSSSCG00000048974	snv
	1	210661088	A	C	0.426087	F0-657	edited_step	fix	intergenic_region	MODIFIER	ENSSSCG00000048974-ENSSSCG00000047464	ENSSSCG00000048974-ENSSSCG00000047464	snv
	1	211254818	C	A	0.41	F0-657	edited_step	fix	intergenic_region	MODIFIER	U6-ENSSSCG00000050028	ENSSSCG00000050395-ENSSSCG00000050028	snv
	1	211720159	T	C	0.546392	F0-657	nuclear_transfor_step	fix	intergenic_region	MODIFIER	ENSSSCG00000050028-ENSSSCG00000045516	ENSSSCG00000050028-ENSSSCG00000045516	snv
	1	212790470	T	C	0.0147059	F0-657	isolation_step	fix	intergenic_region	MODIFIER	ENSSSCG00000048126-ENSSSCG00000043945	ENSSSCG00000048126-ENSSSCG00000043945	snv
	1	212790501	A	T	0.518182	F0-657	edited_step	fix	intergenic_region	MODIFIER	ENSSSCG00000048126-ENSSSCG00000043945	ENSSSCG00000048126-ENSSSCG00000043945	snv
	1	213137253	A	G	0.472527	F0-657	edited_step	fix	intron_variant	MODIFIER	ENSSSCG00000042224	ENSSSCG00000042224	snv
	1	214311539	C	G	0.0246914	F0-657	edited_step	fix	intergenic_region	MODIFIER	ENSSSCG00000045828-U6	ENSSSCG00000045828-ENSSSCG00000035782	snv
	1	218360304	G	C	0.56	F0-657	nuclear_transfor_step	fix	upstream_gene_variant	MODIFIER	RFX3	ENSSSCG00000005225	snv
	1	218476273	G	T	0.435185	F0-657	edited_step	fix	5_prime_UTR_premature_start_codon_gain_variant	LOW	RFX3	ENSSSCG00000005225	snv
	1	219397353	G	T	0.466667	F0-657	nuclear_transfor_step	fix	intergenic_region	MODIFIER	VLDLR-SMARCA2	ENSSSCG00000005229-ENSSSCG00000005232	snv
	1	221469749	G	T	0.52381	F0-657	edited_step	fix	intron_variant	MODIFIER	DOCK8	ENSSSCG00000005240	snv
	1	223374778	C	G	0.403226	F0-657	nuclear_transfor_step	fix	intergenic_region	MODIFIER	ENSSSCG00000041641-MAMDC2	ENSSSCG00000041641-ENSSSCG00000030655	snv
	1	224483608	G	T	0.0367647	F0-657	edited_step	fix	intron_variant	MODIFIER	TRPM3	ENSSSCG00000005257	snv
	1	225948820	A	G	0.317757	F0-657	edited_step	fix	intron_variant	MODIFIER	TMC1	ENSSSCG00000005266	snv
	1	226845347	G	A	0.107527	F0-657	edited_step	fix	intergenic_region	MODIFIER	ANXA1-RORB	ENSSSCG00000005267-ENSSSCG00000005268	snv
	1	228938456	G	T	0.00900901	F0-657	edited_step	fix	intron_variant	MODIFIER	PCSK5	ENSSSCG00000023520	snv
	1	235165805	T	C	0.484211	F0-657	edited_step	fix	intergenic_region	MODIFIER	ENSSSCG00000047649-ENSSSCG00000049366	ENSSSCG00000047649-ENSSSCG00000049366	snv
	1	235364068	C	A	0.5	F0-657	edited_step	fix	intron_variant	MODIFIER	ENSSSCG00000049366	ENSSSCG00000049366	snv
	1	237438112	C	T	0.53211	F0-657	edited_step	fix	3_prime_UTR_variant	MODIFIER	MELK	ENSSSCG00000005344	snv
	1	237606850	G	T	0.44086	F0-657	edited_step	fix	intron_variant	MODIFIER	PAX5	ENSSSCG00000036086	snv
	1	241088545	T	A	0.525253	F0-657	nuclear_transfor_step	fix	intron_variant	MODIFIER	ENSSSCG00000041432	ENSSSCG00000041432	snv
	1	243745725	T	C	0.560748	F0-657	nuclear_transfor_step	fix	intergenic_region	MODIFIER	ENSSSCG00000044263-ENSSSCG00000005401	ENSSSCG00000044263-ENSSSCG00000005401	snv
	1	243909432	C	T	0.461538	F0-657	edited_step	fix	intergenic_region	MODIFIER	ENSSSCG00000044263-ENSSSCG00000005401	ENSSSCG00000044263-ENSSSCG00000005401	snv
	1	244489469	G	T	0.526316	F0-657	edited_step	fix	intergenic_region	MODIFIER	ENSSSCG00000005401-ENSSSCG00000051755	ENSSSCG00000005401-ENSSSCG00000051755	snv
	1	245723347	T	G	0.368421	F0-657	edited_step	fix	intergenic_region	MODIFIER	ENSSSCG00000045877-ENSSSCG00000044671	ENSSSCG00000045877-ENSSSCG00000044671	snv
	1	246408568	T	G	0.00645161	F0-657	isolation_step	fix	intergenic_region	MODIFIER	ENSSSCG00000045023-SLC44A1	ENSSSCG00000045023-ENSSSCG00000005425	snv
	1	258106552	G	A	0.494624	F0-657	edited_step	fix	intergenic_region	MODIFIER	TLR4-U6	ENSSSCG00000005503-ENSSSCG00000040848	snv
	1	258358582	A	G	0.469565	F0-657	nuclear_transfor_step	fix	intergenic_region	MODIFIER	TLR4-U6	ENSSSCG00000005503-ENSSSCG00000040848	snv
	1	258837874	G	A	0.00943396	F0-657	edited_step	fix	intergenic_region	MODIFIER	ENSSSCG00000050756-ENSSSCG00000043986	ENSSSCG00000050756-ENSSSCG00000043986	snv
	1	262554738	G	T	0.450704	F0-657	edited_step	fix	intergenic_region	MODIFIER	ENSSSCG00000042662-ENSSSCG00000032127	ENSSSCG00000042662-ENSSSCG00000032127	snv
	1	263034680	C	A	0.546218	F0-657	edited_step	fix	intergenic_region	MODIFIER	ENSSSCG00000046183-ENSSSCG00000051496	ENSSSCG00000046183-ENSSSCG00000051496	snv
	1	264417527	C	A	0.010101	F0-657	isolation_step	fix	intron_variant	MODIFIER	DENND1A	ENSSSCG00000005585	snv
	1	266540612	A	T	0.075188	F0-657	edited_step	fix	intron_variant	MODIFIER	PBX3	ENSSSCG00000005604	snv
	1	269150180	C	T	0.459459	F0-657	edited_step	fix	3_prime_UTR_variant	MODIFIER	TBC1D13	ENSSSCG00000005660	snv
	1	269306842	G	A	0.5	F0-657	nuclear_transfor_step	fix	missense_variant	MODERATE	NUP188	ENSSSCG00000005667	snv
	1	272381618	G	T	0.516129	F0-657	nuclear_transfor_step	fix	downstream_gene_variant	MODIFIER	BARHL1	ENSSSCG00000005730	snv
	1	272851813	T	A	0.52381	F0-657	nuclear_transfor_step	fix	intron_variant	MODIFIER	RPL7A	ENSSSCG00000035904	snv
	2	3122082	T	G	0.511111	F0-657	nuclear_transfor_step	fix	missense_variant	MODERATE	PPFIA1	ENSSSCG00000037451	snv
	2	10773477	T	C	0.461538	F0-657	edited_step	fix	intron_variant	MODIFIER	CD6	ENSSSCG00000013111	snv
	2	12699517	G	C	0.555556	F0-657	edited_step	fix	downstream_gene_variant	MODIFIER	ENSSSCG00000031496	ENSSSCG00000031496	snv
	2	19066769	C	G	0.576271	F0-657	edited_step	fix	intergenic_region	MODIFIER	API5-ENSSSCG00000043369	ENSSSCG00000013285-ENSSSCG00000043369	snv
	2	19840527	C	A	0.287356	F0-657	edited_step	fix	intergenic_region	MODIFIER	ENSSSCG00000049087-ENSSSCG00000047796	ENSSSCG00000049087-ENSSSCG00000047796	snv
	2	19976280	A	G	0.0227273	F0-657	edited_step	fix	intergenic_region	MODIFIER	ENSSSCG00000049087-ENSSSCG00000047796	ENSSSCG00000049087-ENSSSCG00000047796	snv
	2	20359593	A	G	0.564516	F0-657	nuclear_transfor_step	fix	intergenic_region	MODIFIER	ENSSSCG00000047796-ENSSSCG00000047142	ENSSSCG00000047796-ENSSSCG00000047142	snv
	2	20534109	A	G	0.445378	F0-657	edited_step	fix	intergenic_region	MODIFIER	ENSSSCG00000047142-ENSSSCG00000045282	ENSSSCG00000047142-ENSSSCG00000045282	snv
	2	21819138	A	C	0.58209	F0-657	edited_step	fix	intergenic_region	MODIFIER	LRRC4C-ENSSSCG00000049735	ENSSSCG00000013286-ENSSSCG00000049735	snv
	2	23883325	T	A	0.541353	F0-657	nuclear_transfor_step	fix	intergenic_region	MODIFIER	ENSSSCG00000050877-ENSSSCG00000045070	ENSSSCG00000050877-ENSSSCG00000045070	snv
	2	24043648	A	C	0.487805	F0-657	edited_step	fix	intergenic_region	MODIFIER	ENSSSCG00000045070-ENSSSCG00000048261	ENSSSCG00000045070-ENSSSCG00000048261	snv
	2	26329810	G	T	0.47541	F0-657	nuclear_transfor_step	fix	intron_variant	MODIFIER	EHF	ENSSSCG00000013300	snv
	2	26920321	A	G	0.489051	F0-657	nuclear_transfor_step	fix	intergenic_region	MODIFIER	CAPRIN1-ENSSSCG00000041545	ENSSSCG00000013305-ENSSSCG00000041545	snv
	2	30686065	A	G	0.374046	F0-657	edited_step	fix	intergenic_region	MODIFIER	KCNA4-ENSSSCG00000041694	ENSSSCG00000013330-ENSSSCG00000041694	snv
	2	30877681	C	A	0.28125	F0-657	edited_step	fix	intergenic_region	MODIFIER	KCNA4-ENSSSCG00000041694	ENSSSCG00000013330-ENSSSCG00000041694	snv
	2	32428192	C	A	0.54717	F0-657	edited_step	fix	intergenic_region	MODIFIER	KIF18A-BDNF	ENSSSCG00000013332-ENSSSCG00000013333	snv
	2	33298419	G	T	0.454545	F0-657	nuclear_transfor_step	fix	upstream_gene_variant	MODIFIER	BBOX1	ENSSSCG00000013337	snv
	2	33780484	G	T	0.0175439	F0-657	edited_step	fix	intron_variant	MODIFIER	ANO3	ENSSSCG00000013339	snv
	2	34937345	T	G	0.542857	F0-657	nuclear_transfor_step	fix	intron_variant	MODIFIER	LUZP2	ENSSSCG00000013341	snv
	2	34955724	C	A	0.42	F0-657	edited_step	fix	intron_variant	MODIFIER	LUZP2	ENSSSCG00000013341	snv
	2	35313940	T	A	0.516854	F0-657	edited_step	fix	intron_variant	MODIFIER	LUZP2	ENSSSCG00000013341	snv
	2	36284853	A	T	0.581197	F0-657	edited_step	fix	intergenic_region	MODIFIER	ENSSSCG00000049346-ENSSSCG00000048778	ENSSSCG00000049346-ENSSSCG00000048778	snv
	2	36372191	A	C	0.349593	F0-657	edited_step	fix	intergenic_region	MODIFIER	ENSSSCG00000048778-ENSSSCG00000047428	ENSSSCG00000048778-ENSSSCG00000047428	snv
	2	37056901	A	T	0.5	F0-657	edited_step	fix	intergenic_region	MODIFIER	ENSSSCG00000045492-SLC17A6	ENSSSCG00000045492-ENSSSCG00000013343	snv
	2	37251667	C	T	0.557522	F0-657	nuclear_transfor_step	fix	intron_variant	MODIFIER	ANO5	ENSSSCG00000013344	snv
	2	38025525	A	G	0.55	F0-657	nuclear_transfor_step	fix	intron_variant	MODIFIER	NELL1	ENSSSCG00000039940	snv
	2	40353176	C	A	0.364865	F0-657	edited_step	fix	intergenic_region	MODIFIER	ZDHHC13-ENSSSCG00000037504	ENSSSCG00000021688-ENSSSCG00000037504	snv
	2	41294734	G	T	0.516854	F0-657	edited_step	fix	intron_variant	MODIFIER	SERGEF	ENSSSCG00000042767	snv
	2	43774577	C	A	0.511111	F0-657	edited_step	fix	intergenic_region	MODIFIER	ENSSSCG00000043915-INSC	ENSSSCG00000043915-ENSSSCG00000013385	snv
	2	44003979	A	C	0.486486	F0-657	edited_step	fix	intron_variant	MODIFIER	INSC	ENSSSCG00000013385	snv
	2	45977776	T	G	0.512605	F0-657	nuclear_transfor_step	fix	intron_variant	MODIFIER	ARNTL	ENSSSCG00000013397	snv
	2	47175340	G	A	0.485294	F0-657	edited_step	fix	intron_variant	MODIFIER	ENSSSCG00000031706	ENSSSCG00000031706	snv
	2	48253361	C	A	0.0550459	F0-657	edited_step	fix	intergenic_region	MODIFIER	GALNT18-ENSSSCG00000048857	ENSSSCG00000013403-ENSSSCG00000048857	snv
	2	48488391	T	C	0.642857	F0-657	nuclear_transfor_step	fix	intergenic_region	MODIFIER	ENSSSCG00000048857-ZBED5	ENSSSCG00000048857-ENSSSCG00000033411	snv
	2	52989106	C	A	0.0560748	F0-657	edited_step	fix	upstream_gene_variant	MODIFIER	ENSSSCG00000050698	ENSSSCG00000050698	snv
	2	53223486	A	G	0.538462	F0-657	edited_step	fix	intergenic_region	MODIFIER	OR2T6-ENSSSCG00000047055	ENSSSCG00000044276-ENSSSCG00000047055	snv
	2	53239247	G	T	0.0535714	F0-657	edited_step	fix	upstream_gene_variant	MODIFIER	ENSSSCG00000047055	ENSSSCG00000047055	snv
	2	54772558	A	G	0.508197	F0-657	nuclear_transfor_step	fix	intergenic_region	MODIFIER	ENSSSCG00000049159-ENSSSCG00000041194	ENSSSCG00000049159-ENSSSCG00000041194	snv
	2	54796777	G	C	0.522388	F0-657	edited_step	fix	intergenic_region	MODIFIER	ENSSSCG00000041194-OR2M4	ENSSSCG00000041194-ENSSSCG00000049328	snv
	2	54821296	C	A	0.449541	F0-657	nuclear_transfor_step	fix	intergenic_region	MODIFIER	ENSSSCG00000041194-OR2M4	ENSSSCG00000041194-ENSSSCG00000049328	snv
	2	55106702	C	A	0.609524	F0-657	edited_step	fix	intergenic_region	MODIFIER	ENSSSCG00000036329-ENSSSCG00000049416	ENSSSCG00000036329-ENSSSCG00000049416	snv
	2	55180609	T	A	0.555556	F0-657	nuclear_transfor_step	fix	intergenic_region	MODIFIER	ENSSSCG00000037896-ENSSSCG00000036934	ENSSSCG00000037896-ENSSSCG00000036934	snv
	2	55698106	C	G	0.550562	F0-657	edited_step	fix	intergenic_region	MODIFIER	ENSSSCG00000029755-ENSSSCG00000027225	ENSSSCG00000029755-ENSSSCG00000027225	snv
	2	55927781	A	G	0.431034	F0-657	nuclear_transfor_step	fix	downstream_gene_variant	MODIFIER	ENSSSCG00000032515	ENSSSCG00000032515	snv
	2	56986172	A	T	0.5	F0-657	edited_step	fix	upstream_gene_variant	MODIFIER	ENSSSCG00000049755	ENSSSCG00000049755	snv
	2	57481321	A	G	0.551724	F0-657	edited_step	fix	upstream_gene_variant	MODIFIER	ENSSSCG00000050084	ENSSSCG00000050084	snv
	2	58025212	A	C	0.333333	F0-657	edited_step	fix	intron_variant	MODIFIER	ENSSSCG00000045468	ENSSSCG00000045468	snv
	2	62602449	T	A	0.534247	F0-657	edited_step	fix	upstream_gene_variant	MODIFIER	ENSSSCG00000048292	ENSSSCG00000048292	snv
	2	63044659	C	G	0.417391	F0-657	nuclear_transfor_step	fix	intergenic_region	MODIFIER	ENSSSCG00000046196-ENSSSCG00000050071	ENSSSCG00000046196-ENSSSCG00000050071	snv
	2	63689613	G	C	0.0512821	F0-657	edited_step	fix	intergenic_region	MODIFIER	ENSSSCG00000035905-ENSSSCG00000013788	ENSSSCG00000035905-ENSSSCG00000013788	snv
	2	63689983	A	G	0.481013	F0-657	edited_step	fix	intergenic_region	MODIFIER	ENSSSCG00000035905-ENSSSCG00000013788	ENSSSCG00000035905-ENSSSCG00000013788	snv
	2	66581993	G	T	0.582609	F0-657	nuclear_transfor_step	fix	intron_variant	MODIFIER	ENSSSCG00000021757	ENSSSCG00000021757	snv
	2	67290642	G	C	0.487603	F0-657	edited_step	fix	intergenic_region	MODIFIER	ENSSSCG00000041155-ZNF317	ENSSSCG00000041155-ENSSSCG00000032506	snv
	2	68352743	C	A	0.347222	F0-657	edited_step	fix	intergenic_region	MODIFIER	ENSSSCG00000047360-ENSSSCG00000031931	ENSSSCG00000047360-ENSSSCG00000031931	snv
	2	70906671	C	A	0.07	F0-657	edited_step	fix	intron_variant	MODIFIER	ANGPTL4	ENSSSCG00000013599	snv
	2	71116442	G	T	0.56044	F0-657	edited_step	fix	missense_variant	MODERATE	FBN3	ENSSSCG00000013594	snv
	2	75461906	C	T	0.641509	F0-657	nuclear_transfor_step	fix	upstream_gene_variant	MODIFIER	GNA11	ENSSSCG00000029279	snv
	2	81904501	A	C	0.514706	F0-657	edited_step	fix	downstream_gene_variant	MODIFIER	HRH2	ENSSSCG00000029096	snv
	2	84394589	T	C	0.0215054	F0-657	edited_step	fix	synonymous_variant	LOW	HMGCR	ENSSSCG00000014080	snv
	2	84856078	C	G	0.408	F0-657	nuclear_transfor_step	fix	intergenic_region	MODIFIER	POC5-SV2C	ENSSSCG00000014084-ENSSSCG00000034062	snv
	2	86321421	C	A	0.444444	F0-657	nuclear_transfor_step	fix	missense_variant	MODERATE	ENSSSCG00000014097	ENSSSCG00000014097	snv
	2	89991195	C	G	0.0078125	F0-657	isolation_step	fix	intron_variant	MODIFIER	SSBP2	ENSSSCG00000035757	snv
	2	92114844	A	G	0.454545	F0-657	nuclear_transfor_step	fix	intergenic_region	MODIFIER	HAPLN1-EDIL3	ENSSSCG00000014137-ENSSSCG00000026780	snv
	2	92158522	T	C	0.490566	F0-657	nuclear_transfor_step	fix	intron_variant	MODIFIER	EDIL3	ENSSSCG00000026780	snv
	2	92761860	G	T	0.477273	F0-657	nuclear_transfor_step	fix	intergenic_region	MODIFIER	EDIL3-COX7C	ENSSSCG00000026780-ENSSSCG00000040325	snv
	2	93359455	A	C	0.425	F0-657	edited_step	fix	intergenic_region	MODIFIER	EDIL3-COX7C	ENSSSCG00000026780-ENSSSCG00000040325	snv
	2	94680537	C	A	0.0555556	F0-657	edited_step	fix	intergenic_region	MODIFIER	ENSSSCG00000046920-RASA1	ENSSSCG00000046920-ENSSSCG00000014146	snv
	2	95681883	G	C	0.49	F0-657	nuclear_transfor_step	fix	intron_variant	MODIFIER	TMEM161B	ENSSSCG00000014148	snv
	2	95736477	A	C	0.504854	F0-657	nuclear_transfor_step	fix	intergenic_region	MODIFIER	ENSSSCG00000050141-ENSSSCG00000038476	ENSSSCG00000050141-ENSSSCG00000038476	snv
	2	97054764	A	G	0.494737	F0-657	edited_step	fix	intergenic_region	MODIFIER	ENSSSCG00000045004-ENSSSCG00000049927	ENSSSCG00000045004-ENSSSCG00000049927	snv
	2	98711276	C	G	0.0133333	F0-657	edited_step	fix	intergenic_region	MODIFIER	ARRDC3-U1	ENSSSCG00000014156-ENSSSCG00000020474	snv
	2	100848389	A	G	0.44	F0-657	nuclear_transfor_step	fix	intron_variant	MODIFIER	FAM172A	ENSSSCG00000027608	snv
	2	100871899	T	A	0.518987	F0-657	nuclear_transfor_step	fix	intron_variant	MODIFIER	FAM172A	ENSSSCG00000027608	snv
	2	100887517	C	A	0.454545	F0-657	edited_step	fix	intron_variant	MODIFIER	FAM172A	ENSSSCG00000027608	snv
	2	103159751	A	C	0.00980392	F0-657	edited_step	fix	intergenic_region	MODIFIER	PCSK1-CAST	ENSSSCG00000014169-ENSSSCG00000014170	snv
	2	104139086	G	A	0.592	F0-657	nuclear_transfor_step	fix	intergenic_region	MODIFIER	ENSSSCG00000049220-ENSSSCG00000051144	ENSSSCG00000049220-ENSSSCG00000051144	snv
	2	106020380	C	G	0.511111	F0-657	edited_step	fix	intergenic_region	MODIFIER	ENSSSCG00000042097-ENSSSCG00000049190	ENSSSCG00000042097-ENSSSCG00000049190	snv
	2	107401689	A	G	0.434783	F0-657	edited_step	fix	intergenic_region	MODIFIER	ENSSSCG00000046316-ENSSSCG00000033364	ENSSSCG00000046316-ENSSSCG00000033364	snv
	2	108727662	A	C	0.495327	F0-657	edited_step	fix	intergenic_region	MODIFIER	ENSSSCG00000042485-C5orf30	ENSSSCG00000042485-ENSSSCG00000038779	snv
	2	109019699	G	C	0.479675	F0-657	nuclear_transfor_step	fix	intergenic_region	MODIFIER	ENSSSCG00000014186-NUDT12	ENSSSCG00000014186-ENSSSCG00000014187	snv
	2	110190593	G	A	0.643678	F0-657	edited_step	fix	intergenic_region	MODIFIER	ENSSSCG00000043979-U6	ENSSSCG00000043979-ENSSSCG00000023111	snv
	2	110241200	T	A	0.504202	F0-657	edited_step	fix	intergenic_region	MODIFIER	ENSSSCG00000043979-U6	ENSSSCG00000043979-ENSSSCG00000023111	snv
	2	110915187	C	T	0.45098	F0-657	edited_step	fix	intergenic_region	MODIFIER	ENSSSCG00000049953-ENSSSCG00000051043	ENSSSCG00000049953-ENSSSCG00000051043	snv
	2	112038780	T	G	0.538462	F0-657	edited_step	fix	intergenic_region	MODIFIER	ENSSSCG00000043847-ENSSSCG00000044646	ENSSSCG00000043847-ENSSSCG00000044646	snv
	2	112075221	C	A	0.418182	F0-657	nuclear_transfor_step	fix	intergenic_region	MODIFIER	ENSSSCG00000043847-ENSSSCG00000044646	ENSSSCG00000043847-ENSSSCG00000044646	snv
	2	112270572	T	G	0.513761	F0-657	edited_step	fix	intergenic_region	MODIFIER	ENSSSCG00000043847-ENSSSCG00000044646	ENSSSCG00000043847-ENSSSCG00000044646	snv
	2	112624936	T	G	0.504425	F0-657	nuclear_transfor_step	fix	intron_variant	MODIFIER	EFNA5	ENSSSCG00000036520	snv
	2	112709953	T	C	0.522936	F0-657	edited_step	fix	intron_variant	MODIFIER	EFNA5	ENSSSCG00000036520	snv
	2	113869138	T	A	0.555556	F0-657	edited_step	fix	intron_variant	MODIFIER	FER	ENSSSCG00000027074	snv
	2	116453723	A	T	0.455224	F0-657	nuclear_transfor_step	fix	intron_variant	MODIFIER	MCC	ENSSSCG00000014203	snv
	2	118171406	A	C	0.472	F0-657	edited_step	fix	intergenic_region	MODIFIER	YTHDC2-ENSSSCG00000048145	ENSSSCG00000014211-ENSSSCG00000048145	snv
	2	118516510	C	A	0.548387	F0-657	nuclear_transfor_step	fix	intron_variant	MODIFIER	KCNN2	ENSSSCG00000014213	snv
	2	118704092	T	A	0.429825	F0-657	edited_step	fix	intron_variant	MODIFIER	KCNN2	ENSSSCG00000014213	snv
	2	120115980	C	T	0.357143	F0-657	edited_step	fix	upstream_gene_variant	MODIFIER	LVRN	ENSSSCG00000014221	snv
	2	120631533	A	G	0.0694444	F0-657	edited_step	fix	intron_variant	MODIFIER	SEMA6A	ENSSSCG00000014224	snv
	2	121144693	G	T	0.516393	F0-657	nuclear_transfor_step	fix	intergenic_region	MODIFIER	ENSSSCG00000050647-ENSSSCG00000043774	ENSSSCG00000050647-ENSSSCG00000043774	snv
	2	122048611	T	C	0.00952381	F0-657	isolation_step	fix	intergenic_region	MODIFIER	ENSSSCG00000043774-ENSSSCG00000051343	ENSSSCG00000043774-ENSSSCG00000051343	snv
	2	123448333	G	T	0.538462	F0-657	nuclear_transfor_step	fix	intergenic_region	MODIFIER	ENSSSCG00000050135-FAM170A	ENSSSCG00000050135-ENSSSCG00000014228	snv
	2	124851340	A	C	0.0232558	F0-657	edited_step	fix	intron_variant	MODIFIER	ENSSSCG00000041876	ENSSSCG00000041876	snv
	2	127808236	T	C	0.5	F0-657	edited_step	fix	intergenic_region	MODIFIER	ENSSSCG00000040936-ENSSSCG00000046335	ENSSSCG00000040936-ENSSSCG00000046335	snv
	2	127986087	G	A	0.479339	F0-657	edited_step	fix	intergenic_region	MODIFIER	ENSSSCG00000046335-ENSSSCG00000047314	ENSSSCG00000046335-ENSSSCG00000047314	snv
	2	133067819	A	C	0.520325	F0-657	nuclear_transfor_step	fix	intergenic_region	MODIFIER	ENSSSCG00000048403-ENSSSCG00000034342	ENSSSCG00000048403-ENSSSCG00000034342	snv
	2	138459862	T	G	0.477273	F0-657	nuclear_transfor_step	fix	intron_variant	MODIFIER	TRPC7	ENSSSCG00000014318	snv
	2	146746185	A	G	0.416667	F0-657	nuclear_transfor_step	fix	intergenic_region	MODIFIER	ENSSSCG00000039356-ENSSSCG00000048958	ENSSSCG00000039356-ENSSSCG00000048958	snv
	2	146894408	C	T	0.0681818	F0-657	edited_step	fix	intergenic_region	MODIFIER	ENSSSCG00000045989-PRELID2	ENSSSCG00000045989-ENSSSCG00000014406	snv
	2	147409413	G	T	0.513699	F0-657	nuclear_transfor_step	fix	intron_variant	MODIFIER	SH3RF2	ENSSSCG00000014410	snv
	2	147951114	C	G	0.409091	F0-657	nuclear_transfor_step	fix	intron_variant	MODIFIER	PPP2R2B	ENSSSCG00000028976	snv
	2	148667937	G	A	0.686275	F0-657	edited_step	fix	intron_variant	MODIFIER	DPYSL3	ENSSSCG00000036549	snv
	2	151736236	C	A	0.567568	F0-657	edited_step	fix	intron_variant	MODIFIER	DCTN4	ENSSSCG00000021427	snv
	3	3758332	G	A	0.00854701	F0-657	isolation_step	fix	intron_variant	MODIFIER	ENSSSCG00000007578	ENSSSCG00000007578	snv
	3	13719539	T	G	0.518072	F0-657	edited_step	fix	intron_variant	MODIFIER	AUTS2	ENSSSCG00000007727	snv
	3	14165238	A	G	0.477778	F0-657	edited_step	fix	intron_variant	MODIFIER	AUTS2	ENSSSCG00000007727	snv
	3	14247940	A	G	0.503876	F0-657	nuclear_transfor_step	fix	intron_variant	MODIFIER	AUTS2	ENSSSCG00000007727	snv
	3	14300286	G	A	0.506494	F0-657	edited_step	fix	intron_variant	MODIFIER	AUTS2	ENSSSCG00000007727	snv
	3	19340642	C	A	0.512821	F0-657	edited_step	fix	intron_variant	MODIFIER	KIAA0556	ENSSSCG00000007814	snv
	3	23189300	A	T	0.495413	F0-657	nuclear_transfor_step	fix	intergenic_region	MODIFIER	ENSSSCG00000044627-HS3ST2	ENSSSCG00000044627-ENSSSCG00000036475	snv
	3	29556704	A	T	0.511811	F0-657	edited_step	fix	intergenic_region	MODIFIER	ENSSSCG00000050963-ENSSSCG00000048744	ENSSSCG00000050963-ENSSSCG00000048744	snv
	3	29557960	A	G	0.457831	F0-657	edited_step	fix	intergenic_region	MODIFIER	ENSSSCG00000050963-ENSSSCG00000048744	ENSSSCG00000050963-ENSSSCG00000048744	snv
	3	29566089	C	G	0.504673	F0-657	edited_step	fix	intergenic_region	MODIFIER	ENSSSCG00000050963-ENSSSCG00000048744	ENSSSCG00000050963-ENSSSCG00000048744	snv
	3	30115809	A	C	0.375	F0-657	edited_step	fix	intron_variant	MODIFIER	SHISA9	ENSSSCG00000032878	snv
	3	32820495	G	T	0.616822	F0-657	nuclear_transfor_step	fix	intron_variant	MODIFIER	GRIN2A	ENSSSCG00000031290	snv
	3	35000497	C	A	0.00892857	F0-657	edited_step	fix	intron_variant	MODIFIER	RBFOX1	ENSSSCG00000007917	snv
	3	35260965	T	A	0.5625	F0-657	edited_step	fix	intron_variant	MODIFIER	RBFOX1	ENSSSCG00000007917	snv
	3	35285053	A	G	0.00847458	F0-657	edited_step	fix	intron_variant	MODIFIER	RBFOX1	ENSSSCG00000007917	snv
	3	36229800	T	C	0.454545	F0-657	edited_step	fix	intron_variant	MODIFIER	RBFOX1	ENSSSCG00000007917	snv
	3	36427023	T	G	0.443396	F0-657	edited_step	fix	intron_variant	MODIFIER	RBFOX1	ENSSSCG00000007917	snv
	3	36999713	G	T	0.539683	F0-657	edited_step	fix	intron_variant	MODIFIER	RBFOX1	ENSSSCG00000007917	snv
	3	38713373	C	T	0.646154	F0-657	edited_step	fix	downstream_gene_variant	MODIFIER	CLUAP1	ENSSSCG00000007955	snv
	3	44775611	G	A	0.328358	F0-657	edited_step	fix	intergenic_region	MODIFIER	ENSSSCG00000046783-ENSSSCG00000051025	ENSSSCG00000046783-ENSSSCG00000051025	snv
	3	52142731	A	C	0.484848	F0-657	edited_step	fix	downstream_gene_variant	MODIFIER	ENSSSCG00000037359	ENSSSCG00000037359	snv
	3	53072140	A	G	0.54321	F0-657	edited_step	fix	downstream_gene_variant	MODIFIER	RNF149	ENSSSCG00000008168	snv
	3	54386748	T	G	0.548077	F0-657	edited_step	fix	intron_variant	MODIFIER	REV1	ENSSSCG00000008179	snv
	3	62118110	T	A	0.423423	F0-657	nuclear_transfor_step	fix	intergenic_region	MODIFIER	U6-U6	ENSSSCG00000035540-ENSSSCG00000024141	snv
	3	62361445	T	C	0.466667	F0-657	edited_step	fix	intergenic_region	MODIFIER	U6-U6	ENSSSCG00000035540-ENSSSCG00000024141	snv
	3	63333540	A	G	0.245098	F0-657	edited_step	fix	intron_variant	MODIFIER	ENSSSCG00000008250	ENSSSCG00000008250	snv
	3	64498521	A	C	0.021978	F0-657	edited_step	fix	intergenic_region	MODIFIER	ENSSSCG00000008250-ENSSSCG00000037620	ENSSSCG00000008250-ENSSSCG00000037620	snv
	3	67441532	G	T	0.515152	F0-657	nuclear_transfor_step	fix	downstream_gene_variant	MODIFIER	ENSSSCG00000042558	ENSSSCG00000042558	snv
	3	71699527	C	T	0.188679	F0-657	edited_step	fix	downstream_gene_variant	MODIFIER	CLEC4F	ENSSSCG00000023258	snv
	3	77052443	T	G	0.583333	F0-657	edited_step	fix	intergenic_region	MODIFIER	U3-SERTAD2	ENSSSCG00000041193-ENSSSCG00000037002	snv
	3	79390187	G	T	0.546763	F0-657	nuclear_transfor_step	fix	intergenic_region	MODIFIER	EHBP1-TMEM17	ENSSSCG00000008372-ENSSSCG00000026713	snv
	3	82788693	G	T	0.485437	F0-657	edited_step	fix	intergenic_region	MODIFIER	ENSSSCG00000042890-ENSSSCG00000042483	ENSSSCG00000042890-ENSSSCG00000042483	snv
	3	83953857	G	T	0.465517	F0-657	nuclear_transfor_step	fix	intron_variant	MODIFIER	ENSSSCG00000049247	ENSSSCG00000049247	snv
	3	84001309	C	G	0.45098	F0-657	edited_step	fix	intron_variant	MODIFIER	ENSSSCG00000049247	ENSSSCG00000049247	snv
	3	84130033	T	G	0.544554	F0-657	edited_step	fix	intron_variant	MODIFIER	ENSSSCG00000049247	ENSSSCG00000049247	snv
	3	85025896	G	T	0.535714	F0-657	nuclear_transfor_step	fix	intron_variant	MODIFIER	CCDC85A	ENSSSCG00000008396	snv
	3	85116285	C	T	0.034188	F0-657	edited_step	fix	intron_variant	MODIFIER	CCDC85A	ENSSSCG00000008396	snv
	3	87319199	T	C	0.0882353	F0-657	edited_step	fix	intron_variant	MODIFIER	PSME4	ENSSSCG00000008412	snv
	3	89461807	A	C	0.517857	F0-657	edited_step	fix	intergenic_region	MODIFIER	ENSSSCG00000044218-ENSSSCG00000046380	ENSSSCG00000044218-ENSSSCG00000046380	snv
	3	90349732	C	A	0.576471	F0-657	edited_step	fix	intron_variant	MODIFIER	NRXN1	ENSSSCG00000026180	snv
	3	90541770	A	C	0.474227	F0-657	edited_step	fix	intron_variant	MODIFIER	NRXN1	ENSSSCG00000026180	snv
	3	90562045	G	A	0.0123457	F0-657	edited_step	fix	intron_variant	MODIFIER	NRXN1	ENSSSCG00000026180	snv
	3	90670984	G	A	0.457447	F0-657	edited_step	fix	upstream_gene_variant	MODIFIER	ENSSSCG00000048824	ENSSSCG00000048824	snv
	3	97474660	C	T	0.462069	F0-657	nuclear_transfor_step	fix	intergenic_region	MODIFIER	ENSSSCG00000051523-ssc-mir-9855-1	ENSSSCG00000051523-ENSSSCG00000036525	snv
	3	98863523	G	T	0.0327869	F0-657	edited_step	fix	intergenic_region	MODIFIER	ENSSSCG00000045166-ENSSSCG00000046007	ENSSSCG00000045166-ENSSSCG00000046007	snv
	3	99715299	C	G	0.420635	F0-657	nuclear_transfor_step	fix	intergenic_region	MODIFIER	ENSSSCG00000048362-ENSSSCG00000043111	ENSSSCG00000048362-ENSSSCG00000043111	snv
	3	101178943	G	C	0.508197	F0-657	nuclear_transfor_step	fix	intron_variant	MODIFIER	SOS1	ENSSSCG00000008478	snv
	3	101669369	T	C	0.589474	F0-657	edited_step	fix	intron_variant	MODIFIER	GALM	ENSSSCG00000008486	snv
	3	102847610	T	G	0.521739	F0-657	nuclear_transfor_step	fix	upstream_gene_variant	MODIFIER	PRKD3	ENSSSCG00000008495	snv
	3	104801469	T	G	0.520661	F0-657	edited_step	fix	intron_variant	MODIFIER	ENSSSCG00000044766	ENSSSCG00000044766	snv
	3	105271011	G	T	0.116071	F0-657	edited_step	fix	intergenic_region	MODIFIER	ENSSSCG00000044766-ENSSSCG00000044060	ENSSSCG00000044766-ENSSSCG00000044060	snv
	3	107656595	T	A	0.0153846	F0-657	isolation_step	fix	3_prime_UTR_variant	MODIFIER	MEMO1	ENSSSCG00000008515	snv
	3	107657291	T	G	0.582418	F0-657	edited_step	fix	3_prime_UTR_variant	MODIFIER	MEMO1	ENSSSCG00000008515	snv
	3	108376100	G	C	0.627273	F0-657	nuclear_transfor_step	fix	intron_variant	MODIFIER	GALNT14	ENSSSCG00000008524	snv
	3	108800609	T	C	0.453125	F0-657	edited_step	fix	intron_variant	MODIFIER	LCLAT1	ENSSSCG00000025901	snv
	3	109494002	C	A	0.0677966	F0-657	edited_step	fix	intron_variant	MODIFIER	ENSSSCG00000008533	ENSSSCG00000008533	snv
	3	111203367	A	G	0.506024	F0-657	edited_step	fix	intron_variant	MODIFIER	BABAM2	ENSSSCG00000026465	snv
	3	115685775	A	G	0.552381	F0-657	edited_step	fix	intergenic_region	MODIFIER	ENSSSCG00000047802-ENSSSCG00000044002	ENSSSCG00000047802-ENSSSCG00000044002	snv
	3	116497065	A	G	0.380952	F0-657	edited_step	fix	intron_variant	MODIFIER	ENSSSCG00000048838	ENSSSCG00000048838	snv
	3	116636669	C	A	0.485437	F0-657	nuclear_transfor_step	fix	intergenic_region	MODIFIER	ENSSSCG00000048838-ENSSSCG00000047014	ENSSSCG00000048838-ENSSSCG00000047014	snv
	3	117161478	C	G	0.44	F0-657	nuclear_transfor_step	fix	intergenic_region	MODIFIER	ENSSSCG00000047014-APOB	ENSSSCG00000047014-ENSSSCG00000008595	snv
	3	119720783	A	G	0.5	F0-657	nuclear_transfor_step	fix	intergenic_region	MODIFIER	RDH14-KCNS3	ENSSSCG00000008608-ENSSSCG00000031905	snv
	3	120631014	C	G	0.0294118	F0-657	edited_step	fix	intergenic_region	MODIFIER	U6-ENSSSCG00000041363	ENSSSCG00000023910-ENSSSCG00000041363	snv
	3	121311741	C	A	0.443478	F0-657	edited_step	fix	intergenic_region	MODIFIER	FAM49A-ENSSSCG00000043156	ENSSSCG00000008617-ENSSSCG00000043156	snv
	3	122757370	G	T	0.0909091	F0-657	edited_step	fix	intergenic_region	MODIFIER	LRATD1-ENSSSCG00000045589	ENSSSCG00000008664-ENSSSCG00000045589	snv
	3	123281318	G	T	0.464646	F0-657	edited_step	fix	intergenic_region	MODIFIER	U2-ENSSSCG00000041405	ENSSSCG00000042494-ENSSSCG00000041405	snv
	3	125633163	A	G	0.45283	F0-657	edited_step	fix	downstream_gene_variant	MODIFIER	ENSSSCG00000048451	ENSSSCG00000048451	snv
	3	128440943	A	C	0.558559	F0-657	nuclear_transfor_step	fix	intergenic_region	MODIFIER	ENSSSCG00000046300-ENSSSCG00000043310	ENSSSCG00000046300-ENSSSCG00000043310	snv
	3	129364603	A	C	0.45977	F0-657	edited_step	fix	intergenic_region	MODIFIER	U6-ENSSSCG00000033103	ENSSSCG00000020026-ENSSSCG00000033103	snv
	3	130249237	C	G	0.353659	F0-657	edited_step	fix	intergenic_region	MODIFIER	ENSSSCG00000043096-ENSSSCG00000044606	ENSSSCG00000043096-ENSSSCG00000044606	snv
	3	131639207	G	A	0.0166667	F0-657	edited_step	fix	intergenic_region	MODIFIER	ENSSSCG00000049109-ENSSSCG00000049751	ENSSSCG00000049109-ENSSSCG00000049751	snv
	4	323223	C	T	0.5	F0-657	nuclear_transfor_step	fix	upstream_gene_variant	MODIFIER	GPT	ENSSSCG00000005901	snv
	4	2949021	G	A	0.495652	F0-657	nuclear_transfor_step	fix	intron_variant	MODIFIER	AGO2	ENSSSCG00000005935	snv
	4	3467098	G	A	0.587302	F0-657	edited_step	fix	intron_variant	MODIFIER	TRAPPC9	ENSSSCG00000005934	snv
	4	4117887	C	A	0.555556	F0-657	edited_step	fix	intron_variant	MODIFIER	COL22A1	ENSSSCG00000005938	snv
	4	4922544	A	G	0.0153846	F0-657	edited_step	fix	intergenic_region	MODIFIER	ENSSSCG00000051617-ENSSSCG00000043372	ENSSSCG00000051617-ENSSSCG00000043372	snv
	4	5878514	C	A	0.491228	F0-657	edited_step	fix	intergenic_region	MODIFIER	ENSSSCG00000049175-ENSSSCG00000045100	ENSSSCG00000049175-ENSSSCG00000045100	snv
	4	7225044	T	A	0.0322581	F0-657	edited_step	fix	intron_variant	MODIFIER	ZFAT	ENSSSCG00000030947	snv
	4	8988646	G	A	0.0194175	F0-657	edited_step	fix	intergenic_region	MODIFIER	KCNQ3-HHLA1	ENSSSCG00000005953-ENSSSCG00000022257	snv
	4	9741980	G	A	0.491071	F0-657	edited_step	fix	intron_variant	MODIFIER	ADCY8	ENSSSCG00000031717	snv
	4	10511341	C	A	0.513043	F0-657	nuclear_transfor_step	fix	intron_variant	MODIFIER	ENSSSCG00000005959	ENSSSCG00000005959	snv
	4	11110933	T	G	0.431579	F0-657	edited_step	fix	intron_variant	MODIFIER	ENSSSCG00000047619	ENSSSCG00000047619	snv
	4	12256976	G	T	0.541667	F0-657	edited_step	fix	intron_variant	MODIFIER	ENSSSCG00000046151	ENSSSCG00000046151	snv
	4	14778013	G	A	0.510638	F0-657	nuclear_transfor_step	fix	intron_variant	MODIFIER	ENSSSCG00000005971	ENSSSCG00000005971	snv
	4	16600335	G	T	0.429907	F0-657	edited_step	fix	intron_variant	MODIFIER	ENSSSCG00000050319	ENSSSCG00000050319	snv
	4	18257822	A	C	0.471074	F0-657	edited_step	fix	intergenic_region	MODIFIER	ENSSSCG00000013683-ENSSSCG00000049444	ENSSSCG00000013683-ENSSSCG00000049444	snv
	4	24930185	A	G	0.39	F0-657	edited_step	fix	intron_variant	MODIFIER	CSMD3	ENSSSCG00000031031	snv
	4	25198602	T	G	0.521739	F0-657	edited_step	fix	intron_variant	MODIFIER	CSMD3	ENSSSCG00000031031	snv
	4	25687600	G	C	0.486486	F0-657	edited_step	fix	intron_variant	MODIFIER	CSMD3	ENSSSCG00000031031	snv
	4	27324530	T	G	0.464	F0-657	edited_step	fix	intergenic_region	MODIFIER	ENSSSCG00000050139-ENSSSCG00000050037	ENSSSCG00000050139-ENSSSCG00000050037	snv
	4	27404014	A	G	0.010989	F0-657	isolation_step	fix	intron_variant	MODIFIER	ENSSSCG00000050037	ENSSSCG00000050037	snv
	4	27592050	C	G	0.0103093	F0-657	isolation_step	fix	intergenic_region	MODIFIER	ENSSSCG00000050037-KCNV1	ENSSSCG00000050037-ENSSSCG00000006021	snv
	4	29763621	G	A	0.537037	F0-657	edited_step	fix	intergenic_region	MODIFIER	U6-ANGPT1	ENSSSCG00000018259-ENSSSCG00000006035	snv
	4	30058953	A	G	0.388889	F0-657	edited_step	fix	intron_variant	MODIFIER	ANGPT1	ENSSSCG00000006035	snv
	4	30873343	T	C	0.43617	F0-657	nuclear_transfor_step	fix	intron_variant	MODIFIER	OXR1	ENSSSCG00000006037	snv
	4	36800720	G	A	0.493671	F0-657	edited_step	fix	intron_variant	MODIFIER	SPAG1	ENSSSCG00000027587	snv
	4	42035380	C	T	0.595041	F0-657	nuclear_transfor_step	fix	synonymous_variant	LOW	ESRP1	ENSSSCG00000006099	snv
	4	46579490	G	T	0.407767	F0-657	edited_step	fix	intergenic_region	MODIFIER	ENSSSCG00000051779-CALB1	ENSSSCG00000051779-ENSSSCG00000006125	snv
	4	47754797	A	C	0.0188679	F0-657	edited_step	fix	intergenic_region	MODIFIER	ENSSSCG00000044847-U6	ENSSSCG00000044847-ENSSSCG00000036196	snv
	4	49183288	A	G	0.39726	F0-657	edited_step	fix	intergenic_region	MODIFIER	MMP16-CNBD1	ENSSSCG00000006132-ENSSSCG00000036161	snv
	4	50934491	A	G	0.481132	F0-657	nuclear_transfor_step	fix	intergenic_region	MODIFIER	ATP6V0D2-CA2	ENSSSCG00000006138-ENSSSCG00000006140	snv
	4	52394168	T	C	0.426471	F0-657	edited_step	fix	intron_variant	MODIFIER	RALYL	ENSSSCG00000006149	snv
	4	53409174	A	G	0.545455	F0-657	nuclear_transfor_step	fix	intergenic_region	MODIFIER	ENSSSCG00000049545-ENSSSCG00000048719	ENSSSCG00000049545-ENSSSCG00000048719	snv
	4	54269867	A	G	0.427481	F0-657	nuclear_transfor_step	fix	intergenic_region	MODIFIER	ENSSSCG00000045469-ENSSSCG00000042001	ENSSSCG00000045469-ENSSSCG00000042001	snv
	4	55053307	A	G	0.478992	F0-657	nuclear_transfor_step	fix	intergenic_region	MODIFIER	IMPA1-FABP4	ENSSSCG00000033791-ENSSSCG00000040681	snv
	4	56651851	A	G	0.0119048	F0-657	isolation_step	fix	intron_variant	MODIFIER	MRPS28	ENSSSCG00000037782	snv
	4	60839834	T	G	0.5	F0-657	nuclear_transfor_step	fix	intergenic_region	MODIFIER	HNF4G-CRISPLD1	ENSSSCG00000034242-ENSSSCG00000006171	snv
	4	68702133	C	T	0.69863	F0-657	edited_step	fix	intergenic_region	MODIFIER	DNAJC5B-PDE7A	ENSSSCG00000006217-ENSSSCG00000006218	snv
	4	69363997	C	T	0.496241	F0-657	nuclear_transfor_step	fix	intron_variant	MODIFIER	ENSSSCG00000042827	ENSSSCG00000042827	snv
	4	70372482	C	T	0.489362	F0-657	edited_step	fix	intergenic_region	MODIFIER	ENSSSCG00000041375-ENSSSCG00000048671	ENSSSCG00000041375-ENSSSCG00000048671	snv
	4	71567570	T	C	0.482759	F0-657	nuclear_transfor_step	fix	intergenic_region	MODIFIER	ENSSSCG00000042611-ENSSSCG00000044388	ENSSSCG00000042611-ENSSSCG00000044388	snv
	4	73091570	G	T	0.327273	F0-657	edited_step	fix	intron_variant	MODIFIER	CA8	ENSSSCG00000006233	snv
	4	73725955	A	T	0.495798	F0-657	nuclear_transfor_step	fix	intergenic_region	MODIFIER	ENSSSCG00000049948-ENSSSCG00000033386	ENSSSCG00000049948-ENSSSCG00000033386	snv
	4	74611208	G	A	0.516129	F0-657	edited_step	fix	downstream_gene_variant	MODIFIER	FAM110B	ENSSSCG00000006240	snv
	4	75419281	C	A	0.47619	F0-657	edited_step	fix	intron_variant	MODIFIER	ENSSSCG00000045246	ENSSSCG00000045246	snv
	4	76467034	G	T	0.0531915	F0-657	edited_step	fix	intergenic_region	MODIFIER	XKR4-ENSSSCG00000044763	ENSSSCG00000031813-ENSSSCG00000044763	snv
	4	76614448	G	C	0.54023	F0-657	edited_step	fix	intergenic_region	MODIFIER	ENSSSCG00000046734-ENSSSCG00000031906	ENSSSCG00000046734-ENSSSCG00000031906	snv
	4	78381237	C	T	0.581818	F0-657	edited_step	fix	intergenic_region	MODIFIER	ENSSSCG00000051470-SNTG1	ENSSSCG00000051470-ENSSSCG00000034495	snv
	4	78562936	A	C	0.576271	F0-657	nuclear_transfor_step	fix	synonymous_variant	LOW	SNTG1	ENSSSCG00000034495	snv
	4	82502918	G	A	0.5	F0-657	edited_step	fix	intergenic_region	MODIFIER	ENSSSCG00000037962-ENSSSCG00000046558	ENSSSCG00000037962-ENSSSCG00000046558	snv
	4	84319482	C	T	0.555556	F0-657	edited_step	fix	intron_variant	MODIFIER	ENSSSCG00000006320	ENSSSCG00000006320	snv
	4	89720043	G	T	0.471698	F0-657	edited_step	fix	synonymous_variant	LOW	LY9	ENSSSCG00000006375	snv
	4	91120179	A	T	0.535211	F0-657	edited_step	fix	intron_variant	MODIFIER	FCER1A	ENSSSCG00000006413	snv
	4	106727055	T	C	0.0645161	F0-657	edited_step	fix	intron_variant	MODIFIER	PTPN22	ENSSSCG00000006764	snv
	4	108366977	G	T	0.60241	F0-657	nuclear_transfor_step	fix	intergenic_region	MODIFIER	ENSSSCG00000046315-ENSSSCG00000046107	ENSSSCG00000046315-ENSSSCG00000046107	snv
	4	113420491	G	T	0.695122	F0-657	edited_step	fix	intergenic_region	MODIFIER	U6-ENSSSCG00000041856	ENSSSCG00000018415-ENSSSCG00000041856	snv
	4	114275031	T	G	0.408163	F0-657	nuclear_transfor_step	fix	intergenic_region	MODIFIER	ENSSSCG00000041856-ENSSSCG00000035697	ENSSSCG00000041856-ENSSSCG00000035697	snv
	4	114369896	C	A	0.542056	F0-657	nuclear_transfor_step	fix	intergenic_region	MODIFIER	ENSSSCG00000041856-ENSSSCG00000035697	ENSSSCG00000041856-ENSSSCG00000035697	snv
	4	114454825	T	C	0.494624	F0-657	edited_step	fix	intergenic_region	MODIFIER	ENSSSCG00000041856-ENSSSCG00000035697	ENSSSCG00000041856-ENSSSCG00000035697	snv
	4	116250529	A	G	0.57	F0-657	edited_step	fix	intergenic_region	MODIFIER	ENSSSCG00000042916-OLFM3	ENSSSCG00000042916-ENSSSCG00000006858	snv
	4	119554134	G	C	0.0620155	F0-657	edited_step	fix	intergenic_region	MODIFIER	ENSSSCG00000042635-ENSSSCG00000045360	ENSSSCG00000042635-ENSSSCG00000045360	snv
	4	119872261	T	C	0.438776	F0-657	edited_step	fix	intergenic_region	MODIFIER	ENSSSCG00000045731-DPYD	ENSSSCG00000045731-ENSSSCG00000006878	snv
	4	120127297	C	A	0.451923	F0-657	edited_step	fix	intron_variant	MODIFIER	DPYD	ENSSSCG00000006878	snv
	4	120127594	A	G	0.564356	F0-657	nuclear_transfor_step	fix	intron_variant	MODIFIER	DPYD	ENSSSCG00000006878	snv
	4	126094076	A	C	0.340206	F0-657	nuclear_transfor_step	fix	intergenic_region	MODIFIER	U6-ENSSSCG00000043214	ENSSSCG00000023240-ENSSSCG00000043214	snv
	4	129482699	G	T	0.42623	F0-657	nuclear_transfor_step	fix	intron_variant	MODIFIER	CLCA1	ENSSSCG00000006933	snv
	5	2379816	G	A	0.451923	F0-657	edited_step	fix	intergenic_region	MODIFIER	ENSSSCG00000034275-ENSSSCG00000047658	ENSSSCG00000034275-ENSSSCG00000047658	snv
	5	3988471	C	A	0.278351	F0-657	edited_step	fix	intron_variant	MODIFIER	SMC1B	ENSSSCG00000032971	snv
	5	7305100	T	A	0.163636	F0-657	edited_step	fix	intergenic_region	MODIFIER	ENSSSCG00000045392-EP300	ENSSSCG00000045392-ENSSSCG00000000068	snv
	5	12384474	C	A	0.464567	F0-657	nuclear_transfor_step	fix	intron_variant	MODIFIER	SYN3	ENSSSCG00000040453	snv
	5	16996336	A	C	0.521739	F0-657	edited_step	fix	intron_variant	MODIFIER	SCN8A	ENSSSCG00000000228	snv
	5	20204351	C	T	0.317949	F0-657	nuclear_transfor_step	fix	downstream_gene_variant	MODIFIER	ENSSSCG00000050921	ENSSSCG00000050921	snv
	5	25355528	C	T	0.382353	F0-657	edited_step	fix	intron_variant	MODIFIER	ENSSSCG00000045006	ENSSSCG00000045006	snv
	5	25512433	A	G	0.0232558	F0-657	edited_step	fix	intergenic_region	MODIFIER	ENSSSCG00000045006-U6	ENSSSCG00000045006-ENSSSCG00000032997	snv
	5	27314679	C	A	0.495413	F0-657	edited_step	fix	intron_variant	MODIFIER	PPM1H	ENSSSCG00000036751	snv
	5	30998264	C	A	0.566929	F0-657	nuclear_transfor_step	fix	intron_variant	MODIFIER	GRIP1	ENSSSCG00000000478	snv
	5	31489240	G	C	0.460177	F0-657	edited_step	fix	intergenic_region	MODIFIER	ssc-mir-9808-ENSSSCG00000049457	ENSSSCG00000038564-ENSSSCG00000049457	snv
	5	34697827	G	T	0.0576923	F0-657	edited_step	fix	intron_variant	MODIFIER	PTPRB	ENSSSCG00000000504	snv
	5	36452894	G	A	0.486842	F0-657	edited_step	fix	intron_variant	MODIFIER	TRHDE	ENSSSCG00000000515	snv
	5	36809105	T	A	0.464286	F0-657	nuclear_transfor_step	fix	intergenic_region	MODIFIER	U4-ENSSSCG00000044906	ENSSSCG00000044578-ENSSSCG00000044906	snv
	5	37196974	A	T	0.422535	F0-657	edited_step	fix	intergenic_region	MODIFIER	U4-ENSSSCG00000044906	ENSSSCG00000044578-ENSSSCG00000044906	snv
	5	38490901	G	T	0.530435	F0-657	edited_step	fix	intron_variant	MODIFIER	KCNC2	ENSSSCG00000000516	snv
	5	40573692	C	A	0.517544	F0-657	edited_step	fix	intergenic_region	MODIFIER	ENSSSCG00000038998-SYT10	ENSSSCG00000038998-ENSSSCG00000000527	snv
	5	40681016	A	C	0.416667	F0-657	edited_step	fix	intergenic_region	MODIFIER	ENSSSCG00000038998-SYT10	ENSSSCG00000038998-ENSSSCG00000000527	snv
	5	43778927	A	C	0.5	F0-657	edited_step	fix	intergenic_region	MODIFIER	U6-TMTC1	ENSSSCG00000019262-ENSSSCG00000027447	snv
	5	49876214	G	T	0.52	F0-657	edited_step	fix	intron_variant	MODIFIER	SOX5	ENSSSCG00000000567	snv
	5	50670869	G	T	0.283582	F0-657	edited_step	fix	intergenic_region	MODIFIER	ENSSSCG00000043313-ETNK1	ENSSSCG00000043313-ENSSSCG00000039397	snv
	5	50836625	T	C	0.377049	F0-657	edited_step	fix	intergenic_region	MODIFIER	ENSSSCG00000043313-ETNK1	ENSSSCG00000043313-ENSSSCG00000039397	snv
	5	54250357	G	A	0.447619	F0-657	edited_step	fix	intergenic_region	MODIFIER	ENSSSCG00000049512-ENSSSCG00000000589	ENSSSCG00000049512-ENSSSCG00000000589	snv
	5	54699089	G	C	0.626168	F0-657	edited_step	fix	intron_variant	MODIFIER	PIK3C2G	ENSSSCG00000000591	snv
	5	54995105	A	C	0.575	F0-657	edited_step	fix	upstream_gene_variant	MODIFIER	ENSSSCG00000042813	ENSSSCG00000042813	snv
	5	55012050	T	G	0.02	F0-657	isolation_step	fix	intergenic_region	MODIFIER	ENSSSCG00000042813-U6	ENSSSCG00000042813-ENSSSCG00000020547	snv
	5	55473216	C	T	0.52439	F0-657	nuclear_transfor_step	fix	upstream_gene_variant	MODIFIER	U6	ENSSSCG00000040455	snv
	5	58819760	C	T	0.521277	F0-657	edited_step	fix	intron_variant	MODIFIER	GRIN2B	ENSSSCG00000000614	snv
	5	61890521	A	G	0.465649	F0-657	nuclear_transfor_step	fix	intron_variant	MODIFIER	CLEC1B	ENSSSCG00000000650	snv
	5	66618640	C	G	0.00787402	F0-657	isolation_step	fix	intron_variant	MODIFIER	CRACR2A	ENSSSCG00000000732	snv
	5	68544011	G	T	0.396226	F0-657	edited_step	fix	downstream_gene_variant	MODIFIER	ENSSSCG00000050762	ENSSSCG00000050762	snv
	5	70709739	G	A	0.016129	F0-657	isolation_step	fix	intergenic_region	MODIFIER	CPNE8-KIF21A	ENSSSCG00000000778-ENSSSCG00000000779	snv
	5	72271099	A	C	0.540541	F0-657	nuclear_transfor_step	fix	intron_variant	MODIFIER	CNTN1	ENSSSCG00000000789	snv
	5	73022198	A	G	0.148148	F0-657	edited_step	fix	intergenic_region	MODIFIER	PDZRN4-ENSSSCG00000042251	ENSSSCG00000000791-ENSSSCG00000042251	snv
	5	73273562	G	A	0.322222	F0-657	nuclear_transfor_step	fix	intergenic_region	MODIFIER	ENSSSCG00000042251-ENSSSCG00000042974	ENSSSCG00000042251-ENSSSCG00000042974	snv
	5	75399204	T	G	0.510417	F0-657	edited_step	fix	intron_variant	MODIFIER	TMEM117	ENSSSCG00000000801	snv
	5	79078207	A	G	0.516667	F0-657	edited_step	fix	intergenic_region	MODIFIER	ENSSSCG00000044441-ENSSSCG00000049478	ENSSSCG00000044441-ENSSSCG00000049478	snv
	5	81194132	C	T	0.598485	F0-657	edited_step	fix	downstream_gene_variant	MODIFIER	ENSSSCG00000034578	ENSSSCG00000034578	snv
	5	82558148	G	A	0.413462	F0-657	edited_step	fix	3_prime_UTR_variant	MODIFIER	MYBPC1	ENSSSCG00000000866	snv
	5	83166220	A	G	0.466667	F0-657	edited_step	fix	intron_variant	MODIFIER	ANO4	ENSSSCG00000000873	snv
	5	84217981	C	A	0.441441	F0-657	nuclear_transfor_step	fix	intron_variant	MODIFIER	ANKS1B	ENSSSCG00000022083	snv
	5	84585619	G	T	0.52381	F0-657	nuclear_transfor_step	fix	intron_variant	MODIFIER	ANKS1B	ENSSSCG00000022083	snv
	5	85155048	T	A	0.597701	F0-657	edited_step	fix	intron_variant	MODIFIER	ANKS1B	ENSSSCG00000022083	snv
	5	86119897	A	C	0.0128205	F0-657	isolation_step	fix	intergenic_region	MODIFIER	ENSSSCG00000047916-ENSSSCG00000050424	ENSSSCG00000047916-ENSSSCG00000050424	snv
	5	86167443	A	C	0.564103	F0-657	nuclear_transfor_step	fix	intron_variant	MODIFIER	ENSSSCG00000050424	ENSSSCG00000050424	snv
	5	86243021	A	G	0.252033	F0-657	edited_step	fix	upstream_gene_variant	MODIFIER	ENSSSCG00000050424	ENSSSCG00000050424	snv
	5	86553440	T	A	0.00862069	F0-657	isolation_step	fix	intron_variant	MODIFIER	ENSSSCG00000050424	ENSSSCG00000050424	snv
	5	86573978	T	C	0.465753	F0-657	nuclear_transfor_step	fix	intron_variant	MODIFIER	ENSSSCG00000050424	ENSSSCG00000050424	snv
	5	86913921	A	G	0.5	F0-657	nuclear_transfor_step	fix	intergenic_region	MODIFIER	ENSSSCG00000050899-ENSSSCG00000033574	ENSSSCG00000050899-ENSSSCG00000033574	snv
	5	89864737	T	C	0.20339	F0-657	edited_step	fix	intron_variant	MODIFIER	ENSSSCG00000050072	ENSSSCG00000050072	snv
	5	90776854	T	C	0.444444	F0-657	edited_step	fix	intergenic_region	MODIFIER	ENSSSCG00000047285-ENSSSCG00000051556	ENSSSCG00000047285-ENSSSCG00000051556	snv
	5	94959721	G	A	0.468085	F0-657	edited_step	fix	intergenic_region	MODIFIER	C12orf50-ENSSSCG00000045175	ENSSSCG00000000924-ENSSSCG00000045175	snv
	5	95129220	T	A	0.0113636	F0-657	edited_step	fix	intron_variant	MODIFIER	ENSSSCG00000044094	ENSSSCG00000044094	snv
	5	95501304	T	C	0.482143	F0-657	edited_step	fix	intergenic_region	MODIFIER	ENSSSCG00000050070-ENSSSCG00000051589	ENSSSCG00000050070-ENSSSCG00000051589	snv
	5	96712947	G	T	0.473684	F0-657	nuclear_transfor_step	fix	intergenic_region	MODIFIER	RASSF9-ALX1	ENSSSCG00000034948-ENSSSCG00000036744	snv
	5	98600292	A	C	0.00970874	F0-657	isolation_step	fix	intergenic_region	MODIFIER	ENSSSCG00000048980-TMTC2	ENSSSCG00000048980-ENSSSCG00000024065	snv
	5	100452259	G	A	0.568421	F0-657	edited_step	fix	intron_variant	MODIFIER	ENSSSCG00000046153	ENSSSCG00000046153	snv
	5	100748694	G	A	0.548387	F0-657	edited_step	fix	downstream_gene_variant	MODIFIER	MYF5	ENSSSCG00000000937	snv
	5	103387416	G	T	0.0512821	F0-657	edited_step	fix	intergenic_region	MODIFIER	NAV3-ENSSSCG00000050143	ENSSSCG00000029249-ENSSSCG00000050143	snv
	5	103800982	T	A	0.509434	F0-657	edited_step	fix	upstream_gene_variant	MODIFIER	ENSSSCG00000049354	ENSSSCG00000049354	snv
	6	8892398	A	C	0.471698	F0-657	nuclear_transfor_step	fix	intergenic_region	MODIFIER	ENSSSCG00000044043-WWOX	ENSSSCG00000044043-ENSSSCG00000027415	snv
	6	9365484	C	G	0.0327869	F0-657	edited_step	fix	intron_variant	MODIFIER	WWOX	ENSSSCG00000027415	snv
	6	10041299	G	T	0.519608	F0-657	edited_step	fix	intron_variant	MODIFIER	VAT1L	ENSSSCG00000002696	snv
	6	11307522	C	A	0.0186916	F0-657	edited_step	fix	intergenic_region	MODIFIER	ENSSSCG00000044267-ENSSSCG00000023125	ENSSSCG00000044267-ENSSSCG00000023125	snv
	6	16171540	G	A	0.58209	F0-657	nuclear_transfor_step	fix	non_coding_transcript_exon_variant	MODIFIER	ENSSSCG00000041519	ENSSSCG00000041519	snv
	6	16850679	G	T	0.386667	F0-657	nuclear_transfor_step	fix	intergenic_region	MODIFIER	ENSSSCG00000048283-ENSSSCG00000046484	ENSSSCG00000048283-ENSSSCG00000046484	snv
	6	20944624	G	C	0.626263	F0-657	edited_step	fix	intergenic_region	MODIFIER	ENSSSCG00000048753-ENSSSCG00000047148	ENSSSCG00000048753-ENSSSCG00000047148	snv
	6	22631221	A	G	0.560976	F0-657	nuclear_transfor_step	fix	intergenic_region	MODIFIER	ENSSSCG00000045327-ENSSSCG00000046861	ENSSSCG00000045327-ENSSSCG00000046861	snv
	6	22830224	A	T	0.00813008	F0-657	isolation_step	fix	intergenic_region	MODIFIER	ENSSSCG00000045327-ENSSSCG00000046861	ENSSSCG00000045327-ENSSSCG00000046861	snv
	6	22918397	C	A	0.376238	F0-657	edited_step	fix	downstream_gene_variant	MODIFIER	CDH8	ENSSSCG00000040687	snv
	6	23104321	G	A	0.495146	F0-657	nuclear_transfor_step	fix	intron_variant	MODIFIER	CDH8	ENSSSCG00000040687	snv
	6	24366122	G	T	0.0111111	F0-657	edited_step	fix	intergenic_region	MODIFIER	ENSSSCG00000041084-U2	ENSSSCG00000041084-ENSSSCG00000044819	snv
	6	24678785	A	C	0.571429	F0-657	edited_step	fix	intergenic_region	MODIFIER	U2-ENSSSCG00000047893	ENSSSCG00000044819-ENSSSCG00000047893	snv
	6	26852522	C	A	0.47619	F0-657	nuclear_transfor_step	fix	intergenic_region	MODIFIER	U6-ENSSSCG00000046555	ENSSSCG00000036151-ENSSSCG00000046555	snv
	6	35666155	A	C	0.535714	F0-657	nuclear_transfor_step	fix	intergenic_region	MODIFIER	CBLN1-N4BP1	ENSSSCG00000040652-ENSSSCG00000002841	snv
	6	35776301	A	G	0.505155	F0-657	edited_step	fix	intergenic_region	MODIFIER	CBLN1-N4BP1	ENSSSCG00000040652-ENSSSCG00000002841	snv
	6	36750016	C	T	0.507812	F0-657	nuclear_transfor_step	fix	intergenic_region	MODIFIER	ABCC12-ENSSSCG00000043618	ENSSSCG00000022813-ENSSSCG00000043618	snv
	6	38864104	C	T	0.432692	F0-657	edited_step	fix	intergenic_region	MODIFIER	ENSSSCG00000044959-U6	ENSSSCG00000044959-ENSSSCG00000040014	snv
	6	41735414	G	T	0.465116	F0-657	nuclear_transfor_step	fix	intergenic_region	MODIFIER	ENSSSCG00000042479-ZNF507	ENSSSCG00000042479-ENSSSCG00000025139	snv
	6	44615095	G	T	0.321739	F0-657	nuclear_transfor_step	fix	5_prime_UTR_premature_start_codon_gain_variant	LOW	HPN	ENSSSCG00000021867	snv
	6	47456181	C	T	0.5	F0-657	edited_step	fix	downstream_gene_variant	MODIFIER	MAP4K1	ENSSSCG00000002962	snv
	6	50944100	G	T	0.103896	F0-657	edited_step	fix	intron_variant	MODIFIER	ENSSSCG00000003077	ENSSSCG00000003077	snv
	6	51658357	C	T	0.553571	F0-657	edited_step	fix	intron_variant	MODIFIER	ENSSSCG00000040410	ENSSSCG00000040410	snv
	6	54762084	G	A	0.569767	F0-657	edited_step	fix	3_prime_UTR_variant	MODIFIER	TSKS	ENSSSCG00000003191	snv
	6	56203705	G	T	0.621622	F0-657	nuclear_transfor_step	fix	intron_variant	MODIFIER	CACNG7	ENSSSCG00000025532	snv
	6	56650089	G	T	0.542553	F0-657	edited_step	fix	upstream_gene_variant	MODIFIER	ENSSSCG00000043052	ENSSSCG00000043052	snv
	6	57697491	T	C	0.542373	F0-657	nuclear_transfor_step	fix	upstream_gene_variant	MODIFIER	ENSSSCG00000048664	ENSSSCG00000048664	snv
	6	57862849	G	A	0.5	F0-657	nuclear_transfor_step	fix	intergenic_region	MODIFIER	ENSSSCG00000046884-PPP2R1A	ENSSSCG00000046884-ENSSSCG00000024413	snv
	6	58993474	T	G	0.476744	F0-657	edited_step	fix	upstream_gene_variant	MODIFIER	ENSSSCG00000037426	ENSSSCG00000037426	snv
	6	60711399	T	A	0.525974	F0-657	nuclear_transfor_step	fix	upstream_gene_variant	MODIFIER	ENSSSCG00000003322	ENSSSCG00000003322	snv
	6	60925760	C	G	0.414894	F0-657	edited_step	fix	intron_variant	MODIFIER	ZFP28	ENSSSCG00000027774	snv
	6	61077617	A	G	0.186813	F0-657	edited_step	fix	intergenic_region	MODIFIER	ENSSSCG00000022529-ENSSSCG00000032669	ENSSSCG00000022529-ENSSSCG00000032669	snv
	6	61944335	T	C	0.5	F0-657	edited_step	fix	downstream_gene_variant	MODIFIER	ZNF773	ENSSSCG00000039978	snv
	6	63658715	C	T	0.274725	F0-657	edited_step	fix	upstream_gene_variant	MODIFIER	AURKAIP1	ENSSSCG00000038474	snv
	6	64112041	C	T	0.626866	F0-657	edited_step	fix	intron_variant	MODIFIER	PRKCZ	ENSSSCG00000030361	snv
	6	64414140	G	A	0.506849	F0-657	edited_step	fix	upstream_gene_variant	MODIFIER	HES5	ENSSSCG00000037304	snv
	6	66157259	G	C	0.617978	F0-657	edited_step	fix	intergenic_region	MODIFIER	AJAP1-NPHP4	ENSSSCG00000031344-ENSSSCG00000029843	snv
	6	66168792	G	T	0.12381	F0-657	edited_step	fix	intergenic_region	MODIFIER	AJAP1-NPHP4	ENSSSCG00000031344-ENSSSCG00000029843	snv
	6	68406332	T	C	0.503704	F0-657	nuclear_transfor_step	fix	intron_variant	MODIFIER	CAMTA1	ENSSSCG00000036772	snv
	6	73498538	A	G	0.525547	F0-657	nuclear_transfor_step	fix	intron_variant	MODIFIER	KAZN	ENSSSCG00000037676	snv
	6	73498620	A	G	0.487603	F0-657	nuclear_transfor_step	fix	intron_variant	MODIFIER	KAZN	ENSSSCG00000037676	snv
	6	76912998	T	A	0.513158	F0-657	edited_step	fix	intron_variant	MODIFIER	IGSF21	ENSSSCG00000020992	snv
	6	76937154	C	T	0.534483	F0-657	edited_step	fix	intron_variant	MODIFIER	IGSF21	ENSSSCG00000020992	snv
	6	83766169	C	A	0.485294	F0-657	edited_step	fix	upstream_gene_variant	MODIFIER	ZNF683	ENSSSCG00000040579	snv
	6	90355049	A	G	0.439716	F0-657	nuclear_transfor_step	fix	intron_variant	MODIFIER	ENSSSCG00000049113	ENSSSCG00000049113	snv
	6	92557080	G	A	0.520548	F0-657	edited_step	fix	intron_variant	MODIFIER	CSF3R	ENSSSCG00000025795	snv
	6	92567206	C	A	0.549451	F0-657	nuclear_transfor_step	fix	upstream_gene_variant	MODIFIER	CSF3R	ENSSSCG00000025795	snv
	6	93805648	C	A	0.546875	F0-657	edited_step	fix	upstream_gene_variant	MODIFIER	EPHA10	ENSSSCG00000038675	snv
	6	94383511	C	A	0.333333	F0-657	edited_step	fix	intergenic_region	MODIFIER	POU3F1-ENSSSCG00000044365	ENSSSCG00000003646-ENSSSCG00000044365	snv
	6	98206595	C	G	0.47651	F0-657	nuclear_transfor_step	fix	downstream_gene_variant	MODIFIER	VAPA	ENSSSCG00000038465	snv
	6	102016864	A	C	0.396396	F0-657	edited_step	fix	intergenic_region	MODIFIER	ENSSSCG00000044910-DLGAP1	ENSSSCG00000044910-ENSSSCG00000003690	snv
	6	102016881	T	C	0.445455	F0-657	edited_step	fix	intergenic_region	MODIFIER	ENSSSCG00000044910-DLGAP1	ENSSSCG00000044910-ENSSSCG00000003690	snv
	6	102120767	T	C	0.455357	F0-657	edited_step	fix	intergenic_region	MODIFIER	ENSSSCG00000044910-DLGAP1	ENSSSCG00000044910-ENSSSCG00000003690	snv
	6	104390169	C	A	0.602151	F0-657	nuclear_transfor_step	fix	intron_variant	MODIFIER	METTL4	ENSSSCG00000034816	snv
	6	111151544	T	G	0.491228	F0-657	nuclear_transfor_step	fix	upstream_gene_variant	MODIFIER	ENSSSCG00000003719	ENSSSCG00000003719	snv
	6	111718088	C	A	0.47541	F0-657	edited_step	fix	intron_variant	MODIFIER	CHST9	ENSSSCG00000003721	snv
	6	111969689	T	C	0.365854	F0-657	nuclear_transfor_step	fix	intergenic_region	MODIFIER	ENSSSCG00000043432-ENSSSCG00000042906	ENSSSCG00000043432-ENSSSCG00000042906	snv
	6	113556492	A	G	0.418182	F0-657	edited_step	fix	intergenic_region	MODIFIER	ENSSSCG00000049932-ENSSSCG00000045075	ENSSSCG00000049932-ENSSSCG00000045075	snv
	6	113746027	A	G	0.494949	F0-657	edited_step	fix	intergenic_region	MODIFIER	ENSSSCG00000045075-ENSSSCG00000043812	ENSSSCG00000045075-ENSSSCG00000043812	snv
	6	113746165	A	G	0.209524	F0-657	edited_step	fix	intergenic_region	MODIFIER	ENSSSCG00000045075-ENSSSCG00000043812	ENSSSCG00000045075-ENSSSCG00000043812	snv
	6	113891596	A	T	0.456522	F0-657	edited_step	fix	intergenic_region	MODIFIER	ENSSSCG00000043812-ENSSSCG00000041345	ENSSSCG00000043812-ENSSSCG00000041345	snv
	6	115539783	T	G	0.55914	F0-657	edited_step	fix	intron_variant	MODIFIER	B4GALT6	ENSSSCG00000025005	snv
	6	117701636	A	G	0.384615	F0-657	edited_step	fix	intron_variant	MODIFIER	NOL4	ENSSSCG00000003737	snv
	6	118437332	T	G	0.540541	F0-657	edited_step	fix	intron_variant	MODIFIER	DTNA	ENSSSCG00000028047	snv
	6	121323996	C	A	0.634146	F0-657	edited_step	fix	intron_variant	MODIFIER	CELF4	ENSSSCG00000003748	snv
	6	122436573	A	C	0.444444	F0-657	edited_step	fix	intergenic_region	MODIFIER	ENSSSCG00000045450-ENSSSCG00000049226	ENSSSCG00000045450-ENSSSCG00000049226	snv
	6	122840434	A	T	0.483146	F0-657	edited_step	fix	intergenic_region	MODIFIER	ENSSSCG00000045450-ENSSSCG00000049226	ENSSSCG00000045450-ENSSSCG00000049226	snv
	6	123519082	A	C	0.518519	F0-657	nuclear_transfor_step	fix	intergenic_region	MODIFIER	ENSSSCG00000049226-ENSSSCG00000033723	ENSSSCG00000049226-ENSSSCG00000033723	snv
	6	124797087	A	T	0.540816	F0-657	edited_step	fix	intergenic_region	MODIFIER	ENSSSCG00000047699-ENSSSCG00000042285	ENSSSCG00000047699-ENSSSCG00000042285	snv
	6	125312208	A	G	0.44	F0-657	edited_step	fix	intergenic_region	MODIFIER	ENSSSCG00000042285-ENSSSCG00000038382	ENSSSCG00000042285-ENSSSCG00000038382	snv
	6	126710921	T	C	0.472603	F0-657	nuclear_transfor_step	fix	intergenic_region	MODIFIER	ENSSSCG00000037233-SYT4	ENSSSCG00000037233-ENSSSCG00000037079	snv
	6	127037746	A	G	0.487395	F0-657	nuclear_transfor_step	fix	intergenic_region	MODIFIER	ENSSSCG00000037233-SYT4	ENSSSCG00000037233-ENSSSCG00000037079	snv
	6	127872061	C	T	0.524194	F0-657	nuclear_transfor_step	fix	intron_variant	MODIFIER	KCNG2	ENSSSCG00000005780	snv
	6	131215793	G	A	0.496183	F0-657	edited_step	fix	intergenic_region	MODIFIER	ENSSSCG00000044932-ADGRL2	ENSSSCG00000044932-ENSSSCG00000003761	snv
	6	132328183	A	C	0.436893	F0-657	edited_step	fix	intron_variant	MODIFIER	ADGRL2	ENSSSCG00000003761	snv
	6	133322985	A	G	0.526882	F0-657	edited_step	fix	intergenic_region	MODIFIER	U1-ENSSSCG00000027421	ENSSSCG00000050555-ENSSSCG00000027421	snv
	6	134001470	T	C	0.5	F0-657	edited_step	fix	intergenic_region	MODIFIER	ENSSSCG00000043601-SNORA70	ENSSSCG00000043601-ENSSSCG00000034573	snv
	6	134470937	C	G	0.0288462	F0-657	edited_step	fix	intergenic_region	MODIFIER	ADGRL4-IFI44	ENSSSCG00000003762-ENSSSCG00000003763	snv
	6	136020336	C	G	0.441176	F0-657	edited_step	fix	5_prime_UTR_variant	MODIFIER	AK5	ENSSSCG00000003773	snv
	6	136986141	C	T	0.00877193	F0-657	edited_step	fix	intron_variant	MODIFIER	ST6GALNAC3	ENSSSCG00000024494	snv
	6	137272171	C	T	0.398058	F0-657	nuclear_transfor_step	fix	intergenic_region	MODIFIER	U6-ASB17	ENSSSCG00000024120-ENSSSCG00000031522	snv
	6	137760269	C	T	0.465909	F0-657	edited_step	fix	intron_variant	MODIFIER	SLC44A5	ENSSSCG00000003777	snv
	6	138051074	A	T	0.605634	F0-657	edited_step	fix	intergenic_region	MODIFIER	SLC44A5-LHX8	ENSSSCG00000003777-ENSSSCG00000003778	snv
	6	139074801	T	G	0.578947	F0-657	edited_step	fix	downstream_gene_variant	MODIFIER	LRRIQ3	ENSSSCG00000003784	snv
	6	139741793	A	G	0.216495	F0-657	edited_step	fix	upstream_gene_variant	MODIFIER	ENSSSCG00000050694	ENSSSCG00000050694	snv
	6	139860813	T	G	0.0909091	F0-657	edited_step	fix	intergenic_region	MODIFIER	ENSSSCG00000050694-ENSSSCG00000032901	ENSSSCG00000050694-ENSSSCG00000032901	snv
	6	139939014	G	C	0.448718	F0-657	edited_step	fix	intergenic_region	MODIFIER	ENSSSCG00000050694-ENSSSCG00000032901	ENSSSCG00000050694-ENSSSCG00000032901	snv
	6	140299953	G	T	0.243243	F0-657	edited_step	fix	intergenic_region	MODIFIER	ENSSSCG00000050694-ENSSSCG00000032901	ENSSSCG00000050694-ENSSSCG00000032901	snv
	6	140453312	G	T	0.579545	F0-657	edited_step	fix	intergenic_region	MODIFIER	ENSSSCG00000050694-ENSSSCG00000032901	ENSSSCG00000050694-ENSSSCG00000032901	snv
	6	142174984	A	G	0.521739	F0-657	edited_step	fix	intergenic_region	MODIFIER	PTGER3-ENSSSCG00000050303	ENSSSCG00000003788-ENSSSCG00000050303	snv
	6	147070661	C	G	0.548077	F0-657	edited_step	fix	intron_variant	MODIFIER	DNAJC6	ENSSSCG00000003807	snv
	6	149043596	T	G	0.00757576	F0-657	edited_step	fix	downstream_gene_variant	MODIFIER	ALG6	ENSSSCG00000003815	snv
	6	152141487	T	G	0.486486	F0-657	edited_step	fix	intergenic_region	MODIFIER	ENSSSCG00000042411-C1orf87	ENSSSCG00000042411-ENSSSCG00000003823	snv
	6	154252591	C	T	0.00699301	F0-657	isolation_step	fix	intron_variant	MODIFIER	ENSSSCG00000041035	ENSSSCG00000041035	snv
	6	154653961	T	C	0.504348	F0-657	edited_step	fix	intron_variant	MODIFIER	ENSSSCG00000041035	ENSSSCG00000041035	snv
	6	156814610	T	G	0.451613	F0-657	nuclear_transfor_step	fix	upstream_gene_variant	MODIFIER	ENSSSCG00000050983	ENSSSCG00000050983	snv
	6	161813669	T	G	0.451128	F0-657	nuclear_transfor_step	fix	intron_variant	MODIFIER	ELAVL4	ENSSSCG00000037291	snv
	6	162061064	C	A	0.0149254	F0-657	edited_step	fix	intron_variant	MODIFIER	AGBL4	ENSSSCG00000031300	snv
	6	163248028	G	A	0.489796	F0-657	edited_step	fix	intergenic_region	MODIFIER	AGBL4-SPATA6	ENSSSCG00000031300-ENSSSCG00000003881	snv
	6	163269469	A	C	0.479167	F0-657	edited_step	fix	intergenic_region	MODIFIER	AGBL4-SPATA6	ENSSSCG00000031300-ENSSSCG00000003881	snv
	6	164104007	G	A	0.555556	F0-657	edited_step	fix	intergenic_region	MODIFIER	ENSSSCG00000035459-FOXD2	ENSSSCG00000035459-ENSSSCG00000034880	snv
	6	170525332	C	T	0.58209	F0-657	edited_step	fix	intron_variant	MODIFIER	RIMS3	ENSSSCG00000039245	snv
	7	7276658	A	C	0.523077	F0-657	edited_step	fix	intergenic_region	MODIFIER	TFAP2A-GCNT2	ENSSSCG00000001036-ENSSSCG00000033009	snv
	7	8862914	G	A	0.429907	F0-657	edited_step	fix	intergenic_region	MODIFIER	ENSSSCG00000045887-ENSSSCG00000048941	ENSSSCG00000045887-ENSSSCG00000048941	snv
	7	10017492	T	C	0.44697	F0-657	nuclear_transfor_step	fix	intron_variant	MODIFIER	RANBP9	ENSSSCG00000001056	snv
	7	17307289	A	G	0.443396	F0-657	edited_step	fix	intron_variant	MODIFIER	ENSSSCG00000049691	ENSSSCG00000049691	snv
	7	17828528	T	C	0.461538	F0-657	edited_step	fix	intergenic_region	MODIFIER	ENSSSCG00000050980-ENSSSCG00000046227	ENSSSCG00000050980-ENSSSCG00000046227	snv
	7	18672007	T	C	0.402299	F0-657	edited_step	fix	downstream_gene_variant	MODIFIER	ENSSSCG00000043634	ENSSSCG00000043634	snv
	7	18948035	T	C	0.512821	F0-657	edited_step	fix	intergenic_region	MODIFIER	SNORA70-NRSN1	ENSSSCG00000026343-ENSSSCG00000021696	snv
	7	20164987	A	C	0.458716	F0-657	edited_step	fix	intron_variant	MODIFIER	CARMIL1	ENSSSCG00000001100	snv
	7	22078361	G	C	0.454545	F0-657	edited_step	fix	upstream_gene_variant	MODIFIER	ZSCAN9	ENSSSCG00000001203	snv
	7	25773508	C	A	0.5	F0-657	edited_step	fix	intron_variant	MODIFIER	HMGCLL1	ENSSSCG00000001479	snv
	7	26205060	G	C	0.404255	F0-657	edited_step	fix	intergenic_region	MODIFIER	FAM83B-TINAG	ENSSSCG00000001483-ENSSSCG00000001484	snv
	7	28244886	G	A	0.552381	F0-657	nuclear_transfor_step	fix	intergenic_region	MODIFIER	ENSSSCG00000046478-PRIM2	ENSSSCG00000046478-ENSSSCG00000001493	snv
	7	30252875	C	A	0.0106383	F0-657	edited_step	fix	intron_variant	MODIFIER	GRM4	ENSSSCG00000001523	snv
	7	31080730	G	T	0.117188	F0-657	edited_step	fix	intron_variant	MODIFIER	TCP11	ENSSSCG00000001535	snv
	7	39281344	C	A	0.519231	F0-657	edited_step	fix	intron_variant	MODIFIER	TCTE1	ENSSSCG00000001705	snv
	7	42670691	C	A	0.383721	F0-657	edited_step	fix	intron_variant	MODIFIER	PTCHD4	ENSSSCG00000001729	snv
	7	43234999	C	A	0.545455	F0-657	edited_step	fix	intron_variant	MODIFIER	ENSSSCG00000049265	ENSSSCG00000049265	snv
	7	43301220	T	G	0.127451	F0-657	edited_step	fix	upstream_gene_variant	MODIFIER	ENSSSCG00000049265	ENSSSCG00000049265	snv
	7	45796268	G	A	0.26087	F0-657	edited_step	fix	intron_variant	MODIFIER	PKHD1	ENSSSCG00000001746	snv
	7	46074330	G	A	0.463576	F0-657	nuclear_transfor_step	fix	intergenic_region	MODIFIER	IL17F-MCM3	ENSSSCG00000001749-ENSSSCG00000025488	snv
	7	48779998	G	T	0.564706	F0-657	edited_step	fix	intron_variant	MODIFIER	ENSSSCG00000038708	ENSSSCG00000038708	snv
	7	48818432	A	C	0.507812	F0-657	nuclear_transfor_step	fix	intron_variant	MODIFIER	ENSSSCG00000038708	ENSSSCG00000038708	snv
	7	51368582	A	G	0.394737	F0-657	edited_step	fix	upstream_gene_variant	MODIFIER	ADAMTSL3	ENSSSCG00000001793	snv
	7	59283656	C	A	0.553719	F0-657	nuclear_transfor_step	fix	intron_variant	MODIFIER	CCDC33	ENSSSCG00000001908	snv
	7	60035304	G	A	0.421053	F0-657	edited_step	fix	intron_variant	MODIFIER	HCN4	ENSSSCG00000001920	snv
	7	62897951	G	A	0.522222	F0-657	edited_step	fix	intron_variant	MODIFIER	SLC25A21	ENSSSCG00000039317	snv
	7	63508853	C	G	0.00854701	F0-657	isolation_step	fix	intergenic_region	MODIFIER	NKX2-1-ENSSSCG00000043128	ENSSSCG00000001945-ENSSSCG00000043128	snv
	7	64240982	A	T	0.39	F0-657	nuclear_transfor_step	fix	stop_gained	HIGH	RALGAPA1	ENSSSCG00000032377	snv
	7	64356443	A	T	0.459677	F0-657	nuclear_transfor_step	fix	intron_variant	MODIFIER	RALGAPA1	ENSSSCG00000032377	snv
	7	66398276	G	T	0.252525	F0-657	edited_step	fix	intron_variant	MODIFIER	NPAS3	ENSSSCG00000001964	snv
	7	67993930	C	G	0.5	F0-657	edited_step	fix	intron_variant	MODIFIER	NUBPL	ENSSSCG00000001968	snv
	7	71486372	A	G	0.242991	F0-657	edited_step	fix	intron_variant	MODIFIER	ENSSSCG00000044229	ENSSSCG00000044229	snv
	7	71535980	A	G	0.485149	F0-657	edited_step	fix	intergenic_region	MODIFIER	ENSSSCG00000044229-ENSSSCG00000046287	ENSSSCG00000044229-ENSSSCG00000046287	snv
	7	71939952	T	C	0.448	F0-657	nuclear_transfor_step	fix	intron_variant	MODIFIER	ENSSSCG00000045129	ENSSSCG00000045129	snv
	7	71995264	T	C	0.567164	F0-657	nuclear_transfor_step	fix	intergenic_region	MODIFIER	U6-U6	ENSSSCG00000038669-ENSSSCG00000028645	snv
	7	74056970	A	C	0.5	F0-657	edited_step	fix	upstream_gene_variant	MODIFIER	ENSSSCG00000042858	ENSSSCG00000042858	snv
	7	75505946	G	T	0.469388	F0-657	edited_step	fix	intergenic_region	MODIFIER	ENSSSCG00000044085-JPH4	ENSSSCG00000044085-ENSSSCG00000002014	snv
	7	77992383	A	G	0.535088	F0-657	edited_step	fix	upstream_gene_variant	MODIFIER	OR5AU1	ENSSSCG00000032876	snv
	7	79657967	C	T	0.242424	F0-657	edited_step	fix	downstream_gene_variant	MODIFIER	ENSSSCG00000049286	ENSSSCG00000049286	snv
	7	83828850	G	T	0.494737	F0-657	nuclear_transfor_step	fix	intergenic_region	MODIFIER	ENSSSCG00000042413-ENSSSCG00000034829	ENSSSCG00000042413-ENSSSCG00000034829	snv
	7	88164019	T	C	0.462963	F0-657	edited_step	fix	intron_variant	MODIFIER	ENSSSCG00000002259	ENSSSCG00000002259	snv
	7	91784055	G	A	0.484211	F0-657	nuclear_transfor_step	fix	intron_variant	MODIFIER	RAD51B	ENSSSCG00000028877	snv
	7	93680506	T	C	0.462687	F0-657	nuclear_transfor_step	fix	intron_variant	MODIFIER	SLC8A3	ENSSSCG00000002315	snv
	7	100281942	C	A	0.361446	F0-657	edited_step	fix	intron_variant	MODIFIER	TMEM63C	ENSSSCG00000002398	snv
	7	100994162	A	G	0.435185	F0-657	edited_step	fix	intergenic_region	MODIFIER	ADCK1-ENSSSCG00000045007	ENSSSCG00000002408-ENSSSCG00000045007	snv
	7	102013615	T	G	0.54386	F0-657	nuclear_transfor_step	fix	intron_variant	MODIFIER	NRXN3	ENSSSCG00000028942	snv
	7	102027418	C	A	0.489583	F0-657	edited_step	fix	intron_variant	MODIFIER	NRXN3	ENSSSCG00000028942	snv
	7	102147992	C	G	0.548077	F0-657	edited_step	fix	intron_variant	MODIFIER	NRXN3	ENSSSCG00000028942	snv
	7	102305158	T	A	0.442308	F0-657	edited_step	fix	intron_variant	MODIFIER	NRXN3	ENSSSCG00000028942	snv
	7	103589588	T	C	0.490196	F0-657	nuclear_transfor_step	fix	intron_variant	MODIFIER	CEP128	ENSSSCG00000002410	snv
	7	105543523	C	A	0.489933	F0-657	nuclear_transfor_step	fix	intergenic_region	MODIFIER	ENSSSCG00000047447-ENSSSCG00000047467	ENSSSCG00000047447-ENSSSCG00000047467	snv
	7	105571405	T	C	0.0138889	F0-657	isolation_step	fix	intergenic_region	MODIFIER	ENSSSCG00000047447-ENSSSCG00000047467	ENSSSCG00000047447-ENSSSCG00000047467	snv
	7	105940759	T	C	0.542373	F0-657	nuclear_transfor_step	fix	intergenic_region	MODIFIER	ENSSSCG00000045920-ENSSSCG00000043996	ENSSSCG00000045920-ENSSSCG00000043996	snv
	7	106008166	A	C	0.573171	F0-657	edited_step	fix	intergenic_region	MODIFIER	ENSSSCG00000045920-ENSSSCG00000043996	ENSSSCG00000045920-ENSSSCG00000043996	snv
	7	106370678	G	C	0.531532	F0-657	edited_step	fix	intergenic_region	MODIFIER	ENSSSCG00000043996-ENSSSCG00000044398	ENSSSCG00000043996-ENSSSCG00000044398	snv
	7	108507326	G	T	0.475	F0-657	nuclear_transfor_step	fix	intergenic_region	MODIFIER	ENSSSCG00000043565-ENSSSCG00000046538	ENSSSCG00000043565-ENSSSCG00000046538	snv
	7	108737367	C	T	0.0126582	F0-657	isolation_step	fix	intergenic_region	MODIFIER	ENSSSCG00000043565-ENSSSCG00000046538	ENSSSCG00000043565-ENSSSCG00000046538	snv
	7	109864404	A	C	0.569767	F0-657	edited_step	fix	intergenic_region	MODIFIER	ENSSSCG00000037928-GALC	ENSSSCG00000037928-ENSSSCG00000027865	snv
	7	110888776	G	T	0.467532	F0-657	edited_step	fix	intergenic_region	MODIFIER	U6-FOXN3	ENSSSCG00000020635-ENSSSCG00000002429	snv
	7	112399133	A	G	0.5	F0-657	edited_step	fix	synonymous_variant	LOW	TTC7B	ENSSSCG00000002436	snv
	7	114009712	C	T	0.468085	F0-657	nuclear_transfor_step	fix	3_prime_UTR_variant	MODIFIER	SLC24A4	ENSSSCG00000002450	snv
	7	115011858	T	A	0.440367	F0-657	edited_step	fix	intron_variant	MODIFIER	UNC79	ENSSSCG00000038851	snv
	7	115230899	T	C	0.459016	F0-657	nuclear_transfor_step	fix	intron_variant	MODIFIER	ASB2	ENSSSCG00000002467	snv
	7	115537095	G	A	0.45283	F0-657	nuclear_transfor_step	fix	intron_variant	MODIFIER	SERPINA6	ENSSSCG00000002475	snv
	7	115595850	G	A	0.536364	F0-657	nuclear_transfor_step	fix	intron_variant	MODIFIER	ENSSSCG00000038515	ENSSSCG00000038515	snv
	7	115614761	A	C	0.484211	F0-657	nuclear_transfor_step	fix	upstream_gene_variant	MODIFIER	ENSSSCG00000038515	ENSSSCG00000038515	snv
	7	119128301	C	A	0.0963855	F0-657	edited_step	fix	intergenic_region	MODIFIER	ENSSSCG00000044157-ENSSSCG00000041330	ENSSSCG00000044157-ENSSSCG00000041330	snv
	7	120589707	C	A	0.0352941	F0-657	edited_step	fix	intron_variant	MODIFIER	CCDC85C	ENSSSCG00000037284	snv
	8	305722	C	T	0.449275	F0-657	edited_step	fix	5_prime_UTR_variant	MODIFIER	TMEM175	ENSSSCG00000038234	snv
	8	312144	C	A	0.0769231	F0-657	edited_step	fix	downstream_gene_variant	MODIFIER	DGKQ	ENSSSCG00000027286	snv
	8	608265	C	T	0.1	F0-657	edited_step	fix	downstream_gene_variant	MODIFIER	NKX1-1	ENSSSCG00000038573	snv
	8	2357996	C	T	0.472727	F0-657	edited_step	fix	intergenic_region	MODIFIER	ADRA2C-HMX1	ENSSSCG00000008703-ENSSSCG00000008720	snv
	8	3815838	G	A	0.535714	F0-657	edited_step	fix	3_prime_UTR_variant	MODIFIER	TADA2B	ENSSSCG00000029624	snv
	8	7026434	A	T	0.0140845	F0-657	edited_step	fix	intergenic_region	MODIFIER	ENSSSCG00000043858-ENSSSCG00000046066	ENSSSCG00000043858-ENSSSCG00000046066	snv
	8	8448703	T	G	0.516949	F0-657	edited_step	fix	intergenic_region	MODIFIER	ENSSSCG00000039778-ENSSSCG00000035927	ENSSSCG00000039778-ENSSSCG00000035927	snv
	8	8665686	A	G	0.359223	F0-657	nuclear_transfor_step	fix	intergenic_region	MODIFIER	ENSSSCG00000035927-ENSSSCG00000046467	ENSSSCG00000035927-ENSSSCG00000046467	snv
	8	13260324	G	T	0.383721	F0-657	edited_step	fix	3_prime_UTR_variant	MODIFIER	ENSSSCG00000045672	ENSSSCG00000045672	snv
	8	14561281	T	G	0.544218	F0-657	nuclear_transfor_step	fix	intergenic_region	MODIFIER	ENSSSCG00000047197-SLIT2	ENSSSCG00000047197-ENSSSCG00000008749	snv
	8	15175525	A	C	0.448598	F0-657	edited_step	fix	intergenic_region	MODIFIER	SLIT2-PACRGL	ENSSSCG00000008749-ENSSSCG00000008750	snv
	8	17111565	T	A	0.5	F0-657	nuclear_transfor_step	fix	intron_variant	MODIFIER	GBA3	ENSSSCG00000008754	snv
	8	17918114	A	G	0.528455	F0-657	edited_step	fix	intron_variant	MODIFIER	PPARGC1A	ENSSSCG00000029275	snv
	8	18889000	T	C	0.522222	F0-657	nuclear_transfor_step	fix	intron_variant	MODIFIER	CCDC149	ENSSSCG00000023001	snv
	8	20025053	C	A	0.491525	F0-657	nuclear_transfor_step	fix	intron_variant	MODIFIER	RBPJ	ENSSSCG00000022155	snv
	8	20937982	G	C	0.444444	F0-657	nuclear_transfor_step	fix	intergenic_region	MODIFIER	ENSSSCG00000051729-ENSSSCG00000045684	ENSSSCG00000051729-ENSSSCG00000045684	snv
	8	21055553	A	C	0.00840336	F0-657	edited_step	fix	intergenic_region	MODIFIER	ENSSSCG00000051729-ENSSSCG00000045684	ENSSSCG00000051729-ENSSSCG00000045684	snv
	8	21055584	T	C	0.451327	F0-657	nuclear_transfor_step	fix	intergenic_region	MODIFIER	ENSSSCG00000051729-ENSSSCG00000045684	ENSSSCG00000051729-ENSSSCG00000045684	snv
	8	21232511	T	C	0.166667	F0-657	edited_step	fix	intergenic_region	MODIFIER	ENSSSCG00000051729-ENSSSCG00000045684	ENSSSCG00000051729-ENSSSCG00000045684	snv
	8	22889143	A	C	0.5625	F0-657	nuclear_transfor_step	fix	intergenic_region	MODIFIER	ENSSSCG00000045318-ENSSSCG00000051649	ENSSSCG00000045318-ENSSSCG00000051649	snv
	8	23554544	G	T	0.495327	F0-657	nuclear_transfor_step	fix	intron_variant	MODIFIER	PCDH7	ENSSSCG00000008765	snv
	8	24762778	C	A	0.518072	F0-657	nuclear_transfor_step	fix	intergenic_region	MODIFIER	PCDH7-ENSSSCG00000008767	ENSSSCG00000008765-ENSSSCG00000008767	snv
	8	26031861	T	G	0.594059	F0-657	edited_step	fix	intergenic_region	MODIFIER	PCDH7-ENSSSCG00000008767	ENSSSCG00000008765-ENSSSCG00000008767	snv
	8	26765333	A	T	0.454545	F0-657	nuclear_transfor_step	fix	intergenic_region	MODIFIER	PCDH7-ENSSSCG00000008767	ENSSSCG00000008765-ENSSSCG00000008767	snv
	8	26919652	C	T	0.232143	F0-657	edited_step	fix	non_coding_transcript_exon_variant	MODIFIER	ENSSSCG00000045669	ENSSSCG00000045669	snv
	8	27744721	A	G	0.00862069	F0-657	isolation_step	fix	intergenic_region	MODIFIER	ENSSSCG00000050356-ARAP2	ENSSSCG00000050356-ENSSSCG00000008768	snv
	8	27746069	A	C	0.515152	F0-657	edited_step	fix	intergenic_region	MODIFIER	ENSSSCG00000050356-ARAP2	ENSSSCG00000050356-ENSSSCG00000008768	snv
	8	30182771	G	T	0.0701754	F0-657	edited_step	fix	upstream_gene_variant	MODIFIER	TLR6	ENSSSCG00000026592	snv
	8	31143407	G	C	0.447917	F0-657	nuclear_transfor_step	fix	intergenic_region	MODIFIER	PDS5A-N4BP2	ENSSSCG00000023112-ENSSSCG00000008792	snv
	8	32592459	G	A	0.395604	F0-657	edited_step	fix	intron_variant	MODIFIER	LIMCH1	ENSSSCG00000008799	snv
	8	32613384	A	C	0.402597	F0-657	edited_step	fix	intron_variant	MODIFIER	LIMCH1	ENSSSCG00000008799	snv
	8	33235787	A	G	0.405063	F0-657	edited_step	fix	intergenic_region	MODIFIER	BEND4-U6	ENSSSCG00000008802-ENSSSCG00000019351	snv
	8	33434804	A	G	0.456311	F0-657	edited_step	fix	intron_variant	MODIFIER	ATP8A1	ENSSSCG00000008803	snv
	8	33435050	C	G	0.674419	F0-657	edited_step	fix	intron_variant	MODIFIER	ATP8A1	ENSSSCG00000008803	snv
	8	34192285	A	C	0.026087	F0-657	isolation_step	fix	intergenic_region	MODIFIER	ENSSSCG00000037522-KCTD8	ENSSSCG00000037522-ENSSSCG00000035712	snv
	8	34372925	G	A	0.207921	F0-657	edited_step	fix	intergenic_region	MODIFIER	ENSSSCG00000037522-KCTD8	ENSSSCG00000037522-ENSSSCG00000035712	snv
	8	35973919	T	G	0.507246	F0-657	edited_step	fix	intergenic_region	MODIFIER	ENSSSCG00000049434-GABRG1	ENSSSCG00000049434-ENSSSCG00000008809	snv
	8	36666463	T	C	0.481818	F0-657	edited_step	fix	intergenic_region	MODIFIER	GABRA2-U6	ENSSSCG00000028922-ENSSSCG00000018534	snv
	8	41372327	G	T	0.256637	F0-657	edited_step	fix	intergenic_region	MODIFIER	Metazoa_SRP-KIT	ENSSSCG00000023774-ENSSSCG00000008842	snv
	8	44063901	A	G	0.0555556	F0-657	edited_step	fix	intron_variant	MODIFIER	ENSSSCG00000045736	ENSSSCG00000045736	snv
	8	46278155	A	G	0.00819672	F0-657	edited_step	fix	intergenic_region	MODIFIER	GRIA2-ENSSSCG00000042685	ENSSSCG00000024685-ENSSSCG00000042685	snv
	8	48572811	T	C	0.470588	F0-657	edited_step	fix	intergenic_region	MODIFIER	ENSSSCG00000042238-U6	ENSSSCG00000042238-ENSSSCG00000020037	snv
	8	49000139	C	A	0.416667	F0-657	edited_step	fix	intergenic_region	MODIFIER	ENSSSCG00000042238-U6	ENSSSCG00000042238-ENSSSCG00000020037	snv
	8	49363439	G	C	0.28866	F0-657	edited_step	fix	intergenic_region	MODIFIER	ENSSSCG00000042238-U6	ENSSSCG00000042238-ENSSSCG00000020037	snv
	8	49414815	C	A	0.554217	F0-657	edited_step	fix	intergenic_region	MODIFIER	ENSSSCG00000042238-U6	ENSSSCG00000042238-ENSSSCG00000020037	snv
	8	49479704	A	G	0.0737705	F0-657	edited_step	fix	intergenic_region	MODIFIER	ENSSSCG00000042238-U6	ENSSSCG00000042238-ENSSSCG00000020037	snv
	8	49586377	G	C	0.483333	F0-657	nuclear_transfor_step	fix	intergenic_region	MODIFIER	ENSSSCG00000042238-U6	ENSSSCG00000042238-ENSSSCG00000020037	snv
	8	49756619	G	C	0.272727	F0-657	edited_step	fix	intergenic_region	MODIFIER	ENSSSCG00000042238-U6	ENSSSCG00000042238-ENSSSCG00000020037	snv
	8	49927227	G	A	0.489362	F0-657	edited_step	fix	intergenic_region	MODIFIER	ENSSSCG00000042238-U6	ENSSSCG00000042238-ENSSSCG00000020037	snv
	8	50739848	A	G	0.388889	F0-657	edited_step	fix	intron_variant	MODIFIER	FSTL5	ENSSSCG00000027183	snv
	8	54225004	T	A	0.462366	F0-657	edited_step	fix	intergenic_region	MODIFIER	ENSSSCG00000047744-ENSSSCG00000035975	ENSSSCG00000047744-ENSSSCG00000035975	snv
	8	54582903	A	G	0.487179	F0-657	edited_step	fix	intergenic_region	MODIFIER	ENSSSCG00000035975-ENSSSCG00000032892	ENSSSCG00000035975-ENSSSCG00000032892	snv
	8	58282513	C	G	0.409639	F0-657	nuclear_transfor_step	fix	intergenic_region	MODIFIER	ENSSSCG00000043708-ENSSSCG00000049845	ENSSSCG00000043708-ENSSSCG00000049845	snv
	8	58575627	A	G	0.510638	F0-657	edited_step	fix	upstream_gene_variant	MODIFIER	ENSSSCG00000048506	ENSSSCG00000048506	snv
	8	59011400	G	A	0.511111	F0-657	edited_step	fix	intergenic_region	MODIFIER	ENSSSCG00000049794-ENSSSCG00000046730	ENSSSCG00000049794-ENSSSCG00000046730	snv
	8	59316067	C	A	0.531532	F0-657	nuclear_transfor_step	fix	intergenic_region	MODIFIER	ENSSSCG00000046730-ENSSSCG00000046907	ENSSSCG00000046730-ENSSSCG00000046907	snv
	8	59734863	G	T	0.00934579	F0-657	isolation_step	fix	intergenic_region	MODIFIER	ENSSSCG00000046907-ENSSSCG00000048043	ENSSSCG00000046907-ENSSSCG00000048043	snv
	8	59787542	C	A	0.45977	F0-657	edited_step	fix	intergenic_region	MODIFIER	ENSSSCG00000046907-ENSSSCG00000048043	ENSSSCG00000046907-ENSSSCG00000048043	snv
	8	60042219	C	A	0.630435	F0-657	edited_step	fix	intergenic_region	MODIFIER	ENSSSCG00000046907-ENSSSCG00000048043	ENSSSCG00000046907-ENSSSCG00000048043	snv
	8	61438240	T	C	0.008	F0-657	edited_step	fix	intergenic_region	MODIFIER	ENSSSCG00000031193-ENSSSCG00000047276	ENSSSCG00000031193-ENSSSCG00000047276	snv
	8	62044701	G	T	0.571429	F0-657	edited_step	fix	intergenic_region	MODIFIER	ENSSSCG00000047276-TECRL	ENSSSCG00000047276-ENSSSCG00000024681	snv
	8	62931017	T	C	0.454545	F0-657	edited_step	fix	intergenic_region	MODIFIER	TECRL-ENSSSCG00000041794	ENSSSCG00000024681-ENSSSCG00000041794	snv
	8	63167787	G	T	0.526316	F0-657	edited_step	fix	intergenic_region	MODIFIER	TECRL-ENSSSCG00000041794	ENSSSCG00000024681-ENSSSCG00000041794	snv
	8	63441443	A	C	0.00980392	F0-657	edited_step	fix	intron_variant	MODIFIER	EPHA5	ENSSSCG00000008919	snv
	8	63682787	C	A	0.00943396	F0-657	isolation_step	fix	intergenic_region	MODIFIER	EPHA5-ENSSSCG00000049899	ENSSSCG00000008919-ENSSSCG00000049899	snv
	8	63706062	T	G	0.434426	F0-657	nuclear_transfor_step	fix	intergenic_region	MODIFIER	EPHA5-ENSSSCG00000049899	ENSSSCG00000008919-ENSSSCG00000049899	snv
	8	63940688	C	A	0.511811	F0-657	nuclear_transfor_step	fix	intergenic_region	MODIFIER	EPHA5-ENSSSCG00000049899	ENSSSCG00000008919-ENSSSCG00000049899	snv
	8	64236679	A	T	0.0186916	F0-657	edited_step	fix	intergenic_region	MODIFIER	ENSSSCG00000049899-ENSSSCG00000041381	ENSSSCG00000049899-ENSSSCG00000041381	snv
	8	64411113	G	C	0.468254	F0-657	nuclear_transfor_step	fix	intergenic_region	MODIFIER	ENSSSCG00000049899-ENSSSCG00000041381	ENSSSCG00000049899-ENSSSCG00000041381	snv
	8	66575696	G	A	0.0107527	F0-657	edited_step	fix	splice_region_variant&intron_variant	LOW	ENSSSCG00000022724	ENSSSCG00000022724	snv
	8	66772612	A	G	0.0102041	F0-657	edited_step	fix	intron_variant	MODIFIER	ENSSSCG00000039518	ENSSSCG00000039518	snv
	8	69654423	A	C	0.0102041	F0-657	isolation_step	fix	intron_variant	MODIFIER	ALB	ENSSSCG00000008948	snv
	8	70340345	T	G	0.494737	F0-657	edited_step	fix	intergenic_region	MODIFIER	MTHFD2L-EREG	ENSSSCG00000008961-ENSSSCG00000038185	snv
	8	71959908	G	T	0.428571	F0-657	nuclear_transfor_step	fix	intron_variant	MODIFIER	ENSSSCG00000008981	ENSSSCG00000008981	snv
	8	72229631	G	A	0.390909	F0-657	edited_step	fix	intergenic_region	MODIFIER	CCDC158-ENSSSCG00000041895	ENSSSCG00000008983-ENSSSCG00000041895	snv
	8	73177050	G	A	0.470588	F0-657	edited_step	fix	intergenic_region	MODIFIER	ENSSSCG00000049617-CNOT6L	ENSSSCG00000049617-ENSSSCG00000008989	snv
	8	76284180	A	T	0.514706	F0-657	nuclear_transfor_step	fix	downstream_gene_variant	MODIFIER	TIGD4	ENSSSCG00000038186	snv
	8	76515356	C	G	0.0138889	F0-657	isolation_step	fix	intron_variant	MODIFIER	FBXW7	ENSSSCG00000020879	snv
	8	76515549	C	T	0.0128205	F0-657	isolation_step	fix	intron_variant	MODIFIER	FBXW7	ENSSSCG00000020879	snv
	8	78151396	A	C	0.453782	F0-657	edited_step	fix	intron_variant	MODIFIER	LRBA	ENSSSCG00000009021	snv
	8	79379161	A	G	0.457143	F0-657	edited_step	fix	intron_variant	MODIFIER	IQCM	ENSSSCG00000035623	snv
	8	81445897	C	T	0.484127	F0-657	edited_step	fix	intergenic_region	MODIFIER	EDNRA-ENSSSCG00000043971	ENSSSCG00000009031-ENSSSCG00000043971	snv
	8	84441052	T	G	0.410853	F0-657	nuclear_transfor_step	fix	intergenic_region	MODIFIER	ENSSSCG00000045723-ENSSSCG00000040293	ENSSSCG00000045723-ENSSSCG00000040293	snv
	8	84894300	A	G	0.465116	F0-657	edited_step	fix	intron_variant	MODIFIER	INPP4B	ENSSSCG00000009050	snv
	8	84903208	G	T	0.443396	F0-657	edited_step	fix	intron_variant	MODIFIER	INPP4B	ENSSSCG00000009050	snv
	8	88618389	C	G	0.462264	F0-657	edited_step	fix	intron_variant	MODIFIER	SLC7A11	ENSSSCG00000022649	snv
	8	88690322	A	G	0.546218	F0-657	edited_step	fix	downstream_gene_variant	MODIFIER	SLC7A11	ENSSSCG00000022649	snv
	8	89648574	A	G	0.433628	F0-657	edited_step	fix	intron_variant	MODIFIER	ENSSSCG00000041329	ENSSSCG00000041329	snv
	8	90343043	C	G	0.490196	F0-657	edited_step	fix	intergenic_region	MODIFIER	ENSSSCG00000043227-ENSSSCG00000051283	ENSSSCG00000043227-ENSSSCG00000051283	snv
	8	90979866	G	T	0.530864	F0-657	edited_step	fix	intergenic_region	MODIFIER	ENSSSCG00000050034-PABPC4L	ENSSSCG00000050034-ENSSSCG00000009067	snv
	8	92401677	A	G	0.563107	F0-657	edited_step	fix	intergenic_region	MODIFIER	PABPC4L-PCDH10	ENSSSCG00000009067-ENSSSCG00000036125	snv
	8	93290013	G	A	0.504505	F0-657	nuclear_transfor_step	fix	intergenic_region	MODIFIER	ENSSSCG00000042175-ENSSSCG00000049834	ENSSSCG00000042175-ENSSSCG00000049834	snv
	8	93516032	A	C	0.534653	F0-657	edited_step	fix	intergenic_region	MODIFIER	ENSSSCG00000042175-ENSSSCG00000049834	ENSSSCG00000042175-ENSSSCG00000049834	snv
	8	93644240	T	G	0.45122	F0-657	nuclear_transfor_step	fix	intergenic_region	MODIFIER	ENSSSCG00000042175-ENSSSCG00000049834	ENSSSCG00000042175-ENSSSCG00000049834	snv
	8	93895681	C	A	0.417391	F0-657	edited_step	fix	intergenic_region	MODIFIER	ENSSSCG00000042175-ENSSSCG00000049834	ENSSSCG00000042175-ENSSSCG00000049834	snv
	8	94639538	A	G	0.553571	F0-657	edited_step	fix	intergenic_region	MODIFIER	ENSSSCG00000048109-ENSSSCG00000042298	ENSSSCG00000048109-ENSSSCG00000042298	snv
	8	99013500	T	C	0.5	F0-657	nuclear_transfor_step	fix	intron_variant	MODIFIER	ENSSSCG00000045594	ENSSSCG00000045594	snv
	8	100266978	A	C	0.0206186	F0-657	edited_step	fix	intergenic_region	MODIFIER	ENSSSCG00000046065-SPRY1	ENSSSCG00000046065-ENSSSCG00000009083	snv
	8	103448365	G	A	0.528926	F0-657	nuclear_transfor_step	fix	intergenic_region	MODIFIER	PRDM5-ENSSSCG00000049812	ENSSSCG00000009101-ENSSSCG00000049812	snv
	8	104159657	C	T	0.428571	F0-657	edited_step	fix	non_coding_transcript_exon_variant	MODIFIER	ENSSSCG00000043231	ENSSSCG00000043231	snv
	8	105394462	A	T	0.495575	F0-657	edited_step	fix	intergenic_region	MODIFIER	NDST3-ENSSSCG00000048550	ENSSSCG00000009115-ENSSSCG00000048550	snv
	8	106429688	T	G	0.138889	F0-657	edited_step	fix	intergenic_region	MODIFIER	ENSSSCG00000036158-ENSSSCG00000051270	ENSSSCG00000036158-ENSSSCG00000051270	snv
	8	106542582	A	C	0.468254	F0-657	nuclear_transfor_step	fix	intergenic_region	MODIFIER	ENSSSCG00000036158-ENSSSCG00000051270	ENSSSCG00000036158-ENSSSCG00000051270	snv
	8	107023816	A	G	0.483146	F0-657	edited_step	fix	intergenic_region	MODIFIER	ENSSSCG00000042559-ENSSSCG00000049275	ENSSSCG00000042559-ENSSSCG00000049275	snv
	8	107880229	C	G	0.53125	F0-657	edited_step	fix	intergenic_region	MODIFIER	ENSSSCG00000041297-NDST4	ENSSSCG00000041297-ENSSSCG00000033834	snv
	8	111361528	A	C	0.461538	F0-657	edited_step	fix	intergenic_region	MODIFIER	ENSSSCG00000043913-ENSSSCG00000048102	ENSSSCG00000043913-ENSSSCG00000048102	snv
	8	113365017	G	C	0.09	F0-657	edited_step	fix	intron_variant	MODIFIER	ETNPPL	ENSSSCG00000009144	snv
	8	116182123	T	C	0.521127	F0-657	nuclear_transfor_step	fix	intron_variant	MODIFIER	ARHGEF38	ENSSSCG00000021764	snv
	8	123176720	A	G	0.241758	F0-657	edited_step	fix	intergenic_region	MODIFIER	ENSSSCG00000039281-ENSSSCG00000048784	ENSSSCG00000039281-ENSSSCG00000048784	snv
	8	124233220	A	G	0.52439	F0-657	edited_step	fix	intron_variant	MODIFIER	UNC5C	ENSSSCG00000021874	snv
	8	125888277	A	G	0.0210526	F0-657	edited_step	fix	intron_variant	MODIFIER	GRID2	ENSSSCG00000009197	snv
	8	126211714	T	G	0.382022	F0-657	edited_step	fix	intron_variant	MODIFIER	GRID2	ENSSSCG00000009197	snv
	8	126944950	G	T	0.444444	F0-657	edited_step	fix	intergenic_region	MODIFIER	ENSSSCG00000041292-ENSSSCG00000048161	ENSSSCG00000041292-ENSSSCG00000048161	snv
	8	127115664	G	A	0.0731707	F0-657	edited_step	fix	intergenic_region	MODIFIER	ENSSSCG00000041292-ENSSSCG00000048161	ENSSSCG00000041292-ENSSSCG00000048161	snv
	8	128604514	T	G	0.545455	F0-657	nuclear_transfor_step	fix	intron_variant	MODIFIER	CCSER1	ENSSSCG00000022986	snv
	8	128657808	C	T	0.455357	F0-657	nuclear_transfor_step	fix	intron_variant	MODIFIER	CCSER1	ENSSSCG00000022986	snv
	8	128825411	A	G	0.513043	F0-657	edited_step	fix	intron_variant	MODIFIER	CCSER1	ENSSSCG00000022986	snv
	8	129300199	T	A	0.531746	F0-657	nuclear_transfor_step	fix	intron_variant	MODIFIER	SNCA	ENSSSCG00000009203	snv
	8	134338783	T	G	0.525547	F0-657	nuclear_transfor_step	fix	intergenic_region	MODIFIER	ENSSSCG00000047937-ENSSSCG00000051072	ENSSSCG00000047937-ENSSSCG00000051072	snv
	8	134701242	C	T	0.542857	F0-657	edited_step	fix	intergenic_region	MODIFIER	ENSSSCG00000042957-ENSSSCG00000041853	ENSSSCG00000042957-ENSSSCG00000041853	snv
	9	846225	C	T	0.365854	F0-657	edited_step	fix	intron_variant	MODIFIER	STK33	ENSSSCG00000030206	snv
	9	5718172	C	A	0.528302	F0-657	edited_step	fix	intergenic_region	MODIFIER	ENSSSCG00000033239-ENSSSCG00000041696	ENSSSCG00000033239-ENSSSCG00000041696	snv
	9	6371822	T	G	0.0357143	F0-657	edited_step	fix	intron_variant	MODIFIER	NUP98	ENSSSCG00000014794	snv
	9	10097012	C	T	0.495652	F0-657	nuclear_transfor_step	fix	intron_variant	MODIFIER	UVRAG	ENSSSCG00000028979	snv
	9	11531349	A	C	0.641509	F0-657	edited_step	fix	intron_variant	MODIFIER	MYO7A	ENSSSCG00000014876	snv
	9	13313353	G	T	0.529412	F0-657	nuclear_transfor_step	fix	intergenic_region	MODIFIER	ENSSSCG00000014894-ENSSSCG00000044510	ENSSSCG00000014894-ENSSSCG00000044510	snv
	9	13817099	C	T	0.435897	F0-657	nuclear_transfor_step	fix	intergenic_region	MODIFIER	ssc-mir-708-ENSSSCG00000049595	ENSSSCG00000019199-ENSSSCG00000049595	snv
	9	14598058	G	T	0.557692	F0-657	edited_step	fix	intergenic_region	MODIFIER	ENSSSCG00000043699-ENSSSCG00000043680	ENSSSCG00000043699-ENSSSCG00000043680	snv
	9	15793053	C	G	0.621053	F0-657	edited_step	fix	intron_variant	MODIFIER	ENSSSCG00000045408	ENSSSCG00000045408	snv
	9	16016287	A	C	0.55102	F0-657	edited_step	fix	intergenic_region	MODIFIER	ENSSSCG00000045408-ENSSSCG00000042094	ENSSSCG00000045408-ENSSSCG00000042094	snv
	9	16897051	G	A	0.464286	F0-657	nuclear_transfor_step	fix	intergenic_region	MODIFIER	U2-FAM181B	ENSSSCG00000024491-ENSSSCG00000014897	snv
	9	18236342	G	T	0.0689655	F0-657	edited_step	fix	intron_variant	MODIFIER	DLG2	ENSSSCG00000014904	snv
	9	18468422	G	A	0.5	F0-657	edited_step	fix	intron_variant	MODIFIER	DLG2	ENSSSCG00000014904	snv
	9	19098172	A	G	0.464912	F0-657	nuclear_transfor_step	fix	intron_variant	MODIFIER	DLG2	ENSSSCG00000014904	snv
	9	20302921	C	T	0.364865	F0-657	edited_step	fix	intron_variant	MODIFIER	FZD4	ENSSSCG00000014920	snv
	9	21891026	C	G	0.57265	F0-657	nuclear_transfor_step	fix	intergenic_region	MODIFIER	ENSSSCG00000049974-GRM5	ENSSSCG00000049974-ENSSSCG00000029865	snv
	9	22019134	T	G	0.472441	F0-657	nuclear_transfor_step	fix	intron_variant	MODIFIER	GRM5	ENSSSCG00000029865	snv
	9	22413180	G	T	0.474576	F0-657	nuclear_transfor_step	fix	intron_variant	MODIFIER	GRM5	ENSSSCG00000029865	snv
	9	24165489	C	A	0.608696	F0-657	nuclear_transfor_step	fix	intergenic_region	MODIFIER	ENSSSCG00000045812-ENSSSCG00000041757	ENSSSCG00000045812-ENSSSCG00000041757	snv
	9	24976887	C	A	0.222222	F0-657	edited_step	fix	intergenic_region	MODIFIER	ENSSSCG00000045215-ENSSSCG00000014935	ENSSSCG00000045215-ENSSSCG00000014935	snv
	9	27695264	G	T	0.454545	F0-657	edited_step	fix	intergenic_region	MODIFIER	ENSSSCG00000045779-FAM76B	ENSSSCG00000045779-ENSSSCG00000014967	snv
	9	29290372	A	C	0.44898	F0-657	edited_step	fix	downstream_gene_variant	MODIFIER	U6	ENSSSCG00000020347	snv
	9	29514846	A	C	0.00952381	F0-657	edited_step	fix	upstream_gene_variant	MODIFIER	ENSSSCG00000048478	ENSSSCG00000048478	snv
	9	30198594	G	T	0.592233	F0-657	nuclear_transfor_step	fix	intergenic_region	MODIFIER	ENSSSCG00000033271-ENSSSCG00000043295	ENSSSCG00000033271-ENSSSCG00000043295	snv
	9	30619072	A	C	0.508197	F0-657	edited_step	fix	intergenic_region	MODIFIER	ENSSSCG00000045634-CNTN5	ENSSSCG00000045634-ENSSSCG00000014975	snv
	9	35018930	A	G	0.522124	F0-657	edited_step	fix	intergenic_region	MODIFIER	ENSSSCG00000044003-ENSSSCG00000032358	ENSSSCG00000044003-ENSSSCG00000032358	snv
	9	40293489	G	T	0.245614	F0-657	edited_step	fix	intergenic_region	MODIFIER	ENSSSCG00000045509-ENSSSCG00000048975	ENSSSCG00000045509-ENSSSCG00000048975	snv
	9	42910571	G	A	0.545455	F0-657	edited_step	fix	intron_variant	MODIFIER	CADM1	ENSSSCG00000031831	snv
	9	48505853	G	C	0.479339	F0-657	nuclear_transfor_step	fix	upstream_gene_variant	MODIFIER	SORL1	ENSSSCG00000015135	snv
	9	49224863	C	A	0.0225564	F0-657	isolation_step	fix	intron_variant	MODIFIER	ENSSSCG00000050772	ENSSSCG00000050772	snv
	9	51603008	A	G	0.560345	F0-657	edited_step	fix	intron_variant	MODIFIER	ENSSSCG00000015193	ENSSSCG00000015193	snv
	9	53652151	G	A	0.464286	F0-657	nuclear_transfor_step	fix	intron_variant	MODIFIER	KIRREL3	ENSSSCG00000015234	snv
	9	53949721	C	T	0.464912	F0-657	nuclear_transfor_step	fix	intron_variant	MODIFIER	KIRREL3	ENSSSCG00000015234	snv
	9	54731661	G	A	0.5	F0-657	nuclear_transfor_step	fix	intergenic_region	MODIFIER	ENSSSCG00000044962-ENSSSCG00000044173	ENSSSCG00000044962-ENSSSCG00000044173	snv
	9	55158577	C	G	0.512821	F0-657	nuclear_transfor_step	fix	intergenic_region	MODIFIER	ENSSSCG00000048184-ENSSSCG00000042181	ENSSSCG00000048184-ENSSSCG00000042181	snv
	9	55535064	G	T	0.5	F0-657	edited_step	fix	intron_variant	MODIFIER	ENSSSCG00000044678	ENSSSCG00000044678	snv
	9	59240949	A	T	0.0631579	F0-657	edited_step	fix	intron_variant	MODIFIER	OPCML	ENSSSCG00000037534	snv
	9	60639734	T	G	0.340909	F0-657	edited_step	fix	intron_variant	MODIFIER	JAM3	ENSSSCG00000015256	snv
	9	61984828	T	A	0.47561	F0-657	edited_step	fix	intergenic_region	MODIFIER	ENSSSCG00000051307-GUCY1A2	ENSSSCG00000051307-ENSSSCG00000024613	snv
	9	65200503	G	T	0.201754	F0-657	edited_step	fix	3_prime_UTR_variant	MODIFIER	MDM4	ENSSSCG00000015284	snv
	9	65586582	A	G	0.0212766	F0-657	edited_step	fix	intron_variant	MODIFIER	NFASC	ENSSSCG00000022951	snv
	9	65634891	C	A	0.556962	F0-657	edited_step	fix	intron_variant	MODIFIER	NFASC	ENSSSCG00000022951	snv
	9	75638348	A	C	0.457627	F0-657	nuclear_transfor_step	fix	intron_variant	MODIFIER	DYNC1I1	ENSSSCG00000015335	snv
	9	77011781	G	A	0.476744	F0-657	edited_step	fix	intergenic_region	MODIFIER	ENSSSCG00000023850-TAC1	ENSSSCG00000023850-ENSSSCG00000023592	snv
	9	78305728	T	A	0.597561	F0-657	edited_step	fix	intron_variant	MODIFIER	GLCCI1	ENSSSCG00000015345	snv
	9	78362589	G	A	0.54878	F0-657	edited_step	fix	downstream_gene_variant	MODIFIER	ICA1	ENSSSCG00000015346	snv
	9	78743987	T	C	0.347826	F0-657	edited_step	fix	intron_variant	MODIFIER	NXPH1	ENSSSCG00000037207	snv
	9	78923365	A	C	0.0144928	F0-657	edited_step	fix	upstream_gene_variant	MODIFIER	ENSSSCG00000046900	ENSSSCG00000046900	snv
	9	79916651	T	A	0.408163	F0-657	edited_step	fix	intergenic_region	MODIFIER	ENSSSCG00000051507-ENSSSCG00000051543	ENSSSCG00000051507-ENSSSCG00000051543	snv
	9	80004409	T	C	0.652174	F0-657	edited_step	fix	intergenic_region	MODIFIER	ENSSSCG00000051507-ENSSSCG00000051543	ENSSSCG00000051507-ENSSSCG00000051543	snv
	9	80856072	G	T	0.554348	F0-657	edited_step	fix	intron_variant	MODIFIER	PHF14	ENSSSCG00000026722	snv
	9	81178267	T	G	0.0117647	F0-657	isolation_step	fix	intron_variant	MODIFIER	THSD7A	ENSSSCG00000015350	snv
	9	81828626	T	G	0.578431	F0-657	edited_step	fix	upstream_gene_variant	MODIFIER	ENSSSCG00000041760	ENSSSCG00000041760	snv
	9	82117796	A	T	0.466102	F0-657	nuclear_transfor_step	fix	intron_variant	MODIFIER	SCIN	ENSSSCG00000015353	snv
	9	84178546	A	G	0.481481	F0-657	edited_step	fix	intron_variant	MODIFIER	DGKB	ENSSSCG00000015355	snv
	9	91422972	G	C	0.39726	F0-657	edited_step	fix	intron_variant	MODIFIER	RAPGEF5	ENSSSCG00000015383	snv
	9	93984184	G	T	0.51145	F0-657	nuclear_transfor_step	fix	intergenic_region	MODIFIER	GRM3-ENSSSCG00000042783	ENSSSCG00000015395-ENSSSCG00000042783	snv
	9	96622053	A	C	0.025641	F0-657	isolation_step	fix	intergenic_region	MODIFIER	ENSSSCG00000042325-ENSSSCG00000048808	ENSSSCG00000042325-ENSSSCG00000048808	snv
	9	98806234	A	G	0.410448	F0-657	nuclear_transfor_step	fix	intergenic_region	MODIFIER	ENSSSCG00000051110-SEMA3C	ENSSSCG00000051110-ENSSSCG00000023784	snv
	9	101073352	A	G	0.5	F0-657	nuclear_transfor_step	fix	intron_variant	MODIFIER	MAGI2	ENSSSCG00000031780	snv
	9	101117010	T	C	0.46875	F0-657	nuclear_transfor_step	fix	intron_variant	MODIFIER	MAGI2	ENSSSCG00000031780	snv
	9	101289956	A	G	0.38835	F0-657	nuclear_transfor_step	fix	intron_variant	MODIFIER	MAGI2	ENSSSCG00000031780	snv
	9	101408400	A	T	0.5625	F0-657	nuclear_transfor_step	fix	intron_variant	MODIFIER	MAGI2	ENSSSCG00000031780	snv
	9	104269697	T	C	0.50495	F0-657	edited_step	fix	intergenic_region	MODIFIER	ORC5-LHFPL3	ENSSSCG00000015427-ENSSSCG00000035554	snv
	9	106719968	G	A	0.47	F0-657	edited_step	fix	intron_variant	MODIFIER	PIK3CG	ENSSSCG00000027272	snv
	9	109110288	T	A	0.317757	F0-657	edited_step	fix	intergenic_region	MODIFIER	ENSSSCG00000046573-ZNF398	ENSSSCG00000046573-ENSSSCG00000030294	snv
	9	110878980	G	T	0.0113636	F0-657	isolation_step	fix	intergenic_region	MODIFIER	ENSSSCG00000015460-ENSSSCG00000051084	ENSSSCG00000015460-ENSSSCG00000051084	snv
	9	110888306	C	T	0.571429	F0-657	edited_step	fix	intergenic_region	MODIFIER	ENSSSCG00000015460-ENSSSCG00000051084	ENSSSCG00000015460-ENSSSCG00000051084	snv
	9	119713382	A	T	0.529412	F0-657	edited_step	fix	intergenic_region	MODIFIER	ENSSSCG00000050832-SEC16B	ENSSSCG00000050832-ENSSSCG00000039332	snv
	9	121073855	A	C	0.56044	F0-657	edited_step	fix	intron_variant	MODIFIER	SOAT1	ENSSSCG00000021464	snv
	9	121249400	C	T	0.451613	F0-657	nuclear_transfor_step	fix	intron_variant	MODIFIER	TDRD5	ENSSSCG00000015527	snv
	9	123028616	C	A	0.479675	F0-657	nuclear_transfor_step	fix	intron_variant	MODIFIER	CACNA1E	ENSSSCG00000015543	snv
	9	123858036	C	A	0.641975	F0-657	nuclear_transfor_step	fix	intron_variant	MODIFIER	RGSL1	ENSSSCG00000015548	snv
	9	128940842	C	T	0.106195	F0-657	edited_step	fix	intergenic_region	MODIFIER	ENSSSCG00000045788-CENPF	ENSSSCG00000045788-ENSSSCG00000015581	snv
	9	129166119	C	T	0.354839	F0-657	edited_step	fix	intron_variant	MODIFIER	PTPN14	ENSSSCG00000015582	snv
	9	129233198	G	C	0.59292	F0-657	edited_step	fix	intron_variant	MODIFIER	PTPN14	ENSSSCG00000015582	snv
	9	129664874	G	T	0.0123457	F0-657	edited_step	fix	upstream_gene_variant	MODIFIER	ENSSSCG00000050221	ENSSSCG00000050221	snv
	9	131506566	G	T	0.511628	F0-657	edited_step	fix	downstream_gene_variant	MODIFIER	LPGAT1	ENSSSCG00000015603	snv
	9	132441848	C	T	0.495575	F0-657	edited_step	fix	intron_variant	MODIFIER	HHAT	ENSSSCG00000015607	snv
	9	136375605	A	G	0.431818	F0-657	edited_step	fix	upstream_gene_variant	MODIFIER	IKZF1	ENSSSCG00000038345	snv
	9	136388314	A	C	0.0121951	F0-657	edited_step	fix	intron_variant	MODIFIER	IKZF1	ENSSSCG00000038345	snv
	9	137089494	C	G	0.478632	F0-657	nuclear_transfor_step	fix	downstream_gene_variant	MODIFIER	ENSSSCG00000047256	ENSSSCG00000047256	snv
	9	138659482	A	C	0.521127	F0-657	nuclear_transfor_step	fix	intergenic_region	MODIFIER	ENSSSCG00000047174-ENSSSCG00000042436	ENSSSCG00000047174-ENSSSCG00000042436	snv
	10	431141	T	G	0.481752	F0-657	nuclear_transfor_step	fix	intergenic_region	MODIFIER	ENSSSCG00000046444-CDC73	ENSSSCG00000046444-ENSSSCG00000010801	snv
	10	1518983	C	A	0.307692	F0-657	nuclear_transfor_step	fix	downstream_gene_variant	MODIFIER	RGS18	ENSSSCG00000033945	snv
	10	1768676	G	A	0.52	F0-657	edited_step	fix	intergenic_region	MODIFIER	ENSSSCG00000051092-ENSSSCG00000045242	ENSSSCG00000051092-ENSSSCG00000045242	snv
	10	1859931	C	T	0.011236	F0-657	edited_step	fix	intergenic_region	MODIFIER	ENSSSCG00000051092-ENSSSCG00000045242	ENSSSCG00000051092-ENSSSCG00000045242	snv
	10	2817472	A	T	0.442105	F0-657	edited_step	fix	intergenic_region	MODIFIER	ENSSSCG00000042899-BRINP3	ENSSSCG00000042899-ENSSSCG00000010809	snv
	10	4353141	C	A	0.554545	F0-657	nuclear_transfor_step	fix	intergenic_region	MODIFIER	Y_RNA-ENSSSCG00000045101	ENSSSCG00000018504-ENSSSCG00000045101	snv
	10	4353238	G	A	0.528	F0-657	edited_step	fix	intergenic_region	MODIFIER	Y_RNA-ENSSSCG00000045101	ENSSSCG00000018504-ENSSSCG00000045101	snv
	10	4575108	G	T	0.433628	F0-657	nuclear_transfor_step	fix	intergenic_region	MODIFIER	Y_RNA-ENSSSCG00000045101	ENSSSCG00000018504-ENSSSCG00000045101	snv
	10	4734065	T	C	0.516129	F0-657	nuclear_transfor_step	fix	intergenic_region	MODIFIER	ENSSSCG00000045101-ENSSSCG00000041246	ENSSSCG00000045101-ENSSSCG00000041246	snv
	10	6211304	T	A	0.504587	F0-657	nuclear_transfor_step	fix	intergenic_region	MODIFIER	KCTD3-ENSSSCG00000038066	ENSSSCG00000010811-ENSSSCG00000038066	snv
	10	6261147	T	C	0.0135135	F0-657	isolation_step	fix	intergenic_region	MODIFIER	KCTD3-ENSSSCG00000038066	ENSSSCG00000010811-ENSSSCG00000038066	snv
	10	6351627	A	G	0.490909	F0-657	edited_step	fix	intergenic_region	MODIFIER	KCTD3-ENSSSCG00000038066	ENSSSCG00000010811-ENSSSCG00000038066	snv
	10	6860306	A	G	0.542553	F0-657	edited_step	fix	upstream_gene_variant	MODIFIER	ENSSSCG00000050713	ENSSSCG00000050713	snv
	10	6986923	G	A	0.0151515	F0-657	edited_step	fix	intron_variant	MODIFIER	ESRRG	ENSSSCG00000010814	snv
	10	10698927	G	T	0.0108696	F0-657	isolation_step	fix	intergenic_region	MODIFIER	ENSSSCG00000041151-ENSSSCG00000048691	ENSSSCG00000041151-ENSSSCG00000048691	snv
	10	10850027	G	A	0.457447	F0-657	edited_step	fix	intergenic_region	MODIFIER	ENSSSCG00000048691-DUSP10	ENSSSCG00000048691-ENSSSCG00000010831	snv
	10	13004382	C	A	0.509804	F0-657	nuclear_transfor_step	fix	intergenic_region	MODIFIER	CNIH3-ENSSSCG00000051138	ENSSSCG00000034972-ENSSSCG00000051138	snv
	10	13322426	A	T	0.414894	F0-657	edited_step	fix	intron_variant	MODIFIER	ENSSSCG00000031483	ENSSSCG00000031483	snv
	10	15399733	C	T	0.520408	F0-657	edited_step	fix	intergenic_region	MODIFIER	BECN2-PLD5	ENSSSCG00000010868-ENSSSCG00000021132	snv
	10	15815756	A	G	0.46988	F0-657	edited_step	fix	intergenic_region	MODIFIER	PLD5-CEP170	ENSSSCG00000021132-ENSSSCG00000030502	snv
	10	18580936	C	G	0.168142	F0-657	edited_step	fix	intron_variant	MODIFIER	SMYD3	ENSSSCG00000022034	snv
	10	19625734	C	A	0.506494	F0-657	edited_step	fix	intron_variant	MODIFIER	CAPN8	ENSSSCG00000034746	snv
	10	26690608	A	G	0.494949	F0-657	edited_step	fix	intron_variant	MODIFIER	PTCH1	ENSSSCG00000027312	snv
	10	26895632	C	T	0.277372	F0-657	edited_step	fix	intron_variant	MODIFIER	ENSSSCG00000033654	ENSSSCG00000033654	snv
	10	28493510	C	A	0.484848	F0-657	edited_step	fix	non_coding_transcript_exon_variant	MODIFIER	ENSSSCG00000044123	ENSSSCG00000044123	snv
	10	29759948	G	T	0.05	F0-657	edited_step	fix	intergenic_region	MODIFIER	ENSSSCG00000048825-U2	ENSSSCG00000048825-ENSSSCG00000049960	snv
	10	30467540	T	G	0.0336134	F0-657	edited_step	fix	intron_variant	MODIFIER	ENSSSCG00000042859	ENSSSCG00000042859	snv
	10	32970241	C	A	0.489583	F0-657	edited_step	fix	intron_variant	MODIFIER	UBE2R2	ENSSSCG00000034725	snv
	10	33565664	C	T	0.521739	F0-657	edited_step	fix	intron_variant	MODIFIER	NDUFB6	ENSSSCG00000011003	snv
	10	33951100	C	T	0.0142857	F0-657	edited_step	fix	intron_variant	MODIFIER	ACO1	ENSSSCG00000023807	snv
	10	34748346	G	T	0.264957	F0-657	edited_step	fix	intergenic_region	MODIFIER	ENSSSCG00000051170-ENSSSCG00000045956	ENSSSCG00000051170-ENSSSCG00000045956	snv
	10	35317668	T	A	0.504505	F0-657	edited_step	fix	intergenic_region	MODIFIER	ENSSSCG00000047601-ENSSSCG00000032000	ENSSSCG00000047601-ENSSSCG00000032000	snv
	10	35318909	G	T	0.473684	F0-657	nuclear_transfor_step	fix	intergenic_region	MODIFIER	ENSSSCG00000047601-ENSSSCG00000032000	ENSSSCG00000047601-ENSSSCG00000032000	snv
	10	36233046	A	G	0.496183	F0-657	edited_step	fix	intergenic_region	MODIFIER	U6-ENSSSCG00000048189	ENSSSCG00000040094-ENSSSCG00000048189	snv
	10	36779634	T	G	0.0175439	F0-657	isolation_step	fix	intron_variant	MODIFIER	ENSSSCG00000041068	ENSSSCG00000041068	snv
	10	41085536	C	G	0.587302	F0-657	edited_step	fix	intergenic_region	MODIFIER	JCAD-ENSSSCG00000044936	ENSSSCG00000011020-ENSSSCG00000044936	snv
	10	44293977	C	T	0.52381	F0-657	nuclear_transfor_step	fix	intron_variant	MODIFIER	SLC39A12	ENSSSCG00000011039	snv
	10	54555124	G	C	0.588785	F0-657	edited_step	fix	intron_variant	MODIFIER	PLXDC2	ENSSSCG00000032444	snv
	10	54586233	T	C	0.5	F0-657	edited_step	fix	intron_variant	MODIFIER	PLXDC2	ENSSSCG00000032444	snv
	10	55330943	C	G	0.495575	F0-657	nuclear_transfor_step	fix	intron_variant	MODIFIER	ENSSSCG00000040615	ENSSSCG00000040615	snv
	10	62678008	A	G	0.459459	F0-657	edited_step	fix	intergenic_region	MODIFIER	ENSSSCG00000051465-ENSSSCG00000043907	ENSSSCG00000051465-ENSSSCG00000043907	snv
	10	63864914	G	C	0.53	F0-657	nuclear_transfor_step	fix	upstream_gene_variant	MODIFIER	ENSSSCG00000047886	ENSSSCG00000047886	snv
	10	67628913	C	A	0.387755	F0-657	edited_step	fix	intergenic_region	MODIFIER	ENSSSCG00000046968-ENSSSCG00000048251	ENSSSCG00000046968-ENSSSCG00000048251	snv
	10	67726255	G	T	0.428571	F0-657	edited_step	fix	intergenic_region	MODIFIER	ENSSSCG00000046968-ENSSSCG00000048251	ENSSSCG00000046968-ENSSSCG00000048251	snv
	10	67726257	G	T	0.419355	F0-657	edited_step	fix	intergenic_region	MODIFIER	ENSSSCG00000046968-ENSSSCG00000048251	ENSSSCG00000046968-ENSSSCG00000048251	snv
	10	67842176	A	T	0.439716	F0-657	nuclear_transfor_step	fix	intron_variant	MODIFIER	ENSSSCG00000048251	ENSSSCG00000048251	snv
	10	68214395	G	T	0.49635	F0-657	nuclear_transfor_step	fix	intron_variant	MODIFIER	ADARB2	ENSSSCG00000011160	snv
	10	68337067	C	A	0.15493	F0-657	edited_step	fix	intron_variant	MODIFIER	ADARB2	ENSSSCG00000011160	snv
	10	68591073	T	G	0.408602	F0-657	edited_step	fix	intergenic_region	MODIFIER	ENSSSCG00000044281-ENSSSCG00000011162	ENSSSCG00000044281-ENSSSCG00000011162	snv
	11	4399982	C	A	0.640777	F0-657	nuclear_transfor_step	fix	intergenic_region	MODIFIER	WASF3-GPR12	ENSSSCG00000009300-ENSSSCG00000009301	snv
	11	5887284	A	G	0.476923	F0-657	nuclear_transfor_step	fix	intron_variant	MODIFIER	ENSSSCG00000044497	ENSSSCG00000044497	snv
	11	11469054	T	C	0.528302	F0-657	edited_step	fix	intron_variant	MODIFIER	NBEA	ENSSSCG00000034348	snv
	11	12343512	G	T	0.645833	F0-657	edited_step	fix	intron_variant	MODIFIER	SPART	ENSSSCG00000024635	snv
	11	17128513	T	A	0.543478	F0-657	nuclear_transfor_step	fix	intergenic_region	MODIFIER	ENSSSCG00000042045-ENSSSCG00000049891	ENSSSCG00000042045-ENSSSCG00000049891	snv
	11	17439486	C	T	0.0606061	F0-657	edited_step	fix	intron_variant	MODIFIER	ENSSSCG00000045895	ENSSSCG00000045895	snv
	11	17758698	A	C	0.427083	F0-657	nuclear_transfor_step	fix	downstream_gene_variant	MODIFIER	MIR15A	ENSSSCG00000019092	snv
	11	17794165	T	C	0.508929	F0-657	nuclear_transfor_step	fix	3_prime_UTR_variant	MODIFIER	TRIM13	ENSSSCG00000009389	snv
	11	18246599	A	T	0.485714	F0-657	nuclear_transfor_step	fix	intron_variant	MODIFIER	PHF11	ENSSSCG00000009396	snv
	11	20015415	A	G	0.52	F0-657	edited_step	fix	intergenic_region	MODIFIER	ENSSSCG00000051153-ENSSSCG00000042745	ENSSSCG00000051153-ENSSSCG00000042745	snv
	11	20015437	A	G	0.0113636	F0-657	isolation_step	fix	intergenic_region	MODIFIER	ENSSSCG00000051153-ENSSSCG00000042745	ENSSSCG00000051153-ENSSSCG00000042745	snv
	11	22546692	C	A	0.504	F0-657	nuclear_transfor_step	fix	intron_variant	MODIFIER	TSC22D1	ENSSSCG00000009422	snv
	11	23509262	A	G	0.515152	F0-657	nuclear_transfor_step	fix	intron_variant	MODIFIER	ENOX1	ENSSSCG00000021818	snv
	11	24368510	G	A	0.467742	F0-657	edited_step	fix	intergenic_region	MODIFIER	FAM216B-TNFSF11	ENSSSCG00000009428-ENSSSCG00000009429	snv
	11	26083314	C	A	0.564356	F0-657	edited_step	fix	intergenic_region	MODIFIER	CNMD-PCDH8	ENSSSCG00000009442-ENSSSCG00000009445	snv
	11	26680208	C	A	0.245098	F0-657	edited_step	fix	intergenic_region	MODIFIER	U2-ENSSSCG00000036916	ENSSSCG00000042381-ENSSSCG00000036916	snv
	11	27347659	C	A	0.506849	F0-657	nuclear_transfor_step	fix	intergenic_region	MODIFIER	U6-ENSSSCG00000047629	ENSSSCG00000019244-ENSSSCG00000047629	snv
	11	27858950	C	A	0.0392157	F0-657	edited_step	fix	intergenic_region	MODIFIER	U6-ENSSSCG00000047629	ENSSSCG00000019244-ENSSSCG00000047629	snv
	11	28744115	C	T	0.47619	F0-657	edited_step	fix	intergenic_region	MODIFIER	ENSSSCG00000043491-ENSSSCG00000035135	ENSSSCG00000043491-ENSSSCG00000035135	snv
	11	28885853	A	T	0.546512	F0-657	edited_step	fix	intergenic_region	MODIFIER	ENSSSCG00000043491-ENSSSCG00000035135	ENSSSCG00000043491-ENSSSCG00000035135	snv
	11	28942071	T	A	0.659574	F0-657	nuclear_transfor_step	fix	intergenic_region	MODIFIER	ENSSSCG00000043491-ENSSSCG00000035135	ENSSSCG00000043491-ENSSSCG00000035135	snv
	11	29271873	C	A	0.581197	F0-657	nuclear_transfor_step	fix	intergenic_region	MODIFIER	ENSSSCG00000043491-ENSSSCG00000035135	ENSSSCG00000043491-ENSSSCG00000035135	snv
	11	29666937	A	C	0.494505	F0-657	nuclear_transfor_step	fix	intergenic_region	MODIFIER	ENSSSCG00000035135-PCDH17	ENSSSCG00000035135-ENSSSCG00000009446	snv
	11	29927371	T	A	0.517857	F0-657	edited_step	fix	intergenic_region	MODIFIER	ENSSSCG00000035135-PCDH17	ENSSSCG00000035135-ENSSSCG00000009446	snv
	11	31022061	A	G	0.542373	F0-657	nuclear_transfor_step	fix	intergenic_region	MODIFIER	ENSSSCG00000041562-ENSSSCG00000047039	ENSSSCG00000041562-ENSSSCG00000047039	snv
	11	31896847	T	A	0.630137	F0-657	edited_step	fix	intergenic_region	MODIFIER	ENSSSCG00000047665-ENSSSCG00000046780	ENSSSCG00000047665-ENSSSCG00000046780	snv
	11	32885022	A	G	0.531746	F0-657	nuclear_transfor_step	fix	intron_variant	MODIFIER	DIAPH3	ENSSSCG00000009448	snv
	11	34246716	T	G	0.00840336	F0-657	edited_step	fix	intergenic_region	MODIFIER	ENSSSCG00000020435-ENSSSCG00000031955	ENSSSCG00000020435-ENSSSCG00000031955	snv
	11	34830124	A	G	0.506329	F0-657	edited_step	fix	intergenic_region	MODIFIER	ENSSSCG00000043875-ENSSSCG00000051718	ENSSSCG00000043875-ENSSSCG00000051718	snv
	11	35690509	C	A	0.383838	F0-657	edited_step	fix	intergenic_region	MODIFIER	ENSSSCG00000051718-U6	ENSSSCG00000051718-ENSSSCG00000018929	snv
	11	35967099	A	C	0.4375	F0-657	edited_step	fix	intergenic_region	MODIFIER	ENSSSCG00000051718-U6	ENSSSCG00000051718-ENSSSCG00000018929	snv
	11	36518427	G	A	0.510417	F0-657	edited_step	fix	intergenic_region	MODIFIER	U6-ENSSSCG00000036413	ENSSSCG00000018929-ENSSSCG00000036413	snv
	11	37879740	A	T	0.504132	F0-657	nuclear_transfor_step	fix	intergenic_region	MODIFIER	U6-ENSSSCG00000051326	ENSSSCG00000038636-ENSSSCG00000051326	snv
	11	38416045	C	A	0.542857	F0-657	nuclear_transfor_step	fix	intergenic_region	MODIFIER	ENSSSCG00000051326-PCDH9	ENSSSCG00000051326-ENSSSCG00000038842	snv
	11	39008350	G	C	0.147059	F0-657	edited_step	fix	downstream_gene_variant	MODIFIER	ENSSSCG00000041334	ENSSSCG00000041334	snv
	11	39585536	T	A	0.484848	F0-657	edited_step	fix	intergenic_region	MODIFIER	PCDH9-ENSSSCG00000048586	ENSSSCG00000038842-ENSSSCG00000048586	snv
	11	40655347	A	C	0.494845	F0-657	edited_step	fix	intergenic_region	MODIFIER	ENSSSCG00000047489-ENSSSCG00000048977	ENSSSCG00000047489-ENSSSCG00000048977	snv
	11	40655400	G	C	0.520833	F0-657	edited_step	fix	intergenic_region	MODIFIER	ENSSSCG00000047489-ENSSSCG00000048977	ENSSSCG00000047489-ENSSSCG00000048977	snv
	11	41809238	C	A	0.525	F0-657	edited_step	fix	intergenic_region	MODIFIER	ENSSSCG00000041007-KLHL1	ENSSSCG00000041007-ENSSSCG00000009456	snv
	11	42293252	T	C	0.546512	F0-657	edited_step	fix	intron_variant	MODIFIER	KLHL1	ENSSSCG00000009456	snv
	11	43910972	T	G	0.44186	F0-657	edited_step	fix	intron_variant	MODIFIER	DACH1	ENSSSCG00000009457	snv
	11	44322012	T	A	0.442105	F0-657	nuclear_transfor_step	fix	intergenic_region	MODIFIER	DACH1-U6	ENSSSCG00000009457-ENSSSCG00000018387	snv
	11	44781100	G	A	0.546392	F0-657	edited_step	fix	intergenic_region	MODIFIER	U6-ENSSSCG00000050492	ENSSSCG00000018387-ENSSSCG00000050492	snv
	11	45421212	C	A	0.482759	F0-657	edited_step	fix	intergenic_region	MODIFIER	KLF5-ENSSSCG00000045422	ENSSSCG00000035101-ENSSSCG00000045422	snv
	11	48004317	T	C	0.481013	F0-657	edited_step	fix	intron_variant	MODIFIER	LMO7	ENSSSCG00000040184	snv
	11	48610847	T	C	0.512	F0-657	nuclear_transfor_step	fix	intergenic_region	MODIFIER	ENSSSCG00000050426-ENSSSCG00000046323	ENSSSCG00000050426-ENSSSCG00000046323	snv
	11	48610854	T	A	0.507812	F0-657	nuclear_transfor_step	fix	intergenic_region	MODIFIER	ENSSSCG00000050426-ENSSSCG00000046323	ENSSSCG00000050426-ENSSSCG00000046323	snv
	11	52925078	C	T	0.551282	F0-657	edited_step	fix	intergenic_region	MODIFIER	SNORA70-ENSSSCG00000045873	ENSSSCG00000021526-ENSSSCG00000045873	snv
	11	54855135	G	T	0.0166667	F0-657	edited_step	fix	intergenic_region	MODIFIER	ENSSSCG00000047723-SLITRK1	ENSSSCG00000047723-ENSSSCG00000009485	snv
	11	55567276	T	G	0.0166667	F0-657	isolation_step	fix	non_coding_transcript_exon_variant	MODIFIER	ENSSSCG00000047575	ENSSSCG00000047575	snv
	11	55578571	T	C	0.5	F0-657	edited_step	fix	intergenic_region	MODIFIER	ENSSSCG00000047575-ENSSSCG00000044970	ENSSSCG00000047575-ENSSSCG00000044970	snv
	11	55960010	T	C	0.46729	F0-657	edited_step	fix	intergenic_region	MODIFIER	ENSSSCG00000042996-SLITRK6	ENSSSCG00000042996-ENSSSCG00000009486	snv
	11	56771422	A	C	0.516484	F0-657	edited_step	fix	intergenic_region	MODIFIER	SLITRK6-ENSSSCG00000033995	ENSSSCG00000009486-ENSSSCG00000033995	snv
	11	57433448	T	A	0.601942	F0-657	edited_step	fix	upstream_gene_variant	MODIFIER	ENSSSCG00000033995	ENSSSCG00000033995	snv
	11	57455364	T	C	0.553191	F0-657	edited_step	fix	intergenic_region	MODIFIER	ENSSSCG00000033995-ENSSSCG00000046381	ENSSSCG00000033995-ENSSSCG00000046381	snv
	11	59128338	T	G	0.388889	F0-657	nuclear_transfor_step	fix	intergenic_region	MODIFIER	ENSSSCG00000050699-ENSSSCG00000048437	ENSSSCG00000050699-ENSSSCG00000048437	snv
	11	59349429	G	A	0.533333	F0-657	nuclear_transfor_step	fix	intergenic_region	MODIFIER	ENSSSCG00000047426-ENSSSCG00000044716	ENSSSCG00000047426-ENSSSCG00000044716	snv
	11	59536443	T	A	0.461538	F0-657	edited_step	fix	intergenic_region	MODIFIER	ENSSSCG00000044716-ENSSSCG00000043859	ENSSSCG00000044716-ENSSSCG00000043859	snv
	11	59613410	A	G	0.0361446	F0-657	edited_step	fix	intergenic_region	MODIFIER	ENSSSCG00000044716-ENSSSCG00000043859	ENSSSCG00000044716-ENSSSCG00000043859	snv
	11	61424981	T	A	0.550847	F0-657	nuclear_transfor_step	fix	intron_variant	MODIFIER	GPC5	ENSSSCG00000031946	snv
	11	61424989	G	A	0.560345	F0-657	nuclear_transfor_step	fix	intron_variant	MODIFIER	GPC5	ENSSSCG00000031946	snv
	11	61689235	G	A	0.53271	F0-657	edited_step	fix	intron_variant	MODIFIER	GPC5	ENSSSCG00000031946	snv
	11	62004143	T	C	0.396396	F0-657	nuclear_transfor_step	fix	intron_variant	MODIFIER	GPC5	ENSSSCG00000031946	snv
	11	62353970	C	A	0.268041	F0-657	edited_step	fix	intergenic_region	MODIFIER	U6-GPC6	ENSSSCG00000032310-ENSSSCG00000009489	snv
	11	66275027	C	G	0.484536	F0-657	edited_step	fix	intergenic_region	MODIFIER	HS6ST3-ENSSSCG00000024459	ENSSSCG00000009503-ENSSSCG00000024459	snv
	11	67331748	T	C	0.459854	F0-657	nuclear_transfor_step	fix	upstream_gene_variant	MODIFIER	FARP1	ENSSSCG00000026863	snv
	11	70464710	T	C	0.455285	F0-657	nuclear_transfor_step	fix	intron_variant	MODIFIER	FGF14	ENSSSCG00000009527	snv
	11	70855976	A	G	0.468085	F0-657	edited_step	fix	intron_variant	MODIFIER	FGF14	ENSSSCG00000009527	snv
	11	71504786	T	C	0.243243	F0-657	edited_step	fix	intergenic_region	MODIFIER	SLC10A2-ENSSSCG00000047974	ENSSSCG00000026317-ENSSSCG00000047974	snv
	11	71947134	T	C	0.561151	F0-657	nuclear_transfor_step	fix	intron_variant	MODIFIER	ENSSSCG00000043665	ENSSSCG00000043665	snv
	11	73128407	G	A	0.456522	F0-657	edited_step	fix	intergenic_region	MODIFIER	ENSSSCG00000048931-ENSSSCG00000045311	ENSSSCG00000048931-ENSSSCG00000045311	snv
	11	74892113	G	A	0.53125	F0-657	edited_step	fix	intron_variant	MODIFIER	FAM155A	ENSSSCG00000040130	snv
	11	74959393	T	G	0.405172	F0-657	edited_step	fix	intron_variant	MODIFIER	FAM155A	ENSSSCG00000040130	snv
	11	77070791	C	T	0.516949	F0-657	nuclear_transfor_step	fix	intron_variant	MODIFIER	COL4A2	ENSSSCG00000009545	snv
	12	554615	C	G	0.441441	F0-657	nuclear_transfor_step	fix	upstream_gene_variant	MODIFIER	ENSSSCG00000047757	ENSSSCG00000047757	snv
	12	627104	C	G	0.00869565	F0-657	edited_step	fix	intergenic_region	MODIFIER	FOXK2-NARF	ENSSSCG00000017125-ENSSSCG00000017126	snv
	12	8990741	C	T	0.410256	F0-657	edited_step	fix	intergenic_region	MODIFIER	ENSSSCG00000044587-ENSSSCG00000048915	ENSSSCG00000044587-ENSSSCG00000048915	snv
	12	9914853	G	T	0.415929	F0-657	nuclear_transfor_step	fix	intergenic_region	MODIFIER	ENSSSCG00000048915-ENSSSCG00000043713	ENSSSCG00000048915-ENSSSCG00000043713	snv
	12	12975400	G	T	0.508621	F0-657	nuclear_transfor_step	fix	intron_variant	MODIFIER	PRKCA	ENSSSCG00000017268	snv
	12	14932834	G	C	0.481928	F0-657	edited_step	fix	intron_variant	MODIFIER	ICAM2	ENSSSCG00000039909	snv
	12	16486073	A	G	0.458065	F0-657	nuclear_transfor_step	fix	intergenic_region	MODIFIER	ENSSSCG00000045518-ENSSSCG00000047329	ENSSSCG00000045518-ENSSSCG00000047329	snv
	12	22721129	C	A	0.0851064	F0-657	edited_step	fix	downstream_gene_variant	MODIFIER	ENSSSCG00000047443	ENSSSCG00000047443	snv
	12	27713779	T	C	0.53125	F0-657	edited_step	fix	intergenic_region	MODIFIER	UTP18-ENSSSCG00000044978	ENSSSCG00000017593-ENSSSCG00000044978	snv
	12	28064836	C	G	0.510204	F0-657	edited_step	fix	intron_variant	MODIFIER	CA10	ENSSSCG00000023169	snv
	12	28312347	C	T	0.45614	F0-657	nuclear_transfor_step	fix	intron_variant	MODIFIER	CA10	ENSSSCG00000023169	snv
	12	28459583	A	T	0.588235	F0-657	edited_step	fix	intron_variant	MODIFIER	CA10	ENSSSCG00000023169	snv
	12	29222661	T	C	0.452991	F0-657	nuclear_transfor_step	fix	intergenic_region	MODIFIER	ENSSSCG00000047265-KIF2B	ENSSSCG00000047265-ENSSSCG00000017599	snv
	12	30281536	A	C	0.516667	F0-657	edited_step	fix	intergenic_region	MODIFIER	KIF2B-ENSSSCG00000034257	ENSSSCG00000017599-ENSSSCG00000034257	snv
	12	32343049	A	C	0.487179	F0-657	edited_step	fix	intergenic_region	MODIFIER	ENSSSCG00000017608-ANKFN1	ENSSSCG00000017608-ENSSSCG00000017609	snv
	12	32872126	C	T	0.508197	F0-657	edited_step	fix	intergenic_region	MODIFIER	ANKFN1-ENSSSCG00000048595	ENSSSCG00000017609-ENSSSCG00000048595	snv
	12	32926760	A	G	0.415254	F0-657	nuclear_transfor_step	fix	intergenic_region	MODIFIER	5S_rRNA-C17orf67	ENSSSCG00000031120-ENSSSCG00000030781	snv
	12	34168560	C	T	0.538462	F0-657	edited_step	fix	upstream_gene_variant	MODIFIER	CUEDC1	ENSSSCG00000017624	snv
	12	37286085	G	T	0.452632	F0-657	edited_step	fix	intron_variant	MODIFIER	BCAS3	ENSSSCG00000017676	snv
	12	39480973	C	A	0.5	F0-657	edited_step	fix	5_prime_UTR_premature_start_codon_gain_variant	LOW	CCL4	ENSSSCG00000032343	snv
	12	46030489	C	A	0.00740741	F0-657	isolation_step	fix	intergenic_region	MODIFIER	ENSSSCG00000046826-ENSSSCG00000047097	ENSSSCG00000046826-ENSSSCG00000047097	snv
	12	47482569	C	T	0.435484	F0-657	edited_step	fix	intron_variant	MODIFIER	RPH3AL	ENSSSCG00000036705	snv
	12	48976076	G	A	0.506494	F0-657	edited_step	fix	intron_variant	MODIFIER	ENSSSCG00000034858	ENSSSCG00000034858	snv
	12	49390268	C	T	0.537313	F0-657	edited_step	fix	missense_variant	MODERATE	ENSSSCG00000031932	ENSSSCG00000031932	snv
	12	50979529	T	A	0.482143	F0-657	edited_step	fix	intergenic_region	MODIFIER	AIPL1-WSCD1	ENSSSCG00000022026-ENSSSCG00000017894	snv
	12	53416230	A	C	0.438202	F0-657	edited_step	fix	upstream_gene_variant	MODIFIER	AURKB	ENSSSCG00000028924	snv
	12	55241066	T	C	0.472973	F0-657	edited_step	fix	intron_variant	MODIFIER	ENSSSCG00000029441	ENSSSCG00000029441	snv
	12	56168028	T	C	0.534247	F0-657	edited_step	fix	intron_variant	MODIFIER	DNAH9	ENSSSCG00000018015	snv
	12	60859660	C	A	0.459459	F0-657	edited_step	fix	upstream_gene_variant	MODIFIER	RAI1	ENSSSCG00000038164	snv
	12	61437644	C	A	0.532258	F0-657	edited_step	fix	intergenic_region	MODIFIER	MAP2K3-ENSSSCG00000051348	ENSSSCG00000034379-ENSSSCG00000051348	snv
	13	3184336	G	T	0.4375	F0-657	nuclear_transfor_step	fix	intergenic_region	MODIFIER	ENSSSCG00000047471-ENSSSCG00000045983	ENSSSCG00000047471-ENSSSCG00000045983	snv
	13	4963687	G	A	0.0107527	F0-657	isolation_step	fix	intergenic_region	MODIFIER	U6-ENSSSCG00000043505	ENSSSCG00000021394-ENSSSCG00000043505	snv
	13	5685904	A	G	0.578947	F0-657	nuclear_transfor_step	fix	intergenic_region	MODIFIER	ENSSSCG00000048167-ENSSSCG00000051389	ENSSSCG00000048167-ENSSSCG00000051389	snv
	13	5949544	A	C	0.62069	F0-657	nuclear_transfor_step	fix	intergenic_region	MODIFIER	ENSSSCG00000041832-ENSSSCG00000042599	ENSSSCG00000041832-ENSSSCG00000042599	snv
	13	6362328	G	T	0.513274	F0-657	edited_step	fix	intron_variant	MODIFIER	KCNH8	ENSSSCG00000011204	snv
	13	7273279	T	A	0.0172414	F0-657	edited_step	fix	intergenic_region	MODIFIER	ENSSSCG00000011206-ENSSSCG00000044861	ENSSSCG00000011206-ENSSSCG00000044861	snv
	13	7574904	C	A	0.564815	F0-657	nuclear_transfor_step	fix	intergenic_region	MODIFIER	ENSSSCG00000011206-ENSSSCG00000044861	ENSSSCG00000011206-ENSSSCG00000044861	snv
	13	9026454	T	C	0.618557	F0-657	edited_step	fix	intron_variant	MODIFIER	ENSSSCG00000051315	ENSSSCG00000051315	snv
	13	10020031	A	C	0.642857	F0-657	nuclear_transfor_step	fix	intron_variant	MODIFIER	UBE2E2	ENSSSCG00000031392	snv
	13	10202274	T	C	0.582278	F0-657	edited_step	fix	intron_variant	MODIFIER	UBE2E2	ENSSSCG00000031392	snv
	13	11012611	T	A	0.410448	F0-657	nuclear_transfor_step	fix	intron_variant	MODIFIER	THRB	ENSSSCG00000036033	snv
	13	17430136	A	G	0.514563	F0-657	nuclear_transfor_step	fix	intergenic_region	MODIFIER	U6-STT3B	ENSSSCG00000019936-ENSSSCG00000011229	snv
	13	20124536	T	C	0.559055	F0-657	nuclear_transfor_step	fix	intergenic_region	MODIFIER	ENSSSCG00000047854-ENSSSCG00000044082	ENSSSCG00000047854-ENSSSCG00000044082	snv
	13	20320348	G	A	0.548077	F0-657	edited_step	fix	intron_variant	MODIFIER	ENSSSCG00000044082	ENSSSCG00000044082	snv
	13	27425195	G	T	0.402985	F0-657	nuclear_transfor_step	fix	intron_variant	MODIFIER	ENSSSCG00000045193	ENSSSCG00000045193	snv
	13	28169912	G	A	0.00793651	F0-657	edited_step	fix	intron_variant	MODIFIER	ZDHHC3	ENSSSCG00000011301	snv
	13	32166382	G	T	0.48227	F0-657	nuclear_transfor_step	fix	intron_variant	MODIFIER	BSN	ENSSSCG00000011384	snv
	13	33441084	C	T	0.477941	F0-657	nuclear_transfor_step	fix	intron_variant	MODIFIER	DOCK3	ENSSSCG00000011416	snv
	13	35326549	C	T	0.235294	F0-657	edited_step	fix	downstream_gene_variant	MODIFIER	PRKCD	ENSSSCG00000023503	snv
	13	37570828	T	C	0.419753	F0-657	edited_step	fix	intron_variant	MODIFIER	ERC2	ENSSSCG00000024417	snv
	13	37813512	C	A	0.0588235	F0-657	edited_step	fix	intron_variant	MODIFIER	ERC2	ENSSSCG00000024417	snv
	13	37898815	C	T	0.479167	F0-657	nuclear_transfor_step	fix	intron_variant	MODIFIER	ERC2	ENSSSCG00000024417	snv
	13	39244651	C	T	0.557692	F0-657	edited_step	fix	intron_variant	MODIFIER	ENSSSCG00000020990	ENSSSCG00000020990	snv
	13	46243004	A	G	0.285714	F0-657	edited_step	fix	intron_variant	MODIFIER	ENSSSCG00000050584	ENSSSCG00000050584	snv
	13	48867248	A	C	0.453608	F0-657	edited_step	fix	intron_variant	MODIFIER	SUCLG2	ENSSSCG00000011501	snv
	13	49028724	G	C	0.267442	F0-657	edited_step	fix	intron_variant	MODIFIER	SUCLG2	ENSSSCG00000011501	snv
	13	49722830	G	A	0.00990099	F0-657	edited_step	fix	intron_variant	MODIFIER	TAFA1	ENSSSCG00000042118	snv
	13	49928114	T	C	0.466667	F0-657	edited_step	fix	intron_variant	MODIFIER	TAFA1	ENSSSCG00000042118	snv
	13	50249657	T	C	0.56701	F0-657	nuclear_transfor_step	fix	intron_variant	MODIFIER	TAFA4	ENSSSCG00000033199	snv
	13	50878513	A	G	0.471264	F0-657	edited_step	fix	intergenic_region	MODIFIER	ENSSSCG00000050105-ENSSSCG00000049295	ENSSSCG00000050105-ENSSSCG00000049295	snv
	13	55007495	C	T	0.415094	F0-657	nuclear_transfor_step	fix	intergenic_region	MODIFIER	PDZRN3-ENSSSCG00000048446	ENSSSCG00000011521-ENSSSCG00000048446	snv
	13	57211563	T	G	0.553719	F0-657	edited_step	fix	intergenic_region	MODIFIER	CHL1-CNTN6	ENSSSCG00000011524-ENSSSCG00000038152	snv
	13	57913986	T	G	0.00925926	F0-657	edited_step	fix	intron_variant	MODIFIER	CNTN6	ENSSSCG00000038152	snv
	13	58383701	G	C	0.00917431	F0-657	edited_step	fix	intergenic_region	MODIFIER	ENSSSCG00000048689-U6	ENSSSCG00000048689-ENSSSCG00000018941	snv
	13	59579362	G	T	0.433628	F0-657	edited_step	fix	intron_variant	MODIFIER	CNTN4	ENSSSCG00000011527	snv
	13	59738761	T	C	0.439024	F0-657	edited_step	fix	upstream_gene_variant	MODIFIER	U2	ENSSSCG00000028732	snv
	13	59876274	C	T	0.515152	F0-657	nuclear_transfor_step	fix	intergenic_region	MODIFIER	CRBN-ENSSSCG00000047979	ENSSSCG00000011530-ENSSSCG00000047979	snv
	13	60041122	T	C	0.548673	F0-657	edited_step	fix	intergenic_region	MODIFIER	ENSSSCG00000047979-ENSSSCG00000043088	ENSSSCG00000047979-ENSSSCG00000043088	snv
	13	60649527	C	G	0.446043	F0-657	nuclear_transfor_step	fix	upstream_gene_variant	MODIFIER	ENSSSCG00000044711	ENSSSCG00000044711	snv
	13	60880016	T	A	0.580952	F0-657	nuclear_transfor_step	fix	intron_variant	MODIFIER	ENSSSCG00000041465	ENSSSCG00000041465	snv
	13	62088505	C	T	0.489583	F0-657	edited_step	fix	intergenic_region	MODIFIER	ENSSSCG00000047626-ENSSSCG00000041046	ENSSSCG00000047626-ENSSSCG00000041046	snv
	13	63572076	A	C	0.444444	F0-657	nuclear_transfor_step	fix	intron_variant	MODIFIER	GRM7	ENSSSCG00000023891	snv
	13	63638756	G	A	0.444444	F0-657	edited_step	fix	intron_variant	MODIFIER	GRM7	ENSSSCG00000023891	snv
	13	65401127	G	A	0.266667	F0-657	edited_step	fix	splice_region_variant&synonymous_variant	LOW	SRGAP3	ENSSSCG00000033624	snv
	13	72987031	C	A	0.4375	F0-657	edited_step	fix	intergenic_region	MODIFIER	ENSSSCG00000046630-PLXNA1	ENSSSCG00000046630-ENSSSCG00000024001	snv
	13	77800401	C	T	0.474747	F0-657	nuclear_transfor_step	fix	intron_variant	MODIFIER	STAG1	ENSSSCG00000011652	snv
	13	86415352	C	A	0.488	F0-657	nuclear_transfor_step	fix	missense_variant	MODERATE	PLOD2	ENSSSCG00000011689	snv
	13	87005229	G	T	0.579439	F0-657	nuclear_transfor_step	fix	intergenic_region	MODIFIER	PLSCR5-ENSSSCG00000047889	ENSSSCG00000011691-ENSSSCG00000047889	snv
	13	87421021	T	C	0.489583	F0-657	edited_step	fix	intergenic_region	MODIFIER	ENSSSCG00000047889-ENSSSCG00000042542	ENSSSCG00000047889-ENSSSCG00000042542	snv
	13	88664124	C	A	0.571429	F0-657	edited_step	fix	intergenic_region	MODIFIER	ENSSSCG00000041008-AGTR1	ENSSSCG00000041008-ENSSSCG00000011695	snv
	13	88735454	C	A	0.504587	F0-657	edited_step	fix	intergenic_region	MODIFIER	ENSSSCG00000041008-AGTR1	ENSSSCG00000041008-ENSSSCG00000011695	snv
	13	90424471	G	T	0.598361	F0-657	nuclear_transfor_step	fix	intergenic_region	MODIFIER	PFN2-ENSSSCG00000044605	ENSSSCG00000030260-ENSSSCG00000044605	snv
	13	92607857	C	A	0.605839	F0-657	nuclear_transfor_step	fix	intron_variant	MODIFIER	MBNL1	ENSSSCG00000011720	snv
	13	93402957	C	T	0.364486	F0-657	nuclear_transfor_step	fix	intergenic_region	MODIFIER	RAP2B-ENSSSCG00000046674	ENSSSCG00000038366-ENSSSCG00000046674	snv
	13	101989946	G	T	0.509615	F0-657	edited_step	fix	intergenic_region	MODIFIER	ENSSSCG00000045945-ENSSSCG00000020451	ENSSSCG00000045945-ENSSSCG00000020451	snv
	13	102219081	C	A	0.435644	F0-657	edited_step	fix	intergenic_region	MODIFIER	ENSSSCG00000045945-ENSSSCG00000020451	ENSSSCG00000045945-ENSSSCG00000020451	snv
	13	102336191	G	A	0.478723	F0-657	edited_step	fix	intergenic_region	MODIFIER	ENSSSCG00000045945-ENSSSCG00000020451	ENSSSCG00000045945-ENSSSCG00000020451	snv
	13	102533157	C	T	0.510638	F0-657	edited_step	fix	intergenic_region	MODIFIER	ENSSSCG00000045945-ENSSSCG00000020451	ENSSSCG00000045945-ENSSSCG00000020451	snv
	13	103279489	A	G	0.605263	F0-657	edited_step	fix	intergenic_region	MODIFIER	ENSSSCG00000045945-ENSSSCG00000020451	ENSSSCG00000045945-ENSSSCG00000020451	snv
	13	103353925	A	T	0.524272	F0-657	edited_step	fix	intergenic_region	MODIFIER	ENSSSCG00000045945-ENSSSCG00000020451	ENSSSCG00000045945-ENSSSCG00000020451	snv
	13	105420485	G	A	0.511111	F0-657	edited_step	fix	intergenic_region	MODIFIER	ENSSSCG00000033350-ZBBX	ENSSSCG00000033350-ENSSSCG00000023393	snv
	13	107133270	A	T	0.520325	F0-657	nuclear_transfor_step	fix	intergenic_region	MODIFIER	GOLIM4-ENSSSCG00000035525	ENSSSCG00000011741-ENSSSCG00000035525	snv
	13	107929893	C	A	0.491525	F0-657	edited_step	fix	intron_variant	MODIFIER	MECOM	ENSSSCG00000011743	snv
	13	108103003	C	A	0.365385	F0-657	nuclear_transfor_step	fix	intron_variant	MODIFIER	MECOM	ENSSSCG00000011743	snv
	13	109195824	C	T	0.473684	F0-657	edited_step	fix	intron_variant	MODIFIER	SLC7A14	ENSSSCG00000011748	snv
	13	110219268	T	A	0.587302	F0-657	nuclear_transfor_step	fix	intron_variant	MODIFIER	PLD1	ENSSSCG00000011750	snv
	13	113452839	T	G	0.430108	F0-657	edited_step	fix	intron_variant	MODIFIER	NAALADL2	ENSSSCG00000023871	snv
	13	113579188	G	A	0.464286	F0-657	nuclear_transfor_step	fix	intron_variant	MODIFIER	NAALADL2	ENSSSCG00000023871	snv
	13	119655255	A	C	0.540984	F0-657	nuclear_transfor_step	fix	upstream_gene_variant	MODIFIER	ENSSSCG00000051441	ENSSSCG00000051441	snv
	13	120049565	T	C	0.056	F0-657	edited_step	fix	intergenic_region	MODIFIER	ENSSSCG00000041424-ENSSSCG00000037596	ENSSSCG00000041424-ENSSSCG00000037596	snv
	13	121533164	G	A	0.0178571	F0-657	isolation_step	fix	intergenic_region	MODIFIER	ENSSSCG00000031476-ENSSSCG00000050978	ENSSSCG00000031476-ENSSSCG00000050978	snv
	13	128406196	G	C	0.51	F0-657	edited_step	fix	intergenic_region	MODIFIER	ENSSSCG00000043779-OSTN	ENSSSCG00000043779-ENSSSCG00000031478	snv
	13	134807671	T	A	0.242424	F0-657	edited_step	fix	downstream_gene_variant	MODIFIER	OSBPL11	ENSSSCG00000026753	snv
	13	136807676	C	T	0.460784	F0-657	edited_step	fix	missense_variant	MODERATE	MYLK	ENSSSCG00000011867	snv
	13	136860607	G	T	0.625	F0-657	edited_step	fix	intron_variant	MODIFIER	HACD2	ENSSSCG00000034786	snv
	13	137193009	G	A	0.463235	F0-657	nuclear_transfor_step	fix	intron_variant	MODIFIER	SEC22A	ENSSSCG00000024904	snv
	13	137929900	T	C	0.43	F0-657	nuclear_transfor_step	fix	intron_variant	MODIFIER	ENSSSCG00000011875	ENSSSCG00000011875	snv
	13	141272325	T	A	0.0194175	F0-657	isolation_step	fix	intron_variant	MODIFIER	IGSF11	ENSSSCG00000011906	snv
	13	142821234	A	C	0.505495	F0-657	nuclear_transfor_step	fix	intergenic_region	MODIFIER	ENSSSCG00000036627-ENSSSCG00000044822	ENSSSCG00000036627-ENSSSCG00000044822	snv
	13	142857586	C	A	0.506849	F0-657	edited_step	fix	intergenic_region	MODIFIER	ENSSSCG00000036627-ENSSSCG00000044822	ENSSSCG00000036627-ENSSSCG00000044822	snv
	13	147400821	C	A	0.0897436	F0-657	edited_step	fix	intergenic_region	MODIFIER	ENSSSCG00000011931-ENSSSCG00000041735	ENSSSCG00000011931-ENSSSCG00000041735	snv
	13	147415003	C	A	0.578512	F0-657	nuclear_transfor_step	fix	upstream_gene_variant	MODIFIER	ENSSSCG00000041735	ENSSSCG00000041735	snv
	13	147992069	G	C	0.468085	F0-657	edited_step	fix	intron_variant	MODIFIER	PHLDB2	ENSSSCG00000022081	snv
	13	148389528	T	A	0.188235	F0-657	edited_step	fix	intergenic_region	MODIFIER	CD96-NECTIN3	ENSSSCG00000023993-ENSSSCG00000011933	snv
	13	149146486	G	T	0.505263	F0-657	edited_step	fix	intergenic_region	MODIFIER	ENSSSCG00000049678-ENSSSCG00000048592	ENSSSCG00000049678-ENSSSCG00000048592	snv
	13	150100964	C	A	0.469027	F0-657	nuclear_transfor_step	fix	intergenic_region	MODIFIER	ENSSSCG00000019991-ENSSSCG00000048620	ENSSSCG00000019991-ENSSSCG00000048620	snv
	13	150113999	C	T	0.582278	F0-657	edited_step	fix	upstream_gene_variant	MODIFIER	ENSSSCG00000048620	ENSSSCG00000048620	snv
	13	151452565	T	A	0.370787	F0-657	nuclear_transfor_step	fix	intron_variant	MODIFIER	CD47	ENSSSCG00000011942	snv
	13	151458532	A	G	0.536585	F0-657	nuclear_transfor_step	fix	intron_variant	MODIFIER	CD47	ENSSSCG00000011942	snv
	13	151467323	A	T	0.545455	F0-657	nuclear_transfor_step	fix	intron_variant	MODIFIER	CD47	ENSSSCG00000011942	snv
	13	154066958	G	T	0.478992	F0-657	edited_step	fix	upstream_gene_variant	MODIFIER	ENSSSCG00000041691	ENSSSCG00000041691	snv
	13	154266255	G	C	0.54717	F0-657	nuclear_transfor_step	fix	intergenic_region	MODIFIER	ENSSSCG00000041691-ENSSSCG00000051613	ENSSSCG00000041691-ENSSSCG00000051613	snv
	13	154484337	T	G	0.0104167	F0-657	isolation_step	fix	upstream_gene_variant	MODIFIER	ENSSSCG00000042207	ENSSSCG00000042207	snv
	13	154741390	T	G	0.446429	F0-657	edited_step	fix	intergenic_region	MODIFIER	ENSSSCG00000035590-ENSSSCG00000043607	ENSSSCG00000035590-ENSSSCG00000043607	snv
	13	159559319	T	C	0.55914	F0-657	edited_step	fix	intron_variant	MODIFIER	ENSSSCG00000039367	ENSSSCG00000039367	snv
	13	160986332	A	G	0.439024	F0-657	nuclear_transfor_step	fix	intergenic_region	MODIFIER	ENSSSCG00000042338-OR5K4	ENSSSCG00000042338-ENSSSCG00000011986	snv
	13	161630692	A	G	0.55102	F0-657	edited_step	fix	intergenic_region	MODIFIER	ENSSSCG00000032817-ENSSSCG00000051461	ENSSSCG00000032817-ENSSSCG00000051461	snv
	13	161732913	A	T	0.571429	F0-657	edited_step	fix	synonymous_variant	LOW	ENSSSCG00000048852	ENSSSCG00000048852	snv
	13	162175101	G	T	0.0120482	F0-657	edited_step	fix	intergenic_region	MODIFIER	ENSSSCG00000050360-ENSSSCG00000038935	ENSSSCG00000050360-ENSSSCG00000038935	snv
	13	163132457	A	T	0.526667	F0-657	nuclear_transfor_step	fix	intron_variant	MODIFIER	EPHA6	ENSSSCG00000033898	snv
	13	163760248	T	G	0.429907	F0-657	edited_step	fix	intergenic_region	MODIFIER	EPHA6-U6	ENSSSCG00000033898-ENSSSCG00000026634	snv
	13	166359067	T	G	0.508929	F0-657	edited_step	fix	intergenic_region	MODIFIER	ENSSSCG00000041110-EPHA3	ENSSSCG00000041110-ENSSSCG00000026130	snv
	13	168304612	G	A	0.550459	F0-657	nuclear_transfor_step	fix	intergenic_region	MODIFIER	ENSSSCG00000044900-POU1F1	ENSSSCG00000044900-ENSSSCG00000011996	snv
	13	171454399	A	T	0.043956	F0-657	edited_step	fix	intergenic_region	MODIFIER	CADM2-ENSSSCG00000049210	ENSSSCG00000011999-ENSSSCG00000049210	snv
	13	174837092	A	T	0.468531	F0-657	nuclear_transfor_step	fix	intergenic_region	MODIFIER	ENSSSCG00000047842-ENSSSCG00000051053	ENSSSCG00000047842-ENSSSCG00000051053	snv
	13	177923999	A	G	0.509615	F0-657	edited_step	fix	intron_variant	MODIFIER	ROBO2	ENSSSCG00000012002	snv
	13	179018814	A	C	0.544	F0-657	edited_step	fix	intergenic_region	MODIFIER	ROBO2-LIPI	ENSSSCG00000012002-ENSSSCG00000012004	snv
	13	180098581	G	T	0.573913	F0-657	edited_step	fix	intergenic_region	MODIFIER	ENSSSCG00000051785-ENSSSCG00000051574	ENSSSCG00000051785-ENSSSCG00000051574	snv
	13	180740870	A	C	0.454545	F0-657	edited_step	fix	intergenic_region	MODIFIER	USP25-ENSSSCG00000043443	ENSSSCG00000024623-ENSSSCG00000043443	snv
	13	182598388	G	C	0.551402	F0-657	edited_step	fix	intron_variant	MODIFIER	CHODL	ENSSSCG00000012018	snv
	13	183854976	G	A	0.545455	F0-657	nuclear_transfor_step	fix	intergenic_region	MODIFIER	ENSSSCG00000045802-ENSSSCG00000038421	ENSSSCG00000045802-ENSSSCG00000038421	snv
	13	183883475	T	G	0.0674157	F0-657	edited_step	fix	intergenic_region	MODIFIER	ENSSSCG00000045802-ENSSSCG00000038421	ENSSSCG00000045802-ENSSSCG00000038421	snv
	13	183975854	A	C	0.494737	F0-657	edited_step	fix	intergenic_region	MODIFIER	ENSSSCG00000045802-ENSSSCG00000038421	ENSSSCG00000045802-ENSSSCG00000038421	snv
	13	184390904	T	A	0.446281	F0-657	edited_step	fix	intron_variant	MODIFIER	ENSSSCG00000038421	ENSSSCG00000038421	snv
	13	185264190	C	T	0.461538	F0-657	nuclear_transfor_step	fix	intron_variant	MODIFIER	NCAM2	ENSSSCG00000012020	snv
	13	185660406	A	G	0.516129	F0-657	nuclear_transfor_step	fix	intron_variant	MODIFIER	NCAM2	ENSSSCG00000012020	snv
	13	186604222	A	C	0.419847	F0-657	edited_step	fix	intergenic_region	MODIFIER	U6-ENSSSCG00000047308	ENSSSCG00000018744-ENSSSCG00000047308	snv
	13	187450690	T	A	0.538462	F0-657	edited_step	fix	intergenic_region	MODIFIER	ENSSSCG00000047308-ENSSSCG00000050420	ENSSSCG00000047308-ENSSSCG00000050420	snv
	13	187810977	G	A	0.493333	F0-657	edited_step	fix	intergenic_region	MODIFIER	ENSSSCG00000047308-ENSSSCG00000050420	ENSSSCG00000047308-ENSSSCG00000050420	snv
	13	189513631	T	C	0.46729	F0-657	edited_step	fix	intron_variant	MODIFIER	APP	ENSSSCG00000012022	snv
	13	189821590	A	T	0.572727	F0-657	nuclear_transfor_step	fix	intergenic_region	MODIFIER	ENSSSCG00000049279-U6	ENSSSCG00000049279-ENSSSCG00000033431	snv
	13	194955590	A	G	0.518519	F0-657	nuclear_transfor_step	fix	intron_variant	MODIFIER	TIAM1	ENSSSCG00000012034	snv
	13	198937409	C	T	0.468085	F0-657	edited_step	fix	intergenic_region	MODIFIER	ENSSSCG00000041276-ENSSSCG00000036894	ENSSSCG00000041276-ENSSSCG00000036894	snv
	13	201054074	A	G	0.516129	F0-657	nuclear_transfor_step	fix	intron_variant	MODIFIER	DYRK1A	ENSSSCG00000030480	snv
	13	201865502	C	A	0.015873	F0-657	isolation_step	fix	intergenic_region	MODIFIER	SNORA72-KCNJ15	ENSSSCG00000019614-ENSSSCG00000012066	snv
	13	201933019	C	T	0.168421	F0-657	edited_step	fix	intron_variant	MODIFIER	KCNJ15	ENSSSCG00000012066	snv
	13	203925395	G	T	0.265487	F0-657	edited_step	fix	intron_variant	MODIFIER	DSCAM	ENSSSCG00000012072	snv
	13	203943423	A	G	0.488636	F0-657	edited_step	fix	intron_variant	MODIFIER	DSCAM	ENSSSCG00000012072	snv
	14	1881010	A	C	0.381356	F0-657	edited_step	fix	intergenic_region	MODIFIER	U6-DIRAS2	ENSSSCG00000034850-ENSSSCG00000031694	snv
	14	5156243	T	C	0.513158	F0-657	nuclear_transfor_step	fix	intergenic_region	MODIFIER	ENSSSCG00000042031-ENSSSCG00000018795	ENSSSCG00000042031-ENSSSCG00000018795	snv
	14	5251549	A	G	0.473684	F0-657	nuclear_transfor_step	fix	intergenic_region	MODIFIER	ENSSSCG00000042031-ENSSSCG00000018795	ENSSSCG00000042031-ENSSSCG00000018795	snv
	14	8772196	C	T	0.00757576	F0-657	edited_step	fix	intron_variant	MODIFIER	ENSSSCG00000049065	ENSSSCG00000049065	snv
	14	11075807	A	G	0.0555556	F0-657	edited_step	fix	intron_variant	MODIFIER	PTK2B	ENSSSCG00000009664	snv
	14	17600940	G	A	0.42	F0-657	edited_step	fix	intron_variant	MODIFIER	GALNTL6	ENSSSCG00000021805	snv
	14	18801407	T	G	0.557895	F0-657	nuclear_transfor_step	fix	intergenic_region	MODIFIER	ENSSSCG00000044025-ENSSSCG00000042965	ENSSSCG00000044025-ENSSSCG00000042965	snv
	14	20346635	T	C	0.047619	F0-657	edited_step	fix	intergenic_region	MODIFIER	NEK1-SH3RF1	ENSSSCG00000009714-ENSSSCG00000009716	snv
	14	20673689	C	A	0.461538	F0-657	nuclear_transfor_step	fix	downstream_gene_variant	MODIFIER	PALLD	ENSSSCG00000029331	snv
	14	22229816	A	G	0.514563	F0-657	nuclear_transfor_step	fix	intergenic_region	MODIFIER	SPOCK3-ENSSSCG00000050278	ENSSSCG00000009722-ENSSSCG00000050278	snv
	14	25206894	A	G	0.481203	F0-657	nuclear_transfor_step	fix	upstream_gene_variant	MODIFIER	ENSSSCG00000038306	ENSSSCG00000038306	snv
	14	25982554	C	T	0.565217	F0-657	edited_step	fix	intron_variant	MODIFIER	ENSSSCG00000033067	ENSSSCG00000033067	snv
	14	26371015	G	T	0.412844	F0-657	nuclear_transfor_step	fix	intron_variant	MODIFIER	TMEM132C	ENSSSCG00000009753	snv
	14	28462616	G	T	0.43956	F0-657	edited_step	fix	intergenic_region	MODIFIER	SCARB1-ENSSSCG00000043135	ENSSSCG00000009759-ENSSSCG00000043135	snv
	14	28714685	C	T	0.520661	F0-657	nuclear_transfor_step	fix	intron_variant	MODIFIER	NCOR2	ENSSSCG00000009761	snv
	14	31005302	C	T	0.622642	F0-657	edited_step	fix	intron_variant	MODIFIER	MORN3	ENSSSCG00000009809	snv
	14	35829838	T	C	0.472527	F0-657	edited_step	fix	intron_variant	MODIFIER	C12orf49	ENSSSCG00000035873	snv
	14	38912061	C	T	0.514286	F0-657	edited_step	fix	intron_variant	MODIFIER	RPH3A	ENSSSCG00000009883	snv
	14	38966083	A	C	0.527473	F0-657	edited_step	fix	intron_variant	MODIFIER	RPH3A	ENSSSCG00000009883	snv
	14	41013103	A	C	0.157303	F0-657	edited_step	fix	intron_variant	MODIFIER	GIT2	ENSSSCG00000009925	snv
	14	41626288	T	C	0.0916031	F0-657	edited_step	fix	intergenic_region	MODIFIER	ENSSSCG00000009936-ENSSSCG00000045048	ENSSSCG00000009936-ENSSSCG00000045048	snv
	14	44121305	G	T	0.0275229	F0-657	edited_step	fix	downstream_gene_variant	MODIFIER	TPST2	ENSSSCG00000009963	snv
	14	52485760	C	A	0.425373	F0-657	nuclear_transfor_step	fix	intergenic_region	MODIFIER	ENSSSCG00000050944-ENSSSCG00000041314	ENSSSCG00000050944-ENSSSCG00000041314	snv
	14	52880108	G	A	0.551402	F0-657	edited_step	fix	intergenic_region	MODIFIER	ENSSSCG00000050944-ENSSSCG00000041314	ENSSSCG00000050944-ENSSSCG00000041314	snv
	14	53432883	A	C	0.019802	F0-657	isolation_step	fix	intergenic_region	MODIFIER	ENSSSCG00000046944-ENSSSCG00000051722	ENSSSCG00000046944-ENSSSCG00000051722	snv
	14	57782013	T	A	0.3875	F0-657	edited_step	fix	intron_variant	MODIFIER	ENSSSCG00000049255	ENSSSCG00000049255	snv
	14	63868898	A	C	0.582418	F0-657	nuclear_transfor_step	fix	intron_variant	MODIFIER	ENSSSCG00000010212	ENSSSCG00000010212	snv
	14	67311198	C	A	0.0693069	F0-657	edited_step	fix	intron_variant	MODIFIER	ENSSSCG00000050004	ENSSSCG00000050004	snv
	14	68555433	T	C	0.495726	F0-657	nuclear_transfor_step	fix	intergenic_region	MODIFIER	ENSSSCG00000046347-ENSSSCG00000041188	ENSSSCG00000046347-ENSSSCG00000041188	snv
	14	69206818	T	G	0.537037	F0-657	edited_step	fix	intron_variant	MODIFIER	CTNNA3	ENSSSCG00000036480	snv
	14	69300325	C	A	0.012987	F0-657	isolation_step	fix	intron_variant	MODIFIER	CTNNA3	ENSSSCG00000036480	snv
	14	69334115	A	C	0.612245	F0-657	edited_step	fix	downstream_gene_variant	MODIFIER	U6	ENSSSCG00000035888	snv
	14	70548110	T	G	0.541667	F0-657	edited_step	fix	intron_variant	MODIFIER	CTNNA3	ENSSSCG00000036480	snv
	14	71159879	T	A	0.456693	F0-657	edited_step	fix	3_prime_UTR_variant	MODIFIER	HERC4	ENSSSCG00000038913	snv
	14	78605353	G	A	0.496815	F0-657	nuclear_transfor_step	fix	intron_variant	MODIFIER	LRMDA	ENSSSCG00000034308	snv
	14	78612313	G	C	0.503546	F0-657	nuclear_transfor_step	fix	intron_variant	MODIFIER	LRMDA	ENSSSCG00000034308	snv
	14	80542076	G	T	0.504854	F0-657	edited_step	fix	intron_variant	MODIFIER	ENSSSCG00000039544	ENSSSCG00000039544	snv
	14	83064902	C	G	0.514286	F0-657	edited_step	fix	intergenic_region	MODIFIER	ENSSSCG00000051331-NRG3	ENSSSCG00000051331-ENSSSCG00000010344	snv
	14	83284047	C	A	0.592593	F0-657	edited_step	fix	intergenic_region	MODIFIER	ENSSSCG00000051331-NRG3	ENSSSCG00000051331-ENSSSCG00000010344	snv
	14	83457602	T	C	0.556701	F0-657	edited_step	fix	intron_variant	MODIFIER	NRG3	ENSSSCG00000010344	snv
	14	83918162	G	T	0.458333	F0-657	edited_step	fix	downstream_gene_variant	MODIFIER	ENSSSCG00000044471	ENSSSCG00000044471	snv
	14	83954512	G	C	0.504202	F0-657	nuclear_transfor_step	fix	intron_variant	MODIFIER	NRG3	ENSSSCG00000010344	snv
	14	86032558	C	A	0.538462	F0-657	edited_step	fix	intron_variant	MODIFIER	ENSSSCG00000046576	ENSSSCG00000046576	snv
	14	90086323	A	G	0.394366	F0-657	edited_step	fix	intergenic_region	MODIFIER	ERCC6-SLC18A3	ENSSSCG00000010391-ENSSSCG00000022274	snv
	14	91502006	C	A	0.345679	F0-657	edited_step	fix	intergenic_region	MODIFIER	ENSSSCG00000047278-CXCL12	ENSSSCG00000047278-ENSSSCG00000034973	snv
	14	94319768	T	C	0.49505	F0-657	nuclear_transfor_step	fix	intergenic_region	MODIFIER	ENSSSCG00000047077-ENSSSCG00000050931	ENSSSCG00000047077-ENSSSCG00000050931	snv
	14	94579073	G	C	0.528926	F0-657	nuclear_transfor_step	fix	intergenic_region	MODIFIER	ENSSSCG00000047077-ENSSSCG00000050931	ENSSSCG00000047077-ENSSSCG00000050931	snv
	14	97786892	C	A	0.00884956	F0-657	isolation_step	fix	intron_variant	MODIFIER	PRKG1	ENSSSCG00000010429	snv
	14	98158722	T	A	0.430233	F0-657	nuclear_transfor_step	fix	intron_variant	MODIFIER	PRKG1	ENSSSCG00000010429	snv
	14	98267294	T	C	0.541667	F0-657	nuclear_transfor_step	fix	intron_variant	MODIFIER	PRKG1	ENSSSCG00000010429	snv
	14	98296738	G	A	0.539683	F0-657	nuclear_transfor_step	fix	intron_variant	MODIFIER	PRKG1	ENSSSCG00000010429	snv
	14	106335710	G	T	0.509804	F0-657	nuclear_transfor_step	fix	intron_variant	MODIFIER	CYP2C42	ENSSSCG00000035347	snv
	14	111960037	G	A	0.622642	F0-657	edited_step	fix	intergenic_region	MODIFIER	PAX2-ENSSSCG00000038321	ENSSSCG00000010556-ENSSSCG00000038321	snv
	14	112638068	A	G	0.433735	F0-657	edited_step	fix	downstream_gene_variant	MODIFIER	DPCD	ENSSSCG00000010565	snv
	14	116068451	G	A	0.278261	F0-657	edited_step	fix	intron_variant	MODIFIER	SORCS3	ENSSSCG00000010617	snv
	14	116800966	T	C	0.468085	F0-657	edited_step	fix	intergenic_region	MODIFIER	U8-U6	ENSSSCG00000018956-ENSSSCG00000020604	snv
	14	121770513	G	T	0.376	F0-657	edited_step	fix	intron_variant	MODIFIER	ENSSSCG00000042781	ENSSSCG00000042781	snv
	14	122329518	T	C	0.435374	F0-657	nuclear_transfor_step	fix	intergenic_region	MODIFIER	ENSSSCG00000041222-ENSSSCG00000046091	ENSSSCG00000041222-ENSSSCG00000046091	snv
	14	125948850	A	G	0.508621	F0-657	nuclear_transfor_step	fix	intron_variant	MODIFIER	ATRNL1	ENSSSCG00000010654	snv
	14	129104205	T	A	0.417323	F0-657	nuclear_transfor_step	fix	intergenic_region	MODIFIER	PRDX3-GRK5	ENSSSCG00000010682-ENSSSCG00000010683	snv
	14	131682086	G	T	0.019802	F0-657	edited_step	fix	intron_variant	MODIFIER	TACC2	ENSSSCG00000037530	snv
	14	131843579	C	T	0.507576	F0-657	nuclear_transfor_step	fix	intron_variant	MODIFIER	TACC2	ENSSSCG00000037530	snv
	14	132427034	G	A	0.010101	F0-657	isolation_step	fix	intron_variant	MODIFIER	ENSSSCG00000049267	ENSSSCG00000049267	snv
	14	136035668	G	A	0.495238	F0-657	edited_step	fix	intergenic_region	MODIFIER	C10orf90-DOCK1	ENSSSCG00000010747-ENSSSCG00000035045	snv
	14	137723623	C	T	0.06	F0-657	edited_step	fix	intergenic_region	MODIFIER	ENSSSCG00000044117-ENSSSCG00000041206	ENSSSCG00000044117-ENSSSCG00000041206	snv
	14	138118029	C	G	0.535714	F0-657	edited_step	fix	intergenic_region	MODIFIER	ENSSSCG00000044543-ENSSSCG00000048068	ENSSSCG00000044543-ENSSSCG00000048068	snv
	14	138243307	A	C	0.455556	F0-657	edited_step	fix	intergenic_region	MODIFIER	ENSSSCG00000044543-ENSSSCG00000048068	ENSSSCG00000044543-ENSSSCG00000048068	snv
	14	139733708	C	T	0.450704	F0-657	edited_step	fix	intergenic_region	MODIFIER	ENSSSCG00000050993-TCERG1L	ENSSSCG00000050993-ENSSSCG00000037698	snv
	14	139802676	G	A	0.559322	F0-657	edited_step	fix	intron_variant	MODIFIER	TCERG1L	ENSSSCG00000037698	snv
	14	140125465	G	A	0.571429	F0-657	edited_step	fix	intergenic_region	MODIFIER	ENSSSCG00000047025-ENSSSCG00000027988	ENSSSCG00000047025-ENSSSCG00000027988	snv
	14	140125548	T	C	0.504425	F0-657	edited_step	fix	intergenic_region	MODIFIER	ENSSSCG00000047025-ENSSSCG00000027988	ENSSSCG00000047025-ENSSSCG00000027988	snv
	14	140726757	C	G	0.491525	F0-657	edited_step	fix	intergenic_region	MODIFIER	ENSSSCG00000041379-ENSSSCG00000046058	ENSSSCG00000041379-ENSSSCG00000046058	snv
	14	141358074	T	C	0.618421	F0-657	edited_step	fix	upstream_gene_variant	MODIFIER	ENSSSCG00000040586	ENSSSCG00000040586	snv
	15	1269433	G	C	0.020202	F0-657	edited_step	fix	intergenic_region	MODIFIER	ENSSSCG00000047776-ENSSSCG00000047930	ENSSSCG00000047776-ENSSSCG00000047930	snv
	15	1460607	C	A	0.5	F0-657	edited_step	fix	intergenic_region	MODIFIER	ENSSSCG00000047776-ENSSSCG00000047930	ENSSSCG00000047776-ENSSSCG00000047930	snv
	15	2705523	A	C	0.508621	F0-657	edited_step	fix	upstream_gene_variant	MODIFIER	ENSSSCG00000044919	ENSSSCG00000044919	snv
	15	3031276	A	C	0.553846	F0-657	edited_step	fix	intron_variant	MODIFIER	ENSSSCG00000045927	ENSSSCG00000045927	snv
	15	9549393	C	T	0.567797	F0-657	edited_step	fix	intergenic_region	MODIFIER	ENSSSCG00000042653-LRP1B	ENSSSCG00000042653-ENSSSCG00000023746	snv
	15	11243631	T	G	0.583333	F0-657	edited_step	fix	intron_variant	MODIFIER	LRP1B	ENSSSCG00000023746	snv
	15	11397090	G	A	0.608	F0-657	edited_step	fix	intron_variant	MODIFIER	LRP1B	ENSSSCG00000023746	snv
	15	11419104	A	G	0.431818	F0-657	edited_step	fix	intron_variant	MODIFIER	LRP1B	ENSSSCG00000023746	snv
	15	12177393	A	C	0.444444	F0-657	nuclear_transfor_step	fix	intergenic_region	MODIFIER	ENSSSCG00000047966-ENSSSCG00000047486	ENSSSCG00000047966-ENSSSCG00000047486	snv
	15	12733426	T	C	0.342342	F0-657	nuclear_transfor_step	fix	intergenic_region	MODIFIER	U6-U6	ENSSSCG00000018499-ENSSSCG00000032571	snv
	15	12796443	T	G	0.527132	F0-657	edited_step	fix	intergenic_region	MODIFIER	U6-NXPH2	ENSSSCG00000032571-ENSSSCG00000040715	snv
	15	12834694	G	T	0.647059	F0-657	edited_step	fix	intergenic_region	MODIFIER	U6-NXPH2	ENSSSCG00000032571-ENSSSCG00000040715	snv
	15	14887717	G	T	0.213483	F0-657	edited_step	fix	intron_variant	MODIFIER	THSD7B	ENSSSCG00000040172	snv
	15	15286848	G	T	0.380597	F0-657	nuclear_transfor_step	fix	intergenic_region	MODIFIER	ENSSSCG00000045566-ENSSSCG00000049669	ENSSSCG00000045566-ENSSSCG00000049669	snv
	15	15605208	C	T	0.0215054	F0-657	edited_step	fix	upstream_gene_variant	MODIFIER	ENSSSCG00000049669	ENSSSCG00000049669	snv
	15	15846155	A	G	0.53012	F0-657	edited_step	fix	intron_variant	MODIFIER	DARS1	ENSSSCG00000015689	snv
	15	18543993	C	A	0.524752	F0-657	edited_step	fix	intron_variant	MODIFIER	ENSSSCG00000041827	ENSSSCG00000041827	snv
	15	19064210	T	A	0.495868	F0-657	nuclear_transfor_step	fix	intron_variant	MODIFIER	ENSSSCG00000023479	ENSSSCG00000023479	snv
	15	19124732	G	T	0.555556	F0-657	edited_step	fix	intron_variant	MODIFIER	ENSSSCG00000023479	ENSSSCG00000023479	snv
	15	19346163	C	A	0.405405	F0-657	nuclear_transfor_step	fix	downstream_gene_variant	MODIFIER	ENSSSCG00000051761	ENSSSCG00000051761	snv
	15	19361341	A	T	0.516949	F0-657	edited_step	fix	intron_variant	MODIFIER	ENSSSCG00000023479	ENSSSCG00000023479	snv
	15	21125712	C	G	0.449153	F0-657	edited_step	fix	intron_variant	MODIFIER	DPP10	ENSSSCG00000015711	snv
	15	21539641	T	C	0.523077	F0-657	nuclear_transfor_step	fix	intron_variant	MODIFIER	DPP10	ENSSSCG00000015711	snv
	15	23660489	A	C	0.333333	F0-657	edited_step	fix	intergenic_region	MODIFIER	CCDC93-INSIG2	ENSSSCG00000015714-ENSSSCG00000036229	snv
	15	23660511	T	C	0.305556	F0-657	edited_step	fix	intergenic_region	MODIFIER	CCDC93-INSIG2	ENSSSCG00000015714-ENSSSCG00000036229	snv
	15	24435260	A	C	0.0410959	F0-657	edited_step	fix	intergenic_region	MODIFIER	EN1-MARCO	ENSSSCG00000015715-ENSSSCG00000015716	snv
	15	26146054	A	T	0.475248	F0-657	edited_step	fix	intergenic_region	MODIFIER	ENSSSCG00000026916-ENSSSCG00000042495	ENSSSCG00000026916-ENSSSCG00000042495	snv
	15	26598211	A	C	0.0428571	F0-657	edited_step	fix	intergenic_region	MODIFIER	ENSSSCG00000042495-ENSSSCG00000049795	ENSSSCG00000042495-ENSSSCG00000049795	snv
	15	27016559	T	G	0.5	F0-657	nuclear_transfor_step	fix	intron_variant	MODIFIER	CNTNAP5	ENSSSCG00000015726	snv
	15	30083444	C	A	0.404762	F0-657	edited_step	fix	intron_variant	MODIFIER	TFCP2L1	ENSSSCG00000015732	snv
	15	30087916	G	A	0.504348	F0-657	edited_step	fix	intron_variant	MODIFIER	TFCP2L1	ENSSSCG00000015732	snv
	15	35606880	T	G	0.535433	F0-657	nuclear_transfor_step	fix	downstream_gene_variant	MODIFIER	ENSSSCG00000047354	ENSSSCG00000047354	snv
	15	36824849	T	C	0.515873	F0-657	edited_step	fix	intergenic_region	MODIFIER	U6-ENSSSCG00000048823	ENSSSCG00000023144-ENSSSCG00000048823	snv
	15	37700729	T	A	0.581395	F0-657	edited_step	fix	intergenic_region	MODIFIER	MCPH1-ENSSSCG00000050097	ENSSSCG00000015754-ENSSSCG00000050097	snv
	15	37737921	T	A	0.0113636	F0-657	edited_step	fix	upstream_gene_variant	MODIFIER	ENSSSCG00000050097	ENSSSCG00000050097	snv
	15	39737988	T	A	0.482143	F0-657	edited_step	fix	intergenic_region	MODIFIER	ENSSSCG00000049943-ENSSSCG00000043142	ENSSSCG00000049943-ENSSSCG00000043142	snv
	15	40945189	A	C	0.495868	F0-657	nuclear_transfor_step	fix	intergenic_region	MODIFIER	ENSSSCG00000045939-SNORD22	ENSSSCG00000045939-ENSSSCG00000020255	snv
	15	43459236	T	C	0.4375	F0-657	nuclear_transfor_step	fix	intergenic_region	MODIFIER	ENSSSCG00000048815-ENSSSCG00000043095	ENSSSCG00000048815-ENSSSCG00000043095	snv
	15	44511543	A	G	0.130435	F0-657	edited_step	fix	intergenic_region	MODIFIER	DCTD-ENSSSCG00000051286	ENSSSCG00000015775-ENSSSCG00000051286	snv
	15	46339695	G	C	0.545455	F0-657	edited_step	fix	intron_variant	MODIFIER	SNX25	ENSSSCG00000015789	snv
	15	49445163	G	T	0.484848	F0-657	nuclear_transfor_step	fix	upstream_gene_variant	MODIFIER	KCNU1	ENSSSCG00000029131	snv
	15	51168777	G	A	0.0531915	F0-657	edited_step	fix	intergenic_region	MODIFIER	ENSSSCG00000044341-ENSSSCG00000042616	ENSSSCG00000044341-ENSSSCG00000042616	snv
	15	58149612	C	A	0.581197	F0-657	edited_step	fix	intergenic_region	MODIFIER	ENSSSCG00000047295-ENSSSCG00000037219	ENSSSCG00000047295-ENSSSCG00000037219	snv
	15	58319327	C	A	0.518519	F0-657	edited_step	fix	intergenic_region	MODIFIER	ENSSSCG00000037219-ENSSSCG00000049851	ENSSSCG00000037219-ENSSSCG00000049851	snv
	15	59066511	G	C	0.117647	F0-657	edited_step	fix	upstream_gene_variant	MODIFIER	HS6ST1	ENSSSCG00000022197	snv
	15	59489086	A	G	0.409091	F0-657	edited_step	fix	intron_variant	MODIFIER	POLR2D	ENSSSCG00000039230	snv
	15	59886044	C	G	0.415385	F0-657	edited_step	fix	intergenic_region	MODIFIER	U6-ENSSSCG00000035546	ENSSSCG00000021796-ENSSSCG00000035546	snv
	15	60973638	T	G	0.0421053	F0-657	edited_step	fix	intron_variant	MODIFIER	ENSSSCG00000048311	ENSSSCG00000048311	snv
	15	61247562	A	T	0.531746	F0-657	nuclear_transfor_step	fix	intergenic_region	MODIFIER	ENSSSCG00000018460-GALNT13	ENSSSCG00000018460-ENSSSCG00000022671	snv
	15	62772876	T	G	0.52809	F0-657	edited_step	fix	intron_variant	MODIFIER	ENSSSCG00000048898	ENSSSCG00000048898	snv
	15	64382978	T	A	0.021978	F0-657	edited_step	fix	upstream_gene_variant	MODIFIER	CYTIP	ENSSSCG00000029753	snv
	15	66034224	G	T	0.568345	F0-657	nuclear_transfor_step	fix	intron_variant	MODIFIER	ENSSSCG00000015880	ENSSSCG00000015880	snv
	15	66487249	G	T	0.441176	F0-657	edited_step	fix	intron_variant	MODIFIER	BAZ2B	ENSSSCG00000015882	snv
	15	69379166	T	G	0.466667	F0-657	nuclear_transfor_step	fix	intron_variant	MODIFIER	KCNH7	ENSSSCG00000015898	snv
	15	72746130	T	G	0.443396	F0-657	edited_step	fix	downstream_gene_variant	MODIFIER	SCN9A	ENSSSCG00000015913	snv
	15	73023295	A	T	0.505618	F0-657	edited_step	fix	intron_variant	MODIFIER	SCN7A	ENSSSCG00000015914	snv
	15	73330985	A	G	0.0625	F0-657	edited_step	fix	intergenic_region	MODIFIER	SCN7A-XIRP2	ENSSSCG00000015914-ENSSSCG00000015917	snv
	15	76245586	T	G	0.296296	F0-657	edited_step	fix	intron_variant	MODIFIER	UBR3	ENSSSCG00000015940	snv
	15	81498393	G	C	0.451613	F0-657	edited_step	fix	intron_variant	MODIFIER	ENSSSCG00000041478	ENSSSCG00000041478	snv
	15	85941738	C	A	0.114583	F0-657	edited_step	fix	intergenic_region	MODIFIER	ENSSSCG00000043350-UBE2E3	ENSSSCG00000043350-ENSSSCG00000033987	snv
	15	97039884	G	T	0.0113636	F0-657	isolation_step	fix	intergenic_region	MODIFIER	ENSSSCG00000046205-U2	ENSSSCG00000046205-ENSSSCG00000049246	snv
	15	100308693	A	G	0.514286	F0-657	edited_step	fix	intergenic_region	MODIFIER	ENSSSCG00000046779-ENSSSCG00000050075	ENSSSCG00000046779-ENSSSCG00000050075	snv
	15	102790462	T	C	0.455882	F0-657	edited_step	fix	intergenic_region	MODIFIER	U6-SATB2	ENSSSCG00000020256-ENSSSCG00000021657	snv
	15	103539741	G	T	0.00980392	F0-657	edited_step	fix	upstream_gene_variant	MODIFIER	C2orf69	ENSSSCG00000016086	snv
	15	103786353	A	C	0.566929	F0-657	edited_step	fix	intergenic_region	MODIFIER	ENSSSCG00000044773-ENSSSCG00000046548	ENSSSCG00000044773-ENSSSCG00000046548	snv
	15	104569062	T	G	0.55814	F0-657	nuclear_transfor_step	fix	downstream_gene_variant	MODIFIER	ENSSSCG00000016096	ENSSSCG00000016096	snv
	15	105326047	A	G	0.348315	F0-657	edited_step	fix	downstream_gene_variant	MODIFIER	ALS2	ENSSSCG00000016109	snv
	15	106358461	C	T	0.484127	F0-657	nuclear_transfor_step	fix	intron_variant	MODIFIER	ICA1L	ENSSSCG00000016115	snv
	15	114337875	G	A	0.513043	F0-657	nuclear_transfor_step	fix	intron_variant	MODIFIER	ERBB4	ENSSSCG00000016160	snv
	15	114549079	G	C	0.52459	F0-657	nuclear_transfor_step	fix	intron_variant	MODIFIER	ERBB4	ENSSSCG00000016160	snv
	15	114959817	G	T	0.448	F0-657	nuclear_transfor_step	fix	intergenic_region	MODIFIER	ERBB4-ENSSSCG00000037703	ENSSSCG00000016160-ENSSSCG00000037703	snv
	15	115713279	A	C	0.526882	F0-657	edited_step	fix	intergenic_region	MODIFIER	IKZF2-SPAG16	ENSSSCG00000016164-ENSSSCG00000016166	snv
	15	117421833	C	A	0.473684	F0-657	edited_step	fix	5_prime_UTR_variant	MODIFIER	ENSSSCG00000047733	ENSSSCG00000047733	snv
	15	121743850	T	G	0.5375	F0-657	edited_step	fix	intergenic_region	MODIFIER	SLC4A3-U6	ENSSSCG00000022846-ENSSSCG00000018784	snv
	15	122592405	G	C	0.431373	F0-657	edited_step	fix	intergenic_region	MODIFIER	ENSSSCG00000020038-ENSSSCG00000044791	ENSSSCG00000020038-ENSSSCG00000044791	snv
	15	122967171	T	C	0.463768	F0-657	edited_step	fix	intergenic_region	MODIFIER	ENSSSCG00000020038-ENSSSCG00000044791	ENSSSCG00000020038-ENSSSCG00000044791	snv
	15	123380643	G	T	0.109091	F0-657	edited_step	fix	intron_variant	MODIFIER	EPHA4	ENSSSCG00000016230	snv
	15	123906678	C	G	0.530973	F0-657	edited_step	fix	intergenic_region	MODIFIER	ENSSSCG00000035547-PAX3	ENSSSCG00000035547-ENSSSCG00000028418	snv
	15	126526344	G	C	0.485507	F0-657	nuclear_transfor_step	fix	intron_variant	MODIFIER	DOCK10	ENSSSCG00000016237	snv
	15	127148269	T	G	0.513043	F0-657	nuclear_transfor_step	fix	intron_variant	MODIFIER	NYAP2	ENSSSCG00000016239	snv
	15	127762383	T	A	0.564103	F0-657	nuclear_transfor_step	fix	intergenic_region	MODIFIER	ENSSSCG00000046536-ENSSSCG00000044486	ENSSSCG00000046536-ENSSSCG00000044486	snv
	15	129448077	A	C	0.471698	F0-657	nuclear_transfor_step	fix	intron_variant	MODIFIER	SPHKAP	ENSSSCG00000016256	snv
	15	129542996	G	T	0.2	F0-657	edited_step	fix	non_coding_transcript_exon_variant	MODIFIER	U6	ENSSSCG00000033044	snv
	15	130729437	G	T	0.243902	F0-657	edited_step	fix	intron_variant	MODIFIER	DNER	ENSSSCG00000016258	snv
	15	136334647	C	A	0.532258	F0-657	edited_step	fix	intron_variant	MODIFIER	ENSSSCG00000049123	ENSSSCG00000049123	snv
	16	909591	T	G	0.5	F0-657	nuclear_transfor_step	fix	intron_variant	MODIFIER	CTNND2	ENSSSCG00000016780	snv
	16	909603	T	G	0.509091	F0-657	nuclear_transfor_step	fix	intron_variant	MODIFIER	CTNND2	ENSSSCG00000016780	snv
	16	2625127	A	C	0.461538	F0-657	edited_step	fix	intergenic_region	MODIFIER	ENSSSCG00000046966-ENSSSCG00000045255	ENSSSCG00000046966-ENSSSCG00000045255	snv
	16	5498035	A	G	0.208955	F0-657	edited_step	fix	intergenic_region	MODIFIER	MARCHF11-ENSSSCG00000016791	ENSSSCG00000031525-ENSSSCG00000016791	snv
	16	5550288	C	A	0.526882	F0-657	edited_step	fix	upstream_gene_variant	MODIFIER	ENSSSCG00000016791	ENSSSCG00000016791	snv
	16	7621077	A	G	0.585586	F0-657	nuclear_transfor_step	fix	intergenic_region	MODIFIER	ENSSSCG00000051524-ENSSSCG00000043590	ENSSSCG00000051524-ENSSSCG00000043590	snv
	16	7700871	G	T	0.6875	F0-657	edited_step	fix	intergenic_region	MODIFIER	ENSSSCG00000043590-CDH18	ENSSSCG00000043590-ENSSSCG00000026842	snv
	16	7856642	G	T	0.607843	F0-657	nuclear_transfor_step	fix	intergenic_region	MODIFIER	ENSSSCG00000043590-CDH18	ENSSSCG00000043590-ENSSSCG00000026842	snv
	16	8092230	A	C	0.163636	F0-657	edited_step	fix	intron_variant	MODIFIER	CDH18	ENSSSCG00000026842	snv
	16	9195644	A	T	0.490909	F0-657	edited_step	fix	intergenic_region	MODIFIER	ENSSSCG00000043949-ENSSSCG00000047738	ENSSSCG00000043949-ENSSSCG00000047738	snv
	16	10470222	C	A	0.0173913	F0-657	edited_step	fix	intergenic_region	MODIFIER	CDH12-ENSSSCG00000016800	ENSSSCG00000016799-ENSSSCG00000016800	snv
	16	10691331	A	C	0.59292	F0-657	nuclear_transfor_step	fix	intergenic_region	MODIFIER	ENSSSCG00000044561-ENSSSCG00000042836	ENSSSCG00000044561-ENSSSCG00000042836	snv
	16	11124093	C	T	0.560976	F0-657	edited_step	fix	intergenic_region	MODIFIER	ENSSSCG00000046297-ENSSSCG00000050375	ENSSSCG00000046297-ENSSSCG00000050375	snv
	16	11575506	T	A	0.43956	F0-657	edited_step	fix	intergenic_region	MODIFIER	ENSSSCG00000050375-CDH10	ENSSSCG00000050375-ENSSSCG00000016802	snv
	16	13383632	A	C	0.00917431	F0-657	edited_step	fix	intergenic_region	MODIFIER	ENSSSCG00000042931-CDH9	ENSSSCG00000042931-ENSSSCG00000020845	snv
	16	13418172	T	A	0.545455	F0-657	nuclear_transfor_step	fix	intergenic_region	MODIFIER	ENSSSCG00000042931-CDH9	ENSSSCG00000042931-ENSSSCG00000020845	snv
	16	14414741	T	G	0.473684	F0-657	nuclear_transfor_step	fix	intergenic_region	MODIFIER	ENSSSCG00000043773-U6	ENSSSCG00000043773-ENSSSCG00000018997	snv
	16	14547772	A	C	0.521739	F0-657	edited_step	fix	intergenic_region	MODIFIER	ENSSSCG00000043773-U6	ENSSSCG00000043773-ENSSSCG00000018997	snv
	16	15850391	T	A	0.508065	F0-657	edited_step	fix	intergenic_region	MODIFIER	ENSSSCG00000047519-ENSSSCG00000033328	ENSSSCG00000047519-ENSSSCG00000033328	snv
	16	16997241	A	C	0.508333	F0-657	nuclear_transfor_step	fix	intergenic_region	MODIFIER	ENSSSCG00000043218-ENSSSCG00000048639	ENSSSCG00000043218-ENSSSCG00000048639	snv
	16	18779360	T	C	0.415584	F0-657	nuclear_transfor_step	fix	3_prime_UTR_variant	MODIFIER	ENSSSCG00000032650	ENSSSCG00000032650	snv
	16	19009957	T	C	0.390476	F0-657	edited_step	fix	intergenic_region	MODIFIER	NPR3-ENSSSCG00000044320	ENSSSCG00000036201-ENSSSCG00000044320	snv
	16	27201202	A	C	0.0638298	F0-657	edited_step	fix	intron_variant	MODIFIER	GHR	ENSSSCG00000016866	snv
	16	30719508	C	T	0.57	F0-657	edited_step	fix	intergenic_region	MODIFIER	ENSSSCG00000050819-ISL1	ENSSSCG00000050819-ENSSSCG00000016883	snv
	16	31012697	T	G	0.508197	F0-657	edited_step	fix	intergenic_region	MODIFIER	ISL1-ENSSSCG00000042562	ENSSSCG00000016883-ENSSSCG00000042562	snv
	16	39916475	T	C	0.456693	F0-657	nuclear_transfor_step	fix	intron_variant	MODIFIER	NDUFAF2	ENSSSCG00000027763	snv
	16	40766042	A	C	0.702128	F0-657	edited_step	fix	intergenic_region	MODIFIER	ENSSSCG00000046595-KIF2A	ENSSSCG00000046595-ENSSSCG00000030186	snv
	16	41925124	C	A	0.0190476	F0-657	edited_step	fix	intergenic_region	MODIFIER	ENSSSCG00000046520-ENSSSCG00000043802	ENSSSCG00000046520-ENSSSCG00000043802	snv
	16	42065755	G	T	0.102041	F0-657	edited_step	fix	intergenic_region	MODIFIER	ENSSSCG00000049006-ENSSSCG00000047026	ENSSSCG00000049006-ENSSSCG00000047026	snv
	16	42240094	T	A	0.481132	F0-657	nuclear_transfor_step	fix	intron_variant	MODIFIER	ENSSSCG00000047026	ENSSSCG00000047026	snv
	16	43361515	T	G	0.46875	F0-657	edited_step	fix	intron_variant	MODIFIER	CWC27	ENSSSCG00000016942	snv
	16	43551086	C	T	0.526316	F0-657	nuclear_transfor_step	fix	intron_variant	MODIFIER	CWC27	ENSSSCG00000016942	snv
	16	43741314	A	C	0.536585	F0-657	nuclear_transfor_step	fix	intron_variant	MODIFIER	ADAMTS6	ENSSSCG00000016943	snv
	16	43741383	T	G	0.536	F0-657	nuclear_transfor_step	fix	intron_variant	MODIFIER	ADAMTS6	ENSSSCG00000016943	snv
	16	43743681	C	T	0.483333	F0-657	nuclear_transfor_step	fix	intron_variant	MODIFIER	ADAMTS6	ENSSSCG00000016943	snv
	16	44685389	A	G	0.0131579	F0-657	edited_step	fix	downstream_gene_variant	MODIFIER	ENSSSCG00000048485	ENSSSCG00000048485	snv
	16	48170226	G	T	0.425	F0-657	edited_step	fix	intergenic_region	MODIFIER	SNORD39-MAP1B	ENSSSCG00000022219-ENSSSCG00000016974	snv
	16	52314849	A	G	0.553846	F0-657	edited_step	fix	intron_variant	MODIFIER	FBXW11	ENSSSCG00000023307	snv
	16	53635014	G	A	0.490196	F0-657	edited_step	fix	downstream_gene_variant	MODIFIER	KCNMB1	ENSSSCG00000017005	snv
	16	54442139	C	T	0.402299	F0-657	edited_step	fix	intron_variant	MODIFIER	ENSSSCG00000041925	ENSSSCG00000041925	snv
	16	54665557	C	T	0.5	F0-657	edited_step	fix	intron_variant	MODIFIER	SLIT3	ENSSSCG00000017012	snv
	16	56276894	G	T	0.505155	F0-657	edited_step	fix	intron_variant	MODIFIER	TENM2	ENSSSCG00000017018	snv
	16	56491751	T	G	0.0102041	F0-657	edited_step	fix	intron_variant	MODIFIER	TENM2	ENSSSCG00000017018	snv
	16	57586381	G	T	0.01	F0-657	edited_step	fix	intergenic_region	MODIFIER	ENSSSCG00000041053-ENSSSCG00000051364	ENSSSCG00000041053-ENSSSCG00000051364	snv
	16	58382953	G	T	0.347368	F0-657	edited_step	fix	intergenic_region	MODIFIER	ENSSSCG00000050968-ENSSSCG00000047908	ENSSSCG00000050968-ENSSSCG00000047908	snv
	16	58409008	A	G	0.625	F0-657	edited_step	fix	intergenic_region	MODIFIER	ENSSSCG00000050968-ENSSSCG00000047908	ENSSSCG00000050968-ENSSSCG00000047908	snv
	16	58814970	A	G	0.530612	F0-657	nuclear_transfor_step	fix	intergenic_region	MODIFIER	ENSSSCG00000047908-ENSSSCG00000046048	ENSSSCG00000047908-ENSSSCG00000046048	snv
	16	59184291	G	T	0.492647	F0-657	nuclear_transfor_step	fix	intergenic_region	MODIFIER	ENSSSCG00000047908-ENSSSCG00000046048	ENSSSCG00000047908-ENSSSCG00000046048	snv
	16	60565794	G	A	0.15	F0-657	edited_step	fix	intron_variant	MODIFIER	ENSSSCG00000050950	ENSSSCG00000050950	snv
	16	61265064	A	G	0.444444	F0-657	edited_step	fix	intergenic_region	MODIFIER	ENSSSCG00000049645-GABRG2	ENSSSCG00000049645-ENSSSCG00000017025	snv
	16	61587274	A	G	0.484615	F0-657	nuclear_transfor_step	fix	intergenic_region	MODIFIER	GABRG2-GABRA1	ENSSSCG00000017025-ENSSSCG00000023661	snv
	16	61970209	G	T	0.520833	F0-657	nuclear_transfor_step	fix	upstream_gene_variant	MODIFIER	ENSSSCG00000041732	ENSSSCG00000041732	snv
	16	62046787	T	G	0.00970874	F0-657	edited_step	fix	intron_variant	MODIFIER	GABRB2	ENSSSCG00000033558	snv
	16	62378370	G	T	0.459184	F0-657	edited_step	fix	intergenic_region	MODIFIER	ENSSSCG00000044310-ATP10B	ENSSSCG00000044310-ENSSSCG00000021527	snv
	16	62513113	C	A	0.447059	F0-657	nuclear_transfor_step	fix	intergenic_region	MODIFIER	ENSSSCG00000044310-ATP10B	ENSSSCG00000044310-ENSSSCG00000021527	snv
	16	62860273	G	T	0.485714	F0-657	nuclear_transfor_step	fix	intron_variant	MODIFIER	ATP10B	ENSSSCG00000021527	snv
	16	63847245	C	G	0.0192308	F0-657	isolation_step	fix	intergenic_region	MODIFIER	TTC1-ENSSSCG00000047574	ENSSSCG00000040528-ENSSSCG00000047574	snv
	16	66531717	G	C	0.00877193	F0-657	edited_step	fix	intron_variant	MODIFIER	SGCD	ENSSSCG00000017063	snv
	16	70402229	T	C	0.450549	F0-657	edited_step	fix	intergenic_region	MODIFIER	ENSSSCG00000019555-U6	ENSSSCG00000019555-ENSSSCG00000035184	snv
	16	73764123	A	C	0.00729927	F0-657	edited_step	fix	intergenic_region	MODIFIER	ENSSSCG00000042088-U6	ENSSSCG00000042088-ENSSSCG00000038012	snv
	16	73781334	A	G	0.481481	F0-657	nuclear_transfor_step	fix	intergenic_region	MODIFIER	ENSSSCG00000042088-U6	ENSSSCG00000042088-ENSSSCG00000038012	snv
	16	73919498	T	A	0.566667	F0-657	edited_step	fix	intergenic_region	MODIFIER	U6-ENSSSCG00000041762	ENSSSCG00000038012-ENSSSCG00000041762	snv
	16	74324808	C	A	0.5	F0-657	edited_step	fix	intron_variant	MODIFIER	ADCY2	ENSSSCG00000017101	snv
	16	75086850	C	A	0.24	F0-657	edited_step	fix	intergenic_region	MODIFIER	ENSSSCG00000050628-ENSSSCG00000042970	ENSSSCG00000050628-ENSSSCG00000042970	snv
	16	77500365	A	G	0.548387	F0-657	nuclear_transfor_step	fix	intergenic_region	MODIFIER	ENSSSCG00000043539-IRX1	ENSSSCG00000043539-ENSSSCG00000034884	snv
	17	606400	A	T	0.0305344	F0-657	edited_step	fix	intergenic_region	MODIFIER	ENSSSCG00000043064-ENSSSCG00000025403	ENSSSCG00000043064-ENSSSCG00000025403	snv
	17	4086425	A	C	0.00961538	F0-657	edited_step	fix	intergenic_region	MODIFIER	MSR1-U2	ENSSSCG00000006979-ENSSSCG00000044006	snv
	17	7440399	A	C	0.571429	F0-657	edited_step	fix	intergenic_region	MODIFIER	ZFP42-ENSSSCG00000045345	ENSSSCG00000035444-ENSSSCG00000045345	snv
	17	9119719	T	G	0.523364	F0-657	edited_step	fix	intron_variant	MODIFIER	ADAM3A	ENSSSCG00000007009	snv
	17	10119413	T	G	0.516484	F0-657	edited_step	fix	intron_variant	MODIFIER	ZMAT4	ENSSSCG00000007010	snv
	17	15310222	A	G	0.445545	F0-657	nuclear_transfor_step	fix	intron_variant	MODIFIER	ENSSSCG00000043546	ENSSSCG00000043546	snv
	17	17144569	A	G	0.44	F0-657	edited_step	fix	intron_variant	MODIFIER	PLCB1	ENSSSCG00000007056	snv
	17	23801717	G	T	0.489583	F0-657	edited_step	fix	intron_variant	MODIFIER	MACROD2	ENSSSCG00000030112	snv
	17	27477899	A	C	0.504348	F0-657	nuclear_transfor_step	fix	intron_variant	MODIFIER	SLC24A3	ENSSSCG00000007100	snv
	17	28726248	G	A	0.0714286	F0-657	edited_step	fix	intergenic_region	MODIFIER	RALGAPA2-U6	ENSSSCG00000026506-ENSSSCG00000037604	snv
	17	34988949	T	G	0.016129	F0-657	isolation_step	fix	intergenic_region	MODIFIER	DEFB127-DEFB125	ENSSSCG00000035759-ENSSSCG00000007217	snv
	17	36299453	T	C	0.416667	F0-657	nuclear_transfor_step	fix	3_prime_UTR_variant	MODIFIER	NOL4L	ENSSSCG00000007249	snv
	17	38202851	C	G	0.00740741	F0-657	isolation_step	fix	intron_variant	MODIFIER	NCOA6	ENSSSCG00000007284	snv
	17	44834095	C	A	0.00769231	F0-657	isolation_step	fix	intron_variant	MODIFIER	PTPRT	ENSSSCG00000038990	snv
	17	45441376	C	T	0.533333	F0-657	edited_step	fix	intron_variant	MODIFIER	PTPRT	ENSSSCG00000038990	snv
	17	45988606	A	T	0.00787402	F0-657	isolation_step	fix	intron_variant	MODIFIER	ENSSSCG00000051590	ENSSSCG00000051590	snv
	17	50029402	C	A	0.477941	F0-657	nuclear_transfor_step	fix	intergenic_region	MODIFIER	SULF2-ENSSSCG00000048424	ENSSSCG00000007456-ENSSSCG00000048424	snv
	17	51408175	T	C	0.4	F0-657	edited_step	fix	intron_variant	MODIFIER	SLC9A8	ENSSSCG00000007466	snv
	17	55274334	C	A	0.012987	F0-657	isolation_step	fix	intergenic_region	MODIFIER	PFDN4-ENSSSCG00000043848	ENSSSCG00000007487-ENSSSCG00000043848	snv
	17	56215569	T	A	0.537037	F0-657	nuclear_transfor_step	fix	downstream_gene_variant	MODIFIER	ENSSSCG00000047911	ENSSSCG00000047911	snv
	17	57598064	T	G	0.038961	F0-657	edited_step	fix	intron_variant	MODIFIER	BMP7	ENSSSCG00000007501	snv
	17	60594265	T	C	0.00847458	F0-657	isolation_step	fix	intron_variant	MODIFIER	ENSSSCG00000050535	ENSSSCG00000050535	snv
	17	60702488	G	T	0.46729	F0-657	edited_step	fix	downstream_gene_variant	MODIFIER	ENSSSCG00000050535	ENSSSCG00000050535	snv
	17	61910134	C	G	0.477876	F0-657	nuclear_transfor_step	fix	intron_variant	MODIFIER	ENSSSCG00000050060	ENSSSCG00000050060	snv
	18	154741	G	C	0.462185	F0-657	edited_step	fix	intergenic_region	MODIFIER	ENSSSCG00000044315-ENSSSCG00000046530	ENSSSCG00000044315-ENSSSCG00000046530	snv
	18	2002157	G	T	0.431034	F0-657	nuclear_transfor_step	fix	downstream_gene_variant	MODIFIER	ENSSSCG00000047061	ENSSSCG00000047061	snv
	18	2812551	C	T	0.457143	F0-657	nuclear_transfor_step	fix	upstream_gene_variant	MODIFIER	ENSSSCG00000049757	ENSSSCG00000049757	snv
	18	4280591	G	A	0.00934579	F0-657	isolation_step	fix	intergenic_region	MODIFIER	DPP6-ENSSSCG00000042794	ENSSSCG00000016423-ENSSSCG00000042794	snv
	18	7319101	C	A	0.223881	F0-657	edited_step	fix	downstream_gene_variant	MODIFIER	KEL	ENSSSCG00000016472	snv
	18	7923957	G	T	0.430233	F0-657	nuclear_transfor_step	fix	intron_variant	MODIFIER	MGAM	ENSSSCG00000034639	snv
	18	8108667	A	C	0.0208333	F0-657	edited_step	fix	5_prime_UTR_premature_start_codon_gain_variant	LOW	ENSSSCG00000046165	ENSSSCG00000046165	snv
	18	11267419	T	G	0.5	F0-657	edited_step	fix	intergenic_region	MODIFIER	ENSSSCG00000045285-ENSSSCG00000044154	ENSSSCG00000045285-ENSSSCG00000044154	snv
	18	12210302	A	T	0.00925926	F0-657	edited_step	fix	upstream_gene_variant	MODIFIER	ENSSSCG00000046284	ENSSSCG00000046284	snv
	18	21394372	G	C	0.466667	F0-657	nuclear_transfor_step	fix	intron_variant	MODIFIER	GRM8	ENSSSCG00000022865	snv
	18	23008372	C	A	0.513274	F0-657	nuclear_transfor_step	fix	intergenic_region	MODIFIER	POT1-GPR37	ENSSSCG00000016597-ENSSSCG00000016599	snv
	18	24225823	A	G	0.564356	F0-657	edited_step	fix	intergenic_region	MODIFIER	SLC13A1-TAS2R16	ENSSSCG00000016609-ENSSSCG00000037368	snv
	18	26401923	C	G	0.54717	F0-657	edited_step	fix	intron_variant	MODIFIER	KCND2	ENSSSCG00000016621	snv
	18	27879520	T	C	0.471831	F0-657	nuclear_transfor_step	fix	intron_variant	MODIFIER	ENSSSCG00000035981	ENSSSCG00000035981	snv
	18	30688601	T	G	0.453846	F0-657	nuclear_transfor_step	fix	intergenic_region	MODIFIER	ENSSSCG00000045155-ENSSSCG00000042905	ENSSSCG00000045155-ENSSSCG00000042905	snv
	18	31577162	T	A	0.491071	F0-657	edited_step	fix	intron_variant	MODIFIER	FOXP2	ENSSSCG00000016639	snv
	18	34078861	T	G	0.0454545	F0-657	edited_step	fix	3_prime_UTR_variant	MODIFIER	IMMP2L	ENSSSCG00000016650	snv
	18	34396289	A	T	0.511628	F0-657	nuclear_transfor_step	fix	intron_variant	MODIFIER	IMMP2L	ENSSSCG00000016650	snv
	18	40430537	T	C	0.514493	F0-657	nuclear_transfor_step	fix	upstream_gene_variant	MODIFIER	ENSSSCG00000049414	ENSSSCG00000049414	snv
	18	42081721	C	G	0.444444	F0-657	edited_step	fix	upstream_gene_variant	MODIFIER	ENSSSCG00000033190	ENSSSCG00000033190	snv
	18	44181399	G	C	0.559055	F0-657	nuclear_transfor_step	fix	intron_variant	MODIFIER	CREB5	ENSSSCG00000016690	snv
	18	44181428	A	C	0.511278	F0-657	nuclear_transfor_step	fix	intron_variant	MODIFIER	CREB5	ENSSSCG00000016690	snv
	18	46484682	G	T	0.468531	F0-657	edited_step	fix	intron_variant	MODIFIER	ENSSSCG00000041810	ENSSSCG00000041810	snv
	18	46840278	A	G	0.471074	F0-657	nuclear_transfor_step	fix	intergenic_region	MODIFIER	ENSSSCG00000041810-ENSSSCG00000042664	ENSSSCG00000041810-ENSSSCG00000042664	snv
	18	47670715	A	G	0.526316	F0-657	edited_step	fix	intron_variant	MODIFIER	MPP6	ENSSSCG00000016717	snv
	18	51563968	A	G	0.060241	F0-657	edited_step	fix	intron_variant	MODIFIER	HECW1	ENSSSCG00000036443	snv
	18	51657653	G	A	0.473684	F0-657	edited_step	fix	intron_variant	MODIFIER	HECW1	ENSSSCG00000036443	snv
	1	34933027	A	AT	0.210526	F0-657	edited_step	fix	intron_variant	MODIFIER	PTPRK	ENSSSCG00000004209	indel
	1	36197471	TA	T	0.586207	F0-657	edited_step	fix	intergenic_region	MODIFIER	RSPO3-ENSSSCG00000042355	ENSSSCG00000004218-ENSSSCG00000042355	indel
	1	36574883	T	TA	0.552381	F0-657	nuclear_transfor_step	fix	intron_variant	MODIFIER	CENPW	ENSSSCG00000045632	indel
	1	45955075	CCA	C	0.431034	F0-657	nuclear_transfor_step	fix	intergenic_region	MODIFIER	PHF3-ENSSSCG00000049526	ENSSSCG00000035259-ENSSSCG00000049526	indel
	1	48322944	T	TG	0.464912	F0-657	nuclear_transfor_step	fix	intergenic_region	MODIFIER	ENSSSCG00000050497-ENSSSCG00000047735	ENSSSCG00000050497-ENSSSCG00000047735	indel
	1	52237759	C	CA	0.55	F0-657	edited_step	fix	intron_variant	MODIFIER	RIMS1	ENSSSCG00000004280	indel
	1	131738981	CCTGCTTGTTGCAGAT	C	0.509804	F0-657	edited_step	fix	conservative_inframe_deletion	MODERATE	THBS1	ENSSSCG00000004789	indel
	1	143578991	AT	A	0.0307692	F0-657	edited_step	fix	intergenic_region	MODIFIER	KLF13-ENSSSCG00000048005	ENSSSCG00000026006-ENSSSCG00000048005	indel
	1	146423637	GT	G	0.439252	F0-657	edited_step	fix	intergenic_region	MODIFIER	ENSSSCG00000039717-ENSSSCG00000036442	ENSSSCG00000039717-ENSSSCG00000036442	indel
	1	157540388	GA	G	0.494737	F0-657	nuclear_transfor_step	fix	intergenic_region	MODIFIER	ENSSSCG00000047724-SERPINB8	ENSSSCG00000047724-ENSSSCG00000004888	indel
	1	170286155	T	TA	0.504854	F0-657	edited_step	fix	intergenic_region	MODIFIER	ENSSSCG00000041908-ENSSSCG00000044170	ENSSSCG00000041908-ENSSSCG00000044170	indel
	1	172043578	CT	C	0.011236	F0-657	isolation_step	fix	intron_variant	MODIFIER	LRFN5	ENSSSCG00000004990	indel
	1	186438214	T	TTAG	0.6	F0-657	edited_step	fix	intron_variant	MODIFIER	AP5M1	ENSSSCG00000005065	indel
	1	196954354	TA	T	0.505263	F0-657	edited_step	fix	intergenic_region	MODIFIER	U6-TUSC1	ENSSSCG00000037763-ENSSSCG00000005128	indel
	1	233909120	C	CA	0.166667	F0-657	edited_step	fix	intergenic_region	MODIFIER	ENSSSCG00000048153-ENSSSCG00000042784	ENSSSCG00000048153-ENSSSCG00000042784	indel
	1	242905862	CA	C	0.478261	F0-657	edited_step	fix	downstream_gene_variant	MODIFIER	ENSSSCG00000042524	ENSSSCG00000042524	indel
	1	258028749	GT	G	0.0128205	F0-657	edited_step	fix	intergenic_region	MODIFIER	ASTN2-TLR4	ENSSSCG00000005502-ENSSSCG00000005503	indel
	1	265435923	TA	T	0.0364964	F0-657	isolation_step	fix	intron_variant	MODIFIER	NR6A1	ENSSSCG00000005589	indel
	2	30397853	AC	A	0.516667	F0-657	edited_step	fix	intron_variant	MODIFIER	FSHB	ENSSSCG00000013328	indel
	2	74306953	GC	G	0.558824	F0-657	edited_step	fix	downstream_gene_variant	MODIFIER	PLIN5	ENSSSCG00000013513	indel
	2	93614361	A	AT	0.534653	F0-657	edited_step	fix	intergenic_region	MODIFIER	EDIL3-COX7C	ENSSSCG00000026780-ENSSSCG00000040325	indel
	3	436759	T	TG	0.478873	F0-657	edited_step	fix	intron_variant	MODIFIER	DNAAF5	ENSSSCG00000007543	indel
	3	90349734	T	TA	0.556962	F0-657	edited_step	fix	intron_variant	MODIFIER	NRXN1	ENSSSCG00000026180	indel
	3	91209304	CT	C	0.13	F0-657	edited_step	fix	intergenic_region	MODIFIER	ENSSSCG00000046370-ENSSSCG00000047503	ENSSSCG00000046370-ENSSSCG00000047503	indel
	3	102780498	T	TA	0.615385	F0-657	edited_step	fix	intergenic_region	MODIFIER	ENSSSCG00000050928-QPCT	ENSSSCG00000050928-ENSSSCG00000008491	indel
	3	116468139	G	GA	0.0679612	F0-657	edited_step	fix	intron_variant	MODIFIER	ENSSSCG00000048838	ENSSSCG00000048838	indel
	4	73175067	TC	T	0.58427	F0-657	edited_step	fix	intergenic_region	MODIFIER	CA8-ENSSSCG00000043492	ENSSSCG00000006233-ENSSSCG00000043492	indel
	4	113862603	GT	G	0.0169492	F0-657	isolation_step	fix	intergenic_region	MODIFIER	ENSSSCG00000041856-ENSSSCG00000035697	ENSSSCG00000041856-ENSSSCG00000035697	indel
	5	16897139	TA	T	0.375	F0-657	edited_step	fix	intron_variant	MODIFIER	SLC4A8	ENSSSCG00000028060	indel
	5	55431363	CT	C	0.559524	F0-657	edited_step	fix	intergenic_region	MODIFIER	ENSSSCG00000042813-U6	ENSSSCG00000042813-ENSSSCG00000020547	indel
	5	98795214	GA	G	0.505882	F0-657	nuclear_transfor_step	fix	intron_variant	MODIFIER	TMTC2	ENSSSCG00000024065	indel
	5	100363148	A	AAT	0.526786	F0-657	nuclear_transfor_step	fix	intron_variant	MODIFIER	ACSS3	ENSSSCG00000000939	indel
	6	23648876	A	AT	0.554054	F0-657	edited_step	fix	intergenic_region	MODIFIER	ENSSSCG00000047100-U2	ENSSSCG00000047100-ENSSSCG00000018823	indel
	6	113586547	CT	C	0.0625	F0-657	isolation_step	fix	upstream_gene_variant	MODIFIER	ENSSSCG00000045075	ENSSSCG00000045075	indel
	7	62302740	CCAAGGCTCAAGGGGGTGT	C	0.435185	F0-657	edited_step	fix	intron_variant	MODIFIER	ENSSSCG00000001939	ENSSSCG00000001939	indel
	8	26658556	GT	G	0.5125	F0-657	edited_step	fix	intergenic_region	MODIFIER	PCDH7-ENSSSCG00000008767	ENSSSCG00000008765-ENSSSCG00000008767	indel
	8	49363419	CT	C	0.015625	F0-657	isolation_step	fix	intergenic_region	MODIFIER	ENSSSCG00000042238-U6	ENSSSCG00000042238-ENSSSCG00000020037	indel
	8	57680850	AT	A	0.0133333	F0-657	isolation_step	fix	intron_variant	MODIFIER	ENSSSCG00000043804	ENSSSCG00000043804	indel
	8	61532975	G	GA	0.469697	F0-657	edited_step	fix	intergenic_region	MODIFIER	ENSSSCG00000031193-ENSSSCG00000047276	ENSSSCG00000031193-ENSSSCG00000047276	indel
	8	104125305	G	GT	0.506329	F0-657	edited_step	fix	intergenic_region	MODIFIER	ENSSSCG00000009105-ENSSSCG00000043231	ENSSSCG00000009105-ENSSSCG00000043231	indel
	8	110047861	T	TACACACACACACACAC	0.047619	F0-657	isolation_step	fix	downstream_gene_variant	MODIFIER	ENSSSCG00000043114	ENSSSCG00000043114	indel
	9	1397155	G	GA	0.504762	F0-657	edited_step	fix	intergenic_region	MODIFIER	ENSSSCG00000042620-ENSSSCG00000014587	ENSSSCG00000042620-ENSSSCG00000014587	indel
	9	11836021	TG	T	0.554745	F0-657	nuclear_transfor_step	fix	downstream_gene_variant	MODIFIER	PAK1	ENSSSCG00000014878	indel
	9	19018410	AT	A	0.493333	F0-657	edited_step	fix	intron_variant	MODIFIER	DLG2	ENSSSCG00000014904	indel
	9	31251662	T	TGATTTCACAG	0.264151	F0-657	isolation_step	fix	intron_variant	MODIFIER	CNTN5	ENSSSCG00000014975	indel
	9	54155875	CG	C	0.38961	F0-657	nuclear_transfor_step	fix	intergenic_region	MODIFIER	KIRREL3-ENSSSCG00000048188	ENSSSCG00000015234-ENSSSCG00000048188	indel
	9	59859120	T	TA	0.0263158	F0-657	isolation_step	fix	intron_variant	MODIFIER	OPCML	ENSSSCG00000037534	indel
	9	91569481	TTAA	T	0.5	F0-657	edited_step	fix	downstream_gene_variant	MODIFIER	TOMM7	ENSSSCG00000015384	indel
	9	101445652	A	AT	0.0123457	F0-657	edited_step	fix	intron_variant	MODIFIER	MAGI2	ENSSSCG00000031780	indel
	9	112095180	C	CT	0.547619	F0-657	edited_step	fix	intergenic_region	MODIFIER	ENSSSCG00000048608-ENSSSCG00000045606	ENSSSCG00000048608-ENSSSCG00000045606	indel
	10	6351052	T	TC	0.531532	F0-657	edited_step	fix	intergenic_region	MODIFIER	KCTD3-ENSSSCG00000038066	ENSSSCG00000010811-ENSSSCG00000038066	indel
	10	14714291	GA	G	0.341772	F0-657	edited_step	fix	intron_variant	MODIFIER	CDC42BPA	ENSSSCG00000010862	indel
	10	18580933	AT	A	0.169643	F0-657	edited_step	fix	intron_variant	MODIFIER	SMYD3	ENSSSCG00000022034	indel
	10	34691763	AT	A	0.552083	F0-657	nuclear_transfor_step	fix	intergenic_region	MODIFIER	ENSSSCG00000051170-ENSSSCG00000045956	ENSSSCG00000051170-ENSSSCG00000045956	indel
	10	49895874	CTA	C	0.0689655	F0-657	edited_step	fix	intron_variant	MODIFIER	GPR158	ENSSSCG00000038536	indel
	10	52854458	C	CT	0.494253	F0-657	edited_step	fix	intergenic_region	MODIFIER	COMMD3-DNAJC1	ENSSSCG00000011082-ENSSSCG00000026001	indel
	11	29985312	GA	G	0.454545	F0-657	edited_step	fix	intergenic_region	MODIFIER	ENSSSCG00000035135-PCDH17	ENSSSCG00000035135-ENSSSCG00000009446	indel
	11	34199529	G	GCT	0.534884	F0-657	edited_step	fix	intergenic_region	MODIFIER	ENSSSCG00000020435-ENSSSCG00000031955	ENSSSCG00000020435-ENSSSCG00000031955	indel
	11	34358367	C	CA	0.583333	F0-657	edited_step	fix	intergenic_region	MODIFIER	ENSSSCG00000020435-ENSSSCG00000031955	ENSSSCG00000020435-ENSSSCG00000031955	indel
	12	4746313	TC	T	0.568182	F0-657	edited_step	fix	intergenic_region	MODIFIER	MGAT5B-ENSSSCG00000047382	ENSSSCG00000017170-ENSSSCG00000047382	indel
	12	29915753	CA	C	0.0108696	F0-657	edited_step	fix	intergenic_region	MODIFIER	ENSSSCG00000047265-KIF2B	ENSSSCG00000047265-ENSSSCG00000017599	indel
	13	91689154	T	TG	0.488	F0-657	nuclear_transfor_step	fix	intergenic_region	MODIFIER	IGSF10-ENSSSCG00000041867	ENSSSCG00000011717-ENSSSCG00000041867	indel
	13	108076100	A	AAT	0.366197	F0-657	edited_step	fix	intron_variant	MODIFIER	MECOM	ENSSSCG00000011743	indel
	13	174112674	C	CT	0.494845	F0-657	edited_step	fix	intergenic_region	MODIFIER	GBE1-ENSSSCG00000047842	ENSSSCG00000012000-ENSSSCG00000047842	indel
	13	175580168	TC	T	0.0294118	F0-657	edited_step	fix	intron_variant	MODIFIER	ROBO1	ENSSSCG00000012001	indel
	13	188748969	T	TTC	0.0133333	F0-657	edited_step	fix	intergenic_region	MODIFIER	ENSSSCG00000050420-ENSSSCG00000043493	ENSSSCG00000050420-ENSSSCG00000043493	indel
	14	75789042	T	TGCTTCAGTGACA	0.38	F0-657	edited_step	fix	intergenic_region	MODIFIER	PLA2G12B-ENSSSCG00000042774	ENSSSCG00000010291-ENSSSCG00000042774	indel
	14	95119867	GA	G	0.434343	F0-657	edited_step	fix	intergenic_region	MODIFIER	ENSSSCG00000043392-ENSSSCG00000041260	ENSSSCG00000043392-ENSSSCG00000041260	indel
	14	117307736	C	CT	0.475806	F0-657	edited_step	fix	intergenic_region	MODIFIER	ENSSSCG00000047988-SORCS1	ENSSSCG00000047988-ENSSSCG00000030026	indel
	15	10433946	AG	A	0.490385	F0-657	nuclear_transfor_step	fix	intron_variant	MODIFIER	LRP1B	ENSSSCG00000023746	indel
	15	70088073	AT	A	0.453704	F0-657	edited_step	fix	intergenic_region	MODIFIER	ENSSSCG00000045707-FIGN	ENSSSCG00000045707-ENSSSCG00000034262	indel
	15	103331061	AT	A	0.567308	F0-657	edited_step	fix	intron_variant	MODIFIER	ENSSSCG00000016085	ENSSSCG00000016085	indel
	16	15134295	C	CA	0.530612	F0-657	edited_step	fix	intergenic_region	MODIFIER	ENSSSCG00000047519-ENSSSCG00000033328	ENSSSCG00000047519-ENSSSCG00000033328	indel
	16	48078608	AT	A	0.44	F0-657	edited_step	fix	intergenic_region	MODIFIER	CARTPT-SNORD39	ENSSSCG00000016972-ENSSSCG00000022219	indel
	16	54807509	A	AAGAG	0.413462	F0-657	edited_step	fix	intron_variant	MODIFIER	SLIT3	ENSSSCG00000017012	indel
	16	60711341	TA	T	0.469388	F0-657	edited_step	fix	intergenic_region	MODIFIER	ENSSSCG00000050950-ENSSSCG00000051309	ENSSSCG00000050950-ENSSSCG00000051309	indel
	16	66598570	AT	A	0.33	F0-657	edited_step	fix	intron_variant	MODIFIER	SGCD	ENSSSCG00000017063	indel
	17	16216227	AG	A	0.588889	F0-657	edited_step	fix	intergenic_region	MODIFIER	ENSSSCG00000044030-HAO1	ENSSSCG00000044030-ENSSSCG00000027439	indel
	17	25529263	C	CA	0.585714	F0-657	edited_step	fix	intergenic_region	MODIFIER	ENSSSCG00000007082-PCSK2	ENSSSCG00000007082-ENSSSCG00000007083	indel
	17	43057957	CA	C	0.514851	F0-657	edited_step	fix	intergenic_region	MODIFIER	ENSSSCG00000043184-ENSSSCG00000046270	ENSSSCG00000043184-ENSSSCG00000046270	indel
	18	929954	C	CT	0.435294	F0-657	edited_step	fix	intron_variant	MODIFIER	PTPRN2	ENSSSCG00000026661	indel
	1	357576	G	A	0.0136986	F0-669	edited_step	fix	intergenic_region	MODIFIER	ENSSSCG00000043002-ENSSSCG00000050193	ENSSSCG00000043002-ENSSSCG00000050193	snv
	1	3479401	G	T	0.563636	F0-669	nuclear_transfor_step	fix	intergenic_region	MODIFIER	PDE10A-ENSSSCG00000044274	ENSSSCG00000004027-ENSSSCG00000044274	snv
	1	6019490	C	G	0.00952381	F0-669	edited_step	fix	intron_variant	MODIFIER	PRKN	ENSSSCG00000004032	snv
	1	7735492	C	A	0.533333	F0-669	nuclear_transfor_step	fix	intergenic_region	MODIFIER	SOD2-ENSSSCG00000048737	ENSSSCG00000040317-ENSSSCG00000048737	snv
	1	13191316	G	A	0.44898	F0-669	edited_step	fix	intergenic_region	MODIFIER	ENSSSCG00000050641-RGS17	ENSSSCG00000050641-ENSSSCG00000004075	snv
	1	17991010	C	A	0.472222	F0-669	edited_step	fix	intergenic_region	MODIFIER	ENSSSCG00000046147-ENSSSCG00000042893	ENSSSCG00000046147-ENSSSCG00000042893	snv
	1	19692512	G	T	0.487395	F0-669	edited_step	fix	intron_variant	MODIFIER	SHPRH	ENSSSCG00000004120	snv
	1	21320634	T	C	0.521739	F0-669	nuclear_transfor_step	fix	intron_variant	MODIFIER	PLAGL1	ENSSSCG00000004127	snv
	1	27035312	C	T	0.0454545	F0-669	edited_step	fix	upstream_gene_variant	MODIFIER	IFNGR1	ENSSSCG00000004156	snv
	1	31299883	C	A	0.0551181	F0-669	edited_step	fix	intron_variant	MODIFIER	MOXD1	ENSSSCG00000004191	snv
	1	34347511	A	G	0.511364	F0-669	nuclear_transfor_step	fix	downstream_gene_variant	MODIFIER	ENSSSCG00000045783	ENSSSCG00000045783	snv
	1	37175698	C	G	0.0106383	F0-669	isolation_step	fix	intron_variant	MODIFIER	NCOA7	ENSSSCG00000004222	snv
	1	39492827	G	T	0.452381	F0-669	edited_step	fix	intron_variant	MODIFIER	TRDN	ENSSSCG00000027613	snv
	1	39509776	A	C	0.433735	F0-669	nuclear_transfor_step	fix	intron_variant	MODIFIER	TRDN	ENSSSCG00000027613	snv
	1	41993394	C	A	0.100917	F0-669	edited_step	fix	intergenic_region	MODIFIER	ENSSSCG00000041950-ENSSSCG00000050192	ENSSSCG00000041950-ENSSSCG00000050192	snv
	1	42754309	A	C	0.59375	F0-669	edited_step	fix	intron_variant	MODIFIER	MAN1A1	ENSSSCG00000004244	snv
	1	43033323	T	G	0.447368	F0-669	edited_step	fix	intron_variant	MODIFIER	FAM184A	ENSSSCG00000004245	snv
	1	44009601	G	T	0.364706	F0-669	edited_step	fix	intergenic_region	MODIFIER	ENSSSCG00000042072-ENSSSCG00000045405	ENSSSCG00000042072-ENSSSCG00000045405	snv
	1	44846795	A	G	0.550388	F0-669	edited_step	fix	intergenic_region	MODIFIER	U6-GPRC6A	ENSSSCG00000019126-ENSSSCG00000036207	snv
	1	45980952	A	G	0.58	F0-669	nuclear_transfor_step	fix	intergenic_region	MODIFIER	PHF3-ENSSSCG00000049526	ENSSSCG00000035259-ENSSSCG00000049526	snv
	1	46429692	T	C	0.413462	F0-669	edited_step	fix	intergenic_region	MODIFIER	ENSSSCG00000049526-ENSSSCG00000004269	ENSSSCG00000049526-ENSSSCG00000004269	snv
	1	46511473	C	A	0.465347	F0-669	nuclear_transfor_step	fix	intergenic_region	MODIFIER	ENSSSCG00000049526-ENSSSCG00000004269	ENSSSCG00000049526-ENSSSCG00000004269	snv
	1	47292518	A	G	0.466667	F0-669	edited_step	fix	intergenic_region	MODIFIER	U6-U2	ENSSSCG00000020480-ENSSSCG00000043187	snv
	1	48903399	G	T	0.6	F0-669	nuclear_transfor_step	fix	intron_variant	MODIFIER	ADGRB3	ENSSSCG00000004270	snv
	1	51526909	C	A	0.495327	F0-669	nuclear_transfor_step	fix	intergenic_region	MODIFIER	SNORA70-ENSSSCG00000046159	ENSSSCG00000020544-ENSSSCG00000046159	snv
	1	58217511	T	C	0.463158	F0-669	nuclear_transfor_step	fix	upstream_gene_variant	MODIFIER	ENSSSCG00000044269	ENSSSCG00000044269	snv
	1	58301638	T	G	0.429688	F0-669	nuclear_transfor_step	fix	intergenic_region	MODIFIER	ENSSSCG00000044269-ENSSSCG00000048267	ENSSSCG00000044269-ENSSSCG00000048267	snv
	1	59485041	T	G	0.360465	F0-669	nuclear_transfor_step	fix	intergenic_region	MODIFIER	ENSSSCG00000048181-U2	ENSSSCG00000048181-ENSSSCG00000042748	snv
	1	60462152	T	G	0.0625	F0-669	edited_step	fix	intergenic_region	MODIFIER	U2-EPHA7	ENSSSCG00000042748-ENSSSCG00000004336	snv
	1	60960949	A	G	0.0178571	F0-669	edited_step	fix	intergenic_region	MODIFIER	EPHA7-ENSSSCG00000041606	ENSSSCG00000004336-ENSSSCG00000041606	snv
	1	61420382	A	G	0.464	F0-669	edited_step	fix	intergenic_region	MODIFIER	ENSSSCG00000041435-ENSSSCG00000050706	ENSSSCG00000041435-ENSSSCG00000050706	snv
	1	63246890	G	T	0.509804	F0-669	edited_step	fix	intergenic_region	MODIFIER	MANEA-ENSSSCG00000049406	ENSSSCG00000035648-ENSSSCG00000049406	snv
	1	68532030	A	C	0.444444	F0-669	nuclear_transfor_step	fix	intron_variant	MODIFIER	GRIK2	ENSSSCG00000004361	snv
	1	68780599	A	G	0.554348	F0-669	nuclear_transfor_step	fix	intergenic_region	MODIFIER	GRIK2-ENSSSCG00000046266	ENSSSCG00000004361-ENSSSCG00000046266	snv
	1	69755269	T	G	0.459184	F0-669	nuclear_transfor_step	fix	intergenic_region	MODIFIER	GRIK2-ENSSSCG00000046266	ENSSSCG00000004361-ENSSSCG00000046266	snv
	1	69922040	C	A	0.521739	F0-669	edited_step	fix	intergenic_region	MODIFIER	ENSSSCG00000047827-ENSSSCG00000041890	ENSSSCG00000047827-ENSSSCG00000041890	snv
	1	70213356	T	G	0.376344	F0-669	nuclear_transfor_step	fix	intergenic_region	MODIFIER	ENSSSCG00000047827-ENSSSCG00000041890	ENSSSCG00000047827-ENSSSCG00000041890	snv
	1	70271372	C	A	0.0123457	F0-669	edited_step	fix	intergenic_region	MODIFIER	ENSSSCG00000047827-ENSSSCG00000041890	ENSSSCG00000047827-ENSSSCG00000041890	snv
	1	70287329	A	C	0.539326	F0-669	nuclear_transfor_step	fix	intergenic_region	MODIFIER	ENSSSCG00000047827-ENSSSCG00000041890	ENSSSCG00000047827-ENSSSCG00000041890	snv
	1	70738835	G	A	0.0173913	F0-669	edited_step	fix	intergenic_region	MODIFIER	ENSSSCG00000041890-HACE1	ENSSSCG00000041890-ENSSSCG00000004364	snv
	1	79103303	C	A	0.568807	F0-669	nuclear_transfor_step	fix	intergenic_region	MODIFIER	ENSSSCG00000048426-ENSSSCG00000049926	ENSSSCG00000048426-ENSSSCG00000049926	snv
	1	80219381	C	T	0.566667	F0-669	nuclear_transfor_step	fix	intron_variant	MODIFIER	HS3ST5	ENSSSCG00000004433	snv
	1	80724806	T	C	0.449153	F0-669	nuclear_transfor_step	fix	intergenic_region	MODIFIER	ENSSSCG00000044366-ENSSSCG00000050011	ENSSSCG00000044366-ENSSSCG00000050011	snv
	1	86994908	G	A	0.460317	F0-669	edited_step	fix	intergenic_region	MODIFIER	HMGN3-PHIP	ENSSSCG00000004470-ENSSSCG00000004473	snv
	1	88247124	G	A	0.5	F0-669	edited_step	fix	intron_variant	MODIFIER	MEI4	ENSSSCG00000034152	snv
	1	88267861	T	G	0.466667	F0-669	edited_step	fix	intron_variant	MODIFIER	MEI4	ENSSSCG00000034152	snv
	1	92599061	C	A	0.4375	F0-669	nuclear_transfor_step	fix	intergenic_region	MODIFIER	ENSSSCG00000049718-ENSSSCG00000033160	ENSSSCG00000049718-ENSSSCG00000033160	snv
	1	93952500	T	G	0.544554	F0-669	edited_step	fix	intergenic_region	MODIFIER	U6-ENSSSCG00000044547	ENSSSCG00000040747-ENSSSCG00000044547	snv
	1	94770671	T	A	0.362903	F0-669	edited_step	fix	intergenic_region	MODIFIER	ENSSSCG00000050379-ENSSSCG00000051783	ENSSSCG00000050379-ENSSSCG00000051783	snv
	1	100555705	T	C	0.509259	F0-669	edited_step	fix	upstream_gene_variant	MODIFIER	U2	ENSSSCG00000019329	snv
	1	100924592	A	C	0.52	F0-669	edited_step	fix	intergenic_region	MODIFIER	ENSSSCG00000048066-ENSSSCG00000041603	ENSSSCG00000048066-ENSSSCG00000041603	snv
	1	102565870	T	C	0.00943396	F0-669	isolation_step	fix	intron_variant	MODIFIER	DCC	ENSSSCG00000040836	snv
	1	114721517	T	A	0.560748	F0-669	nuclear_transfor_step	fix	intron_variant	MODIFIER	TCF12	ENSSSCG00000004600	snv
	1	117617434	T	C	0.5	F0-669	edited_step	fix	intron_variant	MODIFIER	UNC13C	ENSSSCG00000004614	snv
	1	117672835	C	A	0.482759	F0-669	nuclear_transfor_step	fix	intron_variant	MODIFIER	UNC13C	ENSSSCG00000004614	snv
	1	117746428	C	G	0.508621	F0-669	edited_step	fix	intron_variant	MODIFIER	UNC13C	ENSSSCG00000004614	snv
	1	118108156	C	A	0.508333	F0-669	edited_step	fix	intron_variant	MODIFIER	WDR72	ENSSSCG00000004615	snv
	1	120066470	C	G	0.488636	F0-669	edited_step	fix	intron_variant	MODIFIER	SCG3	ENSSSCG00000004630	snv
	1	123221346	T	C	0.515152	F0-669	nuclear_transfor_step	fix	intron_variant	MODIFIER	FBN1	ENSSSCG00000004658	snv
	1	124176786	T	G	0.59	F0-669	nuclear_transfor_step	fix	intron_variant	MODIFIER	SEMA6D	ENSSSCG00000004663	snv
	1	124232488	A	T	0.479339	F0-669	nuclear_transfor_step	fix	intron_variant	MODIFIER	SEMA6D	ENSSSCG00000004663	snv
	1	124390764	A	C	0.333333	F0-669	edited_step	fix	intergenic_region	MODIFIER	SEMA6D-ENSSSCG00000049014	ENSSSCG00000004663-ENSSSCG00000049014	snv
	1	124738322	G	T	0.539823	F0-669	edited_step	fix	intergenic_region	MODIFIER	ENSSSCG00000042248-SNORA70	ENSSSCG00000042248-ENSSSCG00000039033	snv
	1	125369779	G	A	0.558442	F0-669	edited_step	fix	intergenic_region	MODIFIER	ENSSSCG00000050164-ENSSSCG00000045481	ENSSSCG00000050164-ENSSSCG00000045481	snv
	1	125512522	G	C	0.462264	F0-669	edited_step	fix	intergenic_region	MODIFIER	ENSSSCG00000050164-ENSSSCG00000045481	ENSSSCG00000050164-ENSSSCG00000045481	snv
	1	131427222	G	T	0.414634	F0-669	edited_step	fix	intron_variant	MODIFIER	GPR176	ENSSSCG00000004787	snv
	1	134974889	A	G	0.530435	F0-669	edited_step	fix	intergenic_region	MODIFIER	ENSSSCG00000048307-DPH6	ENSSSCG00000048307-ENSSSCG00000035254	snv
	1	139120526	A	G	0.243478	F0-669	edited_step	fix	intron_variant	MODIFIER	CERS3	ENSSSCG00000004819	snv
	1	142413775	T	G	0.431579	F0-669	nuclear_transfor_step	fix	3_prime_UTR_variant	MODIFIER	NDN	ENSSSCG00000004834	snv
	1	143381092	G	C	0.572816	F0-669	nuclear_transfor_step	fix	intron_variant	MODIFIER	OTUD7A	ENSSSCG00000004840	snv
	1	145109043	C	A	0.533333	F0-669	nuclear_transfor_step	fix	intron_variant	MODIFIER	TJP1	ENSSSCG00000004854	snv
	1	146688529	T	A	0.340909	F0-669	nuclear_transfor_step	fix	intergenic_region	MODIFIER	ENSSSCG00000036442-ENSSSCG00000044951	ENSSSCG00000036442-ENSSSCG00000044951	snv
	1	151119458	C	A	0.361702	F0-669	edited_step	fix	intergenic_region	MODIFIER	CBLN2-ENSSSCG00000044321	ENSSSCG00000020859-ENSSSCG00000044321	snv
	1	151299267	A	C	0.515873	F0-669	edited_step	fix	intergenic_region	MODIFIER	CBLN2-ENSSSCG00000044321	ENSSSCG00000020859-ENSSSCG00000044321	snv
	1	151434579	T	C	0.420635	F0-669	edited_step	fix	intergenic_region	MODIFIER	CBLN2-ENSSSCG00000044321	ENSSSCG00000020859-ENSSSCG00000044321	snv
	1	151820353	T	G	0.01	F0-669	isolation_step	fix	intergenic_region	MODIFIER	CBLN2-ENSSSCG00000044321	ENSSSCG00000020859-ENSSSCG00000044321	snv
	1	153630155	C	A	0.513761	F0-669	nuclear_transfor_step	fix	intergenic_region	MODIFIER	DOK6-ENSSSCG00000032084	ENSSSCG00000028977-ENSSSCG00000032084	snv
	1	156189434	T	C	0.530612	F0-669	edited_step	fix	intergenic_region	MODIFIER	CDH19-CDH7	ENSSSCG00000004885-ENSSSCG00000004886	snv
	1	157162871	A	G	0.448598	F0-669	edited_step	fix	intergenic_region	MODIFIER	ENSSSCG00000045840-ENSSSCG00000041887	ENSSSCG00000045840-ENSSSCG00000041887	snv
	1	166553488	C	T	0.00833333	F0-669	isolation_step	fix	intron_variant	MODIFIER	CORO2B	ENSSSCG00000004962	snv
	1	170848168	G	T	0.516129	F0-669	edited_step	fix	intergenic_region	MODIFIER	ENSSSCG00000044807-ENSSSCG00000044677	ENSSSCG00000044807-ENSSSCG00000044677	snv
	1	171696057	G	C	0.538462	F0-669	nuclear_transfor_step	fix	intergenic_region	MODIFIER	ENSSSCG00000046377-LRFN5	ENSSSCG00000046377-ENSSSCG00000004990	snv
	1	172431863	A	G	0.0232558	F0-669	edited_step	fix	intergenic_region	MODIFIER	LRFN5-ENSSSCG00000041306	ENSSSCG00000004990-ENSSSCG00000041306	snv
	1	172654803	T	G	0.474138	F0-669	edited_step	fix	intergenic_region	MODIFIER	ENSSSCG00000041306-ENSSSCG00000037346	ENSSSCG00000041306-ENSSSCG00000037346	snv
	1	176088329	A	T	0.578431	F0-669	nuclear_transfor_step	fix	intergenic_region	MODIFIER	ENSSSCG00000043544-RPL10L	ENSSSCG00000043544-ENSSSCG00000005001	snv
	1	176110625	T	G	0.0285714	F0-669	isolation_step	fix	intergenic_region	MODIFIER	ENSSSCG00000043544-RPL10L	ENSSSCG00000043544-ENSSSCG00000005001	snv
	1	176557212	G	A	0.558824	F0-669	edited_step	fix	intergenic_region	MODIFIER	ENSSSCG00000043544-RPL10L	ENSSSCG00000043544-ENSSSCG00000005001	snv
	1	177062175	G	T	0.390805	F0-669	edited_step	fix	intron_variant	MODIFIER	MDGA2	ENSSSCG00000005002	snv
	1	177706173	T	A	0.540541	F0-669	nuclear_transfor_step	fix	intergenic_region	MODIFIER	MDGA2-ENSSSCG00000044998	ENSSSCG00000005002-ENSSSCG00000044998	snv
	1	178259037	G	A	0.008	F0-669	isolation_step	fix	intron_variant	MODIFIER	ENSSSCG00000041258	ENSSSCG00000041258	snv
	1	178711874	T	G	0.430108	F0-669	nuclear_transfor_step	fix	intergenic_region	MODIFIER	ENSSSCG00000047931-ENSSSCG00000045376	ENSSSCG00000047931-ENSSSCG00000045376	snv
	1	182778511	T	C	0.0526316	F0-669	edited_step	fix	intergenic_region	MODIFIER	DDHD1-ENSSSCG00000051102	ENSSSCG00000005043-ENSSSCG00000051102	snv
	1	183358766	A	G	0.00763359	F0-669	edited_step	fix	intergenic_region	MODIFIER	ENSSSCG00000051102-ENSSSCG00000041305	ENSSSCG00000051102-ENSSSCG00000041305	snv
	1	184952636	C	T	0.372093	F0-669	edited_step	fix	intron_variant	MODIFIER	KTN1	ENSSSCG00000005060	snv
	1	185933569	A	G	0.531532	F0-669	nuclear_transfor_step	fix	intergenic_region	MODIFIER	TMEM260-OTX2	ENSSSCG00000005062-ENSSSCG00000005063	snv
	1	187536652	T	G	0.54878	F0-669	nuclear_transfor_step	fix	intron_variant	MODIFIER	KIAA0586	ENSSSCG00000005076	snv
	1	188062064	A	C	0.0296296	F0-669	edited_step	fix	intergenic_region	MODIFIER	ENSSSCG00000048232-ENSSSCG00000005077	ENSSSCG00000048232-ENSSSCG00000005077	snv
	1	188954391	T	C	0.452991	F0-669	edited_step	fix	intergenic_region	MODIFIER	RTN1-LRRC9	ENSSSCG00000025013-ENSSSCG00000005081	snv
	1	190402208	A	T	0.417391	F0-669	nuclear_transfor_step	fix	intron_variant	MODIFIER	ENSSSCG00000005095	ENSSSCG00000005095	snv
	1	191565484	C	A	0.481132	F0-669	edited_step	fix	intron_variant	MODIFIER	NTRK3	ENSSSCG00000005106	snv
	1	193229530	C	T	0.00826446	F0-669	isolation_step	fix	intron_variant	MODIFIER	ENSSSCG00000036551	ENSSSCG00000036551	snv
	1	194487506	T	G	0.538462	F0-669	edited_step	fix	intergenic_region	MODIFIER	WDR89-PPP2R5E	ENSSSCG00000005112-ENSSSCG00000026382	snv
	1	196280512	T	G	0.469136	F0-669	nuclear_transfor_step	fix	intergenic_region	MODIFIER	PLAA-U6	ENSSSCG00000005126-ENSSSCG00000037763	snv
	1	198524865	C	A	0.227642	F0-669	edited_step	fix	intergenic_region	MODIFIER	IZUMO3-U6	ENSSSCG00000005129-ENSSSCG00000038736	snv
	1	199543516	C	G	0.484127	F0-669	edited_step	fix	non_coding_transcript_exon_variant	MODIFIER	ENSSSCG00000042598	ENSSSCG00000042598	snv
	1	199669998	G	T	0.471154	F0-669	nuclear_transfor_step	fix	intergenic_region	MODIFIER	ENSSSCG00000047728-ENSSSCG00000050021	ENSSSCG00000047728-ENSSSCG00000050021	snv
	1	199713571	T	C	0.525641	F0-669	edited_step	fix	intergenic_region	MODIFIER	ENSSSCG00000047728-ENSSSCG00000050021	ENSSSCG00000047728-ENSSSCG00000050021	snv
	1	200387006	T	G	0.366071	F0-669	nuclear_transfor_step	fix	intergenic_region	MODIFIER	ENSSSCG00000050021-DMRTA1	ENSSSCG00000050021-ENSSSCG00000005131	snv
	1	203198682	G	T	0.53271	F0-669	edited_step	fix	intron_variant	MODIFIER	SLC24A2	ENSSSCG00000005167	snv
	1	204390218	A	G	0.0075188	F0-669	isolation_step	fix	downstream_gene_variant	MODIFIER	ENSSSCG00000046590	ENSSSCG00000046590	snv
	1	208607371	A	T	0.53211	F0-669	nuclear_transfor_step	fix	intergenic_region	MODIFIER	NFIB-ENSSSCG00000051701	ENSSSCG00000005190-ENSSSCG00000051701	snv
	1	208876338	A	G	0.0168067	F0-669	edited_step	fix	intergenic_region	MODIFIER	NFIB-ENSSSCG00000051701	ENSSSCG00000005190-ENSSSCG00000051701	snv
	1	210655688	A	T	0.48913	F0-669	nuclear_transfor_step	fix	intergenic_region	MODIFIER	ENSSSCG00000048974-ENSSSCG00000047464	ENSSSCG00000048974-ENSSSCG00000047464	snv
	1	211655292	A	T	0.567308	F0-669	nuclear_transfor_step	fix	intergenic_region	MODIFIER	ENSSSCG00000050028-ENSSSCG00000045516	ENSSSCG00000050028-ENSSSCG00000045516	snv
	1	212078598	T	G	0.479592	F0-669	nuclear_transfor_step	fix	intergenic_region	MODIFIER	ENSSSCG00000041506-ENSSSCG00000047172	ENSSSCG00000041506-ENSSSCG00000047172	snv
	1	214711830	G	A	0.00746269	F0-669	edited_step	fix	intergenic_region	MODIFIER	ENSSSCG00000050722-ENSSSCG00000046128	ENSSSCG00000050722-ENSSSCG00000046128	snv
	1	214798603	T	C	0.522523	F0-669	edited_step	fix	intergenic_region	MODIFIER	ENSSSCG00000050722-ENSSSCG00000046128	ENSSSCG00000050722-ENSSSCG00000046128	snv
	1	217053624	C	A	0.00917431	F0-669	edited_step	fix	upstream_gene_variant	MODIFIER	ENSSSCG00000049920	ENSSSCG00000049920	snv
	1	220701748	A	C	0.535714	F0-669	nuclear_transfor_step	fix	intergenic_region	MODIFIER	ENSSSCG00000047233-DMRT2	ENSSSCG00000047233-ENSSSCG00000005233	snv
	1	223221044	C	A	0.449275	F0-669	edited_step	fix	intron_variant	MODIFIER	C9orf135	ENSSSCG00000035668	snv
	1	224660000	A	G	0.402597	F0-669	edited_step	fix	intron_variant	MODIFIER	TRPM3	ENSSSCG00000005257	snv
	1	226816655	A	G	0.46875	F0-669	edited_step	fix	intergenic_region	MODIFIER	ANXA1-RORB	ENSSSCG00000005267-ENSSSCG00000005268	snv
	1	229076533	A	G	0.488372	F0-669	edited_step	fix	intron_variant	MODIFIER	PCSK5	ENSSSCG00000023520	snv
	1	235917900	T	A	0.0357143	F0-669	edited_step	fix	upstream_gene_variant	MODIFIER	ENSSSCG00000005305	ENSSSCG00000005305	snv
	1	236728703	C	A	0.543478	F0-669	edited_step	fix	intron_variant	MODIFIER	ENSSSCG00000048089	ENSSSCG00000048089	snv
	1	237958069	C	T	0.0125	F0-669	isolation_step	fix	intron_variant	MODIFIER	ZCCHC7	ENSSSCG00000005346	snv
	1	238330113	G	A	0.46281	F0-669	edited_step	fix	intron_variant	MODIFIER	ENSSSCG00000050320	ENSSSCG00000050320	snv
	1	240433733	T	A	0.534653	F0-669	nuclear_transfor_step	fix	intron_variant	MODIFIER	GABBR2	ENSSSCG00000027558	snv
	1	241712541	G	T	0.431193	F0-669	edited_step	fix	intron_variant	MODIFIER	STX17	ENSSSCG00000005386	snv
	1	242222415	T	C	0.327869	F0-669	edited_step	fix	intron_variant	MODIFIER	MSANTD3-TMEFF1	ENSSSCG00000005391	snv
	1	242652955	C	A	0.101852	F0-669	edited_step	fix	intron_variant	MODIFIER	ENSSSCG00000050727	ENSSSCG00000050727	snv
	1	243158465	A	C	0.509434	F0-669	nuclear_transfor_step	fix	intergenic_region	MODIFIER	ALDOB-PGAP4	ENSSSCG00000038300-ENSSSCG00000029687	snv
	1	243848177	A	G	0.0531915	F0-669	edited_step	fix	intergenic_region	MODIFIER	ENSSSCG00000044263-ENSSSCG00000005401	ENSSSCG00000044263-ENSSSCG00000005401	snv
	1	245619401	G	T	0.462264	F0-669	nuclear_transfor_step	fix	intergenic_region	MODIFIER	SMC2-ENSSSCG00000049425	ENSSSCG00000005403-ENSSSCG00000049425	snv
	1	247624296	A	C	0.646018	F0-669	nuclear_transfor_step	fix	intergenic_region	MODIFIER	ENSSSCG00000048390-ENSSSCG00000049191	ENSSSCG00000048390-ENSSSCG00000049191	snv
	1	254059753	G	T	0.420455	F0-669	nuclear_transfor_step	fix	downstream_gene_variant	MODIFIER	C9orf43	ENSSSCG00000005479	snv
	1	256313073	T	C	0.514085	F0-669	edited_step	fix	upstream_gene_variant	MODIFIER	U6	ENSSSCG00000033066	snv
	1	256460502	G	T	0.417582	F0-669	nuclear_transfor_step	fix	intergenic_region	MODIFIER	ENSSSCG00000041599-PAPPA	ENSSSCG00000041599-ENSSSCG00000005498	snv
	1	257665326	C	G	0.483871	F0-669	edited_step	fix	intron_variant	MODIFIER	ASTN2	ENSSSCG00000005502	snv
	1	259019836	A	G	0.428571	F0-669	edited_step	fix	intergenic_region	MODIFIER	ENSSSCG00000051604-ENSSSCG00000051728	ENSSSCG00000051604-ENSSSCG00000051728	snv
	1	259182071	A	C	0.397059	F0-669	nuclear_transfor_step	fix	intergenic_region	MODIFIER	ENSSSCG00000051728-ENSSSCG00000048699	ENSSSCG00000051728-ENSSSCG00000048699	snv
	1	259305242	A	C	0.511811	F0-669	nuclear_transfor_step	fix	intergenic_region	MODIFIER	ENSSSCG00000048699-BRINP1	ENSSSCG00000048699-ENSSSCG00000005504	snv
	1	259632028	G	A	0.0144928	F0-669	edited_step	fix	intron_variant	MODIFIER	ENSSSCG00000046664	ENSSSCG00000046664	snv
	1	260325230	A	G	0.509615	F0-669	nuclear_transfor_step	fix	intergenic_region	MODIFIER	ENSSSCG00000045686-ENSSSCG00000041355	ENSSSCG00000045686-ENSSSCG00000041355	snv
	1	263466973	A	G	0.393617	F0-669	nuclear_transfor_step	fix	intergenic_region	MODIFIER	ENSSSCG00000034582-ENSSSCG00000050620	ENSSSCG00000034582-ENSSSCG00000050620	snv
	1	272003557	C	T	0.504132	F0-669	nuclear_transfor_step	fix	upstream_gene_variant	MODIFIER	ENSSSCG00000051438	ENSSSCG00000051438	snv
	1	274088574	C	A	0.346535	F0-669	nuclear_transfor_step	fix	downstream_gene_variant	MODIFIER	COL5A1	ENSSSCG00000005751	snv
	2	7787625	T	A	0.0116279	F0-669	edited_step	fix	upstream_gene_variant	MODIFIER	ENSSSCG00000013042	ENSSSCG00000013042	snv
	2	13813791	C	T	0.577586	F0-669	edited_step	fix	intergenic_region	MODIFIER	ENSSSCG00000034028-ENSSSCG00000013195	ENSSSCG00000034028-ENSSSCG00000013195	snv
	2	17072490	G	T	0.491379	F0-669	edited_step	fix	intergenic_region	MODIFIER	ENSSSCG00000045700-SYT13	ENSSSCG00000045700-ENSSSCG00000031590	snv
	2	19739732	T	A	0.53125	F0-669	edited_step	fix	intergenic_region	MODIFIER	ENSSSCG00000049087-ENSSSCG00000047796	ENSSSCG00000049087-ENSSSCG00000047796	snv
	2	20139586	C	T	0.4	F0-669	nuclear_transfor_step	fix	intergenic_region	MODIFIER	ENSSSCG00000047796-ENSSSCG00000047142	ENSSSCG00000047796-ENSSSCG00000047142	snv
	2	20714237	T	G	0.40404	F0-669	nuclear_transfor_step	fix	intergenic_region	MODIFIER	ENSSSCG00000047142-ENSSSCG00000045282	ENSSSCG00000047142-ENSSSCG00000045282	snv
	2	20982920	G	T	0.0075188	F0-669	edited_step	fix	intergenic_region	MODIFIER	ENSSSCG00000041737-LRRC4C	ENSSSCG00000041737-ENSSSCG00000013286	snv
	2	21087901	A	T	0.490566	F0-669	nuclear_transfor_step	fix	intergenic_region	MODIFIER	ENSSSCG00000041737-LRRC4C	ENSSSCG00000041737-ENSSSCG00000013286	snv
	2	22199440	G	A	0.479339	F0-669	edited_step	fix	intergenic_region	MODIFIER	ENSSSCG00000043947-ENSSSCG00000050877	ENSSSCG00000043947-ENSSSCG00000050877	snv
	2	24334334	G	T	0.514563	F0-669	nuclear_transfor_step	fix	intergenic_region	MODIFIER	ENSSSCG00000041108-ENSSSCG00000051502	ENSSSCG00000041108-ENSSSCG00000051502	snv
	2	26070208	G	T	0.507463	F0-669	edited_step	fix	upstream_gene_variant	MODIFIER	ssc-mir-1343	ENSSSCG00000020107	snv
	2	34121409	T	C	0.00763359	F0-669	edited_step	fix	intergenic_region	MODIFIER	ENSSSCG00000041023-ENSSSCG00000043436	ENSSSCG00000041023-ENSSSCG00000043436	snv
	2	34261535	A	G	0.392857	F0-669	edited_step	fix	intergenic_region	MODIFIER	ENSSSCG00000041023-ENSSSCG00000043436	ENSSSCG00000041023-ENSSSCG00000043436	snv
	2	34376393	G	C	0.0375	F0-669	edited_step	fix	intergenic_region	MODIFIER	ENSSSCG00000041023-ENSSSCG00000043436	ENSSSCG00000041023-ENSSSCG00000043436	snv
	2	35676978	G	T	0.534247	F0-669	edited_step	fix	intergenic_region	MODIFIER	LUZP2-ENSSSCG00000049346	ENSSSCG00000013341-ENSSSCG00000049346	snv
	2	35676980	A	T	0.527027	F0-669	edited_step	fix	intergenic_region	MODIFIER	LUZP2-ENSSSCG00000049346	ENSSSCG00000013341-ENSSSCG00000049346	snv
	2	36239507	A	C	0.402597	F0-669	nuclear_transfor_step	fix	intergenic_region	MODIFIER	ENSSSCG00000049346-ENSSSCG00000048778	ENSSSCG00000049346-ENSSSCG00000048778	snv
	2	37814434	C	G	0.318519	F0-669	edited_step	fix	intron_variant	MODIFIER	NELL1	ENSSSCG00000039940	snv
	2	38098222	G	T	0.545455	F0-669	nuclear_transfor_step	fix	intron_variant	MODIFIER	NELL1	ENSSSCG00000039940	snv
	2	38270355	T	C	0.52381	F0-669	nuclear_transfor_step	fix	intron_variant	MODIFIER	NELL1	ENSSSCG00000039940	snv
	2	42750123	T	A	0.0173913	F0-669	edited_step	fix	intron_variant	MODIFIER	SOX6	ENSSSCG00000034191	snv
	2	43301276	A	G	0.480392	F0-669	edited_step	fix	intron_variant	MODIFIER	ENSSSCG00000044508	ENSSSCG00000044508	snv
	2	44595271	C	T	0.508333	F0-669	nuclear_transfor_step	fix	intron_variant	MODIFIER	PDE3B	ENSSSCG00000013388	snv
	2	51584906	T	G	0.471154	F0-669	nuclear_transfor_step	fix	intergenic_region	MODIFIER	ENSSSCG00000034569-ENSSSCG00000046223	ENSSSCG00000034569-ENSSSCG00000046223	snv
	2	51837321	T	G	0.417476	F0-669	edited_step	fix	intergenic_region	MODIFIER	ENSSSCG00000043588-ENSSSCG00000026598	ENSSSCG00000043588-ENSSSCG00000026598	snv
	2	55397893	T	C	0.478261	F0-669	nuclear_transfor_step	fix	intergenic_region	MODIFIER	ENSSSCG00000046662-ENSSSCG00000034862	ENSSSCG00000046662-ENSSSCG00000034862	snv
	2	55812608	G	A	0.423529	F0-669	edited_step	fix	upstream_gene_variant	MODIFIER	ENSSSCG00000023821	ENSSSCG00000023821	snv
	2	65352759	A	C	0.522388	F0-669	nuclear_transfor_step	fix	3_prime_UTR_variant	MODIFIER	CCDC130	ENSSSCG00000013755	snv
	2	66648590	C	A	0.44	F0-669	nuclear_transfor_step	fix	downstream_gene_variant	MODIFIER	ENSSSCG00000040187	ENSSSCG00000040187	snv
	2	66958248	C	A	0.541284	F0-669	edited_step	fix	intron_variant	MODIFIER	ENSSSCG00000045115	ENSSSCG00000045115	snv
	2	68536537	A	C	0.429688	F0-669	edited_step	fix	downstream_gene_variant	MODIFIER	ENSSSCG00000046019	ENSSSCG00000046019	snv
	2	68562314	T	C	0.533333	F0-669	edited_step	fix	upstream_gene_variant	MODIFIER	ENSSSCG00000041029	ENSSSCG00000041029	snv
	2	72376251	C	A	0.444444	F0-669	edited_step	fix	intron_variant	MODIFIER	VAV1	ENSSSCG00000013553	snv
	2	77785237	C	T	0.477876	F0-669	edited_step	fix	upstream_gene_variant	MODIFIER	TPGS1	ENSSSCG00000036434	snv
	2	78848797	T	G	0.423729	F0-669	nuclear_transfor_step	fix	intron_variant	MODIFIER	MAML1	ENSSSCG00000014019	snv
	2	90425611	C	A	0.027027	F0-669	isolation_step	fix	upstream_gene_variant	MODIFIER	ENSSSCG00000048084	ENSSSCG00000048084	snv
	2	90736317	T	C	0.473214	F0-669	nuclear_transfor_step	fix	3_prime_UTR_variant	MODIFIER	ENSSSCG00000014132	ENSSSCG00000014132	snv
	2	93345402	C	G	0.596491	F0-669	edited_step	fix	intergenic_region	MODIFIER	EDIL3-COX7C	ENSSSCG00000026780-ENSSSCG00000040325	snv
	2	95813571	T	C	0.530769	F0-669	edited_step	fix	intergenic_region	MODIFIER	ENSSSCG00000050141-ENSSSCG00000038476	ENSSSCG00000050141-ENSSSCG00000038476	snv
	2	96419432	G	T	0.641026	F0-669	edited_step	fix	intron_variant	MODIFIER	ENSSSCG00000035571	ENSSSCG00000035571	snv
	2	99121588	T	G	0.490566	F0-669	nuclear_transfor_step	fix	intergenic_region	MODIFIER	ENSSSCG00000046245-ENSSSCG00000050166	ENSSSCG00000046245-ENSSSCG00000050166	snv
	2	99684694	A	G	0.395604	F0-669	nuclear_transfor_step	fix	upstream_gene_variant	MODIFIER	ENSSSCG00000046494	ENSSSCG00000046494	snv
	2	100692631	T	G	0.535088	F0-669	nuclear_transfor_step	fix	intron_variant	MODIFIER	FAM172A	ENSSSCG00000027608	snv
	2	104917916	C	A	0.52459	F0-669	edited_step	fix	intron_variant	MODIFIER	RGMB	ENSSSCG00000014176	snv
	2	106045521	C	A	0.45	F0-669	edited_step	fix	intergenic_region	MODIFIER	ENSSSCG00000042097-ENSSSCG00000049190	ENSSSCG00000042097-ENSSSCG00000049190	snv
	2	111052149	T	G	0.47191	F0-669	nuclear_transfor_step	fix	intergenic_region	MODIFIER	ENSSSCG00000049953-ENSSSCG00000051043	ENSSSCG00000049953-ENSSSCG00000051043	snv
	2	111110481	C	T	0.4125	F0-669	edited_step	fix	intergenic_region	MODIFIER	ENSSSCG00000049953-ENSSSCG00000051043	ENSSSCG00000049953-ENSSSCG00000051043	snv
	2	114716859	A	C	0.47	F0-669	edited_step	fix	intron_variant	MODIFIER	MAN2A1	ENSSSCG00000014195	snv
	2	115805177	T	G	0.439024	F0-669	nuclear_transfor_step	fix	intergenic_region	MODIFIER	ENSSSCG00000044230-ENSSSCG00000014198	ENSSSCG00000044230-ENSSSCG00000014198	snv
	2	118770732	G	T	0.45679	F0-669	edited_step	fix	intron_variant	MODIFIER	KCNN2	ENSSSCG00000014213	snv
	2	121882836	A	G	0.447059	F0-669	edited_step	fix	intergenic_region	MODIFIER	ENSSSCG00000050647-ENSSSCG00000043774	ENSSSCG00000050647-ENSSSCG00000043774	snv
	2	121979013	A	G	0.46	F0-669	edited_step	fix	intergenic_region	MODIFIER	ENSSSCG00000043774-ENSSSCG00000051343	ENSSSCG00000043774-ENSSSCG00000051343	snv
	2	124962602	C	A	0.0172414	F0-669	edited_step	fix	intron_variant	MODIFIER	ENSSSCG00000041876	ENSSSCG00000041876	snv
	2	127075858	C	A	0.228571	F0-669	edited_step	fix	intron_variant	MODIFIER	CSNK1G3	ENSSSCG00000014240	snv
	2	136000863	C	T	0.47619	F0-669	nuclear_transfor_step	fix	intron_variant	MODIFIER	FSTL4	ENSSSCG00000014293	snv
	2	136108538	G	A	0.563107	F0-669	nuclear_transfor_step	fix	intergenic_region	MODIFIER	FSTL4-ENSSSCG00000051199	ENSSSCG00000014293-ENSSSCG00000051199	snv
	2	138799839	C	T	0.496296	F0-669	edited_step	fix	downstream_gene_variant	MODIFIER	ENSSSCG00000047917	ENSSSCG00000047917	snv
	2	144467776	T	C	0.607477	F0-669	nuclear_transfor_step	fix	intron_variant	MODIFIER	ARHGAP26	ENSSSCG00000014399	snv
	2	149520150	A	G	0.343284	F0-669	edited_step	fix	intergenic_region	MODIFIER	ENSSSCG00000050945-ENSSSCG00000048904	ENSSSCG00000050945-ENSSSCG00000048904	snv
	2	149978816	G	A	0.482517	F0-669	edited_step	fix	intergenic_region	MODIFIER	HTR4-ADRB2	ENSSSCG00000014428-ENSSSCG00000038598	snv
	3	3968159	G	A	0.471429	F0-669	nuclear_transfor_step	fix	missense_variant	MODERATE	TNRC18	ENSSSCG00000022553	snv
	3	15584413	T	G	0.5625	F0-669	nuclear_transfor_step	fix	intron_variant	MODIFIER	ENSSSCG00000007733	ENSSSCG00000007733	snv
	3	19847467	C	A	0.579545	F0-669	nuclear_transfor_step	fix	intergenic_region	MODIFIER	ENSSSCG00000042734-ENSSSCG00000041175	ENSSSCG00000042734-ENSSSCG00000041175	snv
	3	21438785	A	C	0.010101	F0-669	edited_step	fix	intron_variant	MODIFIER	ENSSSCG00000044128	ENSSSCG00000044128	snv
	3	23353709	C	A	0.477477	F0-669	edited_step	fix	intron_variant	MODIFIER	HS3ST2	ENSSSCG00000036475	snv
	3	24478797	T	A	0.517483	F0-669	edited_step	fix	intron_variant	MODIFIER	ENSSSCG00000007847	ENSSSCG00000007847	snv
	3	27098876	T	C	0.531915	F0-669	nuclear_transfor_step	fix	intron_variant	MODIFIER	ENSSSCG00000042476	ENSSSCG00000042476	snv
	3	29312510	C	A	0.43	F0-669	nuclear_transfor_step	fix	intergenic_region	MODIFIER	ERCC4-ENSSSCG00000050963	ENSSSCG00000007881-ENSSSCG00000050963	snv
	3	33983948	C	A	0.495726	F0-669	edited_step	fix	intron_variant	MODIFIER	ABAT	ENSSSCG00000007909	snv
	3	34642818	G	C	0.464286	F0-669	nuclear_transfor_step	fix	intergenic_region	MODIFIER	ENSSSCG00000041437-RBFOX1	ENSSSCG00000041437-ENSSSCG00000007917	snv
	3	34734917	A	C	0.00714286	F0-669	edited_step	fix	intergenic_region	MODIFIER	ENSSSCG00000041437-RBFOX1	ENSSSCG00000041437-ENSSSCG00000007917	snv
	3	34761293	A	G	0.52459	F0-669	edited_step	fix	intergenic_region	MODIFIER	ENSSSCG00000041437-RBFOX1	ENSSSCG00000041437-ENSSSCG00000007917	snv
	3	35309665	T	G	0.531532	F0-669	nuclear_transfor_step	fix	intron_variant	MODIFIER	RBFOX1	ENSSSCG00000007917	snv
	3	35823054	T	C	0.0114943	F0-669	edited_step	fix	intron_variant	MODIFIER	RBFOX1	ENSSSCG00000007917	snv
	3	36143317	C	G	0.455285	F0-669	edited_step	fix	intron_variant	MODIFIER	RBFOX1	ENSSSCG00000007917	snv
	3	43639269	T	C	0.46875	F0-669	edited_step	fix	intergenic_region	MODIFIER	ENSSSCG00000047240-ENSSSCG00000039214	ENSSSCG00000047240-ENSSSCG00000039214	snv
	3	45733592	C	A	0.403509	F0-669	edited_step	fix	intron_variant	MODIFIER	ENSSSCG00000043219	ENSSSCG00000043219	snv
	3	48700683	A	G	0.421429	F0-669	edited_step	fix	intron_variant	MODIFIER	ST6GAL2	ENSSSCG00000008141	snv
	3	50054123	G	T	0.378151	F0-669	edited_step	fix	intergenic_region	MODIFIER	ENSSSCG00000042134-ENSSSCG00000045191	ENSSSCG00000042134-ENSSSCG00000045191	snv
	3	54149660	C	G	0.479592	F0-669	nuclear_transfor_step	fix	intron_variant	MODIFIER	REV1	ENSSSCG00000008179	snv
	3	60676617	C	A	0.464567	F0-669	edited_step	fix	intergenic_region	MODIFIER	U2-U6	ENSSSCG00000019380-ENSSSCG00000035540	snv
	3	61262327	A	T	0.550459	F0-669	edited_step	fix	intergenic_region	MODIFIER	U2-U6	ENSSSCG00000019380-ENSSSCG00000035540	snv
	3	61558486	T	C	0.508929	F0-669	nuclear_transfor_step	fix	intergenic_region	MODIFIER	U2-U6	ENSSSCG00000019380-ENSSSCG00000035540	snv
	3	61611299	A	C	0.45045	F0-669	nuclear_transfor_step	fix	intergenic_region	MODIFIER	U6-U6	ENSSSCG00000035540-ENSSSCG00000024141	snv
	3	61748411	C	T	0.46988	F0-669	nuclear_transfor_step	fix	intergenic_region	MODIFIER	U6-U6	ENSSSCG00000035540-ENSSSCG00000024141	snv
	3	61801154	G	A	0.42029	F0-669	edited_step	fix	intergenic_region	MODIFIER	U6-U6	ENSSSCG00000035540-ENSSSCG00000024141	snv
	3	64380553	G	T	0.505747	F0-669	nuclear_transfor_step	fix	intron_variant	MODIFIER	ENSSSCG00000008250	ENSSSCG00000008250	snv
	3	64657139	T	C	0.52381	F0-669	edited_step	fix	intergenic_region	MODIFIER	ENSSSCG00000008250-ENSSSCG00000037620	ENSSSCG00000008250-ENSSSCG00000037620	snv
	3	65066158	A	C	0.568807	F0-669	nuclear_transfor_step	fix	intergenic_region	MODIFIER	ENSSSCG00000022842-U1	ENSSSCG00000022842-ENSSSCG00000036252	snv
	3	65625730	G	A	0.558333	F0-669	edited_step	fix	intergenic_region	MODIFIER	U1-ENSSSCG00000042171	ENSSSCG00000036252-ENSSSCG00000042171	snv
	3	65941702	G	T	0.552083	F0-669	edited_step	fix	intergenic_region	MODIFIER	ENSSSCG00000042171-LRRTM4	ENSSSCG00000042171-ENSSSCG00000008259	snv
	3	71464161	A	T	0.463636	F0-669	nuclear_transfor_step	fix	downstream_gene_variant	MODIFIER	ENSSSCG00000045542	ENSSSCG00000045542	snv
	3	75884547	G	T	0.447917	F0-669	nuclear_transfor_step	fix	intron_variant	MODIFIER	ENSSSCG00000045708	ENSSSCG00000045708	snv
	3	83003051	C	T	0.595238	F0-669	nuclear_transfor_step	fix	intergenic_region	MODIFIER	ENSSSCG00000042483-FANCL	ENSSSCG00000042483-ENSSSCG00000008394	snv
	3	84047274	C	A	0.492063	F0-669	nuclear_transfor_step	fix	intron_variant	MODIFIER	ENSSSCG00000047652	ENSSSCG00000047652	snv
	3	88687426	T	C	0.435115	F0-669	nuclear_transfor_step	fix	intergenic_region	MODIFIER	ENSSSCG00000042900-ENSSSCG00000051467	ENSSSCG00000042900-ENSSSCG00000051467	snv
	3	88725393	T	C	0.49505	F0-669	edited_step	fix	intergenic_region	MODIFIER	ENSSSCG00000042900-ENSSSCG00000051467	ENSSSCG00000042900-ENSSSCG00000051467	snv
	3	88816869	A	C	0.423423	F0-669	nuclear_transfor_step	fix	intergenic_region	MODIFIER	ENSSSCG00000042900-ENSSSCG00000051467	ENSSSCG00000042900-ENSSSCG00000051467	snv
	3	89124845	G	A	0.490385	F0-669	edited_step	fix	intergenic_region	MODIFIER	ENSSSCG00000051467-ENSSSCG00000044218	ENSSSCG00000051467-ENSSSCG00000044218	snv
	3	89808351	A	C	0.0220588	F0-669	edited_step	fix	intron_variant	MODIFIER	NRXN1	ENSSSCG00000026180	snv
	3	90729424	A	G	0.55	F0-669	edited_step	fix	intron_variant	MODIFIER	NRXN1	ENSSSCG00000026180	snv
	3	90936989	T	A	0.4375	F0-669	nuclear_transfor_step	fix	intron_variant	MODIFIER	ENSSSCG00000046370	ENSSSCG00000046370	snv
	3	91519130	T	G	0.481818	F0-669	edited_step	fix	intron_variant	MODIFIER	ENSSSCG00000041973	ENSSSCG00000041973	snv
	3	101541010	C	T	0.517857	F0-669	nuclear_transfor_step	fix	intron_variant	MODIFIER	DHX57	ENSSSCG00000008479	snv
	3	114685176	A	C	0.00862069	F0-669	edited_step	fix	intron_variant	MODIFIER	UBXN2A	ENSSSCG00000033753	snv
	3	115446729	A	G	0.513043	F0-669	edited_step	fix	downstream_gene_variant	MODIFIER	ENSSSCG00000047947	ENSSSCG00000047947	snv
	3	116444171	A	G	0.547368	F0-669	nuclear_transfor_step	fix	upstream_gene_variant	MODIFIER	ENSSSCG00000049980	ENSSSCG00000049980	snv
	3	116562303	T	G	0.506494	F0-669	nuclear_transfor_step	fix	intergenic_region	MODIFIER	ENSSSCG00000048838-ENSSSCG00000047014	ENSSSCG00000048838-ENSSSCG00000047014	snv
	3	117242918	A	G	0.516129	F0-669	nuclear_transfor_step	fix	intergenic_region	MODIFIER	ENSSSCG00000047014-APOB	ENSSSCG00000047014-ENSSSCG00000008595	snv
	3	118319275	T	C	0.455556	F0-669	edited_step	fix	intergenic_region	MODIFIER	WDR35-OSR1	ENSSSCG00000008604-ENSSSCG00000008606	snv
	3	121433178	G	A	0.431818	F0-669	edited_step	fix	intergenic_region	MODIFIER	FAM49A-ENSSSCG00000043156	ENSSSCG00000008617-ENSSSCG00000043156	snv
	3	122541953	G	T	0.509615	F0-669	edited_step	fix	intron_variant	MODIFIER	ENSSSCG00000043020	ENSSSCG00000043020	snv
	3	127883392	G	T	0.382716	F0-669	nuclear_transfor_step	fix	intergenic_region	MODIFIER	ENSSSCG00000045758-ENSSSCG00000031948	ENSSSCG00000045758-ENSSSCG00000031948	snv
	3	129054429	G	A	0.424242	F0-669	edited_step	fix	intergenic_region	MODIFIER	CMPK2-ENSSSCG00000041655	ENSSSCG00000008647-ENSSSCG00000041655	snv
	3	129072726	T	G	0.509091	F0-669	nuclear_transfor_step	fix	upstream_gene_variant	MODIFIER	ENSSSCG00000041655	ENSSSCG00000041655	snv
	3	129597899	A	G	0.0108696	F0-669	isolation_step	fix	intron_variant	MODIFIER	ENSSSCG00000033103	ENSSSCG00000033103	snv
	3	130477287	T	C	0.438095	F0-669	edited_step	fix	intergenic_region	MODIFIER	ENSSSCG00000043096-ENSSSCG00000044606	ENSSSCG00000043096-ENSSSCG00000044606	snv
	3	132246644	C	A	0.505618	F0-669	nuclear_transfor_step	fix	intron_variant	MODIFIER	MYT1L	ENSSSCG00000029334	snv
	4	4209761	A	G	0.5	F0-669	nuclear_transfor_step	fix	intron_variant	MODIFIER	COL22A1	ENSSSCG00000005938	snv
	4	5207474	A	C	0.409524	F0-669	nuclear_transfor_step	fix	intergenic_region	MODIFIER	ENSSSCG00000033680-ENSSSCG00000044937	ENSSSCG00000033680-ENSSSCG00000044937	snv
	4	19458998	T	G	0.486486	F0-669	edited_step	fix	intergenic_region	MODIFIER	ENPP2-CCN3	ENSSSCG00000006001-ENSSSCG00000006002	snv
	4	25362555	G	A	0.457627	F0-669	edited_step	fix	intron_variant	MODIFIER	CSMD3	ENSSSCG00000031031	snv
	4	26279510	G	T	0.536842	F0-669	edited_step	fix	intergenic_region	MODIFIER	CSMD3-Metazoa_SRP	ENSSSCG00000031031-ENSSSCG00000024195	snv
	4	26688198	G	T	0.368852	F0-669	edited_step	fix	intergenic_region	MODIFIER	ENSSSCG00000050153-ENSSSCG00000050139	ENSSSCG00000050153-ENSSSCG00000050139	snv
	4	29182010	A	G	0.505155	F0-669	nuclear_transfor_step	fix	intergenic_region	MODIFIER	EMC2-EIF3E	ENSSSCG00000006032-ENSSSCG00000006033	snv
	4	32303664	T	G	0.470588	F0-669	edited_step	fix	intergenic_region	MODIFIER	ENSSSCG00000051273-LRP12	ENSSSCG00000051273-ENSSSCG00000006039	snv
	4	37007684	A	C	0.636364	F0-669	edited_step	fix	intron_variant	MODIFIER	RGS22	ENSSSCG00000006069	snv
	4	46647225	C	A	0.522124	F0-669	nuclear_transfor_step	fix	intergenic_region	MODIFIER	ENSSSCG00000051779-CALB1	ENSSSCG00000051779-ENSSSCG00000006125	snv
	4	47722663	A	G	0.552381	F0-669	edited_step	fix	intergenic_region	MODIFIER	ENSSSCG00000044847-U6	ENSSSCG00000044847-ENSSSCG00000036196	snv
	4	49958515	A	T	0.488889	F0-669	nuclear_transfor_step	fix	intron_variant	MODIFIER	CNBD1	ENSSSCG00000036161	snv
	4	51248210	C	A	0.584	F0-669	edited_step	fix	intergenic_region	MODIFIER	CA3-CA1	ENSSSCG00000006141-ENSSSCG00000040770	snv
	4	52383997	T	C	0.45977	F0-669	edited_step	fix	intron_variant	MODIFIER	RALYL	ENSSSCG00000006149	snv
	4	55035468	A	C	0.447368	F0-669	nuclear_transfor_step	fix	intergenic_region	MODIFIER	IMPA1-FABP4	ENSSSCG00000033791-ENSSSCG00000040681	snv
	4	56817272	A	G	0.485437	F0-669	nuclear_transfor_step	fix	downstream_gene_variant	MODIFIER	ENSSSCG00000050145	ENSSSCG00000050145	snv
	4	58999297	A	C	0.527473	F0-669	nuclear_transfor_step	fix	intergenic_region	MODIFIER	ENSSSCG00000033751-PEX2	ENSSSCG00000033751-ENSSSCG00000006168	snv
	4	61438977	G	T	0.513043	F0-669	nuclear_transfor_step	fix	intergenic_region	MODIFIER	ENSSSCG00000044324-ENSSSCG00000049376	ENSSSCG00000044324-ENSSSCG00000049376	snv
	4	65089075	C	A	0.01	F0-669	isolation_step	fix	intron_variant	MODIFIER	NCOA2	ENSSSCG00000006194	snv
	4	66610619	G	T	0.512397	F0-669	edited_step	fix	intron_variant	MODIFIER	C8orf34	ENSSSCG00000035887	snv
	4	68490160	C	A	0.419643	F0-669	edited_step	fix	downstream_gene_variant	MODIFIER	CRH	ENSSSCG00000006215	snv
	4	70736946	C	A	0.452381	F0-669	nuclear_transfor_step	fix	intergenic_region	MODIFIER	ENSSSCG00000049167-YTHDF3	ENSSSCG00000049167-ENSSSCG00000033144	snv
	4	74299589	C	T	0.547826	F0-669	nuclear_transfor_step	fix	downstream_gene_variant	MODIFIER	NSMAF	ENSSSCG00000006236	snv
	4	75248587	G	A	0.546296	F0-669	edited_step	fix	intron_variant	MODIFIER	ENSSSCG00000043592	ENSSSCG00000043592	snv
	4	76597399	T	G	0.0104167	F0-669	isolation_step	fix	intergenic_region	MODIFIER	ENSSSCG00000046734-ENSSSCG00000031906	ENSSSCG00000046734-ENSSSCG00000031906	snv
	4	77054903	T	C	0.34375	F0-669	nuclear_transfor_step	fix	intergenic_region	MODIFIER	ENSSSCG00000045551-MRPL15	ENSSSCG00000045551-ENSSSCG00000030578	snv
	4	83025077	T	G	0.526882	F0-669	edited_step	fix	intron_variant	MODIFIER	DCAF6	ENSSSCG00000006303	snv
	4	85108659	C	A	0.466667	F0-669	edited_step	fix	intergenic_region	MODIFIER	MGST3-RXRG	ENSSSCG00000006325-ENSSSCG00000006328	snv
	4	87642364	T	G	0.5	F0-669	edited_step	fix	intergenic_region	MODIFIER	ENSSSCG00000041209-HSD17B7	ENSSSCG00000041209-ENSSSCG00000006337	snv
	4	89967525	A	G	0.507937	F0-669	nuclear_transfor_step	fix	3_prime_UTR_variant	MODIFIER	CD84	ENSSSCG00000006381	snv
	4	91850122	A	C	0.444444	F0-669	nuclear_transfor_step	fix	upstream_gene_variant	MODIFIER	ENSSSCG00000047581	ENSSSCG00000047581	snv
	4	95205435	A	C	0.54902	F0-669	nuclear_transfor_step	fix	intron_variant	MODIFIER	CHRNB2	ENSSSCG00000006545	snv
	4	96629986	G	T	0.392	F0-669	edited_step	fix	upstream_gene_variant	MODIFIER	ENSSSCG00000049179	ENSSSCG00000049179	snv
	4	99520324	A	G	0.52795	F0-669	edited_step	fix	intron_variant	MODIFIER	RNF115	ENSSSCG00000037355	snv
	4	103973458	C	T	0.47541	F0-669	nuclear_transfor_step	fix	intron_variant	MODIFIER	CD2	ENSSSCG00000006736	snv
	4	106655277	T	C	0.449275	F0-669	edited_step	fix	upstream_gene_variant	MODIFIER	AP4B1	ENSSSCG00000006762	snv
	4	112805214	T	A	0.52381	F0-669	nuclear_transfor_step	fix	intergenic_region	MODIFIER	PRMT6-ENSSSCG00000045057	ENSSSCG00000006853-ENSSSCG00000045057	snv
	4	112942457	G	T	0.413793	F0-669	edited_step	fix	intergenic_region	MODIFIER	PRMT6-ENSSSCG00000045057	ENSSSCG00000006853-ENSSSCG00000045057	snv
	4	114276855	A	G	0.552083	F0-669	nuclear_transfor_step	fix	intergenic_region	MODIFIER	ENSSSCG00000041856-ENSSSCG00000035697	ENSSSCG00000041856-ENSSSCG00000035697	snv
	4	121358187	T	C	0.420168	F0-669	edited_step	fix	intergenic_region	MODIFIER	ENSSSCG00000049773-ENSSSCG00000006881	ENSSSCG00000049773-ENSSSCG00000006881	snv
	4	121587948	C	A	0.491525	F0-669	edited_step	fix	intergenic_region	MODIFIER	ENSSSCG00000046641-ENSSSCG00000050922	ENSSSCG00000046641-ENSSSCG00000050922	snv
	5	704590	G	T	0.44	F0-669	nuclear_transfor_step	fix	downstream_gene_variant	MODIFIER	CRELD2	ENSSSCG00000000981	snv
	5	10575380	C	A	0.458333	F0-669	nuclear_transfor_step	fix	upstream_gene_variant	MODIFIER	SSTR3	ENSSSCG00000027106	snv
	5	10646968	T	C	0.0142857	F0-669	isolation_step	fix	intron_variant	MODIFIER	ENSSSCG00000029668	ENSSSCG00000029668	snv
	5	13775112	T	A	0.447917	F0-669	nuclear_transfor_step	fix	intron_variant	MODIFIER	POLR3B	ENSSSCG00000000169	snv
	5	14109648	G	T	0.396396	F0-669	edited_step	fix	intron_variant	MODIFIER	NUAK1	ENSSSCG00000032861	snv
	5	16850429	T	C	0.391892	F0-669	edited_step	fix	intron_variant	MODIFIER	SLC4A8	ENSSSCG00000028060	snv
	5	20392018	C	A	0.509804	F0-669	nuclear_transfor_step	fix	downstream_gene_variant	MODIFIER	OR6C2	ENSSSCG00000045110	snv
	5	21613356	C	T	0.403509	F0-669	edited_step	fix	intron_variant	MODIFIER	RNF41	ENSSSCG00000000383	snv
	5	24414890	T	A	0.456	F0-669	edited_step	fix	intergenic_region	MODIFIER	ENSSSCG00000042496-ENSSSCG00000045904	ENSSSCG00000042496-ENSSSCG00000045904	snv
	5	24435685	T	C	0.487179	F0-669	nuclear_transfor_step	fix	intergenic_region	MODIFIER	ENSSSCG00000045904-ENSSSCG00000048104	ENSSSCG00000045904-ENSSSCG00000048104	snv
	5	25826929	T	C	0.553191	F0-669	edited_step	fix	intergenic_region	MODIFIER	ENSSSCG00000042934-ENSSSCG00000044956	ENSSSCG00000042934-ENSSSCG00000044956	snv
	5	25880080	T	C	0.44186	F0-669	nuclear_transfor_step	fix	intergenic_region	MODIFIER	ENSSSCG00000042934-ENSSSCG00000044956	ENSSSCG00000042934-ENSSSCG00000044956	snv
	5	31281206	T	C	0.453846	F0-669	edited_step	fix	intron_variant	MODIFIER	ENSSSCG00000042799	ENSSSCG00000042799	snv
	5	35203993	T	G	0.376471	F0-669	nuclear_transfor_step	fix	intergenic_region	MODIFIER	ENSSSCG00000046801-ENSSSCG00000036177	ENSSSCG00000046801-ENSSSCG00000036177	snv
	5	36409486	G	T	0.524752	F0-669	nuclear_transfor_step	fix	intron_variant	MODIFIER	TRHDE	ENSSSCG00000000515	snv
	5	37457424	T	C	0.421053	F0-669	nuclear_transfor_step	fix	intergenic_region	MODIFIER	ENSSSCG00000044906-KCNC2	ENSSSCG00000044906-ENSSSCG00000000516	snv
	5	37795856	C	A	0.506173	F0-669	nuclear_transfor_step	fix	intergenic_region	MODIFIER	ENSSSCG00000044906-KCNC2	ENSSSCG00000044906-ENSSSCG00000000516	snv
	5	42371624	C	T	0.394737	F0-669	edited_step	fix	intergenic_region	MODIFIER	ENSSSCG00000046199-ENSSSCG00000036980	ENSSSCG00000046199-ENSSSCG00000036980	snv
	5	43366316	A	G	0.473684	F0-669	nuclear_transfor_step	fix	intergenic_region	MODIFIER	ENSSSCG00000040992-ENSSSCG00000051665	ENSSSCG00000040992-ENSSSCG00000051665	snv
	5	43451437	C	A	0.44	F0-669	edited_step	fix	intergenic_region	MODIFIER	ENSSSCG00000051665-U6	ENSSSCG00000051665-ENSSSCG00000019262	snv
	5	46902269	C	T	0.524752	F0-669	edited_step	fix	intergenic_region	MODIFIER	INTS13-ENSSSCG00000044061	ENSSSCG00000030443-ENSSSCG00000044061	snv
	5	47658323	G	A	0.526786	F0-669	nuclear_transfor_step	fix	intergenic_region	MODIFIER	SSPN-BHLHE41	ENSSSCG00000025531-ENSSSCG00000028552	snv
	5	51268020	A	T	0.540541	F0-669	nuclear_transfor_step	fix	intron_variant	MODIFIER	ST8SIA1	ENSSSCG00000031329	snv
	5	53332093	T	G	0.385714	F0-669	nuclear_transfor_step	fix	intergenic_region	MODIFIER	ENSSSCG00000045136-AEBP2	ENSSSCG00000045136-ENSSSCG00000000587	snv
	5	53865205	T	C	0.0412371	F0-669	edited_step	fix	intron_variant	MODIFIER	PLEKHA5	ENSSSCG00000000588	snv
	5	58581781	A	G	0.387755	F0-669	nuclear_transfor_step	fix	intron_variant	MODIFIER	GRIN2B	ENSSSCG00000000614	snv
	5	59085003	C	T	0.402439	F0-669	edited_step	fix	intergenic_region	MODIFIER	GRIN2B-EMP1	ENSSSCG00000000614-ENSSSCG00000036723	snv
	5	62804245	A	G	0.45	F0-669	nuclear_transfor_step	fix	intergenic_region	MODIFIER	AICDA-APOBEC1	ENSSSCG00000000667-ENSSSCG00000000668	snv
	5	70721552	G	T	0.534653	F0-669	edited_step	fix	intergenic_region	MODIFIER	CPNE8-KIF21A	ENSSSCG00000000778-ENSSSCG00000000779	snv
	5	70912210	A	C	0.30137	F0-669	nuclear_transfor_step	fix	intron_variant	MODIFIER	KIF21A	ENSSSCG00000000779	snv
	5	72754805	A	T	0.458333	F0-669	edited_step	fix	intron_variant	MODIFIER	PDZRN4	ENSSSCG00000000791	snv
	5	72754925	G	C	0.428571	F0-669	edited_step	fix	intron_variant	MODIFIER	PDZRN4	ENSSSCG00000000791	snv
	5	73225103	T	C	0.427184	F0-669	nuclear_transfor_step	fix	intergenic_region	MODIFIER	PDZRN4-ENSSSCG00000042251	ENSSSCG00000000791-ENSSSCG00000042251	snv
	5	78813311	A	T	0.411215	F0-669	edited_step	fix	intergenic_region	MODIFIER	ENSSSCG00000034094-ENSSSCG00000032256	ENSSSCG00000034094-ENSSSCG00000032256	snv
	5	83426590	G	T	0.513274	F0-669	edited_step	fix	intron_variant	MODIFIER	ANO4	ENSSSCG00000000873	snv
	5	83456096	C	A	0.542056	F0-669	nuclear_transfor_step	fix	intron_variant	MODIFIER	ANO4	ENSSSCG00000000873	snv
	5	86133226	G	A	0.485149	F0-669	nuclear_transfor_step	fix	intergenic_region	MODIFIER	ENSSSCG00000047916-ENSSSCG00000050424	ENSSSCG00000047916-ENSSSCG00000050424	snv
	5	87962524	C	A	0.448819	F0-669	nuclear_transfor_step	fix	intergenic_region	MODIFIER	METAP2-ENSSSCG00000043260	ENSSSCG00000030608-ENSSSCG00000043260	snv
	5	90992397	C	A	0.478632	F0-669	edited_step	fix	intron_variant	MODIFIER	BTG1	ENSSSCG00000035790	snv
	5	93790487	T	A	0.529412	F0-669	nuclear_transfor_step	fix	intergenic_region	MODIFIER	ENSSSCG00000042946-KITLG	ENSSSCG00000042946-ENSSSCG00000035495	snv
	5	95136504	G	T	0.447368	F0-669	nuclear_transfor_step	fix	intron_variant	MODIFIER	ENSSSCG00000044094	ENSSSCG00000044094	snv
	5	99915387	G	T	0.440678	F0-669	edited_step	fix	intron_variant	MODIFIER	PPFIA2	ENSSSCG00000000940	snv
	5	100158143	A	C	0.00826446	F0-669	edited_step	fix	intron_variant	MODIFIER	PPFIA2	ENSSSCG00000000940	snv
	5	102921939	G	A	0.407767	F0-669	edited_step	fix	intergenic_region	MODIFIER	ENSSSCG00000050309-NAV3	ENSSSCG00000050309-ENSSSCG00000029249	snv
	6	9118176	G	T	0.508772	F0-669	nuclear_transfor_step	fix	intron_variant	MODIFIER	WWOX	ENSSSCG00000027415	snv
	6	10671776	A	C	0.523438	F0-669	nuclear_transfor_step	fix	intergenic_region	MODIFIER	ADAMTS18-ENSSSCG00000002700	ENSSSCG00000038627-ENSSSCG00000002700	snv
	6	11516386	T	C	0.609756	F0-669	edited_step	fix	intron_variant	MODIFIER	ENSSSCG00000023125	ENSSSCG00000023125	snv
	6	18272609	A	G	0.550459	F0-669	nuclear_transfor_step	fix	intergenic_region	MODIFIER	CDH3-ZFP90	ENSSSCG00000023162-ENSSSCG00000032372	snv
	6	21154539	G	A	0.547368	F0-669	nuclear_transfor_step	fix	5_prime_UTR_variant	MODIFIER	ENSSSCG00000044968	ENSSSCG00000044968	snv
	6	21321827	C	A	0.5	F0-669	edited_step	fix	intergenic_region	MODIFIER	ENSSSCG00000042954-ENSSSCG00000049308	ENSSSCG00000042954-ENSSSCG00000049308	snv
	6	22249895	A	T	0.45098	F0-669	nuclear_transfor_step	fix	intergenic_region	MODIFIER	ENSSSCG00000045327-ENSSSCG00000046861	ENSSSCG00000045327-ENSSSCG00000046861	snv
	6	22314958	T	G	0.492308	F0-669	nuclear_transfor_step	fix	intergenic_region	MODIFIER	ENSSSCG00000045327-ENSSSCG00000046861	ENSSSCG00000045327-ENSSSCG00000046861	snv
	6	29001164	A	G	0.535433	F0-669	nuclear_transfor_step	fix	intron_variant	MODIFIER	SMPD3	ENSSSCG00000002764	snv
	6	31017578	G	A	0.00714286	F0-669	edited_step	fix	intergenic_region	MODIFIER	ENSSSCG00000048061-IRX3	ENSSSCG00000048061-ENSSSCG00000002831	snv
	6	33137661	A	T	0.455285	F0-669	nuclear_transfor_step	fix	intergenic_region	MODIFIER	ENSSSCG00000042804-ENSSSCG00000042676	ENSSSCG00000042804-ENSSSCG00000042676	snv
	6	35140894	T	C	0.529412	F0-669	nuclear_transfor_step	fix	intron_variant	MODIFIER	ZNF423	ENSSSCG00000002838	snv
	6	38599291	T	G	0.4375	F0-669	edited_step	fix	intergenic_region	MODIFIER	U6-ENSSSCG00000044959	ENSSSCG00000032627-ENSSSCG00000044959	snv
	6	43824255	A	G	0.5	F0-669	edited_step	fix	intergenic_region	MODIFIER	U6-LSM14A	ENSSSCG00000020090-ENSSSCG00000002869	snv
	6	48780253	C	A	0.539216	F0-669	edited_step	fix	intron_variant	MODIFIER	ENSSSCG00000037494	ENSSSCG00000037494	snv
	6	49314073	A	T	0.539474	F0-669	edited_step	fix	missense_variant	MODERATE	HNRNPUL1	ENSSSCG00000030049	snv
	6	49314124	C	T	0.56338	F0-669	edited_step	fix	missense_variant	MODERATE	HNRNPUL1	ENSSSCG00000030049	snv
	6	56840148	G	A	0.494118	F0-669	nuclear_transfor_step	fix	intergenic_region	MODIFIER	ENSSSCG00000040389-ENSSSCG00000048456	ENSSSCG00000040389-ENSSSCG00000048456	snv
	6	60141965	A	G	0.472868	F0-669	nuclear_transfor_step	fix	intergenic_region	MODIFIER	ENSSSCG00000032895-ENSSSCG00000048710	ENSSSCG00000032895-ENSSSCG00000048710	snv
	6	65375529	A	C	0.487395	F0-669	nuclear_transfor_step	fix	intergenic_region	MODIFIER	C1orf174-ssc-mir-4331-1	ENSSSCG00000031102-ENSSSCG00000037834	snv
	6	65477007	G	T	0.378641	F0-669	nuclear_transfor_step	fix	intergenic_region	MODIFIER	ssc-mir-4331-1-ENSSSCG00000048371	ENSSSCG00000037834-ENSSSCG00000048371	snv
	6	67794737	T	C	0.459677	F0-669	nuclear_transfor_step	fix	intron_variant	MODIFIER	CAMTA1	ENSSSCG00000036772	snv
	6	68383238	G	T	0.48	F0-669	edited_step	fix	intron_variant	MODIFIER	CAMTA1	ENSSSCG00000036772	snv
	6	73557976	A	G	0.482143	F0-669	edited_step	fix	intron_variant	MODIFIER	KAZN	ENSSSCG00000037676	snv
	6	73802510	C	A	0.530612	F0-669	nuclear_transfor_step	fix	intron_variant	MODIFIER	KAZN	ENSSSCG00000037676	snv
	6	76339607	T	G	0.478261	F0-669	nuclear_transfor_step	fix	intron_variant	MODIFIER	ACTL8	ENSSSCG00000024062	snv
	6	90496716	G	T	0.363636	F0-669	edited_step	fix	intergenic_region	MODIFIER	C1orf94-ENSSSCG00000043999	ENSSSCG00000003623-ENSSSCG00000043999	snv
	6	92070275	A	G	0.423358	F0-669	nuclear_transfor_step	fix	intron_variant	MODIFIER	AGO1	ENSSSCG00000003630	snv
	6	93921818	C	T	0.382353	F0-669	edited_step	fix	intron_variant	MODIFIER	INPP5B	ENSSSCG00000003642	snv
	6	94352673	C	T	0.1875	F0-669	edited_step	fix	intergenic_region	MODIFIER	POU3F1-ENSSSCG00000044365	ENSSSCG00000003646-ENSSSCG00000044365	snv
	6	94528447	T	A	0.513274	F0-669	nuclear_transfor_step	fix	intergenic_region	MODIFIER	POU3F1-ENSSSCG00000044365	ENSSSCG00000003646-ENSSSCG00000044365	snv
	6	100171694	A	C	0.482143	F0-669	nuclear_transfor_step	fix	downstream_gene_variant	MODIFIER	ENSSSCG00000043385	ENSSSCG00000043385	snv
	6	100809028	T	G	0.0114943	F0-669	edited_step	fix	intergenic_region	MODIFIER	ENSSSCG00000041268-ENSSSCG00000045748	ENSSSCG00000041268-ENSSSCG00000045748	snv
	6	103806715	C	A	0.506024	F0-669	nuclear_transfor_step	fix	downstream_gene_variant	MODIFIER	SMCHD1	ENSSSCG00000029030	snv
	6	104534513	T	G	0.0102041	F0-669	edited_step	fix	intron_variant	MODIFIER	METTL4	ENSSSCG00000034816	snv
	6	107447739	C	A	0.454545	F0-669	edited_step	fix	intergenic_region	MODIFIER	GATA6-ENSSSCG00000003703	ENSSSCG00000003702-ENSSSCG00000003703	snv
	6	108958500	G	T	0.492063	F0-669	nuclear_transfor_step	fix	intron_variant	MODIFIER	TTC39C	ENSSSCG00000003710	snv
	6	112225217	T	A	0.453846	F0-669	edited_step	fix	intergenic_region	MODIFIER	ENSSSCG00000042906-CDH2	ENSSSCG00000042906-ENSSSCG00000003722	snv
	6	113043326	C	T	0.491525	F0-669	edited_step	fix	intergenic_region	MODIFIER	ENSSSCG00000051156-U6	ENSSSCG00000051156-ENSSSCG00000019533	snv
	6	113062537	T	C	0.44086	F0-669	nuclear_transfor_step	fix	intergenic_region	MODIFIER	ENSSSCG00000051156-U6	ENSSSCG00000051156-ENSSSCG00000019533	snv
	6	113280005	C	A	0.508929	F0-669	edited_step	fix	intergenic_region	MODIFIER	ENSSSCG00000051156-U6	ENSSSCG00000051156-ENSSSCG00000019533	snv
	6	117613349	A	T	0.0152672	F0-669	isolation_step	fix	intergenic_region	MODIFIER	ENSSSCG00000045992-NOL4	ENSSSCG00000045992-ENSSSCG00000003737	snv
	6	118271999	A	C	0.529412	F0-669	nuclear_transfor_step	fix	intron_variant	MODIFIER	NOL4	ENSSSCG00000003737	snv
	6	118612808	G	T	0.491803	F0-669	edited_step	fix	intron_variant	MODIFIER	DTNA	ENSSSCG00000028047	snv
	6	121900656	T	C	0.509434	F0-669	nuclear_transfor_step	fix	intergenic_region	MODIFIER	ENSSSCG00000045450-ENSSSCG00000049226	ENSSSCG00000045450-ENSSSCG00000049226	snv
	6	122185604	C	A	0.557692	F0-669	nuclear_transfor_step	fix	intergenic_region	MODIFIER	ENSSSCG00000045450-ENSSSCG00000049226	ENSSSCG00000045450-ENSSSCG00000049226	snv
	6	124385718	G	T	0.445255	F0-669	edited_step	fix	intergenic_region	MODIFIER	ENSSSCG00000042944-ENSSSCG00000047699	ENSSSCG00000042944-ENSSSCG00000047699	snv
	6	124569894	T	G	0.508929	F0-669	edited_step	fix	intergenic_region	MODIFIER	ENSSSCG00000042944-ENSSSCG00000047699	ENSSSCG00000042944-ENSSSCG00000047699	snv
	6	126245620	G	T	0.422018	F0-669	edited_step	fix	intergenic_region	MODIFIER	ENSSSCG00000037233-SYT4	ENSSSCG00000037233-ENSSSCG00000037079	snv
	6	126470993	G	C	0.5	F0-669	edited_step	fix	intergenic_region	MODIFIER	ENSSSCG00000037233-SYT4	ENSSSCG00000037233-ENSSSCG00000037079	snv
	6	127704367	C	T	0.507463	F0-669	edited_step	fix	intergenic_region	MODIFIER	SYT4-KCNG2	ENSSSCG00000037079-ENSSSCG00000005780	snv
	6	129040023	A	T	0.491935	F0-669	nuclear_transfor_step	fix	intergenic_region	MODIFIER	LPAR3-SSX2IP	ENSSSCG00000003756-ENSSSCG00000003757	snv
	6	130269678	A	G	0.363636	F0-669	edited_step	fix	intergenic_region	MODIFIER	U6-ENSSSCG00000044932	ENSSSCG00000035517-ENSSSCG00000044932	snv
	6	130269746	A	G	0.409524	F0-669	edited_step	fix	intergenic_region	MODIFIER	U6-ENSSSCG00000044932	ENSSSCG00000035517-ENSSSCG00000044932	snv
	6	132622272	A	G	0.526786	F0-669	nuclear_transfor_step	fix	intergenic_region	MODIFIER	ADGRL2-U1	ENSSSCG00000003761-ENSSSCG00000050555	snv
	6	133870840	C	A	0.470588	F0-669	edited_step	fix	intergenic_region	MODIFIER	ENSSSCG00000027421-ENSSSCG00000043601	ENSSSCG00000027421-ENSSSCG00000043601	snv
	6	135584957	A	T	0.466019	F0-669	nuclear_transfor_step	fix	intron_variant	MODIFIER	USP33	ENSSSCG00000040220	snv
	6	137305895	T	A	0.550459	F0-669	edited_step	fix	intergenic_region	MODIFIER	U6-ASB17	ENSSSCG00000024120-ENSSSCG00000031522	snv
	6	140422136	T	A	0.461538	F0-669	nuclear_transfor_step	fix	intergenic_region	MODIFIER	ENSSSCG00000050694-ENSSSCG00000032901	ENSSSCG00000050694-ENSSSCG00000032901	snv
	6	141935323	C	A	0.488	F0-669	nuclear_transfor_step	fix	intron_variant	MODIFIER	ZRANB2	ENSSSCG00000003787	snv
	6	144416508	C	A	0.122807	F0-669	edited_step	fix	intron_variant	MODIFIER	WLS	ENSSSCG00000003795	snv
	6	145924516	T	A	0.0357143	F0-669	edited_step	fix	intron_variant	MODIFIER	SGIP1	ENSSSCG00000025243	snv
	6	147285685	A	C	0.471698	F0-669	nuclear_transfor_step	fix	intergenic_region	MODIFIER	AK4-ENSSSCG00000047798	ENSSSCG00000040337-ENSSSCG00000047798	snv
	6	150449638	A	C	0.552239	F0-669	nuclear_transfor_step	fix	intron_variant	MODIFIER	PATJ	ENSSSCG00000039793	snv
	6	152310406	T	C	0.453704	F0-669	nuclear_transfor_step	fix	intergenic_region	MODIFIER	C1orf87-CYP2J34	ENSSSCG00000003823-ENSSSCG00000003825	snv
	6	153034369	G	A	0.548387	F0-669	nuclear_transfor_step	fix	intron_variant	MODIFIER	FGGY	ENSSSCG00000003828	snv
	6	153408811	G	A	0.56044	F0-669	edited_step	fix	intron_variant	MODIFIER	ENSSSCG00000049208	ENSSSCG00000049208	snv
	6	153735050	T	G	0.486239	F0-669	nuclear_transfor_step	fix	intergenic_region	MODIFIER	ENSSSCG00000031912-MYSM1	ENSSSCG00000031912-ENSSSCG00000003830	snv
	6	155778438	T	C	0.576923	F0-669	nuclear_transfor_step	fix	intergenic_region	MODIFIER	PRKAA2-ENSSSCG00000003839	ENSSSCG00000036145-ENSSSCG00000003839	snv
	6	156501695	A	G	0.505882	F0-669	nuclear_transfor_step	fix	intergenic_region	MODIFIER	ENSSSCG00000047160-ENSSSCG00000042401	ENSSSCG00000047160-ENSSSCG00000042401	snv
	6	163813466	C	T	0.509434	F0-669	edited_step	fix	intron_variant	MODIFIER	TRABD2B	ENSSSCG00000037318	snv
	6	168947724	T	G	0.438202	F0-669	edited_step	fix	intron_variant	MODIFIER	RIMKLA	ENSSSCG00000003968	snv
	6	170591109	T	C	0.505618	F0-669	nuclear_transfor_step	fix	intron_variant	MODIFIER	ENSSSCG00000051244	ENSSSCG00000051244	snv
	7	5677360	A	C	0.508065	F0-669	edited_step	fix	downstream_gene_variant	MODIFIER	ENSSSCG00000045480	ENSSSCG00000045480	snv
	7	5677362	A	G	0.52381	F0-669	edited_step	fix	downstream_gene_variant	MODIFIER	ENSSSCG00000045480	ENSSSCG00000045480	snv
	7	6014941	T	C	0.461538	F0-669	nuclear_transfor_step	fix	intergenic_region	MODIFIER	ENSSSCG00000050414-ENSSSCG00000045825	ENSSSCG00000050414-ENSSSCG00000045825	snv
	7	13463907	T	A	0.40367	F0-669	nuclear_transfor_step	fix	intron_variant	MODIFIER	NUP153	ENSSSCG00000026034	snv
	7	14061262	G	C	0.00869565	F0-669	isolation_step	fix	intron_variant	MODIFIER	RNF144B	ENSSSCG00000001076	snv
	7	15490846	G	A	0.446281	F0-669	edited_step	fix	intron_variant	MODIFIER	ENSSSCG00000048413	ENSSSCG00000048413	snv
	7	17186343	T	C	0.54902	F0-669	edited_step	fix	intron_variant	MODIFIER	ENSSSCG00000049691	ENSSSCG00000049691	snv
	7	27477411	A	C	0.518519	F0-669	nuclear_transfor_step	fix	intron_variant	MODIFIER	KHDRBS2	ENSSSCG00000001490	snv
	7	27665652	A	T	0.5	F0-669	nuclear_transfor_step	fix	intron_variant	MODIFIER	KHDRBS2	ENSSSCG00000001490	snv
	7	27721225	C	A	0.572816	F0-669	nuclear_transfor_step	fix	intron_variant	MODIFIER	KHDRBS2	ENSSSCG00000001490	snv
	7	34270122	T	C	0.549296	F0-669	nuclear_transfor_step	fix	intergenic_region	MODIFIER	ENSSSCG00000047307-ENSSSCG00000043280	ENSSSCG00000047307-ENSSSCG00000043280	snv
	7	35737015	G	C	0.368421	F0-669	edited_step	fix	intron_variant	MODIFIER	LRFN2	ENSSSCG00000001597	snv
	7	41678960	G	T	0.00819672	F0-669	edited_step	fix	intron_variant	MODIFIER	ADGRF5	ENSSSCG00000001725	snv
	7	44134778	C	A	0.516667	F0-669	nuclear_transfor_step	fix	intergenic_region	MODIFIER	ENSSSCG00000036460-TFAP2D	ENSSSCG00000036460-ENSSSCG00000001744	snv
	7	47431413	C	T	0.0075188	F0-669	isolation_step	fix	downstream_gene_variant	MODIFIER	PSMA4	ENSSSCG00000036924	snv
	7	48963267	G	T	0.571429	F0-669	nuclear_transfor_step	fix	upstream_gene_variant	MODIFIER	ZFAND6	ENSSSCG00000001779	snv
	7	54801620	C	T	0.44898	F0-669	edited_step	fix	upstream_gene_variant	MODIFIER	RLBP1	ENSSSCG00000001836	snv
	7	57540135	G	A	0.279793	F0-669	edited_step	fix	intron_variant	MODIFIER	HMG20A	ENSSSCG00000001871	snv
	7	57551886	C	A	0.41206	F0-669	edited_step	fix	intron_variant	MODIFIER	HMG20A	ENSSSCG00000001871	snv
	7	57554535	C	T	0.364583	F0-669	edited_step	fix	synonymous_variant	LOW	HMG20A	ENSSSCG00000001871	snv
	7	57554896	T	G	0.325843	F0-669	edited_step	fix	intron_variant	MODIFIER	HMG20A	ENSSSCG00000001871	snv
	7	60398854	T	C	0.486239	F0-669	nuclear_transfor_step	fix	intergenic_region	MODIFIER	NEO1-ENSSSCG00000043364	ENSSSCG00000001921-ENSSSCG00000043364	snv
	7	61623920	T	C	0.445545	F0-669	edited_step	fix	intergenic_region	MODIFIER	ENSSSCG00000050670-ENSSSCG00000050247	ENSSSCG00000050670-ENSSSCG00000050247	snv
	7	70436804	T	G	0.54717	F0-669	nuclear_transfor_step	fix	intergenic_region	MODIFIER	ENSSSCG00000046303-ENSSSCG00000048734	ENSSSCG00000046303-ENSSSCG00000048734	snv
	7	71882430	C	T	0.638889	F0-669	nuclear_transfor_step	fix	intergenic_region	MODIFIER	ENSSSCG00000046287-ENSSSCG00000045129	ENSSSCG00000046287-ENSSSCG00000045129	snv
	7	71882470	C	T	0.5	F0-669	nuclear_transfor_step	fix	intergenic_region	MODIFIER	ENSSSCG00000046287-ENSSSCG00000045129	ENSSSCG00000046287-ENSSSCG00000045129	snv
	7	71884271	G	T	0.0168067	F0-669	edited_step	fix	intergenic_region	MODIFIER	ENSSSCG00000046287-ENSSSCG00000045129	ENSSSCG00000046287-ENSSSCG00000045129	snv
	7	73770453	T	G	0.403509	F0-669	nuclear_transfor_step	fix	intergenic_region	MODIFIER	ENSSSCG00000050981-ENSSSCG00000042623	ENSSSCG00000050981-ENSSSCG00000042623	snv
	7	79530020	T	C	0.473684	F0-669	nuclear_transfor_step	fix	downstream_gene_variant	MODIFIER	ENSSSCG00000002175	ENSSSCG00000002175	snv
	7	80058973	G	T	0.0384615	F0-669	isolation_step	fix	upstream_gene_variant	MODIFIER	ENSSSCG00000042460	ENSSSCG00000042460	snv
	7	80841143	G	T	0.141304	F0-669	edited_step	fix	missense_variant&splice_region_variant	MODERATE	RYR3	ENSSSCG00000033958	snv
	7	82288013	A	G	0.470588	F0-669	nuclear_transfor_step	fix	intergenic_region	MODIFIER	ENSSSCG00000048658-ENSSSCG00000051077	ENSSSCG00000048658-ENSSSCG00000051077	snv
	7	84726572	A	G	0.030303	F0-669	edited_step	fix	3_prime_UTR_variant	MODIFIER	MCTP2	ENSSSCG00000002257	snv
	7	85815316	C	A	0.432836	F0-669	edited_step	fix	intergenic_region	MODIFIER	ENSSSCG00000049154-RGMA	ENSSSCG00000049154-ENSSSCG00000002267	snv
	7	93739105	A	G	0.5	F0-669	nuclear_transfor_step	fix	intron_variant	MODIFIER	SLC8A3	ENSSSCG00000002315	snv
	7	93739141	A	T	0.494845	F0-669	nuclear_transfor_step	fix	intron_variant	MODIFIER	SLC8A3	ENSSSCG00000002315	snv
	7	94388239	G	A	0.5	F0-669	nuclear_transfor_step	fix	intron_variant	MODIFIER	ENSSSCG00000041631	ENSSSCG00000041631	snv
	7	95467207	G	A	0.0166667	F0-669	edited_step	fix	intron_variant	MODIFIER	RGS6	ENSSSCG00000033093	snv
	7	102303951	C	A	0.486957	F0-669	edited_step	fix	intron_variant	MODIFIER	NRXN3	ENSSSCG00000028942	snv
	7	102509478	G	T	0.44898	F0-669	nuclear_transfor_step	fix	intron_variant	MODIFIER	NRXN3	ENSSSCG00000028942	snv
	7	103307436	T	C	0.38835	F0-669	nuclear_transfor_step	fix	intron_variant	MODIFIER	DIO2	ENSSSCG00000040638	snv
	7	103442061	A	C	0.469231	F0-669	edited_step	fix	intron_variant	MODIFIER	CEP128	ENSSSCG00000002410	snv
	7	105015970	C	A	0.439716	F0-669	edited_step	fix	intergenic_region	MODIFIER	ENSSSCG00000049060-ENSSSCG00000047447	ENSSSCG00000049060-ENSSSCG00000047447	snv
	7	106468848	C	G	0.44186	F0-669	nuclear_transfor_step	fix	intergenic_region	MODIFIER	ENSSSCG00000043996-ENSSSCG00000044398	ENSSSCG00000043996-ENSSSCG00000044398	snv
	7	106469016	T	C	0.436893	F0-669	nuclear_transfor_step	fix	intergenic_region	MODIFIER	ENSSSCG00000043996-ENSSSCG00000044398	ENSSSCG00000043996-ENSSSCG00000044398	snv
	7	108143940	G	T	0.0192308	F0-669	edited_step	fix	intergenic_region	MODIFIER	FLRT2-ENSSSCG00000043565	ENSSSCG00000040166-ENSSSCG00000043565	snv
	7	108332320	G	C	0.461538	F0-669	nuclear_transfor_step	fix	downstream_gene_variant	MODIFIER	ENSSSCG00000043565	ENSSSCG00000043565	snv
	7	110566029	G	A	0.446281	F0-669	edited_step	fix	intron_variant	MODIFIER	EML5	ENSSSCG00000002427	snv
	7	117009418	A	G	0.415094	F0-669	nuclear_transfor_step	fix	intergenic_region	MODIFIER	ENSSSCG00000002498-ENSSSCG00000033807	ENSSSCG00000002498-ENSSSCG00000033807	snv
	7	117812661	A	G	0.443548	F0-669	nuclear_transfor_step	fix	intergenic_region	MODIFIER	PAPOLA-ENSSSCG00000049650	ENSSSCG00000002505-ENSSSCG00000049650	snv
	7	119713007	A	G	0.0125	F0-669	edited_step	fix	intergenic_region	MODIFIER	ENSSSCG00000039414-ENSSSCG00000048324	ENSSSCG00000039414-ENSSSCG00000048324	snv
	8	5273579	G	T	0.512821	F0-669	nuclear_transfor_step	fix	intron_variant	MODIFIER	STK32B	ENSSSCG00000035020	snv
	8	6757222	A	C	0.00729927	F0-669	edited_step	fix	intron_variant	MODIFIER	CLNK	ENSSSCG00000022448	snv
	8	7138094	T	C	0.578431	F0-669	nuclear_transfor_step	fix	intergenic_region	MODIFIER	ENSSSCG00000043858-ENSSSCG00000046066	ENSSSCG00000043858-ENSSSCG00000046066	snv
	8	7534165	T	C	0.510791	F0-669	edited_step	fix	intergenic_region	MODIFIER	ENSSSCG00000051157-ENSSSCG00000049250	ENSSSCG00000051157-ENSSSCG00000049250	snv
	8	7761690	C	A	0.494253	F0-669	edited_step	fix	intergenic_region	MODIFIER	ENSSSCG00000046069-ENSSSCG00000039778	ENSSSCG00000046069-ENSSSCG00000039778	snv
	8	8052662	T	G	0.513514	F0-669	edited_step	fix	intergenic_region	MODIFIER	ENSSSCG00000046069-ENSSSCG00000039778	ENSSSCG00000046069-ENSSSCG00000039778	snv
	8	8623526	C	T	0.0536913	F0-669	edited_step	fix	intergenic_region	MODIFIER	ENSSSCG00000035927-ENSSSCG00000046467	ENSSSCG00000035927-ENSSSCG00000046467	snv
	8	11405690	C	A	0.460674	F0-669	nuclear_transfor_step	fix	intron_variant	MODIFIER	TAPT1	ENSSSCG00000021828	snv
	8	11742577	A	T	0.513043	F0-669	edited_step	fix	intron_variant	MODIFIER	LDB2	ENSSSCG00000029227	snv
	8	12234743	A	C	0.438095	F0-669	nuclear_transfor_step	fix	intergenic_region	MODIFIER	LDB2-QDPR	ENSSSCG00000029227-ENSSSCG00000034811	snv
	8	12895843	G	T	0.155963	F0-669	edited_step	fix	intron_variant	MODIFIER	ENSSSCG00000008748	ENSSSCG00000008748	snv
	8	15335996	G	A	0.486486	F0-669	edited_step	fix	intron_variant	MODIFIER	KCNIP4	ENSSSCG00000023934	snv
	8	19755843	T	G	0.48	F0-669	nuclear_transfor_step	fix	intergenic_region	MODIFIER	ENSSSCG00000040571-RBPJ	ENSSSCG00000040571-ENSSSCG00000022155	snv
	8	20673044	C	A	0.521739	F0-669	nuclear_transfor_step	fix	intergenic_region	MODIFIER	ENSSSCG00000046468-ENSSSCG00000047494	ENSSSCG00000046468-ENSSSCG00000047494	snv
	8	22678771	C	T	0.510204	F0-669	edited_step	fix	intergenic_region	MODIFIER	ENSSSCG00000046430-ENSSSCG00000045318	ENSSSCG00000046430-ENSSSCG00000045318	snv
	8	24667466	G	A	0.517241	F0-669	edited_step	fix	intergenic_region	MODIFIER	PCDH7-ENSSSCG00000008767	ENSSSCG00000008765-ENSSSCG00000008767	snv
	8	26095875	G	T	0.413793	F0-669	edited_step	fix	intergenic_region	MODIFIER	PCDH7-ENSSSCG00000008767	ENSSSCG00000008765-ENSSSCG00000008767	snv
	8	26873425	G	T	0.108108	F0-669	edited_step	fix	intergenic_region	MODIFIER	ENSSSCG00000008767-ENSSSCG00000045669	ENSSSCG00000008767-ENSSSCG00000045669	snv
	8	27179048	A	C	0.53211	F0-669	nuclear_transfor_step	fix	intergenic_region	MODIFIER	ENSSSCG00000050356-ARAP2	ENSSSCG00000050356-ENSSSCG00000008768	snv
	8	28728793	T	G	0.46	F0-669	nuclear_transfor_step	fix	intergenic_region	MODIFIER	ENSSSCG00000050127-NWD2	ENSSSCG00000050127-ENSSSCG00000008770	snv
	8	31902665	A	G	0.010101	F0-669	isolation_step	fix	intron_variant	MODIFIER	NSUN7	ENSSSCG00000024496	snv
	8	31916782	C	T	0.60241	F0-669	nuclear_transfor_step	fix	downstream_gene_variant	MODIFIER	APBB2	ENSSSCG00000022168	snv
	8	32656076	A	C	0.467391	F0-669	nuclear_transfor_step	fix	intron_variant	MODIFIER	LIMCH1	ENSSSCG00000008799	snv
	8	33513750	T	C	0.452991	F0-669	nuclear_transfor_step	fix	intron_variant	MODIFIER	ATP8A1	ENSSSCG00000008803	snv
	8	34741332	C	T	0.544304	F0-669	edited_step	fix	intergenic_region	MODIFIER	ENSSSCG00000037522-KCTD8	ENSSSCG00000037522-ENSSSCG00000035712	snv
	8	35531021	T	G	0.479675	F0-669	nuclear_transfor_step	fix	intergenic_region	MODIFIER	ENSSSCG00000041014-U6	ENSSSCG00000041014-ENSSSCG00000029103	snv
[truncated: 4,024 more rows]
