# Supplementary material for: Genome-wide genetic mutations accumulated in genome-edited pigs and their filial generation for xenotransplantation
Source: Research Square preprint supplement (doi:10.21203/rs.3.rs-3139100/v1), 2023-07-18
Supplement: Supplementary file 3 [file a3e82fc86fc0fde2ca36b017.xlsx]

## Sheet: Sheet1
	Supplementary Data 3 | SNVs and Indels accumulated in different conditions of CRISPR/Cas9 step.
	chrom	locus	ref	alt	VAF	case	step	fix_type	annotation	annotation_Impact	gene_name	gene_id	type
	3	17541370	A	G	0.444444	WZS01853-ZF3_153-Cas9	control_CRISPR	somatic	missense_variant	MODERATE	CTF1	ENSSSCG00000007774	snv
	5	49959193	T	G	0.552083	WZS01853-ZF3_153-Cas9	control_CRISPR	somatic	intron_variant	MODIFIER	SOX5	ENSSSCG00000000567	snv
	6	115391891	A	G	0.301887	WZS01853-ZF3_153-Cas9	control_CRISPR	somatic	intergenic_region	MODIFIER	DSG3-DSG2	ENSSSCG00000027160-ENSSSCG00000022739	snv
	8	129296824	T	C	0.410714	WZS01853-ZF3_153-Cas9	control_CRISPR	somatic	intron_variant	MODIFIER	SNCA	ENSSSCG00000009203	snv
	15	32879602	G	T	0.514851	WZS01853-ZF3_153-Cas9	control_CRISPR	somatic	intron_variant	MODIFIER	ENSSSCG00000015746	ENSSSCG00000015746	snv
	13	38004807	AT	A	0.545455	WZS01853-ZF3_153-Cas9	control_CRISPR	somatic	intron_variant	MODIFIER	ERC2	ENSSSCG00000024417	indel
	1	151872367	A	T	0.403509	WZS01853-ZF3_153-Cas9	control_CRISPR	somatic	intergenic_region	MODIFIER	CBLN2-ENSSSCG00000044321	ENSSSCG00000020859-ENSSSCG00000044321	snv
	13	149544926	C	T	0.449541	WZS01853-ZF3_153-Cas9	control_CRISPR	somatic	intergenic_region	MODIFIER	ENSSSCG00000049678-ENSSSCG00000048592	ENSSSCG00000049678-ENSSSCG00000048592	snv
	2	144833353	T	C	0.48227	WZS01853-ZF3_153-Cas9	control_CRISPR	somatic	intron_variant	MODIFIER	NR3C1	ENSSSCG00000014401	snv
	2	108672404	A	G	0.571429	WZS01853-ZF3_153-Cas9	control_CRISPR	somatic	intron_variant	MODIFIER	PPIP5K2	ENSSSCG00000024999	snv
	3	47239055	G	T	0.277778	WZS01853-ZF3_153-Cas9	control_CRISPR	somatic	intron_variant	MODIFIER	SH3RF3	ENSSSCG00000038296	snv
	8	48491384	C	A	0.433628	WZS01853-ZF3_153-Cas9	control_CRISPR	somatic	intergenic_region	MODIFIER	ENSSSCG00000042238-U6	ENSSSCG00000042238-ENSSSCG00000020037	snv
	2	81683697	C	A	0.560976	WZS01853-ZF3_153-Cas9	control_CRISPR	somatic	intron_variant	MODIFIER	THOC3	ENSSSCG00000014061	snv
	7	83536479	T	G	0.548387	WZS01853-ZF3_153-Cas9	control_CRISPR	somatic	intergenic_region	MODIFIER	SNORA70-ENSSSCG00000042413	ENSSSCG00000020581-ENSSSCG00000042413	snv
	9	33123531	G	T	0.538462	WZS01853-ZF3_153-Cas9	control_CRISPR	somatic	intron_variant	MODIFIER	TMEM123	ENSSSCG00000031170	snv
	13	129555919	C	A	0.422414	WZS01853-ZF3_153-Cas9	control_CRISPR	somatic	intron_variant	MODIFIER	FGF12	ENSSSCG00000038584	snv
	8	114769576	A	G	0.314286	WZS01853-ZF3_153-Cas9	control_CRISPR	somatic	intergenic_region	MODIFIER	ENSSSCG00000049369-DKK2	ENSSSCG00000049369-ENSSSCG00000032094	snv
	8	55039404	A	C	0.531532	WZS01853-ZF3_153-Cas9	control_CRISPR	somatic	intergenic_region	MODIFIER	NMU-ENSSSCG00000042303	ENSSSCG00000027954-ENSSSCG00000042303	snv
	4	5595914	T	A	0.378641	WZS01853-ZF3_153-Cas9	control_CRISPR	somatic	intergenic_region	MODIFIER	ENSSSCG00000044937-ENSSSCG00000049175	ENSSSCG00000044937-ENSSSCG00000049175	snv
	6	94544107	C	A	0.448598	WZS01853-ZF3_153-Cas9	control_CRISPR	somatic	intergenic_region	MODIFIER	POU3F1-ENSSSCG00000044365	ENSSSCG00000003646-ENSSSCG00000044365	snv
	7	60956578	C	A	0.526316	WZS01853-ZF3_153-Cas9	control_CRISPR	somatic	downstream_gene_variant	MODIFIER	ENSSSCG00000001928	ENSSSCG00000001928	snv
	6	125589617	C	T	0.504854	WZS01853-ZF3_153-Cas9	control_CRISPR	somatic	intergenic_region	MODIFIER	ENSSSCG00000038382-PIK3C3	ENSSSCG00000038382-ENSSSCG00000003749	snv
	1	6002208	C	A	0.470588	WZS01853-ZF3_153-Cas9	control_CRISPR	somatic	intron_variant	MODIFIER	PRKN	ENSSSCG00000004032	snv
	7	108496718	A	G	0.528926	WZS01853-ZF3_153-Cas9	control_CRISPR	somatic	intergenic_region	MODIFIER	ENSSSCG00000043565-ENSSSCG00000046538	ENSSSCG00000043565-ENSSSCG00000046538	snv
	10	58050641	C	T	0.448276	WZS01853-ZF3_153-Cas9	control_CRISPR	somatic	intron_variant	MODIFIER	CCNY	ENSSSCG00000011107	snv
	9	91489420	G	C	0.412214	WZS01853-ZF3_153-Cas9	control_CRISPR	somatic	intron_variant	MODIFIER	RAPGEF5	ENSSSCG00000015383	snv
	3	131811220	C	A	0.444444	WZS01853-ZF3_153-Cas9	control_CRISPR	somatic	intergenic_region	MODIFIER	ENSSSCG00000046059-ENSSSCG00000045933	ENSSSCG00000046059-ENSSSCG00000045933	snv
	15	87168612	G	A	0.390411	WZS01853-ZF3_153-Cas9	control_CRISPR	somatic	intergenic_region	MODIFIER	CERKL-NEUROD1	ENSSSCG00000016010-ENSSSCG00000016011	snv
	1	221395406	C	A	0.454545	WZS01853-ZF3_153-Cas9	control_CRISPR	somatic	intron_variant	MODIFIER	DOCK8	ENSSSCG00000005240	snv
	9	29805517	A	C	0.496503	WZS01853-ZF3_153-Cas9	control_CRISPR	somatic	intron_variant	MODIFIER	ENSSSCG00000033271	ENSSSCG00000033271	snv
	7	35477203	G	T	0.5	WZS01853-ZF3_153-Cas9	control_CRISPR	somatic	intergenic_region	MODIFIER	ENSSSCG00000042731-ENSSSCG00000044091	ENSSSCG00000042731-ENSSSCG00000044091	snv
	16	11255165	CT	C	0.482456	WZS01853-ZF3_153-Cas9	control_CRISPR	somatic	intergenic_region	MODIFIER	ENSSSCG00000046297-ENSSSCG00000050375	ENSSSCG00000046297-ENSSSCG00000050375	indel
	14	63446996	C	T	0.445652	WZS01853-ZF3_153-Cas9	control_CRISPR	somatic	intron_variant	MODIFIER	ENSSSCG00000010212	ENSSSCG00000010212	snv
	11	64605694	C	A	0.166667	WZS01853-ZF3_153-Cas9	control_CRISPR	somatic	intron_variant	MODIFIER	ENSSSCG00000009497	ENSSSCG00000009497	snv
	9	62855291	T	A	0.505155	WZS01853-ZF3_153-Cas9	control_CRISPR	somatic	intergenic_region	MODIFIER	ENSSSCG00000047682-ENSSSCG00000046596	ENSSSCG00000047682-ENSSSCG00000046596	snv
	7	119030241	C	A	0.514563	WZS01853-ZF3_153-Cas9	control_CRISPR	somatic	intergenic_region	MODIFIER	ENSSSCG00000044157-ENSSSCG00000041330	ENSSSCG00000044157-ENSSSCG00000041330	snv
	16	41955157	C	A	0.506173	WZS01853-ZF3_153-Cas9	control_CRISPR	somatic	intergenic_region	MODIFIER	ENSSSCG00000043802-ENSSSCG00000049006	ENSSSCG00000043802-ENSSSCG00000049006	snv
	5	17652566	G	A	0.5	WZS01853-ZF3_153-Cas9	control_CRISPR	somatic	intergenic_region	MODIFIER	ENSSSCG00000000239-ENSSSCG00000024474	ENSSSCG00000000239-ENSSSCG00000024474	snv
	1	69178243	A	T	0.495575	WZS01853-ZF3_153-Cas9	control_CRISPR	somatic	intergenic_region	MODIFIER	GRIK2-ENSSSCG00000046266	ENSSSCG00000004361-ENSSSCG00000046266	snv
	7	92472682	G	A	0.506757	WZS01853-ZF3_153-Cas9	control_CRISPR	somatic	intergenic_region	MODIFIER	ENSSSCG00000051041-ZFP36L1	ENSSSCG00000051041-ENSSSCG00000028304	snv
	1	62261869	A	AT	0.445783	WZS01853-ZF3_153-Cas9	control_CRISPR	somatic	intergenic_region	MODIFIER	ENSSSCG00000050706-ENSSSCG00000044734	ENSSSCG00000050706-ENSSSCG00000044734	indel
	1	245899588	A	G	0.363636	WZS01853-ZF3_153-Cas9	control_CRISPR	somatic	upstream_gene_variant	MODIFIER	OR13C3	ENSSSCG00000026865	snv
	7	7105692	T	C	0.519685	WZS01853-ZF3_153-Cas9	control_CRISPR	somatic	intergenic_region	MODIFIER	ENSSSCG00000043822-TFAP2A	ENSSSCG00000043822-ENSSSCG00000001036	snv
	5	97059703	C	T	0.520661	WZS01853-ZF3_153-Cas9	control_CRISPR	somatic	intron_variant	MODIFIER	LRRIQ1	ENSSSCG00000000934	snv
	14	12267367	C	T	0.344595	WZS01853-ZF3_153-Cas9	control_CRISPR	somatic	intron_variant	MODIFIER	ZNF395	ENSSSCG00000009676	snv
	18	35169876	C	A	0.46	WZS01853-ZF3_153-Cas9	control_CRISPR	somatic	intergenic_region	MODIFIER	IMMP2L-ENSSSCG00000047859	ENSSSCG00000016650-ENSSSCG00000047859	snv
	6	17624723	C	T	0.350515	WZS01853-ZF3_153-Cas9	control_CRISPR	somatic	intron_variant	MODIFIER	CYB5B	ENSSSCG00000033944	snv
	1	102583648	C	A	0.433962	WZS01853-ZF3_153-Cas9	control_CRISPR	somatic	intron_variant	MODIFIER	DCC	ENSSSCG00000040836	snv
	13	175189170	T	C	0.551724	WZS01853-ZF3_153-Cas9	control_CRISPR	somatic	intergenic_region	MODIFIER	ENSSSCG00000046438-ENSSSCG00000045464	ENSSSCG00000046438-ENSSSCG00000045464	snv
	14	68828725	C	G	0.542857	WZS01853-ZF3_153-Cas9	control_CRISPR	somatic	intergenic_region	MODIFIER	ENSSSCG00000046347-ENSSSCG00000041188	ENSSSCG00000046347-ENSSSCG00000041188	snv
	16	66882126	A	G	0.495726	WZS01853-ZF3_153-Cas9	control_CRISPR	somatic	intron_variant	MODIFIER	SGCD	ENSSSCG00000017063	snv
	9	64545808	G	C	0.441441	WZS01853-ZF3_153-Cas9	control_CRISPR	somatic	intron_variant	MODIFIER	ENSSSCG00000028035	ENSSSCG00000028035	snv
	13	77095809	T	C	0.44086	WZS01853-ZF3_153-Cas9	control_CRISPR	somatic	intron_variant	MODIFIER	PPP2R3A	ENSSSCG00000033185	snv
	1	39401407	G	T	0.492063	WZS01853-ZF3_153-Cas9	control_CRISPR	somatic	intron_variant	MODIFIER	TRDN	ENSSSCG00000027613	snv
	14	121810804	G	T	0.584906	WZS01853-ZF3_153-Cas9	control_CRISPR	somatic	intron_variant	MODIFIER	ENSSSCG00000042781	ENSSSCG00000042781	snv
	13	180095479	A	T	0.491379	WZS01853-ZF3_153-Cas9	control_CRISPR	somatic	intergenic_region	MODIFIER	ENSSSCG00000051785-ENSSSCG00000051574	ENSSSCG00000051785-ENSSSCG00000051574	snv
	15	58142462	T	C	0.558559	WZS01853-ZF3_153-Cas9	control_CRISPR	somatic	intergenic_region	MODIFIER	ENSSSCG00000047295-ENSSSCG00000037219	ENSSSCG00000047295-ENSSSCG00000037219	snv
	6	126653349	G	T	0.552632	WZS01853-ZF3_153-Cas9	control_CRISPR	somatic	intergenic_region	MODIFIER	ENSSSCG00000037233-SYT4	ENSSSCG00000037233-ENSSSCG00000037079	snv
	18	30584028	A	G	0.59322	WZS01853-ZF3_153-Cas9	control_CRISPR	somatic	intron_variant	MODIFIER	ENSSSCG00000047179	ENSSSCG00000047179	snv
	16	4025854	C	G	0.29	WZS01853-ZF3_153-Cas9	control_CRISPR	somatic	intergenic_region	MODIFIER	OTULINL-ENSSSCG00000043314	ENSSSCG00000016782-ENSSSCG00000043314	snv
	6	56572761	C	A	0.442623	WZS01853-ZF3_153-Cas9	control_CRISPR	somatic	upstream_gene_variant	MODIFIER	DPRX	ENSSSCG00000046881	snv
	8	7505369	A	G	0.410853	WZS01853-ZF3_153-Cas9	control_CRISPR	somatic	intron_variant	MODIFIER	ENSSSCG00000051157	ENSSSCG00000051157	snv
	4	28186338	G	C	0.2	WZS01853-ZF3_153-Cas9	control_CRISPR	somatic	downstream_gene_variant	MODIFIER	ENY2	ENSSSCG00000038444	snv
	4	1712987	C	T	0.407895	WZS01853-ZF3_153-Cas9	control_CRISPR	somatic	intron_variant	MODIFIER	ENSSSCG00000036022	ENSSSCG00000036022	snv
	13	164761956	C	T	0.538462	WZS01853-ZF3_153-Cas9	control_CRISPR	somatic	intergenic_region	MODIFIER	U6-ENSSSCG00000045741	ENSSSCG00000026634-ENSSSCG00000045741	snv
	1	46006224	A	C	0.3125	WZS01853-ZF3_153-Cas9	control_CRISPR	somatic	intergenic_region	MODIFIER	PHF3-ENSSSCG00000049526	ENSSSCG00000035259-ENSSSCG00000049526	snv
	12	55669652	GC	G	0.449275	WZS01853-ZF3_153-Cas9	control_CRISPR	somatic	intergenic_region	MODIFIER	ENSSSCG00000044652-ENSSSCG00000043908	ENSSSCG00000044652-ENSSSCG00000043908	indel
	1	258992990	G	T	0.473282	WZS01853-ZF3_153-Cas9	control_CRISPR	somatic	intergenic_region	MODIFIER	ENSSSCG00000051604-ENSSSCG00000051728	ENSSSCG00000051604-ENSSSCG00000051728	snv
	5	75385281	G	T	0.448598	WZS01853-ZF3_153-Cas9	control_CRISPR	somatic	intron_variant	MODIFIER	TMEM117	ENSSSCG00000000801	snv
	11	31882178	G	T	0.514563	WZS01853-ZF3_153-Cas9	control_CRISPR	somatic	intergenic_region	MODIFIER	ENSSSCG00000047665-ENSSSCG00000046780	ENSSSCG00000047665-ENSSSCG00000046780	snv
	14	116518816	A	T	0.597938	WZS01853-ZF3_153-Cas9	control_CRISPR	somatic	intergenic_region	MODIFIER	U8-U6	ENSSSCG00000018956-ENSSSCG00000020604	snv
	1	48389972	G	T	0.576471	WZS01853-ZF3_153-Cas9	control_CRISPR	somatic	intergenic_region	MODIFIER	ENSSSCG00000050497-ENSSSCG00000047735	ENSSSCG00000050497-ENSSSCG00000047735	snv
	3	67098148	G	T	0.409524	WZS01853-ZF3_153-Cas9	control_CRISPR	somatic	intron_variant	MODIFIER	ENSSSCG00000050709	ENSSSCG00000050709	snv
	13	77413368	G	T	0.21831	WZS01853-ZF3_153-Cas9	control_CRISPR	somatic	intron_variant	MODIFIER	STAG1	ENSSSCG00000011652	snv
	15	19576039	G	A	0.482456	WZS01853-ZF3_153-Cas9	control_CRISPR	somatic	intron_variant	MODIFIER	GPR39	ENSSSCG00000015707	snv
	4	74142133	C	A	0.59596	WZS01853-ZF3_153-Cas9	control_CRISPR	somatic	intergenic_region	MODIFIER	TOX-ENSSSCG00000049613	ENSSSCG00000006235-ENSSSCG00000049613	snv
	11	57569362	A	C	0.488722	WZS01853-ZF3_153-Cas9	control_CRISPR	somatic	intergenic_region	MODIFIER	ENSSSCG00000033995-ENSSSCG00000046381	ENSSSCG00000033995-ENSSSCG00000046381	snv
	1	263375114	T	G	0.371069	WZS01853-ZF3_153-Cas9	control_CRISPR	somatic	3_prime_UTR_variant	MODIFIER	ENSSSCG00000045558	ENSSSCG00000045558	snv
	13	13110713	G	T	0.464912	WZS01853-ZF3_153-Cas9	control_CRISPR	somatic	intergenic_region	MODIFIER	ENSSSCG00000045332-ENSSSCG00000041418	ENSSSCG00000045332-ENSSSCG00000041418	snv
	6	133188053	T	C	0.431818	WZS01853-ZF3_153-Cas9	control_CRISPR	somatic	intergenic_region	MODIFIER	U1-ENSSSCG00000027421	ENSSSCG00000050555-ENSSSCG00000027421	snv
	10	4557513	C	A	0.5	WZS01853-ZF3_153-Cas9	control_CRISPR	somatic	intergenic_region	MODIFIER	Y_RNA-ENSSSCG00000045101	ENSSSCG00000018504-ENSSSCG00000045101	snv
	13	138486812	G	T	0.426829	WZS01853-ZF3_153-Cas9	control_CRISPR	somatic	intron_variant	MODIFIER	CD86	ENSSSCG00000011877	snv
	9	59419181	C	T	0.535354	WZS01853-ZF3_153-Cas9	control_CRISPR	somatic	intron_variant	MODIFIER	OPCML	ENSSSCG00000037534	snv
	16	10972996	G	GA	0.411765	WZS01853-ZF3_153-Cas9	control_CRISPR	somatic	non_coding_transcript_exon_variant	MODIFIER	ENSSSCG00000046297	ENSSSCG00000046297	indel
	11	54492811	T	C	0.564885	WZS01853-ZF3_153-Cas9	control_CRISPR	somatic	intergenic_region	MODIFIER	ENSSSCG00000004054-ENSSSCG00000047723	ENSSSCG00000004054-ENSSSCG00000047723	snv
	13	129794451	C	T	0.555556	WZS01853-ZF3_153-Cas9	control_CRISPR	somatic	intron_variant	MODIFIER	FGF12	ENSSSCG00000038584	snv
	7	25372090	TC	T	0.494382	WZS01853-ZF3_153-Cas9	control_CRISPR	somatic	intron_variant	MODIFIER	BMP5	ENSSSCG00000001478	indel
	13	179508687	T	C	0.515152	WZS01853-ZF3_153-Cas9	control_CRISPR	somatic	intron_variant	MODIFIER	SAMSN1	ENSSSCG00000038062	snv
	6	30801749	C	T	0.522388	WZS01853-ZF3_153-Cas9	control_CRISPR	somatic	intergenic_region	MODIFIER	ENSSSCG00000047270-ENSSSCG00000041426	ENSSSCG00000047270-ENSSSCG00000041426	snv
	1	235317414	G	A	0.495238	WZS01853-ZF3_153-Cas9	control_CRISPR	somatic	intron_variant	MODIFIER	ENSSSCG00000049366	ENSSSCG00000049366	snv
	2	145865951	T	G	0.528846	WZS01853-ZF3_153-Cas9	control_CRISPR	somatic	intron_variant	MODIFIER	KCTD16	ENSSSCG00000032826	snv
	1	105384798	C	T	0.439252	WZS01853-ZF3_153-Cas9	control_CRISPR	somatic	intergenic_region	MODIFIER	ENSSSCG00000051116-TXNL1	ENSSSCG00000051116-ENSSSCG00000004537	snv
	13	87369864	T	C	0.404959	WZS01853-ZF3_153-Cas9	control_CRISPR	somatic	intergenic_region	MODIFIER	ENSSSCG00000047889-ENSSSCG00000042542	ENSSSCG00000047889-ENSSSCG00000042542	snv
	6	60560218	C	A	0.490566	WZS01853-ZF3_153-Cas9	control_CRISPR	somatic	intron_variant	MODIFIER	EDDM13	ENSSSCG00000049238	snv
	9	6617887	C	A	0.463415	WZS01853-ZF3_153-Cas9	control_CRISPR	somatic	intron_variant	MODIFIER	NUMA1	ENSSSCG00000014802	snv
	1	49422545	C	T	0.512821	WZS01853-ZF3_153-Cas9	control_CRISPR	somatic	intron_variant	MODIFIER	ADGRB3	ENSSSCG00000004270	snv
	1	187239839	G	T	0.452381	WZS01853-ZF3_153-Cas9	control_CRISPR	somatic	intron_variant	MODIFIER	ARMH4	ENSSSCG00000005071	snv
	17	49192452	C	A	0.184615	WZS01853-ZF3_153-Cas9	control_CRISPR	somatic	intron_variant	MODIFIER	EYA2	ENSSSCG00000007453	snv
	16	2110225	A	C	0.581395	WZS01853-ZF3_153-Cas9	control_CRISPR	somatic	intergenic_region	MODIFIER	ENSSSCG00000050328-ENSSSCG00000046966	ENSSSCG00000050328-ENSSSCG00000046966	snv
	13	9622964	G	A	0.467742	WZS01853-ZF3_153-Cas9	control_CRISPR	somatic	intergenic_region	MODIFIER	U6-ENSSSCG00000046232	ENSSSCG00000039231-ENSSSCG00000046232	snv
	6	126615223	G	T	0.461538	WZS01853-ZF3_153-Cas9	control_CRISPR	somatic	intergenic_region	MODIFIER	ENSSSCG00000037233-SYT4	ENSSSCG00000037233-ENSSSCG00000037079	snv
	1	27335462	G	A	0.505747	WZS01853-ZF3_153-Cas9	control_CRISPR	somatic	upstream_gene_variant	MODIFIER	U6	ENSSSCG00000020379	snv
	9	83905771	G	T	0.216495	WZS01853-ZF3_153-Cas9	control_CRISPR	somatic	intron_variant	MODIFIER	DGKB	ENSSSCG00000015355	snv
	18	47748853	A	G	0.29661	WZS01853-ZF3_153-Cas9	control_CRISPR	somatic	intergenic_region	MODIFIER	MPP6-ENSSSCG00000038124	ENSSSCG00000016717-ENSSSCG00000038124	snv
	7	113234247	C	A	0.564815	WZS01853-ZF3_153-Cas9	control_CRISPR	somatic	intron_variant	MODIFIER	CATSPERB	ENSSSCG00000002442	snv
	16	55028367	G	A	0.53	WZS01853-ZF3_153-Cas9	control_CRISPR	somatic	intron_variant	MODIFIER	SLIT3	ENSSSCG00000017012	snv
	3	97376884	C	T	0.577778	WZS01853-ZF3_153-Cas9	control_CRISPR	somatic	downstream_gene_variant	MODIFIER	ENSSSCG00000051523	ENSSSCG00000051523	snv
	5	66413350	C	T	0.548673	WZS01853-ZF3_153-Cas9	control_CRISPR	somatic	intron_variant	MODIFIER	ENSSSCG00000042195	ENSSSCG00000042195	snv
	15	31800687	G	T	0.243902	WZS01853-ZF3_153-Cas9	control_CRISPR	somatic	intron_variant	MODIFIER	ENSSSCG00000044523	ENSSSCG00000044523	snv
	8	110652951	A	G	0.266667	WZS01853-ZF3_153-Cas9	control_CRISPR	somatic	intergenic_region	MODIFIER	AP1AR-ENSSSCG00000048810	ENSSSCG00000009128-ENSSSCG00000048810	snv
	7	119381488	T	C	0.533333	WZS01853-ZF3_153-Cas9	control_CRISPR	somatic	intron_variant	MODIFIER	ENSSSCG00000042556	ENSSSCG00000042556	snv
	3	107208979	C	A	0.416667	WZS01853-ZF3_153-Cas9	control_CRISPR	somatic	downstream_gene_variant	MODIFIER	ENSSSCG00000048847	ENSSSCG00000048847	snv
	6	168067023	G	T	0.64486	WZS01853-ZF3_153-Cas9	control_CRISPR	somatic	missense_variant	MODERATE	FAM183A	ENSSSCG00000003954	snv
	6	123183678	C	G	0.432203	WZS01853-ZF3_153-Cas9	control_CRISPR	somatic	intergenic_region	MODIFIER	ENSSSCG00000045450-ENSSSCG00000049226	ENSSSCG00000045450-ENSSSCG00000049226	snv
	3	119557076	A	T	0.518987	WZS01853-ZF3_153-Cas9	control_CRISPR	somatic	intergenic_region	MODIFIER	RDH14-KCNS3	ENSSSCG00000008608-ENSSSCG00000031905	snv
	13	206242070	C	A	0.428571	WZS01853-ZF3_153-Cas9	control_CRISPR	somatic	downstream_gene_variant	MODIFIER	ENSSSCG00000033653	ENSSSCG00000033653	snv
	5	41089241	A	T	0.54321	WZS01853-ZF3_153-Cas9	control_CRISPR	somatic	intergenic_region	MODIFIER	SYT10-ENSSSCG00000045848	ENSSSCG00000000527-ENSSSCG00000045848	snv
	16	53584177	C	A	0.322581	WZS01853-ZF3_153-Cas9	control_CRISPR	somatic	intron_variant	MODIFIER	KCNIP1	ENSSSCG00000017003	snv
	15	44103018	C	A	0.444444	WZS01853-ZF3_153-Cas9	control_CRISPR	somatic	intron_variant	MODIFIER	TENM3	ENSSSCG00000015774	snv
	14	105994024	G	C	0.401639	WZS01853-ZF3_153-Cas9	control_CRISPR	somatic	intergenic_region	MODIFIER	HELLS-CYP2C42	ENSSSCG00000010486-ENSSSCG00000035347	snv
	6	160374399	C	T	0.522523	WZS01853-ZF3_153-Cas9	control_CRISPR	somatic	intron_variant	MODIFIER	NRDC	ENSSSCG00000003870	snv
	4	79828602	T	C	0.449438	WZS01853-ZF3_153-Cas9	control_CRISPR	somatic	intron_variant	MODIFIER	PRKDC	ENSSSCG00000006274	snv
	2	22602785	T	G	0.48	WZS01853-ZF3_153-Cas9	control_CRISPR	somatic	intergenic_region	MODIFIER	ENSSSCG00000050877-ENSSSCG00000045070	ENSSSCG00000050877-ENSSSCG00000045070	snv
	1	84589503	C	A	0.495238	WZS01853-ZF3_153-Cas9	control_CRISPR	somatic	intergenic_region	MODIFIER	TENT5A-ENSSSCG00000046570	ENSSSCG00000004464-ENSSSCG00000046570	snv
	5	78906153	C	T	0.355769	WZS01853-ZF3_153-Cas9	control_CRISPR	somatic	intergenic_region	MODIFIER	ENSSSCG00000048376-C12orf54	ENSSSCG00000048376-ENSSSCG00000050678	snv
	5	78429347	G	A	0.181818	WZS01853-ZF3_153-Cas9	control_CRISPR	somatic	intron_variant	MODIFIER	SENP1	ENSSSCG00000000816	snv
	6	137208288	C	A	0.445312	WZS01853-ZF3_153-Cas9	control_CRISPR	somatic	intergenic_region	MODIFIER	ST6GALNAC3-U6	ENSSSCG00000024494-ENSSSCG00000024120	snv
	1	81896811	G	T	0.468254	WZS01853-ZF3_153-Cas9	control_CRISPR	somatic	upstream_gene_variant	MODIFIER	ENSSSCG00000047800	ENSSSCG00000047800	snv
	1	118328453	A	T	0.324138	WZS01853-ZF3_153-Cas9	control_CRISPR	somatic	intergenic_region	MODIFIER	ENSSSCG00000045826-ENSSSCG00000041333	ENSSSCG00000045826-ENSSSCG00000041333	snv
	2	146570060	T	G	0.525	WZS01853-ZF3_153-Cas9	control_CRISPR	somatic	intron_variant	MODIFIER	ENSSSCG00000039356	ENSSSCG00000039356	snv
	4	1449589	C	A	0.216216	WZS01853-ZF3_153-Cas9	control_CRISPR	somatic	upstream_gene_variant	MODIFIER	LYNX1	ENSSSCG00000031724	snv
	14	3815323	A	G	0.530435	WZS01853-ZF3_153-Cas9	control_CRISPR	somatic	intergenic_region	MODIFIER	ENSSSCG00000047639-ENSSSCG00000049681	ENSSSCG00000047639-ENSSSCG00000049681	snv
	16	70325056	G	T	0.569106	WZS01853-ZF3_153-Cas9	control_CRISPR	somatic	intergenic_region	MODIFIER	ENSSSCG00000019555-U6	ENSSSCG00000019555-ENSSSCG00000035184	snv
	15	64463819	A	G	0.417391	WZS01853-ZF3_153-Cas9	control_CRISPR	somatic	intron_variant	MODIFIER	ACVR1C	ENSSSCG00000015873	snv
	3	22303889	G	C	0.526316	WZS01853-ZF3_153-Cas9	control_CRISPR	somatic	intron_variant	MODIFIER	PRKCB	ENSSSCG00000033674	snv
	13	143121516	C	T	0.479675	WZS01853-ZF3_153-Cas9	control_CRISPR	somatic	intergenic_region	MODIFIER	ENSSSCG00000045587-ENSSSCG00000044243	ENSSSCG00000045587-ENSSSCG00000044243	snv
	7	118872733	G	A	0.508929	WZS01853-ZF3_153-Cas9	control_CRISPR	somatic	non_coding_transcript_exon_variant	MODIFIER	ENSSSCG00000044157	ENSSSCG00000044157	snv
	15	12231682	A	C	0.485294	WZS01853-ZF3_153-Cas9	control_CRISPR	somatic	intergenic_region	MODIFIER	ENSSSCG00000047966-ENSSSCG00000047486	ENSSSCG00000047966-ENSSSCG00000047486	snv
	11	41914837	T	A	0.537634	WZS01853-ZF3_153-Cas9	control_CRISPR	somatic	intergenic_region	MODIFIER	ENSSSCG00000041007-KLHL1	ENSSSCG00000041007-ENSSSCG00000009456	snv
	4	122879247	G	A	0.421053	WZS01853-ZF3_153-Cas9	control_CRISPR	somatic	intron_variant	MODIFIER	ABCD3	ENSSSCG00000028620	snv
	13	168425619	G	T	0.495935	WZS01853-ZF3_153-Cas9	control_CRISPR	somatic	intergenic_region	MODIFIER	ENSSSCG00000044900-POU1F1	ENSSSCG00000044900-ENSSSCG00000011996	snv
	11	42942375	C	T	0.189781	WZS01853-ZF3_153-Cas9	control_CRISPR	somatic	intron_variant	MODIFIER	ENSSSCG00000048820	ENSSSCG00000048820	snv
	1	86093937	C	T	0.465116	WZS01853-ZF3_153-Cas9	control_CRISPR	somatic	intron_variant	MODIFIER	TTK	ENSSSCG00000004466	snv
	10	37321576	C	CA	0.443299	WZS01853-ZF3_153-Cas9	control_CRISPR	somatic	upstream_gene_variant	MODIFIER	ENSSSCG00000042210	ENSSSCG00000042210	indel
	13	102718747	C	A	0.468254	WZS01853-ZF3_153-Cas9	control_CRISPR	somatic	intergenic_region	MODIFIER	ENSSSCG00000045945-ENSSSCG00000020451	ENSSSCG00000045945-ENSSSCG00000020451	snv
	8	84930754	C	T	0.549618	WZS01853-ZF3_153-Cas9	control_CRISPR	somatic	intron_variant	MODIFIER	INPP4B	ENSSSCG00000009050	snv
	8	85829724	G	A	0.514286	WZS01853-ZF3_153-Cas9	control_CRISPR	somatic	intergenic_region	MODIFIER	IL15-ENSSSCG00000041153	ENSSSCG00000009051-ENSSSCG00000041153	snv
	4	49614916	TA	T	0.525	WZS01853-ZF3_153-Cas9	control_CRISPR	somatic	intron_variant	MODIFIER	CNBD1	ENSSSCG00000036161	indel
	14	138617881	G	T	0.637681	WZS01853-ZF3_153-Cas9	control_CRISPR	somatic	intron_variant	MODIFIER	MGMT	ENSSSCG00000010756	snv
	4	5025128	A	G	0.444444	WZS01853-ZF3_153-Cas9	control_CRISPR	somatic	downstream_gene_variant	MODIFIER	ENSSSCG00000033680	ENSSSCG00000033680	snv
	16	78142612	G	A	0.55	WZS01853-ZF3_153-Cas9	control_CRISPR	somatic	intergenic_region	MODIFIER	ENSSSCG00000045456-ENSSSCG00000038028	ENSSSCG00000045456-ENSSSCG00000038028	snv
	1	244780350	T	A	0.604938	WZS01853-ZF3_153-Cas9	control_CRISPR	somatic	intergenic_region	MODIFIER	ENSSSCG00000005401-ENSSSCG00000051755	ENSSSCG00000005401-ENSSSCG00000051755	snv
	1	79962741	C	A	0.584906	WZS01853-ZF3_153-Cas9	control_CRISPR	somatic	intron_variant	MODIFIER	HS3ST5	ENSSSCG00000004433	snv
	16	3352835	C	T	0.156863	WZS01853-ZF3_153-Cas9	control_CRISPR	somatic	intron_variant	MODIFIER	DNAH5	ENSSSCG00000032827	snv
	1	51653755	G	T	0.56044	WZS01853-ZF3_153-Cas9	control_CRISPR	somatic	intergenic_region	MODIFIER	SNORA70-ENSSSCG00000046159	ENSSSCG00000020544-ENSSSCG00000046159	snv
	14	134279770	G	T	0.440476	WZS01853-ZF3_153-Cas9	control_CRISPR	somatic	intron_variant	MODIFIER	ZRANB1	ENSSSCG00000010738	snv
	1	232785357	A	T	0.462963	WZS01853-ZF3_153-Cas9	control_CRISPR	somatic	intergenic_region	MODIFIER	ENSSSCG00000043441-ENSSSCG00000041249	ENSSSCG00000043441-ENSSSCG00000041249	snv
	14	7242495	A	G	0.296	WZS01853-ZF3_153-Cas9	control_CRISPR	somatic	non_coding_transcript_exon_variant	MODIFIER	ENSSSCG00000009638	ENSSSCG00000009638	snv
	16	76656619	T	G	0.409091	WZS01853-ZF3_153-Cas9	control_CRISPR	somatic	intergenic_region	MODIFIER	ENSSSCG00000041139-U6	ENSSSCG00000041139-ENSSSCG00000029851	snv
	3	122997046	A	G	0.523438	WZS01853-ZF3_153-Cas9	control_CRISPR	somatic	intergenic_region	MODIFIER	ENSSSCG00000048577-ENSSSCG00000042932	ENSSSCG00000048577-ENSSSCG00000042932	snv
	4	128772386	G	T	0.472727	WZS01853-ZF3_153-Cas9	control_CRISPR	somatic	intergenic_region	MODIFIER	ENSSSCG00000046583-ENSSSCG00000042877	ENSSSCG00000046583-ENSSSCG00000042877	snv
	13	530451	A	AT	0.344828	WZS01853-ZF3_153-Cas9	control_CRISPR	somatic	intron_variant	MODIFIER	CPNE4	ENSSSCG00000011178	indel
	11	8953958	A	G	0.177419	WZS01853-ZF3_153-Cas9	control_CRISPR	somatic	intron_variant	MODIFIER	ENSSSCG00000009341	ENSSSCG00000009341	snv
	13	194384662	A	G	0.472222	WZS01853-ZF3_153-Cas9	control_CRISPR	somatic	intergenic_region	MODIFIER	ENSSSCG00000048455-ENSSSCG00000039409	ENSSSCG00000048455-ENSSSCG00000039409	snv
	1	258300552	T	C	0.454545	WZS01853-ZF3_153-Cas9	control_CRISPR	somatic	intergenic_region	MODIFIER	TLR4-U6	ENSSSCG00000005503-ENSSSCG00000040848	snv
	14	128861130	A	T	0.485149	WZS01853-ZF3_153-Cas9	control_CRISPR	somatic	intron_variant	MODIFIER	ENSSSCG00000050286	ENSSSCG00000050286	snv
	16	17262067	C	G	0.47	WZS01853-ZF3_153-Cas9	control_CRISPR	somatic	intergenic_region	MODIFIER	ENSSSCG00000044848-ENSSSCG00000045747	ENSSSCG00000044848-ENSSSCG00000045747	snv
	14	43711878	T	C	0.586538	WZS01853-ZF3_153-Cas9	control_CRISPR	somatic	non_coding_transcript_exon_variant	MODIFIER	ENSSSCG00000047670	ENSSSCG00000047670	snv
	11	26173565	T	A	0.556818	WZS01853-ZF3_153-Cas9	control_CRISPR	somatic	intergenic_region	MODIFIER	PCDH8-OLFM4	ENSSSCG00000009445-ENSSSCG00000009444	snv
	1	131663619	T	C	0.544554	WZS01853-ZF3_153-Cas9	control_CRISPR	somatic	intron_variant	MODIFIER	FSIP1	ENSSSCG00000040418	snv
	1	192912973	T	C	0.452991	WZS01853-ZF3_153-Cas9	control_CRISPR	somatic	intergenic_region	MODIFIER	ENSSSCG00000045893-ENSSSCG00000036551	ENSSSCG00000045893-ENSSSCG00000036551	snv
	16	64926149	T	C	0.457944	WZS01853-ZF3_153-Cas9	control_CRISPR	somatic	upstream_gene_variant	MODIFIER	ENSSSCG00000045441	ENSSSCG00000045441	snv
	1	43910440	C	G	0.47619	WZS01853-ZF3_153-Cas9	control_CRISPR	somatic	intergenic_region	MODIFIER	SLC35F1-ENSSSCG00000042072	ENSSSCG00000004250-ENSSSCG00000042072	snv
	17	30880926	C	T	0.492754	WZS01853-ZF3_153-Cas9	control_CRISPR	somatic	intergenic_region	MODIFIER	VSX1-ENTPD6	ENSSSCG00000023887-ENSSSCG00000027070	snv
	5	66563242	C	T	0.495868	WZS01853-ZF3_153-Cas9	control_CRISPR	somatic	intron_variant	MODIFIER	CRACR2A	ENSSSCG00000000732	snv
	10	3404788	C	A	0.43	WZS01853-ZF3_153-Cas9	control_CRISPR	somatic	intergenic_region	MODIFIER	BRINP3-ENSSSCG00000035395	ENSSSCG00000010809-ENSSSCG00000035395	snv
	10	1597227	G	A	0.178082	WZS01853-ZF3_153-Cas9	control_CRISPR	somatic	intron_variant	MODIFIER	ENSSSCG00000045591	ENSSSCG00000045591	snv
	16	53654506	C	A	0.472222	WZS01853-ZF3_153-Cas9	control_CRISPR	somatic	upstream_gene_variant	MODIFIER	KCNIP1	ENSSSCG00000017003	snv
	2	86903524	T	G	0.46729	WZS01853-ZF3_153-Cas9	control_CRISPR	somatic	intron_variant	MODIFIER	AP3B1	ENSSSCG00000014101	snv
	1	6178494	G	T	0.48	WZS01853-ZF3_153-Cas9	control_CRISPR	somatic	intron_variant	MODIFIER	PRKN	ENSSSCG00000004032	snv
	1	188760076	T	C	0.467742	WZS01853-ZF3_153-Cas9	control_CRISPR	somatic	intron_variant	MODIFIER	RTN1	ENSSSCG00000025013	snv
	9	13992136	A	C	0.524194	WZS01853-ZF3_153-Cas9	control_CRISPR	somatic	intergenic_region	MODIFIER	ENSSSCG00000042291-ENSSSCG00000051456	ENSSSCG00000042291-ENSSSCG00000051456	snv
	13	6268088	T	G	0.523438	WZS01853-ZF3_153-Cas9	control_CRISPR	somatic	intron_variant	MODIFIER	KCNH8	ENSSSCG00000011204	snv
	15	62950867	G	T	0.576923	WZS01853-ZF3_153-Cas9	control_CRISPR	somatic	intergenic_region	MODIFIER	ENSSSCG00000048898-U6	ENSSSCG00000048898-ENSSSCG00000034643	snv
	6	97919285	G	C	0.321429	WZS01853-ZF3_153-Cas9	control_CRISPR	somatic	missense_variant	MODERATE	PIEZO2	ENSSSCG00000034765	snv
	1	63627563	T	G	0.577778	WZS01853-ZF3_153-Cas9	control_CRISPR	somatic	intron_variant	MODIFIER	ENSSSCG00000042849	ENSSSCG00000042849	snv
	6	78595051	G	T	0.520661	WZS01853-ZF3_153-Cas9	control_CRISPR	somatic	intron_variant	MODIFIER	ENSSSCG00000003503	ENSSSCG00000003503	snv
	4	74604676	G	A	0.519231	WZS01853-ZF3_153-Cas9	control_CRISPR	somatic	intergenic_region	MODIFIER	ENSSSCG00000041775-FAM110B	ENSSSCG00000041775-ENSSSCG00000006240	snv
	7	16843692	C	A	0.471264	WZS01853-ZF3_153-Cas9	control_CRISPR	somatic	upstream_gene_variant	MODIFIER	ENSSSCG00000043011	ENSSSCG00000043011	snv
	1	198211669	A	T	0.486301	WZS01853-ZF3_153-Cas9	control_CRISPR	somatic	intergenic_region	MODIFIER	TUSC1-IZUMO3	ENSSSCG00000005128-ENSSSCG00000005129	snv
	3	57638489	GT	G	0.630952	WZS01853-ZF3_153-Cas9	control_CRISPR	somatic	intergenic_region	MODIFIER	FOXI3-THNSL2	ENSSSCG00000036354-ENSSSCG00000025106	indel
	3	73680653	C	A	0.470588	WZS01853-ZF3_153-Cas9	control_CRISPR	somatic	intergenic_region	MODIFIER	ARHGAP25-PROKR1	ENSSSCG00000008344-ENSSSCG00000038148	snv
	4	5499489	T	C	0.518519	WZS01853-ZF3_153-Cas9	control_CRISPR	somatic	intergenic_region	MODIFIER	ENSSSCG00000044937-ENSSSCG00000049175	ENSSSCG00000044937-ENSSSCG00000049175	snv
	6	112916192	G	A	0.483333	WZS01853-ZF3_153-Cas9	control_CRISPR	somatic	intergenic_region	MODIFIER	ENSSSCG00000051156-U6	ENSSSCG00000051156-ENSSSCG00000019533	snv
	6	116526826	T	C	0.569444	WZS01853-ZF3_153-Cas9	control_CRISPR	somatic	intron_variant	MODIFIER	KLHL14	ENSSSCG00000003733	snv
	6	115305274	T	G	0.475248	WZS01853-ZF3_153-Cas9	control_CRISPR	somatic	intron_variant	MODIFIER	DSG4	ENSSSCG00000020740	snv
	1	172209318	A	C	0.474138	WZS01853-ZF3_153-Cas9	control_CRISPR	somatic	intergenic_region	MODIFIER	LRFN5-ENSSSCG00000041306	ENSSSCG00000004990-ENSSSCG00000041306	snv
	15	134906165	G	GT	0.325301	WZS01853-ZF3_153-Cas9	control_CRISPR	somatic	intergenic_region	MODIFIER	ENSSSCG00000043599-ENSSSCG00000046337	ENSSSCG00000043599-ENSSSCG00000046337	indel
	13	36345073	G	T	0.529412	WZS01853-ZF3_153-Cas9	control_CRISPR	somatic	intron_variant	MODIFIER	CACNA2D3	ENSSSCG00000027019	snv
	11	30124543	C	A	0.516484	WZS01853-ZF3_153-Cas9	control_CRISPR	somatic	intergenic_region	MODIFIER	ENSSSCG00000035135-PCDH17	ENSSSCG00000035135-ENSSSCG00000009446	snv
	7	106964156	G	A	0.380531	WZS01853-ZF3_153-Cas9	control_CRISPR	somatic	intergenic_region	MODIFIER	ENSSSCG00000044398-ENSSSCG00000042895	ENSSSCG00000044398-ENSSSCG00000042895	snv
	1	161024055	C	G	0.269841	WZS01853-ZF3_153-Cas9	control_CRISPR	somatic	intergenic_region	MODIFIER	ENSSSCG00000036234-ENSSSCG00000047145	ENSSSCG00000036234-ENSSSCG00000047145	snv
	6	23812897	G	C	0.386555	WZS01853-ZF3_153-Cas9	control_CRISPR	somatic	intergenic_region	MODIFIER	ENSSSCG00000050597-ENSSSCG00000047287	ENSSSCG00000050597-ENSSSCG00000047287	snv
	13	142918245	A	G	0.544554	WZS01853-ZF3_153-Cas9	control_CRISPR	somatic	intergenic_region	MODIFIER	ENSSSCG00000044822-ENSSSCG00000049654	ENSSSCG00000044822-ENSSSCG00000049654	snv
	13	203656397	T	C	0.383178	WZS01853-ZF3_153-Cas9	control_CRISPR	somatic	intron_variant	MODIFIER	DSCAM	ENSSSCG00000012072	snv
	4	43068086	A	C	0.44186	WZS01853-ZF3_153-Cas9	control_CRISPR	somatic	downstream_gene_variant	MODIFIER	ENSSSCG00000043857	ENSSSCG00000043857	snv
	15	82574395	G	T	0.536585	WZS01853-ZF3_153-Cas9	control_CRISPR	somatic	intron_variant	MODIFIER	ENSSSCG00000048724	ENSSSCG00000048724	snv
	18	37724408	C	T	0.516484	WZS01853-ZF3_153-Cas9	control_CRISPR	somatic	upstream_gene_variant	MODIFIER	KIAA0895	ENSSSCG00000016659	snv
	1	69642361	A	G	0.474576	WZS01853-ZF3_153-Cas9	control_CRISPR	somatic	intergenic_region	MODIFIER	GRIK2-ENSSSCG00000046266	ENSSSCG00000004361-ENSSSCG00000046266	snv
	15	25788967	T	A	0.288889	WZS01853-ZF3_153-Cas9	control_CRISPR	somatic	upstream_gene_variant	MODIFIER	ENSSSCG00000047004	ENSSSCG00000047004	snv
	3	132124569	A	T	0.426087	WZS01853-ZF3_153-Cas9	control_CRISPR	somatic	intron_variant	MODIFIER	ENSSSCG00000049737	ENSSSCG00000049737	snv
	9	1374019	C	T	0.455357	WZS01853-ZF3_153-Cas9	control_CRISPR	somatic	intergenic_region	MODIFIER	ENSSSCG00000042620-ENSSSCG00000014587	ENSSSCG00000042620-ENSSSCG00000014587	snv
	16	12251045	A	G	0.505263	WZS01853-ZF3_153-Cas9	control_CRISPR	somatic	intron_variant	MODIFIER	CDH10	ENSSSCG00000016802	snv
	1	36296033	G	T	0.5	WZS01853-ZF3_153-Cas9	control_CRISPR	somatic	intergenic_region	MODIFIER	ENSSSCG00000042355-ENSSSCG00000042137	ENSSSCG00000042355-ENSSSCG00000042137	snv
	3	88734314	A	G	0.4	WZS01853-ZF3_153-Cas9	control_CRISPR	somatic	intergenic_region	MODIFIER	ENSSSCG00000042900-ENSSSCG00000051467	ENSSSCG00000042900-ENSSSCG00000051467	snv
	8	66581980	GA	G	0.520548	WZS01853-ZF3_153-Cas9	control_CRISPR	somatic	intron_variant	MODIFIER	ENSSSCG00000022724	ENSSSCG00000022724	indel
	17	16305323	C	G	0.484848	WZS01853-ZF3_153-Cas9	control_CRISPR	somatic	intergenic_region	MODIFIER	ENSSSCG00000044030-HAO1	ENSSSCG00000044030-ENSSSCG00000027439	snv
	1	101812737	G	T	0.403509	WZS01853-ZF3_153-Cas9	control_CRISPR	somatic	intron_variant	MODIFIER	ENSSSCG00000051201	ENSSSCG00000051201	snv
	16	25888601	T	TA	0.45122	WZS01853-ZF3_153-Cas9	control_CRISPR	somatic	intron_variant	MODIFIER	C7	ENSSSCG00000016859	indel
	13	57154495	A	G	0.52459	WZS01853-ZF3_153-Cas9	control_CRISPR	somatic	intergenic_region	MODIFIER	CHL1-CNTN6	ENSSSCG00000011524-ENSSSCG00000038152	snv
	14	90157455	G	A	0.539823	WZS01853-ZF3_153-Cas9	control_CRISPR	somatic	intron_variant	MODIFIER	CHAT	ENSSSCG00000010392	snv
	10	21551948	C	A	0.428571	WZS01853-ZF3_153-Cas9	control_CRISPR	somatic	intron_variant	MODIFIER	PTPRC	ENSSSCG00000010908	snv
	1	157632363	A	C	0.410853	WZS01853-ZF3_153-Cas9	control_CRISPR	somatic	intergenic_region	MODIFIER	ENSSSCG00000047724-SERPINB8	ENSSSCG00000047724-ENSSSCG00000004888	snv
	4	66532343	A	C	0.613861	WZS01853-ZF3_153-Cas9	control_CRISPR	somatic	intron_variant	MODIFIER	C8orf34	ENSSSCG00000035887	snv
	13	58237832	T	C	0.514563	WZS01853-ZF3_153-Cas9	control_CRISPR	somatic	intergenic_region	MODIFIER	CNTN6-ENSSSCG00000048689	ENSSSCG00000038152-ENSSSCG00000048689	snv
	4	54355210	T	A	0.523256	WZS01853-ZF3_153-Cas9	control_CRISPR	somatic	intergenic_region	MODIFIER	ENSSSCG00000045469-ENSSSCG00000042001	ENSSSCG00000045469-ENSSSCG00000042001	snv
	2	43717421	T	A	0.185185	WZS01853-ZF3_153-Cas9	control_CRISPR	somatic	intergenic_region	MODIFIER	ENSSSCG00000043915-INSC	ENSSSCG00000043915-ENSSSCG00000013385	snv
	3	126739597	G	C	0.31746	WZS01853-ZF3_153-Cas9	control_CRISPR	somatic	synonymous_variant	LOW	YWHAQ	ENSSSCG00000008638	snv
	13	156573615	G	T	0.472222	WZS01853-ZF3_153-Cas9	control_CRISPR	somatic	intergenic_region	MODIFIER	ENSSSCG00000044816-ZPLD1	ENSSSCG00000044816-ENSSSCG00000011947	snv
	2	19431975	A	G	0.384615	WZS01853-ZF3_153-Cas9	control_CRISPR	somatic	intergenic_region	MODIFIER	API5-ENSSSCG00000043369	ENSSSCG00000013285-ENSSSCG00000043369	snv
	9	37465243	C	A	0.444444	WZS01853-ZF3_153-Cas9	control_CRISPR	somatic	intergenic_region	MODIFIER	ENSSSCG00000015011-ENSSSCG00000045002	ENSSSCG00000015011-ENSSSCG00000045002	snv
	1	135554545	A	G	0.387387	WZS01853-ZF3_153-Cas9	control_CRISPR	somatic	intergenic_region	MODIFIER	ENSSSCG00000048307-DPH6	ENSSSCG00000048307-ENSSSCG00000035254	snv
	7	30105658	C	T	0.426966	WZS01853-ZF3_153-Cas9	control_CRISPR	somatic	intergenic_region	MODIFIER	ENSSSCG00000047035-GRM4	ENSSSCG00000047035-ENSSSCG00000001523	snv
	14	12256870	G	A	0.298851	WZS01853-ZF3_153-Cas9	control_CRISPR	somatic	stop_gained	HIGH	ZNF395	ENSSSCG00000009676	snv
	8	93828671	A	AT	0.448276	WZS01853-ZF3_153-Cas9	control_CRISPR	somatic	intergenic_region	MODIFIER	ENSSSCG00000042175-ENSSSCG00000049834	ENSSSCG00000042175-ENSSSCG00000049834	indel
	13	194384656	TC	T	0.519608	WZS01853-ZF3_153-Cas9	control_CRISPR	somatic	intergenic_region	MODIFIER	ENSSSCG00000048455-ENSSSCG00000039409	ENSSSCG00000048455-ENSSSCG00000039409	indel
	10	52454318	TA	T	0.415254	WZS01853-ZF3_153-Cas9	control_CRISPR	somatic	intergenic_region	MODIFIER	PIP4K2A-ENSSSCG00000048036	ENSSSCG00000011079-ENSSSCG00000048036	indel
	1	2083974	G	T	0.560606	WZS01853-ZF3_153-Cas9	control_CRISPR	somatic	downstream_gene_variant	MODIFIER	FGFR1OP	ENSSSCG00000004023	snv
	7	92898937	G	A	0.568627	WZS01853-ZF3_153-Cas9	control_CRISPR	somatic	missense_variant	MODERATE	EXD2	ENSSSCG00000002305	snv
	4	113047250	A	ATG	0.153846	WZS01853-ZF3_153-Cas9	control_CRISPR	somatic	intergenic_region	MODIFIER	ENSSSCG00000045057-U6	ENSSSCG00000045057-ENSSSCG00000018415	indel
	6	138990280	G	T	0.477477	WZS01853-ZF3_153-Cas9	control_CRISPR	somatic	intron_variant	MODIFIER	LRRIQ3	ENSSSCG00000003784	snv
	6	57615168	G	T	0.543478	WZS01853-ZF3_153-Cas9	control_CRISPR	somatic	intron_variant	MODIFIER	ENSSSCG00000037023	ENSSSCG00000037023	snv
	18	34381661	T	C	0.505882	WZS01853-ZF3_153-Cas9	control_CRISPR	somatic	intron_variant	MODIFIER	IMMP2L	ENSSSCG00000016650	snv
	11	35626276	C	T	0.409836	WZS01853-ZF3_153-Cas9	control_CRISPR	somatic	intergenic_region	MODIFIER	ENSSSCG00000051718-U6	ENSSSCG00000051718-ENSSSCG00000018929	snv
	10	60154346	A	G	0.440367	WZS01853-ZF3_153-Cas9	control_CRISPR	somatic	intergenic_region	MODIFIER	ECHDC3-USP6NL	ENSSSCG00000011119-ENSSSCG00000011120	snv
	13	8925877	C	T	0.49635	WZS01853-ZF3_153-Cas9	control_CRISPR	somatic	intergenic_region	MODIFIER	ENSSSCG00000048516-ENSSSCG00000042050	ENSSSCG00000048516-ENSSSCG00000042050	snv
	1	13798856	G	T	0.381356	WZS01853-ZF3_153-Cas9	control_CRISPR	somatic	upstream_gene_variant	MODIFIER	ENSSSCG00000004081	ENSSSCG00000004081	snv
	9	98909116	G	A	0.397436	WZS01853-ZF3_153-Cas9	control_CRISPR	somatic	intergenic_region	MODIFIER	ENSSSCG00000051110-SEMA3C	ENSSSCG00000051110-ENSSSCG00000023784	snv
	1	192149186	AT	A	0.245455	WZS01853-ZF3_153-Cas9	control_CRISPR	somatic	intergenic_region	MODIFIER	ENSSSCG00000044241-ENSSSCG00000050818	ENSSSCG00000044241-ENSSSCG00000050818	indel
	13	1078539	C	A	0.432432	WZS01853-ZF3_153-Cas9	control_CRISPR	somatic	intergenic_region	MODIFIER	ENSSSCG00000034665-NUDT16	ENSSSCG00000034665-ENSSSCG00000032424	snv
	14	89933653	G	T	0.552381	WZS01853-ZF3_153-Cas9	control_CRISPR	somatic	intergenic_region	MODIFIER	ENSSSCG00000043851-DRGX	ENSSSCG00000043851-ENSSSCG00000037404	snv
	6	90275429	C	A	0.478261	WZS01853-ZF3_153-Cas9	control_CRISPR	somatic	intron_variant	MODIFIER	ENSSSCG00000049113	ENSSSCG00000049113	snv
	13	76149243	C	T	0.441558	WZS01853-ZF3_153-Cas9	control_CRISPR	somatic	intron_variant	MODIFIER	EPHB1	ENSSSCG00000024492	snv
	15	48709636	C	G	0.509434	WZS01853-ZF3_153-Cas9	control_CRISPR	somatic	intergenic_region	MODIFIER	ZNF703-ENSSSCG00000040467	ENSSSCG00000015828-ENSSSCG00000040467	snv
	11	9914412	G	A	0.54955	WZS01853-ZF3_153-Cas9	control_CRISPR	somatic	upstream_gene_variant	MODIFIER	ENSSSCG00000046743	ENSSSCG00000046743	snv
	15	126884565	C	A	0.439655	WZS01853-ZF3_153-Cas9	control_CRISPR	somatic	intergenic_region	MODIFIER	ENSSSCG00000043239-NYAP2	ENSSSCG00000043239-ENSSSCG00000016239	snv
	1	169735013	G	GA	0.552941	WZS01853-ZF3_153-Cas9	control_CRISPR	somatic	downstream_gene_variant	MODIFIER	PNN	ENSSSCG00000022828	indel
	6	60465417	G	A	0.586207	WZS01853-ZF3_153-Cas9	control_CRISPR	somatic	missense_variant	MODERATE	ZNF444	ENSSSCG00000035770	snv
	10	5192145	C	A	0.480392	WZS01853-ZF3_153-Cas9	control_CRISPR	somatic	intergenic_region	MODIFIER	U6-ENSSSCG00000049015	ENSSSCG00000036162-ENSSSCG00000049015	snv
	3	65507032	GA	G	0.573913	WZS01853-ZF3_153-Cas9	control_CRISPR	somatic	intergenic_region	MODIFIER	U1-ENSSSCG00000042171	ENSSSCG00000036252-ENSSSCG00000042171	indel
	13	164106546	T	C	0.666667	WZS01853-ZF3_153-Cas9	control_CRISPR	somatic	intergenic_region	MODIFIER	U6-ENSSSCG00000045741	ENSSSCG00000026634-ENSSSCG00000045741	snv
	3	24715141	C	A	0.474227	WZS01853-ZF3_153-Cas9	control_CRISPR	somatic	intergenic_region	MODIFIER	ENSSSCG00000007848-ENSSSCG00000032961	ENSSSCG00000007848-ENSSSCG00000032961	snv
	2	107721740	G	A	0.346939	WZS01853-ZF3_153-Cas9	control_CRISPR	somatic	intergenic_region	MODIFIER	ENSSSCG00000046316-ENSSSCG00000033364	ENSSSCG00000046316-ENSSSCG00000033364	snv
	15	81504088	G	A	0.568627	WZS01853-ZF3_153-Cas9	control_CRISPR	somatic	upstream_gene_variant	MODIFIER	ENSSSCG00000048395	ENSSSCG00000048395	snv
	12	56960318	C	T	0.477941	WZS01853-ZF3_153-Cas9	control_CRISPR	somatic	intron_variant	MODIFIER	MYOCD	ENSSSCG00000031988	snv
	18	30967249	C	T	0.545455	WZS01853-ZF3_153-Cas9	control_CRISPR	somatic	intergenic_region	MODIFIER	U1-MDFIC	ENSSSCG00000020195-ENSSSCG00000021885	snv
	9	75166341	CT	C	0.555556	WZS01853-ZF3_153-Cas9	control_CRISPR	somatic	intron_variant	MODIFIER	ASB4	ENSSSCG00000015333	indel
	13	63269503	A	C	0.545455	WZS01853-ZF3_153-Cas9	control_CRISPR	somatic	intergenic_region	MODIFIER	ENSSSCG00000042277-GRM7	ENSSSCG00000042277-ENSSSCG00000023891	snv
	8	64707591	A	G	0.480916	WZS01853-ZF3_153-Cas9	control_CRISPR	somatic	intergenic_region	MODIFIER	ENSSSCG00000049899-ENSSSCG00000041381	ENSSSCG00000049899-ENSSSCG00000041381	snv
	17	12492524	C	T	0.486239	WZS01853-ZF3_153-Cas9	control_CRISPR	somatic	intron_variant	MODIFIER	ENSSSCG00000035371	ENSSSCG00000035371	snv
	1	150864642	T	C	0.489362	WZS01853-ZF3_153-Cas9	control_CRISPR	somatic	intergenic_region	MODIFIER	NETO1-U6	ENSSSCG00000027654-ENSSSCG00000031071	snv
	1	93094562	C	T	0.415493	WZS01853-ZF3_153-Cas9	control_CRISPR	somatic	intergenic_region	MODIFIER	ENSSSCG00000035076-ENSSSCG00000031966	ENSSSCG00000035076-ENSSSCG00000031966	snv
	1	250634651	C	A	0.532468	WZS01853-ZF3_153-Cas9	control_CRISPR	somatic	intergenic_region	MODIFIER	PTPN3-PALM2AKAP2	ENSSSCG00000005449-ENSSSCG00000033120	snv
	5	84028687	C	A	0.571429	WZS01853-ZF3_153-Cas9	control_CRISPR	somatic	intron_variant	MODIFIER	UHRF1BP1L	ENSSSCG00000026697	snv
	8	69253285	T	C	0.448276	WZS01853-ZF3_153-Cas9	control_CRISPR	somatic	intergenic_region	MODIFIER	ADAMTS3-ENSSSCG00000042491	ENSSSCG00000038180-ENSSSCG00000042491	snv
	8	52931734	A	C	0.494845	WZS01853-ZF3_153-Cas9	control_CRISPR	somatic	downstream_gene_variant	MODIFIER	ENSSSCG00000044328	ENSSSCG00000044328	snv
	1	233746167	G	C	0.513514	WZS01853-ZF3_153-Cas9	control_CRISPR	somatic	intergenic_region	MODIFIER	ENSSSCG00000044537-ENSSSCG00000048153	ENSSSCG00000044537-ENSSSCG00000048153	snv
	1	67681770	T	C	0.439394	WZS01853-ZF3_153-Cas9	control_CRISPR	somatic	intron_variant	MODIFIER	ENSSSCG00000049859	ENSSSCG00000049859	snv
	2	6060228	C	A	0.493671	WZS01853-ZF3_153-Cas9	control_CRISPR	somatic	downstream_gene_variant	MODIFIER	ENSSSCG00000012950	ENSSSCG00000012950	snv
	5	4458041	T	A	0.481132	WZS01853-ZF3_153-Cas9	control_CRISPR	somatic	intergenic_region	MODIFIER	ENSSSCG00000000021-PRR5	ENSSSCG00000000021-ENSSSCG00000021748	snv
	7	82330845	C	A	0.495238	WZS01853-ZF3_153-Cas9	control_CRISPR	somatic	intergenic_region	MODIFIER	ENSSSCG00000048658-ENSSSCG00000051077	ENSSSCG00000048658-ENSSSCG00000051077	snv
	11	34595041	C	A	0.5	WZS01853-ZF3_153-Cas9	control_CRISPR	somatic	intergenic_region	MODIFIER	ENSSSCG00000034523-ENSSSCG00000043875	ENSSSCG00000034523-ENSSSCG00000043875	snv
	3	22518129	C	A	0.5	WZS01853-ZF3_153-Cas9	control_CRISPR	somatic	intron_variant	MODIFIER	ENSSSCG00000040637	ENSSSCG00000040637	snv
	13	24813118	C	G	0.496296	WZS01853-ZF3_153-Cas9	control_CRISPR	somatic	intergenic_region	MODIFIER	ZNF621-CTNNB1	ENSSSCG00000026550-ENSSSCG00000011274	snv
	1	197092914	C	A	0.45045	WZS01853-ZF3_153-Cas9	control_CRISPR	somatic	intergenic_region	MODIFIER	U6-TUSC1	ENSSSCG00000037763-ENSSSCG00000005128	snv
	13	105883277	T	C	0.546512	WZS01853-ZF3_153-Cas9	control_CRISPR	somatic	intergenic_region	MODIFIER	ENSSSCG00000033350-ZBBX	ENSSSCG00000033350-ENSSSCG00000023393	snv
	1	63406327	C	A	0.521739	WZS01853-ZF3_153-Cas9	control_CRISPR	somatic	intergenic_region	MODIFIER	ENSSSCG00000047501-ENSSSCG00000042849	ENSSSCG00000047501-ENSSSCG00000042849	snv
	8	86388276	G	A	0.427807	WZS01853-ZF3_153-Cas9	control_CRISPR	somatic	upstream_gene_variant	MODIFIER	ENSSSCG00000050817	ENSSSCG00000050817	snv
	8	102677672	A	T	0.608392	WZS01853-ZF3_153-Cas9	control_CRISPR	somatic	intergenic_region	MODIFIER	ANXA5-QRFPR	ENSSSCG00000009097-ENSSSCG00000009098	snv
	8	92160681	G	T	0.520548	WZS01853-ZF3_153-Cas9	control_CRISPR	somatic	intergenic_region	MODIFIER	ENSSSCG00000050034-PABPC4L	ENSSSCG00000050034-ENSSSCG00000009067	snv
	3	65581245	C	A	0.45	WZS01853-ZF3_153-Cas9	control_CRISPR	somatic	intergenic_region	MODIFIER	U1-ENSSSCG00000042171	ENSSSCG00000036252-ENSSSCG00000042171	snv
	11	56473144	T	G	0.359551	WZS01853-ZF3_153-Cas9	control_CRISPR	somatic	intergenic_region	MODIFIER	ENSSSCG00000042996-SLITRK6	ENSSSCG00000042996-ENSSSCG00000009486	snv
	14	4234046	C	T	0.446602	WZS01853-ZF3_153-Cas9	control_CRISPR	somatic	intergenic_region	MODIFIER	LPL-SLC18A1	ENSSSCG00000040631-ENSSSCG00000009601	snv
	14	65062617	G	T	0.449541	WZS01853-ZF3_153-Cas9	control_CRISPR	somatic	intergenic_region	MODIFIER	TMEM26-CABCOCO1	ENSSSCG00000023525-ENSSSCG00000033268	snv
	9	109115194	G	T	0.46281	WZS01853-ZF3_153-Cas9	control_CRISPR	somatic	intergenic_region	MODIFIER	ENSSSCG00000046573-ZNF398	ENSSSCG00000046573-ENSSSCG00000030294	snv
	15	22914800	C	A	0.543103	WZS01853-ZF3_153-Cas9	control_CRISPR	somatic	intergenic_region	MODIFIER	ENSSSCG00000046908-ENSSSCG00000015712	ENSSSCG00000046908-ENSSSCG00000015712	snv
	18	26769553	A	G	0.482456	WZS01853-ZF3_153-Cas9	control_CRISPR	somatic	intergenic_region	MODIFIER	U2-ENSSSCG00000048136	ENSSSCG00000045662-ENSSSCG00000048136	snv
	13	48602939	G	A	0.564356	WZS01853-ZF3_153-Cas9	control_CRISPR	somatic	intron_variant	MODIFIER	SUCLG2	ENSSSCG00000011501	snv
	8	86871912	A	G	0.463158	WZS01853-ZF3_153-Cas9	control_CRISPR	somatic	intron_variant	MODIFIER	ENSSSCG00000048695	ENSSSCG00000048695	snv
	8	50260869	C	A	0.484848	WZS01853-ZF3_153-Cas9	control_CRISPR	somatic	downstream_gene_variant	MODIFIER	FSTL5	ENSSSCG00000027183	snv
	18	13258073	C	A	0.535211	WZS01853-ZF3_153-Cas9	control_CRISPR	somatic	intergenic_region	MODIFIER	ENSSSCG00000048386-MTPN	ENSSSCG00000048386-ENSSSCG00000039290	snv
	1	81757305	C	G	0.55814	WZS01853-ZF3_153-Cas9	control_CRISPR	somatic	intron_variant	MODIFIER	NT5DC1	ENSSSCG00000004435	snv
	6	133018644	C	A	0.496063	WZS01853-ZF3_153-Cas9	control_CRISPR	somatic	intergenic_region	MODIFIER	U1-ENSSSCG00000027421	ENSSSCG00000050555-ENSSSCG00000027421	snv
	8	27492195	T	G	0.413223	WZS01853-ZF3_153-Cas9	control_CRISPR	somatic	intergenic_region	MODIFIER	ENSSSCG00000050356-ARAP2	ENSSSCG00000050356-ENSSSCG00000008768	snv
	16	16815375	T	A	0.563025	WZS01853-ZF3_153-Cas9	control_CRISPR	somatic	intergenic_region	MODIFIER	ENSSSCG00000043218-ENSSSCG00000048639	ENSSSCG00000043218-ENSSSCG00000048639	snv
	1	158666728	A	T	0.440678	WZS01853-ZF3_153-Cas9	control_CRISPR	somatic	intron_variant	MODIFIER	PHLPP1	ENSSSCG00000004896	snv
	1	140284115	G	T	0.531915	WZS01853-ZF3_153-Cas9	control_CRISPR	somatic	intron_variant	MODIFIER	GABRG3	ENSSSCG00000035584	snv
	5	86642955	A	C	0.5	WZS01853-ZF3_153-Cas9	control_CRISPR	somatic	intergenic_region	MODIFIER	ENSSSCG00000050424-NEDD1	ENSSSCG00000050424-ENSSSCG00000000890	snv
	9	68336260	T	G	0.265432	WZS01853-ZF3_153-Cas9	control_CRISPR	somatic	intron_variant	MODIFIER	ADAM22	ENSSSCG00000015297	snv
	13	172078710	A	AT	0.398305	WZS01853-ZF3_153-Cas9	control_CRISPR	somatic	intergenic_region	MODIFIER	ENSSSCG00000050907-ENSSSCG00000029127	ENSSSCG00000050907-ENSSSCG00000029127	indel
	8	97385373	G	T	0.514851	WZS01853-ZF3_153-Cas9	control_CRISPR	somatic	intergenic_region	MODIFIER	ENSSSCG00000051677-ENSSSCG00000046257	ENSSSCG00000051677-ENSSSCG00000046257	snv
	10	62353571	C	A	0.525547	WZS01853-ZF3_153-Cas9	control_CRISPR	somatic	intron_variant	MODIFIER	ENSSSCG00000043083	ENSSSCG00000043083	snv
	6	66531930	C	T	0.462366	WZS01853-ZF3_153-Cas9	control_CRISPR	somatic	intergenic_region	MODIFIER	AJAP1-NPHP4	ENSSSCG00000031344-ENSSSCG00000029843	snv
	15	85348957	T	C	0.515152	WZS01853-ZF3_153-Cas9	control_CRISPR	somatic	upstream_gene_variant	MODIFIER	ZNF385B	ENSSSCG00000023181	snv
	14	27189038	A	G	0.458716	WZS01853-ZF3_153-Cas9	control_CRISPR	somatic	intergenic_region	MODIFIER	ENSSSCG00000045739-ENSSSCG00000042937	ENSSSCG00000045739-ENSSSCG00000042937	snv
	7	109604217	A	G	0.48	WZS01853-ZF3_153-Cas9	control_CRISPR	somatic	intergenic_region	MODIFIER	ENSSSCG00000047700-ENSSSCG00000037928	ENSSSCG00000047700-ENSSSCG00000037928	snv
	1	123125496	G	A	0.495238	WZS01853-ZF3_153-Cas9	control_CRISPR	somatic	intron_variant	MODIFIER	FBN1	ENSSSCG00000004658	snv
	10	22757556	C	A	0.447368	WZS01853-ZF3_153-Cas9	control_CRISPR	somatic	intron_variant	MODIFIER	NR5A2	ENSSSCG00000024975	snv
	15	68283557	T	TA	0.375	WZS01853-ZF3_153-Cas9	control_CRISPR	somatic	intron_variant	MODIFIER	SLC4A10	ENSSSCG00000015893	indel
	8	37062952	T	A	0.258065	WZS01853-ZF3_153-Cas9	control_CRISPR	somatic	intron_variant	MODIFIER	GABRB1	ENSSSCG00000035621	snv
	3	62733756	C	T	0.476923	WZS01853-ZF3_153-Cas9	control_CRISPR	somatic	intergenic_region	MODIFIER	U6-U6	ENSSSCG00000035540-ENSSSCG00000024141	snv
	14	53326634	G	A	0.545455	WZS01853-ZF3_153-Cas9	control_CRISPR	somatic	intergenic_region	MODIFIER	ENSSSCG00000046944-ENSSSCG00000051722	ENSSSCG00000046944-ENSSSCG00000051722	snv
	5	95920984	G	A	0.57265	WZS01853-ZF3_153-Cas9	control_CRISPR	somatic	non_coding_transcript_exon_variant	MODIFIER	ENSSSCG00000051236	ENSSSCG00000051236	snv
	4	113992825	A	C	0.559633	WZS01853-ZF3_153-Cas9	control_CRISPR	somatic	intergenic_region	MODIFIER	ENSSSCG00000041856-ENSSSCG00000035697	ENSSSCG00000041856-ENSSSCG00000035697	snv
	9	89419307	A	G	0.606838	WZS01853-ZF3_153-Cas9	control_CRISPR	somatic	intron_variant	MODIFIER	ITGB8	ENSSSCG00000015375	snv
	1	46554265	G	A	0.470588	WZS01853-ZF3_153-Cas9	control_CRISPR	somatic	intron_variant	MODIFIER	ENSSSCG00000004269	ENSSSCG00000004269	snv
	1	171212344	G	T	0.52	WZS01853-ZF3_153-Cas9	control_CRISPR	somatic	intron_variant	MODIFIER	ENSSSCG00000044677	ENSSSCG00000044677	snv
	17	5739078	G	T	0.655738	WZS01853-ZF3_153-Cas9	control_CRISPR	somatic	intron_variant	MODIFIER	ASAH1	ENSSSCG00000006995	snv
	8	106054900	A	G	0.471698	WZS01853-ZF3_153-Cas9	control_CRISPR	somatic	intergenic_region	MODIFIER	ENSSSCG00000043526-ENSSSCG00000036158	ENSSSCG00000043526-ENSSSCG00000036158	snv
	1	150901137	T	C	0.410256	WZS01853-ZF3_153-Cas9	control_CRISPR	somatic	intergenic_region	MODIFIER	NETO1-U6	ENSSSCG00000027654-ENSSSCG00000031071	snv
	6	124843016	G	GT	0.514019	WZS01853-ZF3_153-Cas9	control_CRISPR	somatic	intergenic_region	MODIFIER	ENSSSCG00000047699-ENSSSCG00000042285	ENSSSCG00000047699-ENSSSCG00000042285	indel
	2	19412676	T	G	0.576577	WZS01853-ZF3_153-Cas9	control_CRISPR	somatic	intergenic_region	MODIFIER	API5-ENSSSCG00000043369	ENSSSCG00000013285-ENSSSCG00000043369	snv
	16	11565047	G	T	0.274725	WZS01853-ZF3_153-Cas9	control_CRISPR	somatic	intergenic_region	MODIFIER	ENSSSCG00000050375-CDH10	ENSSSCG00000050375-ENSSSCG00000016802	snv
	15	9195306	AT	A	0.473118	WZS01853-ZF3_153-Cas9	control_CRISPR	somatic	intergenic_region	MODIFIER	ENSSSCG00000050181-ENSSSCG00000047684	ENSSSCG00000050181-ENSSSCG00000047684	indel
	10	38130089	A	G	0.560345	WZS01853-ZF3_153-Cas9	control_CRISPR	somatic	intergenic_region	MODIFIER	ENSSSCG00000048234-ENSSSCG00000032101	ENSSSCG00000048234-ENSSSCG00000032101	snv
	15	4749278	T	G	0.5	WZS01853-ZF3_153-Cas9	control_CRISPR	somatic	intergenic_region	MODIFIER	ACVR2A-ENSSSCG00000037285	ENSSSCG00000015669-ENSSSCG00000037285	snv
	15	12232626	G	A	0.442623	WZS01853-ZF3_153-Cas9	control_CRISPR	somatic	intergenic_region	MODIFIER	ENSSSCG00000047966-ENSSSCG00000047486	ENSSSCG00000047966-ENSSSCG00000047486	snv
	12	69876	CG	C	0.452174	WZS01853-ZF3_153-Cas9	control_CRISPR	somatic	intergenic_region	MODIFIER	CHR_START-ENSSSCG00000034696	CHR_START-ENSSSCG00000034696	indel
	1	70087211	C	T	0.468531	WZS01853-ZF3_153-Cas9	control_CRISPR	somatic	intergenic_region	MODIFIER	ENSSSCG00000047827-ENSSSCG00000041890	ENSSSCG00000047827-ENSSSCG00000041890	snv
	5	48765448	A	G	0.621359	WZS01853-ZF3_153-Cas9	control_CRISPR	somatic	intron_variant	MODIFIER	ENSSSCG00000000563	ENSSSCG00000000563	snv
	2	53621196	C	A	0.49	WZS01853-ZF3_153-Cas9	control_CRISPR	somatic	intergenic_region	MODIFIER	ENSSSCG00000047332-ENSSSCG00000050941	ENSSSCG00000047332-ENSSSCG00000050941	snv
	17	16509229	C	A	0.386555	WZS01853-ZF3_153-Cas9	control_CRISPR	somatic	intergenic_region	MODIFIER	ENSSSCG00000044030-HAO1	ENSSSCG00000044030-ENSSSCG00000027439	snv
	1	35627821	G	T	0.561983	WZS01853-ZF3_153-Cas9	control_CRISPR	somatic	downstream_gene_variant	MODIFIER	ENSSSCG00000004213	ENSSSCG00000004213	snv
	18	47539536	G	T	0.307692	WZS01853-ZF3_153-Cas9	control_CRISPR	somatic	intron_variant	MODIFIER	GSDME	ENSSSCG00000016716	snv
	13	136180771	C	A	0.525	WZS01853-ZF3_153-Cas9	control_CRISPR	somatic	intergenic_region	MODIFIER	ENSSSCG00000021656-ENSSSCG00000048298	ENSSSCG00000021656-ENSSSCG00000048298	snv
	13	105384680	G	T	0.507937	WZS01853-ZF3_153-Cas9	control_CRISPR	somatic	intergenic_region	MODIFIER	ENSSSCG00000033350-ZBBX	ENSSSCG00000033350-ENSSSCG00000023393	snv
	16	13291875	T	C	0.479167	WZS01853-ZF3_153-Cas9	control_CRISPR	somatic	intergenic_region	MODIFIER	ENSSSCG00000045389-ENSSSCG00000042931	ENSSSCG00000045389-ENSSSCG00000042931	snv
	4	124241268	G	T	0.383838	WZS01853-ZF3_153-Cas9	control_CRISPR	somatic	intron_variant	MODIFIER	DIPK1A	ENSSSCG00000006900	snv
	5	42574703	C	G	0.511628	WZS01853-ZF3_153-Cas9	control_CRISPR	somatic	intron_variant	MODIFIER	ENSSSCG00000033766	ENSSSCG00000033766	snv
	17	26131435	C	A	0.528926	WZS01853-ZF3_153-Cas9	control_CRISPR	somatic	intron_variant	MODIFIER	BANF2	ENSSSCG00000007087	snv
	6	108624142	A	G	0.452381	WZS01853-ZF3_153-Cas9	control_CRISPR	somatic	intron_variant	MODIFIER	LAMA3	ENSSSCG00000003709	snv
	9	110428193	A	G	0.347458	WZS01853-ZF3_153-Cas9	control_CRISPR	somatic	intergenic_region	MODIFIER	ENSSSCG00000034739-ENSSSCG00000015460	ENSSSCG00000034739-ENSSSCG00000015460	snv
	7	76879405	C	T	0.491525	WZS01853-ZF3_153-Cas9	control_CRISPR	somatic	missense_variant	MODERATE	ENSSSCG00000042643	ENSSSCG00000042643	snv
	5	85838577	A	C	0.416058	WZS01853-ZF3_153-Cas9	control_CRISPR	somatic	intergenic_region	MODIFIER	ENSSSCG00000045656-ENSSSCG00000047567	ENSSSCG00000045656-ENSSSCG00000047567	snv
	8	103935917	A	T	0.266667	WZS01853-ZF3_153-Cas9	control_CRISPR	somatic	synonymous_variant	LOW	MAD2L1	ENSSSCG00000036256	snv
	13	156980618	A	G	0.508065	WZS01853-ZF3_153-Cas9	control_CRISPR	somatic	intergenic_region	MODIFIER	ENSSSCG00000020298-U4	ENSSSCG00000020298-ENSSSCG00000023694	snv
	1	262949015	G	T	0.266234	WZS01853-ZF3_153-Cas9	control_CRISPR	somatic	upstream_gene_variant	MODIFIER	ENSSSCG00000026287	ENSSSCG00000026287	snv
	8	66392246	T	A	0.473118	WZS01853-ZF3_153-Cas9	control_CRISPR	somatic	intergenic_region	MODIFIER	ENSSSCG00000037521-ENSSSCG00000031919	ENSSSCG00000037521-ENSSSCG00000031919	snv
	14	2295114	G	T	0.452229	WZS01853-ZF3_153-Cas9	control_CRISPR	somatic	intergenic_region	MODIFIER	ENSSSCG00000043243-AUH	ENSSSCG00000043243-ENSSSCG00000009591	snv
	13	103091615	G	T	0.559633	WZS01853-ZF3_153-Cas9	control_CRISPR	somatic	intergenic_region	MODIFIER	ENSSSCG00000045945-ENSSSCG00000020451	ENSSSCG00000045945-ENSSSCG00000020451	snv
	11	43540573	A	T	0.486239	WZS01853-ZF3_153-Cas9	control_CRISPR	somatic	intergenic_region	MODIFIER	ENSSSCG00000050657-DACH1	ENSSSCG00000050657-ENSSSCG00000009457	snv
	8	93278807	A	C	0.417323	WZS01853-ZF3_153-Cas9	control_CRISPR	somatic	intergenic_region	MODIFIER	ENSSSCG00000042175-ENSSSCG00000049834	ENSSSCG00000042175-ENSSSCG00000049834	snv
	8	90536983	G	T	0.470588	WZS01853-ZF3_153-Cas9	control_CRISPR	somatic	intergenic_region	MODIFIER	ENSSSCG00000043227-ENSSSCG00000051283	ENSSSCG00000043227-ENSSSCG00000051283	snv
	6	34293093	C	T	0.52809	WZS01853-ZF3_153-Cas9	control_CRISPR	somatic	intron_variant	MODIFIER	NKD1	ENSSSCG00000039875	snv
	15	65862566	C	A	0.617021	WZS01853-ZF3_153-Cas9	control_CRISPR	somatic	upstream_gene_variant	MODIFIER	ENSSSCG00000046097	ENSSSCG00000046097	snv
	1	231836743	C	T	0.446809	WZS01853-ZF3_153-Cas9	control_CRISPR	somatic	intergenic_region	MODIFIER	PSAT1-ENSSSCG00000041713	ENSSSCG00000005287-ENSSSCG00000041713	snv
	1	25186904	TA	T	0.561798	WZS01853-ZF3_153-Cas9	control_CRISPR	somatic	intergenic_region	MODIFIER	CITED2-TXLNB	ENSSSCG00000004142-ENSSSCG00000004143	indel
	1	243004535	C	G	0.4875	WZS01853-ZF3_153-Cas9	control_CRISPR	somatic	intron_variant	MODIFIER	ENSSSCG00000042524	ENSSSCG00000042524	snv
	1	210393632	T	C	0.598639	WZS01853-ZF3_153-Cas9	control_CRISPR	somatic	intergenic_region	MODIFIER	ENSSSCG00000048974-ENSSSCG00000047464	ENSSSCG00000048974-ENSSSCG00000047464	snv
	8	34148601	A	G	0.48951	WZS01853-ZF3_153-Cas9	control_CRISPR	somatic	intergenic_region	MODIFIER	ENSSSCG00000037522-KCTD8	ENSSSCG00000037522-ENSSSCG00000035712	snv
	11	41687632	GT	G	0.460674	WZS01853-ZF3_153-Cas9	control_CRISPR	somatic	intergenic_region	MODIFIER	ENSSSCG00000051740-ENSSSCG00000048008	ENSSSCG00000051740-ENSSSCG00000048008	indel
	9	39492810	C	T	0.478261	WZS01853-ZF3_153-Cas9	control_CRISPR	somatic	3_prime_UTR_variant	MODIFIER	PPP2R1B	ENSSSCG00000029538	snv
	12	53875276	C	A	0.514286	WZS01853-ZF3_153-Cas9	control_CRISPR	somatic	intron_variant	MODIFIER	CCDC42	ENSSSCG00000017988	snv
	1	63300242	G	T	0.494949	WZS01853-ZF3_153-Cas9	control_CRISPR	somatic	intergenic_region	MODIFIER	MANEA-ENSSSCG00000049406	ENSSSCG00000035648-ENSSSCG00000049406	snv
	8	61391599	C	A	0.469136	WZS01853-ZF3_153-Cas9	control_CRISPR	somatic	intergenic_region	MODIFIER	ENSSSCG00000031193-ENSSSCG00000047276	ENSSSCG00000031193-ENSSSCG00000047276	snv
	8	33933975	C	A	0.311111	WZS01853-ZF3_153-Cas9	control_CRISPR	somatic	intron_variant	MODIFIER	GRXCR1	ENSSSCG00000008804	snv
	1	177130389	C	A	0.53	WZS01853-ZF3_153-Cas9	control_CRISPR	somatic	intron_variant	MODIFIER	MDGA2	ENSSSCG00000005002	snv
	15	127143229	C	A	0.557377	WZS01853-ZF3_153-Cas9	control_CRISPR	somatic	intron_variant	MODIFIER	NYAP2	ENSSSCG00000016239	snv
	4	73427469	T	C	0.494253	WZS01853-ZF3_153-Cas9	control_CRISPR	somatic	intergenic_region	MODIFIER	ENSSSCG00000043492-ENSSSCG00000045055	ENSSSCG00000043492-ENSSSCG00000045055	snv
	11	74654185	G	T	0.550459	WZS01853-ZF3_153-Cas9	control_CRISPR	somatic	intron_variant	MODIFIER	ENSSSCG00000048878	ENSSSCG00000048878	snv
	7	100800358	A	ATG	0.406593	WZS01853-ZF3_153-Cas9	control_CRISPR	somatic	intron_variant	MODIFIER	ADCK1	ENSSSCG00000002408	indel
	13	17863417	G	T	0.433628	WZS01853-ZF3_153-Cas9	control_CRISPR	somatic	intron_variant	MODIFIER	OSBPL10	ENSSSCG00000011230	snv
	15	40353267	C	A	0.428571	WZS01853-ZF3_153-Cas9	control_CRISPR	somatic	intergenic_region	MODIFIER	ENSSSCG00000049401-ENSSSCG00000045939	ENSSSCG00000049401-ENSSSCG00000045939	snv
	13	134750827	C	A	0.513514	WZS01853-ZF3_153-Cas9	control_CRISPR	somatic	intron_variant	MODIFIER	OSBPL11	ENSSSCG00000026753	snv
	13	27477172	C	T	0.539216	WZS01853-ZF3_153-Cas9	control_CRISPR	somatic	intergenic_region	MODIFIER	ssc-mir-138-TOPAZ1	ENSSSCG00000019971-ENSSSCG00000029268	snv
	5	96213064	C	A	0.569231	WZS01853-ZF3_153-Cas9	control_CRISPR	somatic	intergenic_region	MODIFIER	MGAT4C-NTS	ENSSSCG00000032321-ENSSSCG00000000932	snv
	2	111446082	T	C	0.23301	WZS01853-ZF3_153-Cas9	control_CRISPR	somatic	intergenic_region	MODIFIER	ENSSSCG00000051043-ENSSSCG00000046482	ENSSSCG00000051043-ENSSSCG00000046482	snv
	17	27008299	A	T	0.455446	WZS01853-ZF3_153-Cas9	control_CRISPR	somatic	intergenic_region	MODIFIER	SCP2D1-ENSSSCG00000043679	ENSSSCG00000007099-ENSSSCG00000043679	snv
	12	29317808	G	T	0.469027	WZS01853-ZF3_153-Cas9	control_CRISPR	somatic	intergenic_region	MODIFIER	ENSSSCG00000047265-KIF2B	ENSSSCG00000047265-ENSSSCG00000017599	snv
	4	70160882	T	G	0.464286	WZS01853-ZF3_153-Cas9	control_CRISPR	somatic	upstream_gene_variant	MODIFIER	ENSSSCG00000044066	ENSSSCG00000044066	snv
	16	64926177	G	C	0.491935	WZS01853-ZF3_153-Cas9	control_CRISPR	somatic	upstream_gene_variant	MODIFIER	ENSSSCG00000045441	ENSSSCG00000045441	snv
	5	86642801	T	TA	0.513761	WZS01853-ZF3_153-Cas9	control_CRISPR	somatic	intergenic_region	MODIFIER	ENSSSCG00000050424-NEDD1	ENSSSCG00000050424-ENSSSCG00000000890	indel
	17	6985838	T	C	0.53125	WZS01853-ZF3_153-Cas9	control_CRISPR	somatic	intergenic_region	MODIFIER	ENSSSCG00000048723-ENSSSCG00000041095	ENSSSCG00000048723-ENSSSCG00000041095	snv
	8	24736203	A	G	0.558333	WZS01853-ZF3_153-Cas9	control_CRISPR	somatic	intergenic_region	MODIFIER	PCDH7-ENSSSCG00000008767	ENSSSCG00000008765-ENSSSCG00000008767	snv
	9	78806612	T	C	0.46281	WZS01853-ZF3_153-Cas9	control_CRISPR	somatic	intron_variant	MODIFIER	NXPH1	ENSSSCG00000037207	snv
	12	56141788	C	T	0.49505	WZS01853-ZF3_153-Cas9	control_CRISPR	somatic	intron_variant	MODIFIER	DNAH9	ENSSSCG00000018015	snv
	15	58175337	C	A	0.460674	WZS01853-ZF3_153-Cas9	control_CRISPR	somatic	upstream_gene_variant	MODIFIER	ENSSSCG00000037219	ENSSSCG00000037219	snv
	8	60007711	A	G	0.558824	WZS01853-ZF3_153-Cas9	control_CRISPR	somatic	intergenic_region	MODIFIER	ENSSSCG00000046907-ENSSSCG00000048043	ENSSSCG00000046907-ENSSSCG00000048043	snv
	15	19672765	TA	T	0.568182	WZS01853-ZF3_153-Cas9	control_CRISPR	somatic	intron_variant	MODIFIER	GPR39	ENSSSCG00000015707	indel
	6	67816204	C	A	0.581633	WZS01853-ZF3_153-Cas9	control_CRISPR	somatic	intron_variant	MODIFIER	CAMTA1	ENSSSCG00000036772	snv
	7	113479315	C	A	0.461538	WZS01853-ZF3_153-Cas9	control_CRISPR	somatic	intron_variant	MODIFIER	FBLN5	ENSSSCG00000002444	snv
	14	19919960	T	C	0.483871	WZS01853-ZF3_153-Cas9	control_CRISPR	somatic	intron_variant	MODIFIER	MFAP3L	ENSSSCG00000009709	snv
	11	29041303	T	G	0.447368	WZS01853-ZF3_153-Cas9	control_CRISPR	somatic	intergenic_region	MODIFIER	ENSSSCG00000043491-ENSSSCG00000035135	ENSSSCG00000043491-ENSSSCG00000035135	snv
	4	24890624	C	A	0.456693	WZS01853-ZF3_153-Cas9	control_CRISPR	somatic	intron_variant	MODIFIER	CSMD3	ENSSSCG00000031031	snv
	11	35395907	G	T	0.595506	WZS01853-ZF3_153-Cas9	control_CRISPR	somatic	intergenic_region	MODIFIER	ENSSSCG00000051718-U6	ENSSSCG00000051718-ENSSSCG00000018929	snv
	13	11284611	G	T	0.588235	WZS01853-ZF3_153-Cas9	control_CRISPR	somatic	intron_variant	MODIFIER	THRB	ENSSSCG00000036033	snv
	13	141994809	C	T	0.520548	WZS01853-ZF3_153-Cas9	control_CRISPR	somatic	intergenic_region	MODIFIER	U6-ENSSSCG00000047451	ENSSSCG00000019813-ENSSSCG00000047451	snv
	5	74373861	G	GA	0.484211	WZS01853-ZF3_153-Cas9	control_CRISPR	somatic	intergenic_region	MODIFIER	ENSSSCG00000047319-ADAMTS20	ENSSSCG00000047319-ENSSSCG00000000795	indel
	13	63517458	AT	A	0.484536	WZS01853-ZF3_153-Cas9	control_CRISPR	somatic	intron_variant	MODIFIER	GRM7	ENSSSCG00000023891	indel
	13	130493988	C	A	0.38961	WZS01853-ZF3_153-Cas9	control_CRISPR	somatic	intron_variant	MODIFIER	ENSSSCG00000011821	ENSSSCG00000011821	snv
	17	6969679	C	A	0.509615	WZS01853-ZF3_153-Cas9	control_CRISPR	somatic	intergenic_region	MODIFIER	ENSSSCG00000048723-ENSSSCG00000041095	ENSSSCG00000048723-ENSSSCG00000041095	snv
	1	48973685	A	G	0.545455	WZS01853-ZF3_153-Cas9	control_CRISPR	somatic	intron_variant	MODIFIER	ADGRB3	ENSSSCG00000004270	snv
	1	5687095	G	T	0.450549	WZS01853-ZF3_153-Cas9	control_CRISPR	somatic	intron_variant	MODIFIER	PRKN	ENSSSCG00000004032	snv
	2	23122202	A	G	0.342342	WZS01853-ZF3_153-Cas9	control_CRISPR	somatic	intergenic_region	MODIFIER	ENSSSCG00000050877-ENSSSCG00000045070	ENSSSCG00000050877-ENSSSCG00000045070	snv
	2	149174433	A	T	0.5	WZS01853-ZF3_153-Cas9	control_CRISPR	somatic	intergenic_region	MODIFIER	C5orf46-SPINK5	ENSSSCG00000034399-ENSSSCG00000014422	snv
	16	14984450	C	A	0.381818	WZS01853-ZF3_153-Cas9	control_CRISPR	somatic	intergenic_region	MODIFIER	ENSSSCG00000043773-U6	ENSSSCG00000043773-ENSSSCG00000018997	snv
	14	14050725	C	G	0.430894	WZS01853-ZF3_153-Cas9	control_CRISPR	somatic	intergenic_region	MODIFIER	PINX1-XKR6	ENSSSCG00000009692-ENSSSCG00000009693	snv
	9	94031611	T	G	0.589474	WZS01853-ZF3_153-Cas9	control_CRISPR	somatic	intergenic_region	MODIFIER	GRM3-ENSSSCG00000042783	ENSSSCG00000015395-ENSSSCG00000042783	snv
	9	64647333	AT	A	0.513761	WZS01853-ZF3_153-Cas9	control_CRISPR	somatic	intergenic_region	MODIFIER	SNRPE-SOX13	ENSSSCG00000023562-ENSSSCG00000015277	indel
	8	50788962	C	CTT	0.444444	WZS01853-ZF3_153-Cas9	control_CRISPR	somatic	intron_variant	MODIFIER	FSTL5	ENSSSCG00000027183	indel
	13	165706839	C	A	0.330275	WZS01853-ZF3_153-Cas9	control_CRISPR	somatic	intergenic_region	MODIFIER	ENSSSCG00000051136-NSUN3	ENSSSCG00000051136-ENSSSCG00000027432	snv
	9	113350920	C	A	0.496296	WZS01853-ZF3_153-Cas9	control_CRISPR	somatic	intron_variant	MODIFIER	NOBOX	ENSSSCG00000024977	snv
	17	51133859	G	T	0.51145	WZS01853-ZF3_153-Cas9	control_CRISPR	somatic	intron_variant	MODIFIER	KCNB1	ENSSSCG00000007462	snv
	8	103935899	A	G	0.248322	WZS01853-ZF3_153-Cas9	control_CRISPR	somatic	synonymous_variant	LOW	MAD2L1	ENSSSCG00000036256	snv
	9	30082815	A	G	0.464286	WZS01853-ZF3_153-Cas9	control_CRISPR	somatic	intergenic_region	MODIFIER	ENSSSCG00000033271-ENSSSCG00000043295	ENSSSCG00000033271-ENSSSCG00000043295	snv
	6	116503499	C	A	0.550847	WZS01853-ZF3_153-Cas9	control_CRISPR	somatic	intergenic_region	MODIFIER	GAREM1-KLHL14	ENSSSCG00000003731-ENSSSCG00000003733	snv
	11	54023052	G	A	0.542857	WZS01853-ZF3_153-Cas9	control_CRISPR	somatic	intergenic_region	MODIFIER	ENSSSCG00000045873-ENSSSCG00000004054	ENSSSCG00000045873-ENSSSCG00000004054	snv
	14	55045417	G	T	0.469388	WZS01853-ZF3_153-Cas9	control_CRISPR	somatic	intron_variant	MODIFIER	ENSSSCG00000041993	ENSSSCG00000041993	snv
	15	98953089	TA	T	0.363636	WZS01853-ZF3_153-Cas9	control_CRISPR	somatic	intergenic_region	MODIFIER	ENSSSCG00000043415-ENSSSCG00000046643	ENSSSCG00000043415-ENSSSCG00000046643	indel
	8	63673078	G	T	0.459677	WZS01853-ZF3_153-Cas9	control_CRISPR	somatic	intergenic_region	MODIFIER	EPHA5-ENSSSCG00000049899	ENSSSCG00000008919-ENSSSCG00000049899	snv
	8	50888555	A	G	0.558559	WZS01853-ZF3_153-Cas9	control_CRISPR	somatic	intron_variant	MODIFIER	FSTL5	ENSSSCG00000027183	snv
	7	79450970	A	G	0.55	WZS01853-ZF3_153-Cas9	control_CRISPR	somatic	intergenic_region	MODIFIER	ENSSSCG00000002585-ENSSSCG00000047273	ENSSSCG00000002585-ENSSSCG00000047273	snv
	2	93161021	G	T	0.550847	WZS01853-ZF3_153-Cas9	control_CRISPR	somatic	intergenic_region	MODIFIER	EDIL3-COX7C	ENSSSCG00000026780-ENSSSCG00000040325	snv
	6	65825276	C	T	0.648352	WZS01853-ZF3_153-Cas9	control_CRISPR	somatic	intergenic_region	MODIFIER	ENSSSCG00000048371-AJAP1	ENSSSCG00000048371-ENSSSCG00000031344	snv
	7	95742790	G	T	0.540741	WZS01853-ZF3_153-Cas9	control_CRISPR	somatic	upstream_gene_variant	MODIFIER	RGS6	ENSSSCG00000033093	snv
	8	86779982	G	A	0.307692	WZS01853-ZF3_153-Cas9	control_CRISPR	somatic	intergenic_region	MODIFIER	SCOC-ENSSSCG00000048695	ENSSSCG00000038550-ENSSSCG00000048695	snv
	15	76990622	T	C	0.434783	WZS01853-ZF3_153-Cas9	control_CRISPR	somatic	upstream_gene_variant	MODIFIER	GAD1	ENSSSCG00000022233	snv
	14	24047329	G	T	0.589286	WZS01853-ZF3_153-Cas9	control_CRISPR	somatic	intergenic_region	MODIFIER	ENSSSCG00000046393-ADGRD1	ENSSSCG00000046393-ENSSSCG00000009745	snv
	18	3868219	C	A	0.58	WZS01853-ZF3_153-Cas9	control_CRISPR	somatic	intron_variant	MODIFIER	DPP6	ENSSSCG00000016423	snv
	5	62550403	C	T	0.388889	WZS01853-ZF3_153-Cas9	control_CRISPR	somatic	intron_variant	MODIFIER	M6PR	ENSSSCG00000040743	snv
	15	36366900	G	T	0.524194	WZS01853-ZF3_153-Cas9	control_CRISPR	somatic	intergenic_region	MODIFIER	ENSSSCG00000050496-U6	ENSSSCG00000050496-ENSSSCG00000023144	snv
	5	84888001	G	A	0.564706	WZS01853-ZF3_153-Cas9	control_CRISPR	somatic	intron_variant	MODIFIER	ANKS1B	ENSSSCG00000022083	snv
	10	51983789	C	T	0.503937	WZS01853-ZF3_153-Cas9	control_CRISPR	somatic	intron_variant	MODIFIER	ARMC3	ENSSSCG00000011078	snv
	13	159549964	AT	A	0.462366	WZS01853-ZF3_153-Cas9	control_CRISPR	somatic	intron_variant	MODIFIER	ENSSSCG00000039367	ENSSSCG00000039367	indel
	6	76603621	G	T	0.434426	WZS01853-ZF3_153-Cas9	control_CRISPR	somatic	intergenic_region	MODIFIER	ACTL8-ENSSSCG00000043698	ENSSSCG00000024062-ENSSSCG00000043698	snv
	1	61231420	G	A	0.420635	WZS01853-ZF3_153-Cas9	control_CRISPR	somatic	upstream_gene_variant	MODIFIER	ENSSSCG00000041435	ENSSSCG00000041435	snv
	15	28220074	T	G	0.537879	WZS01853-ZF3_153-Cas9	control_CRISPR	somatic	intergenic_region	MODIFIER	ENSSSCG00000049651-ENSSSCG00000039209	ENSSSCG00000049651-ENSSSCG00000039209	snv
	14	83760960	T	G	0.5	WZS01853-ZF3_153-Cas9	control_CRISPR	somatic	intron_variant	MODIFIER	NRG3	ENSSSCG00000010344	snv
	11	51064836	G	T	0.521739	WZS01853-ZF3_153-Cas9	control_CRISPR	somatic	intergenic_region	MODIFIER	OBI1-U6	ENSSSCG00000029113-ENSSSCG00000035748	snv
	4	66338336	A	C	0.481132	WZS01853-ZF3_153-Cas9	control_CRISPR	somatic	intron_variant	MODIFIER	C8orf34	ENSSSCG00000035887	snv
	6	21972997	T	C	0.33913	WZS01853-ZF3_153-Cas9	control_CRISPR	somatic	intron_variant	MODIFIER	ENSSSCG00000047750	ENSSSCG00000047750	snv
	13	172196999	C	A	0.607843	WZS01853-ZF3_153-Cas9	control_CRISPR	somatic	intergenic_region	MODIFIER	ENSSSCG00000050907-ENSSSCG00000029127	ENSSSCG00000050907-ENSSSCG00000029127	snv
	5	13194418	G	T	0.546667	WZS01853-ZF3_153-Cas9	control_CRISPR	somatic	intergenic_region	MODIFIER	ENSSSCG00000036971-ENSSSCG00000048045	ENSSSCG00000036971-ENSSSCG00000048045	snv
	9	110212966	C	A	0.454545	WZS01853-ZF3_153-Cas9	control_CRISPR	somatic	intergenic_region	MODIFIER	ENSSSCG00000034739-ENSSSCG00000015460	ENSSSCG00000034739-ENSSSCG00000015460	snv
	14	12256856	T	C	0.352273	WZS01853-ZF3_153-Cas9	control_CRISPR	somatic	synonymous_variant	LOW	ZNF395	ENSSSCG00000009676	snv
	15	12130817	T	C	0.432432	WZS01853-ZF3_153-Cas9	control_CRISPR	somatic	intergenic_region	MODIFIER	ENSSSCG00000047966-ENSSSCG00000047486	ENSSSCG00000047966-ENSSSCG00000047486	snv
	1	5564630	A	G	0.486486	WZS01853-ZF3_153-Cas9	control_CRISPR	somatic	intron_variant	MODIFIER	PRKN	ENSSSCG00000004032	snv
	4	1858771	G	T	0.523256	WZS01853-ZF3_153-Cas9	control_CRISPR	somatic	intergenic_region	MODIFIER	ENSSSCG00000051449-ENSSSCG00000051425	ENSSSCG00000051449-ENSSSCG00000051425	snv
	13	108979840	C	A	0.537037	WZS01853-ZF3_153-Cas9	control_CRISPR	somatic	intron_variant	MODIFIER	PRKCI	ENSSSCG00000011745	snv
	15	120148727	TGA	T	0.432099	WZS01853-ZF3_153-Cas9	control_CRISPR	somatic	intron_variant	MODIFIER	TNS1	ENSSSCG00000027669	indel
	9	101534819	T	TA	0.54023	WZS01853-ZF3_153-Cas9	control_CRISPR	somatic	intron_variant	MODIFIER	MAGI2	ENSSSCG00000031780	indel
	10	18943194	A	G	0.480392	WZS01853-ZF3_153-Cas9	control_CRISPR	somatic	intron_variant	MODIFIER	SMYD3	ENSSSCG00000022034	snv
	10	54357472	A	T	0.442748	WZS01853-ZF3_153-Cas9	control_CRISPR	somatic	intron_variant	MODIFIER	PLXDC2	ENSSSCG00000032444	snv
	1	79516461	G	T	0.51	WZS01853-ZF3_153-Cas9	control_CRISPR	somatic	intergenic_region	MODIFIER	ENSSSCG00000047473-ENSSSCG00000046480	ENSSSCG00000047473-ENSSSCG00000046480	snv
	11	61073356	A	G	0.54717	WZS01853-ZF3_153-Cas9	control_CRISPR	somatic	intron_variant	MODIFIER	GPC5	ENSSSCG00000031946	snv
	13	205088963	C	T	0.373016	WZS01853-ZF3_153-Cas9	control_CRISPR	somatic	intron_variant	MODIFIER	ENSSSCG00000041102	ENSSSCG00000041102	snv
	1	213146102	TA	T	0.48913	WZS01853-ZF3_153-Cas9	control_CRISPR	somatic	intron_variant	MODIFIER	ENSSSCG00000042224	ENSSSCG00000042224	indel
	13	188294762	C	G	0.412698	WZS01853-ZF3_153-Cas9	control_CRISPR	somatic	intergenic_region	MODIFIER	ENSSSCG00000050420-ENSSSCG00000043493	ENSSSCG00000050420-ENSSSCG00000043493	snv
	7	108401604	C	T	0.342593	WZS01853-ZF3_153-Cas9	control_CRISPR	somatic	intergenic_region	MODIFIER	ENSSSCG00000043565-ENSSSCG00000046538	ENSSSCG00000043565-ENSSSCG00000046538	snv
	13	18073952	AT	A	0.444444	WZS01853-ZF3_153-Cas9	control_CRISPR	somatic	intergenic_region	MODIFIER	ENSSSCG00000051746-GPD1L	ENSSSCG00000051746-ENSSSCG00000021977	indel
	3	22880953	A	C	0.471074	WZS01853-ZF3_153-Cas9	control_CRISPR	somatic	intron_variant	MODIFIER	SCNN1B	ENSSSCG00000028923	snv
	15	30069514	CGGAGAGAGCTG	C	0.5	WZS01853-ZF3_153-Cas9	control_CRISPR	somatic	upstream_gene_variant	MODIFIER	TFCP2L1	ENSSSCG00000015732	indel
	13	74664859	C	A	0.525862	WZS01853-ZF3_153-Cas9	control_CRISPR	somatic	intergenic_region	MODIFIER	BFSP2-CDV3	ENSSSCG00000011636-ENSSSCG00000027294	snv
	8	52063917	G	A	0.528846	WZS01853-ZF3_153-Cas9	control_CRISPR	somatic	upstream_gene_variant	MODIFIER	ENSSSCG00000050729	ENSSSCG00000050729	snv
	3	117406455	A	AAC	0.428571	WZS01853-ZF3_153-Cas9	control_CRISPR	somatic	intergenic_region	MODIFIER	APOB-ENSSSCG00000048673	ENSSSCG00000008595-ENSSSCG00000048673	indel
	13	162637827	C	A	0.473118	WZS01853-ZF3_153-Cas9	control_CRISPR	somatic	intron_variant	MODIFIER	EPHA6	ENSSSCG00000033898	snv
	1	62488431	G	T	0.44898	WZS01853-ZF3_153-Cas9	control_CRISPR	somatic	intergenic_region	MODIFIER	ENSSSCG00000044734-U6	ENSSSCG00000044734-ENSSSCG00000020518	snv
	1	235462187	C	T	0.425532	WZS01853-ZF3_153-Cas9	control_CRISPR	somatic	intron_variant	MODIFIER	ENSSSCG00000049366	ENSSSCG00000049366	snv
	1	79685899	C	A	0.54902	WZS01853-ZF3_153-Cas9	control_CRISPR	somatic	intergenic_region	MODIFIER	ENSSSCG00000046480-ENSSSCG00000042555	ENSSSCG00000046480-ENSSSCG00000042555	snv
	1	220373402	A	G	0.486842	WZS01853-ZF3_153-Cas9	control_CRISPR	somatic	intergenic_region	MODIFIER	ENSSSCG00000050207-ENSSSCG00000032324	ENSSSCG00000050207-ENSSSCG00000032324	snv
	5	80105489	G	T	0.477064	WZS01853-ZF3_153-Cas9	control_CRISPR	somatic	intergenic_region	MODIFIER	CHST11-ENSSSCG00000049056	ENSSSCG00000000837-ENSSSCG00000049056	snv
	5	23217974	C	A	0.491071	WZS01853-ZF3_153-Cas9	control_CRISPR	somatic	intergenic_region	MODIFIER	U6-ATP23	ENSSSCG00000032458-ENSSSCG00000000453	snv
	3	26435620	C	A	0.354545	WZS01853-ZF3_153-Cas9	control_CRISPR	somatic	intergenic_region	MODIFIER	ENSSSCG00000045906-SYT17	ENSSSCG00000045906-ENSSSCG00000022200	snv
	2	81227134	C	T	0.214953	WZS01853-ZF3_153-Cas9	control_CRISPR	somatic	upstream_gene_variant	MODIFIER	ENSSSCG00000044502	ENSSSCG00000044502	snv
	11	28072359	C	A	0.504854	WZS01853-ZF3_153-Cas9	control_CRISPR	somatic	intergenic_region	MODIFIER	U6-ENSSSCG00000047629	ENSSSCG00000019244-ENSSSCG00000047629	snv
	13	105883340	A	T	0.545455	WZS01853-ZF3_153-Cas9	control_CRISPR	somatic	intergenic_region	MODIFIER	ENSSSCG00000033350-ZBBX	ENSSSCG00000033350-ENSSSCG00000023393	snv
	11	35347211	C	A	0.47619	WZS01853-ZF3_153-Cas9	control_CRISPR	somatic	intergenic_region	MODIFIER	ENSSSCG00000051718-U6	ENSSSCG00000051718-ENSSSCG00000018929	snv
	3	123402777	A	C	0.104167	WZS01853-ZF3_153-Cas9	control_CRISPR	somatic	intergenic_region	MODIFIER	ENSSSCG00000045521-ENSSSCG00000051420	ENSSSCG00000045521-ENSSSCG00000051420	snv
	5	96667000	A	G	0.475177	WZS01853-ZF3_153-Cas9	control_CRISPR	somatic	intergenic_region	MODIFIER	RASSF9-ALX1	ENSSSCG00000034948-ENSSSCG00000036744	snv
	6	170039423	A	G	0.507353	WZS01853-ZF3_153-Cas9	control_CRISPR	somatic	intron_variant	MODIFIER	SCMH1	ENSSSCG00000003971	snv
	11	57539855	A	AT	0.521277	WZS01853-ZF3_153-Cas9	control_CRISPR	somatic	intergenic_region	MODIFIER	ENSSSCG00000033995-ENSSSCG00000046381	ENSSSCG00000033995-ENSSSCG00000046381	indel
	3	75037948	T	C	0.345455	WZS01853-ZF3_153-Cas9	control_CRISPR	somatic	intergenic_region	MODIFIER	ETAA1-ENSSSCG00000048675	ENSSSCG00000023908-ENSSSCG00000048675	snv
	1	87557041	A	T	0.6	WZS01853-ZF3_153-Cas9	control_CRISPR	somatic	intergenic_region	MODIFIER	ENSSSCG00000048044-ENSSSCG00000044832	ENSSSCG00000048044-ENSSSCG00000044832	snv
	9	22200109	G	T	0.586207	WZS01853-ZF3_153-Cas9	control_CRISPR	somatic	intron_variant	MODIFIER	GRM5	ENSSSCG00000029865	snv
	17	60972829	C	T	0.56	WZS01853-ZF3_153-Cas9	control_CRISPR	somatic	intron_variant	MODIFIER	CDH4	ENSSSCG00000025784	snv
	6	125002081	A	T	0.530435	WZS01853-ZF3_153-Cas9	control_CRISPR	somatic	intergenic_region	MODIFIER	ENSSSCG00000047699-ENSSSCG00000042285	ENSSSCG00000047699-ENSSSCG00000042285	snv
	15	131558766	T	G	0.235294	WZS01853-ZF3_153-Cas9	control_CRISPR	somatic	intron_variant	MODIFIER	CAB39	ENSSSCG00000016266	snv
	6	78532639	C	A	0.564815	WZS01853-ZF3_153-Cas9	control_CRISPR	somatic	intergenic_region	MODIFIER	UBXN10-ENSSSCG00000046433	ENSSSCG00000003498-ENSSSCG00000046433	snv
	2	93864604	A	G	0.421053	WZS01853-ZF3_153-Cas9	control_CRISPR	somatic	intergenic_region	MODIFIER	EDIL3-COX7C	ENSSSCG00000026780-ENSSSCG00000040325	snv
	7	102721196	C	G	0.570093	WZS01853-ZF3_153-Cas9	control_CRISPR	somatic	intron_variant	MODIFIER	NRXN3	ENSSSCG00000028942	snv
	5	37043829	T	G	0.591304	WZS01853-ZF3_153-Cas9	control_CRISPR	somatic	intergenic_region	MODIFIER	U4-ENSSSCG00000044906	ENSSSCG00000044578-ENSSSCG00000044906	snv
	7	106052416	G	T	0.477612	WZS01853-ZF3_153-Cas9	control_CRISPR	somatic	intergenic_region	MODIFIER	ENSSSCG00000045920-ENSSSCG00000043996	ENSSSCG00000045920-ENSSSCG00000043996	snv
	1	127021446	C	T	0.605263	WZS01853-ZF3_153-Cas9	control_CRISPR	somatic	upstream_gene_variant	MODIFIER	EIF3J	ENSSSCG00000004691	snv
	13	164189658	C	A	0.537879	WZS01853-ZF3_153-Cas9	control_CRISPR	somatic	intergenic_region	MODIFIER	U6-ENSSSCG00000045741	ENSSSCG00000026634-ENSSSCG00000045741	snv
	16	50140633	G	A	0.571429	WZS01853-ZF3_153-Cas9	control_CRISPR	somatic	intergenic_region	MODIFIER	ENSSSCG00000050829-ENSSSCG00000046456	ENSSSCG00000050829-ENSSSCG00000046456	snv
	12	15844880	C	T	0.459459	WZS01853-ZF3_153-Cas9	control_CRISPR	somatic	intergenic_region	MODIFIER	TANC2-ENSSSCG00000039015	ENSSSCG00000017298-ENSSSCG00000039015	snv
	13	183519918	A	C	0.358209	WZS01853-ZF3_153-Cas9	control_CRISPR	somatic	intergenic_region	MODIFIER	ENSSSCG00000046591-ENSSSCG00000045802	ENSSSCG00000046591-ENSSSCG00000045802	snv
	13	127894290	A	G	0.520661	WZS01853-ZF3_153-Cas9	control_CRISPR	somatic	intergenic_region	MODIFIER	TMEM207-IL1RAP	ENSSSCG00000022341-ENSSSCG00000021206	snv
	6	112541413	C	A	0.405172	WZS01853-ZF3_153-Cas9	control_CRISPR	somatic	intron_variant	MODIFIER	CDH2	ENSSSCG00000003722	snv
	1	213588343	C	T	0.581197	WZS01853-ZF3_153-Cas9	control_CRISPR	somatic	intron_variant	MODIFIER	PTPRD	ENSSSCG00000005194	snv
	1	94872737	G	A	0.53913	WZS01853-ZF3_153-Cas9	control_CRISPR	somatic	intergenic_region	MODIFIER	ENSSSCG00000051783-ENSSSCG00000050905	ENSSSCG00000051783-ENSSSCG00000050905	snv
	4	122879279	T	C	0.454545	WZS01853-ZF3_153-Cas9	control_CRISPR	somatic	intron_variant	MODIFIER	ABCD3	ENSSSCG00000028620	snv
	2	119944970	G	C	0.43299	WZS01853-ZF3_153-Cas9	control_CRISPR	somatic	3_prime_UTR_variant	MODIFIER	ATG12	ENSSSCG00000033912	snv
	8	60587124	C	T	0.481481	WZS01853-ZF3_153-Cas9	control_CRISPR	somatic	upstream_gene_variant	MODIFIER	ENSSSCG00000048995	ENSSSCG00000048995	snv
	18	48308939	C	A	0.36	WZS01853-ZF3_153-Cas9	control_CRISPR	somatic	downstream_gene_variant	MODIFIER	STK31	ENSSSCG00000016719	snv
	6	80012838	AC	A	0.520833	WZS01853-ZF3_153-Cas9	control_CRISPR	somatic	intron_variant	MODIFIER	ENSSSCG00000030015	ENSSSCG00000030015	indel
	11	41191481	G	T	0.536	WZS01853-ZF3_153-Cas9	control_CRISPR	somatic	intergenic_region	MODIFIER	ENSSSCG00000044557-ENSSSCG00000042981	ENSSSCG00000044557-ENSSSCG00000042981	snv
	16	14906699	C	T	0.565657	WZS01853-ZF3_153-Cas9	control_CRISPR	somatic	intergenic_region	MODIFIER	ENSSSCG00000043773-U6	ENSSSCG00000043773-ENSSSCG00000018997	snv
	1	102357529	T	G	0.225806	WZS01853-ZF3_153-Cas9	control_CRISPR	somatic	intron_variant	MODIFIER	DCC	ENSSSCG00000040836	snv
	1	3960695	G	T	0.534653	WZS01853-ZF3_153-Cas9	control_CRISPR	somatic	intergenic_region	MODIFIER	ENSSSCG00000049643-ENSSSCG00000050396	ENSSSCG00000049643-ENSSSCG00000050396	snv
	8	103827396	C	A	0.410853	WZS01853-ZF3_153-Cas9	control_CRISPR	somatic	intergenic_region	MODIFIER	ENSSSCG00000049554-ENSSSCG00000009102	ENSSSCG00000049554-ENSSSCG00000009102	snv
	14	54438769	T	A	0.461538	WZS01853-ZF3_153-Cas9	control_CRISPR	somatic	intergenic_region	MODIFIER	RYR2-ENSSSCG00000046495	ENSSSCG00000010142-ENSSSCG00000046495	snv
	7	28187800	G	T	0.396226	WZS01853-ZF3_153-Cas9	control_CRISPR	somatic	intergenic_region	MODIFIER	ENSSSCG00000046478-PRIM2	ENSSSCG00000046478-ENSSSCG00000001493	snv
	12	3488695	G	T	0.410714	WZS01853-ZF3_153-Cas9	control_CRISPR	somatic	intron_variant	MODIFIER	DNAH17	ENSSSCG00000036056	snv
	9	23659974	A	G	0.492308	WZS01853-ZF3_153-Cas9	control_CRISPR	somatic	intergenic_region	MODIFIER	ENSSSCG00000042674-ENSSSCG00000045812	ENSSSCG00000042674-ENSSSCG00000045812	snv
	4	70624184	G	A	0.487395	WZS01853-ZF3_153-Cas9	control_CRISPR	somatic	intergenic_region	MODIFIER	ENSSSCG00000049167-YTHDF3	ENSSSCG00000049167-ENSSSCG00000033144	snv
	8	37232605	GA	G	0.481132	WZS01853-ZF3_153-Cas9	control_CRISPR	somatic	intron_variant	MODIFIER	GABRB1	ENSSSCG00000035621	indel
	14	94647247	C	A	0.31068	WZS01853-ZF3_153-Cas9	control_CRISPR	somatic	intergenic_region	MODIFIER	ENSSSCG00000047077-ENSSSCG00000050931	ENSSSCG00000047077-ENSSSCG00000050931	snv
	18	22724708	G	T	0.482759	WZS01853-ZF3_153-Cas9	control_CRISPR	somatic	downstream_gene_variant	MODIFIER	ENSSSCG00000046026	ENSSSCG00000046026	snv
	5	45118773	C	A	0.383838	WZS01853-ZF3_153-Cas9	control_CRISPR	somatic	intergenic_region	MODIFIER	ENSSSCG00000044976-CCDC91	ENSSSCG00000044976-ENSSSCG00000024232	snv
	2	48025001	G	T	0.42	WZS01853-ZF3_153-Cas9	control_CRISPR	somatic	intron_variant	MODIFIER	GALNT18	ENSSSCG00000013403	snv
	6	92951817	C	T	0.452174	WZS01853-ZF3_153-Cas9	control_CRISPR	somatic	upstream_gene_variant	MODIFIER	ssc-mir-9842	ENSSSCG00000046568	snv
	3	76937465	G	A	0.41	WZS01853-ZF3_153-Cas9	control_CRISPR	somatic	upstream_gene_variant	MODIFIER	CEP68	ENSSSCG00000008360	snv
	1	186985129	G	A	0.46087	WZS01853-ZF3_153-Cas9	control_CRISPR	somatic	intergenic_region	MODIFIER	SLC35F4-ARMH4	ENSSSCG00000005068-ENSSSCG00000005071	snv
	13	172690851	A	G	0.403846	WZS01853-ZF3_153-Cas9	control_CRISPR	somatic	intergenic_region	MODIFIER	ENSSSCG00000029127-U6	ENSSSCG00000029127-ENSSSCG00000031113	snv
	7	65986932	C	A	0.468966	WZS01853-ZF3_153-Cas9	control_CRISPR	somatic	intron_variant	MODIFIER	NPAS3	ENSSSCG00000001964	snv
	3	48556144	G	T	0.484848	WZS01853-ZF3_153-Cas9	control_CRISPR	somatic	intron_variant	MODIFIER	ENSSSCG00000038228	ENSSSCG00000038228	snv
	17	45453007	G	T	0.393939	WZS01853-ZF3_153-Cas9	control_CRISPR	somatic	intron_variant	MODIFIER	PTPRT	ENSSSCG00000038990	snv
	12	51441181	C	A	0.45098	WZS01853-ZF3_153-Cas9	control_CRISPR	somatic	intergenic_region	MODIFIER	ENSSSCG00000043751-MIS12	ENSSSCG00000043751-ENSSSCG00000034958	snv
	11	75029485	G	T	0.216216	WZS01853-ZF3_153-Cas9	control_CRISPR	somatic	intron_variant	MODIFIER	FAM155A	ENSSSCG00000040130	snv
	2	58546356	G	A	0.638298	WZS01853-ZF3_153-Cas9	control_CRISPR	somatic	intron_variant	MODIFIER	MAU2	ENSSSCG00000021664	snv
	4	7806623	AC	A	0.581197	WZS01853-ZF3_153-Cas9	control_CRISPR	somatic	intergenic_region	MODIFIER	ENSSSCG00000044028-ST3GAL1	ENSSSCG00000044028-ENSSSCG00000005943	indel
	6	109027883	G	T	0.217391	WZS01853-ZF3_153-Cas9	control_CRISPR	somatic	intron_variant	MODIFIER	OSBPL1A	ENSSSCG00000003712	snv
	4	2414829	G	A	0.511628	WZS01853-ZF3_153-Cas9	control_CRISPR	somatic	intergenic_region	MODIFIER	GPR20-ENSSSCG00000048659	ENSSSCG00000021284-ENSSSCG00000048659	snv
	10	18481254	G	T	0.466019	WZS01853-ZF3_153-Cas9	control_CRISPR	somatic	intron_variant	MODIFIER	SMYD3	ENSSSCG00000022034	snv
	8	103414345	C	A	0.525862	WZS01853-ZF3_153-Cas9	control_CRISPR	somatic	intergenic_region	MODIFIER	PRDM5-ENSSSCG00000049812	ENSSSCG00000009101-ENSSSCG00000049812	snv
	11	5318191	G	A	0.421488	WZS01853-ZF3_153-Cas9	control_CRISPR	somatic	non_coding_transcript_exon_variant	MODIFIER	ENSSSCG00000033434	ENSSSCG00000033434	snv
	13	6714923	A	T	0.444444	WZS01853-ZF3_153-Cas9	control_CRISPR	somatic	intergenic_region	MODIFIER	KCNH8-EFHB	ENSSSCG00000011204-ENSSSCG00000011205	snv
	14	107149543	G	T	0.377551	WZS01853-ZF3_153-Cas9	control_CRISPR	somatic	intergenic_region	MODIFIER	SORBS1-ALDH18A1	ENSSSCG00000010494-ENSSSCG00000010495	snv
	9	68336265	C	G	0.280255	WZS01853-ZF3_153-Cas9	control_CRISPR	somatic	intron_variant	MODIFIER	ADAM22	ENSSSCG00000015297	snv
	14	112613131	C	T	0.512821	WZS01853-ZF3_153-Cas9	control_CRISPR	somatic	upstream_gene_variant	MODIFIER	DPCD	ENSSSCG00000010565	snv
	3	84129846	C	T	0.513761	WZS01853-ZF3_153-Cas9	control_CRISPR	somatic	intron_variant	MODIFIER	ENSSSCG00000049247	ENSSSCG00000049247	snv
	3	123402725	C	G	0.592233	WZS01853-ZF3_153-Cas9	control_CRISPR	somatic	intergenic_region	MODIFIER	ENSSSCG00000045521-ENSSSCG00000051420	ENSSSCG00000045521-ENSSSCG00000051420	snv
	15	9804470	A	G	0.325	WZS01853-ZF3_153-Cas9	control_CRISPR	somatic	intron_variant	MODIFIER	LRP1B	ENSSSCG00000023746	snv
	13	7044998	C	T	0.5	WZS01853-ZF3_153-Cas9	control_CRISPR	somatic	stop_gained	HIGH	KAT2B	ENSSSCG00000024621	snv
	16	9891850	C	A	0.591304	WZS01853-ZF3_153-Cas9	control_CRISPR	somatic	intergenic_region	MODIFIER	ENSSSCG00000043949-ENSSSCG00000047738	ENSSSCG00000043949-ENSSSCG00000047738	snv
	3	36729671	C	G	0.543103	WZS01853-ZF3_153-Cas9	control_CRISPR	somatic	intron_variant	MODIFIER	RBFOX1	ENSSSCG00000007917	snv
	16	12011590	C	A	0.237179	WZS01853-ZF3_153-Cas9	control_CRISPR	somatic	intergenic_region	MODIFIER	ENSSSCG00000050375-CDH10	ENSSSCG00000050375-ENSSSCG00000016802	snv
	5	62390053	C	T	0.452174	WZS01853-ZF3_153-Cas9	control_CRISPR	somatic	intron_variant	MODIFIER	ENSSSCG00000024402	ENSSSCG00000024402	snv
	16	35447871	CT	C	0.528846	WZS01853-ZF3_153-Cas9	control_CRISPR	somatic	intron_variant	MODIFIER	ANKRD55	ENSSSCG00000016917	indel
	1	27816736	A	G	0.467742	WZS01853-ZF3_153-Cas9	control_CRISPR	somatic	intergenic_region	MODIFIER	MAP7-ENSSSCG00000046259	ENSSSCG00000039049-ENSSSCG00000046259	snv
	16	61447560	C	A	0.451128	WZS01853-ZF3_153-Cas9	control_CRISPR	somatic	synonymous_variant	LOW	GABRG2	ENSSSCG00000017025	snv
	7	78203202	AGACATT	A	0.522523	WZS01853-ZF3_153-Cas9	control_CRISPR	somatic	intergenic_region	MODIFIER	ENSSSCG00000042755-RNASE1	ENSSSCG00000042755-ENSSSCG00000031649	indel
	1	50969494	A	G	0.516484	WZS01853-ZF3_153-Cas9	control_CRISPR	somatic	intron_variant	MODIFIER	B3GAT2	ENSSSCG00000026246	snv
	1	176506151	T	C	0.378788	WZS01853-ZF3_153-Cas9	control_CRISPR	somatic	intergenic_region	MODIFIER	ENSSSCG00000043544-RPL10L	ENSSSCG00000043544-ENSSSCG00000005001	snv
	1	226819887	G	T	0.392857	WZS01853-ZF3_153-Cas9	control_CRISPR	somatic	intergenic_region	MODIFIER	ANXA1-RORB	ENSSSCG00000005267-ENSSSCG00000005268	snv
	1	48152395	A	T	0.581395	WZS01853-ZF3_153-Cas9	control_CRISPR	somatic	intergenic_region	MODIFIER	ENSSSCG00000050497-ENSSSCG00000047735	ENSSSCG00000050497-ENSSSCG00000047735	snv
	2	93081941	A	G	0.451923	WZS01853-ZF3_153-Cas9	control_CRISPR	somatic	intergenic_region	MODIFIER	EDIL3-COX7C	ENSSSCG00000026780-ENSSSCG00000040325	snv
	8	43753405	C	A	0.635593	WZS01853-ZF3_153-Cas9	control_CRISPR	somatic	intron_variant	MODIFIER	KLHL2	ENSSSCG00000008858	snv
	8	64704114	A	T	0.392523	WZS01853-ZF3_153-Cas9	control_CRISPR	somatic	intergenic_region	MODIFIER	ENSSSCG00000049899-ENSSSCG00000041381	ENSSSCG00000049899-ENSSSCG00000041381	snv
	8	52084054	C	G	0.604167	WZS01853-ZF3_153-Cas9	control_CRISPR	somatic	intergenic_region	MODIFIER	ENSSSCG00000049421-NPY1R	ENSSSCG00000049421-ENSSSCG00000008888	snv
	1	10676091	G	T	0.43956	WZS01853-ZF3_153-Cas9	control_CRISPR	somatic	intergenic_region	MODIFIER	ENSSSCG00000046982-ssc-mir-9787	ENSSSCG00000046982-ENSSSCG00000050400	snv
	10	30683824	C	A	0.491071	WZS01853-ZF3_153-Cas9	control_CRISPR	somatic	intron_variant	MODIFIER	SLC28A3	ENSSSCG00000010960	snv
	15	50689919	T	C	0.491228	WZS01853-ZF3_153-Cas9	control_CRISPR	somatic	intron_variant	MODIFIER	UNC5D	ENSSSCG00000015830	snv
	3	16876033	G	GAT	0.488095	WZS01853-ZF3_153-Cas9	control_CRISPR	somatic	upstream_gene_variant	MODIFIER	PSPH	ENSSSCG00000007748	indel
	8	74106248	T	C	0.469027	WZS01853-ZF3_153-Cas9	control_CRISPR	somatic	intergenic_region	MODIFIER	NPY2R-ENSSSCG00000047279	ENSSSCG00000008993-ENSSSCG00000047279	snv
	15	38318558	T	G	0.315789	WZS01853-ZF3_153-Cas9	control_CRISPR	somatic	intron_variant	MODIFIER	GPM6A	ENSSSCG00000023328	snv
	6	35158761	C	A	0.504587	WZS01853-ZF3_153-Cas9	control_CRISPR	somatic	3_prime_UTR_variant	MODIFIER	ZNF423	ENSSSCG00000002838	snv
	2	81233290	A	C	0.205607	WZS01853-ZF3_153-Cas9	control_CRISPR	somatic	intron_variant	MODIFIER	ENSSSCG00000043061	ENSSSCG00000043061	snv
	6	164137504	G	A	0.586207	WZS01853-ZF3_153-Cas9	control_CRISPR	somatic	upstream_gene_variant	MODIFIER	FOXE3	ENSSSCG00000003884	snv
	8	80069441	G	A	0.54955	WZS01853-ZF3_153-Cas9	control_CRISPR	somatic	intergenic_region	MODIFIER	ENSSSCG00000042349-NR3C2	ENSSSCG00000042349-ENSSSCG00000037766	snv
	15	77813228	C	A	0.487395	WZS01853-ZF3_153-Cas9	control_CRISPR	somatic	intron_variant	MODIFIER	DYNC1I2	ENSSSCG00000015948	snv
	7	6756094	C	G	0.504854	WZS01853-ZF3_153-Cas9	control_CRISPR	somatic	intergenic_region	MODIFIER	ssc-mir-9802-ENSSSCG00000046673	ENSSSCG00000039534-ENSSSCG00000046673	snv
	13	169225021	AT	A	0.450549	WZS01853-ZF3_153-Cas9	control_CRISPR	somatic	intergenic_region	MODIFIER	ENSSSCG00000041986-ENSSSCG00000041060	ENSSSCG00000041986-ENSSSCG00000041060	indel
	16	52734231	C	A	0.442623	WZS01853-ZF3_153-Cas9	control_CRISPR	somatic	intron_variant	MODIFIER	FGF18	ENSSSCG00000016997	snv
	8	12652899	T	G	0.467391	WZS01853-ZF3_153-Cas9	control_CRISPR	somatic	intron_variant	MODIFIER	FAM184B	ENSSSCG00000026232	snv
	1	124970089	CA	C	0.380435	WZS01853-ZF3_153-Cas9	control_CRISPR	somatic	intergenic_region	MODIFIER	ENSSSCG00000042248-SNORA70	ENSSSCG00000042248-ENSSSCG00000039033	indel
	10	11016826	A	C	0.47619	WZS01853-ZF3_153-Cas9	control_CRISPR	somatic	intron_variant	MODIFIER	ENSSSCG00000037997	ENSSSCG00000037997	snv
	8	86388273	T	G	0.446237	WZS01853-ZF3_153-Cas9	control_CRISPR	somatic	upstream_gene_variant	MODIFIER	ENSSSCG00000050817	ENSSSCG00000050817	snv
	10	56625000	G	T	0.447368	WZS01853-ZF3_153-Control	control_CRISPR	somatic	intergenic_region	MODIFIER	ENSSSCG00000044246-ENSSSCG00000049085	ENSSSCG00000044246-ENSSSCG00000049085	snv
	9	25118752	CG	C	0.521739	WZS01853-ZF3_153-Control	control_CRISPR	somatic	intergenic_region	MODIFIER	ENSSSCG00000045215-ENSSSCG00000014935	ENSSSCG00000045215-ENSSSCG00000014935	indel
	13	98130263	G	T	0.527778	WZS01853-ZF3_153-Control	control_CRISPR	somatic	intron_variant	MODIFIER	RSRC1	ENSSSCG00000027556	snv
	10	57394817	G	T	0.535088	WZS01853-ZF3_153-Control	control_CRISPR	somatic	intron_variant	MODIFIER	PARD3	ENSSSCG00000011103	snv
	13	139013298	T	C	0.542636	WZS01853-ZF3_153-Control	control_CRISPR	somatic	intron_variant	MODIFIER	POLQ	ENSSSCG00000036613	snv
	14	139363816	G	A	0.415584	WZS01853-ZF3_153-Control	control_CRISPR	somatic	intergenic_region	MODIFIER	ENSSSCG00000041578-ENSSSCG00000041295	ENSSSCG00000041578-ENSSSCG00000041295	snv
	7	6325710	A	T	0.246753	WZS01853-ZF3_153-Control	control_CRISPR	somatic	intergenic_region	MODIFIER	ENSSSCG00000041210-ssc-mir-9802	ENSSSCG00000041210-ENSSSCG00000039534	snv
	4	108893410	T	G	0.25	WZS01853-ZF3_153-Control	control_CRISPR	somatic	downstream_gene_variant	MODIFIER	ATP5PB	ENSSSCG00000037772	snv
	15	114381958	G	T	0.587156	WZS01853-ZF3_153-Control	control_CRISPR	somatic	intron_variant	MODIFIER	ERBB4	ENSSSCG00000016160	snv
	2	38863807	G	T	0.426357	WZS01853-ZF3_153-Control	control_CRISPR	somatic	intergenic_region	MODIFIER	SLC6A5-PRMT3	ENSSSCG00000037705-ENSSSCG00000013347	snv
	1	53844275	C	T	0.407895	WZS01853-ZF3_153-Control	control_CRISPR	somatic	intron_variant	MODIFIER	TBX18	ENSSSCG00000004290	snv
	1	34185495	C	T	0.52459	WZS01853-ZF3_153-Control	control_CRISPR	somatic	intron_variant	MODIFIER	ENSSSCG00000004207	ENSSSCG00000004207	snv
	11	60380511	G	T	0.53913	WZS01853-ZF3_153-Control	control_CRISPR	somatic	intron_variant	MODIFIER	ENSSSCG00000038699	ENSSSCG00000038699	snv
	15	113001468	GA	G	0.557692	WZS01853-ZF3_153-Control	control_CRISPR	somatic	upstream_gene_variant	MODIFIER	ENSSSCG00000049734	ENSSSCG00000049734	indel
	1	93420506	C	G	0.5	WZS01853-ZF3_153-Control	control_CRISPR	somatic	intergenic_region	MODIFIER	ENSSSCG00000051179-ENSSSCG00000008882	ENSSSCG00000051179-ENSSSCG00000008882	snv
	5	1148134	G	T	0.443038	WZS01853-ZF3_153-Control	control_CRISPR	somatic	intergenic_region	MODIFIER	ENSSSCG00000048559-ENSSSCG00000042193	ENSSSCG00000048559-ENSSSCG00000042193	snv
	4	1723123	C	A	0.466667	WZS01853-ZF3_153-Control	control_CRISPR	somatic	intron_variant	MODIFIER	ENSSSCG00000036022	ENSSSCG00000036022	snv
	5	37096739	G	T	0.546512	WZS01853-ZF3_153-Control	control_CRISPR	somatic	intergenic_region	MODIFIER	U4-ENSSSCG00000044906	ENSSSCG00000044578-ENSSSCG00000044906	snv
	1	171007377	A	C	0.316327	WZS01853-ZF3_153-Control	control_CRISPR	somatic	intergenic_region	MODIFIER	ENSSSCG00000044807-ENSSSCG00000044677	ENSSSCG00000044807-ENSSSCG00000044677	snv
	1	116870231	A	G	0.574468	WZS01853-ZF3_153-Control	control_CRISPR	somatic	intron_variant	MODIFIER	ENSSSCG00000049821	ENSSSCG00000049821	snv
	12	29644706	G	T	0.504065	WZS01853-ZF3_153-Control	control_CRISPR	somatic	intergenic_region	MODIFIER	ENSSSCG00000047265-KIF2B	ENSSSCG00000047265-ENSSSCG00000017599	snv
	16	1513990	AT	A	0.457447	WZS01853-ZF3_153-Control	control_CRISPR	somatic	intron_variant	MODIFIER	CTNND2	ENSSSCG00000016780	indel
	7	46264267	AT	A	0.463918	WZS01853-ZF3_153-Control	control_CRISPR	somatic	intron_variant	MODIFIER	EFHC1	ENSSSCG00000002620	indel
	9	62610498	T	C	0.457944	WZS01853-ZF3_153-Control	control_CRISPR	somatic	intron_variant	MODIFIER	ENSSSCG00000047682	ENSSSCG00000047682	snv
	13	163155162	C	G	0.529915	WZS01853-ZF3_153-Control	control_CRISPR	somatic	intron_variant	MODIFIER	EPHA6	ENSSSCG00000033898	snv
	2	58105976	G	C	0.414634	WZS01853-ZF3_153-Control	control_CRISPR	somatic	downstream_gene_variant	MODIFIER	ENSSSCG00000043316	ENSSSCG00000043316	snv
	14	9058911	T	A	0.570093	WZS01853-ZF3_153-Control	control_CRISPR	somatic	intergenic_region	MODIFIER	NEFL-DOCK5	ENSSSCG00000009649-ENSSSCG00000009650	snv
	16	42881610	A	C	0.382609	WZS01853-ZF3_153-Control	control_CRISPR	somatic	intron_variant	MODIFIER	RNF180	ENSSSCG00000016941	snv
	8	35052299	C	G	0.392523	WZS01853-ZF3_153-Control	control_CRISPR	somatic	intergenic_region	MODIFIER	KCTD8-U6	ENSSSCG00000035712-ENSSSCG00000040613	snv
	1	155683234	CA	C	0.5	WZS01853-ZF3_153-Control	control_CRISPR	somatic	intron_variant	MODIFIER	CDH19	ENSSSCG00000004885	indel
	15	71134354	G	C	0.452381	WZS01853-ZF3_153-Control	control_CRISPR	somatic	intron_variant	MODIFIER	GRB14	ENSSSCG00000015901	snv
	8	47870998	A	G	0.491667	WZS01853-ZF3_153-Control	control_CRISPR	somatic	intron_variant	MODIFIER	C4orf45	ENSSSCG00000037757	snv
	10	48477045	C	T	0.274194	WZS01853-ZF3_153-Control	control_CRISPR	somatic	downstream_gene_variant	MODIFIER	MCM10	ENSSSCG00000035059	snv
	1	273728132	G	T	0.402299	WZS01853-ZF3_153-Control	control_CRISPR	somatic	intron_variant	MODIFIER	RXRA	ENSSSCG00000038220	snv
	5	28708039	C	T	0.356589	WZS01853-ZF3_153-Control	control_CRISPR	somatic	intergenic_region	MODIFIER	C12orf66-C12orf56	ENSSSCG00000039258-ENSSSCG00000000464	snv
	3	81069583	C	A	0.439716	WZS01853-ZF3_153-Control	control_CRISPR	somatic	intergenic_region	MODIFIER	PAPOLG-ENSSSCG00000043484	ENSSSCG00000008389-ENSSSCG00000043484	snv
	1	218043891	C	A	0.511111	WZS01853-ZF3_153-Control	control_CRISPR	somatic	intron_variant	MODIFIER	GLIS3	ENSSSCG00000005224	snv
	16	56515502	A	T	0.388889	WZS01853-ZF3_153-Control	control_CRISPR	somatic	intron_variant	MODIFIER	TENM2	ENSSSCG00000017018	snv
	15	42383531	G	T	0.464567	WZS01853-ZF3_153-Control	control_CRISPR	somatic	non_coding_transcript_exon_variant	MODIFIER	ENSSSCG00000048605	ENSSSCG00000048605	snv
	13	105606223	CA	C	0.523256	WZS01853-ZF3_153-Control	control_CRISPR	somatic	intergenic_region	MODIFIER	ENSSSCG00000033350-ZBBX	ENSSSCG00000033350-ENSSSCG00000023393	indel
	8	8386889	C	G	0.388889	WZS01853-ZF3_153-Control	control_CRISPR	somatic	intergenic_region	MODIFIER	ENSSSCG00000039778-ENSSSCG00000035927	ENSSSCG00000039778-ENSSSCG00000035927	snv
	9	4384966	G	C	0.215139	WZS01853-ZF3_153-Control	control_CRISPR	somatic	intergenic_region	MODIFIER	OR51I1-ENSSSCG00000034680	ENSSSCG00000034777-ENSSSCG00000034680	snv
	8	116226024	G	A	0.527397	WZS01853-ZF3_153-Control	control_CRISPR	somatic	intergenic_region	MODIFIER	ARHGEF38-PPA2	ENSSSCG00000021764-ENSSSCG00000022788	snv
	6	124360434	G	A	0.505051	WZS01853-ZF3_153-Control	control_CRISPR	somatic	intergenic_region	MODIFIER	ENSSSCG00000042944-ENSSSCG00000047699	ENSSSCG00000042944-ENSSSCG00000047699	snv
	16	15503479	T	C	0.504505	WZS01853-ZF3_153-Control	control_CRISPR	somatic	intergenic_region	MODIFIER	ENSSSCG00000047519-ENSSSCG00000033328	ENSSSCG00000047519-ENSSSCG00000033328	snv
	9	15492278	C	T	0.482759	WZS01853-ZF3_153-Control	control_CRISPR	somatic	intergenic_region	MODIFIER	ENSSSCG00000048266-ENSSSCG00000045408	ENSSSCG00000048266-ENSSSCG00000045408	snv
	7	17391234	A	G	0.472603	WZS01853-ZF3_153-Control	control_CRISPR	somatic	intergenic_region	MODIFIER	ENSSSCG00000049691-PRL	ENSSSCG00000049691-ENSSSCG00000039721	snv
	2	2997048	G	A	0.538462	WZS01853-ZF3_153-Control	control_CRISPR	somatic	intron_variant	MODIFIER	SHANK2	ENSSSCG00000033043	snv
	13	6469505	T	A	0.408602	WZS01853-ZF3_153-Control	control_CRISPR	somatic	intron_variant	MODIFIER	KCNH8	ENSSSCG00000011204	snv
	1	12178625	C	A	0.426829	WZS01853-ZF3_153-Control	control_CRISPR	somatic	downstream_gene_variant	MODIFIER	ENSSSCG00000044991	ENSSSCG00000044991	snv
	17	63308498	G	A	0.6125	WZS01853-ZF3_153-Control	control_CRISPR	somatic	intergenic_region	MODIFIER	ENSSSCG00000044874-ENSSSCG00000036974	ENSSSCG00000044874-ENSSSCG00000036974	snv
	2	54173996	A	T	0.48951	WZS01853-ZF3_153-Control	control_CRISPR	somatic	intergenic_region	MODIFIER	ENSSSCG00000043558-ENSSSCG00000044135	ENSSSCG00000043558-ENSSSCG00000044135	snv
	9	23090256	T	A	0.552448	WZS01853-ZF3_153-Control	control_CRISPR	somatic	intron_variant	MODIFIER	TRIM77	ENSSSCG00000024966	snv
	7	108626102	T	G	0.5	WZS01853-ZF3_153-Control	control_CRISPR	somatic	intergenic_region	MODIFIER	ENSSSCG00000043565-ENSSSCG00000046538	ENSSSCG00000043565-ENSSSCG00000046538	snv
	7	75422727	G	T	0.5	WZS01853-ZF3_153-Control	control_CRISPR	somatic	intergenic_region	MODIFIER	ENSSSCG00000044085-JPH4	ENSSSCG00000044085-ENSSSCG00000002014	snv
	9	100971567	G	A	0.541176	WZS01853-ZF3_153-Control	control_CRISPR	somatic	intron_variant	MODIFIER	MAGI2	ENSSSCG00000031780	snv
	14	17419987	A	C	0.524272	WZS01853-ZF3_153-Control	control_CRISPR	somatic	intron_variant	MODIFIER	GALNTL6	ENSSSCG00000021805	snv
	1	174827676	G	A	0.546218	WZS01853-ZF3_153-Control	control_CRISPR	somatic	intergenic_region	MODIFIER	ENSSSCG00000043072-C14orf28	ENSSSCG00000043072-ENSSSCG00000030679	snv
	1	120229841	C	CT	0.470588	WZS01853-ZF3_153-Control	control_CRISPR	somatic	intron_variant	MODIFIER	DMXL2	ENSSSCG00000032517	indel
	17	6472265	C	G	0.337748	WZS01853-ZF3_153-Control	control_CRISPR	somatic	intergenic_region	MODIFIER	ENSSSCG00000049115-ENSSSCG00000048723	ENSSSCG00000049115-ENSSSCG00000048723	snv
	17	61361701	T	TCGGAC	0.405941	WZS01853-ZF3_153-Control	control_CRISPR	somatic	intron_variant	MODIFIER	CDH4	ENSSSCG00000025784	indel
	10	7100395	A	G	0.482759	WZS01853-ZF3_153-Control	control_CRISPR	somatic	intergenic_region	MODIFIER	ENSSSCG00000046986-ENSSSCG00000051588	ENSSSCG00000046986-ENSSSCG00000051588	snv
	13	163896494	A	T	0.5	WZS01853-ZF3_153-Control	control_CRISPR	somatic	intergenic_region	MODIFIER	EPHA6-U6	ENSSSCG00000033898-ENSSSCG00000026634	snv
	6	122152293	C	T	0.425926	WZS01853-ZF3_153-Control	control_CRISPR	somatic	intergenic_region	MODIFIER	ENSSSCG00000045450-ENSSSCG00000049226	ENSSSCG00000045450-ENSSSCG00000049226	snv
	11	35084929	G	C	0.537815	WZS01853-ZF3_153-Control	control_CRISPR	somatic	intergenic_region	MODIFIER	ENSSSCG00000043875-ENSSSCG00000051718	ENSSSCG00000043875-ENSSSCG00000051718	snv
	1	3630520	G	A	0.46087	WZS01853-ZF3_153-Control	control_CRISPR	somatic	intron_variant	MODIFIER	ENSSSCG00000044274	ENSSSCG00000044274	snv
	1	160100266	C	G	0.536082	WZS01853-ZF3_153-Control	control_CRISPR	somatic	intergenic_region	MODIFIER	CDH20-ENSSSCG00000048538	ENSSSCG00000004903-ENSSSCG00000048538	snv
	8	41904714	A	C	0.470588	WZS01853-ZF3_153-Control	control_CRISPR	somatic	intron_variant	MODIFIER	ENSSSCG00000043179	ENSSSCG00000043179	snv
	10	20119040	G	T	0.575472	WZS01853-ZF3_153-Control	control_CRISPR	somatic	intergenic_region	MODIFIER	ZBTB41-CRB1	ENSSSCG00000010897-ENSSSCG00000021897	snv
	13	155072373	G	C	0.516484	WZS01853-ZF3_153-Control	control_CRISPR	somatic	intergenic_region	MODIFIER	ENSSSCG00000043607-ENSSSCG00000046831	ENSSSCG00000043607-ENSSSCG00000046831	snv
	10	51732035	C	G	0.490909	WZS01853-ZF3_153-Control	control_CRISPR	somatic	intron_variant	MODIFIER	ENSSSCG00000021093	ENSSSCG00000021093	snv
	1	48432286	A	G	0.517241	WZS01853-ZF3_153-Control	control_CRISPR	somatic	intergenic_region	MODIFIER	ENSSSCG00000050497-ENSSSCG00000047735	ENSSSCG00000050497-ENSSSCG00000047735	snv
	8	62990217	G	C	0.506494	WZS01853-ZF3_153-Control	control_CRISPR	somatic	intergenic_region	MODIFIER	TECRL-ENSSSCG00000041794	ENSSSCG00000024681-ENSSSCG00000041794	snv
	16	13521630	G	T	0.481132	WZS01853-ZF3_153-Control	control_CRISPR	somatic	intergenic_region	MODIFIER	ENSSSCG00000042931-CDH9	ENSSSCG00000042931-ENSSSCG00000020845	snv
	1	157206382	C	A	0.51938	WZS01853-ZF3_153-Control	control_CRISPR	somatic	intergenic_region	MODIFIER	ENSSSCG00000045840-ENSSSCG00000041887	ENSSSCG00000045840-ENSSSCG00000041887	snv
	9	112665008	C	A	0.260504	WZS01853-ZF3_153-Control	control_CRISPR	somatic	intergenic_region	MODIFIER	ENSSSCG00000045606-ENSSSCG00000041559	ENSSSCG00000045606-ENSSSCG00000041559	snv
	8	90497484	G	A	0.435185	WZS01853-ZF3_153-Control	control_CRISPR	somatic	intergenic_region	MODIFIER	ENSSSCG00000043227-ENSSSCG00000051283	ENSSSCG00000043227-ENSSSCG00000051283	snv
	4	55775282	C	T	0.247619	WZS01853-ZF3_153-Control	control_CRISPR	somatic	intron_variant	MODIFIER	ZNF704	ENSSSCG00000022989	snv
	1	263581928	G	C	0.277372	WZS01853-ZF3_153-Control	control_CRISPR	somatic	intergenic_region	MODIFIER	ENSSSCG00000034582-ENSSSCG00000050620	ENSSSCG00000034582-ENSSSCG00000050620	snv
	8	52236869	A	C	0.219512	WZS01853-ZF3_153-Control	control_CRISPR	somatic	intergenic_region	MODIFIER	NPY5R-ENSSSCG00000042241	ENSSSCG00000008889-ENSSSCG00000042241	snv
	1	146696612	G	T	0.478632	WZS01853-ZF3_153-Control	control_CRISPR	somatic	intergenic_region	MODIFIER	ENSSSCG00000036442-ENSSSCG00000044951	ENSSSCG00000036442-ENSSSCG00000044951	snv
	8	113584008	G	T	0.434109	WZS01853-ZF3_153-Control	control_CRISPR	somatic	intergenic_region	MODIFIER	ENSSSCG00000044738-ENSSSCG00000044193	ENSSSCG00000044738-ENSSSCG00000044193	snv
	13	183686386	T	A	0.531532	WZS01853-ZF3_153-Control	control_CRISPR	somatic	intergenic_region	MODIFIER	ENSSSCG00000045802-ENSSSCG00000038421	ENSSSCG00000045802-ENSSSCG00000038421	snv
	1	50759210	G	A	0.409091	WZS01853-ZF3_153-Control	control_CRISPR	somatic	intron_variant	MODIFIER	SMAP1	ENSSSCG00000004276	snv
	8	129056791	C	T	0.307692	WZS01853-ZF3_153-Control	control_CRISPR	somatic	intergenic_region	MODIFIER	CCSER1-MMRN1	ENSSSCG00000022986-ENSSSCG00000009202	snv
	3	66834504	A	G	0.528846	WZS01853-ZF3_153-Control	control_CRISPR	somatic	intron_variant	MODIFIER	LRRTM4	ENSSSCG00000008259	snv
	3	26936695	G	A	0.238095	WZS01853-ZF3_153-Control	control_CRISPR	somatic	intergenic_region	MODIFIER	ENSSSCG00000043289-ENSSSCG00000042131	ENSSSCG00000043289-ENSSSCG00000042131	snv
	13	177635927	T	G	0.435897	WZS01853-ZF3_153-Control	control_CRISPR	somatic	intron_variant	MODIFIER	ROBO2	ENSSSCG00000012002	snv
	4	70476701	C	G	0.413793	WZS01853-ZF3_153-Control	control_CRISPR	somatic	intergenic_region	MODIFIER	ENSSSCG00000048671-ENSSSCG00000039702	ENSSSCG00000048671-ENSSSCG00000039702	snv
	14	140196943	G	T	0.53	WZS01853-ZF3_153-Control	control_CRISPR	somatic	intergenic_region	MODIFIER	ENSSSCG00000047025-ENSSSCG00000027988	ENSSSCG00000047025-ENSSSCG00000027988	snv
	11	41308767	TA	T	0.521739	WZS01853-ZF3_153-Control	control_CRISPR	somatic	intergenic_region	MODIFIER	ENSSSCG00000042981-ENSSSCG00000051740	ENSSSCG00000042981-ENSSSCG00000051740	indel
	15	99944569	C	T	0.515152	WZS01853-ZF3_153-Control	control_CRISPR	somatic	intron_variant	MODIFIER	DNAH7	ENSSSCG00000032814	snv
	15	35656102	A	G	0.213592	WZS01853-ZF3_153-Control	control_CRISPR	somatic	intergenic_region	MODIFIER	ENSSSCG00000047354-ENSSSCG00000046725	ENSSSCG00000047354-ENSSSCG00000046725	snv
	15	98541030	G	T	0.526316	WZS01853-ZF3_153-Control	control_CRISPR	somatic	intergenic_region	MODIFIER	U2-ENSSSCG00000046893	ENSSSCG00000049246-ENSSSCG00000046893	snv
	1	178354472	T	G	0.471154	WZS01853-ZF3_153-Control	control_CRISPR	somatic	intron_variant	MODIFIER	ENSSSCG00000041258	ENSSSCG00000041258	snv
	8	73314358	A	T	0.613445	WZS01853-ZF3_153-Control	control_CRISPR	somatic	intron_variant	MODIFIER	CNOT6L	ENSSSCG00000008989	snv
	8	20034924	T	C	0.244444	WZS01853-ZF3_153-Control	control_CRISPR	somatic	intron_variant	MODIFIER	RBPJ	ENSSSCG00000022155	snv
	8	127017022	T	C	0.188034	WZS01853-ZF3_153-Control	control_CRISPR	somatic	intergenic_region	MODIFIER	ENSSSCG00000041292-ENSSSCG00000048161	ENSSSCG00000041292-ENSSSCG00000048161	snv
	9	104179294	T	A	0.456	WZS01853-ZF3_153-Control	control_CRISPR	somatic	intergenic_region	MODIFIER	ORC5-LHFPL3	ENSSSCG00000015427-ENSSSCG00000035554	snv
	1	96975235	C	A	0.535714	WZS01853-ZF3_153-Control	control_CRISPR	somatic	intergenic_region	MODIFIER	SKOR2-SMAD2	ENSSSCG00000005767-ENSSSCG00000004505	snv
	3	97808559	AT	A	0.568182	WZS01853-ZF3_153-Control	control_CRISPR	somatic	intergenic_region	MODIFIER	MTA3-KCNG3	ENSSSCG00000008464-ENSSSCG00000008465	indel
	6	71392716	G	T	0.467742	WZS01853-ZF3_153-Control	control_CRISPR	somatic	synonymous_variant	LOW	MTOR	ENSSSCG00000003413	snv
	15	40378066	T	C	0.615385	WZS01853-ZF3_153-Control	control_CRISPR	somatic	intergenic_region	MODIFIER	ENSSSCG00000049401-ENSSSCG00000045939	ENSSSCG00000049401-ENSSSCG00000045939	snv
	5	59167964	C	T	0.467742	WZS01853-ZF3_153-Control	control_CRISPR	somatic	intergenic_region	MODIFIER	GRIN2B-EMP1	ENSSSCG00000000614-ENSSSCG00000036723	snv
	11	38334178	G	T	0.469388	WZS01853-ZF3_153-Control	control_CRISPR	somatic	intergenic_region	MODIFIER	ENSSSCG00000051326-PCDH9	ENSSSCG00000051326-ENSSSCG00000038842	snv
	1	78800930	A	G	0.375	WZS01853-ZF3_153-Control	control_CRISPR	somatic	intergenic_region	MODIFIER	ENSSSCG00000048426-ENSSSCG00000049926	ENSSSCG00000048426-ENSSSCG00000049926	snv
	9	135864333	A	G	0.507937	WZS01853-ZF3_153-Control	control_CRISPR	somatic	intergenic_region	MODIFIER	ENSSSCG00000048986-ENSSSCG00000047450	ENSSSCG00000048986-ENSSSCG00000047450	snv
	8	58780425	C	A	0.641667	WZS01853-ZF3_153-Control	control_CRISPR	somatic	intergenic_region	MODIFIER	ENSSSCG00000048506-ENSSSCG00000049794	ENSSSCG00000048506-ENSSSCG00000049794	snv
	2	59424279	TC	T	0.419048	WZS01853-ZF3_153-Control	control_CRISPR	somatic	intron_variant	MODIFIER	LRRC25	ENSSSCG00000036963	indel
	11	75357119	C	A	0.555556	WZS01853-ZF3_153-Control	control_CRISPR	somatic	downstream_gene_variant	MODIFIER	ENSSSCG00000049528	ENSSSCG00000049528	snv
	1	5626831	A	C	0.404494	WZS01853-ZF3_153-Control	control_CRISPR	somatic	intron_variant	MODIFIER	PRKN	ENSSSCG00000004032	snv
	4	1449589	C	A	0.296296	WZS01853-ZF3_153-Control	control_CRISPR	somatic	upstream_gene_variant	MODIFIER	LYNX1	ENSSSCG00000031724	snv
	4	62679642	C	A	0.525926	WZS01853-ZF3_153-Control	control_CRISPR	somatic	intergenic_region	MODIFIER	C8orf89-ENSSSCG00000048353	ENSSSCG00000032228-ENSSSCG00000048353	snv
	11	42942375	C	T	0.295775	WZS01853-ZF3_153-Control	control_CRISPR	somatic	intron_variant	MODIFIER	ENSSSCG00000048820	ENSSSCG00000048820	snv
	1	188560258	C	T	0.450382	WZS01853-ZF3_153-Control	control_CRISPR	somatic	intergenic_region	MODIFIER	DAAM1-GPR135	ENSSSCG00000005078-ENSSSCG00000032928	snv
	3	51979100	G	A	0.519231	WZS01853-ZF3_153-Control	control_CRISPR	somatic	downstream_gene_variant	MODIFIER	ENSSSCG00000042975	ENSSSCG00000042975	snv
	3	53885745	C	T	0.5	WZS01853-ZF3_153-Control	control_CRISPR	somatic	intron_variant	MODIFIER	CHST10	ENSSSCG00000008175	snv
	7	71766150	C	T	0.516667	WZS01853-ZF3_153-Control	control_CRISPR	somatic	intergenic_region	MODIFIER	ENSSSCG00000044229-ENSSSCG00000046287	ENSSSCG00000044229-ENSSSCG00000046287	snv
	15	11948352	T	A	0.42268	WZS01853-ZF3_153-Control	control_CRISPR	somatic	intergenic_region	MODIFIER	ENSSSCG00000047966-ENSSSCG00000047486	ENSSSCG00000047966-ENSSSCG00000047486	snv
	18	37053995	C	T	0.387097	WZS01853-ZF3_153-Control	control_CRISPR	somatic	intergenic_region	MODIFIER	ENSSSCG00000048320-ENSSSCG00000045628	ENSSSCG00000048320-ENSSSCG00000045628	snv
	1	172195998	T	C	0.542056	WZS01853-ZF3_153-Control	control_CRISPR	somatic	intergenic_region	MODIFIER	LRFN5-ENSSSCG00000041306	ENSSSCG00000004990-ENSSSCG00000041306	snv
	11	41308774	A	G	0.510638	WZS01853-ZF3_153-Control	control_CRISPR	somatic	intergenic_region	MODIFIER	ENSSSCG00000042981-ENSSSCG00000051740	ENSSSCG00000042981-ENSSSCG00000051740	snv
	13	103459388	GA	G	0.555556	WZS01853-ZF3_153-Control	control_CRISPR	somatic	intergenic_region	MODIFIER	ENSSSCG00000045945-ENSSSCG00000020451	ENSSSCG00000045945-ENSSSCG00000020451	indel
	4	71467355	T	G	0.458333	WZS01853-ZF3_153-Control	control_CRISPR	somatic	intergenic_region	MODIFIER	ENSSSCG00000049311-ENSSSCG00000042611	ENSSSCG00000049311-ENSSSCG00000042611	snv
	8	107960486	T	A	0.52	WZS01853-ZF3_153-Control	control_CRISPR	somatic	intron_variant	MODIFIER	NDST4	ENSSSCG00000033834	snv
	6	101367489	A	G	0.440678	WZS01853-ZF3_153-Control	control_CRISPR	somatic	intergenic_region	MODIFIER	ENSSSCG00000048839-EPB41L3	ENSSSCG00000048839-ENSSSCG00000003687	snv
	14	60609851	C	T	0.384615	WZS01853-ZF3_153-Control	control_CRISPR	somatic	intergenic_region	MODIFIER	ENSSSCG00000041847-RHOU	ENSSSCG00000041847-ENSSSCG00000024418	snv
	8	128150798	C	CATTT	0.472222	WZS01853-ZF3_153-Control	control_CRISPR	somatic	intron_variant	MODIFIER	CCSER1	ENSSSCG00000022986	indel
	16	74545610	C	G	0.526316	WZS01853-ZF3_153-Control	control_CRISPR	somatic	intergenic_region	MODIFIER	ADCY2-ENSSSCG00000048006	ENSSSCG00000017101-ENSSSCG00000048006	snv
	5	89141331	G	C	0.493671	WZS01853-ZF3_153-Control	control_CRISPR	somatic	intergenic_region	MODIFIER	ENSSSCG00000049648-ENSSSCG00000045031	ENSSSCG00000049648-ENSSSCG00000045031	snv
	13	20633489	A	G	0.474453	WZS01853-ZF3_153-Control	control_CRISPR	somatic	intron_variant	MODIFIER	ENSSSCG00000041299	ENSSSCG00000041299	snv
	9	86268319	A	ATTT	0.464567	WZS01853-ZF3_153-Control	control_CRISPR	somatic	non_coding_transcript_exon_variant	MODIFIER	ENSSSCG00000046663	ENSSSCG00000046663	indel
	11	53986780	G	A	0.37931	WZS01853-ZF3_153-Control	control_CRISPR	somatic	intergenic_region	MODIFIER	ENSSSCG00000045873-ENSSSCG00000004054	ENSSSCG00000045873-ENSSSCG00000004054	snv
	7	1495136	C	T	0.423077	WZS01853-ZF3_153-Control	control_CRISPR	somatic	intron_variant	MODIFIER	ENSSSCG00000043311	ENSSSCG00000043311	snv
	13	182533272	C	A	0.53719	WZS01853-ZF3_153-Control	control_CRISPR	somatic	intron_variant	MODIFIER	CHODL	ENSSSCG00000012018	snv
	7	75420508	A	C	0.550459	WZS01853-ZF3_153-Control	control_CRISPR	somatic	intergenic_region	MODIFIER	ENSSSCG00000044085-JPH4	ENSSSCG00000044085-ENSSSCG00000002014	snv
	15	124967082	A	T	0.285714	WZS01853-ZF3_153-Control	control_CRISPR	somatic	intergenic_region	MODIFIER	ENSSSCG00000032296-ENSSSCG00000046553	ENSSSCG00000032296-ENSSSCG00000046553	snv
	12	58064183	G	A	0.439024	WZS01853-ZF3_153-Control	control_CRISPR	somatic	intron_variant	MODIFIER	COX10	ENSSSCG00000018023	snv
	15	113759580	G	T	0.567901	WZS01853-ZF3_153-Control	control_CRISPR	somatic	intergenic_region	MODIFIER	ENSSSCG00000050333-ERBB4	ENSSSCG00000050333-ENSSSCG00000016160	snv
	3	51026456	TA	T	0.484536	WZS01853-ZF3_153-Control	control_CRISPR	somatic	intergenic_region	MODIFIER	ENSSSCG00000036710-ENSSSCG00000049447	ENSSSCG00000036710-ENSSSCG00000049447	indel
	5	68865911	C	T	0.431579	WZS01853-ZF3_153-Control	control_CRISPR	somatic	intron_variant	MODIFIER	CACNA2D4	ENSSSCG00000026537	snv
	4	83721446	C	T	0.382812	WZS01853-ZF3_153-Control	control_CRISPR	somatic	intron_variant	MODIFIER	POU2F1	ENSSSCG00000006310	snv
	4	70727583	T	G	0.48	WZS01853-ZF3_153-Control	control_CRISPR	somatic	intergenic_region	MODIFIER	ENSSSCG00000049167-YTHDF3	ENSSSCG00000049167-ENSSSCG00000033144	snv
	1	257058744	T	G	0.504065	WZS01853-ZF3_153-Control	control_CRISPR	somatic	intron_variant	MODIFIER	ASTN2	ENSSSCG00000005502	snv
	8	89621782	C	A	0.268519	WZS01853-ZF3_153-Control	control_CRISPR	somatic	intron_variant	MODIFIER	ENSSSCG00000041329	ENSSSCG00000041329	snv
	14	94942204	A	C	0.462963	WZS01853-ZF3_153-Control	control_CRISPR	somatic	intergenic_region	MODIFIER	ENSSSCG00000043392-ENSSSCG00000041260	ENSSSCG00000043392-ENSSSCG00000041260	snv
	4	5380295	T	G	0.542857	WZS01853-ZF3_153-Control	control_CRISPR	somatic	intergenic_region	MODIFIER	ENSSSCG00000033680-ENSSSCG00000044937	ENSSSCG00000033680-ENSSSCG00000044937	snv
	4	91748722	T	A	0.449153	WZS01853-ZF3_153-Control	control_CRISPR	somatic	upstream_gene_variant	MODIFIER	ENSSSCG00000045772	ENSSSCG00000045772	snv
	17	40949524	A	T	0.382353	WZS01853-ZF3_153-Control	control_CRISPR	somatic	downstream_gene_variant	MODIFIER	CTNNBL1	ENSSSCG00000007337	snv
	2	112798978	T	C	0.212329	WZS01853-ZF3_153-Control	control_CRISPR	somatic	intron_variant	MODIFIER	EFNA5	ENSSSCG00000036520	snv
	1	125374989	C	A	0.208333	WZS01853-ZF3_153-Control	control_CRISPR	somatic	intergenic_region	MODIFIER	ENSSSCG00000050164-ENSSSCG00000045481	ENSSSCG00000050164-ENSSSCG00000045481	snv
	17	18915233	T	C	0.460177	WZS01853-ZF3_153-Control	control_CRISPR	somatic	intergenic_region	MODIFIER	PAK5-ANKEF1	ENSSSCG00000007061-ENSSSCG00000007063	snv
	6	65128547	C	T	0.333333	WZS01853-ZF3_153-Control	control_CRISPR	somatic	intron_variant	MODIFIER	MEGF6	ENSSSCG00000024678	snv
	14	19727928	A	G	0.512821	WZS01853-ZF3_153-Control	control_CRISPR	somatic	intergenic_region	MODIFIER	ENSSSCG00000031747-AADAT	ENSSSCG00000031747-ENSSSCG00000009708	snv
	6	144481823	C	T	0.52	WZS01853-ZF3_153-Control	control_CRISPR	somatic	intron_variant	MODIFIER	WLS	ENSSSCG00000003795	snv
	14	10897062	T	A	0.477273	WZS01853-ZF3_153-Control	control_CRISPR	somatic	intergenic_region	MODIFIER	ssc-mir-9854-ENSSSCG00000044506	ENSSSCG00000047514-ENSSSCG00000044506	snv
	2	23490085	T	G	0.419048	WZS01853-ZF3_153-Control	control_CRISPR	somatic	intergenic_region	MODIFIER	ENSSSCG00000050877-ENSSSCG00000045070	ENSSSCG00000050877-ENSSSCG00000045070	snv
	15	134906165	G	GT	0.430556	WZS01853-ZF3_153-Control	control_CRISPR	somatic	intergenic_region	MODIFIER	ENSSSCG00000043599-ENSSSCG00000046337	ENSSSCG00000043599-ENSSSCG00000046337	indel
	13	80599891	G	T	0.454545	WZS01853-ZF3_153-Control	control_CRISPR	somatic	intergenic_region	MODIFIER	NMNAT3-CLSTN2	ENSSSCG00000031142-ENSSSCG00000011666	snv
	5	13970189	T	G	0.475728	WZS01853-ZF3_153-Control	control_CRISPR	somatic	missense_variant	MODERATE	TCP11L2	ENSSSCG00000024881	snv
	1	177966259	G	T	0.438462	WZS01853-ZF3_153-Control	control_CRISPR	somatic	intergenic_region	MODIFIER	ENSSSCG00000044998-ENSSSCG00000041258	ENSSSCG00000044998-ENSSSCG00000041258	snv
	7	44701458	G	A	0.505376	WZS01853-ZF3_153-Control	control_CRISPR	somatic	intron_variant	MODIFIER	TFAP2D	ENSSSCG00000001744	snv
	1	131600683	C	A	0.468085	WZS01853-ZF3_153-Control	control_CRISPR	somatic	intron_variant	MODIFIER	FSIP1	ENSSSCG00000040418	snv
	5	1239009	C	T	0.415385	WZS01853-ZF3_153-Control	control_CRISPR	somatic	intergenic_region	MODIFIER	ENSSSCG00000048559-ENSSSCG00000042193	ENSSSCG00000048559-ENSSSCG00000042193	snv
	4	45403483	C	T	0.543478	WZS01853-ZF3_153-Control	control_CRISPR	somatic	downstream_gene_variant	MODIFIER	ENSSSCG00000050942	ENSSSCG00000050942	snv
	1	105315474	CA	C	0.466667	WZS01853-ZF3_153-Control	control_CRISPR	somatic	intergenic_region	MODIFIER	ENSSSCG00000051116-TXNL1	ENSSSCG00000051116-ENSSSCG00000004537	indel
	3	115415952	C	A	0.535211	WZS01853-ZF3_153-Control	control_CRISPR	somatic	downstream_gene_variant	MODIFIER	ENSSSCG00000049469	ENSSSCG00000049469	snv
	1	93749421	G	A	0.253012	WZS01853-ZF3_153-Control	control_CRISPR	somatic	intergenic_region	MODIFIER	ENSSSCG00000051179-ENSSSCG00000008882	ENSSSCG00000051179-ENSSSCG00000008882	snv
	1	120855452	T	C	0.486239	WZS01853-ZF3_153-Control	control_CRISPR	somatic	intron_variant	MODIFIER	AP4E1	ENSSSCG00000004634	snv
	11	20650738	C	A	0.513274	WZS01853-ZF3_153-Control	control_CRISPR	somatic	upstream_gene_variant	MODIFIER	ESD	ENSSSCG00000009407	snv
	16	13014633	T	G	0.553191	WZS01853-ZF3_153-Control	control_CRISPR	somatic	intergenic_region	MODIFIER	U6-ENSSSCG00000045389	ENSSSCG00000033714-ENSSSCG00000045389	snv
	13	191978585	T	C	0.545455	WZS01853-ZF3_153-Control	control_CRISPR	somatic	intergenic_region	MODIFIER	ENSSSCG00000048685-U2	ENSSSCG00000048685-ENSSSCG00000045188	snv
	14	35519931	GT	G	0.477876	WZS01853-ZF3_153-Control	control_CRISPR	somatic	intron_variant	MODIFIER	FBXW8	ENSSSCG00000009860	indel
	18	16913931	C	T	0.5	WZS01853-ZF3_153-Control	control_CRISPR	somatic	intron_variant	MODIFIER	PLXNA4	ENSSSCG00000021562	snv
	11	58861544	G	A	0.421488	WZS01853-ZF3_153-Control	control_CRISPR	somatic	intergenic_region	MODIFIER	ENSSSCG00000050699-ENSSSCG00000048437	ENSSSCG00000050699-ENSSSCG00000048437	snv
	13	20294373	T	C	0.255814	WZS01853-ZF3_153-Control	control_CRISPR	somatic	intron_variant	MODIFIER	ENSSSCG00000044082	ENSSSCG00000044082	snv
	3	36338656	A	C	0.525862	WZS01853-ZF3_153-Control	control_CRISPR	somatic	intron_variant	MODIFIER	RBFOX1	ENSSSCG00000007917	snv
	9	35416051	C	A	0.405172	WZS01853-ZF3_153-Control	control_CRISPR	somatic	intergenic_region	MODIFIER	ENSSSCG00000048638-GRIA4	ENSSSCG00000048638-ENSSSCG00000030565	snv
	2	2657783	G	T	0.456897	WZS01853-ZF3_153-Control	control_CRISPR	somatic	intron_variant	MODIFIER	SHANK2	ENSSSCG00000033043	snv
	11	49967479	A	G	0.33913	WZS01853-ZF3_153-Control	control_CRISPR	somatic	intergenic_region	MODIFIER	SLAIN1-EDNRB	ENSSSCG00000009475-ENSSSCG00000009477	snv
	11	40203582	A	T	0.393162	WZS01853-ZF3_153-Control	control_CRISPR	somatic	intergenic_region	MODIFIER	ENSSSCG00000047489-ENSSSCG00000048977	ENSSSCG00000047489-ENSSSCG00000048977	snv
	6	117641370	A	C	0.223214	WZS01853-ZF3_153-Control	control_CRISPR	somatic	downstream_gene_variant	MODIFIER	NOL4	ENSSSCG00000003737	snv
	4	112834195	G	A	0.441667	WZS01853-ZF3_153-Control	control_CRISPR	somatic	intergenic_region	MODIFIER	PRMT6-ENSSSCG00000045057	ENSSSCG00000006853-ENSSSCG00000045057	snv
	9	108519493	T	G	0.470149	WZS01853-ZF3_153-Control	control_CRISPR	somatic	intergenic_region	MODIFIER	EPDR1-ENSSSCG00000043423	ENSSSCG00000020963-ENSSSCG00000043423	snv
	13	54668702	C	A	0.476923	WZS01853-ZF3_153-Control	control_CRISPR	somatic	intron_variant	MODIFIER	PDZRN3	ENSSSCG00000011521	snv
	10	34611566	G	T	0.45045	WZS01853-ZF3_153-Control	control_CRISPR	somatic	intergenic_region	MODIFIER	ENSSSCG00000051170-ENSSSCG00000045956	ENSSSCG00000051170-ENSSSCG00000045956	snv
	11	33066201	C	T	0.503759	WZS01853-ZF3_153-Control	control_CRISPR	somatic	intergenic_region	MODIFIER	DIAPH3-TDRD3	ENSSSCG00000009448-ENSSSCG00000009449	snv
	2	55224932	A	G	0.462687	WZS01853-ZF3_153-Control	control_CRISPR	somatic	intergenic_region	MODIFIER	ENSSSCG00000037896-ENSSSCG00000036934	ENSSSCG00000037896-ENSSSCG00000036934	snv
	5	39051920	G	A	0.490196	WZS01853-ZF3_153-Control	control_CRISPR	somatic	intergenic_region	MODIFIER	U6-ENSSSCG00000043676	ENSSSCG00000049116-ENSSSCG00000043676	snv
	8	43701846	G	A	0.398058	WZS01853-ZF3_153-Control	control_CRISPR	somatic	intergenic_region	MODIFIER	CPE-MSMO1	ENSSSCG00000008854-ENSSSCG00000008857	snv
	1	47757293	A	G	0.5	WZS01853-ZF3_153-Control	control_CRISPR	somatic	intergenic_region	MODIFIER	U2-ENSSSCG00000050497	ENSSSCG00000043187-ENSSSCG00000050497	snv
	9	4972530	A	C	0.305389	WZS01853-ZF3_153-Control	control_CRISPR	somatic	5_prime_UTR_variant	MODIFIER	ENSSSCG00000040340	ENSSSCG00000040340	snv
	8	58021106	C	G	0.319149	WZS01853-ZF3_153-Control	control_CRISPR	somatic	upstream_gene_variant	MODIFIER	ENSSSCG00000043708	ENSSSCG00000043708	snv
	13	57549934	G	A	0.578947	WZS01853-ZF3_153-Control	control_CRISPR	somatic	intergenic_region	MODIFIER	CHL1-CNTN6	ENSSSCG00000011524-ENSSSCG00000038152	snv
	1	134810373	G	C	0.438596	WZS01853-ZF3_153-Control	control_CRISPR	somatic	intergenic_region	MODIFIER	ENSSSCG00000048307-DPH6	ENSSSCG00000048307-ENSSSCG00000035254	snv
	2	149345925	G	A	0.415385	WZS01853-ZF3_153-Control	control_CRISPR	somatic	downstream_gene_variant	MODIFIER	ENSSSCG00000045153	ENSSSCG00000045153	snv
	2	109239958	T	G	0.634615	WZS01853-ZF3_153-Control	control_CRISPR	somatic	intergenic_region	MODIFIER	ENSSSCG00000047052-ENSSSCG00000045984	ENSSSCG00000047052-ENSSSCG00000045984	snv
	13	92493747	T	C	0.533981	WZS01853-ZF3_153-Control	control_CRISPR	somatic	intron_variant	MODIFIER	MBNL1	ENSSSCG00000011720	snv
	6	71530167	C	A	0.375	WZS01853-ZF3_153-Control	control_CRISPR	somatic	intergenic_region	MODIFIER	ENSSSCG00000043461-DISP3	ENSSSCG00000043461-ENSSSCG00000003417	snv
	1	206301782	T	TG	0.435484	WZS01853-ZF3_153-Control	control_CRISPR	somatic	intron_variant	MODIFIER	BNC2	ENSSSCG00000005180	indel
	14	100829453	T	C	0.519608	WZS01853-ZF3_153-Control	control_CRISPR	somatic	intron_variant	MODIFIER	STAMBPL1	ENSSSCG00000010446	snv
	4	32263570	C	A	0.478723	WZS01853-ZF3_153-Control	control_CRISPR	somatic	intergenic_region	MODIFIER	ENSSSCG00000051273-LRP12	ENSSSCG00000051273-ENSSSCG00000006039	snv
	13	103661048	G	A	0.392523	WZS01853-ZF3_153-Control	control_CRISPR	somatic	intergenic_region	MODIFIER	ENSSSCG00000045945-ENSSSCG00000020451	ENSSSCG00000045945-ENSSSCG00000020451	snv
	8	25571389	G	C	0.522727	WZS01853-ZF3_153-Control	control_CRISPR	somatic	intergenic_region	MODIFIER	PCDH7-ENSSSCG00000008767	ENSSSCG00000008765-ENSSSCG00000008767	snv
	1	43532225	G	C	0.504	WZS01853-ZF3_153-Control	control_CRISPR	somatic	intron_variant	MODIFIER	CEP85L	ENSSSCG00000004249	snv
	1	245712262	T	C	0.504065	WZS01853-ZF3_153-Control	control_CRISPR	somatic	intergenic_region	MODIFIER	ENSSSCG00000045877-ENSSSCG00000044671	ENSSSCG00000045877-ENSSSCG00000044671	snv
	3	35148984	T	TA	0.484848	WZS01853-ZF3_153-Control	control_CRISPR	somatic	intron_variant	MODIFIER	RBFOX1	ENSSSCG00000007917	indel
	6	40776209	C	T	0.495575	WZS01853-ZF3_153-Control	control_CRISPR	somatic	downstream_gene_variant	MODIFIER	ZNF536	ENSSSCG00000029234	snv
	12	51109176	C	A	0.471545	WZS01853-ZF3_153-Control	control_CRISPR	somatic	intergenic_region	MODIFIER	AIPL1-WSCD1	ENSSSCG00000022026-ENSSSCG00000017894	snv
	3	12057124	C	G	0.419847	WZS01853-ZF3_153-Control	control_CRISPR	somatic	intron_variant	MODIFIER	ENSSSCG00000045286	ENSSSCG00000045286	snv
	4	92351722	C	A	0.524272	WZS01853-ZF3_153-Control	control_CRISPR	somatic	intergenic_region	MODIFIER	ENSSSCG00000039068-ENSSSCG00000006455	ENSSSCG00000039068-ENSSSCG00000006455	snv
	13	10703557	A	G	0.553191	WZS01853-ZF3_153-Control	control_CRISPR	somatic	intron_variant	MODIFIER	NKIRAS1	ENSSSCG00000024296	snv
	2	49318225	G	T	0.472222	WZS01853-ZF3_153-Control	control_CRISPR	somatic	intron_variant	MODIFIER	SBF2	ENSSSCG00000013409	snv
	6	107045463	C	T	0.421053	WZS01853-ZF3_153-Control	control_CRISPR	somatic	intergenic_region	MODIFIER	MIB1-ENSSSCG00000042186	ENSSSCG00000025478-ENSSSCG00000042186	snv
	15	49296662	C	T	0.42268	WZS01853-ZF3_153-Control	control_CRISPR	somatic	intergenic_region	MODIFIER	ENSSSCG00000049254-KCNU1	ENSSSCG00000049254-ENSSSCG00000029131	snv
	10	2555350	A	T	0.403226	WZS01853-ZF3_153-Control	control_CRISPR	somatic	intergenic_region	MODIFIER	ENSSSCG00000043005-ENSSSCG00000042899	ENSSSCG00000043005-ENSSSCG00000042899	snv
	11	64439090	T	A	0.452381	WZS01853-ZF3_153-Control	control_CRISPR	somatic	intergenic_region	MODIFIER	ENSSSCG00000026996-ENSSSCG00000009497	ENSSSCG00000026996-ENSSSCG00000009497	snv
	10	47921888	C	A	0.514706	WZS01853-ZF3_153-Control	control_CRISPR	somatic	intron_variant	MODIFIER	FRMD4A	ENSSSCG00000011056	snv
	13	69824913	T	G	0.394161	WZS01853-ZF3_153-Control	control_CRISPR	somatic	intron_variant	MODIFIER	C3orf20	ENSSSCG00000040594	snv
	12	9672940	C	T	0.333333	WZS01853-ZF3_153-Control	control_CRISPR	somatic	intergenic_region	MODIFIER	ENSSSCG00000044587-ENSSSCG00000048915	ENSSSCG00000044587-ENSSSCG00000048915	snv
	13	93160748	C	A	0.196581	WZS01853-ZF3_153-Control	control_CRISPR	somatic	intergenic_region	MODIFIER	ENSSSCG00000043612-ENSSSCG00000049080	ENSSSCG00000043612-ENSSSCG00000049080	snv
	2	75692173	A	G	0.418803	WZS01853-ZF3_153-Control	control_CRISPR	somatic	intergenic_region	MODIFIER	U6-ENSSSCG00000034545	ENSSSCG00000038030-ENSSSCG00000034545	snv
	11	36588821	T	A	0.383178	WZS01853-ZF3_153-Control	control_CRISPR	somatic	intergenic_region	MODIFIER	ENSSSCG00000036413-ENSSSCG00000047184	ENSSSCG00000036413-ENSSSCG00000047184	snv
	17	42118965	C	A	0.436508	WZS01853-ZF3_153-Control	control_CRISPR	somatic	intergenic_region	MODIFIER	DHX35-ENSSSCG00000045493	ENSSSCG00000007352-ENSSSCG00000045493	snv
	13	185058282	G	T	0.564815	WZS01853-ZF3_153-Control	control_CRISPR	somatic	intergenic_region	MODIFIER	U6-NCAM2	ENSSSCG00000018241-ENSSSCG00000012020	snv
	2	119224044	TA	T	0.525	WZS01853-ZF3_153-Control	control_CRISPR	somatic	intergenic_region	MODIFIER	KCNN2-TRIM36	ENSSSCG00000014213-ENSSSCG00000014214	indel
	1	210238880	A	C	0.554217	WZS01853-ZF3_153-Control	control_CRISPR	somatic	intron_variant	MODIFIER	ENSSSCG00000048974	ENSSSCG00000048974	snv
	5	46230150	T	C	0.48	WZS01853-ZF3_153-Control	control_CRISPR	somatic	intergenic_region	MODIFIER	PPFIBP1-SMCO2	ENSSSCG00000000549-ENSSSCG00000000550	snv
	5	70910420	T	G	0.42963	WZS01853-ZF3_153-Control	control_CRISPR	somatic	missense_variant	MODERATE	KIF21A	ENSSSCG00000000779	snv
	9	62521009	G	T	0.56	WZS01853-ZF3_153-Control	control_CRISPR	somatic	intron_variant	MODIFIER	ENSSSCG00000046453	ENSSSCG00000046453	snv
	6	170442353	T	C	0.584615	WZS01853-ZF3_153-Control	control_CRISPR	somatic	intron_variant	MODIFIER	NFYC	ENSSSCG00000003976	snv
	17	59301790	C	A	0.425926	WZS01853-ZF3_153-Control	control_CRISPR	somatic	intron_variant	MODIFIER	ZNF831	ENSSSCG00000007526	snv
	11	1756194	C	A	0.546392	WZS01853-ZF3_153-Control	control_CRISPR	somatic	intergenic_region	MODIFIER	ENSSSCG00000050472-ENSSSCG00000044808	ENSSSCG00000050472-ENSSSCG00000044808	snv
	13	160750609	A	T	0.504854	WZS01853-ZF3_153-Control	control_CRISPR	somatic	intergenic_region	MODIFIER	ENSSSCG00000046262-ENSSSCG00000038050	ENSSSCG00000046262-ENSSSCG00000038050	snv
	16	28692587	T	A	0.471154	WZS01853-ZF3_153-Control	control_CRISPR	somatic	downstream_gene_variant	MODIFIER	FGF10	ENSSSCG00000016878	snv
	14	45526385	A	AAT	0.511111	WZS01853-ZF3_153-Control	control_CRISPR	somatic	intron_variant	MODIFIER	TTC28	ENSSSCG00000009968	indel
	5	100348423	A	G	0.481203	WZS01853-ZF3_153-Control	control_CRISPR	somatic	intron_variant	MODIFIER	ACSS3	ENSSSCG00000000939	snv
	14	78915043	T	G	0.460938	WZS01853-ZF3_153-Control	control_CRISPR	somatic	intron_variant	MODIFIER	LRMDA	ENSSSCG00000034308	snv
	14	106621024	G	T	0.304348	WZS01853-ZF3_153-Control	control_CRISPR	somatic	intron_variant	MODIFIER	CYP2C42	ENSSSCG00000035347	snv
	14	130041039	AT	A	0.47619	WZS01853-ZF3_153-Control	control_CRISPR	somatic	intergenic_region	MODIFIER	SEC23IP-PLPP4	ENSSSCG00000010690-ENSSSCG00000010691	indel
	14	43299535	G	T	0.457143	WZS01853-ZF3_153-Control	control_CRISPR	somatic	intron_variant	MODIFIER	GRK3	ENSSSCG00000009956	snv
	2	19780342	A	G	0.519231	WZS01853-ZF3_153-Control	control_CRISPR	somatic	intergenic_region	MODIFIER	ENSSSCG00000049087-ENSSSCG00000047796	ENSSSCG00000049087-ENSSSCG00000047796	snv
	2	19711367	C	T	0.449612	WZS01853-ZF3_153-Control	control_CRISPR	somatic	downstream_gene_variant	MODIFIER	ENSSSCG00000049087	ENSSSCG00000049087	snv
	7	108795254	C	A	0.390805	WZS01853-ZF3_153-Control	control_CRISPR	somatic	intergenic_region	MODIFIER	ENSSSCG00000043565-ENSSSCG00000046538	ENSSSCG00000043565-ENSSSCG00000046538	snv
	9	108959093	A	T	0.233645	WZS01853-ZF3_153-Control	control_CRISPR	somatic	intron_variant	MODIFIER	AMPH	ENSSSCG00000024136	snv
	15	117903721	A	G	0.467213	WZS01853-ZF3_153-Control	control_CRISPR	somatic	intergenic_region	MODIFIER	FN1-ENSSSCG00000047768	ENSSSCG00000016174-ENSSSCG00000047768	snv
	9	15492290	G	A	0.469565	WZS01853-ZF3_153-Control	control_CRISPR	somatic	intergenic_region	MODIFIER	ENSSSCG00000048266-ENSSSCG00000045408	ENSSSCG00000048266-ENSSSCG00000045408	snv
	1	79149851	G	A	0.510204	WZS01853-ZF3_153-Control	control_CRISPR	somatic	upstream_gene_variant	MODIFIER	ENSSSCG00000049926	ENSSSCG00000049926	snv
	3	89431456	A	C	0.478992	WZS01853-ZF3_153-Control	control_CRISPR	somatic	intergenic_region	MODIFIER	ENSSSCG00000044218-ENSSSCG00000046380	ENSSSCG00000044218-ENSSSCG00000046380	snv
	9	15957550	A	G	0.361905	WZS01853-ZF3_153-Control	control_CRISPR	somatic	intron_variant	MODIFIER	ENSSSCG00000045408	ENSSSCG00000045408	snv
	4	78416449	C	A	0.446154	WZS01853-ZF3_153-Control	control_CRISPR	somatic	intergenic_region	MODIFIER	ENSSSCG00000051470-SNTG1	ENSSSCG00000051470-ENSSSCG00000034495	snv
	13	76567239	G	T	0.212389	WZS01853-ZF3_153-Control	control_CRISPR	somatic	intergenic_region	MODIFIER	EPHB1-ENSSSCG00000043856	ENSSSCG00000024492-ENSSSCG00000043856	snv
	6	133821032	T	C	0.528455	WZS01853-ZF3_153-Control	control_CRISPR	somatic	intergenic_region	MODIFIER	ENSSSCG00000027421-ENSSSCG00000043601	ENSSSCG00000027421-ENSSSCG00000043601	snv
	11	51156572	T	C	0.417476	WZS01853-ZF3_153-Control	control_CRISPR	somatic	intergenic_region	MODIFIER	U6-RBM26	ENSSSCG00000035748-ENSSSCG00000009479	snv
	13	161720275	C	A	0.482353	WZS01853-ZF3_153-Control	control_CRISPR	somatic	upstream_gene_variant	MODIFIER	ENSSSCG00000037688	ENSSSCG00000037688	snv
	13	28470359	A	G	0.463415	WZS01853-ZF3_153-Control	control_CRISPR	somatic	intron_variant	MODIFIER	ENSSSCG00000051460	ENSSSCG00000051460	snv
	2	138505259	G	T	0.465116	WZS01853-ZF3_153-Control	control_CRISPR	somatic	upstream_gene_variant	MODIFIER	TRPC7	ENSSSCG00000014318	snv
	8	20113233	A	G	0.574627	WZS01853-ZF3_153-Control	control_CRISPR	somatic	intron_variant	MODIFIER	RBPJ	ENSSSCG00000022155	snv
	6	132921924	G	T	0.232143	WZS01853-ZF3_153-Control	control_CRISPR	somatic	intergenic_region	MODIFIER	U1-ENSSSCG00000027421	ENSSSCG00000050555-ENSSSCG00000027421	snv
	3	36338640	A	C	0.53913	WZS01853-ZF3_153-Control	control_CRISPR	somatic	intron_variant	MODIFIER	RBFOX1	ENSSSCG00000007917	snv
	13	58054376	G	T	0.491667	WZS01853-ZF3_153-Control	control_CRISPR	somatic	intergenic_region	MODIFIER	CNTN6-ENSSSCG00000048689	ENSSSCG00000038152-ENSSSCG00000048689	snv
	5	11847633	C	T	0.50303	WZS01853-ZF3_153-Control	control_CRISPR	somatic	intron_variant	MODIFIER	RBFOX2	ENSSSCG00000000152	snv
	9	66823327	G	A	0.566667	WZS01853-ZF3_153-Control	control_CRISPR	somatic	downstream_gene_variant	MODIFIER	ENSSSCG00000039370	ENSSSCG00000039370	snv
	13	123644534	A	G	0.448276	WZS01853-ZF3_153-Control	control_CRISPR	somatic	intron_variant	MODIFIER	IGF2BP2	ENSSSCG00000011795	snv
	10	55967167	G	T	0.196078	WZS01853-ZF3_153-Control	control_CRISPR	somatic	intron_variant	MODIFIER	ENSSSCG00000032896	ENSSSCG00000032896	snv
	14	116688189	A	G	0.293103	WZS01853-ZF3_153-Control	control_CRISPR	somatic	intergenic_region	MODIFIER	U8-U6	ENSSSCG00000018956-ENSSSCG00000020604	snv
	9	51740047	T	C	0.252525	WZS01853-ZF3_153-Control	control_CRISPR	somatic	intron_variant	MODIFIER	ENSSSCG00000015193	ENSSSCG00000015193	snv
	8	90854863	T	C	0.558333	WZS01853-ZF3_153-Control	control_CRISPR	somatic	intron_variant	MODIFIER	ENSSSCG00000050034	ENSSSCG00000050034	snv
	10	69023215	G	A	0.393617	WZS01853-ZF3_153-Control	control_CRISPR	somatic	intron_variant	MODIFIER	DIP2C	ENSSSCG00000011163	snv
	13	107222327	T	C	0.342857	WZS01853-ZF3_153-Control	control_CRISPR	somatic	intergenic_region	MODIFIER	GOLIM4-ENSSSCG00000035525	ENSSSCG00000011741-ENSSSCG00000035525	snv
	5	13712539	T	A	0.401639	WZS01853-ZF3_153-Control	control_CRISPR	somatic	intron_variant	MODIFIER	POLR3B	ENSSSCG00000000169	snv
	15	36589117	GA	G	0.564103	WZS01853-ZF3_153-Control	control_CRISPR	somatic	intergenic_region	MODIFIER	U6-ENSSSCG00000048823	ENSSSCG00000023144-ENSSSCG00000048823	indel
	9	103879701	C	A	0.533333	WZS01853-ZF3_153-Control	control_CRISPR	somatic	intron_variant	MODIFIER	RELN	ENSSSCG00000015426	snv
	1	235979843	C	A	0.444444	WZS01853-ZF3_153-Control	control_CRISPR	somatic	intron_variant	MODIFIER	ENSSSCG00000005305	ENSSSCG00000005305	snv
	13	193337429	GA	G	0.463415	WZS01853-ZF3_153-Control	control_CRISPR	somatic	intergenic_region	MODIFIER	GRIK1-CLDN17	ENSSSCG00000025119-ENSSSCG00000012031	indel
	13	177155800	A	C	0.514925	WZS01853-ZF3_153-Control	control_CRISPR	somatic	intergenic_region	MODIFIER	ENSSSCG00000045314-ENSSSCG00000049695	ENSSSCG00000045314-ENSSSCG00000049695	snv
	6	134051087	A	G	0.483516	WZS01853-ZF3_153-Control	control_CRISPR	somatic	intergenic_region	MODIFIER	ENSSSCG00000043601-SNORA70	ENSSSCG00000043601-ENSSSCG00000034573	snv
	8	87061410	C	A	0.458647	WZS01853-ZF3_153-Control	control_CRISPR	somatic	intron_variant	MODIFIER	MAML3	ENSSSCG00000009060	snv
	3	75765805	G	A	0.330189	WZS01853-ZF3_153-Control	control_CRISPR	somatic	intergenic_region	MODIFIER	ENSSSCG00000050017-ENSSSCG00000045305	ENSSSCG00000050017-ENSSSCG00000045305	snv
	16	14324480	C	A	0.466667	WZS01853-ZF3_153-Control	control_CRISPR	somatic	intergenic_region	MODIFIER	CDH9-ENSSSCG00000041821	ENSSSCG00000020845-ENSSSCG00000041821	snv
	11	41969865	G	A	0.412698	WZS01853-ZF3_153-Control	control_CRISPR	somatic	intergenic_region	MODIFIER	ENSSSCG00000041007-KLHL1	ENSSSCG00000041007-ENSSSCG00000009456	snv
	15	75508037	T	A	0.45045	WZS01853-ZF3_153-Control	control_CRISPR	somatic	intron_variant	MODIFIER	DHRS9	ENSSSCG00000015930	snv
	2	149819948	T	C	0.568627	WZS01853-ZF3_153-Control	control_CRISPR	somatic	intron_variant	MODIFIER	HTR4	ENSSSCG00000014428	snv
	9	16536608	T	G	0.445783	WZS01853-ZF3_153-Control	control_CRISPR	somatic	intergenic_region	MODIFIER	ENSSSCG00000047708-U2	ENSSSCG00000047708-ENSSSCG00000024491	snv
	5	37001524	C	A	0.56701	WZS01853-ZF3_153-Control	control_CRISPR	somatic	intergenic_region	MODIFIER	U4-ENSSSCG00000044906	ENSSSCG00000044578-ENSSSCG00000044906	snv
	15	121485681	A	C	0.495495	WZS01853-ZF3_153-Control	control_CRISPR	somatic	intergenic_region	MODIFIER	ENSSSCG00000032522-SPEGNB	ENSSSCG00000032522-ENSSSCG00000032289	snv
	9	99779291	T	C	0.531469	WZS01853-ZF3_153-Control	control_CRISPR	somatic	intron_variant	MODIFIER	CD36	ENSSSCG00000015405	snv
	13	187744357	T	A	0.457831	WZS01853-ZF3_153-Control	control_CRISPR	somatic	intergenic_region	MODIFIER	ENSSSCG00000047308-ENSSSCG00000050420	ENSSSCG00000047308-ENSSSCG00000050420	snv
	7	107225589	T	G	0.607477	WZS01853-ZF3_153-Control	control_CRISPR	somatic	intergenic_region	MODIFIER	ENSSSCG00000044398-ENSSSCG00000042895	ENSSSCG00000044398-ENSSSCG00000042895	snv
	1	225723348	G	C	0.580247	WZS01853-ZF3_153-Control	control_CRISPR	somatic	intron_variant	MODIFIER	TMC1	ENSSSCG00000005266	snv
	6	30678053	G	A	0.466216	WZS01853-ZF3_153-Control	control_CRISPR	somatic	intergenic_region	MODIFIER	ENSSSCG00000047270-ENSSSCG00000041426	ENSSSCG00000047270-ENSSSCG00000041426	snv
	7	2813328	C	T	0.479592	WZS01853-ZF3_153-Control	control_CRISPR	somatic	intron_variant	MODIFIER	CDYL	ENSSSCG00000000999	snv
	1	92651079	A	G	0.393443	WZS01853-ZF3_153-Control	control_CRISPR	somatic	intergenic_region	MODIFIER	ENSSSCG00000049718-ENSSSCG00000033160	ENSSSCG00000049718-ENSSSCG00000033160	snv
	9	129551959	C	A	0.504505	WZS01853-ZF3_153-Control	control_CRISPR	somatic	intron_variant	MODIFIER	PROX1	ENSSSCG00000015584	snv
	14	87081443	G	C	0.51	WZS01853-ZF3_153-Control	control_CRISPR	somatic	intron_variant	MODIFIER	GRID1	ENSSSCG00000010352	snv
	15	68110959	A	G	0.551402	WZS01853-ZF3_153-Control	control_CRISPR	somatic	upstream_gene_variant	MODIFIER	ENSSSCG00000034567	ENSSSCG00000034567	snv
	13	20209248	AT	A	0.443038	WZS01853-ZF3_153-Control	control_CRISPR	somatic	intron_variant	MODIFIER	ENSSSCG00000044082	ENSSSCG00000044082	indel
	14	61889000	C	T	0.490741	WZS01853-ZF3_153-Control	control_CRISPR	somatic	intron_variant	MODIFIER	BICC1	ENSSSCG00000010204	snv
	1	192111654	T	A	0.493151	WZS01853-ZF3_153-Control	control_CRISPR	somatic	intergenic_region	MODIFIER	ENSSSCG00000044241-ENSSSCG00000050818	ENSSSCG00000044241-ENSSSCG00000050818	snv
	1	192132129	A	T	0.521739	WZS01853-ZF3_153-Control	control_CRISPR	somatic	intergenic_region	MODIFIER	ENSSSCG00000044241-ENSSSCG00000050818	ENSSSCG00000044241-ENSSSCG00000050818	snv
	1	194726516	C	T	0.5	WZS01853-ZF3_153-Control	control_CRISPR	somatic	upstream_gene_variant	MODIFIER	GPHB5	ENSSSCG00000005116	snv
	5	70091757	G	A	0.444444	WZS01853-ZF3_153-Control	control_CRISPR	somatic	intron_variant	MODIFIER	MICAL3	ENSSSCG00000000770	snv
	15	132000891	GC	G	0.425926	WZS01853-ZF3_153-Control	control_CRISPR	somatic	intron_variant	MODIFIER	ARMC9	ENSSSCG00000023994	indel
	8	63937378	A	G	0.58427	WZS01853-ZF3_153-Control	control_CRISPR	somatic	intergenic_region	MODIFIER	EPHA5-ENSSSCG00000049899	ENSSSCG00000008919-ENSSSCG00000049899	snv
	2	43770008	G	A	0.569231	WZS01853-ZF3_153-Control	control_CRISPR	somatic	intergenic_region	MODIFIER	ENSSSCG00000043915-INSC	ENSSSCG00000043915-ENSSSCG00000013385	snv
	1	88215966	G	T	0.494949	WZS01853-ZF3_153-Control	control_CRISPR	somatic	intron_variant	MODIFIER	MEI4	ENSSSCG00000034152	snv
	5	20419652	C	T	0.387755	WZS01853-ZF3_153-Control	control_CRISPR	somatic	upstream_gene_variant	MODIFIER	ENSSSCG00000049837	ENSSSCG00000049837	snv
	7	49106248	G	A	0.473118	WZS01853-ZF3_153-Control	control_CRISPR	somatic	downstream_gene_variant	MODIFIER	FAH	ENSSSCG00000001780	snv
	7	82214147	C	G	0.393939	WZS01853-ZF3_153-Control	control_CRISPR	somatic	intron_variant	MODIFIER	ENSSSCG00000048658	ENSSSCG00000048658	snv
	6	23406642	A	T	0.630631	WZS01853-ZF3_153-Control	control_CRISPR	somatic	intergenic_region	MODIFIER	ENSSSCG00000046667-ENSSSCG00000047100	ENSSSCG00000046667-ENSSSCG00000047100	snv
	7	121488336	G	A	0.398148	WZS01853-ZF3_153-Control	control_CRISPR	somatic	intergenic_region	MODIFIER	BEGAIN-DLK1	ENSSSCG00000036589-ENSSSCG00000035805	snv
	9	135153665	T	A	0.0769231	WZS01853-ZF3_153-Control	control_CRISPR	somatic	downstream_gene_variant	MODIFIER	ENSSSCG00000045693	ENSSSCG00000045693	snv
	6	63868697	G	T	0.576087	WZS01853-ZF3_153-Control	control_CRISPR	somatic	missense_variant	MODERATE	GNB1	ENSSSCG00000021890	snv
	2	68031680	G	A	0.43609	WZS01853-ZF3_153-Control	control_CRISPR	somatic	intergenic_region	MODIFIER	ENSSSCG00000033360-ENSSSCG00000041662	ENSSSCG00000033360-ENSSSCG00000041662	snv
	5	10151008	C	T	0.211538	WZS01853-ZF3_153-Control	control_CRISPR	somatic	intron_variant	MODIFIER	LGALS1	ENSSSCG00000033854	snv
	16	64479692	C	T	0.504762	WZS01853-ZF3_153-Control	control_CRISPR	somatic	intron_variant	MODIFIER	EBF1	ENSSSCG00000017046	snv
	8	26677689	C	T	0.539823	WZS01853-ZF3_153-Control	control_CRISPR	somatic	intergenic_region	MODIFIER	PCDH7-ENSSSCG00000008767	ENSSSCG00000008765-ENSSSCG00000008767	snv
	14	23127319	G	T	0.571429	WZS01853-ZF3_153-Control	control_CRISPR	somatic	intron_variant	MODIFIER	GALNT9	ENSSSCG00000009738	snv
	1	82227110	G	A	0.572581	WZS01853-ZF3_153-Control	control_CRISPR	somatic	intron_variant	MODIFIER	ENSSSCG00000025656	ENSSSCG00000025656	snv
	18	41911338	C	A	0.483333	WZS01853-ZF3_153-Control	control_CRISPR	somatic	intergenic_region	MODIFIER	ENSSSCG00000044349-ADCYAP1R1	ENSSSCG00000044349-ENSSSCG00000016672	snv
	2	111445808	C	A	0.478632	WZS01853-ZF3_153-Control	control_CRISPR	somatic	intergenic_region	MODIFIER	ENSSSCG00000051043-ENSSSCG00000046482	ENSSSCG00000051043-ENSSSCG00000046482	snv
	3	5561112	G	A	0.0631579	WZS01853-ZF3_153-Control	control_CRISPR	somatic	intron_variant	MODIFIER	BAIAP2L1	ENSSSCG00000007602	snv
	11	15760002	C	A	0.452991	WZS01853-ZF3_153-Control	control_CRISPR	somatic	intron_variant	MODIFIER	CKAP2	ENSSSCG00000009378	snv
	1	176663945	A	T	0.482143	WZS01853-ZF3_153-Control	control_CRISPR	somatic	intergenic_region	MODIFIER	RPL10L-MDGA2	ENSSSCG00000005001-ENSSSCG00000005002	snv
	5	38688061	G	GA	0.410714	WZS01853-ZF3_153-Control	control_CRISPR	somatic	intron_variant	MODIFIER	GLIPR1L2	ENSSSCG00000025915	indel
	1	218038869	A	T	0.503704	WZS01853-ZF3_153-Control	control_CRISPR	somatic	intron_variant	MODIFIER	GLIS3	ENSSSCG00000005224	snv
	3	98869172	G	T	0.48855	WZS01853-ZF3_153-Control	control_CRISPR	somatic	intergenic_region	MODIFIER	ENSSSCG00000045166-ENSSSCG00000046007	ENSSSCG00000045166-ENSSSCG00000046007	snv
	10	11810067	G	A	0.448598	WZS01853-ZF3_153-Control	control_CRISPR	somatic	intron_variant	MODIFIER	ENSSSCG00000034164	ENSSSCG00000034164	snv
	6	126963425	A	C	0.488636	WZS01853-ZF3_153-Control	control_CRISPR	somatic	intergenic_region	MODIFIER	ENSSSCG00000037233-SYT4	ENSSSCG00000037233-ENSSSCG00000037079	snv
	15	98754388	CAT	C	0.5	WZS01853-ZF3_153-Control	control_CRISPR	somatic	intergenic_region	MODIFIER	ENSSSCG00000046893-ENSSSCG00000043415	ENSSSCG00000046893-ENSSSCG00000043415	indel
	14	3333574	T	G	0.576	WZS01853-ZF3_153-Control	control_CRISPR	somatic	intron_variant	MODIFIER	ENSSSCG00000033204	ENSSSCG00000033204	snv
	2	35189991	G	T	0.412844	WZS01853-ZF3_153-Control	control_CRISPR	somatic	intron_variant	MODIFIER	LUZP2	ENSSSCG00000013341	snv
	13	167491652	C	A	0.579545	WZS01853-ZF3_153-Control	control_CRISPR	somatic	intergenic_region	MODIFIER	CSNKA2IP-C3orf38	ENSSSCG00000011995-ENSSSCG00000034645	snv
	15	124594832	C	G	0.503597	WZS01853-ZF3_153-Control	control_CRISPR	somatic	5_prime_UTR_variant	MODIFIER	ACSL3	ENSSSCG00000016223	snv
	18	3363972	G	C	0.48	WZS01853-ZF3_153-Control	control_CRISPR	somatic	intron_variant	MODIFIER	DPP6	ENSSSCG00000016423	snv
	5	3222506	T	C	0.333333	WZS01853-ZF3_153-Control	control_CRISPR	somatic	intron_variant	MODIFIER	TRMU	ENSSSCG00000000007	snv
	14	26686572	G	A	0.521368	WZS01853-ZF3_153-Control	control_CRISPR	somatic	intergenic_region	MODIFIER	ENSSSCG00000040330-ENSSSCG00000045739	ENSSSCG00000040330-ENSSSCG00000045739	snv
	9	3587239	T	G	0.485437	WZS01853-ZF3_153-Control	control_CRISPR	somatic	upstream_gene_variant	MODIFIER	ENSSSCG00000047710	ENSSSCG00000047710	snv
	6	151558877	G	T	0.408163	WZS01853-ZF3_153-Control	control_CRISPR	somatic	intergenic_region	MODIFIER	NFIA-ENSSSCG00000050509	ENSSSCG00000023243-ENSSSCG00000050509	snv
	9	23431457	G	A	0.555556	WZS01853-ZF3_153-Control	control_CRISPR	somatic	intergenic_region	MODIFIER	ENSSSCG00000042674-ENSSSCG00000045812	ENSSSCG00000042674-ENSSSCG00000045812	snv
	4	126095565	C	A	0.51	WZS01853-ZF3_153-Control	control_CRISPR	somatic	intergenic_region	MODIFIER	U6-ENSSSCG00000043214	ENSSSCG00000023240-ENSSSCG00000043214	snv
	14	121636268	G	T	0.430894	WZS01853-ZF3_153-Control	control_CRISPR	somatic	intergenic_region	MODIFIER	ADRA2A-ENSSSCG00000045636	ENSSSCG00000010629-ENSSSCG00000045636	snv
	2	93785836	C	A	0.435185	WZS01853-ZF3_153-Control	control_CRISPR	somatic	intergenic_region	MODIFIER	EDIL3-COX7C	ENSSSCG00000026780-ENSSSCG00000040325	snv
	1	65327996	T	C	0.29771	WZS01853-ZF3_153-Control	control_CRISPR	somatic	upstream_gene_variant	MODIFIER	ENSSSCG00000044402	ENSSSCG00000044402	snv
	13	178195566	TG	T	0.56	WZS01853-ZF3_153-Control	control_CRISPR	somatic	intron_variant	MODIFIER	ROBO2	ENSSSCG00000012002	indel
	6	32489074	A	G	0.477064	WZS01853-ZF3_153-Control	control_CRISPR	somatic	intergenic_region	MODIFIER	ENSSSCG00000049382-TOX3	ENSSSCG00000049382-ENSSSCG00000002835	snv
	10	61669481	G	A	0.410853	WZS01853-ZF3_153-Control	control_CRISPR	somatic	intergenic_region	MODIFIER	ENSSSCG00000050690-ENSSSCG00000044053	ENSSSCG00000050690-ENSSSCG00000044053	snv
	18	1408092	C	T	0.381818	WZS01853-ZF3_153-Control	control_CRISPR	somatic	intergenic_region	MODIFIER	PTPRN2-DNAJB6	ENSSSCG00000026661-ENSSSCG00000033272	snv
	10	22801808	T	G	0.458824	WZS01853-ZF3_153-Control	control_CRISPR	somatic	intron_variant	MODIFIER	NR5A2	ENSSSCG00000024975	snv
	2	23881941	G	T	0.495146	WZS01853-ZF3_153-Control	control_CRISPR	somatic	intergenic_region	MODIFIER	ENSSSCG00000050877-ENSSSCG00000045070	ENSSSCG00000050877-ENSSSCG00000045070	snv
	1	156942403	A	G	0.517241	WZS01853-ZF3_153-Control	control_CRISPR	somatic	intergenic_region	MODIFIER	ENSSSCG00000045840-ENSSSCG00000041887	ENSSSCG00000045840-ENSSSCG00000041887	snv
	1	69766711	A	T	0.316832	WZS01853-ZF3_153-Control	control_CRISPR	somatic	intergenic_region	MODIFIER	GRIK2-ENSSSCG00000046266	ENSSSCG00000004361-ENSSSCG00000046266	snv
	14	92942195	CT	C	0.653333	WZS01853-ZF3_153-Control	control_CRISPR	somatic	intergenic_region	MODIFIER	ENSSSCG00000046973-ENSSSCG00000044916	ENSSSCG00000046973-ENSSSCG00000044916	indel
	8	124003867	C	A	0.4	WZS01853-ZF3_153-Control	control_CRISPR	somatic	intergenic_region	MODIFIER	ENSSSCG00000046219-UNC5C	ENSSSCG00000046219-ENSSSCG00000021874	snv
	14	25574243	A	C	0.538462	WZS01853-ZF3_153-Control	control_CRISPR	somatic	intron_variant	MODIFIER	TMEM132D	ENSSSCG00000038915	snv
	18	30454772	A	G	0.264368	WZS01853-ZF3_153-Control	control_CRISPR	somatic	intergenic_region	MODIFIER	U6-ENSSSCG00000047179	ENSSSCG00000018780-ENSSSCG00000047179	snv
	1	31770727	A	AT	0.462366	WZS01853-ZF3_153-Control	control_CRISPR	somatic	intron_variant	MODIFIER	ENPP1	ENSSSCG00000004193	indel
	9	118483165	A	T	0.462121	WZS01853-ZF3_153-Control	control_CRISPR	somatic	intron_variant	MODIFIER	PAPPA2	ENSSSCG00000015512	snv
	1	172195984	T	G	0.548673	WZS01853-ZF3_153-Control	control_CRISPR	somatic	intergenic_region	MODIFIER	LRFN5-ENSSSCG00000041306	ENSSSCG00000004990-ENSSSCG00000041306	snv
	10	1026153	C	A	0.216667	WZS01853-ZF3_153-Control	control_CRISPR	somatic	intergenic_region	MODIFIER	ENSSSCG00000043217-ENSSSCG00000049879	ENSSSCG00000043217-ENSSSCG00000049879	snv
	4	122276221	T	C	0.655914	WZS01853-ZF3_153-Control	control_CRISPR	somatic	intron_variant	MODIFIER	TLCD4	ENSSSCG00000039854	snv
	1	73852476	C	A	0.58	WZS01853-ZF3_153-Control	control_CRISPR	somatic	intron_variant	MODIFIER	SCML4	ENSSSCG00000033392	snv
	7	104829923	C	T	0.586538	WZS01853-ZF3_153-Control	control_CRISPR	somatic	intergenic_region	MODIFIER	ENSSSCG00000049060-ENSSSCG00000047447	ENSSSCG00000049060-ENSSSCG00000047447	snv
	3	56037740	G	T	0.495726	WZS01853-ZF3_153-Control	control_CRISPR	somatic	intron_variant	MODIFIER	VWA3B	ENSSSCG00000033394	snv
	17	51205448	G	C	0.647727	WZS01853-ZF3_153-Control	control_CRISPR	somatic	intergenic_region	MODIFIER	PTGIS-ENSSSCG00000007464	ENSSSCG00000007463-ENSSSCG00000007464	snv
	8	73106277	G	C	0.598131	WZS01853-ZF3_153-Control	control_CRISPR	somatic	intergenic_region	MODIFIER	ENSSSCG00000049617-CNOT6L	ENSSSCG00000049617-ENSSSCG00000008989	snv
	1	203991415	G	T	0.473282	WZS01853-ZF3_153-Control	control_CRISPR	somatic	intron_variant	MODIFIER	ADAMTSL1	ENSSSCG00000040366	snv
	10	6150180	G	T	0.585859	WZS01853-ZF3_153-Control	control_CRISPR	somatic	intergenic_region	MODIFIER	KCTD3-ENSSSCG00000038066	ENSSSCG00000010811-ENSSSCG00000038066	snv
	15	95858863	G	T	0.291045	WZS01853-ZF3_153-Control	control_CRISPR	somatic	intergenic_region	MODIFIER	U6-MYO1B	ENSSSCG00000034205-ENSSSCG00000016061	snv
	13	40442939	G	C	0.538462	WZS01853-ZF3_153-Control	control_CRISPR	somatic	upstream_gene_variant	MODIFIER	ENSSSCG00000042038	ENSSSCG00000042038	snv
	17	42830305	T	A	0.417323	WZS01853-ZF3_153-Control	control_CRISPR	somatic	intergenic_region	MODIFIER	ENSSSCG00000051582-ENSSSCG00000048705	ENSSSCG00000051582-ENSSSCG00000048705	snv
	6	138663386	CT	C	0.509434	WZS01853-ZF3_153-Control	control_CRISPR	somatic	intron_variant	MODIFIER	ENSSSCG00000040109	ENSSSCG00000040109	indel
	6	125225926	G	A	0.462963	WZS01853-ZF3_153-Control	control_CRISPR	somatic	intergenic_region	MODIFIER	ENSSSCG00000042285-ENSSSCG00000038382	ENSSSCG00000042285-ENSSSCG00000038382	snv
	1	257790498	C	T	0.496063	WZS01853-ZF3_153-Control	control_CRISPR	somatic	intergenic_region	MODIFIER	ASTN2-TLR4	ENSSSCG00000005502-ENSSSCG00000005503	snv
	8	10016700	C	A	0.495652	WZS01853-ZF3_153-Control	control_CRISPR	somatic	intron_variant	MODIFIER	ENSSSCG00000047882	ENSSSCG00000047882	snv
	8	35579145	A	T	0.52381	WZS01853-ZF3_153-Control	control_CRISPR	somatic	intergenic_region	MODIFIER	U6-ENSSSCG00000042027	ENSSSCG00000029103-ENSSSCG00000042027	snv
	14	121825332	T	G	0.559322	WZS01853-ZF3_153-Control	control_CRISPR	somatic	intron_variant	MODIFIER	ENSSSCG00000042781	ENSSSCG00000042781	snv
	15	71014216	C	A	0.475806	WZS01853-ZF3_153-Control	control_CRISPR	somatic	intergenic_region	MODIFIER	ENSSSCG00000050090-GRB14	ENSSSCG00000050090-ENSSSCG00000015901	snv
	4	11360097	T	A	0.504132	WZS01853-ZF3_153-Control	control_CRISPR	somatic	intergenic_region	MODIFIER	ENSSSCG00000047619-ENSSSCG00000045199	ENSSSCG00000047619-ENSSSCG00000045199	snv
	13	102462304	G	C	0.346154	WZS01853-ZF3_153-Control	control_CRISPR	somatic	intergenic_region	MODIFIER	ENSSSCG00000045945-ENSSSCG00000020451	ENSSSCG00000045945-ENSSSCG00000020451	snv
	1	227224398	C	A	0.226415	WZS01853-ZF3_153-Control	control_CRISPR	somatic	intergenic_region	MODIFIER	ANXA1-RORB	ENSSSCG00000005267-ENSSSCG00000005268	snv
	8	73929800	C	T	0.507042	WZS01853-ZF3_153-Control	control_CRISPR	somatic	intron_variant	MODIFIER	FRAS1	ENSSSCG00000008991	snv
	14	70518757	C	CA	0.417391	WZS01853-ZF3_153-Control	control_CRISPR	somatic	intron_variant	MODIFIER	CTNNA3	ENSSSCG00000036480	indel
	11	53205282	T	A	0.520408	WZS01853-ZF3_153-Control	control_CRISPR	somatic	intergenic_region	MODIFIER	ENSSSCG00000045873-ENSSSCG00000004054	ENSSSCG00000045873-ENSSSCG00000004054	snv
	7	101018281	C	T	0.510791	WZS01853-ZF3_153-Control	control_CRISPR	somatic	intergenic_region	MODIFIER	ADCK1-ENSSSCG00000045007	ENSSSCG00000002408-ENSSSCG00000045007	snv
	9	117699544	C	A	0.194915	WZS01853-ZF3_153-Control	control_CRISPR	somatic	intron_variant	MODIFIER	TNR	ENSSSCG00000015508	snv
	6	107726297	C	T	0.517857	WZS01853-ZF3_153-Control	control_CRISPR	somatic	intergenic_region	MODIFIER	ENSSSCG00000031330-ENSSSCG00000003704	ENSSSCG00000031330-ENSSSCG00000003704	snv
	13	188889101	T	TA	0.47561	WZS01853-ZF3_153-Control	control_CRISPR	somatic	intergenic_region	MODIFIER	ENSSSCG00000043493-ENSSSCG00000050182	ENSSSCG00000043493-ENSSSCG00000050182	indel
	4	58610396	T	A	0.51087	WZS01853-ZF3_153-Control	control_CRISPR	somatic	intergenic_region	MODIFIER	U6-ENSSSCG00000033751	ENSSSCG00000031935-ENSSSCG00000033751	snv
	6	133441822	C	A	0.336735	WZS01853-ZF3_153-Control	control_CRISPR	somatic	intergenic_region	MODIFIER	U1-ENSSSCG00000027421	ENSSSCG00000050555-ENSSSCG00000027421	snv
	13	170842845	A	G	0.458904	WZS01853-ZF3_153-Control	control_CRISPR	somatic	intergenic_region	MODIFIER	CADM2-ENSSSCG00000049210	ENSSSCG00000011999-ENSSSCG00000049210	snv
	7	8441428	C	A	0.530864	WZS01853-ZF3_153-Control	control_CRISPR	somatic	non_coding_transcript_exon_variant	MODIFIER	ENSSSCG00000047036	ENSSSCG00000047036	snv
	5	74708635	C	A	0.465347	WZS01853-ZF3_153-Control	control_CRISPR	somatic	intergenic_region	MODIFIER	ADAMTS20-PUS7L	ENSSSCG00000000795-ENSSSCG00000000800	snv
	3	56523081	G	A	0.431034	WZS01853-ZF3_153-Control	control_CRISPR	somatic	3_prime_UTR_variant	MODIFIER	ZAP70	ENSSSCG00000008193	snv
	13	98217768	G	T	0.422222	WZS01853-ZF3_153-Control	control_CRISPR	somatic	intron_variant	MODIFIER	RSRC1	ENSSSCG00000027556	snv
	13	106090762	T	C	0.474747	WZS01853-ZF3_153-Control	control_CRISPR	somatic	intergenic_region	MODIFIER	ENSSSCG00000033350-ZBBX	ENSSSCG00000033350-ENSSSCG00000023393	snv
	8	126158960	T	C	0.39604	WZS01853-ZF3_153-Control	control_CRISPR	somatic	intron_variant	MODIFIER	GRID2	ENSSSCG00000009197	snv
	7	25450316	G	T	0.57377	WZS01853-ZF3_153-Control	control_CRISPR	somatic	intron_variant	MODIFIER	BMP5	ENSSSCG00000001478	snv
	14	40359526	A	AAGAT	0.482759	WZS01853-ZF3_153-Control	control_CRISPR	somatic	upstream_gene_variant	MODIFIER	MSI1	ENSSSCG00000029365	indel
	17	20377559	C	T	0.542857	WZS01853-ZF3_153-Control	control_CRISPR	somatic	intergenic_region	MODIFIER	ENSSSCG00000045897-ENSSSCG00000050749	ENSSSCG00000045897-ENSSSCG00000050749	snv
	9	101172332	AT	A	0.464646	WZS01853-ZF3_153-Control	control_CRISPR	somatic	intron_variant	MODIFIER	MAGI2	ENSSSCG00000031780	indel
	13	152767910	C	A	0.491228	WZS01853-ZF3_153-Control	control_CRISPR	somatic	intergenic_region	MODIFIER	ENSSSCG00000039990-ENSSSCG00000042450	ENSSSCG00000039990-ENSSSCG00000042450	snv
	1	8530134	C	CT	0.542857	WZS01853-ZF3_153-Control	control_CRISPR	somatic	intron_variant	MODIFIER	SYTL3	ENSSSCG00000004057	indel
	7	50321583	T	G	0.454545	WZS01853-ZF3_153-Control	control_CRISPR	somatic	intergenic_region	MODIFIER	TMC3-ENSSSCG00000044046	ENSSSCG00000001789-ENSSSCG00000044046	snv
	6	9774403	G	T	0.441176	WZS01853-ZF3_153-Control	control_CRISPR	somatic	intron_variant	MODIFIER	WWOX	ENSSSCG00000027415	snv
	8	50752131	C	A	0.529412	WZS01853-ZF3_153-Control	control_CRISPR	somatic	intron_variant	MODIFIER	FSTL5	ENSSSCG00000027183	snv
	13	10048324	T	G	0.451613	WZS01853-ZF3_153-Control	control_CRISPR	somatic	intron_variant	MODIFIER	UBE2E2	ENSSSCG00000031392	snv
	13	161547031	T	G	0.611111	WZS01853-ZF3_153-Control	control_CRISPR	somatic	intergenic_region	MODIFIER	ENSSSCG00000033060-ENSSSCG00000042545	ENSSSCG00000033060-ENSSSCG00000042545	snv
	8	129609012	A	G	0.552381	WZS01853-ZF3_153-Control	control_CRISPR	somatic	intergenic_region	MODIFIER	SNCA-ENSSSCG00000043431	ENSSSCG00000009203-ENSSSCG00000043431	snv
	1	135242566	A	G	0.43956	WZS01853-ZF3_153-Control	control_CRISPR	somatic	intergenic_region	MODIFIER	ENSSSCG00000048307-DPH6	ENSSSCG00000048307-ENSSSCG00000035254	snv
	4	8651090	C	A	0.391304	WZS01853-ZF3_153-Control	control_CRISPR	somatic	upstream_gene_variant	MODIFIER	ENSSSCG00000048969	ENSSSCG00000048969	snv
	8	59336145	T	C	0.429907	WZS01853-ZF3_153-Control	control_CRISPR	somatic	intergenic_region	MODIFIER	ENSSSCG00000046730-ENSSSCG00000046907	ENSSSCG00000046730-ENSSSCG00000046907	snv
	9	63131345	T	G	0.519608	WZS01853-ZF3_153-Control	control_CRISPR	somatic	intergenic_region	MODIFIER	ENSSSCG00000046596-MROH9	ENSSSCG00000046596-ENSSSCG00000026160	snv
	13	159650929	A	T	0.507692	WZS01853-ZF3_153-Control	control_CRISPR	somatic	intron_variant	MODIFIER	ENSSSCG00000039367	ENSSSCG00000039367	snv
	8	100404874	A	G	0.52	WZS01853-ZF3_153-Control	control_CRISPR	somatic	intergenic_region	MODIFIER	ENSSSCG00000046065-SPRY1	ENSSSCG00000046065-ENSSSCG00000009083	snv
	14	40533659	A	C	0.565574	WZS01853-ZF3_153-Control	control_CRISPR	somatic	intergenic_region	MODIFIER	POP5-ENSSSCG00000009914	ENSSSCG00000009912-ENSSSCG00000009914	snv
	10	24656329	AG	A	0.447368	WZS01853-ZF3_153-Control	control_CRISPR	somatic	intron_variant	MODIFIER	SYT2	ENSSSCG00000010926	indel
	15	40378096	C	CTT	0.590909	WZS01853-ZF3_153-Control	control_CRISPR	somatic	intergenic_region	MODIFIER	ENSSSCG00000049401-ENSSSCG00000045939	ENSSSCG00000049401-ENSSSCG00000045939	indel
	12	60272727	A	G	0.483871	WZS01853-ZF3_153-Control	control_CRISPR	somatic	intron_variant	MODIFIER	ENSSSCG00000018050	ENSSSCG00000018050	snv
	2	2884317	G	C	0.461538	WZS01853-ZF3_153-Control	control_CRISPR	somatic	intron_variant	MODIFIER	SHANK2	ENSSSCG00000033043	snv
	6	140049563	C	A	0.510791	WZS01853-ZF3_153-Control	control_CRISPR	somatic	intergenic_region	MODIFIER	ENSSSCG00000050694-ENSSSCG00000032901	ENSSSCG00000050694-ENSSSCG00000032901	snv
	7	5604858	ATGTTTG	A	0.623377	WZS01853-ZF3_153-Control	control_CRISPR	somatic	intron_variant	MODIFIER	SLC35B3	ENSSSCG00000001033	indel
	14	133185700	G	A	0.588235	WZS01853-ZF3_153-Control	control_CRISPR	somatic	intron_variant	MODIFIER	GPR26	ENSSSCG00000010727	snv
	4	71575374	T	G	0.490909	WZS01853-ZF3_153-Control	control_CRISPR	somatic	intergenic_region	MODIFIER	ENSSSCG00000042611-ENSSSCG00000044388	ENSSSCG00000042611-ENSSSCG00000044388	snv
	15	74548277	T	C	0.478261	WZS01853-ZF3_153-Control	control_CRISPR	somatic	intron_variant	MODIFIER	STK39	ENSSSCG00000022496	snv
	6	150758181	G	C	0.418182	WZS01853-ZF3_153-Control	control_CRISPR	somatic	downstream_gene_variant	MODIFIER	ENSSSCG00000051272	ENSSSCG00000051272	snv
	15	32839539	G	T	0.40566	WZS01853-ZF3_153-Control	control_CRISPR	somatic	intron_variant	MODIFIER	ENSSSCG00000015746	ENSSSCG00000015746	snv
	13	64474088	C	G	0.465116	WZS01853-ZF3_153-Control	control_CRISPR	somatic	intergenic_region	MODIFIER	ENSSSCG00000048123-LMCD1	ENSSSCG00000048123-ENSSSCG00000011538	snv
	15	24217952	A	G	0.477612	WZS01853-ZF3_153-Control	control_CRISPR	somatic	intergenic_region	MODIFIER	ENSSSCG00000047237-EN1	ENSSSCG00000047237-ENSSSCG00000015715	snv
	7	32684176	G	A	0.340659	WZS01853-ZF3_153-Control	control_CRISPR	somatic	downstream_gene_variant	MODIFIER	ENSSSCG00000048172	ENSSSCG00000048172	snv
	6	102758303	A	G	0.464912	WZS01853-ZF3_153-Control	control_CRISPR	somatic	intron_variant	MODIFIER	DLGAP1	ENSSSCG00000003690	snv
	11	66039692	G	A	0.211382	WZS01853-ZF3_153-Control	control_CRISPR	somatic	intron_variant	MODIFIER	HS6ST3	ENSSSCG00000009503	snv
	7	121633284	C	A	0.45679	WZS01853-ZF3_153-Control	control_CRISPR	somatic	intergenic_region	MODIFIER	DLK1-ENSSSCG00000051274	ENSSSCG00000035805-ENSSSCG00000051274	snv
	17	20123754	T	TC	0.51	WZS01853-ZF3_153-Control	control_CRISPR	somatic	intergenic_region	MODIFIER	ENSSSCG00000041976-ENSSSCG00000045897	ENSSSCG00000041976-ENSSSCG00000045897	indel
	11	44321449	G	A	0.495726	WZS01853-ZF3_153-Control	control_CRISPR	somatic	intergenic_region	MODIFIER	DACH1-U6	ENSSSCG00000009457-ENSSSCG00000018387	snv
	4	41604293	G	GA	0.380435	WZS01853-ZF3_153-Control	control_CRISPR	somatic	intergenic_region	MODIFIER	PLEKHF2-NDUFAF6	ENSSSCG00000039549-ENSSSCG00000006093	indel
	1	47663019	A	G	0.382353	WZS01853-ZF3_153-Control	control_CRISPR	somatic	intergenic_region	MODIFIER	U2-ENSSSCG00000050497	ENSSSCG00000043187-ENSSSCG00000050497	snv
	3	92173640	G	T	0.404959	WZS01853-ZF3_153-Control	control_CRISPR	somatic	intron_variant	MODIFIER	PPP1R21	ENSSSCG00000008423	snv
	4	58829232	A	G	0.490909	WZS01853-ZF3_153-Control	control_CRISPR	somatic	intergenic_region	MODIFIER	U6-ENSSSCG00000033751	ENSSSCG00000031935-ENSSSCG00000033751	snv
	15	15292726	A	G	0.51773	WZS01853-ZF3_153-Control	control_CRISPR	somatic	intergenic_region	MODIFIER	ENSSSCG00000045566-ENSSSCG00000049669	ENSSSCG00000045566-ENSSSCG00000049669	snv
	8	7611888	C	T	0.468531	WZS01853-ZF3_153-Control	control_CRISPR	somatic	intergenic_region	MODIFIER	ENSSSCG00000051157-ENSSSCG00000049250	ENSSSCG00000051157-ENSSSCG00000049250	snv
	14	96808152	C	A	0.522222	WZS01853-ZF3_153-Control	control_CRISPR	somatic	intergenic_region	MODIFIER	ENSSSCG00000036144-ENSSSCG00000051056	ENSSSCG00000036144-ENSSSCG00000051056	snv
	12	28964748	G	T	0.507246	WZS01853-ZF3_153-Control	control_CRISPR	somatic	intergenic_region	MODIFIER	ENSSSCG00000043336-ENSSSCG00000047265	ENSSSCG00000043336-ENSSSCG00000047265	snv
	16	9367014	A	G	0.458333	WZS01853-ZF3_153-Control	control_CRISPR	somatic	intergenic_region	MODIFIER	ENSSSCG00000043949-ENSSSCG00000047738	ENSSSCG00000043949-ENSSSCG00000047738	snv
	4	69828009	A	G	0.33871	WZS01853-ZF3_153-Control	control_CRISPR	somatic	intergenic_region	MODIFIER	CYP7B1-ENSSSCG00000040677	ENSSSCG00000022092-ENSSSCG00000040677	snv
	17	18937462	T	C	0.528846	WZS01853-ZF3_153-Control	control_CRISPR	somatic	intergenic_region	MODIFIER	PAK5-ANKEF1	ENSSSCG00000007061-ENSSSCG00000007063	snv
	8	45668030	G	A	0.314286	WZS01853-ZF3_153-Control	control_CRISPR	somatic	intron_variant	MODIFIER	PDGFC	ENSSSCG00000024960	snv
	1	44734535	T	G	0.508772	WZS01853-ZF3_153-Control	control_CRISPR	somatic	intron_variant	MODIFIER	ENSSSCG00000048099	ENSSSCG00000048099	snv
	1	178341703	A	G	0.436893	WZS01853-ZF3_153-Control	control_CRISPR	somatic	intron_variant	MODIFIER	ENSSSCG00000041258	ENSSSCG00000041258	snv
	6	170720745	T	C	0.418033	WZS01853-ZF3_153-Control	control_CRISPR	somatic	3_prime_UTR_variant	MODIFIER	SMAP2	ENSSSCG00000003983	snv
	5	68753303	G	T	0.424242	WZS01853-ZF3_153-Control	control_CRISPR	somatic	upstream_gene_variant	MODIFIER	ADIPOR2	ENSSSCG00000000757	snv
	12	56089431	G	T	0.52381	WZS01853-ZF3_153-Control	control_CRISPR	somatic	intron_variant	MODIFIER	DNAH9	ENSSSCG00000018015	snv
	1	50644212	T	C	0.381295	WZS01853-ZF3_153-Control	control_CRISPR	somatic	upstream_gene_variant	MODIFIER	FAM135A	ENSSSCG00000004275	snv
	1	199130966	G	A	0.451613	WZS01853-ZF3_153-Control	control_CRISPR	somatic	intron_variant	MODIFIER	ELAVL2	ENSSSCG00000005130	snv
	10	36982520	C	T	0.544715	WZS01853-ZF3_153-Control	control_CRISPR	somatic	intergenic_region	MODIFIER	U2-ENSSSCG00000047218	ENSSSCG00000044297-ENSSSCG00000047218	snv
	1	197823595	T	C	0.49505	WZS01853-ZF3_153-Control	control_CRISPR	somatic	intergenic_region	MODIFIER	TUSC1-IZUMO3	ENSSSCG00000005128-ENSSSCG00000005129	snv
	6	58072375	T	C	0.485714	WZS01853-ZF3_153-Control	control_CRISPR	somatic	intron_variant	MODIFIER	ENSSSCG00000040419	ENSSSCG00000040419	snv
	16	8424726	A	G	0.473684	WZS01853-ZF3_153-Control	control_CRISPR	somatic	intron_variant	MODIFIER	CDH18	ENSSSCG00000026842	snv
	1	172252134	CT	C	0.626087	WZS01853-ZF3_153-Control	control_CRISPR	somatic	intergenic_region	MODIFIER	LRFN5-ENSSSCG00000041306	ENSSSCG00000004990-ENSSSCG00000041306	indel
	15	129451035	C	A	0.495798	WZS01853-ZF3_153-Control	control_CRISPR	somatic	intron_variant	MODIFIER	SPHKAP	ENSSSCG00000016256	snv
	7	51276684	G	A	0.598361	WZS01853-ZF3_153-Control	control_CRISPR	somatic	intron_variant	MODIFIER	ADAMTSL3	ENSSSCG00000001793	snv
	15	3580191	G	T	0.523077	WZS01853-ZF3_153-Control	control_CRISPR	somatic	intergenic_region	MODIFIER	EPC2-MBD5	ENSSSCG00000027211-ENSSSCG00000015667	snv
	3	132752279	G	T	0.473214	WZS01853-ZF3_153-Control	control_CRISPR	somatic	upstream_gene_variant	MODIFIER	ENSSSCG00000045322	ENSSSCG00000045322	snv
	10	27261688	C	A	0.534483	WZS01853-ZF3_153-Control	control_CRISPR	somatic	intron_variant	MODIFIER	AOPEP	ENSSSCG00000010943	snv
	12	2938857	A	G	0.583333	WZS01853-ZF3_153-Control	control_CRISPR	somatic	intron_variant	MODIFIER	RBFOX3	ENSSSCG00000039498	snv
	9	54232824	G	A	0.40625	WZS01853-ZF3_153-Control	control_CRISPR	somatic	intergenic_region	MODIFIER	KIRREL3-ENSSSCG00000048188	ENSSSCG00000015234-ENSSSCG00000048188	snv
	1	88677127	C	A	0.53211	WZS01853-ZF3_153-Control	control_CRISPR	somatic	intergenic_region	MODIFIER	HTR1B-ENSSSCG00000046698	ENSSSCG00000004475-ENSSSCG00000046698	snv
	11	3682554	T	A	0.444444	WZS01853-ZF3_153-Control	control_CRISPR	somatic	intron_variant	MODIFIER	ATP8A2	ENSSSCG00000035421	snv
	6	8195111	G	T	0.532468	WZS01853-ZF3_153-Control	control_CRISPR	somatic	intergenic_region	MODIFIER	ENSSSCG00000050553-ENSSSCG00000042592	ENSSSCG00000050553-ENSSSCG00000042592	snv
	8	33989147	T	A	0.4	WZS01853-ZF3_153-Control	control_CRISPR	somatic	intergenic_region	MODIFIER	GRXCR1-ENSSSCG00000037522	ENSSSCG00000008804-ENSSSCG00000037522	snv
	8	84780388	T	C	0.435185	WZS01853-ZF3_153-Control	control_CRISPR	somatic	intergenic_region	MODIFIER	USP38-INPP4B	ENSSSCG00000009049-ENSSSCG00000009050	snv
	8	36362392	A	T	0.576642	WZS01853-ZF3_153-sgRNACas9-KO-	control_CRISPR	somatic	intron_variant	MODIFIER	GABRA2	ENSSSCG00000028922	snv
	9	69832178	A	G	0.48	WZS01853-ZF3_153-sgRNACas9-KO-	control_CRISPR	somatic	intergenic_region	MODIFIER	ZNF804B-ENSSSCG00000043318	ENSSSCG00000015300-ENSSSCG00000043318	snv
	9	7974353	T	C	0.366667	WZS01853-ZF3_153-sgRNACas9-KO-	control_CRISPR	somatic	intron_variant	MODIFIER	FAM168A	ENSSSCG00000039996	snv
	1	47785951	T	G	0.472727	WZS01853-ZF3_153-sgRNACas9-KO-	control_CRISPR	somatic	intergenic_region	MODIFIER	U2-ENSSSCG00000050497	ENSSSCG00000043187-ENSSSCG00000050497	snv
	15	9984328	C	A	0.581197	WZS01853-ZF3_153-sgRNACas9-KO-	control_CRISPR	somatic	intron_variant	MODIFIER	LRP1B	ENSSSCG00000023746	snv
	12	26327623	T	C	0.196429	WZS01853-ZF3_153-sgRNACas9-KO-	control_CRISPR	somatic	synonymous_variant	LOW	PPP1R9B	ENSSSCG00000017584	snv
	6	156505917	T	C	0.191489	WZS01853-ZF3_153-sgRNACas9-KO-	control_CRISPR	somatic	intergenic_region	MODIFIER	ENSSSCG00000047160-ENSSSCG00000042401	ENSSSCG00000047160-ENSSSCG00000042401	snv
	5	26829103	A	C	0.459854	WZS01853-ZF3_153-sgRNACas9-KO-	control_CRISPR	somatic	intergenic_region	MODIFIER	TAFA2-ENSSSCG00000041120	ENSSSCG00000034686-ENSSSCG00000041120	snv
	6	86979646	T	G	0.449612	WZS01853-ZF3_153-sgRNACas9-KO-	control_CRISPR	somatic	intergenic_region	MODIFIER	ENSSSCG00000045013-ENSSSCG00000041271	ENSSSCG00000045013-ENSSSCG00000041271	snv
	1	216026424	T	G	0.590793	WZS01853-ZF3_153-sgRNACas9-KO-	control_CRISPR	somatic	intron_variant	MODIFIER	RANBP6	ENSSSCG00000005204	snv
	15	34457123	T	G	0.485075	WZS01853-ZF3_153-sgRNACas9-KO-	control_CRISPR	somatic	intron_variant	MODIFIER	CSMD1	ENSSSCG00000015748	snv
	13	122553661	C	T	0.503937	WZS01853-ZF3_153-sgRNACas9-KO-	control_CRISPR	somatic	intergenic_region	MODIFIER	EPHB3-MAGEF1	ENSSSCG00000026516-ENSSSCG00000011787	snv
	7	80089318	A	G	0.489362	WZS01853-ZF3_153-sgRNACas9-KO-	control_CRISPR	somatic	intron_variant	MODIFIER	LPCAT4	ENSSSCG00000002235	snv
	1	60899113	A	G	0.416667	WZS01853-ZF3_153-sgRNACas9-KO-	control_CRISPR	somatic	intron_variant	MODIFIER	EPHA7	ENSSSCG00000004336	snv
	4	23907053	T	C	0.52459	WZS01853-ZF3_153-sgRNACas9-KO-	control_CRISPR	somatic	intergenic_region	MODIFIER	ENSSSCG00000046772-U6	ENSSSCG00000046772-ENSSSCG00000020360	snv
	3	69771989	A	G	0.408	WZS01853-ZF3_153-sgRNACas9-KO-	control_CRISPR	somatic	intron_variant	MODIFIER	SFXN5	ENSSSCG00000008307	snv
	8	744343	C	A	0.471429	WZS01853-ZF3_153-sgRNACas9-KO-	control_CRISPR	somatic	intergenic_region	MODIFIER	NKX1-1-FAM53A	ENSSSCG00000038573-ENSSSCG00000032633	snv
	11	60837316	T	C	0.494505	WZS01853-ZF3_153-sgRNACas9-KO-	control_CRISPR	somatic	intron_variant	MODIFIER	GPC5	ENSSSCG00000031946	snv
	13	53978294	G	T	0.515385	WZS01853-ZF3_153-sgRNACas9-KO-	control_CRISPR	somatic	intergenic_region	MODIFIER	ENSSSCG00000046660-ENSSSCG00000044514	ENSSSCG00000046660-ENSSSCG00000044514	snv
	12	56948224	A	T	0.612795	WZS01853-ZF3_153-sgRNACas9-KO-	control_CRISPR	somatic	intron_variant	MODIFIER	MYOCD	ENSSSCG00000031988	snv
	2	94387495	C	A	0.47619	WZS01853-ZF3_153-sgRNACas9-KO-	control_CRISPR	somatic	intergenic_region	MODIFIER	COX7C-ENSSSCG00000046920	ENSSSCG00000040325-ENSSSCG00000046920	snv
	7	69498587	C	A	0.457746	WZS01853-ZF3_153-sgRNACas9-KO-	control_CRISPR	somatic	intergenic_region	MODIFIER	ENSSSCG00000043721-PRKD1	ENSSSCG00000043721-ENSSSCG00000001975	snv
	11	26993883	T	C	0.447368	WZS01853-ZF3_153-sgRNACas9-KO-	control_CRISPR	somatic	intergenic_region	MODIFIER	ENSSSCG00000036916-U6	ENSSSCG00000036916-ENSSSCG00000019244	snv
	11	40360955	A	G	0.556391	WZS01853-ZF3_153-sgRNACas9-KO-	control_CRISPR	somatic	intergenic_region	MODIFIER	ENSSSCG00000047489-ENSSSCG00000048977	ENSSSCG00000047489-ENSSSCG00000048977	snv
	15	120369948	A	G	0.488889	WZS01853-ZF3_153-sgRNACas9-KO-	control_CRISPR	somatic	upstream_gene_variant	MODIFIER	TMBIM1	ENSSSCG00000016186	snv
	4	31394758	G	T	0.509934	WZS01853-ZF3_153-sgRNACas9-KO-	control_CRISPR	somatic	intron_variant	MODIFIER	OXR1	ENSSSCG00000006037	snv
	2	29962967	C	T	0.53125	WZS01853-ZF3_153-sgRNACas9-KO-	control_CRISPR	somatic	intergenic_region	MODIFIER	ENSSSCG00000041776-MPPED2	ENSSSCG00000041776-ENSSSCG00000013327	snv
	14	18756184	G	C	0.464567	WZS01853-ZF3_153-sgRNACas9-KO-	control_CRISPR	somatic	intergenic_region	MODIFIER	ENSSSCG00000044025-ENSSSCG00000042965	ENSSSCG00000044025-ENSSSCG00000042965	snv
	14	119733658	C	G	0.219512	WZS01853-ZF3_153-sgRNACas9-KO-	control_CRISPR	somatic	intergenic_region	MODIFIER	ENSSSCG00000047504-ENSSSCG00000045329	ENSSSCG00000047504-ENSSSCG00000045329	snv
	1	69031446	TA	T	0.518868	WZS01853-ZF3_153-sgRNACas9-KO-	control_CRISPR	somatic	intergenic_region	MODIFIER	GRIK2-ENSSSCG00000046266	ENSSSCG00000004361-ENSSSCG00000046266	indel
	1	212959055	G	GAT	0.507937	WZS01853-ZF3_153-sgRNACas9-KO-	control_CRISPR	somatic	intergenic_region	MODIFIER	ENSSSCG00000048293-ENSSSCG00000041358	ENSSSCG00000048293-ENSSSCG00000041358	indel
	2	108574056	C	A	0.428571	WZS01853-ZF3_153-sgRNACas9-KO-	control_CRISPR	somatic	intron_variant	MODIFIER	GIN1	ENSSSCG00000025287	snv
	10	4485376	G	C	0.571429	WZS01853-ZF3_153-sgRNACas9-KO-	control_CRISPR	somatic	intergenic_region	MODIFIER	Y_RNA-ENSSSCG00000045101	ENSSSCG00000018504-ENSSSCG00000045101	snv
	1	75480750	C	A	0.553719	WZS01853-ZF3_153-sgRNACas9-KO-	control_CRISPR	somatic	upstream_gene_variant	MODIFIER	ENSSSCG00000048459	ENSSSCG00000048459	snv
	1	45589495	A	G	0.478632	WZS01853-ZF3_153-sgRNACas9-KO-	control_CRISPR	somatic	intergenic_region	MODIFIER	PHF3-ENSSSCG00000049526	ENSSSCG00000035259-ENSSSCG00000049526	snv
	11	58267142	A	T	0.469565	WZS01853-ZF3_153-sgRNACas9-KO-	control_CRISPR	somatic	intergenic_region	MODIFIER	ENSSSCG00000050699-ENSSSCG00000048437	ENSSSCG00000050699-ENSSSCG00000048437	snv
	2	114561457	A	G	0.428571	WZS01853-ZF3_153-sgRNACas9-KO-	control_CRISPR	somatic	intron_variant	MODIFIER	PJA2	ENSSSCG00000022845	snv
	8	53576583	T	A	0.51773	WZS01853-ZF3_153-sgRNACas9-KO-	control_CRISPR	somatic	upstream_gene_variant	MODIFIER	SMIM31	ENSSSCG00000038890	snv
	4	107542584	C	A	0.253731	WZS01853-ZF3_153-sgRNACas9-KO-	control_CRISPR	somatic	intron_variant	MODIFIER	SLC16A1	ENSSSCG00000006771	snv
	5	66032624	G	T	0.524823	WZS01853-ZF3_153-sgRNACas9-KO-	control_CRISPR	somatic	intron_variant	MODIFIER	FGF23	ENSSSCG00000039492	snv
	4	66631025	T	A	0.503704	WZS01853-ZF3_153-sgRNACas9-KO-	control_CRISPR	somatic	intron_variant	MODIFIER	C8orf34	ENSSSCG00000035887	snv
	13	149782881	T	C	0.513699	WZS01853-ZF3_153-sgRNACas9-KO-	control_CRISPR	somatic	intergenic_region	MODIFIER	ENSSSCG00000049678-ENSSSCG00000048592	ENSSSCG00000049678-ENSSSCG00000048592	snv
	15	47917043	G	A	0.553846	WZS01853-ZF3_153-sgRNACas9-KO-	control_CRISPR	somatic	intergenic_region	MODIFIER	ENSSSCG00000049772-FGFR1	ENSSSCG00000049772-ENSSSCG00000015815	snv
	4	92099062	T	C	0.327273	WZS01853-ZF3_153-sgRNACas9-KO-	control_CRISPR	somatic	synonymous_variant	LOW	ENSSSCG00000006452	ENSSSCG00000006452	snv
	6	32947439	A	G	0.378788	WZS01853-ZF3_153-sgRNACas9-KO-	control_CRISPR	somatic	intergenic_region	MODIFIER	ENSSSCG00000042804-ENSSSCG00000042676	ENSSSCG00000042804-ENSSSCG00000042676	snv
	1	162879740	A	G	0.493506	WZS01853-ZF3_153-sgRNACas9-KO-	control_CRISPR	somatic	intergenic_region	MODIFIER	NEDD4L-ATP8B1	ENSSSCG00000004919-ENSSSCG00000004921	snv
	2	110831429	T	A	0.431034	WZS01853-ZF3_153-sgRNACas9-KO-	control_CRISPR	somatic	intergenic_region	MODIFIER	ENSSSCG00000049953-ENSSSCG00000051043	ENSSSCG00000049953-ENSSSCG00000051043	snv
	15	71802621	A	G	0.271318	WZS01853-ZF3_153-sgRNACas9-KO-	control_CRISPR	somatic	intron_variant	MODIFIER	SCN3A	ENSSSCG00000015911	snv
	1	101808795	T	G	0.391892	WZS01853-ZF3_153-sgRNACas9-KO-	control_CRISPR	somatic	intron_variant	MODIFIER	ENSSSCG00000051201	ENSSSCG00000051201	snv
	13	104264397	A	G	0.4	WZS01853-ZF3_153-sgRNACas9-KO-	control_CRISPR	somatic	intergenic_region	MODIFIER	ENSSSCG00000045618-SI	ENSSSCG00000045618-ENSSSCG00000011735	snv
	4	27274863	G	A	0.558333	WZS01853-ZF3_153-sgRNACas9-KO-	control_CRISPR	somatic	intergenic_region	MODIFIER	ENSSSCG00000050139-ENSSSCG00000050037	ENSSSCG00000050139-ENSSSCG00000050037	snv
	11	77051737	C	A	0.414634	WZS01853-ZF3_153-sgRNACas9-KO-	control_CRISPR	somatic	intron_variant	MODIFIER	COL4A2	ENSSSCG00000009545	snv
	14	18499860	A	G	0.6	WZS01853-ZF3_153-sgRNACas9-KO-	control_CRISPR	somatic	intergenic_region	MODIFIER	ENSSSCG00000047433-ENSSSCG00000042330	ENSSSCG00000047433-ENSSSCG00000042330	snv
	14	75286037	AG	A	0.514019	WZS01853-ZF3_153-sgRNACas9-KO-	control_CRISPR	somatic	intron_variant	MODIFIER	DNAJB12	ENSSSCG00000010288	indel
	15	51352894	C	A	0.468966	WZS01853-ZF3_153-sgRNACas9-KO-	control_CRISPR	somatic	intergenic_region	MODIFIER	ENSSSCG00000044341-ENSSSCG00000042616	ENSSSCG00000044341-ENSSSCG00000042616	snv
	15	91175443	T	C	0.444444	WZS01853-ZF3_153-sgRNACas9-KO-	control_CRISPR	somatic	intergenic_region	MODIFIER	ENSSSCG00000044684-ENSSSCG00000041956	ENSSSCG00000044684-ENSSSCG00000041956	snv
	16	8898689	G	T	0.468254	WZS01853-ZF3_153-sgRNACas9-KO-	control_CRISPR	somatic	intergenic_region	MODIFIER	ENSSSCG00000043949-ENSSSCG00000047738	ENSSSCG00000043949-ENSSSCG00000047738	snv
	2	126581986	G	C	0.443439	WZS01853-ZF3_153-sgRNACas9-KO-	control_CRISPR	somatic	intergenic_region	MODIFIER	ENSSSCG00000047113-PRDM6	ENSSSCG00000047113-ENSSSCG00000014238	snv
	3	62991291	C	T	0.518519	WZS01853-ZF3_153-sgRNACas9-KO-	control_CRISPR	somatic	intergenic_region	MODIFIER	U6-U6	ENSSSCG00000035540-ENSSSCG00000024141	snv
	6	138238413	G	C	0.53719	WZS01853-ZF3_153-sgRNACas9-KO-	control_CRISPR	somatic	intergenic_region	MODIFIER	LHX8-ENSSSCG00000051208	ENSSSCG00000003778-ENSSSCG00000051208	snv
	1	102260872	T	A	0.4	WZS01853-ZF3_153-sgRNACas9-KO-	control_CRISPR	somatic	intron_variant	MODIFIER	DCC	ENSSSCG00000040836	snv
	3	110846100	T	G	0.237288	WZS01853-ZF3_153-sgRNACas9-KO-	control_CRISPR	somatic	upstream_gene_variant	MODIFIER	FOSL2	ENSSSCG00000032527	snv
	6	83768027	C	T	0.526718	WZS01853-ZF3_153-sgRNACas9-KO-	control_CRISPR	somatic	upstream_gene_variant	MODIFIER	ZNF683	ENSSSCG00000040579	snv
	13	141923306	AT	A	0.490566	WZS01853-ZF3_153-sgRNACas9-KO-	control_CRISPR	somatic	intergenic_region	MODIFIER	ENSSSCG00000034750-U6	ENSSSCG00000034750-ENSSSCG00000019813	indel
	5	500439	G	A	0.292308	WZS01853-ZF3_153-sgRNACas9-KO-	control_CRISPR	somatic	synonymous_variant	LOW	PANX2	ENSSSCG00000000975	snv
	6	15050885	G	A	0.495495	WZS01853-ZF3_153-sgRNACas9-KO-	control_CRISPR	somatic	intron_variant	MODIFIER	PMFBP1	ENSSSCG00000002747	snv
	10	54364125	G	T	0.535032	WZS01853-ZF3_153-sgRNACas9-KO-	control_CRISPR	somatic	intron_variant	MODIFIER	PLXDC2	ENSSSCG00000032444	snv
	8	92012936	A	G	0.52381	WZS01853-ZF3_153-sgRNACas9-KO-	control_CRISPR	somatic	intergenic_region	MODIFIER	ENSSSCG00000050034-PABPC4L	ENSSSCG00000050034-ENSSSCG00000009067	snv
	7	76311113	T	G	0.191304	WZS01853-ZF3_153-sgRNACas9-KO-	control_CRISPR	somatic	intergenic_region	MODIFIER	ENSSSCG00000051132-ENSSSCG00000051759	ENSSSCG00000051132-ENSSSCG00000051759	snv
	10	6793790	A	C	0.485981	WZS01853-ZF3_153-sgRNACas9-KO-	control_CRISPR	somatic	intron_variant	MODIFIER	ESRRG	ENSSSCG00000010814	snv
	14	69666168	A	G	0.607143	WZS01853-ZF3_153-sgRNACas9-KO-	control_CRISPR	somatic	intron_variant	MODIFIER	CTNNA3	ENSSSCG00000036480	snv
	3	132072094	G	A	0.449275	WZS01853-ZF3_153-sgRNACas9-KO-	control_CRISPR	somatic	intron_variant	MODIFIER	ENSSSCG00000049737	ENSSSCG00000049737	snv
	5	67507105	A	C	0.55	WZS01853-ZF3_153-sgRNACas9-KO-	control_CRISPR	somatic	intron_variant	MODIFIER	IQSEC3	ENSSSCG00000000748	snv
	13	172268505	A	G	0.52459	WZS01853-ZF3_153-sgRNACas9-KO-	control_CRISPR	somatic	intergenic_region	MODIFIER	ENSSSCG00000050907-ENSSSCG00000029127	ENSSSCG00000050907-ENSSSCG00000029127	snv
	15	44834504	G	A	0.441441	WZS01853-ZF3_153-sgRNACas9-KO-	control_CRISPR	somatic	intergenic_region	MODIFIER	ENSSSCG00000022456-CDKN2AIP	ENSSSCG00000022456-ENSSSCG00000015779	snv
	12	30081907	G	C	0.453125	WZS01853-ZF3_153-sgRNACas9-KO-	control_CRISPR	somatic	intergenic_region	MODIFIER	ENSSSCG00000047265-KIF2B	ENSSSCG00000047265-ENSSSCG00000017599	snv
	14	12267367	C	T	0.508264	WZS01853-ZF3_153-sgRNACas9-KO-	control_CRISPR	somatic	intron_variant	MODIFIER	ZNF395	ENSSSCG00000009676	snv
	15	10593232	A	C	0.45283	WZS01853-ZF3_153-sgRNACas9-KO-	control_CRISPR	somatic	intron_variant	MODIFIER	LRP1B	ENSSSCG00000023746	snv
	2	145062519	A	G	0.493056	WZS01853-ZF3_153-sgRNACas9-KO-	control_CRISPR	somatic	intron_variant	MODIFIER	ENSSSCG00000044810	ENSSSCG00000044810	snv
	15	12964918	C	A	0.381818	WZS01853-ZF3_153-sgRNACas9-KO-	control_CRISPR	somatic	intron_variant	MODIFIER	NXPH2	ENSSSCG00000040715	snv
	16	41612377	G	T	0.428571	WZS01853-ZF3_153-sgRNACas9-KO-	control_CRISPR	somatic	intergenic_region	MODIFIER	IPO11-ENSSSCG00000046520	ENSSSCG00000016938-ENSSSCG00000046520	snv
	5	85052871	C	T	0.496124	WZS01853-ZF3_153-sgRNACas9-KO-	control_CRISPR	somatic	intron_variant	MODIFIER	ANKS1B	ENSSSCG00000022083	snv
	8	78321558	G	T	0.558559	WZS01853-ZF3_153-sgRNACas9-KO-	control_CRISPR	somatic	intron_variant	MODIFIER	LRBA	ENSSSCG00000009021	snv
	5	96957368	C	A	0.48	WZS01853-ZF3_153-sgRNACas9-KO-	control_CRISPR	somatic	intron_variant	MODIFIER	LRRIQ1	ENSSSCG00000000934	snv
	6	164421701	G	T	0.28125	WZS01853-ZF3_153-sgRNACas9-KO-	control_CRISPR	somatic	downstream_gene_variant	MODIFIER	ENSSSCG00000024129	ENSSSCG00000024129	snv
	15	134830943	A	C	0.560748	WZS01853-ZF3_153-sgRNACas9-KO-	control_CRISPR	somatic	intron_variant	MODIFIER	ENSSSCG00000043599	ENSSSCG00000043599	snv
	10	3183470	A	G	0.522727	WZS01853-ZF3_153-sgRNACas9-KO-	control_CRISPR	somatic	intron_variant	MODIFIER	BRINP3	ENSSSCG00000010809	snv
	9	103978136	G	A	0.489362	WZS01853-ZF3_153-sgRNACas9-KO-	control_CRISPR	somatic	intron_variant	MODIFIER	ORC5	ENSSSCG00000015427	snv
	8	37028480	C	T	0.351759	WZS01853-ZF3_153-sgRNACas9-KO-	control_CRISPR	somatic	intron_variant	MODIFIER	GABRB1	ENSSSCG00000035621	snv
	15	27698137	A	G	0.231343	WZS01853-ZF3_153-sgRNACas9-KO-	control_CRISPR	somatic	intron_variant	MODIFIER	CNTNAP5	ENSSSCG00000015726	snv
	2	21512452	G	A	0.535714	WZS01853-ZF3_153-sgRNACas9-KO-	control_CRISPR	somatic	intron_variant	MODIFIER	LRRC4C	ENSSSCG00000013286	snv
	14	12272073	A	G	0.375	WZS01853-ZF3_153-sgRNACas9-KO-	control_CRISPR	somatic	missense_variant	MODERATE	ZNF395	ENSSSCG00000009676	snv
	1	62648589	G	T	0.528926	WZS01853-ZF3_153-sgRNACas9-KO-	control_CRISPR	somatic	intergenic_region	MODIFIER	ENSSSCG00000044734-U6	ENSSSCG00000044734-ENSSSCG00000020518	snv
	18	47115804	T	C	0.525862	WZS01853-ZF3_153-sgRNACas9-KO-	control_CRISPR	somatic	upstream_gene_variant	MODIFIER	C7orf31	ENSSSCG00000033313	snv
	14	129066446	G	C	0.4375	WZS01853-ZF3_153-sgRNACas9-KO-	control_CRISPR	somatic	intron_variant	MODIFIER	SFXN4	ENSSSCG00000010681	snv
	3	60444035	T	G	0.5	WZS01853-ZF3_153-sgRNACas9-KO-	control_CRISPR	somatic	upstream_gene_variant	MODIFIER	ENSSSCG00000044831	ENSSSCG00000044831	snv
	15	63025255	T	G	0.5	WZS01853-ZF3_153-sgRNACas9-KO-	control_CRISPR	somatic	intergenic_region	MODIFIER	U6-ENSSSCG00000043788	ENSSSCG00000034643-ENSSSCG00000043788	snv
	5	26203839	A	T	0.517007	WZS01853-ZF3_153-sgRNACas9-KO-	control_CRISPR	somatic	intergenic_region	MODIFIER	ENSSSCG00000050548-ENSSSCG00000050881	ENSSSCG00000050548-ENSSSCG00000050881	snv
	7	106328287	A	C	0.480315	WZS01853-ZF3_153-sgRNACas9-KO-	control_CRISPR	somatic	intergenic_region	MODIFIER	ENSSSCG00000043996-ENSSSCG00000044398	ENSSSCG00000043996-ENSSSCG00000044398	snv
	9	59063773	G	C	0.495798	WZS01853-ZF3_153-sgRNACas9-KO-	control_CRISPR	somatic	intron_variant	MODIFIER	OPCML	ENSSSCG00000037534	snv
	6	162389653	T	G	0.642857	WZS01853-ZF3_153-sgRNACas9-KO-	control_CRISPR	somatic	intron_variant	MODIFIER	AGBL4	ENSSSCG00000031300	snv
	5	21824549	G	C	0.45283	WZS01853-ZF3_153-sgRNACas9-KO-	control_CRISPR	somatic	upstream_gene_variant	MODIFIER	GLS2	ENSSSCG00000000401	snv
	14	98525773	A	C	0.424779	WZS01853-ZF3_153-sgRNACas9-KO-	control_CRISPR	somatic	upstream_gene_variant	MODIFIER	ENSSSCG00000048132	ENSSSCG00000048132	snv
	8	24209830	G	T	0.492424	WZS01853-ZF3_153-sgRNACas9-KO-	control_CRISPR	somatic	intergenic_region	MODIFIER	PCDH7-ENSSSCG00000008767	ENSSSCG00000008765-ENSSSCG00000008767	snv
	18	21365450	C	A	0.468354	WZS01853-ZF3_153-sgRNACas9-KO-	control_CRISPR	somatic	intron_variant	MODIFIER	GRM8	ENSSSCG00000022865	snv
	8	123417026	A	G	0.609272	WZS01853-ZF3_153-sgRNACas9-KO-	control_CRISPR	somatic	intergenic_region	MODIFIER	ENSSSCG00000039281-ENSSSCG00000048784	ENSSSCG00000039281-ENSSSCG00000048784	snv
	11	54370955	C	G	0.411215	WZS01853-ZF3_153-sgRNACas9-KO-	control_CRISPR	somatic	intergenic_region	MODIFIER	ENSSSCG00000004054-ENSSSCG00000047723	ENSSSCG00000004054-ENSSSCG00000047723	snv
	9	84321967	T	G	0.54717	WZS01853-ZF3_153-sgRNACas9-KO-	control_CRISPR	somatic	intron_variant	MODIFIER	DGKB	ENSSSCG00000015355	snv
	3	70257577	G	A	0.5	WZS01853-ZF3_153-sgRNACas9-KO-	control_CRISPR	somatic	intron_variant	MODIFIER	EXOC6B	ENSSSCG00000008310	snv
	7	101115848	AT	A	0.345238	WZS01853-ZF3_153-sgRNACas9-KO-	control_CRISPR	somatic	intergenic_region	MODIFIER	ENSSSCG00000045007-NRXN3	ENSSSCG00000045007-ENSSSCG00000028942	indel
	15	28256312	A	G	0.554745	WZS01853-ZF3_153-sgRNACas9-KO-	control_CRISPR	somatic	intergenic_region	MODIFIER	ENSSSCG00000049651-ENSSSCG00000039209	ENSSSCG00000049651-ENSSSCG00000039209	snv
	16	7497896	G	C	0.47619	WZS01853-ZF3_153-sgRNACas9-KO-	control_CRISPR	somatic	intergenic_region	MODIFIER	ENSSSCG00000051524-ENSSSCG00000043590	ENSSSCG00000051524-ENSSSCG00000043590	snv
	2	105442427	C	A	0.519231	WZS01853-ZF3_153-sgRNACas9-KO-	control_CRISPR	somatic	intergenic_region	MODIFIER	ENSSSCG00000047063-ENSSSCG00000042948	ENSSSCG00000047063-ENSSSCG00000042948	snv
	4	130523241	C	A	0.512	WZS01853-ZF3_153-sgRNACas9-KO-	control_CRISPR	somatic	intron_variant	MODIFIER	DDAH1	ENSSSCG00000040735	snv
	13	177284621	G	A	0.198276	WZS01853-ZF3_153-sgRNACas9-KO-	control_CRISPR	somatic	intergenic_region	MODIFIER	ENSSSCG00000049695-ROBO2	ENSSSCG00000049695-ENSSSCG00000012002	snv
	1	174793494	C	A	0.454545	WZS01853-ZF3_153-sgRNACas9-KO-	control_CRISPR	somatic	intergenic_region	MODIFIER	ENSSSCG00000043072-C14orf28	ENSSSCG00000043072-ENSSSCG00000030679	snv
	13	205131925	C	CAT	0.125	WZS01853-ZF3_153-sgRNACas9-KO-	control_CRISPR	somatic	intron_variant	MODIFIER	RIPK4	ENSSSCG00000012083	indel
	11	26222978	C	T	0.453782	WZS01853-ZF3_153-sgRNACas9-KO-	control_CRISPR	somatic	intergenic_region	MODIFIER	PCDH8-OLFM4	ENSSSCG00000009445-ENSSSCG00000009444	snv
	14	21950816	G	A	0.548673	WZS01853-ZF3_153-sgRNACas9-KO-	control_CRISPR	somatic	intron_variant	MODIFIER	SPOCK3	ENSSSCG00000009722	snv
	4	7503299	AT	A	0.56	WZS01853-ZF3_153-sgRNACas9-KO-	control_CRISPR	somatic	intergenic_region	MODIFIER	ZFAT-ENSSSCG00000048755	ENSSSCG00000030947-ENSSSCG00000048755	indel
	15	135745940	A	C	0.470588	WZS01853-ZF3_153-sgRNACas9-KO-	control_CRISPR	somatic	intron_variant	MODIFIER	AGAP1	ENSSSCG00000016317	snv
	3	63567843	C	A	0.455224	WZS01853-ZF3_153-sgRNACas9-KO-	control_CRISPR	somatic	intron_variant	MODIFIER	ENSSSCG00000008250	ENSSSCG00000008250	snv
	1	101625809	C	A	0.518868	WZS01853-ZF3_153-sgRNACas9-KO-	control_CRISPR	somatic	intergenic_region	MODIFIER	ENSSSCG00000049543-ENSSSCG00000051201	ENSSSCG00000049543-ENSSSCG00000051201	snv
	18	28673316	A	G	0.431193	WZS01853-ZF3_153-sgRNACas9-KO-	control_CRISPR	somatic	intron_variant	MODIFIER	CFTR	ENSSSCG00000016626	snv
	13	177545495	A	C	0.481481	WZS01853-ZF3_153-sgRNACas9-KO-	control_CRISPR	somatic	intron_variant	MODIFIER	ROBO2	ENSSSCG00000012002	snv
	13	85015480	A	C	0.558824	WZS01853-ZF3_153-sgRNACas9-KO-	control_CRISPR	somatic	intergenic_region	MODIFIER	ENSSSCG00000047294-U2	ENSSSCG00000047294-ENSSSCG00000044482	snv
	1	240310080	C	A	0.227273	WZS01853-ZF3_153-sgRNACas9-KO-	control_CRISPR	somatic	intron_variant	MODIFIER	GABBR2	ENSSSCG00000027558	snv
	1	49752504	AG	A	0.269841	WZS01853-ZF3_153-sgRNACas9-KO-	control_CRISPR	somatic	intergenic_region	MODIFIER	ADGRB3-LMBRD1	ENSSSCG00000004270-ENSSSCG00000004272	indel
	4	44940338	C	T	0.410256	WZS01853-ZF3_153-sgRNACas9-KO-	control_CRISPR	somatic	intergenic_region	MODIFIER	RUNX1T1-ENSSSCG00000050942	ENSSSCG00000006115-ENSSSCG00000050942	snv
	17	6254740	CT	C	0.538462	WZS01853-ZF3_153-sgRNACas9-KO-	control_CRISPR	somatic	intergenic_region	MODIFIER	ENSSSCG00000044751-ENSSSCG00000049115	ENSSSCG00000044751-ENSSSCG00000049115	indel
	12	29306265	C	A	0.503597	WZS01853-ZF3_153-sgRNACas9-KO-	control_CRISPR	somatic	intergenic_region	MODIFIER	ENSSSCG00000047265-KIF2B	ENSSSCG00000047265-ENSSSCG00000017599	snv
	3	82564320	C	T	0.549618	WZS01853-ZF3_153-sgRNACas9-KO-	control_CRISPR	somatic	intergenic_region	MODIFIER	ENSSSCG00000042890-ENSSSCG00000042483	ENSSSCG00000042890-ENSSSCG00000042483	snv
	1	231577298	G	A	0.544643	WZS01853-ZF3_153-sgRNACas9-KO-	control_CRISPR	somatic	intergenic_region	MODIFIER	PSAT1-ENSSSCG00000041713	ENSSSCG00000005287-ENSSSCG00000041713	snv
	13	102983454	G	T	0.571429	WZS01853-ZF3_153-sgRNACas9-KO-	control_CRISPR	somatic	intergenic_region	MODIFIER	ENSSSCG00000045945-ENSSSCG00000020451	ENSSSCG00000045945-ENSSSCG00000020451	snv
	1	212311965	GTA	G	0.513514	WZS01853-ZF3_153-sgRNACas9-KO-	control_CRISPR	somatic	intergenic_region	MODIFIER	ENSSSCG00000048126-ENSSSCG00000043945	ENSSSCG00000048126-ENSSSCG00000043945	indel
	1	144414118	G	T	0.398148	WZS01853-ZF3_153-sgRNACas9-KO-	control_CRISPR	somatic	intron_variant	MODIFIER	FAM189A1	ENSSSCG00000004850	snv
	3	14858159	G	A	0.483146	WZS01853-ZF3_153-sgRNACas9-KO-	control_CRISPR	somatic	intergenic_region	MODIFIER	AUTS2-ENSSSCG00000049007	ENSSSCG00000007727-ENSSSCG00000049007	snv
	1	93039612	C	T	0.315271	WZS01853-ZF3_153-sgRNACas9-KO-	control_CRISPR	somatic	intergenic_region	MODIFIER	ENSSSCG00000031165-ENSSSCG00000039396	ENSSSCG00000031165-ENSSSCG00000039396	snv
	9	4458102	C	A	0.302326	WZS01853-ZF3_153-sgRNACas9-KO-	control_CRISPR	somatic	downstream_gene_variant	MODIFIER	ENSSSCG00000051672	ENSSSCG00000051672	snv
	5	88762225	G	T	0.460784	WZS01853-ZF3_153-sgRNACas9-KO-	control_CRISPR	somatic	intron_variant	MODIFIER	ENSSSCG00000047267	ENSSSCG00000047267	snv
	11	59542086	A	G	0.489655	WZS01853-ZF3_153-sgRNACas9-KO-	control_CRISPR	somatic	intergenic_region	MODIFIER	ENSSSCG00000044716-ENSSSCG00000043859	ENSSSCG00000044716-ENSSSCG00000043859	snv
	1	47335779	A	T	0.6	WZS01853-ZF3_153-sgRNACas9-KO-	control_CRISPR	somatic	intergenic_region	MODIFIER	U2-ENSSSCG00000050497	ENSSSCG00000043187-ENSSSCG00000050497	snv
	8	56665897	T	C	0.557895	WZS01853-ZF3_153-sgRNACas9-KO-	control_CRISPR	somatic	intergenic_region	MODIFIER	ENSSSCG00000044641-ENSSSCG00000048199	ENSSSCG00000044641-ENSSSCG00000048199	snv
	1	23440909	T	G	0.492063	WZS01853-ZF3_153-sgRNACas9-KO-	control_CRISPR	somatic	intergenic_region	MODIFIER	ENSSSCG00000049679-ENSSSCG00000043068	ENSSSCG00000049679-ENSSSCG00000043068	snv
	13	61176656	T	TA	0.409091	WZS01853-ZF3_153-sgRNACas9-KO-	control_CRISPR	somatic	intron_variant	MODIFIER	ITPR1	ENSSSCG00000023437	indel
	8	23863533	C	A	0.533898	WZS01853-ZF3_153-sgRNACas9-KO-	control_CRISPR	somatic	intron_variant	MODIFIER	PCDH7	ENSSSCG00000008765	snv
	6	61411564	C	A	0.505495	WZS01853-ZF3_153-sgRNACas9-KO-	control_CRISPR	somatic	intron_variant	MODIFIER	ENSSSCG00000035785	ENSSSCG00000035785	snv
	17	50365371	C	A	0.569536	WZS01853-ZF3_153-sgRNACas9-KO-	control_CRISPR	somatic	intron_variant	MODIFIER	PREX1	ENSSSCG00000031118	snv
	18	17234978	C	T	0.63	WZS01853-ZF3_153-sgRNACas9-KO-	control_CRISPR	somatic	intergenic_region	MODIFIER	PLXNA4-ENSSSCG00000047208	ENSSSCG00000021562-ENSSSCG00000047208	snv
	2	133842213	G	A	0.470588	WZS01853-ZF3_153-sgRNACas9-KO-	control_CRISPR	somatic	intron_variant	MODIFIER	ENSSSCG00000014267	ENSSSCG00000014267	snv
	9	129607785	C	G	0.489583	WZS01853-ZF3_153-sgRNACas9-KO-	control_CRISPR	somatic	intron_variant	MODIFIER	ENSSSCG00000045230	ENSSSCG00000045230	snv
	13	99078004	C	A	0.407895	WZS01853-ZF3_153-sgRNACas9-KO-	control_CRISPR	somatic	intron_variant	MODIFIER	ENSSSCG00000011729	ENSSSCG00000011729	snv
	1	174473690	T	A	0.454545	WZS01853-ZF3_153-sgRNACas9-KO-	control_CRISPR	somatic	intergenic_region	MODIFIER	ENSSSCG00000047027-ENSSSCG00000043072	ENSSSCG00000047027-ENSSSCG00000043072	snv
	13	176794774	T	A	0.524194	WZS01853-ZF3_153-sgRNACas9-KO-	control_CRISPR	somatic	non_coding_transcript_exon_variant	MODIFIER	ENSSSCG00000047238	ENSSSCG00000047238	snv
	17	60592309	T	C	0.495575	WZS01853-ZF3_153-sgRNACas9-KO-	control_CRISPR	somatic	intron_variant	MODIFIER	ENSSSCG00000050535	ENSSSCG00000050535	snv
	7	79836048	A	G	0.333333	WZS01853-ZF3_153-sgRNACas9-KO-	control_CRISPR	somatic	downstream_gene_variant	MODIFIER	ENSSSCG00000041227	ENSSSCG00000041227	snv
	9	85340607	G	A	0.520833	WZS01853-ZF3_153-sgRNACas9-KO-	control_CRISPR	somatic	intergenic_region	MODIFIER	ENSSSCG00000048170-CRPPA	ENSSSCG00000048170-ENSSSCG00000015358	snv
	8	8859396	G	A	0.546099	WZS01853-ZF3_153-sgRNACas9-KO-	control_CRISPR	somatic	intron_variant	MODIFIER	RAB28	ENSSSCG00000022358	snv
	1	125408424	C	A	0.371429	WZS01853-ZF3_153-sgRNACas9-KO-	control_CRISPR	somatic	intergenic_region	MODIFIER	ENSSSCG00000050164-ENSSSCG00000045481	ENSSSCG00000050164-ENSSSCG00000045481	snv
	9	4407222	C	T	0.166667	WZS01853-ZF3_153-sgRNACas9-KO-	control_CRISPR	somatic	downstream_gene_variant	MODIFIER	ENSSSCG00000034680	ENSSSCG00000034680	snv
	9	78922675	C	CA	0.550562	WZS01853-ZF3_153-sgRNACas9-KO-	control_CRISPR	somatic	upstream_gene_variant	MODIFIER	ENSSSCG00000046900	ENSSSCG00000046900	indel
	12	3901634	C	T	0.504673	WZS01853-ZF3_153-sgRNACas9-KO-	control_CRISPR	somatic	intron_variant	MODIFIER	TNRC6C	ENSSSCG00000034373	snv
	8	50974419	T	G	0.496403	WZS01853-ZF3_153-sgRNACas9-KO-	control_CRISPR	somatic	intron_variant	MODIFIER	FSTL5	ENSSSCG00000027183	snv
	1	249183220	C	T	0.538462	WZS01853-ZF3_153-sgRNACas9-KO-	control_CRISPR	somatic	intergenic_region	MODIFIER	ENSSSCG00000051392-ENSSSCG00000041167	ENSSSCG00000051392-ENSSSCG00000041167	snv
	6	57747392	G	A	0.478261	WZS01853-ZF3_153-sgRNACas9-KO-	control_CRISPR	somatic	downstream_gene_variant	MODIFIER	ENSSSCG00000037675	ENSSSCG00000037675	snv
	6	32946368	T	C	0.540323	WZS01853-ZF3_153-sgRNACas9-KO-	control_CRISPR	somatic	intergenic_region	MODIFIER	ENSSSCG00000042804-ENSSSCG00000042676	ENSSSCG00000042804-ENSSSCG00000042676	snv
	18	35513818	A	G	0.527473	WZS01853-ZF3_153-sgRNACas9-KO-	control_CRISPR	somatic	intron_variant	MODIFIER	ENSSSCG00000042796	ENSSSCG00000042796	snv
	2	107479910	C	G	0.427184	WZS01853-ZF3_153-sgRNACas9-KO-	control_CRISPR	somatic	intergenic_region	MODIFIER	ENSSSCG00000046316-ENSSSCG00000033364	ENSSSCG00000046316-ENSSSCG00000033364	snv
	5	79149441	G	T	0.532847	WZS01853-ZF3_153-sgRNACas9-KO-	control_CRISPR	somatic	downstream_gene_variant	MODIFIER	ENSSSCG00000048423	ENSSSCG00000048423	snv
	15	59459759	G	A	0.621849	WZS01853-ZF3_153-sgRNACas9-KO-	control_CRISPR	somatic	intron_variant	MODIFIER	AMMECR1L	ENSSSCG00000028633	snv
	5	40073116	G	A	0.464646	WZS01853-ZF3_153-sgRNACas9-KO-	control_CRISPR	somatic	intergenic_region	MODIFIER	OSBPL8-ENSSSCG00000026719	ENSSSCG00000027503-ENSSSCG00000026719	snv
	6	59519516	G	A	0.271429	WZS01853-ZF3_153-sgRNACas9-KO-	control_CRISPR	somatic	synonymous_variant	LOW	KMT5C	ENSSSCG00000035829	snv
	10	21339838	C	A	0.678161	WZS01853-ZF3_153-sgRNACas9-KO-	control_CRISPR	somatic	intergenic_region	MODIFIER	ENSSSCG00000042753-ENSSSCG00000041203	ENSSSCG00000042753-ENSSSCG00000041203	snv
	8	83150793	T	C	0.469799	WZS01853-ZF3_153-sgRNACas9-KO-	control_CRISPR	somatic	intergenic_region	MODIFIER	SMAD1-ENSSSCG00000044336	ENSSSCG00000009040-ENSSSCG00000044336	snv
	10	37587166	C	G	0.376623	WZS01853-ZF3_153-sgRNACas9-KO-	control_CRISPR	somatic	intergenic_region	MODIFIER	ENSSSCG00000044020-ENSSSCG00000040988	ENSSSCG00000044020-ENSSSCG00000040988	snv
	11	56448852	A	C	0.533981	WZS01853-ZF3_153-sgRNACas9-KO-	control_CRISPR	somatic	intergenic_region	MODIFIER	ENSSSCG00000042996-SLITRK6	ENSSSCG00000042996-ENSSSCG00000009486	snv
	3	105250409	AT	A	0.474576	WZS01853-ZF3_153-sgRNACas9-KO-	control_CRISPR	somatic	intergenic_region	MODIFIER	ENSSSCG00000044766-ENSSSCG00000044060	ENSSSCG00000044766-ENSSSCG00000044060	indel
	5	50722375	G	C	0.409449	WZS01853-ZF3_153-sgRNACas9-KO-	control_CRISPR	somatic	intergenic_region	MODIFIER	ENSSSCG00000043313-ETNK1	ENSSSCG00000043313-ENSSSCG00000039397	snv
	5	55510659	C	T	0.496296	WZS01853-ZF3_153-sgRNACas9-KO-	control_CRISPR	somatic	intergenic_region	MODIFIER	U6-U6	ENSSSCG00000040455-ENSSSCG00000035469	snv
	2	51880641	T	G	0.367713	WZS01853-ZF3_153-sgRNACas9-KO-	control_CRISPR	somatic	intergenic_region	MODIFIER	ENSSSCG00000043588-ENSSSCG00000026598	ENSSSCG00000043588-ENSSSCG00000026598	snv
	13	204314101	C	G	0.25	WZS01853-ZF3_153-sgRNACas9-KO-	control_CRISPR	somatic	upstream_gene_variant	MODIFIER	DSCAM	ENSSSCG00000012072	snv
	1	59707411	T	C	0.536232	WZS01853-ZF3_153-sgRNACas9-KO-	control_CRISPR	somatic	intergenic_region	MODIFIER	ENSSSCG00000048181-U2	ENSSSCG00000048181-ENSSSCG00000042748	snv
	1	177184302	G	T	0.482456	WZS01853-ZF3_153-sgRNACas9-KO-	control_CRISPR	somatic	intron_variant	MODIFIER	MDGA2	ENSSSCG00000005002	snv
	9	95968738	T	G	0.559055	WZS01853-ZF3_153-sgRNACas9-KO-	control_CRISPR	somatic	downstream_gene_variant	MODIFIER	SNORD29	ENSSSCG00000021268	snv
	13	195306566	AT	A	0.548077	WZS01853-ZF3_153-sgRNACas9-KO-	control_CRISPR	somatic	intergenic_region	MODIFIER	ENSSSCG00000050688-SCAF4	ENSSSCG00000050688-ENSSSCG00000021023	indel
	2	41915881	T	C	0.139535	WZS01853-ZF3_153-sgRNACas9-KO-	control_CRISPR	somatic	intron_variant	MODIFIER	PIK3C2A	ENSSSCG00000025406	snv
	5	36410033	A	G	0.489209	WZS01853-ZF3_153-sgRNACas9-KO-	control_CRISPR	somatic	intron_variant	MODIFIER	TRHDE	ENSSSCG00000000515	snv
	13	104033179	T	G	0.456693	WZS01853-ZF3_153-sgRNACas9-KO-	control_CRISPR	somatic	intergenic_region	MODIFIER	ENSSSCG00000037498-ENSSSCG00000045618	ENSSSCG00000037498-ENSSSCG00000045618	snv
	3	81513320	G	T	0.448276	WZS01853-ZF3_153-sgRNACas9-KO-	control_CRISPR	somatic	intergenic_region	MODIFIER	BCL11A-ssc-mir-9789	ENSSSCG00000008392-ENSSSCG00000038341	snv
	7	42221976	C	A	0.0618557	WZS01853-ZF3_153-sgRNACas9-KO-	control_CRISPR	somatic	intron_variant	MODIFIER	CD2AP	ENSSSCG00000030197	snv
	8	14605864	T	C	0.440367	WZS01853-ZF3_153-sgRNACas9-KO-	control_CRISPR	somatic	intergenic_region	MODIFIER	ENSSSCG00000047197-SLIT2	ENSSSCG00000047197-ENSSSCG00000008749	snv
	8	68027428	T	C	0.37037	WZS01853-ZF3_153-sgRNACas9-KO-	control_CRISPR	somatic	intron_variant	MODIFIER	SLC4A4	ENSSSCG00000008943	snv
	8	44108480	G	T	0.531034	WZS01853-ZF3_153-sgRNACas9-KO-	control_CRISPR	somatic	intergenic_region	MODIFIER	ENSSSCG00000045736-ENSSSCG00000051162	ENSSSCG00000045736-ENSSSCG00000051162	snv
	1	78241167	T	C	0.50625	WZS01853-ZF3_153-sgRNACas9-KO-	control_CRISPR	somatic	intergenic_region	MODIFIER	LAMA4-ENSSSCG00000050324	ENSSSCG00000004425-ENSSSCG00000050324	snv
	3	17813327	C	T	0.245283	WZS01853-ZF3_153-sgRNACas9-KO-	control_CRISPR	somatic	synonymous_variant	LOW	ZNF768	ENSSSCG00000023349	snv
	10	12961247	G	A	0.527027	WZS01853-ZF3_153-sgRNACas9-KO-	control_CRISPR	somatic	downstream_gene_variant	MODIFIER	CNIH3	ENSSSCG00000034972	snv
	15	131077353	C	A	0.361345	WZS01853-ZF3_153-sgRNACas9-KO-	control_CRISPR	somatic	intron_variant	MODIFIER	SLC16A14	ENSSSCG00000016260	snv
	13	98798167	GC	G	0.517241	WZS01853-ZF3_153-sgRNACas9-KO-	control_CRISPR	somatic	intergenic_region	MODIFIER	ENSSSCG00000042070-IQCJ	ENSSSCG00000042070-ENSSSCG00000011728	indel
	5	96867849	G	T	0.543046	WZS01853-ZF3_153-sgRNACas9-KO-	control_CRISPR	somatic	intron_variant	MODIFIER	LRRIQ1	ENSSSCG00000000934	snv
	4	116364303	C	A	0.411765	WZS01853-ZF3_153-sgRNACas9-KO-	control_CRISPR	somatic	intergenic_region	MODIFIER	ENSSSCG00000042916-OLFM3	ENSSSCG00000042916-ENSSSCG00000006858	snv
	13	36560834	C	A	0.53271	WZS01853-ZF3_153-sgRNACas9-KO-	control_CRISPR	somatic	intron_variant	MODIFIER	CACNA2D3	ENSSSCG00000027019	snv
	14	17470858	G	T	0.472603	WZS01853-ZF3_153-sgRNACas9-KO-	control_CRISPR	somatic	intron_variant	MODIFIER	GALNTL6	ENSSSCG00000021805	snv
	16	1361369	A	C	0.482143	WZS01853-ZF3_153-sgRNACas9-KO-	control_CRISPR	somatic	intron_variant	MODIFIER	CTNND2	ENSSSCG00000016780	snv
	17	23047839	T	C	0.46875	WZS01853-ZF3_153-sgRNACas9-KO-	control_CRISPR	somatic	intron_variant	MODIFIER	MACROD2	ENSSSCG00000030112	snv
	16	3986377	A	C	0.605263	WZS01853-ZF3_153-sgRNACas9-KO-	control_CRISPR	somatic	intron_variant	MODIFIER	OTULINL	ENSSSCG00000016782	snv
	3	10386813	TA	T	0.508621	WZS01853-ZF3_153-sgRNACas9-KO-	control_CRISPR	somatic	downstream_gene_variant	MODIFIER	CCL26	ENSSSCG00000039874	indel
	13	138759927	TG	T	0.333333	WZS01853-ZF3_153-sgRNACas9-KO-	control_CRISPR	somatic	intron_variant	MODIFIER	GOLGB1	ENSSSCG00000011882	indel
	18	27973422	C	G	0.621429	WZS01853-ZF3_153-sgRNACas9-KO-	control_CRISPR	somatic	intron_variant	MODIFIER	ENSSSCG00000035981	ENSSSCG00000035981	snv
	18	23138801	G	A	0.605042	WZS01853-ZF3_153-sgRNACas9-KO-	control_CRISPR	somatic	intergenic_region	MODIFIER	U6-ENSSSCG00000041528	ENSSSCG00000037917-ENSSSCG00000041528	snv
	9	122010793	T	C	0.437956	WZS01853-ZF3_153-sgRNACas9-KO-	control_CRISPR	somatic	intron_variant	MODIFIER	ACBD6	ENSSSCG00000015534	snv
	11	59717776	T	C	0.569106	WZS01853-ZF3_153-sgRNACas9-KO-	control_CRISPR	somatic	upstream_gene_variant	MODIFIER	ENSSSCG00000043859	ENSSSCG00000043859	snv
	15	12825820	T	C	0.366412	WZS01853-ZF3_153-sgRNACas9-KO-	control_CRISPR	somatic	intergenic_region	MODIFIER	U6-NXPH2	ENSSSCG00000032571-ENSSSCG00000040715	snv
	7	66617754	T	C	0.436364	WZS01853-ZF3_153-sgRNACas9-KO-	control_CRISPR	somatic	intron_variant	MODIFIER	NPAS3	ENSSSCG00000001964	snv
	1	210621208	T	G	0.460432	WZS01853-ZF3_153-sgRNACas9-KO-	control_CRISPR	somatic	intergenic_region	MODIFIER	ENSSSCG00000048974-ENSSSCG00000047464	ENSSSCG00000048974-ENSSSCG00000047464	snv
	15	35485718	A	T	0.529851	WZS01853-ZF3_153-sgRNACas9-KO-	control_CRISPR	somatic	intergenic_region	MODIFIER	ENSSSCG00000041369-ENSSSCG00000049782	ENSSSCG00000041369-ENSSSCG00000049782	snv
	3	28304572	A	C	0.260504	WZS01853-ZF3_153-sgRNACas9-KO-	control_CRISPR	somatic	non_coding_transcript_exon_variant	MODIFIER	ENSSSCG00000007873	ENSSSCG00000007873	snv
	13	58947254	T	C	0.559055	WZS01853-ZF3_153-sgRNACas9-KO-	control_CRISPR	somatic	intergenic_region	MODIFIER	ENSSSCG00000045742-ENSSSCG00000050505	ENSSSCG00000045742-ENSSSCG00000050505	snv
	13	120212478	G	T	0.516949	WZS01853-ZF3_153-sgRNACas9-KO-	control_CRISPR	somatic	intergenic_region	MODIFIER	ENSSSCG00000037596-ENSSSCG00000050837	ENSSSCG00000037596-ENSSSCG00000050837	snv
	9	94765742	A	G	0.492754	WZS01853-ZF3_153-sgRNACas9-KO-	control_CRISPR	somatic	intergenic_region	MODIFIER	ENSSSCG00000042783-U6	ENSSSCG00000042783-ENSSSCG00000033088	snv
	4	94020921	A	C	0.421053	WZS01853-ZF3_153-sgRNACas9-KO-	control_CRISPR	somatic	intron_variant	MODIFIER	SSR2	ENSSSCG00000006501	snv
	16	56254365	T	G	0.566038	WZS01853-ZF3_153-sgRNACas9-KO-	control_CRISPR	somatic	intron_variant	MODIFIER	TENM2	ENSSSCG00000017018	snv
	12	9838281	C	T	0.22973	WZS01853-ZF3_153-sgRNACas9-KO-	control_CRISPR	somatic	intergenic_region	MODIFIER	ENSSSCG00000048915-ENSSSCG00000043713	ENSSSCG00000048915-ENSSSCG00000043713	snv
	6	76538684	A	G	0.476562	WZS01853-ZF3_153-sgRNACas9-KO-	control_CRISPR	somatic	intergenic_region	MODIFIER	ACTL8-ENSSSCG00000043698	ENSSSCG00000024062-ENSSSCG00000043698	snv
	4	12399937	C	T	0.493506	WZS01853-ZF3_153-sgRNACas9-KO-	control_CRISPR	somatic	upstream_gene_variant	MODIFIER	ENSSSCG00000049509	ENSSSCG00000049509	snv
	8	67536434	G	T	0.689655	WZS01853-ZF3_153-sgRNACas9-KO-	control_CRISPR	somatic	intron_variant	MODIFIER	RUFY3	ENSSSCG00000025514	snv
	6	116851656	G	C	0.402299	WZS01853-ZF3_153-sgRNACas9-KO-	control_CRISPR	somatic	intron_variant	MODIFIER	CCDC178	ENSSSCG00000038703	snv
	11	57135218	A	G	0.48	WZS01853-ZF3_153-sgRNACas9-KO-	control_CRISPR	somatic	intergenic_region	MODIFIER	SLITRK6-ENSSSCG00000033995	ENSSSCG00000009486-ENSSSCG00000033995	snv
	17	45989882	C	T	0.2	WZS01853-ZF3_153-sgRNACas9-KO-	control_CRISPR	somatic	intron_variant	MODIFIER	ENSSSCG00000051590	ENSSSCG00000051590	snv
	15	26212628	A	C	0.530435	WZS01853-ZF3_153-sgRNACas9-KO-	control_CRISPR	somatic	intergenic_region	MODIFIER	ENSSSCG00000026916-ENSSSCG00000042495	ENSSSCG00000026916-ENSSSCG00000042495	snv
	16	74707096	T	G	0.453782	WZS01853-ZF3_153-sgRNACas9-KO-	control_CRISPR	somatic	intergenic_region	MODIFIER	ENSSSCG00000041001-ENSSSCG00000044516	ENSSSCG00000041001-ENSSSCG00000044516	snv
	8	61536588	G	T	0.503759	WZS01853-ZF3_153-sgRNACas9-KO-	control_CRISPR	somatic	intergenic_region	MODIFIER	ENSSSCG00000031193-ENSSSCG00000047276	ENSSSCG00000031193-ENSSSCG00000047276	snv
	10	1547682	CT	C	0.516667	WZS01853-ZF3_153-sgRNACas9-KO-	control_CRISPR	somatic	downstream_gene_variant	MODIFIER	ENSSSCG00000045570	ENSSSCG00000045570	indel
	3	33067015	T	C	0.466019	WZS01853-ZF3_153-sgRNACas9-KO-	control_CRISPR	somatic	intron_variant	MODIFIER	GRIN2A	ENSSSCG00000031290	snv
	10	53289632	C	G	0.494382	WZS01853-ZF3_153-sgRNACas9-KO-	control_CRISPR	somatic	intron_variant	MODIFIER	MLLT10	ENSSSCG00000011085	snv
	2	110014856	A	C	0.434783	WZS01853-ZF3_153-sgRNACas9-KO-	control_CRISPR	somatic	intergenic_region	MODIFIER	ENSSSCG00000043979-U6	ENSSSCG00000043979-ENSSSCG00000023111	snv
	7	44259500	T	TC	0.609589	WZS01853-ZF3_153-sgRNACas9-KO-	control_CRISPR	somatic	intergenic_region	MODIFIER	ENSSSCG00000036460-TFAP2D	ENSSSCG00000036460-ENSSSCG00000001744	indel
	13	163588104	G	C	0.538462	WZS01853-ZF3_153-sgRNACas9-KO-	control_CRISPR	somatic	intergenic_region	MODIFIER	EPHA6-U6	ENSSSCG00000033898-ENSSSCG00000026634	snv
	10	34011810	G	T	0.489583	WZS01853-ZF3_153-sgRNACas9-KO-	control_CRISPR	somatic	intergenic_region	MODIFIER	ACO1-ENSSSCG00000043981	ENSSSCG00000023807-ENSSSCG00000043981	snv
	1	199382181	T	G	0.548387	WZS01853-ZF3_153-sgRNACas9-KO-	control_CRISPR	somatic	intergenic_region	MODIFIER	ENSSSCG00000042911-ENSSSCG00000042598	ENSSSCG00000042911-ENSSSCG00000042598	snv
	13	80334083	AT	A	0.50495	WZS01853-ZF3_153-sgRNACas9-KO-	control_CRISPR	somatic	intron_variant	MODIFIER	RBP2	ENSSSCG00000011663	indel
	1	258499716	C	G	0.442953	WZS01853-ZF3_153-sgRNACas9-KO-	control_CRISPR	somatic	downstream_gene_variant	MODIFIER	ENSSSCG00000044379	ENSSSCG00000044379	snv
	2	23336312	C	T	0.560606	WZS01853-ZF3_153-sgRNACas9-KO-	control_CRISPR	somatic	intergenic_region	MODIFIER	ENSSSCG00000050877-ENSSSCG00000045070	ENSSSCG00000050877-ENSSSCG00000045070	snv
	4	4431758	G	A	0.438017	WZS01853-ZF3_153-sgRNACas9-KO-	control_CRISPR	somatic	intron_variant	MODIFIER	FAM135B	ENSSSCG00000005939	snv
	16	3245835	G	C	0.491935	WZS01853-ZF3_153-sgRNACas9-KO-	control_CRISPR	somatic	intron_variant	MODIFIER	DNAH5	ENSSSCG00000032827	snv
	14	3348313	T	A	0.52439	WZS01853-ZF3_153-sgRNACas9-KO-	control_CRISPR	somatic	intron_variant	MODIFIER	ENSSSCG00000033204	ENSSSCG00000033204	snv
	6	118027753	G	GA	0.381579	WZS01853-ZF3_153-sgRNACas9-KO-	control_CRISPR	somatic	intron_variant	MODIFIER	NOL4	ENSSSCG00000003737	indel
	15	31268031	T	C	0.345133	WZS01853-ZF3_153-sgRNACas9-KO-	control_CRISPR	somatic	intron_variant	MODIFIER	EPB41L5	ENSSSCG00000039185	snv
	8	136628631	G	T	0.621429	WZS01853-ZF3_153-sgRNACas9-KO-	control_CRISPR	somatic	intron_variant	MODIFIER	ENSSSCG00000046258	ENSSSCG00000046258	snv
	4	5713525	T	C	0.413043	WZS01853-ZF3_153-sgRNACas9-KO-	control_CRISPR	somatic	intergenic_region	MODIFIER	ENSSSCG00000044937-ENSSSCG00000049175	ENSSSCG00000044937-ENSSSCG00000049175	snv
	2	110019194	TGGTCTTATATTTA	T	0.409836	WZS01853-ZF3_153-sgRNACas9-KO-	control_CRISPR	somatic	intergenic_region	MODIFIER	ENSSSCG00000043979-U6	ENSSSCG00000043979-ENSSSCG00000023111	indel
	6	89103783	T	C	0.479532	WZS01853-ZF3_153-sgRNACas9-KO-	control_CRISPR	somatic	intron_variant	MODIFIER	YARS1	ENSSSCG00000030369	snv
	1	212297664	A	G	0.226891	WZS01853-ZF3_153-sgRNACas9-KO-	control_CRISPR	somatic	intergenic_region	MODIFIER	ENSSSCG00000048126-ENSSSCG00000043945	ENSSSCG00000048126-ENSSSCG00000043945	snv
	16	1571656	G	A	0.472	WZS01853-ZF3_153-sgRNACas9-KO-	control_CRISPR	somatic	intergenic_region	MODIFIER	CTNND2-ENSSSCG00000050328	ENSSSCG00000016780-ENSSSCG00000050328	snv
	2	73287333	T	C	0.321637	WZS01853-ZF3_153-sgRNACas9-KO-	control_CRISPR	somatic	3_prime_UTR_variant	MODIFIER	HSD11B1L	ENSSSCG00000030546	snv
	17	2690225	G	A	0.392523	WZS01853-ZF3_153-sgRNACas9-KO-	control_CRISPR	somatic	intron_variant	MODIFIER	SGCZ	ENSSSCG00000038257	snv
	13	164293304	A	C	0.48062	WZS01853-ZF3_153-sgRNACas9-KO-	control_CRISPR	somatic	intergenic_region	MODIFIER	U6-ENSSSCG00000045741	ENSSSCG00000026634-ENSSSCG00000045741	snv
	7	18200047	G	GA	0.45679	WZS01853-ZF3_153-sgRNACas9-KO-	control_CRISPR	somatic	intergenic_region	MODIFIER	ENSSSCG00000047111-ENSSSCG00000046616	ENSSSCG00000047111-ENSSSCG00000046616	indel
	8	123536474	C	G	0.466667	WZS01853-ZF3_153-sgRNACas9-KO-	control_CRISPR	somatic	intron_variant	MODIFIER	ENSSSCG00000048784	ENSSSCG00000048784	snv
	6	170102237	T	G	0.513699	WZS01853-ZF3_153-sgRNACas9-KO-	control_CRISPR	somatic	intron_variant	MODIFIER	SCMH1	ENSSSCG00000003971	snv
	10	44748592	T	A	0.550847	WZS01853-ZF3_153-sgRNACas9-KO-	control_CRISPR	somatic	intron_variant	MODIFIER	CACNB2	ENSSSCG00000011040	snv
	10	44667103	C	A	0.554622	WZS01853-ZF3_153-sgRNACas9-KO-	control_CRISPR	somatic	intron_variant	MODIFIER	CACNB2	ENSSSCG00000011040	snv
	2	110553392	A	G	0.524691	WZS01853-ZF3_153-sgRNACas9-KO-	control_CRISPR	somatic	intergenic_region	MODIFIER	ENSSSCG00000046742-ENSSSCG00000049953	ENSSSCG00000046742-ENSSSCG00000049953	snv
	9	99791090	A	G	0.489051	WZS01853-ZF3_153-sgRNACas9-KO-	control_CRISPR	somatic	intergenic_region	MODIFIER	CD36-GNAT3	ENSSSCG00000015405-ENSSSCG00000015406	snv
	16	58775992	T	C	0.59542	WZS01853-ZF3_153-sgRNACas9-KO-	control_CRISPR	somatic	intergenic_region	MODIFIER	ENSSSCG00000047908-ENSSSCG00000046048	ENSSSCG00000047908-ENSSSCG00000046048	snv
	13	34165725	G	C	0.18	WZS01853-ZF3_153-sgRNACas9-KO-	control_CRISPR	somatic	intergenic_region	MODIFIER	ENSSSCG00000023325-POC1A	ENSSSCG00000023325-ENSSSCG00000011426	snv
	9	5035735	G	A	0.234899	WZS01853-ZF3_153-sgRNACas9-KO-	control_CRISPR	somatic	downstream_gene_variant	MODIFIER	ENSSSCG00000032783	ENSSSCG00000032783	snv
	16	75499627	A	G	0.568182	WZS01853-ZF3_153-sgRNACas9-KO-	control_CRISPR	somatic	intergenic_region	MODIFIER	UBE2QL1-ENSSSCG00000017106	ENSSSCG00000035825-ENSSSCG00000017106	snv
	7	104728846	G	T	0.428571	WZS01853-ZF3_153-sgRNACas9-KO-	control_CRISPR	somatic	intergenic_region	MODIFIER	ENSSSCG00000049060-ENSSSCG00000047447	ENSSSCG00000049060-ENSSSCG00000047447	snv
	9	39521353	C	T	0.409836	WZS01853-ZF3_153-sgRNACas9-KO-	control_CRISPR	somatic	upstream_gene_variant	MODIFIER	PPP2R1B	ENSSSCG00000029538	snv
	4	128573942	A	G	0.512	WZS01853-ZF3_153-sgRNACas9-KO-	control_CRISPR	somatic	intergenic_region	MODIFIER	ENSSSCG00000046583-ENSSSCG00000042877	ENSSSCG00000046583-ENSSSCG00000042877	snv
	13	44777420	C	G	0.51773	WZS01853-ZF3_153-sgRNACas9-KO-	control_CRISPR	somatic	intergenic_region	MODIFIER	ENSSSCG00000011489-SYNPR	ENSSSCG00000011489-ENSSSCG00000027617	snv
	8	66610612	T	C	0.516393	WZS01853-ZF3_153-sgRNACas9-KO-	control_CRISPR	somatic	intron_variant	MODIFIER	ENSSSCG00000034976	ENSSSCG00000034976	snv
	14	97455738	A	C	0.558824	WZS01853-ZF3_153-sgRNACas9-KO-	control_CRISPR	somatic	intergenic_region	MODIFIER	MBL2-DKK1	ENSSSCG00000010427-ENSSSCG00000010428	snv
	15	103165697	G	A	0.62037	WZS01853-ZF3_153-sgRNACas9-KO-	control_CRISPR	somatic	non_coding_transcript_exon_variant	MODIFIER	ENSSSCG00000042808	ENSSSCG00000042808	snv
	9	115697911	GA	G	0.564815	WZS01853-ZF3_153-sgRNACas9-KO-	control_CRISPR	somatic	intron_variant	MODIFIER	TNFSF4	ENSSSCG00000015488	indel
	9	41274632	G	C	0.512397	WZS01853-ZF3_153-sgRNACas9-KO-	control_CRISPR	somatic	intergenic_region	MODIFIER	DRD2-U6	ENSSSCG00000015048-ENSSSCG00000020486	snv
	16	14969813	T	C	0.430108	WZS01853-ZF3_153-sgRNACas9-KO-	control_CRISPR	somatic	intergenic_region	MODIFIER	ENSSSCG00000043773-U6	ENSSSCG00000043773-ENSSSCG00000018997	snv
	11	27580998	C	A	0.426829	WZS01853-ZF3_153-sgRNACas9-KO-	control_CRISPR	somatic	intergenic_region	MODIFIER	U6-ENSSSCG00000047629	ENSSSCG00000019244-ENSSSCG00000047629	snv
	16	15396896	T	C	0.470588	WZS01853-ZF3_153-sgRNACas9-KO-	control_CRISPR	somatic	intergenic_region	MODIFIER	ENSSSCG00000047519-ENSSSCG00000033328	ENSSSCG00000047519-ENSSSCG00000033328	snv
	16	74530874	T	G	0.474747	WZS01853-ZF3_153-sgRNACas9-KO-	control_CRISPR	somatic	intergenic_region	MODIFIER	ADCY2-ENSSSCG00000048006	ENSSSCG00000017101-ENSSSCG00000048006	snv
	6	139504279	T	C	0.613208	WZS01853-ZF3_153-sgRNACas9-KO-	control_CRISPR	somatic	intergenic_region	MODIFIER	LRRIQ3-ENSSSCG00000051303	ENSSSCG00000003784-ENSSSCG00000051303	snv
	1	30545783	T	C	0.570312	WZS01853-ZF3_153-sgRNACas9-KO-	control_CRISPR	somatic	intron_variant	MODIFIER	EYA4	ENSSSCG00000034139	snv
	10	5590012	G	T	0.492063	WZS01853-ZF3_153-sgRNACas9-KO-	control_CRISPR	somatic	intergenic_region	MODIFIER	U6-ENSSSCG00000049015	ENSSSCG00000036162-ENSSSCG00000049015	snv
	13	37492087	C	T	0.468085	WZS01853-ZF3_153-sgRNACas9-KO-	control_CRISPR	somatic	intron_variant	MODIFIER	ERC2	ENSSSCG00000024417	snv
	15	134906165	G	GT	0.376344	WZS01853-ZF3_153-sgRNACas9-KO-	control_CRISPR	somatic	intergenic_region	MODIFIER	ENSSSCG00000043599-ENSSSCG00000046337	ENSSSCG00000043599-ENSSSCG00000046337	indel
	1	46809741	A	G	0.490566	WZS01853-ZF3_153-sgRNACas9-KO-	control_CRISPR	somatic	intergenic_region	MODIFIER	ENSSSCG00000050391-U6	ENSSSCG00000050391-ENSSSCG00000020480	snv
	1	192376355	G	T	0.48227	WZS01853-ZF3_153-sgRNACas9-KO-	control_CRISPR	somatic	intergenic_region	MODIFIER	ENSSSCG00000044241-ENSSSCG00000050818	ENSSSCG00000044241-ENSSSCG00000050818	snv
	1	63106537	A	G	0.451327	WZS01853-ZF3_153-sgRNACas9-KO-	control_CRISPR	somatic	intergenic_region	MODIFIER	MANEA-ENSSSCG00000049406	ENSSSCG00000035648-ENSSSCG00000049406	snv
	4	126231573	A	G	0.48	WZS01853-ZF3_153-sgRNACas9-KO-	control_CRISPR	somatic	intergenic_region	MODIFIER	U6-ENSSSCG00000043214	ENSSSCG00000023240-ENSSSCG00000043214	snv
	4	65154790	G	A	0.533333	WZS01853-ZF3_153-sgRNACas9-KO-	control_CRISPR	somatic	intron_variant	MODIFIER	NCOA2	ENSSSCG00000006194	snv
	6	138807185	A	C	0.379032	WZS01853-ZF3_153-sgRNACas9-KO-	control_CRISPR	somatic	intron_variant	MODIFIER	ENSSSCG00000040109	ENSSSCG00000040109	snv
	15	51989796	A	C	0.6375	WZS01853-ZF3_153-sgRNACas9-KO-	control_CRISPR	somatic	intergenic_region	MODIFIER	ENSSSCG00000049652-ENSSSCG00000036767	ENSSSCG00000049652-ENSSSCG00000036767	snv
	14	39790085	C	CT	0.510417	WZS01853-ZF3_153-sgRNACas9-KO-	control_CRISPR	somatic	intron_variant	MODIFIER	TMEM116	ENSSSCG00000009893	indel
	16	16308667	C	A	0.689655	WZS01853-ZF3_153-sgRNACas9-KO-	control_CRISPR	somatic	intergenic_region	MODIFIER	ENSSSCG00000043720-ENSSSCG00000042969	ENSSSCG00000043720-ENSSSCG00000042969	snv
	6	125791415	T	A	0.506944	WZS01853-ZF3_153-sgRNACas9-KO-	control_CRISPR	somatic	intergenic_region	MODIFIER	ENSSSCG00000038382-PIK3C3	ENSSSCG00000038382-ENSSSCG00000003749	snv
	16	48798025	G	T	0.575758	WZS01853-ZF3_153-sgRNACas9-KO-	control_CRISPR	somatic	intron_variant	MODIFIER	ZNF366	ENSSSCG00000016976	snv
	13	184726540	G	C	0.569231	WZS01853-ZF3_153-sgRNACas9-KO-	control_CRISPR	somatic	intergenic_region	MODIFIER	U6-NCAM2	ENSSSCG00000018241-ENSSSCG00000012020	snv
	13	101480905	A	C	0.517007	WZS01853-ZF3_153-sgRNACas9-KO-	control_CRISPR	somatic	intergenic_region	MODIFIER	OTOL1-ENSSSCG00000045945	ENSSSCG00000022248-ENSSSCG00000045945	snv
	2	145499798	T	A	0.252101	WZS01853-ZF3_153-sgRNACas9-KO-	control_CRISPR	somatic	intergenic_region	MODIFIER	ENSSSCG00000048807-ENSSSCG00000043421	ENSSSCG00000048807-ENSSSCG00000043421	snv
	7	97443280	A	AT	0.508929	WZS01853-ZF3_153-sgRNACas9-KO-	control_CRISPR	somatic	intron_variant	MODIFIER	ENSSSCG00000051226	ENSSSCG00000051226	indel
	8	44442980	G	A	0.495726	WZS01853-ZF3_153-sgRNACas9-KO-	control_CRISPR	somatic	intergenic_region	MODIFIER	ENSSSCG00000048616-GUCY1A1	ENSSSCG00000048616-ENSSSCG00000008866	snv
	1	73939734	A	C	0.505747	WZS01853-ZF3_153-sgRNACas9-KO-	control_CRISPR	somatic	intron_variant	MODIFIER	SCML4	ENSSSCG00000033392	snv
	13	86077754	T	C	0.394495	WZS01853-ZF3_153-sgRNACas9-KO-	control_CRISPR	somatic	intergenic_region	MODIFIER	ENSSSCG00000045955-U6	ENSSSCG00000045955-ENSSSCG00000031862	snv
	6	168107952	A	G	0.266667	WZS01853-ZF3_153-sgRNACas9-KO-	control_CRISPR	somatic	intron_variant	MODIFIER	ENSSSCG00000003957	ENSSSCG00000003957	snv
	10	5372205	C	CT	0.484848	WZS01853-ZF3_153-sgRNACas9-KO-	control_CRISPR	somatic	intergenic_region	MODIFIER	U6-ENSSSCG00000049015	ENSSSCG00000036162-ENSSSCG00000049015	indel
	8	21113866	T	G	0.533898	WZS01853-ZF3_153-sgRNACas9-KO-	control_CRISPR	somatic	intergenic_region	MODIFIER	ENSSSCG00000051729-ENSSSCG00000045684	ENSSSCG00000051729-ENSSSCG00000045684	snv
	3	47074052	G	C	0.444444	WZS01853-ZF3_153-sgRNACas9-KO-	control_CRISPR	somatic	downstream_gene_variant	MODIFIER	ASTL	ENSSSCG00000008126	snv
	10	6860625	G	A	0.502994	WZS01853-ZF3_153-sgRNACas9-KO-	control_CRISPR	somatic	upstream_gene_variant	MODIFIER	ENSSSCG00000050713	ENSSSCG00000050713	snv
	5	38653044	G	A	0.454545	WZS01853-ZF3_153-sgRNACas9-KO-	control_CRISPR	somatic	intron_variant	MODIFIER	GLIPR1L1	ENSSSCG00000022055	snv
	14	53786254	TA	T	0.504202	WZS01853-ZF3_153-sgRNACas9-KO-	control_CRISPR	somatic	intron_variant	MODIFIER	RYR2	ENSSSCG00000010142	indel
	13	155066602	G	A	0.54717	WZS01853-ZF3_153-sgRNACas9-KO-	control_CRISPR	somatic	intergenic_region	MODIFIER	ENSSSCG00000043607-ENSSSCG00000046831	ENSSSCG00000043607-ENSSSCG00000046831	snv
	15	40289074	G	T	0.544444	WZS01853-ZF3_153-sgRNACas9-KO-	control_CRISPR	somatic	intergenic_region	MODIFIER	ENSSSCG00000049401-ENSSSCG00000045939	ENSSSCG00000049401-ENSSSCG00000045939	snv
	5	84664022	G	T	0.477778	WZS01853-ZF3_153-sgRNACas9-KO-	control_CRISPR	somatic	intron_variant	MODIFIER	ANKS1B	ENSSSCG00000022083	snv
	3	89888357	G	A	0.475	WZS01853-ZF3_153-sgRNACas9-KO-	control_CRISPR	somatic	intron_variant	MODIFIER	NRXN1	ENSSSCG00000026180	snv
	11	65205643	C	A	0.495238	WZS01853-ZF3_153-sgRNACas9-KO-	control_CRISPR	somatic	upstream_gene_variant	MODIFIER	ENSSSCG00000009501	ENSSSCG00000009501	snv
	2	20439885	A	G	0.477941	WZS01853-ZF3_153-sgRNACas9-KO-	control_CRISPR	somatic	intergenic_region	MODIFIER	ENSSSCG00000047142-ENSSSCG00000045282	ENSSSCG00000047142-ENSSSCG00000045282	snv
	9	128561483	T	C	0.496183	WZS01853-ZF3_153-sgRNACas9-KO-	control_CRISPR	somatic	intron_variant	MODIFIER	KCNK2	ENSSSCG00000023451	snv
	15	84539305	A	G	0.503185	WZS01853-ZF3_153-sgRNACas9-KO-	control_CRISPR	somatic	intron_variant	MODIFIER	ENSSSCG00000016002	ENSSSCG00000016002	snv
	18	175173	A	G	0.473214	WZS01853-ZF3_153-sgRNACas9-KO-	control_CRISPR	somatic	intergenic_region	MODIFIER	ENSSSCG00000044315-ENSSSCG00000046530	ENSSSCG00000044315-ENSSSCG00000046530	snv
	12	7199323	A	G	0.453901	WZS01853-ZF3_153-sgRNACas9-KO-	control_CRISPR	somatic	intergenic_region	MODIFIER	ENSSSCG00000045799-ENSSSCG00000046071	ENSSSCG00000045799-ENSSSCG00000046071	snv
	1	101304616	T	C	0.487179	WZS01853-ZF3_153-sgRNACas9-KO-	control_CRISPR	somatic	intergenic_region	MODIFIER	ENSSSCG00000049543-ENSSSCG00000051201	ENSSSCG00000049543-ENSSSCG00000051201	snv
	8	66804798	G	A	0.566667	WZS01853-ZF3_153-sgRNACas9-KO-	control_CRISPR	somatic	intergenic_region	MODIFIER	ENSSSCG00000039518-ENSSSCG00000039341	ENSSSCG00000039518-ENSSSCG00000039341	snv
	14	98782165	T	G	0.516129	WZS01853-ZF3_153-sgRNACas9-KO-	control_CRISPR	somatic	intron_variant	MODIFIER	PRKG1	ENSSSCG00000010429	snv
	3	56625762	C	T	0.4	WZS01853-ZF3_153-sgRNACas9-KO-	control_CRISPR	somatic	downstream_gene_variant	MODIFIER	COX5B	ENSSSCG00000008195	snv
	15	27258036	A	C	0.55	WZS01853-ZF3_153-sgRNACas9-KO-	control_CRISPR	somatic	intron_variant	MODIFIER	CNTNAP5	ENSSSCG00000015726	snv
	13	172259267	G	T	0.442748	WZS01853-ZF3_153-sgRNACas9-KO-	control_CRISPR	somatic	intergenic_region	MODIFIER	ENSSSCG00000050907-ENSSSCG00000029127	ENSSSCG00000050907-ENSSSCG00000029127	snv
	4	53962439	G	T	0.504425	WZS01853-ZF3_153-sgRNACas9-KO-	control_CRISPR	somatic	intergenic_region	MODIFIER	ENSSSCG00000048719-ENSSSCG00000045469	ENSSSCG00000048719-ENSSSCG00000045469	snv
	8	94593984	G	T	0.491071	WZS01853-ZF3_153-sgRNACas9-KO-	control_CRISPR	somatic	intergenic_region	MODIFIER	ENSSSCG00000048109-ENSSSCG00000042298	ENSSSCG00000048109-ENSSSCG00000042298	snv
	16	79735322	G	A	0.495652	WZS01853-ZF3_153-sgRNACas9-KO-	control_CRISPR	somatic	intron_variant	MODIFIER	ENSSSCG00000032843	ENSSSCG00000032843	snv
	9	45127811	G	A	0.451327	WZS01853-ZF3_153-sgRNACas9-KO-	control_CRISPR	somatic	intron_variant	MODIFIER	DSCAML1	ENSSSCG00000015082	snv
	14	128309398	C	T	0.5	WZS01853-ZF3_153-sgRNACas9-KO-	control_CRISPR	somatic	intron_variant	MODIFIER	ENSSSCG00000042582	ENSSSCG00000042582	snv
	6	27111401	A	C	0.530303	WZS01853-ZF3_153-sgRNACas9-KO-	control_CRISPR	somatic	intron_variant	MODIFIER	CDH5	ENSSSCG00000035772	snv
	6	137345831	G	T	0.515337	WZS01853-ZF3_153-sgRNACas9-KO-	control_CRISPR	somatic	intergenic_region	MODIFIER	U6-ASB17	ENSSSCG00000024120-ENSSSCG00000031522	snv
	13	142220347	G	T	0.507463	WZS01853-ZF3_153-sgRNACas9-KO-	control_CRISPR	somatic	intergenic_region	MODIFIER	ENSSSCG00000047451-ENSSSCG00000042482	ENSSSCG00000047451-ENSSSCG00000042482	snv
	7	6345120	C	A	0.398496	WZS01853-ZF3_153-sgRNACas9-KO-	control_CRISPR	somatic	intergenic_region	MODIFIER	ENSSSCG00000041210-ssc-mir-9802	ENSSSCG00000041210-ENSSSCG00000039534	snv
	8	103035951	T	A	0.444444	WZS01853-ZF3_153-sgRNACas9-KO-	control_CRISPR	somatic	upstream_gene_variant	MODIFIER	ENSSSCG00000035060	ENSSSCG00000035060	snv
	10	6048434	T	C	0.490066	WZS01853-ZF3_153-sgRNACas9-KO-	control_CRISPR	somatic	intergenic_region	MODIFIER	KCTD3-ENSSSCG00000038066	ENSSSCG00000010811-ENSSSCG00000038066	snv
	14	3712601	T	A	0.495413	WZS01853-ZF3_153-sgRNACas9-KO-	control_CRISPR	somatic	intergenic_region	MODIFIER	ENSSSCG00000033204-ENSSSCG00000047639	ENSSSCG00000033204-ENSSSCG00000047639	snv
	13	172290381	AG	A	0.557692	WZS01853-ZF3_153-sgRNACas9-KO-	control_CRISPR	somatic	intergenic_region	MODIFIER	ENSSSCG00000050907-ENSSSCG00000029127	ENSSSCG00000050907-ENSSSCG00000029127	indel
	8	123781066	C	A	0.475806	WZS01853-ZF3_153-sgRNACas9-KO-	control_CRISPR	somatic	intergenic_region	MODIFIER	ENSSSCG00000045170-ENSSSCG00000046219	ENSSSCG00000045170-ENSSSCG00000046219	snv
	5	26625579	C	A	0.525547	WZS01853-ZF3_153-sgRNACas9-KO-	control_CRISPR	somatic	intergenic_region	MODIFIER	TAFA2-ENSSSCG00000041120	ENSSSCG00000034686-ENSSSCG00000041120	snv
	18	39649371	T	C	0.558282	WZS01853-ZF3_153-sgRNACas9-KO-	control_CRISPR	somatic	intron_variant	MODIFIER	BMPER	ENSSSCG00000016665	snv
	2	14296558	G	T	0.305882	WZS01853-ZF3_153-sgRNACas9-KO-	control_CRISPR	somatic	intergenic_region	MODIFIER	ENSSSCG00000046254-ENSSSCG00000046306	ENSSSCG00000046254-ENSSSCG00000046306	snv
	14	52725222	A	C	0.55	WZS01853-ZF3_153-sgRNACas9-KO-	control_CRISPR	somatic	intergenic_region	MODIFIER	ENSSSCG00000050944-ENSSSCG00000041314	ENSSSCG00000050944-ENSSSCG00000041314	snv
	1	125908386	A	C	0.468085	WZS01853-ZF3_153-sgRNACas9-KO-	control_CRISPR	somatic	intergenic_region	MODIFIER	ENSSSCG00000044345-ENSSSCG00000004666	ENSSSCG00000044345-ENSSSCG00000004666	snv
	8	74601210	A	G	0.575758	WZS01853-ZF3_153-sgRNACas9-KO-	control_CRISPR	somatic	intron_variant	MODIFIER	FGB	ENSSSCG00000008997	snv
	11	72473298	G	A	0.609023	WZS01853-ZF3_153-sgRNACas9-KO-	control_CRISPR	somatic	intergenic_region	MODIFIER	ENSSSCG00000044362-ENSSSCG00000048931	ENSSSCG00000044362-ENSSSCG00000048931	snv
	15	139123721	G	A	0.287671	WZS01853-ZF3_153-sgRNACas9-KO-	control_CRISPR	somatic	missense_variant	MODERATE	ENSSSCG00000051581	ENSSSCG00000051581	snv
	6	18281036	C	A	0.531532	WZS01853-ZF3_153-sgRNACas9-KO-	control_CRISPR	somatic	intergenic_region	MODIFIER	CDH3-ZFP90	ENSSSCG00000023162-ENSSSCG00000032372	snv
	10	5603372	A	G	0.602041	WZS01853-ZF3_153-sgRNACas9-KO-	control_CRISPR	somatic	intergenic_region	MODIFIER	U6-ENSSSCG00000049015	ENSSSCG00000036162-ENSSSCG00000049015	snv
	17	6998195	C	T	0.488372	WZS01853-ZF3_153-sgRNACas9-KO-	control_CRISPR	somatic	intergenic_region	MODIFIER	ENSSSCG00000048723-ENSSSCG00000041095	ENSSSCG00000048723-ENSSSCG00000041095	snv
	2	20337317	AT	A	0.641304	WZS01853-ZF3_153-sgRNACas9-KO-	control_CRISPR	somatic	intergenic_region	MODIFIER	ENSSSCG00000047796-ENSSSCG00000047142	ENSSSCG00000047796-ENSSSCG00000047142	indel
	1	269262341	G	A	0.529915	WZS01853-ZF3_153-sgRNACas9-KO-	control_CRISPR	somatic	upstream_gene_variant	MODIFIER	DOLK	ENSSSCG00000005666	snv
	2	151161027	G	A	0.263158	WZS01853-ZF3_153-sgRNACas9-KO-	control_CRISPR	somatic	synonymous_variant	LOW	PDGFRB	ENSSSCG00000022741	snv
	2	27663756	C	A	0.45045	WZS01853-ZF3_153-sgRNACas9-KO-	control_CRISPR	somatic	intron_variant	MODIFIER	HIPK3	ENSSSCG00000013312	snv
	15	34457104	C	A	0.489051	WZS01853-ZF3_153-sgRNACas9-KO-	control_CRISPR	somatic	intron_variant	MODIFIER	CSMD1	ENSSSCG00000015748	snv
	8	31474892	T	C	0.477273	WZS01853-ZF3_153-sgRNACas9-KO-	control_CRISPR	somatic	intergenic_region	MODIFIER	ENSSSCG00000042573-RBM47	ENSSSCG00000042573-ENSSSCG00000008796	snv
	9	106544781	A	G	0.275	WZS01853-ZF3_153-sgRNACas9-KO-	control_CRISPR	somatic	synonymous_variant	LOW	CCDC71L	ENSSSCG00000050093	snv
	7	29745157	C	CT	0.201754	WZS01853-ZF3_153-sgRNACas9-KO-	control_CRISPR	somatic	frameshift_variant&splice_region_variant	HIGH	SYNGAP1	ENSSSCG00000001513	indel
	6	55216036	G	C	0.216216	WZS01853-ZF3_153-sgRNACas9-KO-	control_CRISPR	somatic	synonymous_variant	LOW	KCNC3	ENSSSCG00000003214	snv
	1	231849343	T	C	0.528455	WZS01853-ZF3_153-sgRNACas9-KO-	control_CRISPR	somatic	intergenic_region	MODIFIER	PSAT1-ENSSSCG00000041713	ENSSSCG00000005287-ENSSSCG00000041713	snv
	1	209448843	T	C	0.521277	WZS01853-ZF3_153-sgRNACas9-KO-	control_CRISPR	somatic	intergenic_region	MODIFIER	ENSSSCG00000051645-U2	ENSSSCG00000051645-ENSSSCG00000034928	snv
	8	16777527	A	T	0.527273	WZS01853-ZF3_153-sgRNACas9-KO-	control_CRISPR	somatic	intron_variant	MODIFIER	ADGRA3	ENSSSCG00000008753	snv
	9	75714310	A	T	0.444444	WZS01853-ZF3_153-sgRNACas9-KO-	control_CRISPR	somatic	intron_variant	MODIFIER	DYNC1I1	ENSSSCG00000015335	snv
	9	1697023	A	G	0.347222	WZS01853-ZF3_153-sgRNACas9-KO-	control_CRISPR	somatic	intron_variant	MODIFIER	ENSSSCG00000044445	ENSSSCG00000044445	snv
	5	1889253	C	T	0.385417	WZS01853-ZF3_153-sgRNACas9-KO-	control_CRISPR	somatic	intergenic_region	MODIFIER	ENSSSCG00000034275-ENSSSCG00000047658	ENSSSCG00000034275-ENSSSCG00000047658	snv
	15	53116986	A	G	0.535211	WZS01853-ZF3_153-sgRNACas9-KO-	control_CRISPR	somatic	intron_variant	MODIFIER	NRG1	ENSSSCG00000015839	snv
	13	180754167	A	T	0.506849	WZS01853-ZF3_153-sgRNACas9-KO-	control_CRISPR	somatic	intergenic_region	MODIFIER	USP25-ENSSSCG00000043443	ENSSSCG00000024623-ENSSSCG00000043443	snv
	17	8243567	G	A	0.525862	WZS01853-ZF3_153-sgRNACas9-KO-	control_CRISPR	somatic	intergenic_region	MODIFIER	U6-FAT1	ENSSSCG00000023375-ENSSSCG00000007000	snv
	16	21211481	G	T	0.490566	WZS01853-ZF3_153-sgRNACas9-KO-	control_CRISPR	somatic	intron_variant	MODIFIER	SPEF2	ENSSSCG00000016831	snv
	17	62786272	C	T	0.25641	WZS01853-ZF3_153-sgRNACas9-KO-	control_CRISPR	somatic	synonymous_variant	LOW	ZNF512B	ENSSSCG00000035939	snv
	15	123043921	TA	T	0.5	WZS01853-ZF3_153-sgRNACas9-KO-	control_CRISPR	somatic	intergenic_region	MODIFIER	ENSSSCG00000044791-ENSSSCG00000045793	ENSSSCG00000044791-ENSSSCG00000045793	indel
	14	26914995	G	A	0.483221	WZS01853-ZF3_153-sgRNACas9-KO-	control_CRISPR	somatic	intergenic_region	MODIFIER	ENSSSCG00000040330-ENSSSCG00000045739	ENSSSCG00000040330-ENSSSCG00000045739	snv
	16	3644518	C	A	0.446602	WZS01853-ZF3_153-sgRNACas9-KO-	control_CRISPR	somatic	intron_variant	MODIFIER	TRIO	ENSSSCG00000016781	snv
	13	37043916	T	C	0.588235	WZS01853-ZF3_153-sgRNACas9-KO-	control_CRISPR	somatic	intergenic_region	MODIFIER	CACNA2D3-ENSSSCG00000041118	ENSSSCG00000027019-ENSSSCG00000041118	snv
	8	134330485	T	C	0.576923	WZS01853-ZF3_153-sgRNACas9-KO-	control_CRISPR	somatic	intergenic_region	MODIFIER	ENSSSCG00000047937-ENSSSCG00000051072	ENSSSCG00000047937-ENSSSCG00000051072	snv
	2	140424957	C	T	0.244604	WZS01853-ZF3_153-sgRNACas9-KO-	control_CRISPR	somatic	synonymous_variant	LOW	REEP2	ENSSSCG00000014335	snv
	2	29168073	T	C	0.514085	WZS01853-ZF3_153-sgRNACas9-KO-	control_CRISPR	somatic	intron_variant	MODIFIER	ELP4	ENSSSCG00000013321	snv
	3	123349181	C	A	0.564103	WZS01853-ZF3_153-sgRNACas9-KO-	control_CRISPR	somatic	intergenic_region	MODIFIER	ENSSSCG00000042068-ENSSSCG00000045521	ENSSSCG00000042068-ENSSSCG00000045521	snv
	4	68801295	G	T	0.418182	WZS01853-ZF3_153-sgRNACas9-KO-	control_CRISPR	somatic	intron_variant	MODIFIER	PDE7A	ENSSSCG00000006218	snv
	7	32043405	C	A	0.323077	WZS01853-ZF3_153-sgRNACas9-KO-	control_CRISPR	somatic	intron_variant	MODIFIER	BNIP5	ENSSSCG00000001560	snv
	6	126931930	A	G	0.51145	WZS01853-ZF3_153-sgRNACas9-KO-	control_CRISPR	somatic	intergenic_region	MODIFIER	ENSSSCG00000037233-SYT4	ENSSSCG00000037233-ENSSSCG00000037079	snv
	1	26372833	C	A	0.448529	WZS01853-ZF3_153-sgRNACas9-KO-	control_CRISPR	somatic	intergenic_region	MODIFIER	PERP-TNFAIP3	ENSSSCG00000038420-ENSSSCG00000004154	snv
	18	31359318	G	T	0.563492	WZS01853-ZF3_153-sgRNACas9-KO-	control_CRISPR	somatic	intron_variant	MODIFIER	FOXP2	ENSSSCG00000016639	snv
	17	6536484	G	T	0.496644	WZS01853-ZF3_153-sgRNACas9-KO-	control_CRISPR	somatic	intergenic_region	MODIFIER	ENSSSCG00000049115-ENSSSCG00000048723	ENSSSCG00000049115-ENSSSCG00000048723	snv
	13	131226623	T	G	0.425532	WZS01853-ZF3_153-sgRNACas9-KO-	control_CRISPR	somatic	intergenic_region	MODIFIER	HES1-ENSSSCG00000049789	ENSSSCG00000031356-ENSSSCG00000049789	snv
	14	92181871	G	T	0.494253	WZS01853-ZF3_153-sgRNACas9-KO-	control_CRISPR	somatic	intergenic_region	MODIFIER	ENSSSCG00000051489-ZNF239	ENSSSCG00000051489-ENSSSCG00000029576	snv
	6	153841475	G	T	0.2	WZS01853-ZF3_153-sgRNACas9-KO-	control_CRISPR	somatic	intergenic_region	MODIFIER	MYSM1-TACSTD2	ENSSSCG00000003830-ENSSSCG00000003832	snv
	1	102655180	C	A	0.542636	WZS01853-ZF3_153-sgRNACas9-KO-	control_CRISPR	somatic	intron_variant	MODIFIER	DCC	ENSSSCG00000040836	snv
	4	126114991	T	G	0.387597	WZS01853-ZF3_153-sgRNACas9-KO-	control_CRISPR	somatic	intergenic_region	MODIFIER	U6-ENSSSCG00000043214	ENSSSCG00000023240-ENSSSCG00000043214	snv
	6	121872954	GA	G	0.44898	WZS01853-ZF3_153-sgRNACas9-KO-	control_CRISPR	somatic	intergenic_region	MODIFIER	ENSSSCG00000045450-ENSSSCG00000049226	ENSSSCG00000045450-ENSSSCG00000049226	indel
	1	262708768	T	G	0.306569	WZS01853-ZF3_153-sgRNACas9-KO-	control_CRISPR	somatic	downstream_gene_variant	MODIFIER	ENSSSCG00000035100	ENSSSCG00000035100	snv
	14	68972809	G	T	0.616071	WZS01853-ZF3_153-sgRNACas9-KO-	control_CRISPR	somatic	intergenic_region	MODIFIER	ENSSSCG00000041188-CTNNA3	ENSSSCG00000041188-ENSSSCG00000036480	snv
	6	149538452	C	T	0.517647	WZS01853-ZF3_153-sgRNACas9-KO-	control_CRISPR	somatic	intergenic_region	MODIFIER	ENSSSCG00000041633-ATG4C	ENSSSCG00000041633-ENSSSCG00000003816	snv
	1	151258911	A	C	0.4375	WZS01853-ZF3_153-sgRNACas9-KO-	control_CRISPR	somatic	intergenic_region	MODIFIER	CBLN2-ENSSSCG00000044321	ENSSSCG00000020859-ENSSSCG00000044321	snv
	14	95658745	A	G	0.523179	WZS01853-ZF3_153-sgRNACas9-KO-	control_CRISPR	somatic	missense_variant	MODERATE	ENSSSCG00000010426	ENSSSCG00000010426	snv
	13	151534181	T	C	0.467105	WZS01853-ZF3_153-sgRNACas9-KO-	control_CRISPR	somatic	intergenic_region	MODIFIER	CD47-ENSSSCG00000041999	ENSSSCG00000011942-ENSSSCG00000041999	snv
	2	109060839	A	G	0.471074	WZS01853-ZF3_153-sgRNACas9-KO-	control_CRISPR	somatic	upstream_gene_variant	MODIFIER	NUDT12	ENSSSCG00000014187	snv
	11	32737799	G	A	0.420561	WZS01853-ZF3_153-sgRNACas9-KO-	control_CRISPR	somatic	intron_variant	MODIFIER	DIAPH3	ENSSSCG00000009448	snv
	15	98776772	G	A	0.546218	WZS01853-ZF3_153-sgRNACas9-KO-	control_CRISPR	somatic	intergenic_region	MODIFIER	ENSSSCG00000043415-ENSSSCG00000046643	ENSSSCG00000043415-ENSSSCG00000046643	snv
	13	162720607	C	A	0.446154	WZS01853-ZF3_153-sgRNACas9-KO-	control_CRISPR	somatic	intron_variant	MODIFIER	EPHA6	ENSSSCG00000033898	snv
	15	34650351	A	G	0.207692	WZS01853-ZF3_153-sgRNACas9-KO-	control_CRISPR	somatic	intron_variant	MODIFIER	CSMD1	ENSSSCG00000015748	snv
	1	153541781	G	T	0.516393	WZS01853-ZF3_153-sgRNACas9-KO-	control_CRISPR	somatic	intergenic_region	MODIFIER	DOK6-ENSSSCG00000032084	ENSSSCG00000028977-ENSSSCG00000032084	snv
	13	44836852	A	C	0.510791	WZS01853-ZF3_153-sgRNACas9-KO-	control_CRISPR	somatic	upstream_gene_variant	MODIFIER	SYNPR	ENSSSCG00000027617	snv
	6	56588945	C	T	0.220513	WZS01853-ZF3_153-sgRNACas9-KO-	control_CRISPR	somatic	splice_region_variant&intron_variant	LOW	ENSSSCG00000032690	ENSSSCG00000032690	snv
	9	114316233	A	G	0.508621	WZS01853-ZF3_153-sgRNACas9-KO-	control_CRISPR	somatic	intron_variant	MODIFIER	DNM3	ENSSSCG00000038958	snv
	6	73460	A	G	0.213793	WZS01853-ZF3_153-sgRNACas9-KO-	control_CRISPR	somatic	missense_variant	MODERATE	PRDM7	ENSSSCG00000026662	snv
	11	38346890	A	C	0.448	WZS01853-ZF3_153-sgRNACas9-KO-	control_CRISPR	somatic	intergenic_region	MODIFIER	ENSSSCG00000051326-PCDH9	ENSSSCG00000051326-ENSSSCG00000038842	snv
	14	102467351	T	C	0.418182	WZS01853-ZF3_153-sgRNACas9-KO-	control_CRISPR	somatic	intron_variant	MODIFIER	HTR7	ENSSSCG00000010459	snv
	15	98713860	A	G	0.598425	WZS01853-ZF3_153-sgRNACas9-KO-	control_CRISPR	somatic	upstream_gene_variant	MODIFIER	ENSSSCG00000046893	ENSSSCG00000046893	snv
	1	60686074	A	T	0.558333	WZS01853-ZF3_153-sgRNACas9-KO-	control_CRISPR	somatic	intergenic_region	MODIFIER	U2-EPHA7	ENSSSCG00000042748-ENSSSCG00000004336	snv
	15	65022003	A	G	0.208633	WZS01853-ZF3_153-sgRNACas9-KO-	control_CRISPR	somatic	intergenic_region	MODIFIER	U6-CCDC148	ENSSSCG00000036729-ENSSSCG00000015876	snv
	1	137055785	GA	G	0.483516	WZS01853-ZF3_153-sgRNACas9-KO-	control_CRISPR	somatic	intergenic_region	MODIFIER	FMN1-ENSSSCG00000050629	ENSSSCG00000044690-ENSSSCG00000050629	indel
	6	23237386	A	G	0.469697	WZS01853-ZF3_153-sgRNACas9-KO-	control_CRISPR	somatic	intron_variant	MODIFIER	CDH8	ENSSSCG00000040687	snv
	16	14318916	A	C	0.438462	WZS01853-ZF3_153-sgRNACas9-KO-	control_CRISPR	somatic	intergenic_region	MODIFIER	CDH9-ENSSSCG00000041821	ENSSSCG00000020845-ENSSSCG00000041821	snv
	10	34229634	A	C	0.541401	WZS01853-ZF3_153-sgRNACas9-KO-	control_CRISPR	somatic	intergenic_region	MODIFIER	ENSSSCG00000046623-ENSSSCG00000051410	ENSSSCG00000046623-ENSSSCG00000051410	snv
	1	170813599	G	GA	0.444444	WZS01853-ZF3_153-sgRNACas9-KO-	control_CRISPR	somatic	intergenic_region	MODIFIER	ENSSSCG00000044807-ENSSSCG00000044677	ENSSSCG00000044807-ENSSSCG00000044677	indel
	6	56396687	GA	G	0.632653	WZS01853-ZF3_153-sgRNACas9-KO-	control_CRISPR	somatic	downstream_gene_variant	MODIFIER	ENSSSCG00000049908	ENSSSCG00000049908	indel
	15	8748076	A	G	0.532895	WZS01853-ZF3_153-sgRNACas9-KO-	control_CRISPR	somatic	intron_variant	MODIFIER	ARHGAP15	ENSSSCG00000015671	snv
	6	18330661	G	A	0.236559	WZS01853-ZF3_153-sgRNACas9-KO-	control_CRISPR	somatic	upstream_gene_variant	MODIFIER	ENSSSCG00000049492	ENSSSCG00000049492	snv
	10	36670826	G	T	0.564815	WZS01853-ZF3_153-sgRNACas9-KO-	control_CRISPR	somatic	intergenic_region	MODIFIER	U6-ENSSSCG00000048189	ENSSSCG00000040094-ENSSSCG00000048189	snv
	9	5687682	A	T	0.577778	WZS01853-ZF3_153-sgRNACas9-KO-	control_CRISPR	somatic	intron_variant	MODIFIER	ENSSSCG00000048888	ENSSSCG00000048888	snv
	11	53049557	A	G	0.255034	WZS01853-ZF3_153-sgRNACas9-KO-	control_CRISPR	somatic	intergenic_region	MODIFIER	SNORA70-ENSSSCG00000045873	ENSSSCG00000021526-ENSSSCG00000045873	snv
	3	92575789	G	T	0.460317	WZS01853-ZF3_153-sgRNACas9-KO-	control_CRISPR	somatic	downstream_gene_variant	MODIFIER	ENSSSCG00000049889	ENSSSCG00000049889	snv
	4	21443134	C	A	0.564516	WZS01853-ZF3_153-sgRNACas9-KO-	control_CRISPR	somatic	intron_variant	MODIFIER	ENSSSCG00000045714	ENSSSCG00000045714	snv
	14	164526	C	T	0.203008	WZS01853-ZF3_153-sgRNACas9-KO-	control_CRISPR	somatic	upstream_gene_variant	MODIFIER	ENSSSCG00000046724	ENSSSCG00000046724	snv
	6	123344930	C	A	0.53125	WZS01853-ZF3_153-sgRNACas9-KO-	control_CRISPR	somatic	intergenic_region	MODIFIER	ENSSSCG00000045450-ENSSSCG00000049226	ENSSSCG00000045450-ENSSSCG00000049226	snv
	6	118184033	C	A	0.45098	WZS01853-ZF3_153-sgRNACas9-KO-	control_CRISPR	somatic	intron_variant	MODIFIER	NOL4	ENSSSCG00000003737	snv
	14	83320752	T	C	0.422222	WZS01853-ZF3_153-sgRNACas9-KO-	control_CRISPR	somatic	downstream_gene_variant	MODIFIER	ENSSSCG00000049810	ENSSSCG00000049810	snv
	7	66142669	CT	C	0.591398	WZS01853-ZF3_153-sgRNACas9-KO-	control_CRISPR	somatic	intron_variant	MODIFIER	NPAS3	ENSSSCG00000001964	indel
	13	36487688	T	C	0.503704	WZS01853-ZF3_153-sgRNACas9-KO-	control_CRISPR	somatic	intron_variant	MODIFIER	CACNA2D3	ENSSSCG00000027019	snv
	4	59418434	G	T	0.45614	WZS01853-ZF3_153-sgRNACas9-KO-	control_CRISPR	somatic	intron_variant	MODIFIER	ZFHX4	ENSSSCG00000006169	snv
	15	15223484	T	A	0.46729	WZS01853-ZF3_153-sgRNACas9-KO-	control_CRISPR	somatic	downstream_gene_variant	MODIFIER	ENSSSCG00000045566	ENSSSCG00000045566	snv
	6	159878557	T	G	0.627273	WZS01853-ZF3_153-sgRNACas9-KO-	control_CRISPR	somatic	intron_variant	MODIFIER	ZFYVE9	ENSSSCG00000003863	snv
	15	34253120	CT	C	0.424528	WZS01853-ZF3_153-sgRNACas9-KO-	control_CRISPR	somatic	intron_variant	MODIFIER	ENSSSCG00000050605	ENSSSCG00000050605	indel
	3	99695891	T	G	0.516129	WZS01853-ZF3_153-sgRNACas9-KO-	control_CRISPR	somatic	intergenic_region	MODIFIER	ENSSSCG00000048362-ENSSSCG00000043111	ENSSSCG00000048362-ENSSSCG00000043111	snv
	7	95953417	G	GT	0.53211	WZS01853-ZF3_153-sgRNACas9-KO-	control_CRISPR	somatic	intergenic_region	MODIFIER	RGS6-ENSSSCG00000042958	ENSSSCG00000033093-ENSSSCG00000042958	indel
	6	138845273	G	C	0.480916	WZS01853-ZF3_153-sgRNACas9-KO-	control_CRISPR	somatic	intron_variant	MODIFIER	ENSSSCG00000040109	ENSSSCG00000040109	snv
	9	78600246	CT	C	0.583333	WZS01853-ZF3_153-sgRNACas9-KO-	control_CRISPR	somatic	intron_variant	MODIFIER	ENSSSCG00000046846	ENSSSCG00000046846	indel
	13	104223868	A	T	0.522124	WZS01853-ZF3_153-sgRNACas9-KO-	control_CRISPR	somatic	intergenic_region	MODIFIER	ENSSSCG00000045618-SI	ENSSSCG00000045618-ENSSSCG00000011735	snv
	9	102250104	G	A	0.532258	WZS01853-ZF3_153-sgRNACas9-KO-	control_CRISPR	somatic	intron_variant	MODIFIER	PHTF2	ENSSSCG00000015410	snv
	16	13488615	A	G	0.507463	WZS01853-ZF3_153-sgRNACas9-KO-	control_CRISPR	somatic	intergenic_region	MODIFIER	ENSSSCG00000042931-CDH9	ENSSSCG00000042931-ENSSSCG00000020845	snv
	4	94179900	G	T	0.36	WZS01853-ZF3_153-sgRNACas9-KO-	control_CRISPR	somatic	intron_variant	MODIFIER	ENSSSCG00000006510	ENSSSCG00000006510	snv
	1	46000061	A	C	0.554054	WZS01853-ZF3_153-sgRNACas9-KO-	control_CRISPR	somatic	intergenic_region	MODIFIER	PHF3-ENSSSCG00000049526	ENSSSCG00000035259-ENSSSCG00000049526	snv
	1	259939656	G	T	0.51938	WZS01853-ZF3_153-sgRNACas9-KO-	control_CRISPR	somatic	intron_variant	MODIFIER	ENSSSCG00000045158	ENSSSCG00000045158	snv
	1	65168210	A	T	0.223301	WZS01853-ZF3_153-sgRNACas9-KO-	control_CRISPR	somatic	downstream_gene_variant	MODIFIER	ENSSSCG00000042619	ENSSSCG00000042619	snv
	14	93558551	C	A	0.453333	WZS01853-ZF3_153-sgRNACas9-KO-	control_CRISPR	somatic	intron_variant	MODIFIER	ENSSSCG00000045253	ENSSSCG00000045253	snv
	15	131789149	C	A	0.519685	WZS01853-ZF3_153-sgRNACas9-KO-	control_CRISPR	somatic	intron_variant	MODIFIER	C2orf72	ENSSSCG00000016270	snv
	16	57874990	G	T	0.564103	WZS01853-ZF3_153-sgRNACas9-KO-	control_CRISPR	somatic	intergenic_region	MODIFIER	U6-ENSSSCG00000050968	ENSSSCG00000020610-ENSSSCG00000050968	snv
	2	54979971	T	G	0.678571	WZS01853-ZF3_153-sgRNACas9-KO-	control_CRISPR	somatic	downstream_gene_variant	MODIFIER	ENSSSCG00000042129	ENSSSCG00000042129	snv
	3	47099435	T	G	0.496815	WZS01853-ZF3_153-sgRNACas9-KO-	control_CRISPR	somatic	intergenic_region	MODIFIER	ASTL-ENSSSCG00000043091	ENSSSCG00000008126-ENSSSCG00000043091	snv
	9	114651417	T	C	0.446602	WZS01853-ZF3_153-sgRNACas9-KO-	control_CRISPR	somatic	intron_variant	MODIFIER	DNM3	ENSSSCG00000038958	snv
	8	58123089	A	AT	0.391753	WZS01853-ZF3_153-sgRNACas9-KO-	control_CRISPR	somatic	intergenic_region	MODIFIER	ENSSSCG00000043708-ENSSSCG00000049845	ENSSSCG00000043708-ENSSSCG00000049845	indel
	16	13729566	C	T	0.572519	WZS01853-ZF3_153-sgRNACas9-KO-	control_CRISPR	somatic	intergenic_region	MODIFIER	ENSSSCG00000042931-CDH9	ENSSSCG00000042931-ENSSSCG00000020845	snv
	6	101270165	C	A	0.553398	WZS01853-ZF3_153-sgRNACas9-KO-	control_CRISPR	somatic	intergenic_region	MODIFIER	ENSSSCG00000051713-ENSSSCG00000048839	ENSSSCG00000051713-ENSSSCG00000048839	snv
	15	35704979	G	A	0.435484	WZS01853-ZF3_153-sgRNACas9-KO-	control_CRISPR	somatic	intergenic_region	MODIFIER	ENSSSCG00000047354-ENSSSCG00000046725	ENSSSCG00000047354-ENSSSCG00000046725	snv
	15	50944370	G	T	0.527778	WZS01853-ZF3_153-sgRNACas9-KO-	control_CRISPR	somatic	intergenic_region	MODIFIER	UNC5D-ENSSSCG00000044341	ENSSSCG00000015830-ENSSSCG00000044341	snv
	8	22987884	C	A	0.482456	WZS01853-ZF3_153-sgRNACas9-KO-	control_CRISPR	somatic	intergenic_region	MODIFIER	ENSSSCG00000045318-ENSSSCG00000051649	ENSSSCG00000045318-ENSSSCG00000051649	snv
	8	32279012	C	A	0.465753	WZS01853-ZF3_153-sgRNACas9-KO-	control_CRISPR	somatic	intron_variant	MODIFIER	APBB2	ENSSSCG00000022168	snv
	10	25227976	G	A	0.232558	WZS01853-ZF3_153-sgRNACas9-KO-	control_CRISPR	somatic	intergenic_region	MODIFIER	CTSV-ENSSSCG00000031186	ENSSSCG00000011171-ENSSSCG00000031186	snv
	7	90492763	C	A	0.53211	WZS01853-ZF3_153-sgRNACas9-KO-	control_CRISPR	somatic	intron_variant	MODIFIER	GPHN	ENSSSCG00000002285	snv
	15	11960075	TA	T	0.442623	WZS01853-ZF3_153-sgRNACas9-KO-	control_CRISPR	somatic	intergenic_region	MODIFIER	ENSSSCG00000047966-ENSSSCG00000047486	ENSSSCG00000047966-ENSSSCG00000047486	indel
	13	117983829	A	T	0.464286	WZS01853-ZF3_153-sgRNACas9-KO-	control_CRISPR	somatic	intron_variant	MODIFIER	PEX5L	ENSSSCG00000011766	snv
	17	10166117	C	A	0.538462	WZS01853-ZF3_153-sgRNACas9-KO-	control_CRISPR	somatic	intron_variant	MODIFIER	ZMAT4	ENSSSCG00000007010	snv
	15	23921905	G	A	0.5	WZS01853-ZF3_153-sgRNACas9-KO-	control_CRISPR	somatic	intergenic_region	MODIFIER	INSIG2-ENSSSCG00000047237	ENSSSCG00000036229-ENSSSCG00000047237	snv
	3	56064191	GA	G	0.614754	WZS01853-ZF3_153-sgRNACas9-KO-	control_CRISPR	somatic	intron_variant	MODIFIER	VWA3B	ENSSSCG00000033394	indel
	4	10951447	C	T	0.533784	WZS01853-ZF3_153-sgRNACas9-KO-	control_CRISPR	somatic	intron_variant	MODIFIER	ENSSSCG00000043497	ENSSSCG00000043497	snv
	1	134844853	A	C	0.54955	WZS01853-ZF3_153-sgRNACas9-KO-	control_CRISPR	somatic	intergenic_region	MODIFIER	ENSSSCG00000048307-DPH6	ENSSSCG00000048307-ENSSSCG00000035254	snv
	15	88781624	T	G	0.557971	WZS01853-ZF3_153-sgRNACas9-KO-	control_CRISPR	somatic	intergenic_region	MODIFIER	ENSSSCG00000018653-ENSSSCG00000041548	ENSSSCG00000018653-ENSSSCG00000041548	snv
	5	7943824	A	T	0.54023	WZS01853-ZF3_153-sgRNACas9-KO-	control_CRISPR	somatic	intron_variant	MODIFIER	MRTFA	ENSSSCG00000000075	snv
	4	29387562	G	C	0.566667	WZS01853-ZF3_153-sgRNACas9-KO-	control_CRISPR	somatic	intergenic_region	MODIFIER	ENSSSCG00000045490-RSPO2	ENSSSCG00000045490-ENSSSCG00000006034	snv
	1	149951152	C	T	0.510638	WZS01853-ZF3_153-sgRNACas9-KO-	control_CRISPR	somatic	intergenic_region	MODIFIER	FBXO15-ENSSSCG00000050052	ENSSSCG00000004873-ENSSSCG00000050052	snv
	16	61857403	G	T	0.450704	WZS01853-ZF3_153-sgRNACas9-KO-	control_CRISPR	somatic	intron_variant	MODIFIER	GABRA6	ENSSSCG00000017027	snv
	14	105469570	C	A	0.496503	WZS01853-ZF3_153-sgRNACas9-KO-	control_CRISPR	somatic	intron_variant	MODIFIER	PLCE1	ENSSSCG00000010483	snv
	15	40176380	G	A	0.467742	WZS01853-ZF3_153-sgRNACas9-KO-	control_CRISPR	somatic	intergenic_region	MODIFIER	ENSSSCG00000049401-ENSSSCG00000045939	ENSSSCG00000049401-ENSSSCG00000045939	snv
	2	123981738	T	G	0.363265	WZS01853-ZF3_153-sgRNACas9-KO-	control_CRISPR	somatic	intergenic_region	MODIFIER	FAM170A-PRR16	ENSSSCG00000014228-ENSSSCG00000039760	snv
	1	17483221	C	T	0.414141	WZS01853-ZF3_153-sgRNACas9-KO-	control_CRISPR	somatic	intron_variant	MODIFIER	SASH1	ENSSSCG00000033175	snv
	7	16837361	G	C	0.402878	WZS01853-ZF3_153-sgRNACas9-KO-	control_CRISPR	somatic	upstream_gene_variant	MODIFIER	ENSSSCG00000050667	ENSSSCG00000050667	snv
	8	34707387	G	T	0.548872	WZS01853-ZF3_153-sgRNACas9-KO-	control_CRISPR	somatic	intergenic_region	MODIFIER	ENSSSCG00000037522-KCTD8	ENSSSCG00000037522-ENSSSCG00000035712	snv
	15	34733551	G	T	0.544776	WZS01853-ZF3_153-sgRNACas9-KO-	control_CRISPR	somatic	intron_variant	MODIFIER	CSMD1	ENSSSCG00000015748	snv
	1	211166074	T	A	0.579439	WZS01853-ZF3_153-sgRNACas9-KO-	control_CRISPR	somatic	intergenic_region	MODIFIER	U6-ENSSSCG00000050028	ENSSSCG00000050395-ENSSSCG00000050028	snv
	1	68121316	T	A	0.636364	WZS01853-ZF3_153-sgRNACas9-KO-	control_CRISPR	somatic	intron_variant	MODIFIER	GRIK2	ENSSSCG00000004361	snv
	4	121979725	C	T	0.52381	WZS01853-ZF3_153-sgRNACas9-KO-	control_CRISPR	somatic	intergenic_region	MODIFIER	ENSSSCG00000050922-ENSSSCG00000049045	ENSSSCG00000050922-ENSSSCG00000049045	snv
	17	45014395	G	A	0.253968	WZS01853-ZF3_153-sgRNACas9-KO-	control_CRISPR	somatic	intron_variant	MODIFIER	PTPRT	ENSSSCG00000038990	snv
	16	13150274	CT	C	0.532468	WZS01853-ZF3_153-sgRNACas9-KO-	control_CRISPR	somatic	intergenic_region	MODIFIER	ENSSSCG00000045389-ENSSSCG00000042931	ENSSSCG00000045389-ENSSSCG00000042931	indel
	13	195588883	T	C	0.477941	WZS01853-ZF3_153-sgRNACas9-KO-	control_CRISPR	somatic	intron_variant	MODIFIER	HUNK	ENSSSCG00000029392	snv
	5	36276268	T	C	0.439024	WZS01853-ZF3_153-sgRNACas9-KO-	control_CRISPR	somatic	upstream_gene_variant	MODIFIER	ENSSSCG00000048562	ENSSSCG00000048562	snv
	13	103609756	C	T	0.429825	WZS01853-ZF3_153-sgRNACas9-KO-	control_CRISPR	somatic	intergenic_region	MODIFIER	ENSSSCG00000045945-ENSSSCG00000020451	ENSSSCG00000045945-ENSSSCG00000020451	snv
	1	147317698	C	T	0.487179	WZS01853-ZF3_153-sgRNACas9-KO-	control_CRISPR	somatic	intergenic_region	MODIFIER	ENSSSCG00000044951-GALR1	ENSSSCG00000044951-ENSSSCG00000036984	snv
	3	63804143	G	A	0.528736	WZS01853-ZF3_153-sgRNACas9-KO-	control_CRISPR	somatic	intron_variant	MODIFIER	ENSSSCG00000008250	ENSSSCG00000008250	snv
	1	181971501	A	G	0.192053	WZS01853-ZF3_153-sgRNACas9-KO-	control_CRISPR	somatic	intron_variant	MODIFIER	PTGER2	ENSSSCG00000021862	snv
	14	3264082	C	G	0.558824	WZS01853-ZF3_153-sgRNACas9-KO-	control_CRISPR	somatic	intergenic_region	MODIFIER	ENSSSCG00000009595-ENSSSCG00000047879	ENSSSCG00000009595-ENSSSCG00000047879	snv
	2	52053397	G	C	0.495238	WZS01853-ZF3_153-sgRNACas9-KO-	control_CRISPR	somatic	intergenic_region	MODIFIER	ENSSSCG00000048601-ENSSSCG00000013980	ENSSSCG00000048601-ENSSSCG00000013980	snv
	3	61110409	T	C	0.560345	WZS01853-ZF3_153-sgRNACas9-KO-	control_CRISPR	somatic	intergenic_region	MODIFIER	U2-U6	ENSSSCG00000019380-ENSSSCG00000035540	snv
	11	45851301	T	A	0.527273	WZS01853-ZF3_153-sgRNACas9-KO-	control_CRISPR	somatic	intergenic_region	MODIFIER	KLF5-ENSSSCG00000045422	ENSSSCG00000035101-ENSSSCG00000045422	snv
	8	52978427	G	A	0.503937	WZS01853-ZF3_153-sgRNACas9-KO-	control_CRISPR	somatic	intergenic_region	MODIFIER	ENSSSCG00000039175-ENSSSCG00000050932	ENSSSCG00000039175-ENSSSCG00000050932	snv
	13	16679647	A	G	0.225806	WZS01853-ZF3_153-sgRNACas9-KO-	control_CRISPR	somatic	intergenic_region	MODIFIER	ENSSSCG00000047248-ENSSSCG00000049615	ENSSSCG00000047248-ENSSSCG00000049615	snv
	13	42476565	T	TTC	0.515464	WZS01853-ZF3_153-sgRNACas9-KO-	control_CRISPR	somatic	intron_variant	MODIFIER	ENSSSCG00000049107	ENSSSCG00000049107	indel
	1	149506842	C	G	0.577465	WZS01853-ZF3_153-sgRNACas9-KO-	control_CRISPR	somatic	intron_variant	MODIFIER	ZNF407	ENSSSCG00000033971	snv
	2	92546697	G	C	0.553571	WZS01853-ZF3_153-sgRNACas9-KO-	control_CRISPR	somatic	intron_variant	MODIFIER	EDIL3	ENSSSCG00000026780	snv
	10	23049620	C	A	0.544554	WZS01853-ZF3_153-sgRNACas9-KO-	control_CRISPR	somatic	intergenic_region	MODIFIER	ZNF281-KIF14	ENSSSCG00000010911-ENSSSCG00000010912	snv
	13	143443699	C	T	0.509677	WZS01853-ZF3_153-sgRNACas9-KO-	control_CRISPR	somatic	intergenic_region	MODIFIER	ENSSSCG00000047219-ENSSSCG00000045503	ENSSSCG00000047219-ENSSSCG00000045503	snv
	2	82889286	A	G	0.529412	WZS01853-ZF3_153-sgRNACas9-KO-	control_CRISPR	somatic	intron_variant	MODIFIER	ARHGEF28	ENSSSCG00000028317	snv
	15	27698167	G	T	0.242424	WZS01853-ZF3_153-sgRNACas9-KO-	control_CRISPR	somatic	intron_variant	MODIFIER	CNTNAP5	ENSSSCG00000015726	snv
	15	72654372	A	G	0.530769	WZS01853-ZF3_153-sgRNACas9-KO-	control_CRISPR	somatic	intron_variant	MODIFIER	SCN1A	ENSSSCG00000024204	snv
	3	117937875	C	A	0.516129	WZS01853-ZF3_153-sgRNACas9-KO-	control_CRISPR	somatic	intron_variant	MODIFIER	PUM2	ENSSSCG00000008600	snv
	2	21982719	A	G	0.441667	WZS01853-ZF3_153-sgRNACas9-KO-	control_CRISPR	somatic	intergenic_region	MODIFIER	ENSSSCG00000049735-ENSSSCG00000047030	ENSSSCG00000049735-ENSSSCG00000047030	snv
	13	15294455	C	A	0.427419	WZS01853-ZF3_153-sgRNACas9-KO-	control_CRISPR	somatic	intergenic_region	MODIFIER	ENSSSCG00000033794-ENSSSCG00000051724	ENSSSCG00000033794-ENSSSCG00000051724	snv
	5	54808147	T	A	0.255319	WZS01853-ZF3_153-sgRNACas9-KO-	control_CRISPR	somatic	intron_variant	MODIFIER	PIK3C2G	ENSSSCG00000000591	snv
	8	105594320	T	C	0.471429	WZS01853-ZF3_153-sgRNACas9-KO-	control_CRISPR	somatic	intergenic_region	MODIFIER	NDST3-ENSSSCG00000048550	ENSSSCG00000009115-ENSSSCG00000048550	snv
	3	51501687	G	C	0.537879	WZS01853-ZF3_153-sgRNACas9-KO-	control_CRISPR	somatic	intergenic_region	MODIFIER	TMEM182-MFSD9	ENSSSCG00000008150-ENSSSCG00000038714	snv
	13	18991880	T	C	0.290698	WZS01853-ZF3_153-sgRNACas9-KO-	control_CRISPR	somatic	upstream_gene_variant	MODIFIER	CRTAP	ENSSSCG00000039054	snv
	13	105313238	T	G	0.431579	WZS01853-ZF3_153-sgRNACas9-KO-	control_CRISPR	somatic	intergenic_region	MODIFIER	ENSSSCG00000033350-ZBBX	ENSSSCG00000033350-ENSSSCG00000023393	snv
	15	34121900	GA	G	0.491803	WZS01853-ZF3_153-sgRNACas9-KO-	control_CRISPR	somatic	intron_variant	MODIFIER	ENSSSCG00000050605	ENSSSCG00000050605	indel
	1	69857786	C	A	0.589286	WZS01853-ZF3_153-sgRNACas9-KO-	control_CRISPR	somatic	intergenic_region	MODIFIER	ENSSSCG00000046266-ENSSSCG00000047827	ENSSSCG00000046266-ENSSSCG00000047827	snv
	2	54823295	C	T	0.49359	WZS01853-ZF3_153-sgRNACas9-KO-	control_CRISPR	somatic	intergenic_region	MODIFIER	ENSSSCG00000041194-OR2M4	ENSSSCG00000041194-ENSSSCG00000049328	snv
	4	124680383	C	T	0.451128	WZS01853-ZF3_153-sgRNACas9-KO-	control_CRISPR	somatic	intergenic_region	MODIFIER	ENSSSCG00000036107-RPAP2	ENSSSCG00000036107-ENSSSCG00000006903	snv
	15	5872851	A	C	0.463415	WZS01853-ZF3_153-sgRNACas9-KO-	control_CRISPR	somatic	intergenic_region	MODIFIER	ACVR2A-ENSSSCG00000037285	ENSSSCG00000015669-ENSSSCG00000037285	snv
	5	25953311	G	T	0.205882	WZS01853-ZF3_153-sgRNACas9-KO-	control_CRISPR	somatic	intergenic_region	MODIFIER	ENSSSCG00000042934-ENSSSCG00000044956	ENSSSCG00000042934-ENSSSCG00000044956	snv
	10	24633355	G	A	0.515464	WZS01853-ZF3_153-sgRNACas9-KO-	control_CRISPR	somatic	3_prime_UTR_variant	MODIFIER	PPP1R12B	ENSSSCG00000010925	snv
	1	48269884	T	G	0.654762	WZS01853-ZF3_153-sgRNACas9-KO-	control_CRISPR	somatic	intergenic_region	MODIFIER	ENSSSCG00000050497-ENSSSCG00000047735	ENSSSCG00000050497-ENSSSCG00000047735	snv
	11	74777788	A	T	0.469231	WZS01853-ZF3_153-sgRNACas9-KO-	control_CRISPR	somatic	intron_variant	MODIFIER	FAM155A	ENSSSCG00000040130	snv
	5	36831097	A	G	0.558559	WZS01853-ZF3_153-sgRNACas9-KO-	control_CRISPR	somatic	intergenic_region	MODIFIER	U4-ENSSSCG00000044906	ENSSSCG00000044578-ENSSSCG00000044906	snv
	3	49035261	A	G	0.0989011	WZS01853-ZF3_153-sgRNACas9-KO-	control_CRISPR	somatic	intergenic_region	MODIFIER	ECRG4-NCK2	ENSSSCG00000037106-ENSSSCG00000008144	snv
	4	26316107	C	A	0.253333	WZS01853-ZF3_153-sgRNACas9-KO-	control_CRISPR	somatic	intergenic_region	MODIFIER	CSMD3-Metazoa_SRP	ENSSSCG00000031031-ENSSSCG00000024195	snv
	7	7135449	C	CT	0.580357	WZS01853-ZF3_153-sgRNACas9-KO-	control_CRISPR	somatic	intergenic_region	MODIFIER	ENSSSCG00000043822-TFAP2A	ENSSSCG00000043822-ENSSSCG00000001036	indel
	1	257575387	T	C	0.511628	WZS01853-ZF3_153-sgRNACas9-KO-	control_CRISPR	somatic	intron_variant	MODIFIER	ASTN2	ENSSSCG00000005502	snv
	6	116135094	C	T	0.472868	WZS01853-ZF3_153-sgRNACas9-KO-	control_CRISPR	somatic	intron_variant	MODIFIER	GAREM1	ENSSSCG00000003731	snv
	2	136636824	C	A	0.492308	WZS01853-ZF3_153-sgRNACas9-KO-	control_CRISPR	somatic	intron_variant	MODIFIER	CDKL3	ENSSSCG00000014302	snv
	13	50051138	T	G	0.457746	WZS01853-ZF3_153-sgRNACas9-KO-	control_CRISPR	somatic	intergenic_region	MODIFIER	ENSSSCG00000047687-ENSSSCG00000049739	ENSSSCG00000047687-ENSSSCG00000049739	snv
	13	145579797	T	C	0.39	WZS01853-ZF3_153-sgRNACas9-KO-	control_CRISPR	somatic	intron_variant	MODIFIER	ZBTB20	ENSSSCG00000026113	snv
	15	101654291	T	C	0.513158	WZS01853-ZF3_153-sgRNACas9-KO-	control_CRISPR	somatic	intron_variant	MODIFIER	PLCL1	ENSSSCG00000016083	snv
	6	106481542	C	A	0.28	WZS01853-ZF3_153-sgRNACas9-KO-	control_CRISPR	somatic	intron_variant	MODIFIER	GREB1L	ENSSSCG00000003699	snv
	1	211711120	A	G	0.571429	WZS01853-ZF3_153-sgRNACas9-KO-	control_CRISPR	somatic	intergenic_region	MODIFIER	ENSSSCG00000050028-ENSSSCG00000045516	ENSSSCG00000050028-ENSSSCG00000045516	snv
	8	73941785	G	A	0.457447	WZS01853-ZF3_153-sgRNACas9-KO-	control_CRISPR	somatic	intron_variant	MODIFIER	FRAS1	ENSSSCG00000008991	snv
	15	69551755	AC	A	0.441667	WZS01853-ZF3_153-sgRNACas9-KO-	control_CRISPR	somatic	intron_variant	MODIFIER	KCNH7	ENSSSCG00000015898	indel
	14	19914564	T	G	0.571429	WZS01853-ZF3_153-sgRNACas9-KO-	control_CRISPR	somatic	intron_variant	MODIFIER	MFAP3L	ENSSSCG00000009709	snv
	6	145680250	G	T	0.245455	WZS01853-ZF3_153-sgRNACas9-KO-	control_CRISPR	somatic	5_prime_UTR_variant	MODIFIER	MIER1	ENSSSCG00000030423	snv
	7	115807932	C	A	0.454545	WZS01853-ZF3_153-sgRNACas9-KO-	control_CRISPR	somatic	intron_variant	MODIFIER	SERPINA5	ENSSSCG00000002481	snv
	3	88759968	A	C	0.504348	WZS01853-ZF3_153-sgRNACas9-KO-	control_CRISPR	somatic	intergenic_region	MODIFIER	ENSSSCG00000042900-ENSSSCG00000051467	ENSSSCG00000042900-ENSSSCG00000051467	snv
	9	43217879	C	T	0.615385	WZS01853-ZF3_153-sgRNACas9-KO-	control_CRISPR	somatic	downstream_gene_variant	MODIFIER	RNaseP_nuc	ENSSSCG00000049753	snv
	14	93492350	T	G	0.518519	WZS01853-ZF3_153-sgRNACas9-KO-	control_CRISPR	somatic	intergenic_region	MODIFIER	ENSSSCG00000044126-ENSSSCG00000045253	ENSSSCG00000044126-ENSSSCG00000045253	snv
	13	96341176	G	A	0.449664	WZS01853-ZF3_153-sgRNACas9-KO-	control_CRISPR	somatic	intron_variant	MODIFIER	KCNAB1	ENSSSCG00000025810	snv
	14	93102253	T	A	0.5	WZS01853-ZF3_153-sgRNACas9-KO-	control_CRISPR	somatic	intergenic_region	MODIFIER	ENSSSCG00000046973-ENSSSCG00000044916	ENSSSCG00000046973-ENSSSCG00000044916	snv
	2	54148935	C	A	0.270833	WZS01853-ZF3_153-sgRNACas9-KO-	control_CRISPR	somatic	intergenic_region	MODIFIER	ENSSSCG00000043558-ENSSSCG00000044135	ENSSSCG00000043558-ENSSSCG00000044135	snv
	2	139937320	T	C	0.426357	WZS01853-ZF3_153-sgRNACas9-KO-	control_CRISPR	somatic	intron_variant	MODIFIER	PKD2L2	ENSSSCG00000026421	snv
	7	79208737	A	G	0.307971	WZS01853-ZF3_153-sgRNACas9-KO-	control_CRISPR	somatic	intergenic_region	MODIFIER	ENSSSCG00000039694-ENSSSCG00000035754	ENSSSCG00000039694-ENSSSCG00000035754	snv
	8	63975194	A	C	0.579439	WZS01853-ZF3_153-sgRNACas9-KO-	control_CRISPR	somatic	intergenic_region	MODIFIER	EPHA5-ENSSSCG00000049899	ENSSSCG00000008919-ENSSSCG00000049899	snv
	9	114977707	A	G	0.382353	WZS01853-ZF3_153-sgRNACas9-KO-	control_CRISPR	somatic	intron_variant	MODIFIER	SUCO	ENSSSCG00000015485	snv
	8	15020943	A	G	0.455285	WZS01853-ZF3_153-sgRNACas9-KO-	control_CRISPR	somatic	intron_variant	MODIFIER	SLIT2	ENSSSCG00000008749	snv
	1	80628821	C	A	0.528302	WZS01853-ZF3_153-sgRNACas9-KO-	control_CRISPR	somatic	intron_variant	MODIFIER	ENSSSCG00000044366	ENSSSCG00000044366	snv
	9	128154464	T	A	0.488	WZS01853-ZF3_153-sgRNACas9-KO-	control_CRISPR	somatic	intron_variant	MODIFIER	PLA2G4A	ENSSSCG00000023351	snv
	7	25824219	T	C	0.538961	WZS01853-ZF3_153-sgRNACas9-KO-	control_CRISPR	somatic	downstream_gene_variant	MODIFIER	HCRTR2	ENSSSCG00000001481	snv
	9	79989309	T	A	0.639344	WZS01853-ZF3_153-sgRNACas9-KO-	control_CRISPR	somatic	intergenic_region	MODIFIER	ENSSSCG00000051507-ENSSSCG00000051543	ENSSSCG00000051507-ENSSSCG00000051543	snv
	16	62514851	T	C	0.494624	WZS01853-ZF3_153-sgRNACas9-KO-	control_CRISPR	somatic	intergenic_region	MODIFIER	ENSSSCG00000044310-ATP10B	ENSSSCG00000044310-ENSSSCG00000021527	snv
	14	134654143	C	T	0.333333	WZS01853-ZF3_153-sgRNACas9-KO-	control_CRISPR	somatic	intergenic_region	MODIFIER	ENSSSCG00000045428-ENSSSCG00000045568	ENSSSCG00000045428-ENSSSCG00000045568	snv
	16	43244487	C	G	0.648438	WZS01853-ZF3_153-sgRNACas9-KO-	control_CRISPR	somatic	intergenic_region	MODIFIER	RGS7BP-SHISAL2B	ENSSSCG00000033581-ENSSSCG00000024514	snv
	8	95121335	T	C	0.2	WZS01853-ZF3_153-sgRNACas9-KO-	control_CRISPR	somatic	intergenic_region	MODIFIER	U4-ENSSSCG00000043290	ENSSSCG00000019267-ENSSSCG00000043290	snv
	7	105513491	TG	T	0.491935	WZS01853-ZF3_153-sgRNACas9-KO-	control_CRISPR	somatic	intergenic_region	MODIFIER	ENSSSCG00000047447-ENSSSCG00000047467	ENSSSCG00000047447-ENSSSCG00000047467	indel
	4	62762425	T	C	0.439024	WZS01853-ZF3_153-sgRNACas9-KO-	control_CRISPR	somatic	intron_variant	MODIFIER	SBSPON	ENSSSCG00000006183	snv
	1	153217817	T	C	0.211679	WZS01853-ZF3_153-sgRNACas9-KO-	control_CRISPR	somatic	intron_variant	MODIFIER	DOK6	ENSSSCG00000028977	snv
	2	55180498	A	T	0.481818	WZS01853-ZF3_153-sgRNACas9-KO-	control_CRISPR	somatic	intergenic_region	MODIFIER	ENSSSCG00000037896-ENSSSCG00000036934	ENSSSCG00000037896-ENSSSCG00000036934	snv
	6	115146328	A	T	0.527607	WZS01853-ZF3_153-sgRNACas9-KO-	control_CRISPR	somatic	intergenic_region	MODIFIER	DSC1-DSG1	ENSSSCG00000003726-ENSSSCG00000020694	snv
	4	53323628	T	C	0.45	WZS01853-ZF3_153-sgRNACas9-KO-	control_CRISPR	somatic	intergenic_region	MODIFIER	ENSSSCG00000049545-ENSSSCG00000048719	ENSSSCG00000049545-ENSSSCG00000048719	snv
	7	25824142	A	G	0.503401	WZS01853-ZF3_153-sgRNACas9-KO-	control_CRISPR	somatic	downstream_gene_variant	MODIFIER	HCRTR2	ENSSSCG00000001481	snv
	7	109234593	A	G	0.587413	WZS01853-ZF3_153-sgRNACas9-KO-	control_CRISPR	somatic	intergenic_region	MODIFIER	ENSSSCG00000046538-ENSSSCG00000042684	ENSSSCG00000046538-ENSSSCG00000042684	snv
	1	231709529	T	C	0.503937	WZS01853-ZF3_153-sgRNACas9-KO-	control_CRISPR	somatic	intergenic_region	MODIFIER	PSAT1-ENSSSCG00000041713	ENSSSCG00000005287-ENSSSCG00000041713	snv
	1	198922317	G	T	0.504762	WZS01853-ZF3_153-sgRNACas9-KO-	control_CRISPR	somatic	intergenic_region	MODIFIER	U6-ELAVL2	ENSSSCG00000033275-ENSSSCG00000005130	snv
	6	24240860	C	A	0.460317	WZS01853-ZF3_153-sgRNACas9-KO-	control_CRISPR	somatic	intergenic_region	MODIFIER	ENSSSCG00000047287-ENSSSCG00000041084	ENSSSCG00000047287-ENSSSCG00000041084	snv
	13	128378295	C	A	0.517544	WZS01853-ZF3_153-sgRNACas9-KO-	control_CRISPR	somatic	intergenic_region	MODIFIER	ENSSSCG00000043779-OSTN	ENSSSCG00000043779-ENSSSCG00000031478	snv
	9	32093356	T	C	0.443478	WZS01853-ZF3_153-sgRNACas9-KO-	control_CRISPR	somatic	intron_variant	MODIFIER	PGR	ENSSSCG00000014977	snv
	4	13053617	T	G	0.408	WZS01853-ZF3_153-sgRNACas9-KO-	control_CRISPR	somatic	intron_variant	MODIFIER	ENSSSCG00000049874	ENSSSCG00000049874	snv
	15	123008060	T	C	0.464912	WZS01853-ZF3_153-sgRNACas9-KO-	control_CRISPR	somatic	upstream_gene_variant	MODIFIER	ENSSSCG00000044791	ENSSSCG00000044791	snv
	6	22931709	T	C	0.543478	WZS01853-ZF3_153-sgRNACas9-KO-	control_CRISPR	somatic	intron_variant	MODIFIER	CDH8	ENSSSCG00000040687	snv
	1	212999591	T	C	0.459259	WZS01853-ZF3_153-sgRNACas9-KO-	control_CRISPR	somatic	intergenic_region	MODIFIER	ENSSSCG00000048293-ENSSSCG00000041358	ENSSSCG00000048293-ENSSSCG00000041358	snv
	15	98354504	G	A	0.441441	WZS01853-ZF3_153-sgRNACas9-KO-	control_CRISPR	somatic	intergenic_region	MODIFIER	U2-ENSSSCG00000046893	ENSSSCG00000049246-ENSSSCG00000046893	snv
	1	97254664	C	A	0.489011	WZS01853-ZF3_153-sgRNACas9-KO-	control_CRISPR	somatic	intergenic_region	MODIFIER	SKOR2-SMAD2	ENSSSCG00000005767-ENSSSCG00000004505	snv
	7	82730271	G	C	0.529412	WZS01853-ZF3_153-sgRNACas9-KO-	control_CRISPR	somatic	intergenic_region	MODIFIER	ENSSSCG00000051077-ENSSSCG00000045763	ENSSSCG00000051077-ENSSSCG00000045763	snv
	7	63237147	A	C	0.494505	WZS01853-ZF3_153-sgRNACas9-KO-	control_CRISPR	somatic	intron_variant	MODIFIER	SLC25A21	ENSSSCG00000039317	snv
	8	24823895	C	G	0.413793	WZS01853-ZF3_153-sgRNACas9-KO-	control_CRISPR	somatic	intergenic_region	MODIFIER	PCDH7-ENSSSCG00000008767	ENSSSCG00000008765-ENSSSCG00000008767	snv
	11	35036972	T	C	0.553191	WZS01853-ZF3_153-sgRNACas9-KO-	control_CRISPR	somatic	intergenic_region	MODIFIER	ENSSSCG00000043875-ENSSSCG00000051718	ENSSSCG00000043875-ENSSSCG00000051718	snv
	4	103183724	G	A	0.496894	WZS01853-ZF3_153-sgRNACas9-KO-	control_CRISPR	somatic	intergenic_region	MODIFIER	TENT5C-MAN1A2	ENSSSCG00000006729-ENSSSCG00000006730	snv
	15	62978242	C	A	0.446281	WZS01853-ZF3_153-sgRNACas9-KO-	control_CRISPR	somatic	intergenic_region	MODIFIER	ENSSSCG00000048898-U6	ENSSSCG00000048898-ENSSSCG00000034643	snv
	15	13933208	G	A	0.446154	WZS01853-ZF3_153-sgRNACas9-KO-	control_CRISPR	somatic	intergenic_region	MODIFIER	ENSSSCG00000037083-THSD7B	ENSSSCG00000037083-ENSSSCG00000040172	snv
	2	54251366	G	T	0.522581	WZS01853-ZF3_153-sgRNACas9-KO-	control_CRISPR	somatic	downstream_gene_variant	MODIFIER	ENSSSCG00000043027	ENSSSCG00000043027	snv
	4	60032068	T	C	0.469027	WZS01853-ZF3_153-sgRNACas9-KO-	control_CRISPR	somatic	intergenic_region	MODIFIER	ENSSSCG00000045839-ENSSSCG00000045867	ENSSSCG00000045839-ENSSSCG00000045867	snv
	3	39963132	A	G	0.254545	WZS01853-ZF3_153-sgRNACas9-KO-	control_CRISPR	somatic	synonymous_variant	LOW	ZNF598	ENSSSCG00000023400	snv
	4	59795785	A	T	0.590604	WZS01853-ZF3_153-sgRNACas9-KO-	control_CRISPR	somatic	intergenic_region	MODIFIER	ENSSSCG00000045839-ENSSSCG00000045867	ENSSSCG00000045839-ENSSSCG00000045867	snv
	14	98342260	T	C	0.584746	WZS01853-ZF3_153-sgRNACas9-KO-	control_CRISPR	somatic	intron_variant	MODIFIER	PRKG1	ENSSSCG00000010429	snv
	16	62479224	C	A	0.242236	WZS01853-ZF3_153-sgRNACas9-KO-	control_CRISPR	somatic	intergenic_region	MODIFIER	ENSSSCG00000044310-ATP10B	ENSSSCG00000044310-ENSSSCG00000021527	snv
	2	648046	C	T	0.532468	WZS01853-ZF3_153-sgRNACas9-KO-	control_CRISPR	somatic	intron_variant	MODIFIER	ENSSSCG00000012835	ENSSSCG00000012835	snv
	15	29904788	A	G	0.448276	WZS01853-ZF3_153-sgRNACas9-KO-	control_CRISPR	somatic	intron_variant	MODIFIER	CLASP1	ENSSSCG00000039157	snv
	4	26508512	A	C	0.45	WZS01853-ZF3_153-sgRNACas9-KO-	control_CRISPR	somatic	intergenic_region	MODIFIER	ENSSSCG00000050153-ENSSSCG00000050139	ENSSSCG00000050153-ENSSSCG00000050139	snv
	8	27902163	T	G	0.469799	WZS01853-ZF3_153-sgRNACas9-KO-	control_CRISPR	somatic	intron_variant	MODIFIER	ARAP2	ENSSSCG00000008768	snv
	15	116514188	A	C	0.482993	WZS01853-ZF3_153-sgRNACas9-KO-	control_CRISPR	somatic	intron_variant	MODIFIER	SPAG16	ENSSSCG00000016166	snv
	9	30695344	C	A	0.539823	WZS01853-ZF3_153-sgRNACas9-KO-	control_CRISPR	somatic	intergenic_region	MODIFIER	ENSSSCG00000045634-CNTN5	ENSSSCG00000045634-ENSSSCG00000014975	snv
	12	56880587	G	T	0.274809	WZS01853-ZF3_153-sgRNACas9-KO-	control_CRISPR	somatic	intron_variant	MODIFIER	ENSSSCG00000038836	ENSSSCG00000038836	snv
	13	106043260	C	A	0.568493	WZS01853-ZF3_153-sgRNACas9-KO-	control_CRISPR	somatic	intergenic_region	MODIFIER	ENSSSCG00000033350-ZBBX	ENSSSCG00000033350-ENSSSCG00000023393	snv
	1	27748446	A	AAAAC	0.4625	WZS01853-ZF3_153-sgRNACas9-KO-	control_CRISPR	somatic	intron_variant	MODIFIER	MAP7	ENSSSCG00000039049	indel
	15	54398122	C	T	0.535032	WZS01853-ZF3_153-sgRNACas9-KO-	control_CRISPR	somatic	intron_variant	MODIFIER	GSR	ENSSSCG00000015844	snv
	14	12272071	C	T	0.347368	WZS01853-ZF3_153-sgRNACas9-KO-	control_CRISPR	somatic	missense_variant	MODERATE	ZNF395	ENSSSCG00000009676	snv
	1	128521757	C	A	0.480519	WZS01853-ZF3_153-sgRNACas9-KO-	control_CRISPR	somatic	intron_variant	MODIFIER	TTBK2	ENSSSCG00000004718	snv
	9	20890976	G	A	0.462121	WZS01853-ZF3_153-sgRNACas9-KO-	control_CRISPR	somatic	intron_variant	MODIFIER	TMEM135	ENSSSCG00000035619	snv
	13	82224969	GA	G	0.45283	WZS01853-ZF3_153-sgRNACas9-KO-	control_CRISPR	somatic	intergenic_region	MODIFIER	ZBTB38-RASA2	ENSSSCG00000022073-ENSSSCG00000011672	indel
	11	57263632	T	G	0.469136	WZS01853-ZF3_153-sgRNACas9-KO-	control_CRISPR	somatic	intergenic_region	MODIFIER	SLITRK6-ENSSSCG00000033995	ENSSSCG00000009486-ENSSSCG00000033995	snv
	1	210916559	T	G	0.417391	WZS01853-ZF3_153-sgRNACas9-KO-	control_CRISPR	somatic	intergenic_region	MODIFIER	ENSSSCG00000048974-ENSSSCG00000047464	ENSSSCG00000048974-ENSSSCG00000047464	snv
	3	11986592	G	A	0.557252	WZS01853-ZF3_153-sgRNACas9-KO-	control_CRISPR	somatic	intron_variant	MODIFIER	ENSSSCG00000024045	ENSSSCG00000024045	snv
	6	21114302	C	T	0.554795	WZS01853-ZF3_153-sgRNACas9-KO-	control_CRISPR	somatic	intergenic_region	MODIFIER	ENSSSCG00000045312-ENSSSCG00000044968	ENSSSCG00000045312-ENSSSCG00000044968	snv
	10	5946089	C	A	0.507576	WZS01853-ZF3_153-sgRNACas9-KO-	control_CRISPR	somatic	intergenic_region	MODIFIER	KCTD3-ENSSSCG00000038066	ENSSSCG00000010811-ENSSSCG00000038066	snv
	14	10869756	C	A	0.509091	WZS01853-ZF3_153-sgRNACas9-KO-	control_CRISPR	somatic	intergenic_region	MODIFIER	ssc-mir-9854-ENSSSCG00000044506	ENSSSCG00000047514-ENSSSCG00000044506	snv
	8	111831563	C	T	0.223602	WZS01853-ZF3_153-sgRNACas9-KO-	control_CRISPR	somatic	intron_variant	MODIFIER	ELOVL6	ENSSSCG00000036236	snv
	3	65366489	T	C	0.53125	WZS01853-ZF3_153-sgRNACas9-KO-	control_CRISPR	somatic	intergenic_region	MODIFIER	U1-ENSSSCG00000042171	ENSSSCG00000036252-ENSSSCG00000042171	snv
	8	36727132	T	G	0.448	WZS01853-ZF3_153-sgRNACas9-KO-	control_CRISPR	somatic	intergenic_region	MODIFIER	GABRA2-U6	ENSSSCG00000028922-ENSSSCG00000018534	snv
	8	10739234	T	C	0.435115	WZS01853-ZF3_153-sgRNACas9-KO-	control_CRISPR	somatic	intron_variant	MODIFIER	C1QTNF7	ENSSSCG00000008737	snv
	1	121416871	T	C	0.616667	WZS01853-ZF3_153-sgRNACas9-KO-	control_CRISPR	somatic	intron_variant	MODIFIER	GABPB1	ENSSSCG00000004645	snv
	1	215571367	G	T	0.480315	WZS01853-ZF3_153-sgRNACas9-KO-	control_CRISPR	somatic	upstream_gene_variant	MODIFIER	ENSSSCG00000042624	ENSSSCG00000042624	snv
	8	22342611	T	C	0.508197	WZS01853-ZF3_153-sgRNACas9-KO-	control_CRISPR	somatic	intergenic_region	MODIFIER	ENSSSCG00000050984-ENSSSCG00000046430	ENSSSCG00000050984-ENSSSCG00000046430	snv
	1	214204837	A	G	0.514019	WZS01853-ZF3_153-sgRNACas9-KO-	control_CRISPR	somatic	downstream_gene_variant	MODIFIER	ENSSSCG00000045828	ENSSSCG00000045828	snv
	9	25064778	G	A	0.466667	WZS01853-ZF3_153-sgRNACas9-KO-	control_CRISPR	somatic	intergenic_region	MODIFIER	ENSSSCG00000045215-ENSSSCG00000014935	ENSSSCG00000045215-ENSSSCG00000014935	snv
	13	62601997	C	G	0.413043	WZS01853-ZF3_153-sgRNACas9-KO-	control_CRISPR	somatic	intergenic_region	MODIFIER	ENSSSCG00000042277-GRM7	ENSSSCG00000042277-ENSSSCG00000023891	snv
	4	119347057	C	T	0.514085	WZS01853-ZF3_153-sgRNACas9-KO-	control_CRISPR	somatic	intron_variant	MODIFIER	ENSSSCG00000049714	ENSSSCG00000049714	snv
	8	58104214	A	C	0.435644	WZS01853-ZF3_153-sgRNACas9-KO-	control_CRISPR	somatic	intergenic_region	MODIFIER	ENSSSCG00000043708-ENSSSCG00000049845	ENSSSCG00000043708-ENSSSCG00000049845	snv
	11	76672949	G	T	0.423423	WZS01853-ZF3_153-sgRNACas9-KO-	control_CRISPR	somatic	intergenic_region	MODIFIER	IRS2-ENSSSCG00000045598	ENSSSCG00000034763-ENSSSCG00000045598	snv
	1	65787320	G	A	0.517647	WZS01853-ZF3_153-sgRNACas9-KO-	control_CRISPR	somatic	intron_variant	MODIFIER	ENSSSCG00000047992	ENSSSCG00000047992	snv
	17	56493286	C	A	0.528926	WZS01853-ZF3_153-sgRNACas9-KO-	control_CRISPR	somatic	intergenic_region	MODIFIER	ENSSSCG00000041002-CBLN4	ENSSSCG00000041002-ENSSSCG00000007490	snv
	1	169068276	T	C	0.290323	WZS01853-ZF3_153-sgRNACas9-KO-	control_CRISPR	somatic	intron_variant	MODIFIER	THSD4	ENSSSCG00000004980	snv
	5	47530047	G	T	0.464286	WZS01853-ZF3_153-sgRNACas9-KO-	control_CRISPR	somatic	intergenic_region	MODIFIER	ITPR2-SSPN	ENSSSCG00000000555-ENSSSCG00000025531	snv
	6	38581539	T	G	0.466667	WZS01853-ZF3_153-sgRNACas9-KO-	control_CRISPR	somatic	intergenic_region	MODIFIER	U6-ENSSSCG00000044959	ENSSSCG00000032627-ENSSSCG00000044959	snv
	13	185820675	T	C	0.52459	WZS01853-ZF3_153-sgRNACas9-KO-	control_CRISPR	somatic	intergenic_region	MODIFIER	NCAM2-U6	ENSSSCG00000012020-ENSSSCG00000018744	snv
	6	154485882	T	C	0.534884	WZS01853-ZF3_153-sgRNACas9-KO-	control_CRISPR	somatic	intron_variant	MODIFIER	ENSSSCG00000041035	ENSSSCG00000041035	snv
	4	3660147	G	T	0.389381	WZS01853-ZF3_153-sgRNACas9-KO-	control_CRISPR	somatic	intergenic_region	MODIFIER	KCNK9-ENSSSCG00000044699	ENSSSCG00000033397-ENSSSCG00000044699	snv
	17	22936728	G	GT	0.47541	WZS01853-ZF3_153-sgRNACas9-KO-	control_CRISPR	somatic	downstream_gene_variant	MODIFIER	FLRT3	ENSSSCG00000007079	indel
	3	121327394	C	A	0.508333	WZS01853-ZF3_153-sgRNACas9-KO-	control_CRISPR	somatic	intergenic_region	MODIFIER	FAM49A-ENSSSCG00000043156	ENSSSCG00000008617-ENSSSCG00000043156	snv
	8	73896902	C	A	0.482759	WZS01853-ZF3_153-sgRNACas9-KO-	control_CRISPR	somatic	intron_variant	MODIFIER	FRAS1	ENSSSCG00000008991	snv
	1	68121360	C	T	0.651685	WZS01853-ZF3_153-sgRNACas9-KO-	control_CRISPR	somatic	intron_variant	MODIFIER	GRIK2	ENSSSCG00000004361	snv
	17	21218177	T	C	0.495935	WZS01853-ZF3_153-sgRNACas9-KO-	control_CRISPR	somatic	intergenic_region	MODIFIER	BTBD3-SPTLC3	ENSSSCG00000020853-ENSSSCG00000007072	snv
	1	60225675	A	C	0.525316	WZS01853-ZF3_153-sgRNACas9-KO-	control_CRISPR	somatic	intergenic_region	MODIFIER	ENSSSCG00000048181-U2	ENSSSCG00000048181-ENSSSCG00000042748	snv
	3	57655282	T	C	0.314815	WZS01853-ZF3_153-sgRNACas9-KO-	control_CRISPR	somatic	intergenic_region	MODIFIER	FOXI3-THNSL2	ENSSSCG00000036354-ENSSSCG00000025106	snv
	4	49837264	T	A	0.451923	WZS01853-ZF3_153-sgRNACas9-KO-	control_CRISPR	somatic	intron_variant	MODIFIER	CNBD1	ENSSSCG00000036161	snv
	8	62068262	T	G	0.516949	WZS01853-ZF3_153-sgRNACas9-KO-	control_CRISPR	somatic	intergenic_region	MODIFIER	ENSSSCG00000047276-TECRL	ENSSSCG00000047276-ENSSSCG00000024681	snv
	8	86779982	G	A	0.333333	WZS01853-ZF3_153-sgRNACas9-KO-	control_CRISPR	somatic	intergenic_region	MODIFIER	SCOC-ENSSSCG00000048695	ENSSSCG00000038550-ENSSSCG00000048695	snv
	13	57759478	T	C	0.442478	WZS01853-ZF3_153-sgRNACas9-KO-	control_CRISPR	somatic	intron_variant	MODIFIER	CNTN6	ENSSSCG00000038152	snv
	14	52725220	A	T	0.54902	WZS01853-ZF3_153-sgRNACas9-KO-	control_CRISPR	somatic	intergenic_region	MODIFIER	ENSSSCG00000050944-ENSSSCG00000041314	ENSSSCG00000050944-ENSSSCG00000041314	snv
	10	35684807	A	G	0.55303	WZS01853-ZF3_153-sgRNACas9-KO-	control_CRISPR	somatic	intron_variant	MODIFIER	ENSSSCG00000032000	ENSSSCG00000032000	snv
	15	50387987	C	A	0.52381	WZS01853-ZF3_153-sgRNACas9-KO-	control_CRISPR	somatic	intron_variant	MODIFIER	UNC5D	ENSSSCG00000015830	snv
	7	86899302	C	A	0.447154	WZS01853-ZF3_153-sgRNACas9-KO-	control_CRISPR	somatic	intron_variant	MODIFIER	SLCO3A1	ENSSSCG00000002263	snv
	8	121182116	A	G	0.503401	WZS01853-ZF3_153-sgRNACas9-KO-	control_CRISPR	somatic	intron_variant	MODIFIER	C4orf17	ENSSSCG00000009181	snv
	7	96196467	T	G	0.584746	WZS01853-ZF3_153-sgRNACas9-KO-	control_CRISPR	somatic	intron_variant	MODIFIER	DPF3	ENSSSCG00000002333	snv
	8	137090615	C	A	0.459016	WZS01853-ZF3_153-sgRNACas9-KO-	control_CRISPR	somatic	intron_variant	MODIFIER	CFAP299	ENSSSCG00000037723	snv
	3	58666218	A	C	0.47619	WZS01853-ZF3_153-sgRNACas9-KO-	control_CRISPR	somatic	upstream_gene_variant	MODIFIER	POLR1A	ENSSSCG00000008226	snv
	15	62118328	G	T	0.568182	WZS01853-ZF3_153-sgRNACas9-KO-	control_CRISPR	somatic	intergenic_region	MODIFIER	GALNT13-ENSSSCG00000046101	ENSSSCG00000022671-ENSSSCG00000046101	snv
	18	54374582	G	C	0.465116	WZS01853-ZF3_153-sgRNACas9-KO-	control_CRISPR	somatic	intron_variant	MODIFIER	CDK13	ENSSSCG00000016769	snv
	5	26839638	CT	C	0.590909	WZS01853-ZF3_153-sgRNACas9-KO-	control_CRISPR	somatic	intergenic_region	MODIFIER	TAFA2-ENSSSCG00000041120	ENSSSCG00000034686-ENSSSCG00000041120	indel
	1	212114221	G	T	0.484127	WZS01853-ZF3_153-sgRNACas9-KO-	control_CRISPR	somatic	intergenic_region	MODIFIER	ENSSSCG00000041506-ENSSSCG00000047172	ENSSSCG00000041506-ENSSSCG00000047172	snv
	13	145152947	A	T	0.210938	WZS01853-ZF3_153-sgRNACas9-KO-	control_CRISPR	somatic	intron_variant	MODIFIER	ZBTB20	ENSSSCG00000026113	snv
	3	31587403	T	C	0.394366	WZS01853-ZF3_153-sgRNACas9-KO-	control_CRISPR	somatic	intergenic_region	MODIFIER	LITAF-ENSSSCG00000007899	ENSSSCG00000032381-ENSSSCG00000007899	snv
	2	110521026	A	C	0.49	WZS01853-ZF3_153-sgRNACas9-KO-	control_CRISPR	somatic	intergenic_region	MODIFIER	ENSSSCG00000046742-ENSSSCG00000049953	ENSSSCG00000046742-ENSSSCG00000049953	snv
	10	42514949	AC	A	0.534884	WZS01853-ZF3_153-sgRNACas9-KO-	control_CRISPR	somatic	intron_variant	MODIFIER	ARHGAP12	ENSSSCG00000011026	indel
	8	57305951	A	C	0.553957	WZS01853-ZF3_153-sgRNACas9-KO-	control_CRISPR	somatic	intergenic_region	MODIFIER	ENSSSCG00000044641-ENSSSCG00000048199	ENSSSCG00000044641-ENSSSCG00000048199	snv
	9	112225910	C	A	0.582609	WZS01853-ZF3_153-sgRNACas9-KO-	control_CRISPR	somatic	intergenic_region	MODIFIER	ENSSSCG00000048608-ENSSSCG00000045606	ENSSSCG00000048608-ENSSSCG00000045606	snv
	4	86206128	C	A	0.454545	WZS01853-ZF3_153-sgRNACas9-KO-	control_CRISPR	somatic	intergenic_region	MODIFIER	PBX1-ENSSSCG00000048174	ENSSSCG00000006331-ENSSSCG00000048174	snv
	11	32816383	T	G	0.516667	WZS01853-ZF3_153-sgRNACas9-KO-	control_CRISPR	somatic	intron_variant	MODIFIER	DIAPH3	ENSSSCG00000009448	snv
	9	88646650	G	GAT	0.511628	WZS01853-ZF3_153-sgRNACas9-KO-	control_CRISPR	somatic	intergenic_region	MODIFIER	ENSSSCG00000044171-ENSSSCG00000042617	ENSSSCG00000044171-ENSSSCG00000042617	indel
	1	96659092	G	T	0.277228	WZS01853-ZF3_153-sgRNACas9-KO-	control_CRISPR	somatic	intron_variant	MODIFIER	KATNAL2	ENSSSCG00000022643	snv
	16	6788136	C	T	0.44	WZS01853-ZF3_153-sgRNACas9-KO-	control_CRISPR	somatic	intergenic_region	MODIFIER	ENSSSCG00000051524-ENSSSCG00000043590	ENSSSCG00000051524-ENSSSCG00000043590	snv
	2	109939353	C	A	0.548077	WZS01853-ZF3_153-sgRNACas9-KO-	control_CRISPR	somatic	intergenic_region	MODIFIER	ENSSSCG00000043979-U6	ENSSSCG00000043979-ENSSSCG00000023111	snv
	13	109906893	T	C	0.439655	WZS01853-ZF3_153-sgRNACas9-KO-	control_CRISPR	somatic	intron_variant	MODIFIER	TNIK	ENSSSCG00000028905	snv
	11	9681013	C	A	0.408284	WZS01853-ZF3_153-sgRNACas9-KO-	control_CRISPR	somatic	intron_variant	MODIFIER	ENSSSCG00000046579	ENSSSCG00000046579	snv
	1	48515772	CA	C	0.412214	WZS01853-ZF3_153-sgRNACas9-KO-	control_CRISPR	somatic	intergenic_region	MODIFIER	ENSSSCG00000050497-ENSSSCG00000047735	ENSSSCG00000050497-ENSSSCG00000047735	indel
	3	25376863	G	T	0.471338	WZS01853-ZF3_153-sgRNACas9-KO-	control_CRISPR	somatic	intron_variant	MODIFIER	ENSSSCG00000007858	ENSSSCG00000007858	snv
	13	179116800	TA	T	0.536842	WZS01853-ZF3_153-sgRNACas9-KO-	control_CRISPR	somatic	intergenic_region	MODIFIER	ROBO2-LIPI	ENSSSCG00000012002-ENSSSCG00000012004	indel
	4	5978724	C	T	0.590909	WZS01853-ZF3_153-sgRNACas9-KO-	control_CRISPR	somatic	intergenic_region	MODIFIER	ENSSSCG00000049175-ENSSSCG00000045100	ENSSSCG00000049175-ENSSSCG00000045100	snv
	1	155190363	G	A	0.536913	WZS01853-ZF3_153-sgRNACas9-KO-	control_CRISPR	somatic	intergenic_region	MODIFIER	DSEL-U6	ENSSSCG00000035941-ENSSSCG00000019193	snv
	15	88772114	G	A	0.433333	WZS01853-ZF3_153-sgRNACas9-KO-	control_CRISPR	somatic	intergenic_region	MODIFIER	ENSSSCG00000018653-ENSSSCG00000041548	ENSSSCG00000018653-ENSSSCG00000041548	snv
	13	170848785	A	T	0.504505	WZS01853-ZF3_153-sgRNACas9-KO-	control_CRISPR	somatic	intergenic_region	MODIFIER	CADM2-ENSSSCG00000049210	ENSSSCG00000011999-ENSSSCG00000049210	snv
	1	257119711	G	A	0.528986	WZS01853-ZF3_153-sgRNACas9-KO-	control_CRISPR	somatic	intron_variant	MODIFIER	ASTN2	ENSSSCG00000005502	snv
	2	39173603	T	C	0.466667	WZS01853-ZF3_153-sgRNACas9-KO-	control_CRISPR	somatic	intron_variant	MODIFIER	HTATIP2	ENSSSCG00000013349	snv
	15	125817766	T	G	0.160714	WZS01853-ZF3_153-sgRNACas9-KO-	control_CRISPR	somatic	upstream_gene_variant	MODIFIER	ENSSSCG00000048149	ENSSSCG00000048149	snv
	5	52485598	A	G	0.469697	WZS01853-ZF3_153-sgRNACas9-KO-	control_CRISPR	somatic	intron_variant	MODIFIER	PDE3A	ENSSSCG00000028662	snv
	2	124445227	G	T	0.264516	WZS01853-ZF3_153-sgRNACas9-KO-	control_CRISPR	somatic	intron_variant	MODIFIER	PRR16	ENSSSCG00000039760	snv
	8	58457737	T	G	0.515625	WZS01853-ZF3_153-sgRNACas9-KO-	control_CRISPR	somatic	intergenic_region	MODIFIER	ENSSSCG00000049845-ENSSSCG00000048506	ENSSSCG00000049845-ENSSSCG00000048506	snv
	1	174595287	A	G	0.528169	WZS01853-ZF3_153-sgRNACas9-KO-	control_CRISPR	somatic	intergenic_region	MODIFIER	ENSSSCG00000047027-ENSSSCG00000043072	ENSSSCG00000047027-ENSSSCG00000043072	snv
	6	38343489	T	C	0.544444	WZS01853-ZF3_153-sgRNACas9-KO-	control_CRISPR	somatic	intergenic_region	MODIFIER	U6-ENSSSCG00000002850	ENSSSCG00000026738-ENSSSCG00000002850	snv
	18	30282556	G	A	0.616541	WZS01853-ZF3_153-sgRNACas9-KO-	control_CRISPR	somatic	intergenic_region	MODIFIER	ENSSSCG00000051372-U6	ENSSSCG00000051372-ENSSSCG00000018780	snv
	18	35116076	G	A	0.428571	WZS01853-ZF3_153-sgRNACas9-KO-	control_CRISPR	somatic	intergenic_region	MODIFIER	IMMP2L-ENSSSCG00000047859	ENSSSCG00000016650-ENSSSCG00000047859	snv
	11	44194195	T	A	0.536585	WZS01853-ZF3_153-sgRNACas9-KO-	control_CRISPR	somatic	intergenic_region	MODIFIER	DACH1-U6	ENSSSCG00000009457-ENSSSCG00000018387	snv
	5	98450706	C	CA	0.425743	WZS01853-ZF3_153-sgRNACas9-KO-	control_CRISPR	somatic	intergenic_region	MODIFIER	ENSSSCG00000048980-TMTC2	ENSSSCG00000048980-ENSSSCG00000024065	indel
	8	71421580	G	T	0.546099	WZS01853-ZF3_153-sgRNACas9-KO-	control_CRISPR	somatic	intron_variant	MODIFIER	USO1	ENSSSCG00000008971	snv
	9	123147059	T	C	0.480916	WZS01853-ZF3_153-sgRNACas9-KO-	control_CRISPR	somatic	intron_variant	MODIFIER	CACNA1E	ENSSSCG00000015543	snv
	8	16502942	C	T	0.515625	WZS01853-ZF3_153-sgRNACas9-KO-	control_CRISPR	somatic	downstream_gene_variant	MODIFIER	ENSSSCG00000037282	ENSSSCG00000037282	snv
	8	130837388	G	C	0.48855	WZS01853-ZF3_153-sgRNACas9-KO-	control_CRISPR	somatic	intron_variant	MODIFIER	ABCG2	ENSSSCG00000009215	snv
	5	36685735	GA	G	0.459459	WZS01853-ZF3_153-sgRNACas9-KO-	control_CRISPR	somatic	intergenic_region	MODIFIER	TRHDE-U4	ENSSSCG00000000515-ENSSSCG00000044578	indel
	8	27473933	A	C	0.476821	WZS01853-ZF3_153-sgRNACas9-KO-	control_CRISPR	somatic	intergenic_region	MODIFIER	ENSSSCG00000050356-ARAP2	ENSSSCG00000050356-ENSSSCG00000008768	snv
	8	35599367	A	T	0.390625	WZS01853-ZF3_153-sgRNACas9-KO-	control_CRISPR	somatic	intergenic_region	MODIFIER	ENSSSCG00000042027-ENSSSCG00000049434	ENSSSCG00000042027-ENSSSCG00000049434	snv
	12	31164261	G	T	0.295455	WZS01853-ZF3_153-sgRNACas9-KO-	control_CRISPR	somatic	intergenic_region	MODIFIER	ENSSSCG00000047020-TOM1L1	ENSSSCG00000047020-ENSSSCG00000017601	snv
	9	61260579	G	T	0.426087	WZS01853-ZF3_153-sgRNACas9-KO-	control_CRISPR	somatic	intergenic_region	MODIFIER	B3GAT1-SNORA70	ENSSSCG00000015259-ENSSSCG00000020013	snv
	1	155040613	TA	T	0.459677	WZS01853-ZF3_153-sgRNACas9-KO-	control_CRISPR	somatic	intergenic_region	MODIFIER	DSEL-U6	ENSSSCG00000035941-ENSSSCG00000019193	indel
	7	110368315	A	T	0.43	WZS01853-ZF3_153-sgRNACas9-KO-	control_CRISPR	somatic	downstream_gene_variant	MODIFIER	ENSSSCG00000002424	ENSSSCG00000002424	snv
	7	77968947	A	T	0.138889	WZS01853-ZF3_153-sgRNACas9-KO-	control_CRISPR	somatic	missense_variant	MODERATE	ENSSSCG00000038947	ENSSSCG00000038947	snv
	8	64044904	G	A	0.512821	WZS01853-ZF3_153-sgRNACas9-KO-	control_CRISPR	somatic	intergenic_region	MODIFIER	EPHA5-ENSSSCG00000049899	ENSSSCG00000008919-ENSSSCG00000049899	snv
	11	637416	T	C	0.405941	WZS01853-ZF3_153-sgRNACas9-KO-	control_CRISPR	somatic	intergenic_region	MODIFIER	ENSSSCG00000009568-ZMYM2	ENSSSCG00000009568-ENSSSCG00000021814	snv
	16	56015463	T	C	0.446154	WZS01853-ZF3_153-sgRNACas9-KO-	control_CRISPR	somatic	intron_variant	MODIFIER	TENM2	ENSSSCG00000017018	snv
	14	80130002	A	G	0.511628	WZS01853-ZF3_153-sgRNACas9-KO-	control_CRISPR	somatic	intergenic_region	MODIFIER	KCNMA1-DLG5	ENSSSCG00000010325-ENSSSCG00000026268	snv
	3	64532919	T	A	0.492754	WZS01853-ZF3_153-sgRNACas9-KO-	control_CRISPR	somatic	intergenic_region	MODIFIER	ENSSSCG00000008250-ENSSSCG00000037620	ENSSSCG00000008250-ENSSSCG00000037620	snv
	8	105353906	T	C	0.444444	WZS01853-ZF3_153-sgRNACas9-KO-	control_CRISPR	somatic	intron_variant	MODIFIER	NDST3	ENSSSCG00000009115	snv
	18	54374320	C	A	0.485714	WZS01853-ZF3_153-sgRNACas9-KO-	control_CRISPR	somatic	intron_variant	MODIFIER	CDK13	ENSSSCG00000016769	snv
	7	72696840	T	C	0.696429	WZS01853-ZF3_153-sgRNACas9-KO-	control_CRISPR	somatic	intergenic_region	MODIFIER	ENSSSCG00000047746-ENSSSCG00000043341	ENSSSCG00000047746-ENSSSCG00000043341	snv
	14	91287135	A	C	0.567742	WZS01853-ZF3_153-sgRNACas9-KO-	control_CRISPR	somatic	intergenic_region	MODIFIER	ENSSSCG00000047278-CXCL12	ENSSSCG00000047278-ENSSSCG00000034973	snv
	18	11155368	G	T	0.389706	WZS01853-ZF3_153-sgRNACas9-KO-	control_CRISPR	somatic	upstream_gene_variant	MODIFIER	TRIM24	ENSSSCG00000016518	snv
	11	40490825	T	G	0.443478	WZS01853-ZF3_153-sgRNACas9-KO-	control_CRISPR	somatic	intergenic_region	MODIFIER	ENSSSCG00000047489-ENSSSCG00000048977	ENSSSCG00000047489-ENSSSCG00000048977	snv
	9	62080153	C	A	0.582278	WZS01853-ZF3_153-sgRNACas9-KO-	control_CRISPR	somatic	intergenic_region	MODIFIER	ENSSSCG00000051307-GUCY1A2	ENSSSCG00000051307-ENSSSCG00000024613	snv
	1	140968142	C	A	0.203125	WZS01853-ZF3_153-sgRNACas9-KO-	control_CRISPR	somatic	intergenic_region	MODIFIER	GABRB3-ENSSSCG00000032719	ENSSSCG00000038547-ENSSSCG00000032719	snv
	4	100081433	C	A	0.472222	WZS01853-ZF3_153-sgRNACas9-KO-	control_CRISPR	somatic	intergenic_region	MODIFIER	BCL9-ENSSSCG00000033862	ENSSSCG00000006698-ENSSSCG00000033862	snv
	8	27145498	C	G	0.546296	WZS01853-ZF3_153-sgRNACas9-KO-	control_CRISPR	somatic	intergenic_region	MODIFIER	ENSSSCG00000050356-ARAP2	ENSSSCG00000050356-ENSSSCG00000008768	snv
	5	84362101	C	A	0.434426	WZS01853-ZF3_153-sgRNACas9-KO-	control_CRISPR	somatic	intron_variant	MODIFIER	ANKS1B	ENSSSCG00000022083	snv
	14	59162695	T	TA	0.480392	WZS01853-ZF3_153-sgRNACas9-KO-	control_CRISPR	somatic	intron_variant	MODIFIER	EGLN1	ENSSSCG00000010172	indel
	7	77482411	T	C	0.218182	WZS01853-ZF3_153-sgRNACas9-KO-	control_CRISPR	somatic	missense_variant	MODERATE	TRAV3	ENSSSCG00000032592	snv
	8	8434239	C	T	0.554795	WZS01853-ZF3_153-sgRNACas9-KO-	control_CRISPR	somatic	intergenic_region	MODIFIER	ENSSSCG00000039778-ENSSSCG00000035927	ENSSSCG00000039778-ENSSSCG00000035927	snv
	5	41901236	A	G	0.451852	WZS01853-ZF3_153-sgRNACas9-KO-	control_CRISPR	somatic	3_prime_UTR_variant	MODIFIER	BICD1	ENSSSCG00000000531	snv
	6	115854151	G	A	0.45098	WZS01853-ZF3_153-sgRNACas9-KO-	control_CRISPR	somatic	upstream_gene_variant	MODIFIER	RNF125	ENSSSCG00000003729	snv
	18	32376759	T	C	0.570248	WZS01853-ZF3_153-sgRNACas9-KO-	control_CRISPR	somatic	intergenic_region	MODIFIER	ENSSSCG00000048496-ENSSSCG00000042801	ENSSSCG00000048496-ENSSSCG00000042801	snv
	15	135227997	G	T	0.444444	WZS01853-ZF3_153-sgRNACas9-KO-	control_CRISPR	somatic	intergenic_region	MODIFIER	SH3BP4-ENSSSCG00000041172	ENSSSCG00000034692-ENSSSCG00000041172	snv
	15	102143739	T	C	0.547009	WZS01853-ZF3_153-sgRNACas9-KO-	control_CRISPR	somatic	intergenic_region	MODIFIER	ENSSSCG00000048466-ENSSSCG00000049244	ENSSSCG00000048466-ENSSSCG00000049244	snv
	11	42533235	C	T	0.530612	WZS01853-ZF3_153-sgRNACas9-KO-	control_CRISPR	somatic	intergenic_region	MODIFIER	KLHL1-ENSSSCG00000046505	ENSSSCG00000009456-ENSSSCG00000046505	snv
	12	6787094	T	C	0.218391	WZS01853-ZF3_153-sgRNACas9-KO-	control_CRISPR	somatic	missense_variant	MODERATE	KIF19	ENSSSCG00000021724	snv
	13	51692899	T	C	0.448718	WZS01853-ZF3_153-sgRNACas9-KO-	control_CRISPR	somatic	intron_variant	MODIFIER	MDFIC2	ENSSSCG00000040266	snv
	13	36598585	G	T	0.59375	WZS01853-ZF3_153-sgRNACas9-KO-	control_CRISPR	somatic	intron_variant	MODIFIER	CACNA2D3	ENSSSCG00000027019	snv
	5	22559544	G	A	0.208333	WZS01853-ZF3_153-sgRNACas9-KO-	control_CRISPR	somatic	synonymous_variant	LOW	R3HDM2	ENSSSCG00000026498	snv
	1	212576101	CA	C	0.51087	WZS01853-ZF3_153-sgRNACas9-KO-	control_CRISPR	somatic	intergenic_region	MODIFIER	ENSSSCG00000048126-ENSSSCG00000043945	ENSSSCG00000048126-ENSSSCG00000043945	indel
	13	102911910	A	T	0.534247	WZS01853-ZF3_153-sgRNACas9-KO-	control_CRISPR	somatic	intergenic_region	MODIFIER	ENSSSCG00000045945-ENSSSCG00000020451	ENSSSCG00000045945-ENSSSCG00000020451	snv
	4	92393323	G	A	0.561151	WZS01853-ZF3_153-sgRNACas9-KO-	control_CRISPR	somatic	upstream_gene_variant	MODIFIER	ENSSSCG00000006455	ENSSSCG00000006455	snv
	15	125485706	C	A	0.55102	WZS01853-ZF3_153-sgRNACas9-KO-	control_CRISPR	somatic	intergenic_region	MODIFIER	SCG2-ENSSSCG00000041782	ENSSSCG00000023032-ENSSSCG00000041782	snv
	1	91202881	T	G	0.423077	WZS01853-ZF3_153-sgRNACas9-KO-	control_CRISPR	somatic	intergenic_region	MODIFIER	COL12A1-ENSSSCG00000044069	ENSSSCG00000004484-ENSSSCG00000044069	snv
	3	84773867	C	CA	0.454545	WZS01853-ZF3_153-sgRNACas9-KO-	control_CRISPR	somatic	intergenic_region	MODIFIER	ENSSSCG00000050741-CCDC85A	ENSSSCG00000050741-ENSSSCG00000008396	indel
	3	71992856	G	A	0.462687	WZS01853-ZF3_153-sgRNACas9-KO-	control_CRISPR	somatic	intron_variant	MODIFIER	TGFA	ENSSSCG00000008326	snv
	7	52420460	G	T	0.5	WZS01853-ZF3_153-sgRNACas9-KO-	control_CRISPR	somatic	intron_variant	MODIFIER	PDE8A	ENSSSCG00000001810	snv
	8	58677092	A	T	0.482353	WZS01853-ZF3_153-sgRNACas9-KO-	control_CRISPR	somatic	intergenic_region	MODIFIER	ENSSSCG00000048506-ENSSSCG00000049794	ENSSSCG00000048506-ENSSSCG00000049794	snv
	4	92099065	A	C	0.29878	WZS01853-ZF3_153-sgRNACas9-KO-	control_CRISPR	somatic	synonymous_variant	LOW	ENSSSCG00000006452	ENSSSCG00000006452	snv
	6	170333543	C	A	0.535714	WZS01853-ZF3_153-sgRNACas9-KO-	control_CRISPR	somatic	intergenic_region	MODIFIER	ENSSSCG00000033952-ENSSSCG00000046633	ENSSSCG00000033952-ENSSSCG00000046633	snv
	9	110574645	G	C	0.216667	WZS01853-ZF3_153-sgRNACas9-KO-	control_CRISPR	somatic	intergenic_region	MODIFIER	ENSSSCG00000015460-ENSSSCG00000051084	ENSSSCG00000015460-ENSSSCG00000051084	snv
	13	105004497	T	A	0.445255	WZS01853-ZF3_153-sgRNACas9-KO-	control_CRISPR	somatic	intron_variant	MODIFIER	ENSSSCG00000033350	ENSSSCG00000033350	snv
	9	90736252	ACT	A	0.495413	WZS01853-ZF3_153-sgRNACas9-KO-	control_CRISPR	somatic	intron_variant	MODIFIER	DNAH11	ENSSSCG00000015379	indel
	8	623821	G	A	0.602041	WZS01853-ZF3_153-sgRNACas9-KO-	control_CRISPR	somatic	intergenic_region	MODIFIER	NKX1-1-FAM53A	ENSSSCG00000038573-ENSSSCG00000032633	snv
	12	24182395	C	T	0.247788	WZS01853-ZF3_153-sgRNACas9-KO-	control_CRISPR	somatic	3_prime_UTR_variant	MODIFIER	ENSSSCG00000017516	ENSSSCG00000017516	snv
	14	25030623	G	T	0.402174	WZS01853-ZF3_153-sgRNACas9-KO-	control_CRISPR	somatic	intergenic_region	MODIFIER	FZD10-U6	ENSSSCG00000009751-ENSSSCG00000026620	snv
	15	72084114	C	G	0.475524	WZS01853-ZF3_153-sgRNACas9-KO-	control_CRISPR	somatic	intron_variant	MODIFIER	CSRNP3	ENSSSCG00000015906	snv
	5	20147514	G	T	0.5	WZS01853-ZF3_153-sgRNACas9-KO-	control_CRISPR	somatic	upstream_gene_variant	MODIFIER	ENSSSCG00000041361	ENSSSCG00000041361	snv
	7	71433194	C	A	0.39823	WZS01853-ZF3_153-sgRNACas9-KO-	control_CRISPR	somatic	intergenic_region	MODIFIER	ENSSSCG00000045604-ENSSSCG00000044229	ENSSSCG00000045604-ENSSSCG00000044229	snv
	9	80117021	T	C	0.413534	WZS01853-ZF3_153-sgRNACas9-KO-	control_CRISPR	somatic	intergenic_region	MODIFIER	ENSSSCG00000051507-ENSSSCG00000051543	ENSSSCG00000051507-ENSSSCG00000051543	snv
	12	27866111	C	T	0.414286	WZS01853-ZF3_153-sgRNACas9-KO-	control_CRISPR	somatic	intergenic_region	MODIFIER	ENSSSCG00000046104-CA10	ENSSSCG00000046104-ENSSSCG00000023169	snv
	12	30752910	C	T	0.538462	WZS01853-ZF3_153-sgRNACas9-KO-	control_CRISPR	somatic	intergenic_region	MODIFIER	KIF2B-ENSSSCG00000034257	ENSSSCG00000017599-ENSSSCG00000034257	snv
	1	102164593	G	A	0.52459	WZS01853-ZF3_153-sgRNACas9-KO-	control_CRISPR	somatic	intron_variant	MODIFIER	DCC	ENSSSCG00000040836	snv
	6	29463615	G	A	0.641975	WZS01853-ZF3_153-sgRNACas9-KO-	control_CRISPR	somatic	intron_variant	MODIFIER	GNAO1	ENSSSCG00000034192	snv
	7	2630714	G	A	0.384615	WZS01853-ZF3_153-sgRNACas9-KO-	control_CRISPR	somatic	intron_variant	MODIFIER	ENSSSCG00000041051	ENSSSCG00000041051	snv
	3	89951229	G	A	0.51087	WZS01853-ZF3_153-sgRNACas9-KO-	control_CRISPR	somatic	intron_variant	MODIFIER	NRXN1	ENSSSCG00000026180	snv
	4	126234961	A	C	0.524138	WZS01853-ZF3_153-sgRNACas9-KO-	control_CRISPR	somatic	intergenic_region	MODIFIER	U6-ENSSSCG00000043214	ENSSSCG00000023240-ENSSSCG00000043214	snv
	2	54854156	A	G	0.481481	WZS01853-ZF3_153-sgRNACas9-KO-	control_CRISPR	somatic	intergenic_region	MODIFIER	OR2M4-ENSSSCG00000044653	ENSSSCG00000049328-ENSSSCG00000044653	snv
	2	34036464	A	G	0.522388	WZS01853-ZF3_153-sgRNACas9-KO-	control_CRISPR	somatic	intergenic_region	MODIFIER	ENSSSCG00000041023-ENSSSCG00000043436	ENSSSCG00000041023-ENSSSCG00000043436	snv
	1	151258891	T	C	0.427273	WZS01853-ZF3_153-sgRNACas9-KO-	control_CRISPR	somatic	intergenic_region	MODIFIER	CBLN2-ENSSSCG00000044321	ENSSSCG00000020859-ENSSSCG00000044321	snv
	5	23866849	G	T	0.492754	WZS01853-ZF3_153-sgRNACas9-KO-	control_CRISPR	somatic	intergenic_region	MODIFIER	ENSSSCG00000046236-LRIG3	ENSSSCG00000046236-ENSSSCG00000000455	snv
	8	71763167	C	A	0.455882	WZS01853-ZF3_153-sgRNACas9-KO-	control_CRISPR	somatic	intron_variant	MODIFIER	ART3	ENSSSCG00000008976	snv
	13	195636402	G	A	0.458333	WZS01853-ZF3_153-sgRNACas9-KO-	control_CRISPR	somatic	intron_variant	MODIFIER	HUNK	ENSSSCG00000029392	snv
	2	51446004	A	C	0.235955	WZS01853-ZF3_153-sgRNACas9-KO-	control_CRISPR	somatic	synonymous_variant	LOW	ENSSSCG00000034569	ENSSSCG00000034569	snv
	2	25986957	T	G	0.417391	WZS01853-ZF3_153-sgRNACas9-KO-	control_CRISPR	somatic	intergenic_region	MODIFIER	ENSSSCG00000045811-ENSSSCG00000049182	ENSSSCG00000045811-ENSSSCG00000049182	snv
	5	23979773	C	A	0.295455	WZS01853-ZF3_153-sgRNACas9-KO-	control_CRISPR	somatic	intergenic_region	MODIFIER	ENSSSCG00000046236-LRIG3	ENSSSCG00000046236-ENSSSCG00000000455	snv
	3	60360075	GA	G	0.409091	WZS01853-ZF3_153-sgRNACas9-KO-	control_CRISPR	somatic	intergenic_region	MODIFIER	ENSSSCG00000051308-ENSSSCG00000043547	ENSSSCG00000051308-ENSSSCG00000043547	indel
	2	112331443	T	C	0.514286	WZS01853-ZF3_153-sgRNACas9-KO-	control_CRISPR	somatic	intergenic_region	MODIFIER	ENSSSCG00000043847-ENSSSCG00000044646	ENSSSCG00000043847-ENSSSCG00000044646	snv
	14	111913026	C	T	0.185714	WZS01853-ZF3_153-sgRNACas9-KO-	control_CRISPR	somatic	3_prime_UTR_variant	MODIFIER	PAX2	ENSSSCG00000010556	snv
	1	204804955	G	T	0.496	WZS01853-ZF3_153-sgRNACas9-KO-	control_CRISPR	somatic	intergenic_region	MODIFIER	ENSSSCG00000048022-ENSSSCG00000047033	ENSSSCG00000048022-ENSSSCG00000047033	snv
	11	59052078	C	A	0.588235	WZS01853-ZF3_153-sgRNACas9-KO-	control_CRISPR	somatic	intergenic_region	MODIFIER	ENSSSCG00000050699-ENSSSCG00000048437	ENSSSCG00000050699-ENSSSCG00000048437	snv
	6	167011065	C	G	0.171598	WZS01853-ZF3_153-sgRNACas9-KO-	control_CRISPR	somatic	intron_variant	MODIFIER	ERI3	ENSSSCG00000036909	snv
	13	53290171	G	C	0.595041	WZS01853-ZF3_153-sgRNACas9-KO-	control_CRISPR	somatic	intergenic_region	MODIFIER	PROK2-U6	ENSSSCG00000026200-ENSSSCG00000049855	snv
	11	59232720	GA	G	0.268041	WZS01853-ZF3_153-sgRNACas9-KO-	control_CRISPR	somatic	intergenic_region	MODIFIER	ENSSSCG00000047426-ENSSSCG00000044716	ENSSSCG00000047426-ENSSSCG00000044716	indel
	13	34165727	G	A	0.155405	WZS01853-ZF3_153-sgRNACas9-KO-	control_CRISPR	somatic	intergenic_region	MODIFIER	ENSSSCG00000023325-POC1A	ENSSSCG00000023325-ENSSSCG00000011426	snv
	1	11193271	G	T	0.508772	WZS01853-ZF3_153-sgRNACas9-KO-	control_CRISPR	somatic	intergenic_region	MODIFIER	ENSSSCG00000051255-ENSSSCG00000044169	ENSSSCG00000051255-ENSSSCG00000044169	snv
	9	24465492	T	C	0.236364	WZS01853-ZF3_153-sgRNACas9-KO-	control_CRISPR	somatic	intron_variant	MODIFIER	ENSSSCG00000045215	ENSSSCG00000045215	snv
	13	139395377	C	A	0.408333	WZS01853-ZF3_153-sgRNACas9-KO-	control_CRISPR	somatic	upstream_gene_variant	MODIFIER	STXBP5L	ENSSSCG00000039888	snv
	4	16693754	T	C	0.481707	WZS01853-ZF3_153-sgRNACas9-KO-	control_CRISPR	somatic	intergenic_region	MODIFIER	ENSSSCG00000050319-ENSSSCG00000042950	ENSSSCG00000050319-ENSSSCG00000042950	snv
	1	256983655	T	C	0.513699	WZS01853-ZF3_153-sgRNACas9-KO-	control_CRISPR	somatic	intron_variant	MODIFIER	ASTN2	ENSSSCG00000005502	snv
	8	8330444	G	A	0.542373	WZS01853-ZF3_153-sgRNACas9-KO-	control_CRISPR	somatic	intergenic_region	MODIFIER	ENSSSCG00000039778-ENSSSCG00000035927	ENSSSCG00000039778-ENSSSCG00000035927	snv
	13	157147266	A	G	0.51087	WZS01853-ZF3_153-sgRNACas9-KO-	control_CRISPR	somatic	intergenic_region	MODIFIER	U4-U6	ENSSSCG00000023694-ENSSSCG00000020010	snv
	1	186246428	G	T	0.569343	WZS01853-ZF3_153-sgRNACas9-KO-	control_CRISPR	somatic	intron_variant	MODIFIER	ENSSSCG00000051017	ENSSSCG00000051017	snv
	3	99353064	T	G	0.462687	WZS01853-ZF3_153-sgRNACas9-KO-	control_CRISPR	somatic	intergenic_region	MODIFIER	ENSSSCG00000042130-ENSSSCG00000048362	ENSSSCG00000042130-ENSSSCG00000048362	snv
	17	4074627	G	T	0.218487	WZS01853-ZF3_153-sgRNACas9-KO-	control_CRISPR	somatic	intergenic_region	MODIFIER	MSR1-U2	ENSSSCG00000006979-ENSSSCG00000044006	snv
	6	117722999	G	A	0.524194	WZS01853-ZF3_153-sgRNACas9-KO-	control_CRISPR	somatic	intron_variant	MODIFIER	NOL4	ENSSSCG00000003737	snv
	15	34872905	C	A	0.542484	WZS01853-ZF3_153-sgRNACas9-KO-	control_CRISPR	somatic	intron_variant	MODIFIER	CSMD1	ENSSSCG00000015748	snv
	15	38088116	A	T	0.142857	WZS01853-ZF3_153-sgRNACas9-KO-	control_CRISPR	somatic	intron_variant	MODIFIER	ENSSSCG00000036997	ENSSSCG00000036997	snv
	15	35673647	G	C	0.560748	WZS01853-ZF3_153-sgRNACas9-KO-	control_CRISPR	somatic	intergenic_region	MODIFIER	ENSSSCG00000047354-ENSSSCG00000046725	ENSSSCG00000047354-ENSSSCG00000046725	snv
	1	63039305	A	G	0.448819	WZS01853-ZF3_153-sgRNACas9-KO-	control_CRISPR	somatic	intergenic_region	MODIFIER	MANEA-ENSSSCG00000049406	ENSSSCG00000035648-ENSSSCG00000049406	snv
	1	47746081	A	C	0.525253	WZS01853-ZF3_153-sgRNACas9-KO-	control_CRISPR	somatic	intergenic_region	MODIFIER	U2-ENSSSCG00000050497	ENSSSCG00000043187-ENSSSCG00000050497	snv
	4	6141226	C	T	0.560748	WZS01853-ZF3_153-sgRNACas9-KO-	control_CRISPR	somatic	intron_variant	MODIFIER	ENSSSCG00000045100	ENSSSCG00000045100	snv
	10	5319835	T	C	0.448276	WZS01853-ZF3_153-sgRNACas9-KO-	control_CRISPR	somatic	intergenic_region	MODIFIER	U6-ENSSSCG00000049015	ENSSSCG00000036162-ENSSSCG00000049015	snv
	6	32947381	C	A	0.412121	WZS01853-ZF3_153-sgRNACas9-KO-	control_CRISPR	somatic	intergenic_region	MODIFIER	ENSSSCG00000042804-ENSSSCG00000042676	ENSSSCG00000042804-ENSSSCG00000042676	snv
	6	58790463	G	C	0.139344	WZS01853-ZF3_153-sgRNACas9-KO-	control_CRISPR	somatic	intergenic_region	MODIFIER	ENSSSCG00000046933-ENSSSCG00000003272	ENSSSCG00000046933-ENSSSCG00000003272	snv
	15	129393401	A	AT	0.394366	WZS01853-ZF3_153-sgRNACas9-KO-	control_CRISPR	somatic	intron_variant	MODIFIER	SPHKAP	ENSSSCG00000016256	indel
	10	30320456	T	G	0.521127	WZS01853-ZF3_153-sgRNACas9-KO-	control_CRISPR	somatic	intron_variant	MODIFIER	NTRK2	ENSSSCG00000010959	snv
	1	100392815	AT	A	0.432	WZS01853-ZF3_153-sgRNACas9-KO-	control_CRISPR	somatic	intron_variant	MODIFIER	MRO	ENSSSCG00000004521	indel
	8	109136288	T	A	0.5	WZS01853-ZF3_153-sgRNACas9-KO-	control_CRISPR	somatic	intron_variant	MODIFIER	CAMK2D	ENSSSCG00000009123	snv
	5	19207524	A	G	0.297297	WZS01853-ZF3_153-sgRNACas9-KO-	control_CRISPR	somatic	downstream_gene_variant	MODIFIER	HOXC10	ENSSSCG00000022728	snv
	15	65683782	C	A	0.252174	WZS01853-ZF3_153-sgRNACas9-KO-	control_CRISPR	somatic	downstream_gene_variant	MODIFIER	PKP4	ENSSSCG00000015878	snv
	8	889424	A	C	0.243902	WZS01853-ZF3_153-sgRNACas9-KO-	control_CRISPR	somatic	missense_variant	MODERATE	FGFR3	ENSSSCG00000030827	snv
	15	51223717	T	C	0.216667	WZS01853-ZF3_153-sgRNACas9-KO-	control_CRISPR	somatic	intergenic_region	MODIFIER	ENSSSCG00000044341-ENSSSCG00000042616	ENSSSCG00000044341-ENSSSCG00000042616	snv
	3	131405740	C	G	0.508065	WZS01853-ZF3_153-sgRNACas9-KO-	control_CRISPR	somatic	intron_variant	MODIFIER	EIPR1	ENSSSCG00000028755	snv
	11	39800482	C	A	0.482143	WZS01853-ZF3_153-sgRNACas9-KO-	control_CRISPR	somatic	upstream_gene_variant	MODIFIER	ENSSSCG00000048586	ENSSSCG00000048586	snv
	7	38245911	C	T	0.25	WZS01853-ZF3_153-sgRNACas9-KO-	control_CRISPR	somatic	synonymous_variant	LOW	CUL9	ENSSSCG00000030196	snv
	17	25223756	C	A	0.26506	WZS01853-ZF3_153-sgRNACas9-KO-	control_CRISPR	somatic	intergenic_region	MODIFIER	ENSSSCG00000007080-ENSSSCG00000048938	ENSSSCG00000007080-ENSSSCG00000048938	snv
	9	139308429	G	C	0.616	WZS01853-ZF3_153-sgRNACas9-KO-	control_CRISPR	somatic	intron_variant	MODIFIER	EGFR	ENSSSCG00000022126	snv
	7	45145858	A	T	0.428571	WZS01853-ZF3_153-sgRNACas9-KO-	control_CRISPR	somatic	intron_variant	MODIFIER	ENSSSCG00000035274	ENSSSCG00000035274	snv
	15	51687201	C	A	0.37037	WZS01853-ZF3_153-sgRNACas9-KO-	control_CRISPR	somatic	intergenic_region	MODIFIER	ENSSSCG00000049652-ENSSSCG00000036767	ENSSSCG00000049652-ENSSSCG00000036767	snv
	16	61583378	A	C	0.485437	WZS01853-ZF3_153-sgRNACas9-KO-	control_CRISPR	somatic	intergenic_region	MODIFIER	GABRG2-GABRA1	ENSSSCG00000017025-ENSSSCG00000023661	snv
	1	45773698	A	G	0.487395	WZS01853-ZF3_153-sgRNACas9-KO-	control_CRISPR	somatic	intergenic_region	MODIFIER	PHF3-ENSSSCG00000049526	ENSSSCG00000035259-ENSSSCG00000049526	snv
	13	5349453	A	T	0.451977	WZS01853-ZF3_153-sgRNACas9-KO-	control_CRISPR	somatic	intron_variant	MODIFIER	SATB1	ENSSSCG00000011201	snv
	14	33002532	G	T	0.44186	WZS01853-ZF3_153-sgRNACas9-KO-	control_CRISPR	somatic	intergenic_region	MODIFIER	ENSSSCG00000043387-CIT	ENSSSCG00000043387-ENSSSCG00000009839	snv
	17	14890233	T	G	0.5	WZS01853-ZF3_153-sgRNACas9-KO-	control_CRISPR	somatic	intron_variant	MODIFIER	TRMT6	ENSSSCG00000007046	snv
	2	960321	G	C	0.328358	WZS01853-ZF3_153-sgRNACas9-KO-	control_CRISPR	somatic	synonymous_variant	LOW	MOB2	ENSSSCG00000037847	snv
	15	109659932	G	T	0.578947	WZS01853-ZF3_153-sgRNACas9-KO-	control_CRISPR	somatic	upstream_gene_variant	MODIFIER	ENSSSCG00000044852	ENSSSCG00000044852	snv
	8	119462792	C	CT	0.568627	WZS01853-ZF3_153-sgRNACas9-KO-	control_CRISPR	somatic	intron_variant	MODIFIER	PPP3CA	ENSSSCG00000009172	indel
	11	20246405	C	CT	0.435185	WZS01853-ZF3_153-sgRNACas9-KO-	control_CRISPR	somatic	intergenic_region	MODIFIER	ENSSSCG00000045306-ENSSSCG00000047405	ENSSSCG00000045306-ENSSSCG00000047405	indel
	6	89000130	C	G	0.248521	WZS01853-ZF3_153-sgRNACas9-KO-	control_CRISPR	somatic	synonymous_variant	LOW	ENSSSCG00000028423	ENSSSCG00000028423	snv
	14	119380070	T	C	0.525	WZS01853-ZF3_153-sgRNACas9-KO-	control_CRISPR	somatic	intergenic_region	MODIFIER	ENSSSCG00000046631-ENSSSCG00000050431	ENSSSCG00000046631-ENSSSCG00000050431	snv
	13	200670665	G	C	0.44898	WZS01853-ZF3_153-sgRNACas9-KO-	control_CRISPR	somatic	intron_variant	MODIFIER	ENSSSCG00000012061	ENSSSCG00000012061	snv
	1	73738628	T	C	0.462069	WZS01853-ZF3_153-sgRNACas9-KO-	control_CRISPR	somatic	upstream_gene_variant	MODIFIER	ENSSSCG00000050189	ENSSSCG00000050189	snv
	7	71056118	C	A	0.489796	WZS01853-ZF3_153-sgRNACas9-KO-	control_CRISPR	somatic	intron_variant	MODIFIER	ENSSSCG00000041019	ENSSSCG00000041019	snv
	1	206386847	G	C	0.67619	WZS01853-ZF3_153-sgRNACas9-KO-	control_CRISPR	somatic	intergenic_region	MODIFIER	BNC2-ENSSSCG00000044282	ENSSSCG00000005180-ENSSSCG00000044282	snv
	1	1911292	A	G	0.55814	WZS01853-ZF3_153-sgRNACas9-KO-	control_CRISPR	somatic	intergenic_region	MODIFIER	ENSSSCG00000051690-UNC93A	ENSSSCG00000051690-ENSSSCG00000027404	snv
	2	112196867	G	A	0.574257	WZS01853-ZF3_153-sgRNACas9-KO-	control_CRISPR	somatic	intergenic_region	MODIFIER	ENSSSCG00000043847-ENSSSCG00000044646	ENSSSCG00000043847-ENSSSCG00000044646	snv
	1	46478028	G	A	0.447917	WZS01853-ZF3_153-sgRNACas9-KO-	control_CRISPR	somatic	intergenic_region	MODIFIER	ENSSSCG00000049526-ENSSSCG00000004269	ENSSSCG00000049526-ENSSSCG00000004269	snv
	3	115634355	T	G	0.527397	WZS01853-ZF3_153-sgRNACas9-KO-	control_CRISPR	somatic	downstream_gene_variant	MODIFIER	ENSSSCG00000047802	ENSSSCG00000047802	snv
	2	112267007	T	C	0.448819	WZS01853-ZF3_153-sgRNACas9-KO-	control_CRISPR	somatic	intergenic_region	MODIFIER	ENSSSCG00000043847-ENSSSCG00000044646	ENSSSCG00000043847-ENSSSCG00000044646	snv
	3	90640552	A	G	0.424242	WZS01853-ZF3_153-sgRNACas9-KO-	control_CRISPR	somatic	intron_variant	MODIFIER	NRXN1	ENSSSCG00000026180	snv
	5	39093174	C	T	0.492958	WZS01853-ZF3_153-sgRNACas9-KO-	control_CRISPR	somatic	intergenic_region	MODIFIER	U6-ENSSSCG00000043676	ENSSSCG00000049116-ENSSSCG00000043676	snv
	11	57277628	C	A	0.32	WZS01853-ZF3_153-sgRNACas9-KO-	control_CRISPR	somatic	intergenic_region	MODIFIER	SLITRK6-ENSSSCG00000033995	ENSSSCG00000009486-ENSSSCG00000033995	snv
	7	31806073	T	C	0.255814	WZS01853-ZF3_153-sgRNACas9-KO-	control_CRISPR	somatic	intron_variant	MODIFIER	MAPK14	ENSSSCG00000001556	snv
	13	154934097	A	T	0.51938	WZS01853-ZF3_153-sgRNACas9-KO-	control_CRISPR	somatic	intergenic_region	MODIFIER	ENSSSCG00000035590-ENSSSCG00000043607	ENSSSCG00000035590-ENSSSCG00000043607	snv
	2	143015756	G	A	0.232877	WZS01853-ZF3_153-sgRNACas9-KO-	control_CRISPR	somatic	synonymous_variant	LOW	PCDHGA6	ENSSSCG00000046808	snv
	16	2128205	G	T	0.435484	WZS01853-ZF3_153-sgRNACas9-KO-	control_CRISPR	somatic	intergenic_region	MODIFIER	ENSSSCG00000050328-ENSSSCG00000046966	ENSSSCG00000050328-ENSSSCG00000046966	snv
	6	79411290	CG	C	0.525773	WZS01853-ZF3_153-sgRNACas9-KO-	control_CRISPR	somatic	intron_variant	MODIFIER	ECE1	ENSSSCG00000003513	indel
	3	118652484	A	T	0.527027	WZS01853-ZF3_153-sgRNACas9-KO-	control_CRISPR	somatic	intron_variant	MODIFIER	OSR1	ENSSSCG00000008606	snv
	5	102673204	C	T	0.478261	WZS01853-ZF3_153-sgRNACas9-KO-	control_CRISPR	somatic	upstream_gene_variant	MODIFIER	ENSSSCG00000051497	ENSSSCG00000051497	snv
	9	54858687	T	C	0.528926	WZS01853-ZF3_153-sgRNACas9-KO-	control_CRISPR	somatic	intergenic_region	MODIFIER	ENSSSCG00000044962-ENSSSCG00000044173	ENSSSCG00000044962-ENSSSCG00000044173	snv
	6	111474742	A	G	0.447154	WZS01853-ZF3_153-sgRNACas9-KO-	control_CRISPR	somatic	intron_variant	MODIFIER	CHST9	ENSSSCG00000003721	snv
	15	114030169	A	C	0.524138	WZS01853-ZF3_153-sgRNACas9-KO-	control_CRISPR	somatic	intron_variant	MODIFIER	ERBB4	ENSSSCG00000016160	snv
	5	72815198	CT	C	0.505051	WZS01853-ZF3_153-sgRNACas9-KO-	control_CRISPR	somatic	intron_variant	MODIFIER	PDZRN4	ENSSSCG00000000791	indel
	4	28852277	G	T	0.50303	WZS01853-ZF3_153-sgRNACas9-KO-	control_CRISPR	somatic	intron_variant	MODIFIER	EMC2	ENSSSCG00000006032	snv
	9	35864119	C	A	0.357664	WZS01853-ZF3_153-sgRNACas9-KO-	control_CRISPR	somatic	intron_variant	MODIFIER	MSANTD4	ENSSSCG00000026833	snv
	10	61642432	G	T	0.393443	WZS01853-ZF3_153-sgRNACas9-KO-	control_CRISPR	somatic	intergenic_region	MODIFIER	ENSSSCG00000050690-ENSSSCG00000044053	ENSSSCG00000050690-ENSSSCG00000044053	snv
	12	57578814	C	T	0.455882	WZS01853-ZF3_153-sgRNACas9-KO-	control_CRISPR	somatic	intron_variant	MODIFIER	ENSSSCG00000048897	ENSSSCG00000048897	snv
	11	42594244	G	T	0.514563	WZS14EFO_214-Cas9High	control_CRISPR	somatic	intergenic_region	MODIFIER	KLHL1-ENSSSCG00000046505	ENSSSCG00000009456-ENSSSCG00000046505	snv
	13	114568705	C	A	0.473118	WZS14EFO_214-Cas9High	control_CRISPR	somatic	intergenic_region	MODIFIER	NAALADL2-ENSSSCG00000043568	ENSSSCG00000023871-ENSSSCG00000043568	snv
	2	122508910	C	A	0.441441	WZS14EFO_214-Cas9High	control_CRISPR	somatic	upstream_gene_variant	MODIFIER	ENSSSCG00000042506	ENSSSCG00000042506	snv
	5	61157670	A	G	0.31746	WZS14EFO_214-Cas9High	control_CRISPR	somatic	upstream_gene_variant	MODIFIER	ENSSSCG00000037609	ENSSSCG00000037609	snv
	8	55834363	C	A	0.5	WZS14EFO_214-Cas9High	control_CRISPR	somatic	downstream_gene_variant	MODIFIER	THEGL	ENSSSCG00000032353	snv
	15	119929978	A	T	0.425743	WZS14EFO_214-Cas9High	control_CRISPR	somatic	intergenic_region	MODIFIER	ENSSSCG00000045844-TNS1	ENSSSCG00000045844-ENSSSCG00000027669	snv
	11	76598033	A	G	0.527473	WZS14EFO_214-Cas9High	control_CRISPR	somatic	intergenic_region	MODIFIER	ENSSSCG00000046386-IRS2	ENSSSCG00000046386-ENSSSCG00000034763	snv
	1	200432392	G	T	0.376623	WZS14EFO_214-Cas9High	control_CRISPR	somatic	intergenic_region	MODIFIER	DMRTA1-ENSSSCG00000050165	ENSSSCG00000005131-ENSSSCG00000050165	snv
	9	88330694	C	A	0.531532	WZS14EFO_214-Cas9High	control_CRISPR	somatic	intergenic_region	MODIFIER	FERD3L-ENSSSCG00000044171	ENSSSCG00000015371-ENSSSCG00000044171	snv
	3	40203534	G	A	0.428571	WZS14EFO_214-Cas9High	control_CRISPR	somatic	synonymous_variant	LOW	MAPK8IP3	ENSSSCG00000008018	snv
	16	10697132	T	C	0.387387	WZS14EFO_214-Cas9High	control_CRISPR	somatic	intergenic_region	MODIFIER	ENSSSCG00000044561-ENSSSCG00000042836	ENSSSCG00000044561-ENSSSCG00000042836	snv
	16	61625666	TA	T	0.517647	WZS14EFO_214-Cas9High	control_CRISPR	somatic	intergenic_region	MODIFIER	GABRG2-GABRA1	ENSSSCG00000017025-ENSSSCG00000023661	indel
	8	66467129	C	A	0.53271	WZS14EFO_214-Cas9High	control_CRISPR	somatic	intron_variant	MODIFIER	ENSSSCG00000022724	ENSSSCG00000022724	snv
	4	78227746	C	A	0.441558	WZS14EFO_214-Cas9High	control_CRISPR	somatic	intergenic_region	MODIFIER	PCMTD1-ENSSSCG00000051470	ENSSSCG00000006267-ENSSSCG00000051470	snv
	15	10828323	T	G	0.27907	WZS14EFO_214-Cas9High	control_CRISPR	somatic	intron_variant	MODIFIER	LRP1B	ENSSSCG00000023746	snv
	9	17922254	T	C	0.536585	WZS14EFO_214-Cas9High	control_CRISPR	somatic	intron_variant	MODIFIER	DLG2	ENSSSCG00000014904	snv
	8	48360070	G	A	0.439394	WZS14EFO_214-Cas9High	control_CRISPR	somatic	intergenic_region	MODIFIER	ENSSSCG00000042238-U6	ENSSSCG00000042238-ENSSSCG00000020037	snv
	8	81918827	T	G	0.476744	WZS14EFO_214-Cas9High	control_CRISPR	somatic	intron_variant	MODIFIER	TTC29	ENSSSCG00000040272	snv
	15	3687345	G	T	0.556522	WZS14EFO_214-Cas9High	control_CRISPR	somatic	downstream_gene_variant	MODIFIER	MBD5	ENSSSCG00000015667	snv
	16	67926699	G	GA	0.488889	WZS14EFO_214-Cas9High	control_CRISPR	somatic	intergenic_region	MODIFIER	ENSSSCG00000047969-ENSSSCG00000049201	ENSSSCG00000047969-ENSSSCG00000049201	indel
	2	17669919	T	C	0.526316	WZS14EFO_214-Cas9High	control_CRISPR	somatic	intron_variant	MODIFIER	TSPAN18	ENSSSCG00000013278	snv
	8	46262648	C	A	0.344444	WZS14EFO_214-Cas9High	control_CRISPR	somatic	intergenic_region	MODIFIER	GRIA2-ENSSSCG00000042685	ENSSSCG00000024685-ENSSSCG00000042685	snv
	8	33825211	A	G	0.405063	WZS14EFO_214-Cas9High	control_CRISPR	somatic	intergenic_region	MODIFIER	ENSSSCG00000048055-GRXCR1	ENSSSCG00000048055-ENSSSCG00000008804	snv
	10	35519727	T	C	0.483516	WZS14EFO_214-Cas9High	control_CRISPR	somatic	intron_variant	MODIFIER	ENSSSCG00000032000	ENSSSCG00000032000	snv
	10	21415740	G	T	0.442857	WZS14EFO_214-Cas9High	control_CRISPR	somatic	upstream_gene_variant	MODIFIER	ENSSSCG00000049222	ENSSSCG00000049222	snv
	10	3378371	C	T	0.633803	WZS14EFO_214-Cas9High	control_CRISPR	somatic	intergenic_region	MODIFIER	BRINP3-ENSSSCG00000035395	ENSSSCG00000010809-ENSSSCG00000035395	snv
	1	177921560	T	C	0.534653	WZS14EFO_214-Cas9High	control_CRISPR	somatic	intergenic_region	MODIFIER	ENSSSCG00000044998-ENSSSCG00000041258	ENSSSCG00000044998-ENSSSCG00000041258	snv
	2	11421957	T	C	0.521277	WZS14EFO_214-Cas9High	control_CRISPR	somatic	upstream_gene_variant	MODIFIER	MS4A2	ENSSSCG00000034506	snv
	9	118840577	G	T	0.244186	WZS14EFO_214-Cas9High	control_CRISPR	somatic	intron_variant	MODIFIER	ASTN1	ENSSSCG00000015513	snv
	13	106649413	T	C	0.529412	WZS14EFO_214-Cas9High	control_CRISPR	somatic	intron_variant	MODIFIER	SERPINI1	ENSSSCG00000011740	snv
	5	4358508	C	A	0.468085	WZS14EFO_214-Cas9High	control_CRISPR	somatic	missense_variant	MODERATE	PHF21B	ENSSSCG00000000020	snv
	18	21318426	C	A	0.47619	WZS14EFO_214-Cas9High	control_CRISPR	somatic	intron_variant	MODIFIER	GRM8	ENSSSCG00000022865	snv
	4	29189129	C	A	0.57732	WZS14EFO_214-Cas9High	control_CRISPR	somatic	intergenic_region	MODIFIER	EMC2-EIF3E	ENSSSCG00000006032-ENSSSCG00000006033	snv
	1	246764721	C	G	0.490909	WZS14EFO_214-Cas9High	control_CRISPR	somatic	upstream_gene_variant	MODIFIER	ENSSSCG00000051119	ENSSSCG00000051119	snv
	1	197387408	CT	C	0.575472	WZS14EFO_214-Cas9High	control_CRISPR	somatic	intergenic_region	MODIFIER	TUSC1-IZUMO3	ENSSSCG00000005128-ENSSSCG00000005129	indel
	11	60363321	A	G	0.574713	WZS14EFO_214-Cas9High	control_CRISPR	somatic	intergenic_region	MODIFIER	ENSSSCG00000043274-ENSSSCG00000038699	ENSSSCG00000043274-ENSSSCG00000038699	snv
	8	50716764	G	A	0.578431	WZS14EFO_214-Cas9High	control_CRISPR	somatic	intron_variant	MODIFIER	FSTL5	ENSSSCG00000027183	snv
	1	59937832	A	G	0.527473	WZS14EFO_214-Cas9High	control_CRISPR	somatic	intergenic_region	MODIFIER	ENSSSCG00000048181-U2	ENSSSCG00000048181-ENSSSCG00000042748	snv
	11	53105847	G	T	0.589474	WZS14EFO_214-Cas9High	control_CRISPR	somatic	intron_variant	MODIFIER	ENSSSCG00000045873	ENSSSCG00000045873	snv
	6	112317614	G	T	0.514851	WZS14EFO_214-Cas9High	control_CRISPR	somatic	intergenic_region	MODIFIER	ENSSSCG00000042906-CDH2	ENSSSCG00000042906-ENSSSCG00000003722	snv
	4	96642806	C	T	0.477064	WZS14EFO_214-Cas9High	control_CRISPR	somatic	intergenic_region	MODIFIER	ENSSSCG00000049179-IVL	ENSSSCG00000049179-ENSSSCG00000006595	snv
	4	101365321	C	A	0.54717	WZS14EFO_214-Cas9High	control_CRISPR	somatic	intergenic_region	MODIFIER	REG4-HMGCS2	ENSSSCG00000040947-ENSSSCG00000036808	snv
	8	59008434	A	G	0.438095	WZS14EFO_214-Cas9High	control_CRISPR	somatic	intergenic_region	MODIFIER	ENSSSCG00000049794-ENSSSCG00000046730	ENSSSCG00000049794-ENSSSCG00000046730	snv
	13	203228693	G	A	0.477778	WZS14EFO_214-Cas9High	control_CRISPR	somatic	intergenic_region	MODIFIER	ENSSSCG00000050754-ENSSSCG00000038056	ENSSSCG00000050754-ENSSSCG00000038056	snv
	14	141667992	A	G	0.504762	WZS14EFO_214-Cas9High	control_CRISPR	somatic	intergenic_region	MODIFIER	ENSSSCG00000049424-ENSSSCG00000010782	ENSSSCG00000049424-ENSSSCG00000010782	snv
	2	627889	G	A	0.382022	WZS14EFO_214-Cas9High	control_CRISPR	somatic	3_prime_UTR_variant	MODIFIER	AP2A2	ENSSSCG00000012836	snv
	1	210923905	T	A	0.5	WZS14EFO_214-Cas9High	control_CRISPR	somatic	intergenic_region	MODIFIER	ENSSSCG00000048974-ENSSSCG00000047464	ENSSSCG00000048974-ENSSSCG00000047464	snv
	14	29972264	CG	C	0.60241	WZS14EFO_214-Cas9High	control_CRISPR	somatic	intron_variant	MODIFIER	VPS37B	ENSSSCG00000028889	indel
	3	120486099	C	T	0.602941	WZS14EFO_214-Cas9High	control_CRISPR	somatic	intergenic_region	MODIFIER	RAD51AP2-U6	ENSSSCG00000038058-ENSSSCG00000023910	snv
	1	78661091	TG	T	0.55814	WZS14EFO_214-Cas9High	control_CRISPR	somatic	intergenic_region	MODIFIER	ENSSSCG00000048426-ENSSSCG00000049926	ENSSSCG00000048426-ENSSSCG00000049926	indel
	1	158297211	A	G	0.6	WZS14EFO_214-Cas9High	control_CRISPR	somatic	intron_variant	MODIFIER	KDSR	ENSSSCG00000025744	snv
	8	105825425	A	G	0.220183	WZS14EFO_214-Cas9High	control_CRISPR	somatic	intergenic_region	MODIFIER	ENSSSCG00000048550-ENSSSCG00000043526	ENSSSCG00000048550-ENSSSCG00000043526	snv
	6	125386813	C	A	0.37931	WZS14EFO_214-Cas9High	control_CRISPR	somatic	downstream_gene_variant	MODIFIER	ENSSSCG00000042262	ENSSSCG00000042262	snv
	1	212301351	A	T	0.571429	WZS14EFO_214-Cas9High	control_CRISPR	somatic	intergenic_region	MODIFIER	ENSSSCG00000048126-ENSSSCG00000043945	ENSSSCG00000048126-ENSSSCG00000043945	snv
	1	213353483	C	G	0.54878	WZS14EFO_214-Cas9High	control_CRISPR	somatic	intergenic_region	MODIFIER	ENSSSCG00000042224-U6	ENSSSCG00000042224-ENSSSCG00000031185	snv
	15	33699847	C	A	0.448276	WZS14EFO_214-Cas9High	control_CRISPR	somatic	intergenic_region	MODIFIER	ENSSSCG00000015747-ENSSSCG00000048555	ENSSSCG00000015747-ENSSSCG00000048555	snv
	6	69666203	A	T	0.5	WZS14EFO_214-Cas9High	control_CRISPR	somatic	upstream_gene_variant	MODIFIER	H6PD	ENSSSCG00000034502	snv
	13	27278689	G	C	0.432836	WZS14EFO_214-Cas9High	control_CRISPR	somatic	intergenic_region	MODIFIER	ENSSSCG00000050558-ENSSSCG00000045193	ENSSSCG00000050558-ENSSSCG00000045193	snv
	16	955043	C	A	0.447368	WZS14EFO_214-Cas9High	control_CRISPR	somatic	intron_variant	MODIFIER	CTNND2	ENSSSCG00000016780	snv
	1	132703992	GT	G	0.482759	WZS14EFO_214-Cas9High	control_CRISPR	somatic	intron_variant	MODIFIER	RASGRP1	ENSSSCG00000004791	indel
	2	112336746	T	C	0.386139	WZS14EFO_214-Cas9High	control_CRISPR	somatic	intergenic_region	MODIFIER	ENSSSCG00000043847-ENSSSCG00000044646	ENSSSCG00000043847-ENSSSCG00000044646	snv
	8	28384347	G	T	0.493506	WZS14EFO_214-Cas9High	control_CRISPR	somatic	intron_variant	MODIFIER	ENSSSCG00000035159	ENSSSCG00000035159	snv
	11	62611805	C	A	0.451613	WZS14EFO_214-Cas9High	control_CRISPR	somatic	intron_variant	MODIFIER	GPC6	ENSSSCG00000009489	snv
	3	13243038	GC	G	0.596774	WZS14EFO_214-Cas9High	control_CRISPR	somatic	intergenic_region	MODIFIER	ENSSSCG00000047001-U6	ENSSSCG00000047001-ENSSSCG00000019149	indel
	3	22636703	TC	T	0.313433	WZS14EFO_214-Cas9High	control_CRISPR	somatic	downstream_gene_variant	MODIFIER	NDUFAB1	ENSSSCG00000010795	indel
	2	93890688	A	C	0.558824	WZS14EFO_214-Cas9High	control_CRISPR	somatic	intergenic_region	MODIFIER	EDIL3-COX7C	ENSSSCG00000026780-ENSSSCG00000040325	snv
	2	40867025	T	A	0.558824	WZS14EFO_214-Cas9High	control_CRISPR	somatic	intron_variant	MODIFIER	GTF2H1	ENSSSCG00000013367	snv
	8	136734376	G	A	0.384615	WZS14EFO_214-Cas9High	control_CRISPR	somatic	intron_variant	MODIFIER	ENSSSCG00000041523	ENSSSCG00000041523	snv
	16	10697155	T	C	0.366337	WZS14EFO_214-Cas9High	control_CRISPR	somatic	intergenic_region	MODIFIER	ENSSSCG00000044561-ENSSSCG00000042836	ENSSSCG00000044561-ENSSSCG00000042836	snv
	13	131543343	G	A	0.45122	WZS14EFO_214-Cas9High	control_CRISPR	somatic	intergenic_region	MODIFIER	ATP13A3-TMEM44	ENSSSCG00000011825-ENSSSCG00000011826	snv
	6	25323635	T	C	0.526786	WZS14EFO_214-Cas9High	control_CRISPR	somatic	intergenic_region	MODIFIER	ENSSSCG00000041451-ENSSSCG00000050027	ENSSSCG00000041451-ENSSSCG00000050027	snv
	6	67339476	C	T	0.423077	WZS14EFO_214-Cas9High	control_CRISPR	somatic	intron_variant	MODIFIER	PLEKHG5	ENSSSCG00000003376	snv
	6	55286964	C	T	0.522222	WZS14EFO_214-Cas9High	control_CRISPR	somatic	intron_variant	MODIFIER	MYBPC2	ENSSSCG00000003218	snv
	9	31156909	G	A	0.289256	WZS14EFO_214-Cas9High	control_CRISPR	somatic	intron_variant	MODIFIER	CNTN5	ENSSSCG00000014975	snv
	5	37225635	A	G	0.43038	WZS14EFO_214-Cas9High	control_CRISPR	somatic	intergenic_region	MODIFIER	ENSSSCG00000044906-KCNC2	ENSSSCG00000044906-ENSSSCG00000000516	snv
	7	21788277	G	A	0.566667	WZS14EFO_214-Cas9High	control_CRISPR	somatic	intron_variant	MODIFIER	ENSSSCG00000046222	ENSSSCG00000046222	snv
	3	30393264	C	G	0.465909	WZS14EFO_214-Cas9High	control_CRISPR	somatic	intron_variant	MODIFIER	CPPED1	ENSSSCG00000024206	snv
	6	104974198	TA	T	0.569231	WZS14EFO_214-Cas9High	control_CRISPR	somatic	intron_variant	MODIFIER	ENSSSCG00000044928	ENSSSCG00000044928	indel
	8	32856767	C	T	0.460177	WZS14EFO_214-Cas9High	control_CRISPR	somatic	intergenic_region	MODIFIER	PHOX2B-ENSSSCG00000019028	ENSSSCG00000038488-ENSSSCG00000019028	snv
	1	48857042	C	T	0.4	WZS14EFO_214-Cas9High	control_CRISPR	somatic	intron_variant	MODIFIER	ENSSSCG00000047735	ENSSSCG00000047735	snv
	17	28696364	G	T	0.542169	WZS14EFO_214-Cas9High	control_CRISPR	somatic	intergenic_region	MODIFIER	RALGAPA2-U6	ENSSSCG00000026506-ENSSSCG00000037604	snv
	1	259624508	G	T	0.481132	WZS14EFO_214-Cas9High	control_CRISPR	somatic	intron_variant	MODIFIER	ENSSSCG00000046664	ENSSSCG00000046664	snv
	15	10820956	A	G	0.462366	WZS14EFO_214-Cas9High	control_CRISPR	somatic	intron_variant	MODIFIER	LRP1B	ENSSSCG00000023746	snv
	1	11514279	CTCT	C	0.413793	WZS14EFO_214-Cas9High	control_CRISPR	somatic	intergenic_region	MODIFIER	NOX3-TFB1M	ENSSSCG00000004068-ENSSSCG00000024361	indel
	6	126600395	G	T	0.535714	WZS14EFO_214-Cas9High	control_CRISPR	somatic	intergenic_region	MODIFIER	ENSSSCG00000037233-SYT4	ENSSSCG00000037233-ENSSSCG00000037079	snv
	18	36080377	T	C	0.384615	WZS14EFO_214-Cas9High	control_CRISPR	somatic	downstream_gene_variant	MODIFIER	ENSSSCG00000048016	ENSSSCG00000048016	snv
	5	97829762	C	A	0.491525	WZS14EFO_214-Cas9High	control_CRISPR	somatic	intergenic_region	MODIFIER	ENSSSCG00000051328-ENSSSCG00000049763	ENSSSCG00000051328-ENSSSCG00000049763	snv
	6	76504987	G	C	0.193548	WZS14EFO_214-Cas9High	control_CRISPR	somatic	intergenic_region	MODIFIER	ACTL8-ENSSSCG00000043698	ENSSSCG00000024062-ENSSSCG00000043698	snv
	6	76649395	G	A	0.271429	WZS14EFO_214-Cas9High	control_CRISPR	somatic	upstream_gene_variant	MODIFIER	ENSSSCG00000051351	ENSSSCG00000051351	snv
	15	26396058	G	A	0.426471	WZS14EFO_214-Cas9High	control_CRISPR	somatic	intergenic_region	MODIFIER	ENSSSCG00000026916-ENSSSCG00000042495	ENSSSCG00000026916-ENSSSCG00000042495	snv
	2	54193981	A	T	0.239437	WZS14EFO_214-Cas9High	control_CRISPR	somatic	upstream_gene_variant	MODIFIER	ENSSSCG00000044135	ENSSSCG00000044135	snv
[truncated: 5,379 more rows]
