# Supplementary material for: Genome-wide genetic mutations accumulated in genome-edited pigs and their filial generation for xenotransplantation
Source: Research Square preprint supplement (doi:10.21203/rs.3.rs-3139100/v1), 2023-07-18
Supplement: Supplementary file 4 [file d7dd69256c833b4cb3c52d14.xlsx]

## Sheet: Supplementary Table 1
	Supplementary Table 1 | Primers for genotyping for on-target.
	GGTA1 sgRNA	Primer	Sequence (5’ to 3’)
	GAGAAAATAATGAATGTCAAAGG	F1	CGTTGCTGTCCGTGAGTTGT
		R1	TCTTTACGGTGTCAGTGAATCCTAC
		F2	TAAACCCGTCACTCTCCCAC
		R2	ACGGTGTCAGTGAATCCTAC

## Sheet: Supplementary Table 2
	Supplementary Table 2 | Targeting efficiency of the gRNA in Wuzhishan minipig fibroblasts.
	GGTA1 sgRNA	Line of cell	Positive clone number	Total clone number	Efficiency
	GAGAAAATAATGAATGTCAAAGG	153 pig fibroblasts	7	7	1
		214 pig fibroblasts	19	20	0.95
	Targeting efficiency was calculated as the percentage of positive cell clones in total cell clones picked.

## Sheet: Supplementary Table 3
	Supplementary Table 3 | Statistics of blood physiology and blood chemistry.
		GTKO pigs																		Wild type pigs
		2811	2814	2815	2894	2895	2897	2875	2813	2816	2893	2896	2876	2877	2878	2879	Mean	SD	N	2831	2833	2837	2830	2828	2829	1854	3285	3286	3287	153	214	Mean	SD	N	p	Mean of GTKO	Mean of WT	Difference	SE of difference	t ratio	df	q value
	White blood cell count (WBC, 10^9/L )	29.53	21.25	30.63	27.47	18.93	19.36	18.7	19.51	21.48	25.26	23.57	25.57	19.16	20.62	21.86	22.86	3.96547	15	37.01	19.18	33.5	21.87	22.05	22.31	18.13				9.67	17	22.3022	8.34267	9	0.825896	22.86	22.3	0.5578	2.506	0.2226	22	0.938196
	Red blood cell count (RBC, 10^12/L )	7.92	8.77	8.41	7.63	8.09	8.09	8.27	9.23	10.04	8.63	8.62	9.05	8.08	9.38	9.11	8.62133	0.649383	15	8.21	10.24	8.56	9.47	11.23	9.43	7.1				6.24	7.23	8.63444	1.61601	9	0.977776	8.621	8.634	-0.01311	0.4653	0.02818	22	>0.999999
	Hemoglobin (HGB, g/L )	147	149	154	137	139	147	140	153	160	151	148	150	136	162	158	148.733	8.10173	15	132	173	147	152	174	161	141				128	150	150.889	16.2822	9	0.667858	148.7	150.9	-2.156	4.956	0.4349	22	0.894541
	Red blood cell specific volume (HCT, % )	47	48.5	50.2	43.7	44.3	45.9	45.6	48.3	51	46.2	46.3	46.6	44.9	51.7	49.3	47.3	2.43868	15	40.2	52.8	47.5	47.3	55.2	53.8	42.7				38.2	43.9	46.8444	6.11374	9	0.797897	47.3	46.84	0.4556	1.758	0.2592	22	0.938196
	Mean red cell volume (MCV, fL )	59.4	55.3	59.7	57.3	54.8	56.7	55.2	52.3	50.8	53.6	53.7	51.4	55.6	55.2	54.1	55.0067	2.57112	15	49	51.6	55.5	49.9	49.1	57.1	60.1				61.3	60.7	54.9222	5.1378	9	0.9575	55.01	54.92	0.08444	1.567	0.0539	22	>0.999999
	Mean corpuscular hemoglobin (MCH, pg )	18.5	17	18.2	17.9	17.2	18.2	16.9	16.5	15.9	17.5	17.2	16.6	16.9	17.3	17.4	17.28	0.706298	15	16.1	16.9	17.2	16.1	15.5	17	19.8				20.5	20.8	17.7667	2.03593	9	0.402057	17.28	17.77	-0.4867	0.5696	0.8545	22	0.839227
	Mean corpuscular hemoglobin concentration (MCHC, g/L )	312	307	306	312	314	321	306	316	313	326	321	323	304	314	321	314.4	6.86398	15	329	327	309	322	315	298	329				334	342	322.778	13.4887	9	0.055014	314.4	322.8	-8.378	4.134	2.026	22	0.390477
	Lymphocyte% (Lym%, % )		61.2	47.3	69.3	49.4	67			63.6	57.7		42.3	53.6			56.8222	9.30185	9			39.2	56.8		74.2							56.7333	17.5001	3	0.990916	56.82	56.73	0.08889	7.615	0.01167	10	>0.999999
	Monocytes% (Mon%, % )		35.4	47.6	24.8	43.3	25.6			29.7	37.8		53.3	38.2			37.3	9.70605	9			11.7	39.8		21.3							24.2667	14.283	3	0.09977	37.3	24.27	13.03	7.185	1.814	10	0.390477
	Neutrophil% (Neu%, % )		0.2	0.3	0.5	1.4	0.2			0.7	0.5		0.5	0.5			0.533333	0.364005	9			41.9	0.2		0.1							14.0667	24.1044	3	0.089187	0.5333	14.07	-13.53	7.19	1.882	10	0.390477
	Eosinophilic granulocyte% (Eos%, % )		2.8	4.2	5.2	5.5	6.6			5.4	3.7		3.7	7.3			4.93333	1.46287	9			6.9	2.6		4							4.5	2.19317	3	0.699354	4.933	4.5	0.4333	1.09	0.3975	10	0.894541
	Basophilic granulocyte% (Bas%, % )		0.4	0.6	0.2	0.4	0.6			0.6	0.3		0.2	0.4			0.411111	0.161589	9			0.3	0.6		0.4							0.433333	0.152753	3	0.839013	0.4111	0.4333	-0.02222	0.1066	0.2085	10	0.938196
	Lymphocyte# (Lym#, 10^9/L )		13.01	14.49	19.04	9.36	12.98			13.67	14.58		10.82	10.27			13.1356	2.8926	9			13.14	12.43		16.56							14.0433	2.20822	3	0.633543	13.14	14.04	-0.9078	1.846	0.4917	10	0.894541
	Monocytes# (Mon#, 10^9/L )		7.53	14.58	6.82	8.2	4.96			6.38	9.55		13.63	7.32			8.77444	3.27833	9			3.91	8.71		4.76							5.79333	2.56141	3	0.185893	8.774	5.793	2.981	2.099	1.42	10	0.493023
	Neutrophil# (Neu#, 10^9/L )		0.04	0.09	0.13	0.26	0.04			0.15	0.12		0.12	0.1			0.116667	0.0657647	9			14.04	0.04		0.02							4.7	8.08868	3	0.086579	0.1167	4.7	-4.583	2.412	1.9	10	0.390477
	Eosinophilic granulocyte# (Eos#, 10^9/L )		0.59	1.29	1.43	1.04	1.27			1.16	0.94		0.95	1.4			1.11889	0.268349	9			2.31	0.56		0.89							1.25333	0.929857	3	0.683356	1.119	1.253	-0.1344	0.3201	0.42	10	0.894541
	Basophilic granulocyte# (Bas#, 10^9/L )		0.08	0.18	0.05	0.07	0.11			0.12	0.07		0.05	0.07			0.0888889	0.0416667	9			0.1	0.13		0.08							0.103333	0.0251661	3	0.59007	0.08889	0.1033	-0.01444	0.02595	0.5566	10	0.894541
	Platelet count (PLT, 10^9/L )	273	118	189	209	388	171	353	203	183	324	383	225	350	402	313	272.267	92.3398	15	294	431	414	321	393	234	308				212	291	322	76.7887	9	0.188958	272.3	322	-49.73	36.69	1.356	22	0.493023
	Platelet distribution width (PDW, fL )	17.7	14.8	18.5	17.3	18.8	16.7	18.8	16.2	14.5	17.6	18.1	15.5	19.3	19.4	18.5	17.4467	1.58694	15	16.3	18.6	18.6	15.2	15.3	18.4	16.1				15.3	15.1	16.5444	1.54686	9	0.187361	17.45	16.54	0.9022	0.663	1.361	22	0.493023
	Mean platelet volume (MPV, fL )	11.4	11.5	11.4	11.4	10.8	10.5	11.6	10.1	10.5	10.3	11.7	10.6	11.4	11.1	12.2	11.1	0.6	15	10	10.2	10.7	10.2	9	11.8	10.4				9.3	9.1	10.0778	0.881445	9	0.002637	11.1	10.08	1.022	0.3016	3.389	22	0.082552
	Red cell volume distribution width-Coefficient of variation (RDW-CV, % )	19.4	21.5	19.1	18.7	19.6	20.9	20.1	19.3	20.9	19.8	19.5	18.1	20.7	20.3	17.8	19.7133	1.05144	15	19.1	18.9	20	18.7	21.3	20.7	17.1				18.3	18.8	19.2111	1.27617	9	0.306737	19.71	19.21	0.5022	0.48	1.046	22	0.716833
	Red cell volume distribution width-Standard deviation (RDW-SD, fL )	43.2	44.6	43	40	40.3	44.4	41.5	38.2	40	39.7	39.9	35.2	43	42.5	36.5	40.8	2.75655	15	34.9	36.8	41.5	35.3	39.7	44.8	38.2				38.9	39.2	38.8111	3.08401	9	0.115666	40.8	38.81	1.989	1.214	1.638	22	0.402391
	Plateletcrit (PCT, PCT )	0.31	0.14	0.22	0.24	0.42	0.18	0.41	0.21	0.19	0.33	0.45	0.24	0.4	0.45	0.38	0.304667	0.107694	15	0.3	0.44	0.44	0.33	0.36	0.28	0.32				0.197	0.265	0.325778	0.079336	9	0.615694	0.3047	0.3258	-0.02111	0.04146	0.5092	22	0.894541
	Aspartate aminotransferase (AST, U/L )	78	43.9	56.2	37.7	41.8	65.2	32.7	97.3	50	41.4	48.1	31.7	50.7	57.5	44.3	51.7667	17.5269	15	49.8	28.2	161.3	61.9	43.8	42.3	22.4	30	43	27.6	20.3	19.1	45.8083	38.6604	12	0.597985	51.77	45.81	5.958	11.16	0.5341	25	0.894541
	Alanine aminotransferase (ALT, U/L )	86.1	42.7	77.1	39.1	38.4	58.5	35.8	80	72.4	66.4	61.2	61.8	75	49.8	54.1	59.8933	16.3166	15	81	40.2	55.6	53.2	39.1	41.6	35.2	28.6	35.3	19.9	52.7	38.5	43.4083	15.6822	12	0.013646	59.89	43.41	16.49	6.212	2.654	25	0.142415
	Alkaline phosphatase (ALP, U/L )	297.7	261	353.8	234.9	175.7	318.7	128.1	378.9	279.9	234.1	202.4	204.6	368.8	126.8	337	260.16	82.7646	15	79.5	62.5	232	138.8	76.3	237.2	558.7	430.6	1184.8	583	71.3	62.9	309.8	336.281	12	0.58474	260.2	309.8	-49.64	89.66	0.5536	25	0.894541
	γ-glutamyl transpeptidase (GGT, U/L )																													79.5	111.5	95.5	22.6274	2			95.5
	Creatine kinase (CK, U/L )																													451.2	236.4	343.8	151.887	2			343.8
	Total protein (TP, g/L )	84.9	79.4	70.5	71.2	75.7	67.7	75.4	81.5	79.1	68.3	76.4	73.7	72.8	84	74.3	75.66	5.30092	15	66.2	75.1	78.5	61.1	79.9	67.6	66.8	44.6	43.6	44.1	69	74.8	64.275	13.313	12	0.00553	75.66	64.28	11.39	3.749	3.036	25	0.086576
	Albumin (ALB, g/L )																													42.3	39.7	41	1.83848	2			41
	Globumin (GLOB, g/L )																													26.7	35.1	30.9	5.9397	2			30.9
	ALB/GLOB (A/G,)																													1.584	1.131	1.3575	0.320319	2			1.358
	Uric acid (UA, μmol/L )	3.2	7.7	3.5	4.8	4.1	4.4	8.4	2.6	5.8	3.9	7	6.7	5.6	2.9	2.3	4.86	1.92384	15	7.5	5.5	3.4	3.1	5.1	4.2	6.7	8.6	3.3	4.1			5.15	1.90453	10	0.714262	4.86	5.15	-0.29	0.7823	0.3707	23	0.894541
	UREA (UREA, mmol/L )	4.8	2.81	2.95	2.66	2.48	3.45	3.62	2.14	3.22	1.78	2.15	2.4	2.24	2.83	3.45	2.86533	0.76286	15	2.32	2.6	3.36	1.95	3.53	2.65	1.92	1.51	1.7	2.69	3.19	3.48	2.575	0.709001	12	0.320526	2.865	2.575	0.2903	0.2865	1.014	25	0.716833
	Creatinine (CREA, μmol/L )	67.3	78.2	81.4	73.1	103	84.9	91	61.4	50.8	45.9	63.3	53.6	50.2	58.4	56.8	67.9533	16.7788	15	66.9	109.7	75.6	39.3	84.6	52.9	57.6	50.5	53.3	48	49.5	61.4	62.4417	19.4719	12	0.436942	67.95	62.44	5.512	6.977	0.79	25	0.855042
	Glucose (GLU, mmol/L )	1.33	2.45	3.1	2.19	2.48	2.35	3.97	3.31	3.6	2.28	2.28	2.61	1.6	6.99	2.42	2.864	1.33565	15	1.38	5.72	1.48	2.57	6.44	1.29	1.39	4.57	4.26	4.14	9.04	13.61	4.6575	3.70879	12	0.093462	2.864	4.658	-1.794	1.028	1.744	25	0.390477

## Sheet: Supplementary Table 4
	Supplementary Table 4 | Wuzhishan minipigs information.
	Pig id	Sex	Derived pig id	Date of Birth	Genotyping	Status	Survival time	Dead reason
	153	male	153	2018-09-14	WT	dead	19 months	eliminated for management needs（2020.5.4）
	666	male	153	2020-10-27	GGTA1 -2/+1	dead	1 months	crushed to death by a sow, eliminated
	669	male	153	2020-10-27	GGTA1 -2/+1	live	to now	-
	214	female	214	2018-11-20	WT	dead	19 months	eliminated for management needs （2020.7.6）
	659	female	214	2020-10-13	GGTA1 -2/+1	live	to now	-
	657	female	214	2020-10-13	GGTA1 -2/+1	live	to now	-
	681	female	214	2020-11-27	GGTA1 -1/+1	dead	7 months	integrated plasmid found, eliminated
	2216	male	669/657	2021-09-30	GGTA1 -2/+1	dead	8 months（2022.6.17)	weight loss after blood draw stress, eliminated
	2217	male	669/657	2021-09-30	GGTA1 -2/+1	dead	8 months (2022.6.18）	weight loss after blood draw stress, eliminated
	2218	female	669/657	2021-09-30	GGTA1 -2/+1	live	to now	-
	937	male		2020-10-11	WT	live	to now	-
	950	male		2020-10-12	WT	live	to now	-
	872	female		2020-08-26	WT	live	to now	-
	875	female		2020-08-26	WT	dead	21 months（2020.6.17)	eliminated for management needs

## Sheet: Supplementary Table 5
		Supplementary Table 5 | Quality control of WGS data.
		Sequencing platform	Sample id	Reads(R1)(M)	Reads(R2)(M)	Reads(R1)Q30%	Reads(R2)Q30%	Mean Q30	Aligned	Total reads	Proper reads	Properly paired	Duplicate reads	Duplication	Insert size	Mean coverage
		DNBSEQ-T7	WT-153-A	1008.1	1008.1	92.61	86.1	89.355	0.997	2061197515	2053337049	0.996186	165401970	0.0802456	251	118.52
			WT-214-A	906.1	906.1	91.56	85.96	88.76	0.9975	1843650869	1837513848	0.996671	145562385	0.0789533	257	106.64
			WT-153-C	931.3	931.3	92.2	86.18	89.19	0.998	1874375586	1869369063	0.997329	163088161	0.0870093	255	109.84
			WT-214-C	964.1	964.1	92.19	85.78	88.985	0.9974	1956842860	1950017754	0.996512	155338550	0.0793822	270	113.67
			KO-153-C(-2+1)	1028.2	1028.2	90.01	87.01	88.51	0.9763	2067944734	2017342909	0.97553	176931288	0.085559	245	115.89
			KO-214-C(-2+1)	902.9	902.9	92.34	86.79	89.565	0.98	1816661213	1779054431	0.979299	133963751	0.0737417	247	102.6
			KO-214-C(-1+1)	963.5	963.5	92.15	86.73	89.44	0.9806	1953474182	1913759743	0.97967	150781659	0.0771864	268	110.35
			666	897	897	91.43	86.14	88.785	0.9964	1823005983	1814996016	0.995606	153124328	0.0839955	265	105.57
			669	972.2	972.2	92.69	90.01	91.35	0.9843	1977136079	1943905905	0.983193	51345568	0.0259697	277	111.7
			657	1039.4	1039.4	93.92	91.24	92.58	0.9971	2104645984	2096569904	0.996163	54682359	0.0259817	266	122.6
			659	887.9	887.9	91.76	86	88.88	0.9976	1810337867	1804357087	0.996696	148759491	0.0821722	260	104.53
			681	901.6	901.6	92.19	86.22	89.205	0.9974	1843474866	1837004685	0.99649	152971749	0.0829801	260	106.06
			2216	938.5	938.5	93.76	89.82	91.79	0.9932	1909216809	1894142645	0.992105	43755011	0.0229178	278	109.67
			2217	1167.1	1167.1	93.79	91.06	92.425	0.9932	2383325601	2364904956	0.992271	66806697	0.0280309	253	135.97
			2218	1159.5	1159.5	93.49	91.22	92.355	0.9929	2363257413	2344192054	0.991933	68867275	0.0291408	255	135.19
			153-Cas9	1021.5	1021.5	91.6	87.25	89.425	0.9817	2056878620	2017415431	0.980814	75785284	0.0368448	229	113.28
			153-Control	1059.3	1059.3	91.9	89.14	90.52	0.9794	2134778978	2088626311	0.978381	84288851	0.0394836	223	117.74
			153-sgRNACas9-KO-	1227	1227	96.97	89.47	93.22	0.9765	2472493882	2412587903	0.975771	153122709	0.0619305	218	132.62
			214-Cas9High	869.1	869.1	91.43	88.44	89.935	0.9915	1751818165	1735448300	0.990655	41530404	0.023707	236	100.15
			214-Cas9Low	941.3	941.3	91.34	87.6	89.47	0.9667	1894736635	1829724093	0.965688	59920748	0.0316248	231	102.06
			214-Cas9	934.9	934.9	89.88	87.61	88.745	0.9792	1883016371	1842133955	0.978289	52085419	0.0276606	231	104.26
			214-Control	1064.9	1064.9	92.16	88.58	90.37	0.9825	2144131821	2104615860	0.98157	66315789	0.030929	238	120.46
			214-sgRNACas9-KO-	872.1	872.1	91.81	88.27	90.04	0.9771	1756869918	1715234379	0.976301	47948431	0.027292	233	97.38
			Average	985.109	985.109	92.3122	87.94	90.1261	0.987543	1.99492e+09	1.9681e+09	66315789	0.030929	0.0531626	249.826	112.902

## Sheet: Supplementary Table 6
	Supplementary Table 6 | Statistics of SVs in each filter step.
	Group	Control sample	Treated sample	Raw SVs (DEL+DUP+INS+INV)*		Filtered SVs (DEL+DUP+INS+INV)*		Merged SVs (DEL+DUP+INS+INV)*	Final SVs (DEL+DUP+INS+INV)*
				Manta	delly	Manta	delly	Merged by SURVIVOR	IGV checked
	-	WT-153-A	WT-153-C	12+13+1+7155	34913+12615+934+37977	0+0+0+864	1+3+0+8	0+0+0+0	0+0+0+0
	CRISPR/Cas9 plasmid knockout successfully	WT-153-C	KO-153-C(-2/+1)	25+24+1+31	42055+12490+952	12+4+0+0	0+3+0+0	0+3+0+0	0+3+0+0	7 57526545 SVTYPE=DUP;SVMETHOD=SURVIVOR1.0.7;CHR2=7;END=57558188;CIPOS=0,1;CIEND=0,0;STRANDS=-+;ANN=<DUP:TANDEM>|frameshift_variant|HIGH|HMG20A|ENSSSCG00000001871; 11 46613888 SVTYPE=DUP; SVMETHOD=SURVIVOR1.0.7;CHR2=11;END=46614170;CIPOS=0,1;CIEND=-7,0;STRANDS=-+;ANN=<DUP:TANDEM>|intron_variant|MODIFIER|ENSSSCG00000042071; 12 36000090 SVTYPE=DUP;SVMETHOD=SURVIVOR1.0.7;CHR2=12;END=36105465;CIPOS=0…
	-	KO-153-C(-2/+1)	669	60+56+2+1401	37979+13456+969+21608	8+4+0+78	4+2+0+4	0+0+0+0	0+0+0+0
	-	KO-153-C(-2/+1)	666	23+14+0+1401	34333+12633+933+27410	0+1+0+161	1+1+0+4	0+0+0+0	0+1+0+0	6 83190772 SVLEN=5031;SVTYPE=DUP;CHR2=6;END 83195804;STRANDS=-+;ANN=<DUP:TANDEM>|frameshift_variant&splice_acceptor_variant&splice_don or_variant&splice_region_variant&intron_variant|HIGH|MAN1C1|ENSSSCG00000023235;
		WT-214-A	WT-214-C	27+28+2+1263	31007+13087+917+45167	1+0+1+61	1+0+0+0	0+0+0+0	0+0+0+0
	CRISPR/Cas9 plasmid knockout successfully	WT-214-C	KO-214-C(-2/+1)	26+23+0+19	34214+12844+907+29500	5+5+0+0	3+2+0+0	0+0+0+0	0+0+0+0
	-	KO-214-C(-2/+1)	659	25+27+0+2521	34495+12406+901+27060	8+0+0+301	5+0+0+0	0+0+0+0	0+0+0+0
	-	KO-214-C(-2/+1)	657	82+69+1+337	37525+13460+955+19880	10+6+0+16	13+3+0+2	0+0+0+0	0+0+0+0
	CRISPR/Cas9 plasmid knockout successfully	WT-214-C	KO-214-C(-1/+1)	17+19+1+879	30775+13064+917	1+0+0+53	1+0+0+2	0+0+0+0	0+0+0+0
	-	KO-214-C(-1/+1)	681	15+9+0+1646	30762+12926+914+57562	2+2+0+173	2+2+0+2	0+0+0+0	0+0+0+0
	-	WT-214-A	657	97+77+1+238	32213+13706+957+28526	17+8+0+7	17+5+0+2	0+0+0+0	0+0+0+0
	-	WT-214-A	659	29+26+0+857	30440+12719+907+41565	10+4+0+46	9+2+0+1	0+0+0+0	0+0+0+0
	-	WT-214-A	681	21+17+2+1700	30915+12888+903+45814	4+0+0+98	3+2+0+2	0+0+0+0	0+0+0+0
	-	WT-153-A	666	23+30+0+236	30492+12806+930+57233	2+5+0+11	0+4+0+0	0+4+0+0	0+4+0+0	6 83190772 SVLEN=5031;SVTYPE=DUP;CHR2=6;END 83195804;STRANDS=-+;ANN=<DUP:TANDEM>|frameshift_variant&splice_acceptor_variant&splice_don or_variant&splice_region_variant&intron_variant|HIGH|MAN1C1|ENSSSCG00000023235; 7 57526545 SVTYPE=DUP;SVMETHOD=SURVIVOR1.0.7;CHR2=7;END=57558188;CIPOS=0,1;CIEND=0,0;STRANDS=-+;ANN=<DUP:TANDEM>|frameshift_variant|HIGH|HMG20A|ENSSSCG00000001871; 11 46613888 SVTYPE=D…
	-	WT-153-A	669	64+80+6+527	32742+13623+969+42562	5+14+3+15	2+4+0+3	0+0+0+0	0+4+0+0	6 83190772 SVLEN=5031;SVTYPE=DUP;CHR2=6;END 83195804;STRANDS=-+;ANN=<DUP:TANDEM>|frameshift_variant&splice_acceptor_variant&splice_don or_variant&splice_region_variant&intron_variant|HIGH|MAN1C1|ENSSSCG00000023235; 7 57526545 SVTYPE=DUP;SVMETHOD=SURVIVOR1.0.7;CHR2=7;END=57558188;CIPOS=0,1;CIEND=0,0;STRANDS=-+;ANN=<DUP:TANDEM>|frameshift_variant|HIGH|HMG20A|ENSSSCG00000001871; 11 46613888 SVTYPE=D…
	Empty plasmid	WT-153-C	153-Control	45+19+0+27	40533+12563+952+17027	5+2+0+1	4+0+0+1	0+0+0+0	0+0+0+0
		WT-214-C	214-Control	63+51+1+68	34447+13246+944+30821	8+7+1+1	7+1+0+1	0+0+0+0	0+0+0+0
	Cas9 only plasmid	WT-153-C	153-Cas9	59+27+0+32	41040+12603+953+16782	12+4+0+0	9+3+0+2	0+0+0+0	0+0+0+0
		WT-214-C	214-Cas9	46+28+1+61	33198+12803+919+30324	9+5+1+4	7+1+0+1	0+0+0+0	0+0+0+0
	Cas9 only plasmid (low dose)	WT-214-C	214-Cas9Low	58+33+0+35	33437+12956+922+29873	6+8+0+1	6+3+0+2	0+0+0+0	0+0+0+0
	Cas9 only plasmid (high dose)	WT-214-C	214-Cas9High	46+34+0+44	33628+12758+925+30743	6+5+0+1	8+1+0+2	0+0+0+0	0+0+0+0
	CRISPR/Cas9 plasmid knockout unsuccessfully	WT-153-C	153-sgRNACas9-KO-	106+25+0+49	41927+12931+944+17687	36+2+0+4	9+1+0+0	0+0+0+0	0+0+0+0
		WT-214-C	214-sgRNACas9-KO-	48+23+1+53	33188+12682+927+31050	8+5+1+3	7+1+0+2	0+0+0+0	0+0+0+0

## Sheet: Supplementary Table 7
	Supplementary Table 7 | MSIsensor's score caculated by MSIsensor.
	control sample	treated sample	MSIsensor's score	MSI score
	WT-153-A	WT-153-C	0	< 3.5
	WT-153-C	KO-153-C(-2+1)	0.02
	KO-153-C(-2+1)	669	0.02
	KO-153-C(-2+1)	666	0.02
	WT-214-A	WT-214-C	0
	WT-214-C	KO-214-C(-2+1)	0.02
	KO-214-C(-2+1)	659	0.01
	KO-214-C(-2+1)	657	0.01
	WT-214-C	KO-214-C(-1+1)	0.02
	KO-214-C(-1+1)	681	0.01
	WT-214-A	657	0.06
	WT-214-A	659	0.04
	WT-214-A	681	0.05
	WT-153-A	666	0.05
	WT-153-A	669	0.08

## Sheet: Supplementary Table 8
	Supplementary Table 8 | Statistics of identified high-confidence DNMs.
		Chromosome	Position	Reference allele	Alternative allele	Annotation	Gene_name
	F0-669 + F0-657 => F1-2216	1	168942417	G	A	intron_variant	THSD4
		3	7657111	G	A	intergenic_region	PLA2G10-ENSSSCG00000031411
		3	24808058	A	T	upstream_gene_variant	ENSSSCG00000032961
		4	48843061	A	G	intron_variant	MMP16
		5	40182611	C	A	intergenic_region	OSBPL8-ENSSSCG00000026719
		6	133661508	T	A	intergenic_region	ENSSSCG00000027421-ENSSSCG00000043601
		6	160777570	G	A	downstream_gene_variant	U2
		8	9039201	A	G	intron_variant	RAB28
		8	61278468	A	G	intergenic_region	ENSSSCG00000031193-ENSSSCG00000047276
		9	3145175	C	T	downstream_gene_variant	TPP1
		13	31826748	C	T	downstream_gene_variant	C3orf62
		14	72732844	C	A	intron_variant	ENSSSCG00000040498
		14	116500176	C	T	intergenic_region	U8-U6
		16	49403826	G	A	intergenic_region	DRD1-ENSSSCG00000047960
		18	658723	T	G	intron_variant	NCAPG2
		18	30219922	C	T	intron_variant	ENSSSCG00000040829
		18	36669967	T	C	downstream_gene_variant	ENSSSCG00000032793
		9	27750500	CAAAAAAAT	C	intergenic_region	MODIFIER
	F0-669 + F0-657 => F1-2217	1	167305525	C	A	intergenic_region	ENSSSCG00000004970-ENSSSCG00000045133
		2	64316679	A	T	intron_variant	ENSSSCG00000036342
		3	46057854	G	A	missense_variant	ENSSSCG00000031787
		3	106166071	C	T	intron_variant	RASGRP3
		5	40182611	C	A	intergenic_region	OSBPL8-ENSSSCG00000026719
		5	83864983	T	G	upstream_gene_variant	U6
		6	125811861	G	T	intergenic_region	ENSSSCG00000038382-PIK3C3
		9	9963955	G	C	intron_variant	MOGAT2
		9	9963992	T	C	intron_variant	MOGAT2
		9	9979109	G	C	downstream_gene_variant	ssc-mir-4335
		9	9996427	G	A	upstream_gene_variant	MOGAT2
		9	10000035	G	C	intron_variant	MOGAT2
		9	101566597	G	A	intron_variant	MAGI2
		10	15250150	T	C	intron_variant	SCCPDH
		10	22407340	T	C	intergenic_region	ENSSSCG00000041137-ENSSSCG00000040123
		10	62508594	G	A	intron_variant	ENSSSCG00000043083
		12	17036423	G	A	intron_variant	KANSL1
		17	17505643	C	G	intron_variant	PLCB1
		17	55422890	T	G	intron_variant	DOK5
		7	102421900	AT	A	intron_variant	NRXN3
	F0-669 + F0-657 => F1-2218	1	41037237	G	C	non_coding_transcript_exon_variant	ENSSSCG00000045816
		1	146603244	T	A	intergenic_region	ENSSSCG00000036442-ENSSSCG00000044951
		3	7657111	G	A	intergenic_region	PLA2G10-ENSSSCG00000031411
		3	125815038	G	A	intron_variant	ATP6V1C2
		5	40182611	C	A	intergenic_region	OSBPL8-ENSSSCG00000026719
		6	28964483	G	A	intron_variant	SMPD3
		6	63238558	T	G	intergenic_region	ENSSSCG00000049887-ENSSSCG00000044785
		6	140092202	C	A	intergenic_region	ENSSSCG00000050694-ENSSSCG00000032901
		7	60795936	G	A	intron_variant	ENSSSCG00000001924
		8	57853941	T	C	intergenic_region	ENSSSCG00000043804-ENSSSCG00000048331
		13	47011552	G	A	intron_variant	MAGI1
		13	206744376	G	T	intergenic_region	RRP1-AGPAT3
		16	46628344	C	A	intergenic_region	PIK3R1-ENSSSCG00000041125
		17	53796304	G	A	intergenic_region	ENSSSCG00000051401-ENSSSCG00000046693
		10	66857485	TCTTCA	T	upstream_gene_variant	ENSSSCG00000042651

## Sheet: Supplementary Table 9
	Supplementary Table 9 | Statistics of variants (SVs) in the trio.
	Trios	Tools	Raw_SVs (DEL+DUP+INS+INV)	Final_SVs (DEL+DUP+INS+INV)	Final de novo SVs	Overlap
	F0-669 + F0-657 => F1-2216	delly	32143+8038+1170+25208	4892+128+246+325	85+0+1+1	0+0+0+0
		manta	36847+4304+13325+3570	21401+1413+8148+1248	42+2+21+0
	F0-669 + F0-657 => F1-2217	delly	32254+8110+1182+24252	4967+121+221+298	70+1+1+2	0+0+0+0
		manta	36809+4311+12624+3632	21299+1360+7697+1210	55+0+32+1
	F0-669 + F0-657 => F1-2218	delly	31864+8070+1165+24470	5134+149+218+345	82+1+2+3	0+0+0+0
		manta	37140+4343+12965+3565	20890+1356+7699+1200	41+0+23+1

## Sheet: Supplementary Table 10
	Supplementary Table 10 | Quality control of RNAseq data.
	Sequencing platform		Sample id	Reads(R1)(M)	Reads(R2)(M)	Reads(R1) Q30(%)	Reads(R2) Q30(%)	Mean Q30	Uniquely mapped reads %
	DNBSEQ-T7		WT-872	28.9	28.9	91.55	89.71	90.63	0.8389
			WT-876	33.8	33.8	92.4	91.37	91.885	0.86
			WT-937	28.5	28.5	90.92	88.89	89.905	0.8301
			WT-950	33.9	33.9	91.04	88.36	89.7	0.8252
			F0-657	30.2	30.2	91.6	89.75	90.675	0.8187
			F0-659	38.2	38.2	91.49	90.72	91.105	0.8272
			F0-669	29.3	29.3	92.14	89.5	90.82	0.7838
			F1-2216	23.6	23.6	92.6	90.13	91.365	0.7038
			F1-2217	36.7	36.7	91.64	90.61	91.125	0.843
			F1-2218	25.9	25.9	90.86	89.16	90.01	0.7781
			Average	30.9	30.9	91.624	89.82	90.722	0.81088
